# Supplementary material for: Molecular network analysis of phosphotyrosine and lipid metabolism in hepatic PTP1b deletion mice
Source: Royal Society of Chemistry journal article supplement (doi:10.1039/c3ib40013a), 2013-01-01

S I V V T N y E E S I K

4-hydroxyphenylpyruvic acid dioxygenase

Charge State: +3

Scan Number: 5567

File Name: 091130ptp1blivers\_hfd\_basal2.raw

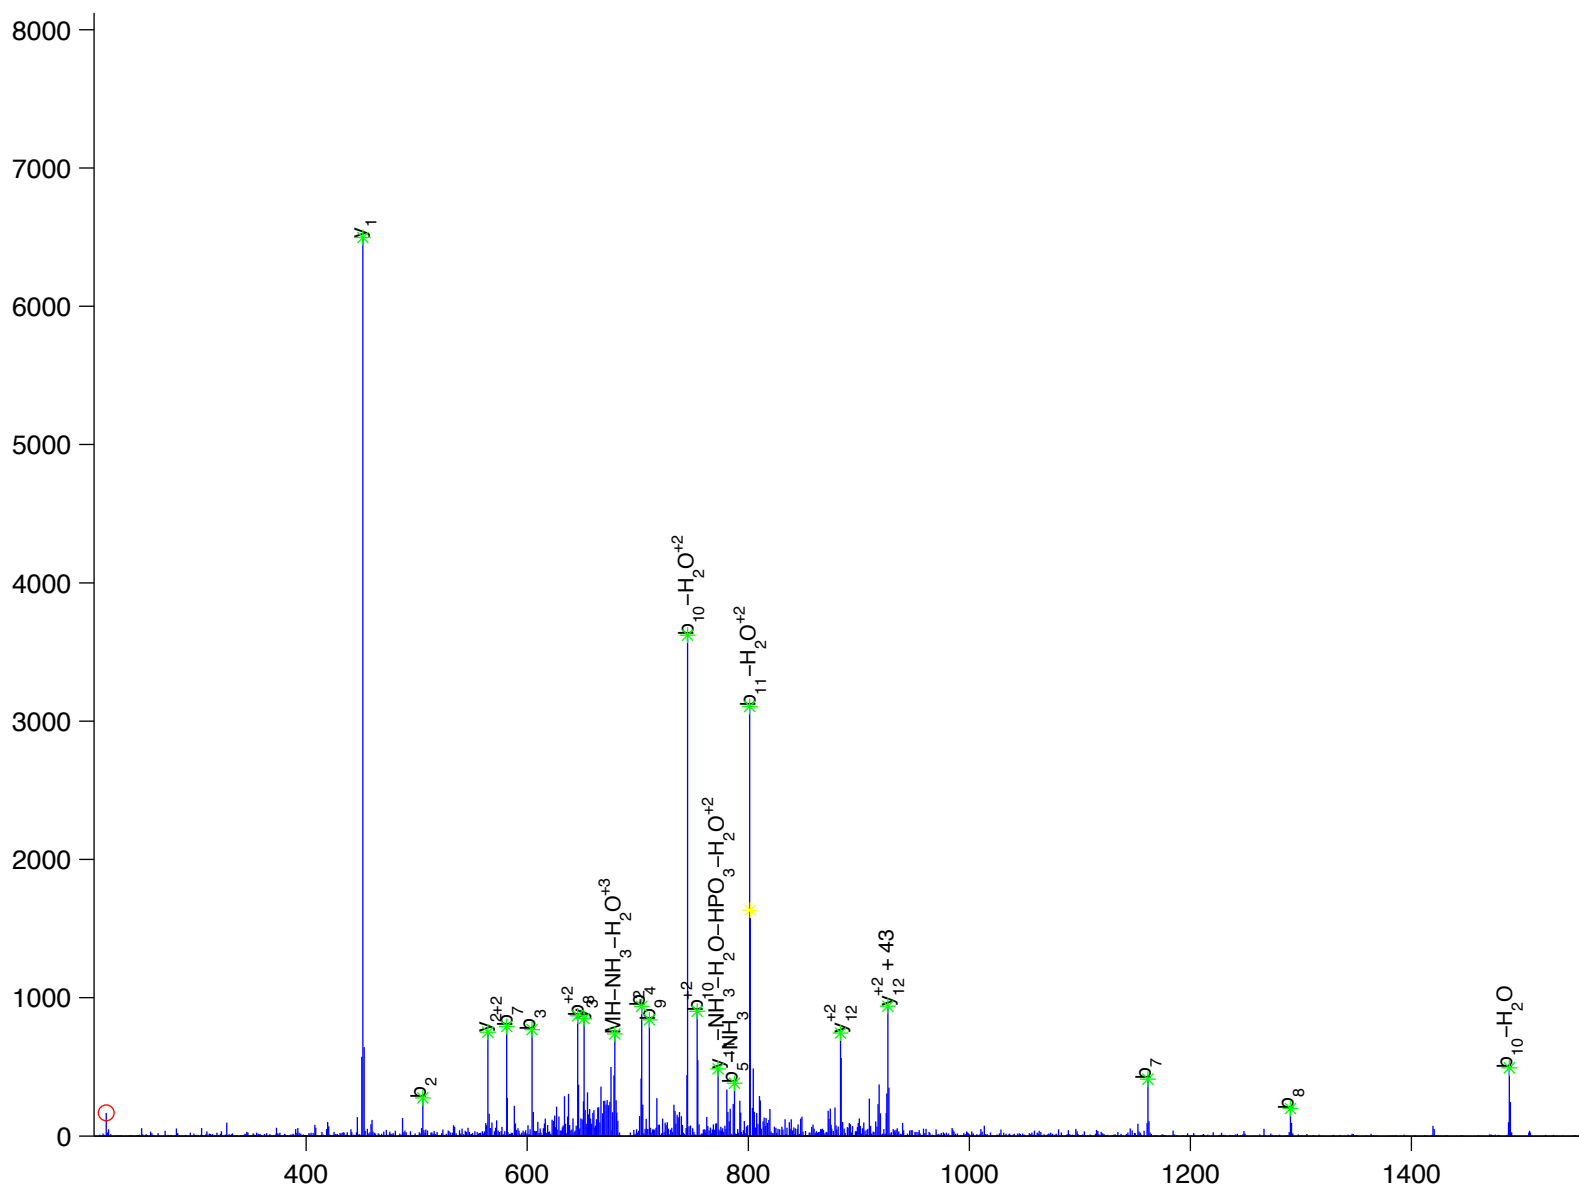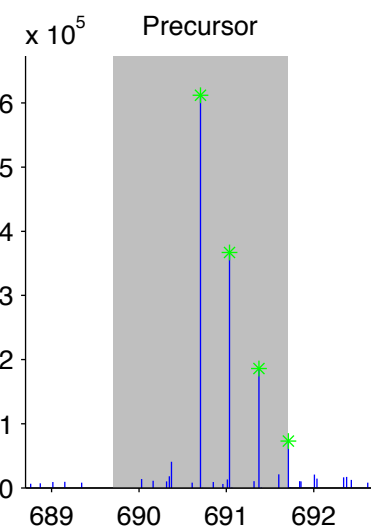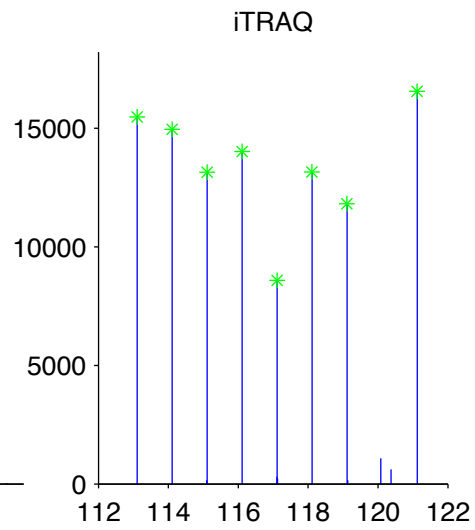

F W S V D D T Q V H T E y S S L R

4-hydroxyphenylpyruvic acid dioxygenase

Charge State: +3

Scan Number: 7378

File Name: 090806ptp1blivers\_M\_NC2.raw

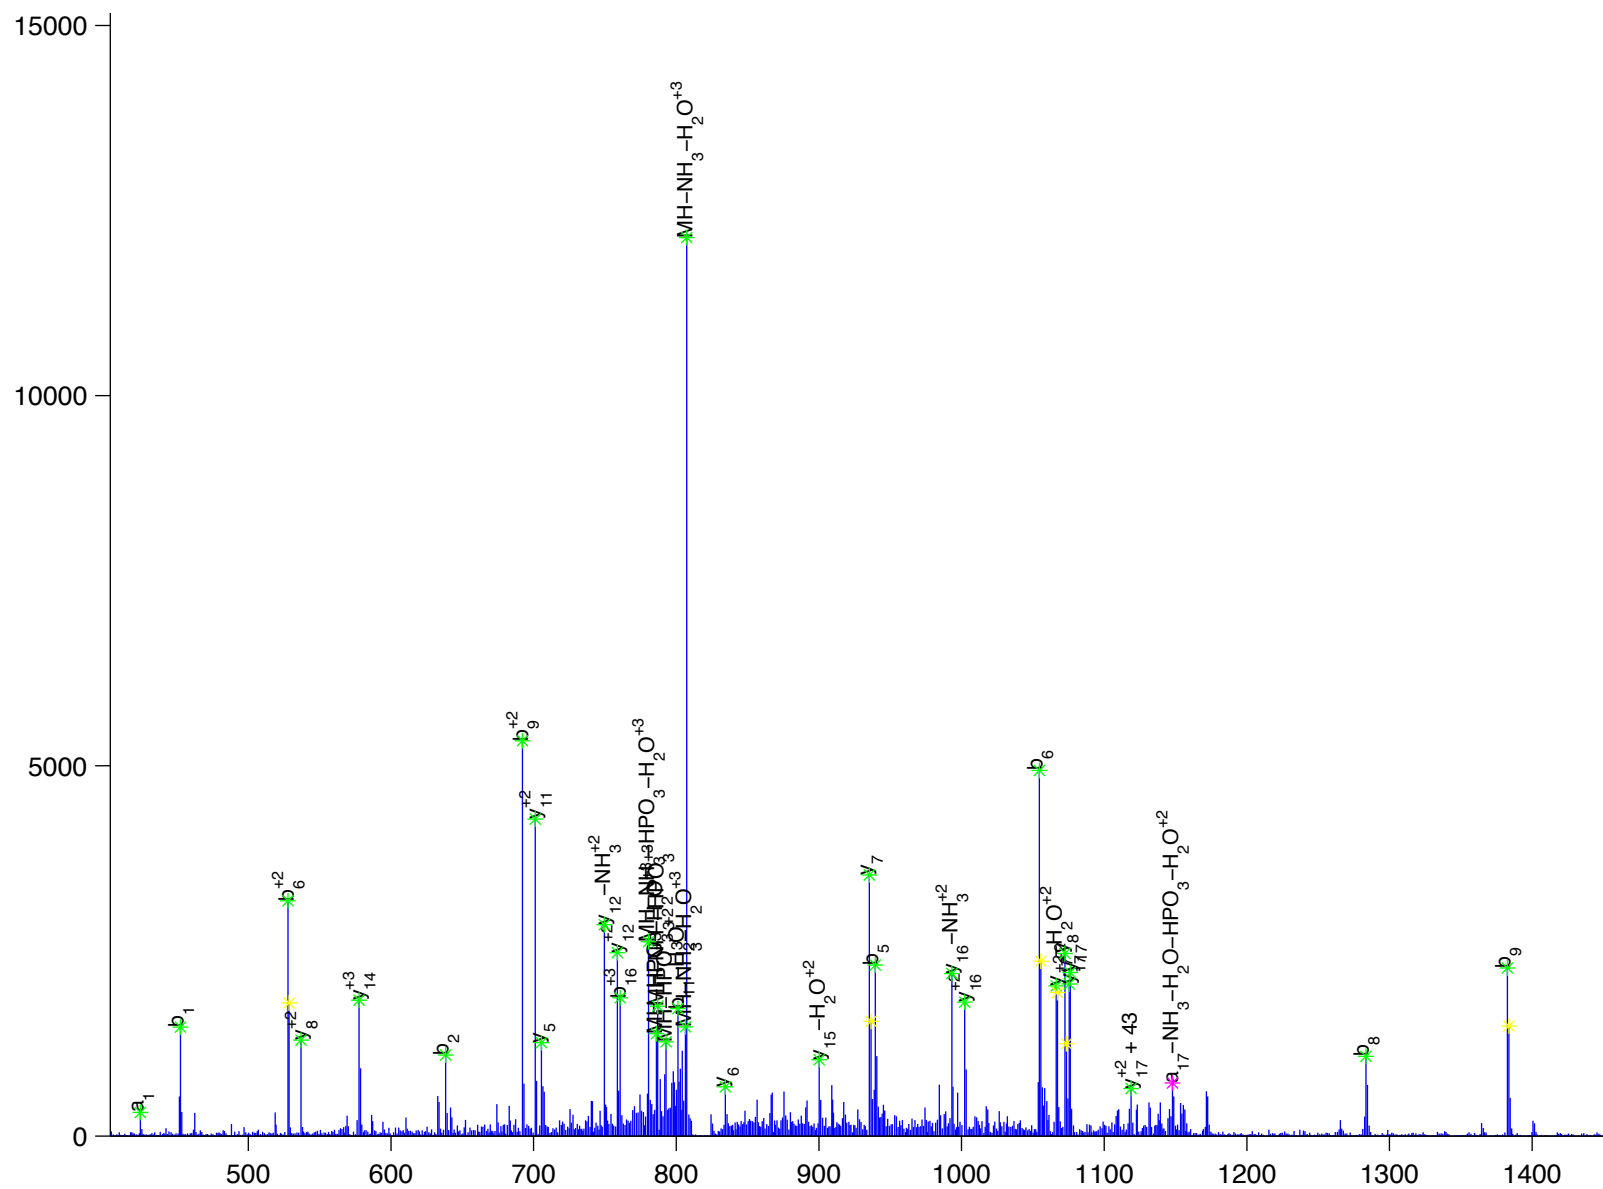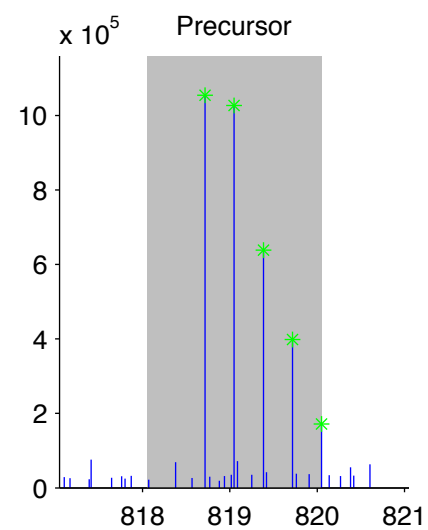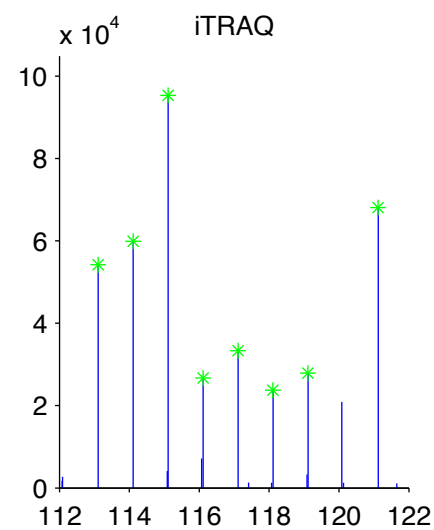

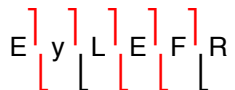

4-nitrophenylphosphatase domain and non-neuronal SNAP25-like protein homolog 1

Charge State: +2

Scan Number: 5657

File Name: 091130ptp1blivers\_hfd\_basal2.raw

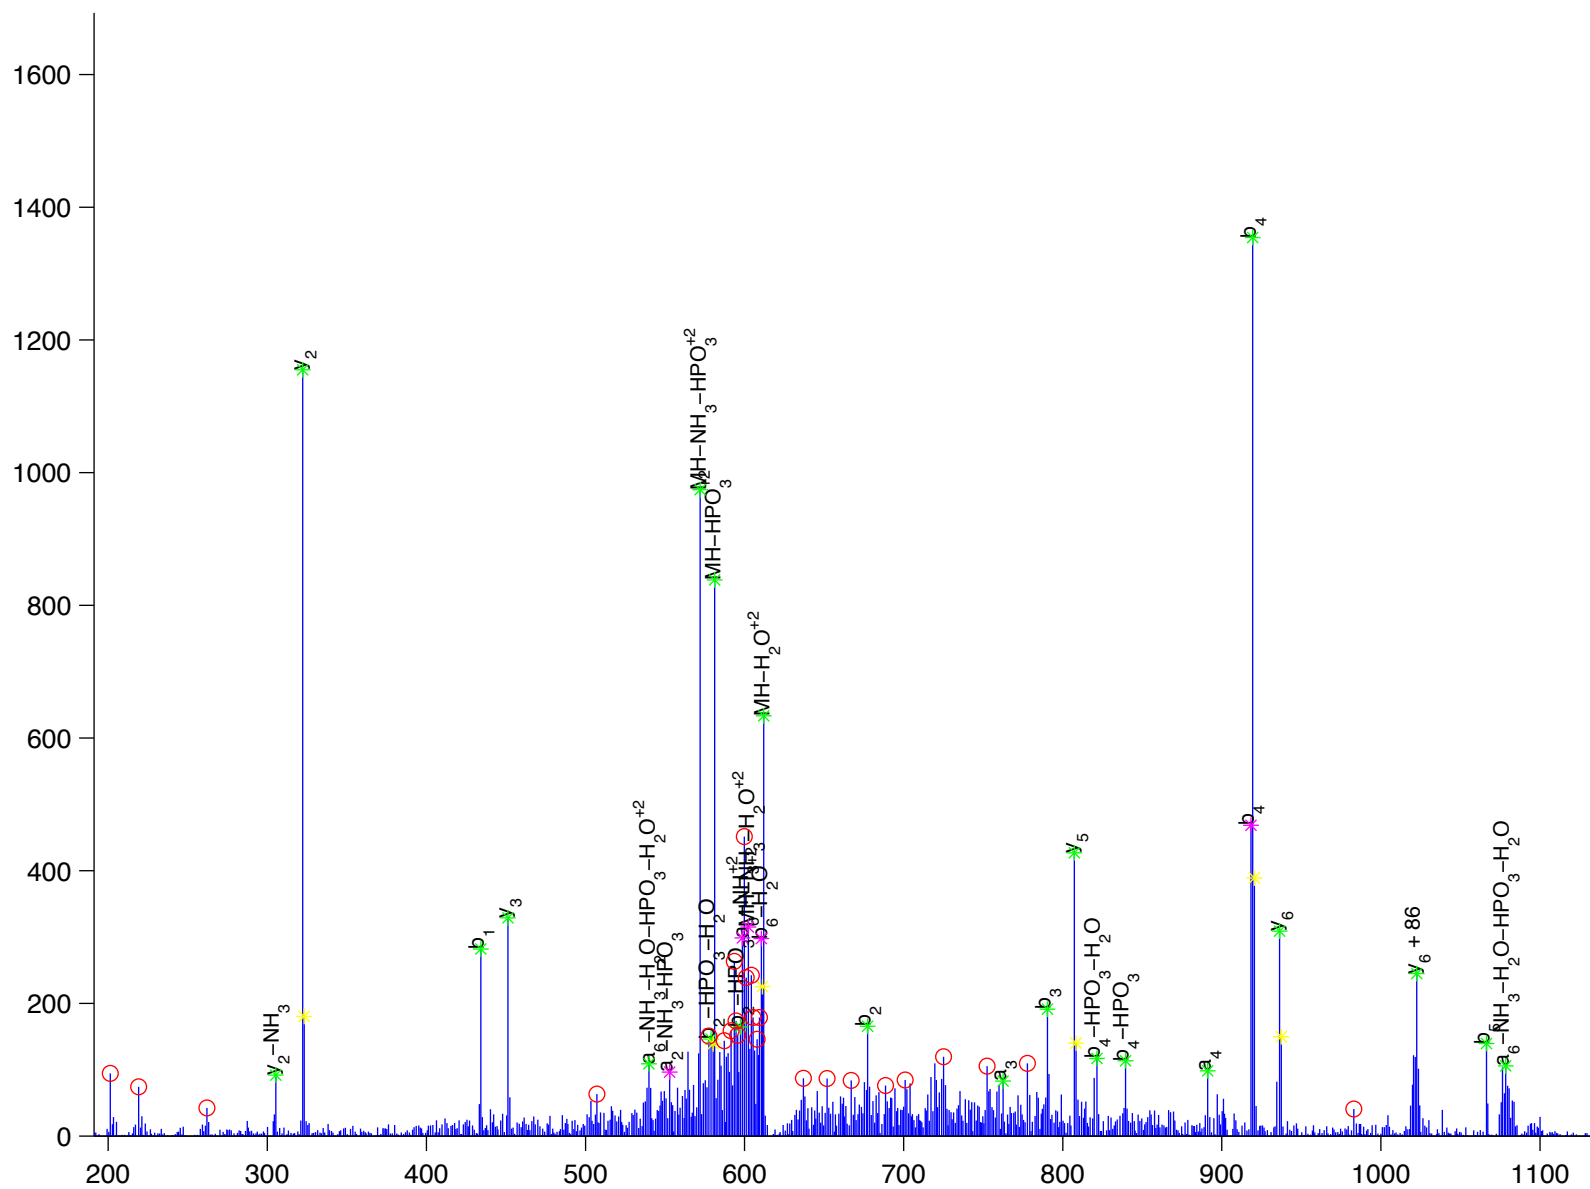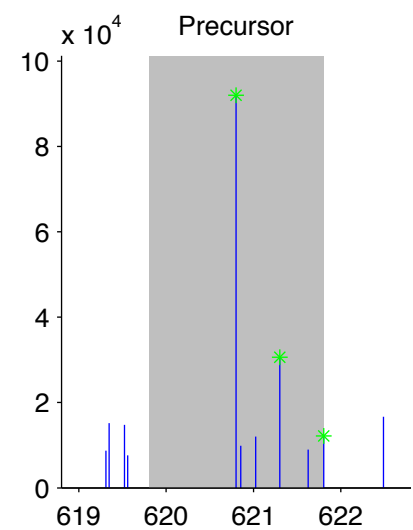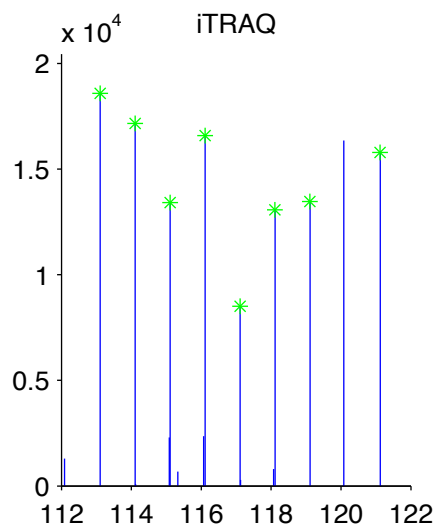

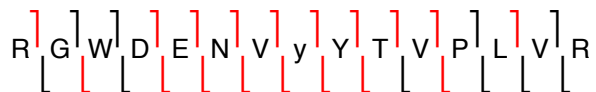

4-nitrophenylphosphatase domain and non-neuronal SNAP25-like protein homolog 1

Charge State: +3

Scan Number: 6717

File Name: 091130ptp1blivers\_hfd\_basal2.raw

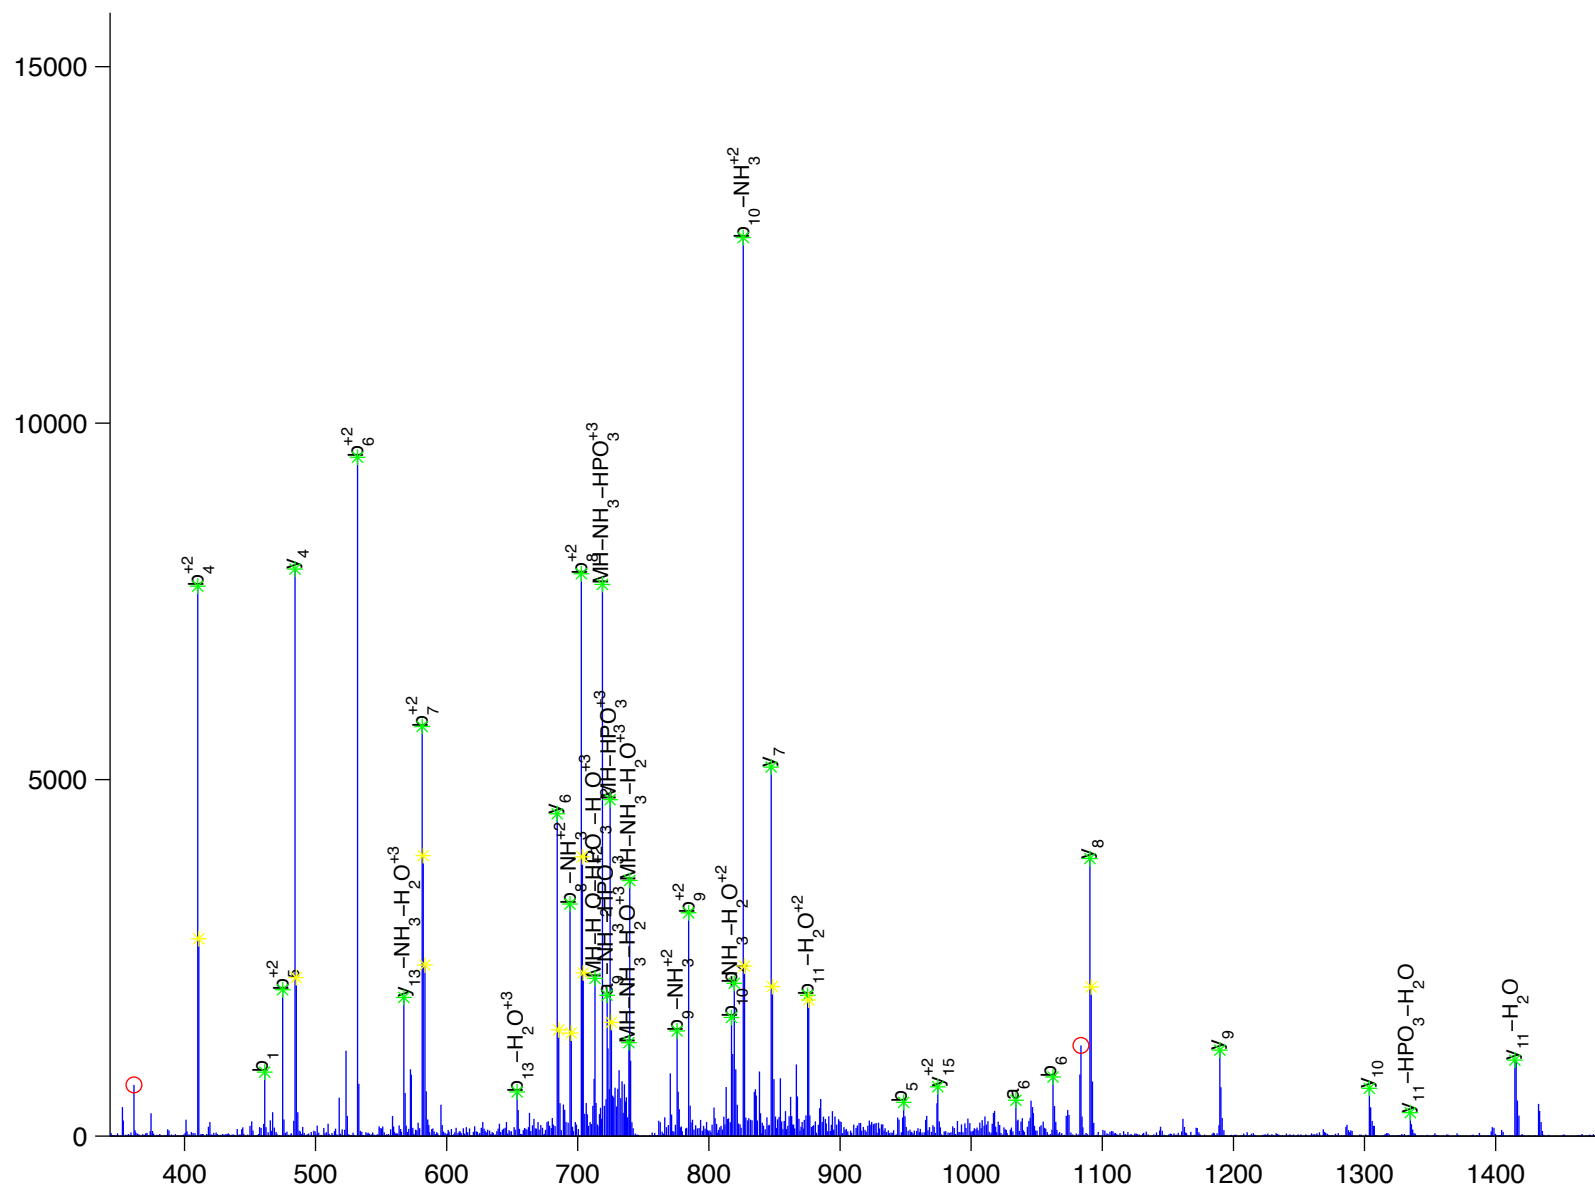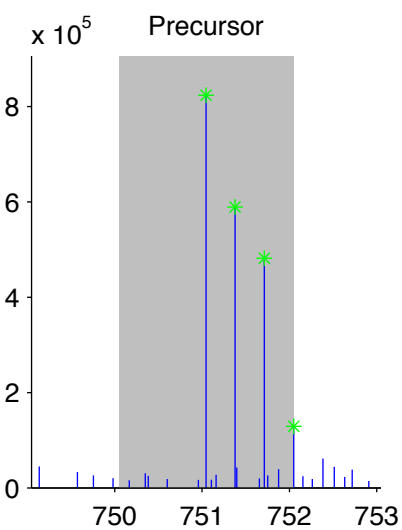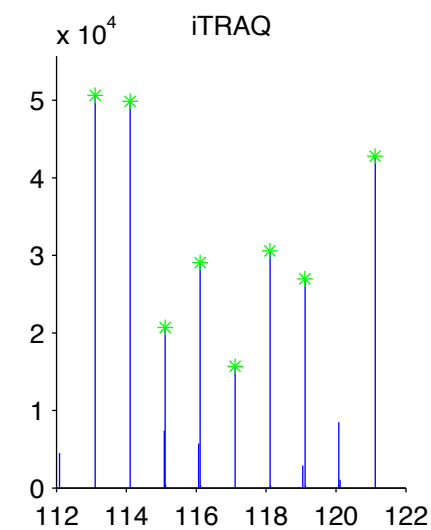



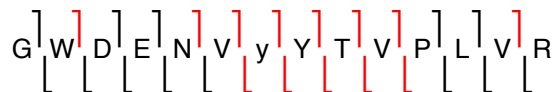

4-nitrophenylphosphatase domain and non-neuronal SNAP25-like protein homolog 1

Charge State: +3

Scan Number: 8751

File Name: 090806ptp1blivers\_M\_NC2.raw

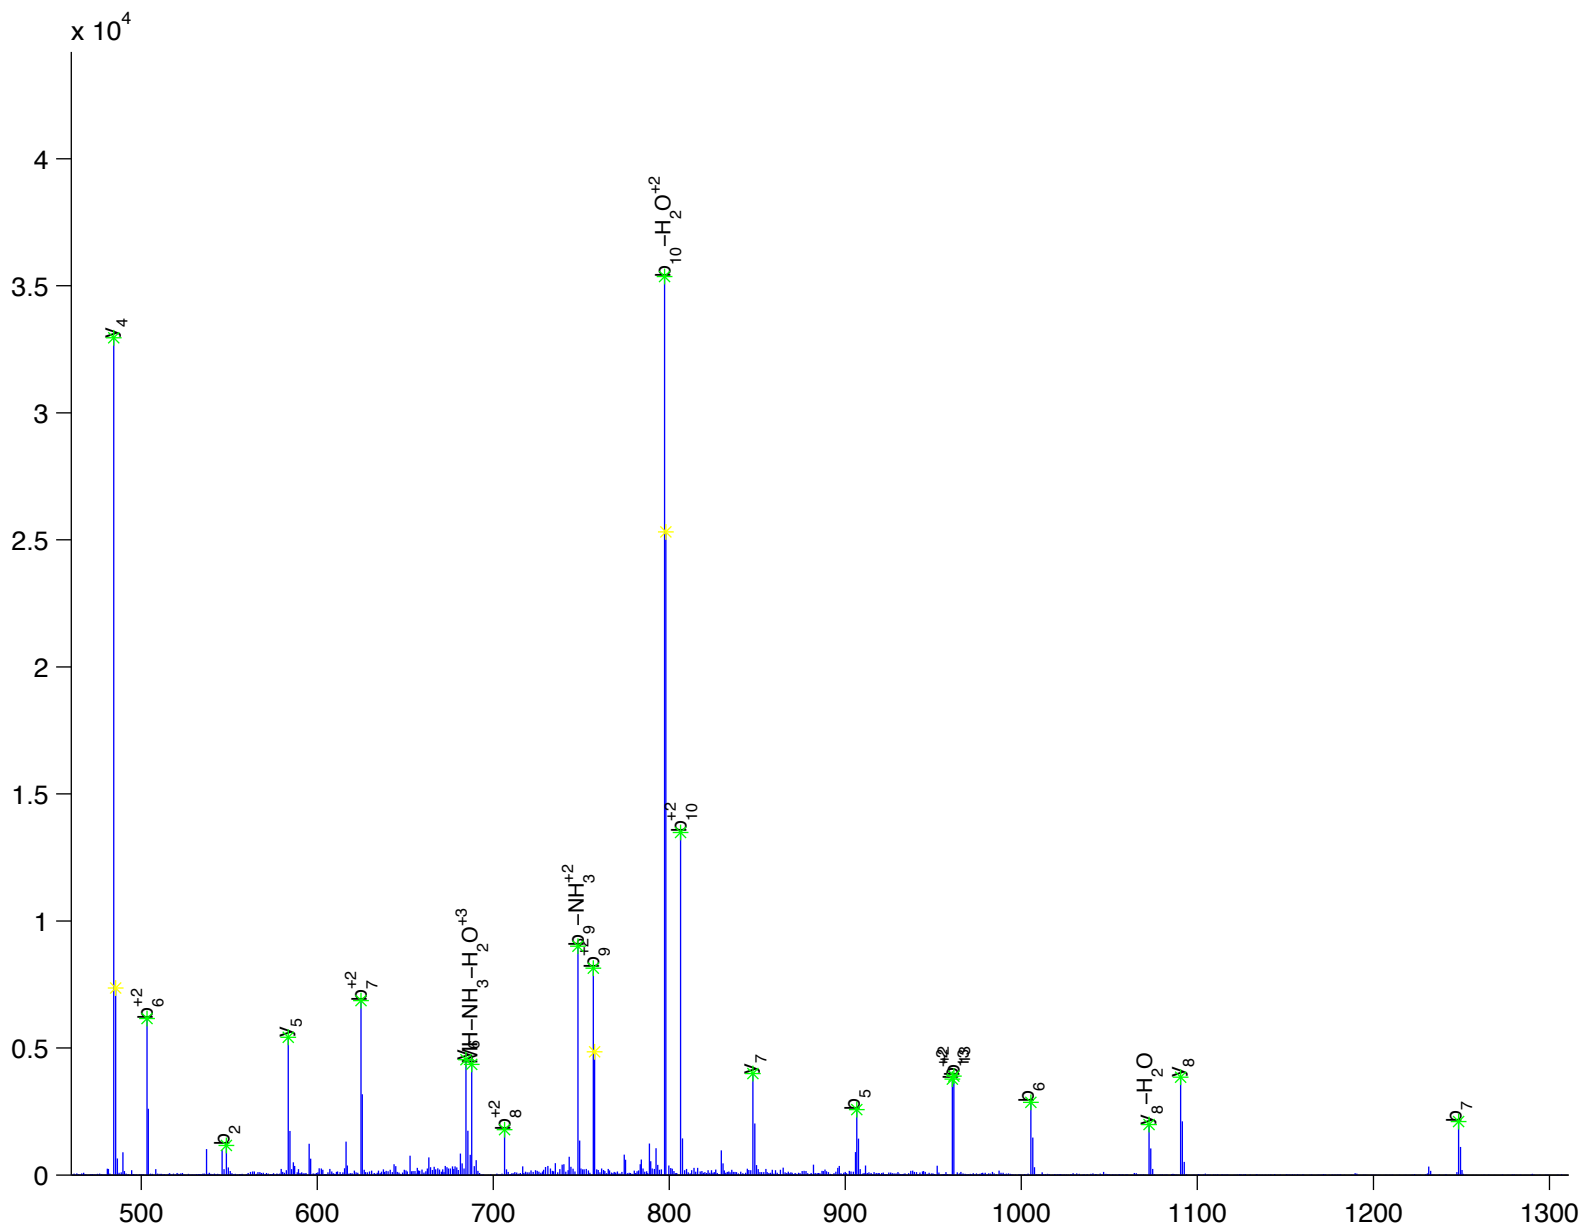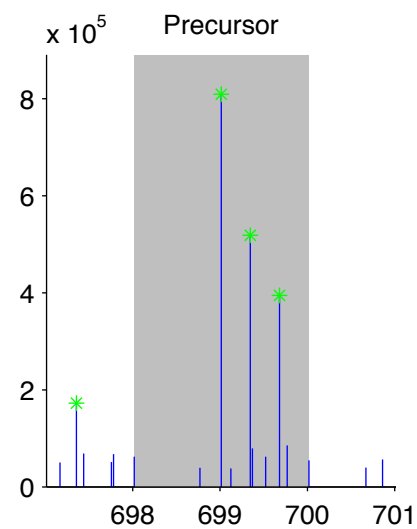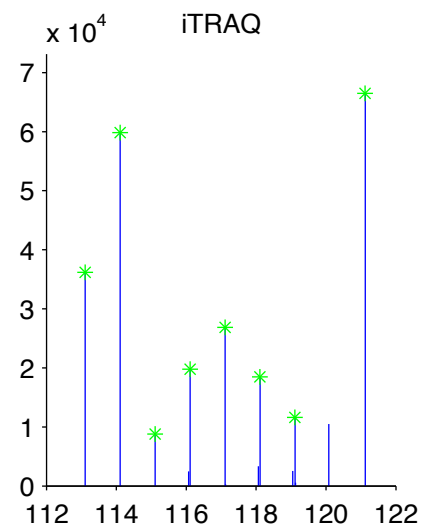

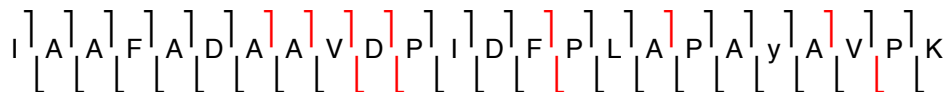

acetyl-Coenzyme A acetyltransferase 1 precursor

Charge State: +4

Scan Number: 4904

File Name: HJ072909\_HFD\_E1\_2.raw

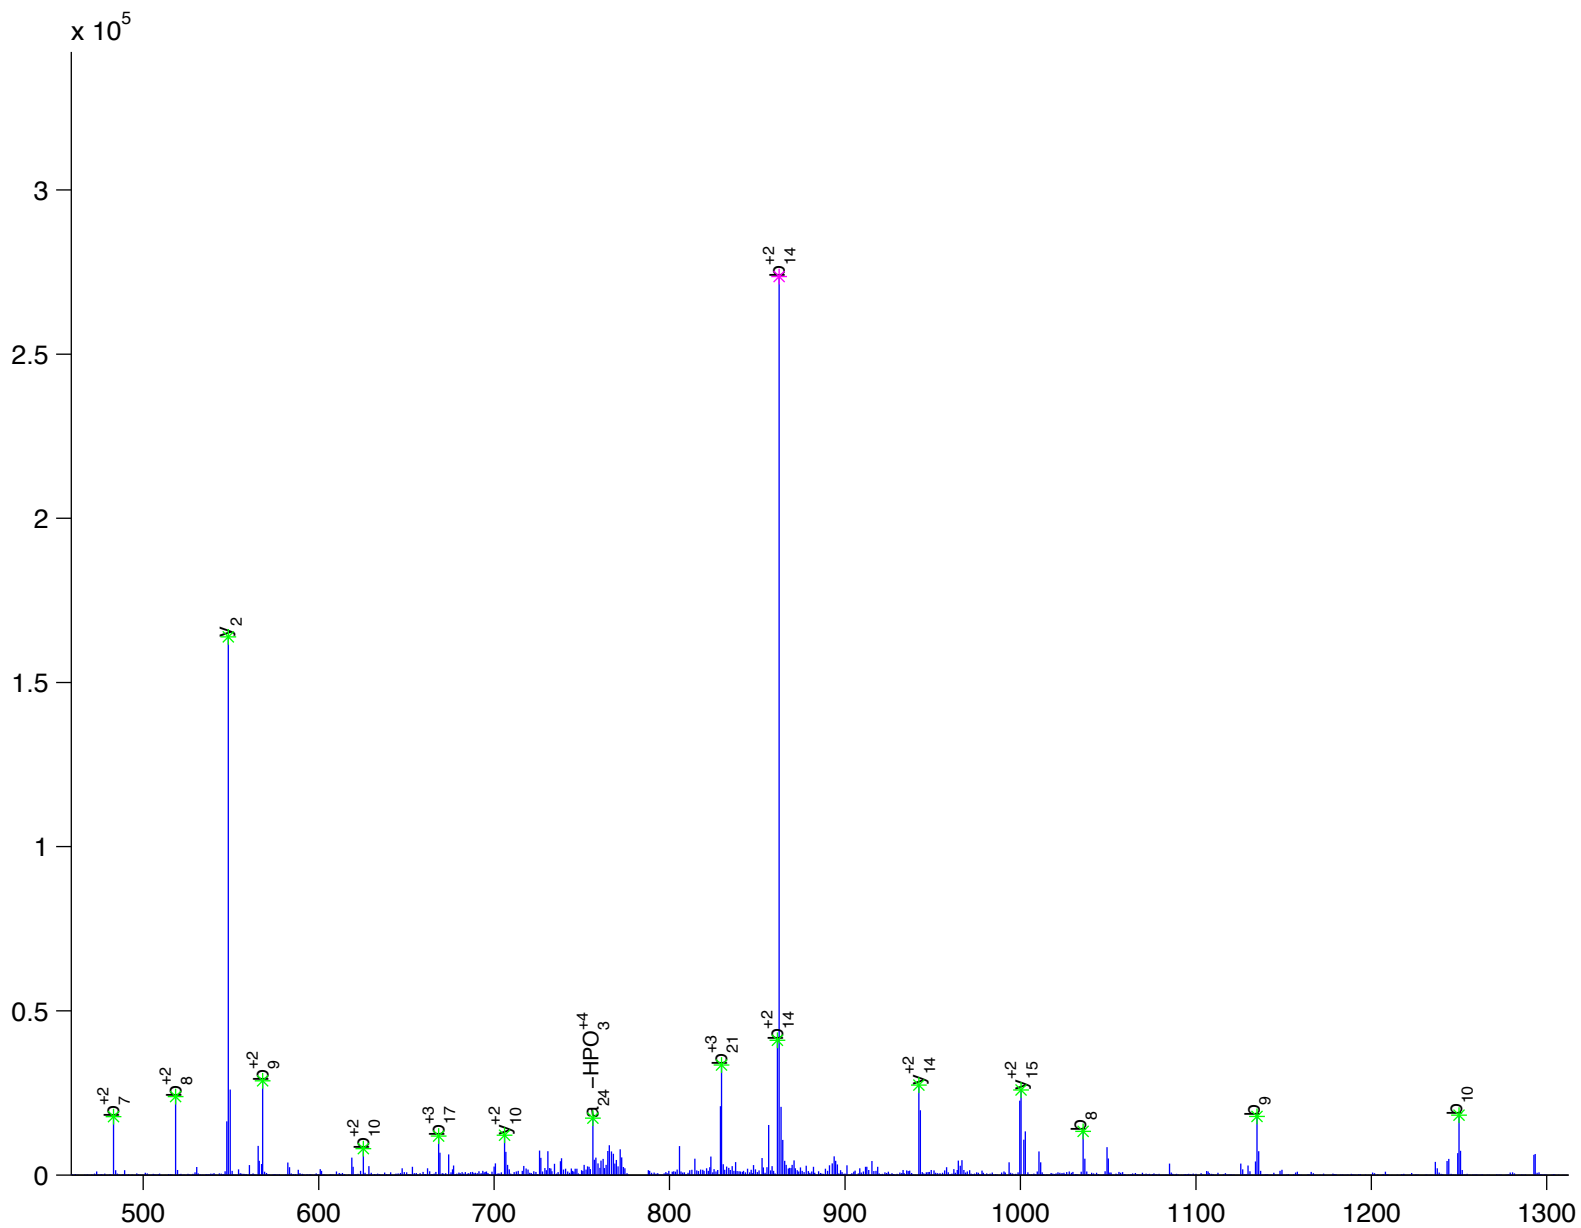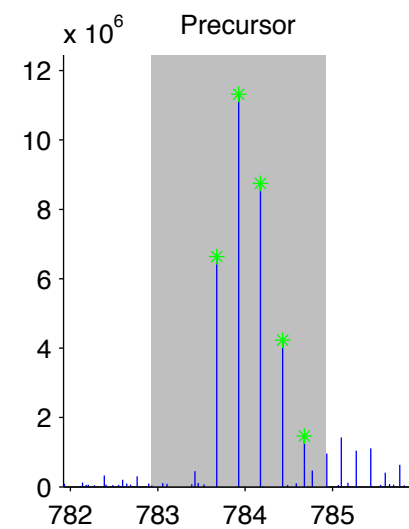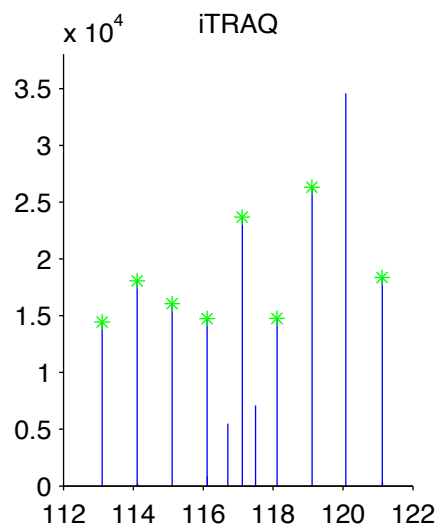

A [ A ] [ N ] [ E ] [ A ] [ G ] y [ F ] [ N ] [ E ] [ E ] [ M ] [ A ] [ P ] [ I ] [ E ] [ V ] K

acetyl-Coenzyme A acyltransferase 2 (mitochondrial 3-oxoacyl-Coenzyme A thiolase)

Charge State: +3

Scan Number: 5587

File Name: 100905ptp1blivers\_ncHFD\_basal.raw

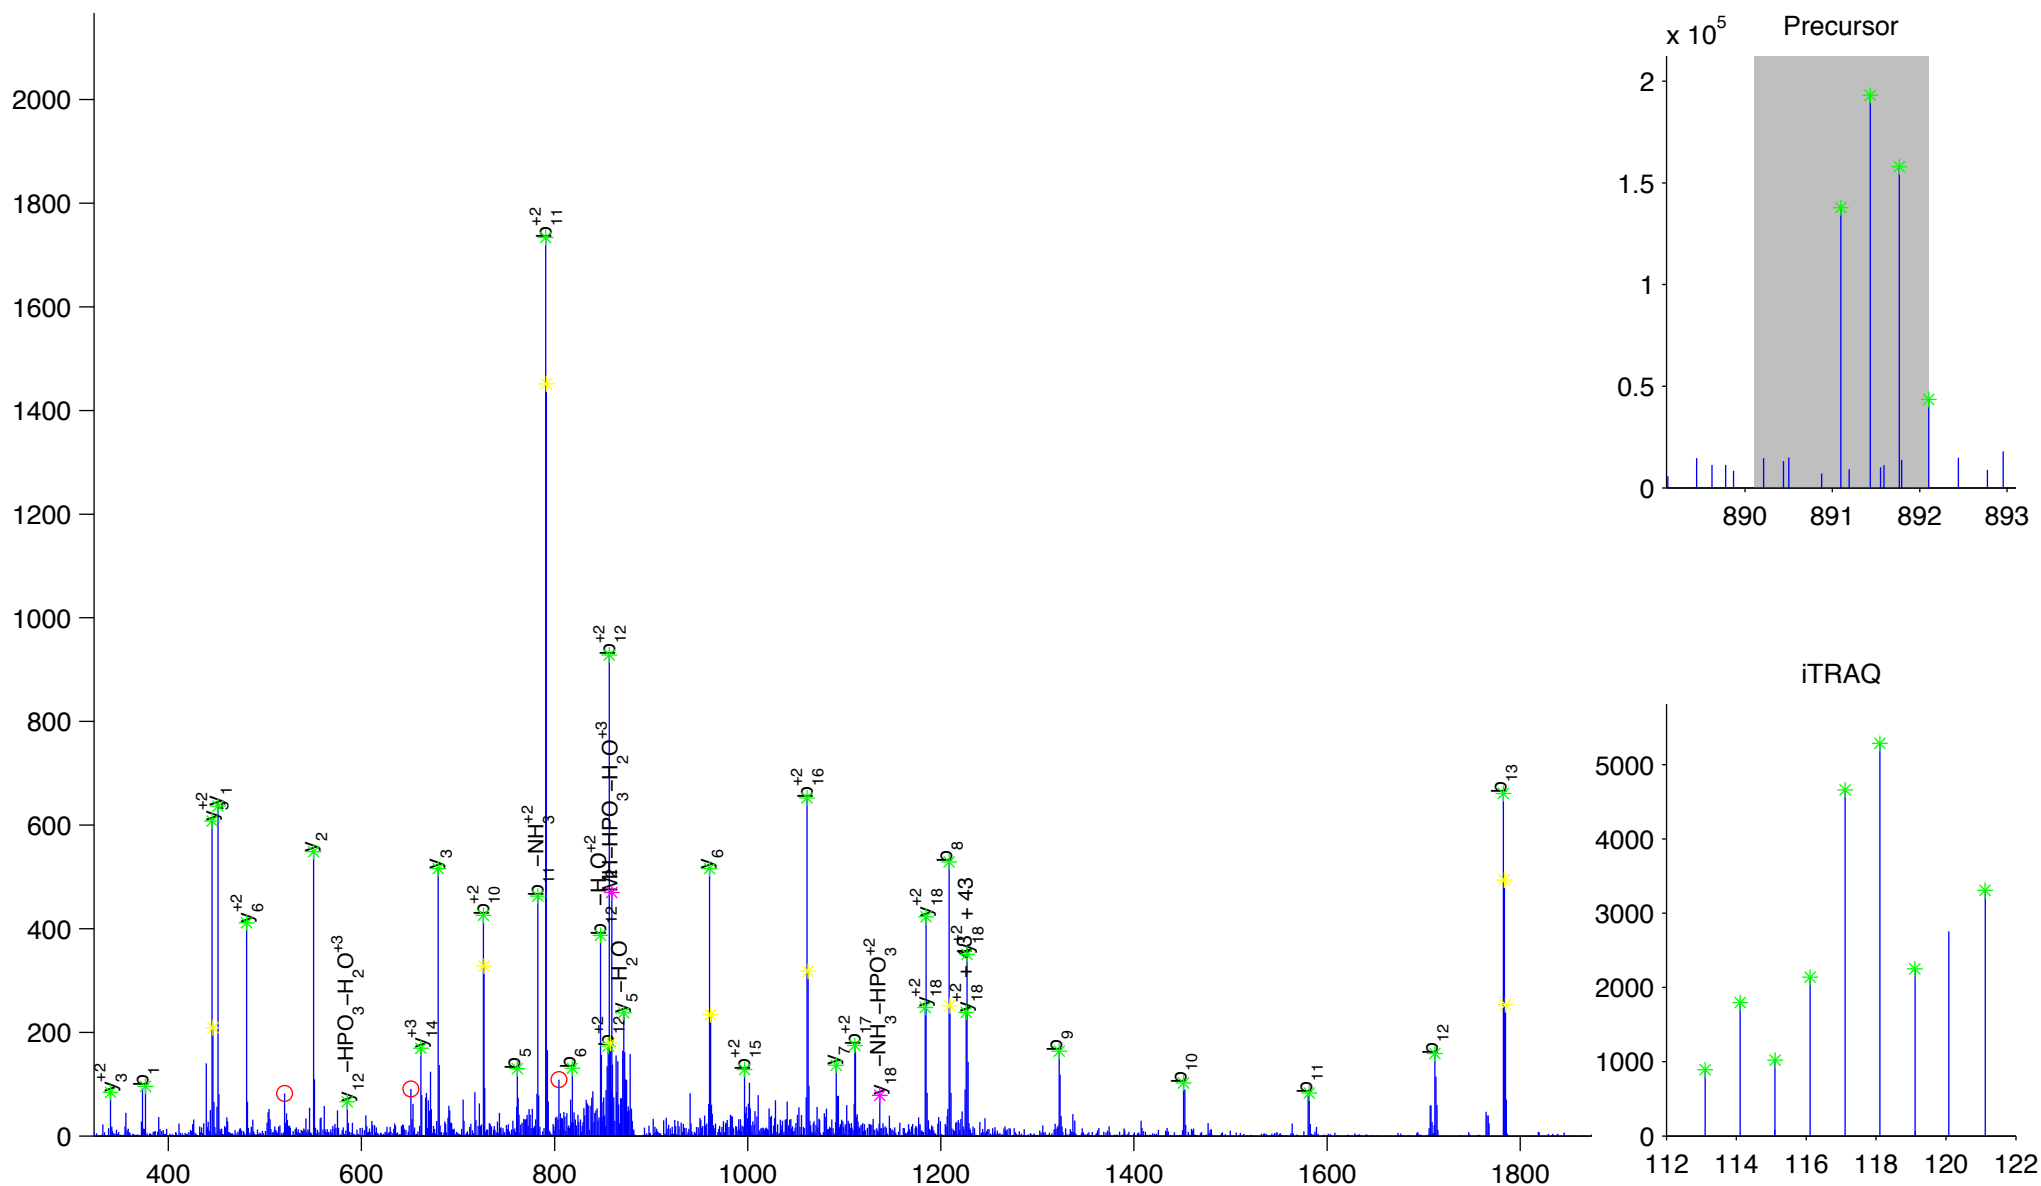

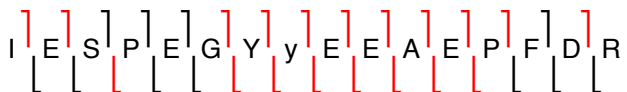

actin filament associated protein 1-like 2

Charge State: +3

Scan Number: 4975

File Name: 090728ptp1blivers\_M\_NC\_ins\_e.raw

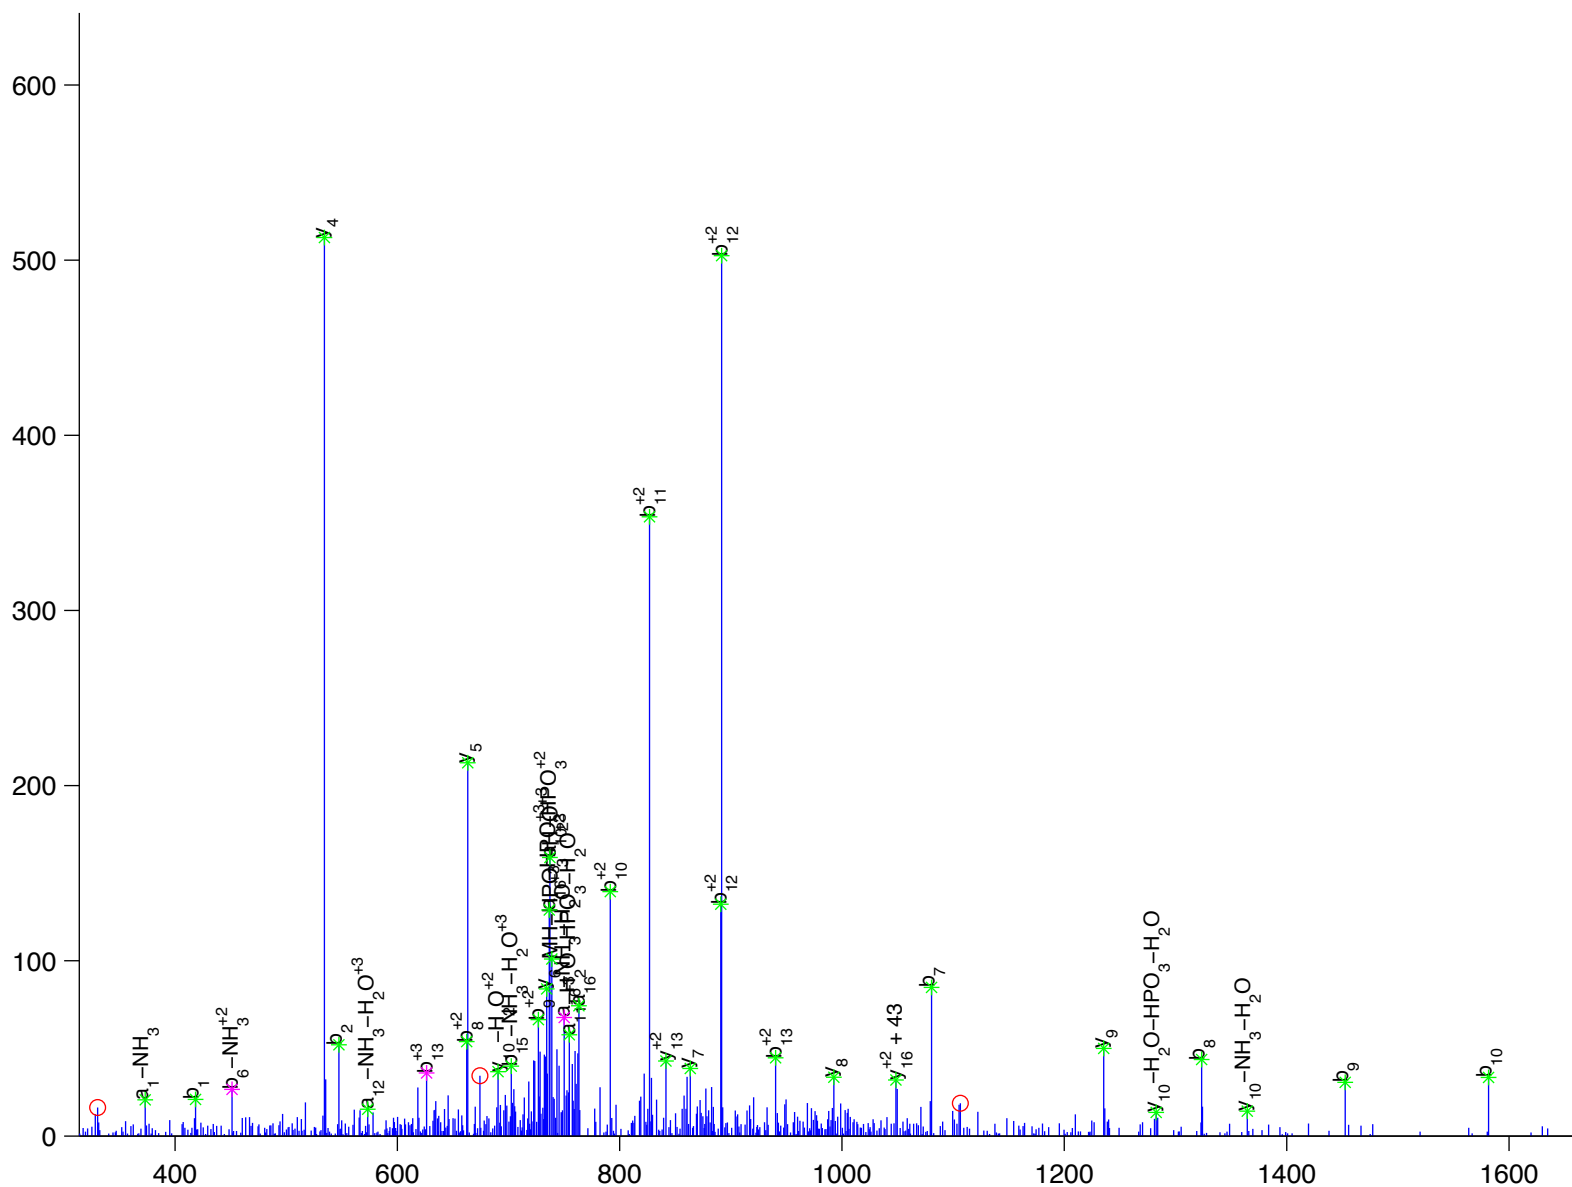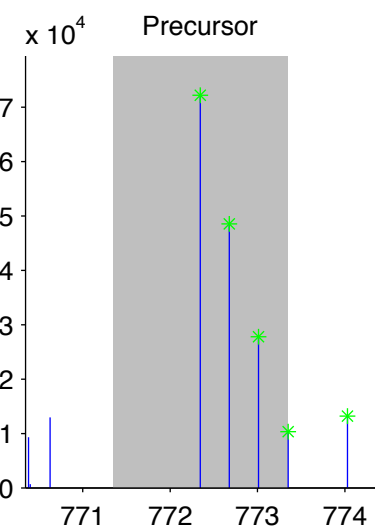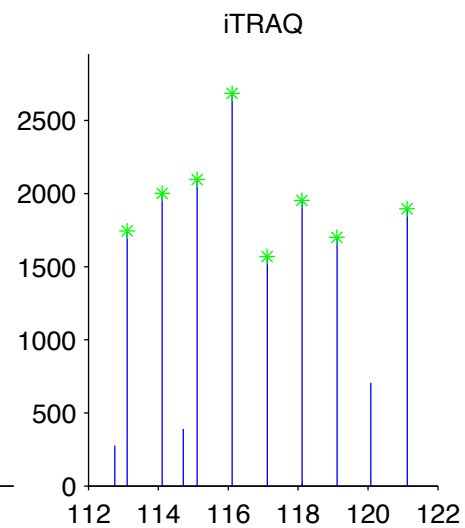

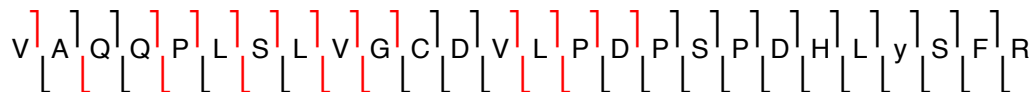

actin filament associated protein 1-like 2

Charge State: +4

Scan Number: 9630

File Name: 0090807ptp1blivers\_M\_HFD2.raw

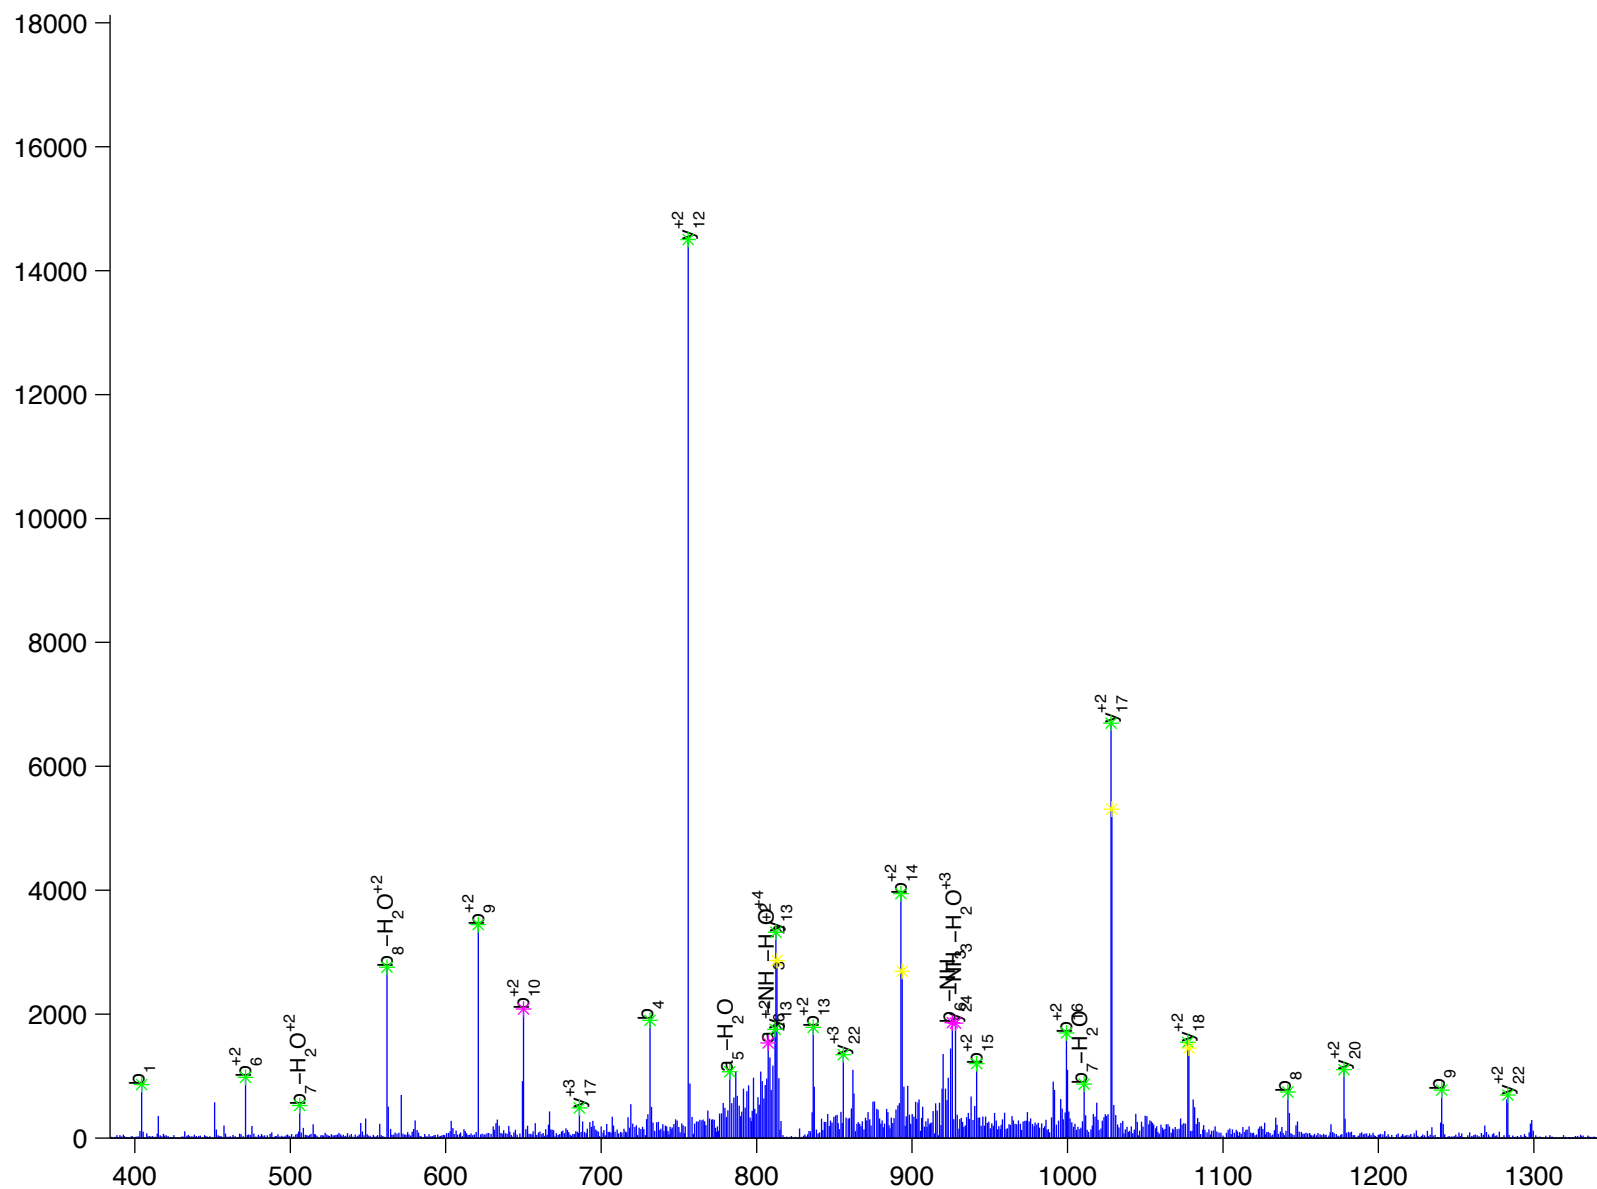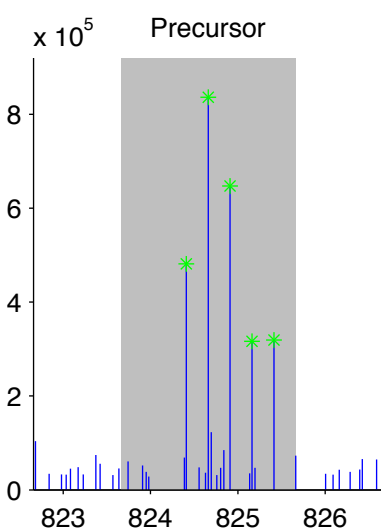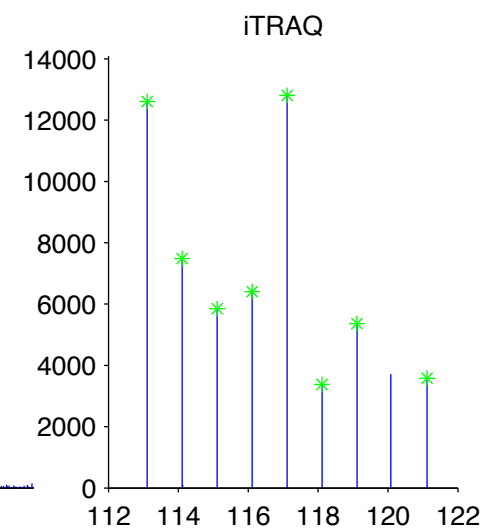

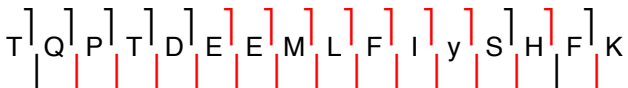

acyl-CoA binding protein / diazepam binding inhibitor isoform 2

Charge State: +4

Scan Number: 3149

File Name: HJ072909\_HFD\_E1\_2.raw

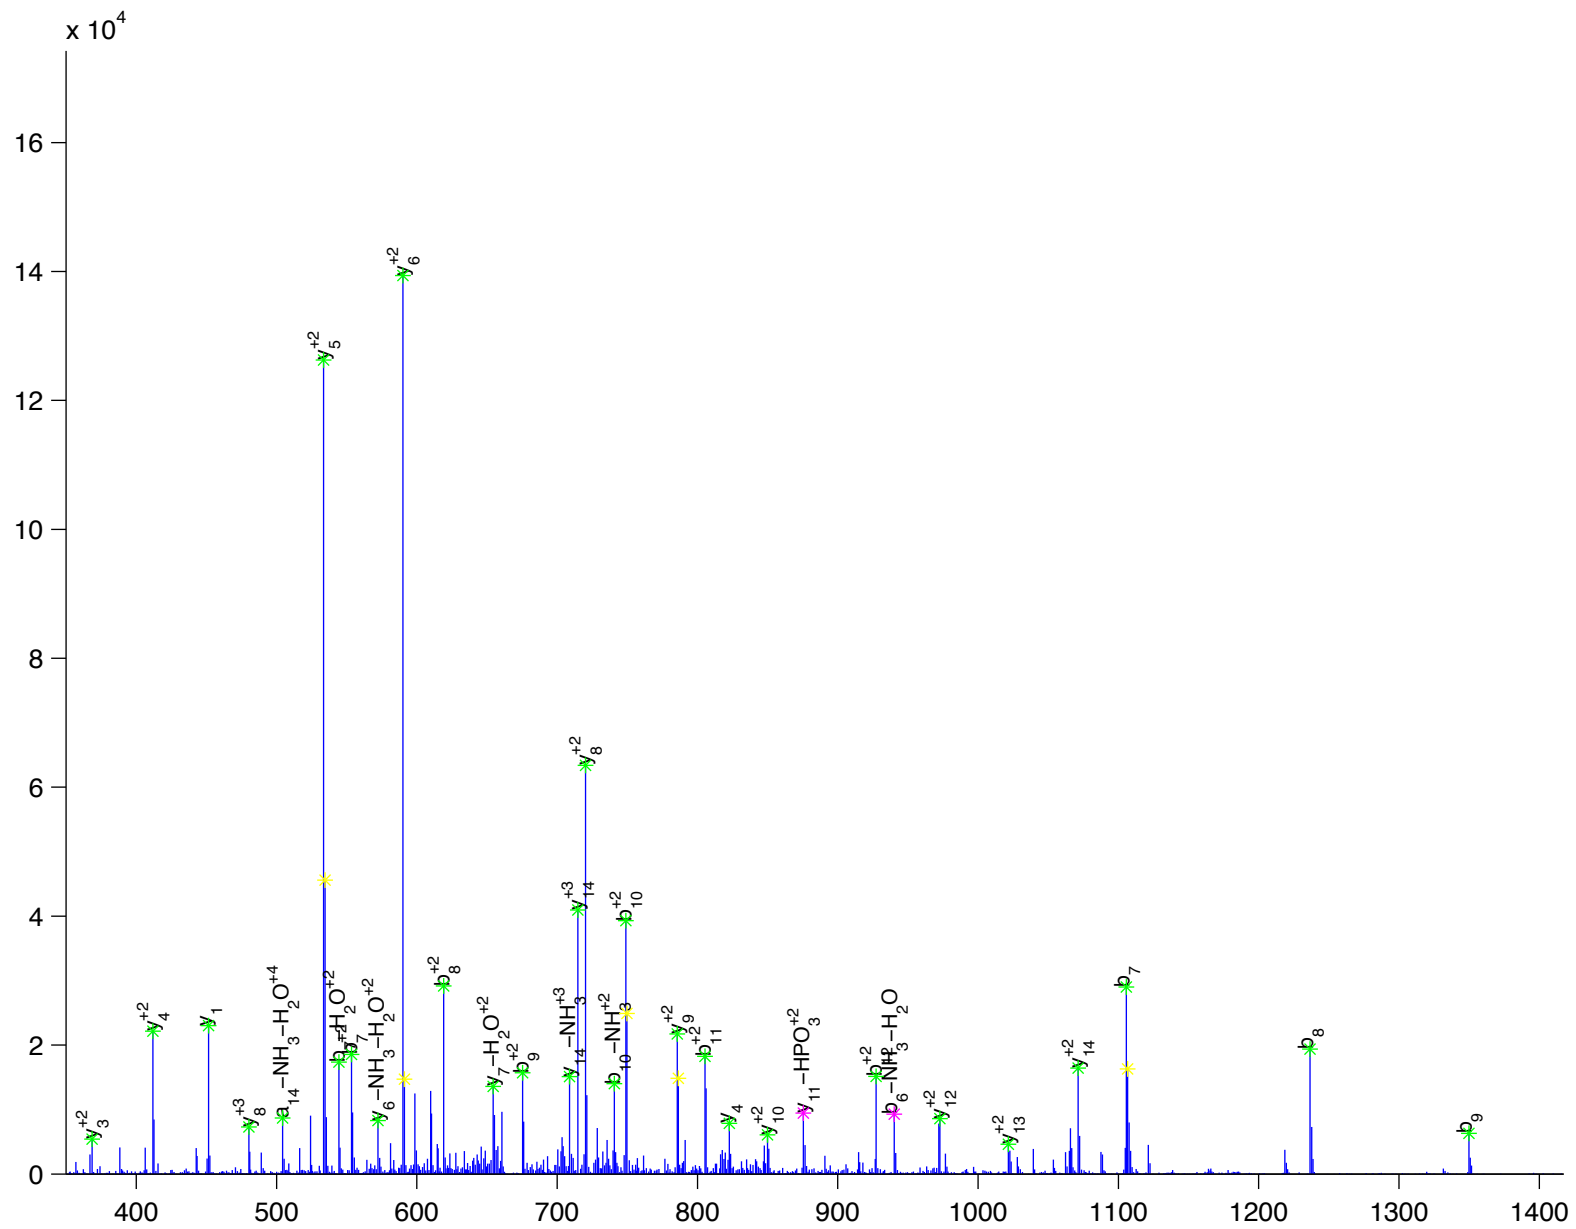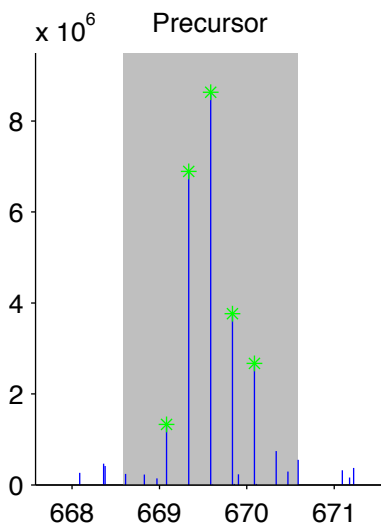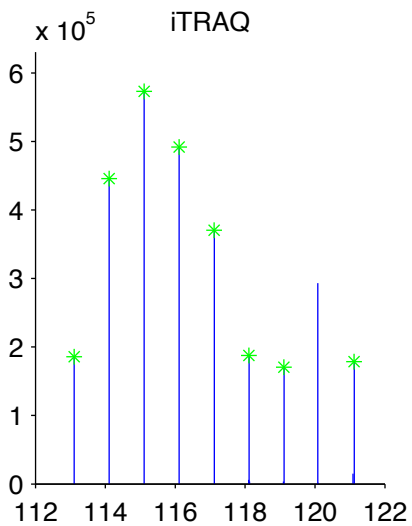

L [ K ] T [ Q ] P [ T ] D [ E ] E [ M ] L [ F ] I [ y ] S [ H ] F [ K ]

acyl-CoA binding protein / diazepam binding inhibitor isoform 2

Charge State: +4

Scan Number: 9399

File Name: 090807ptp1blivers\_M\_HFD\_basal.raw

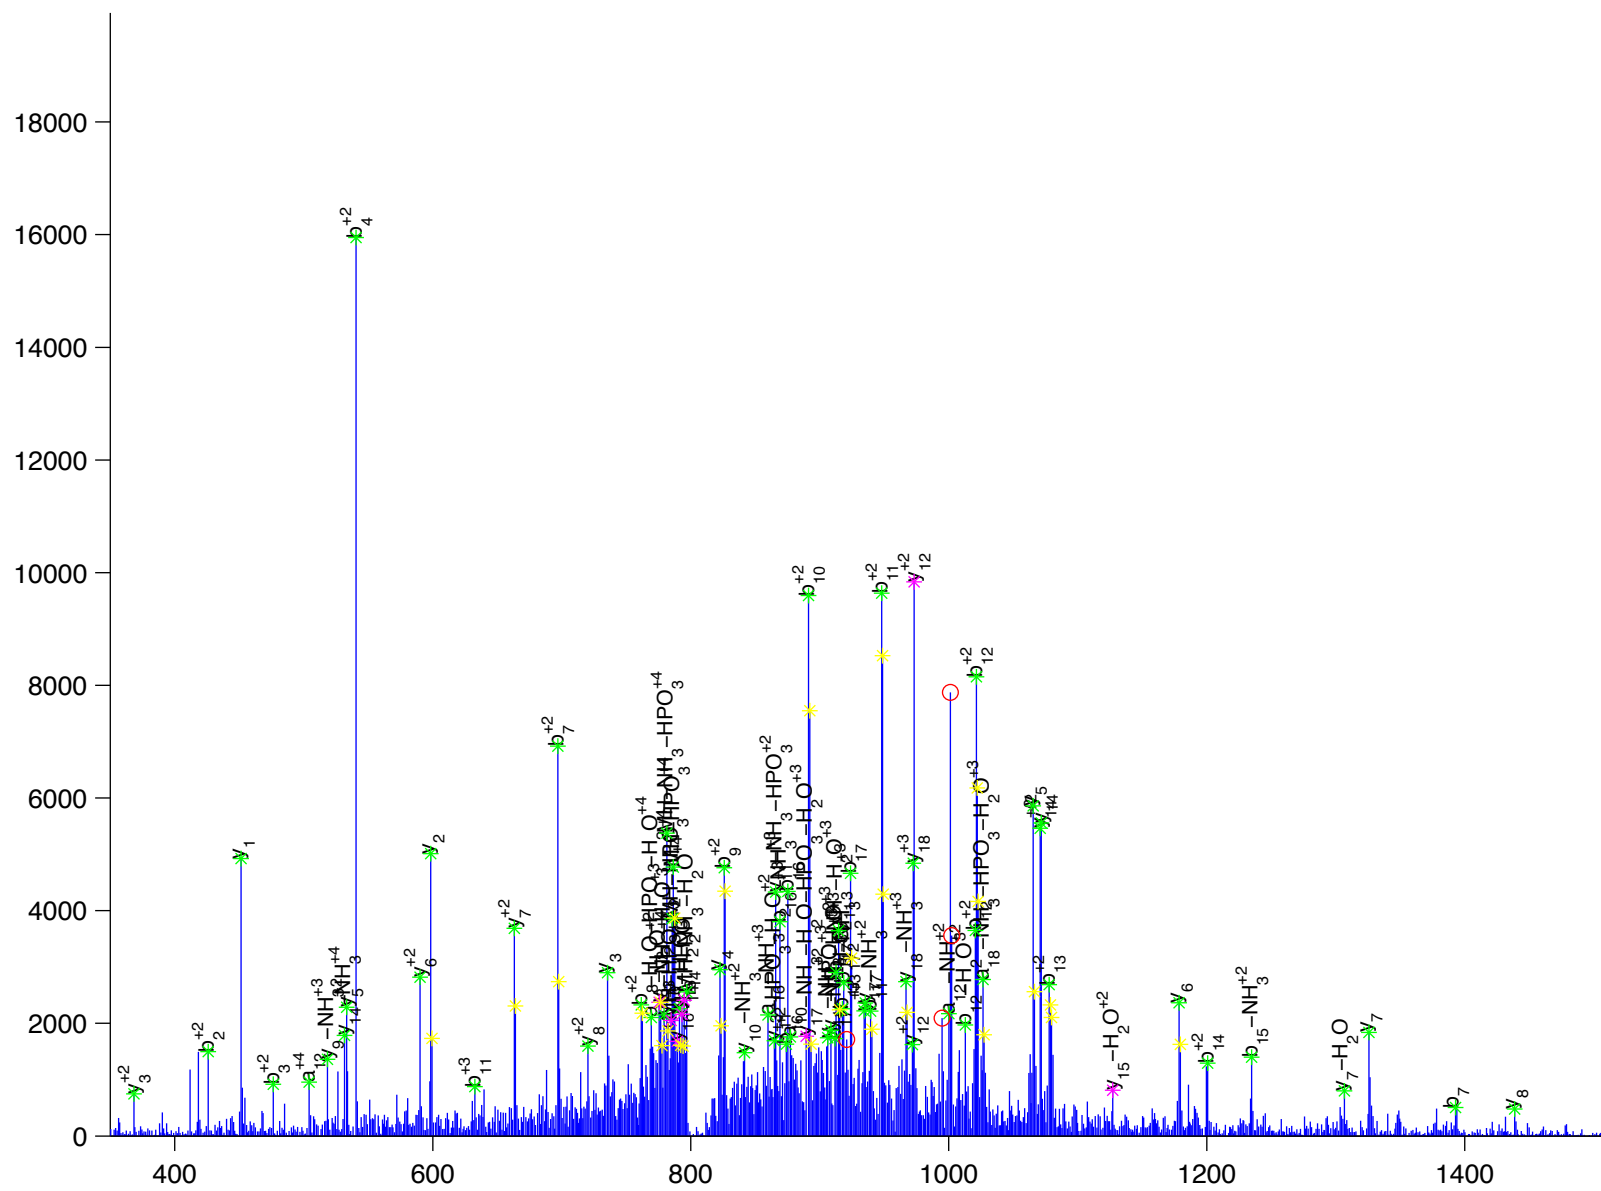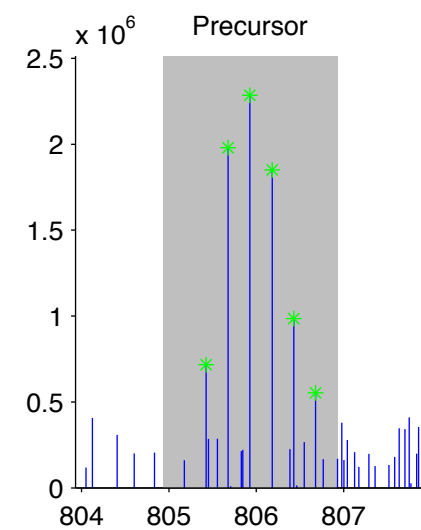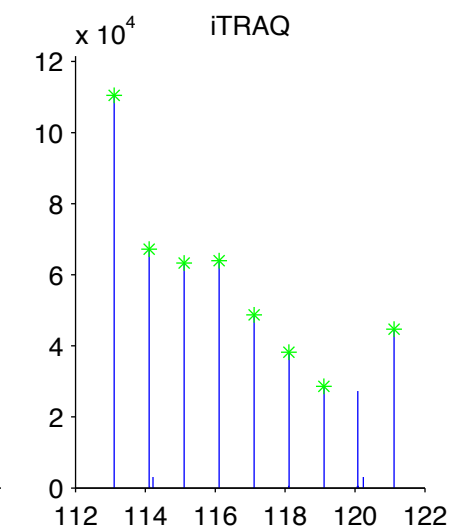

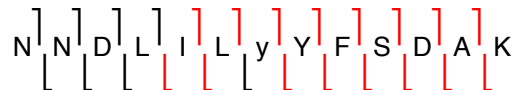

acyl-CoA synthetase long-chain family member 5  
Charge State: +3  
Scan Number: 6914  
File Name: 100905ptp1blivers\_ncHFD\_basal.raw

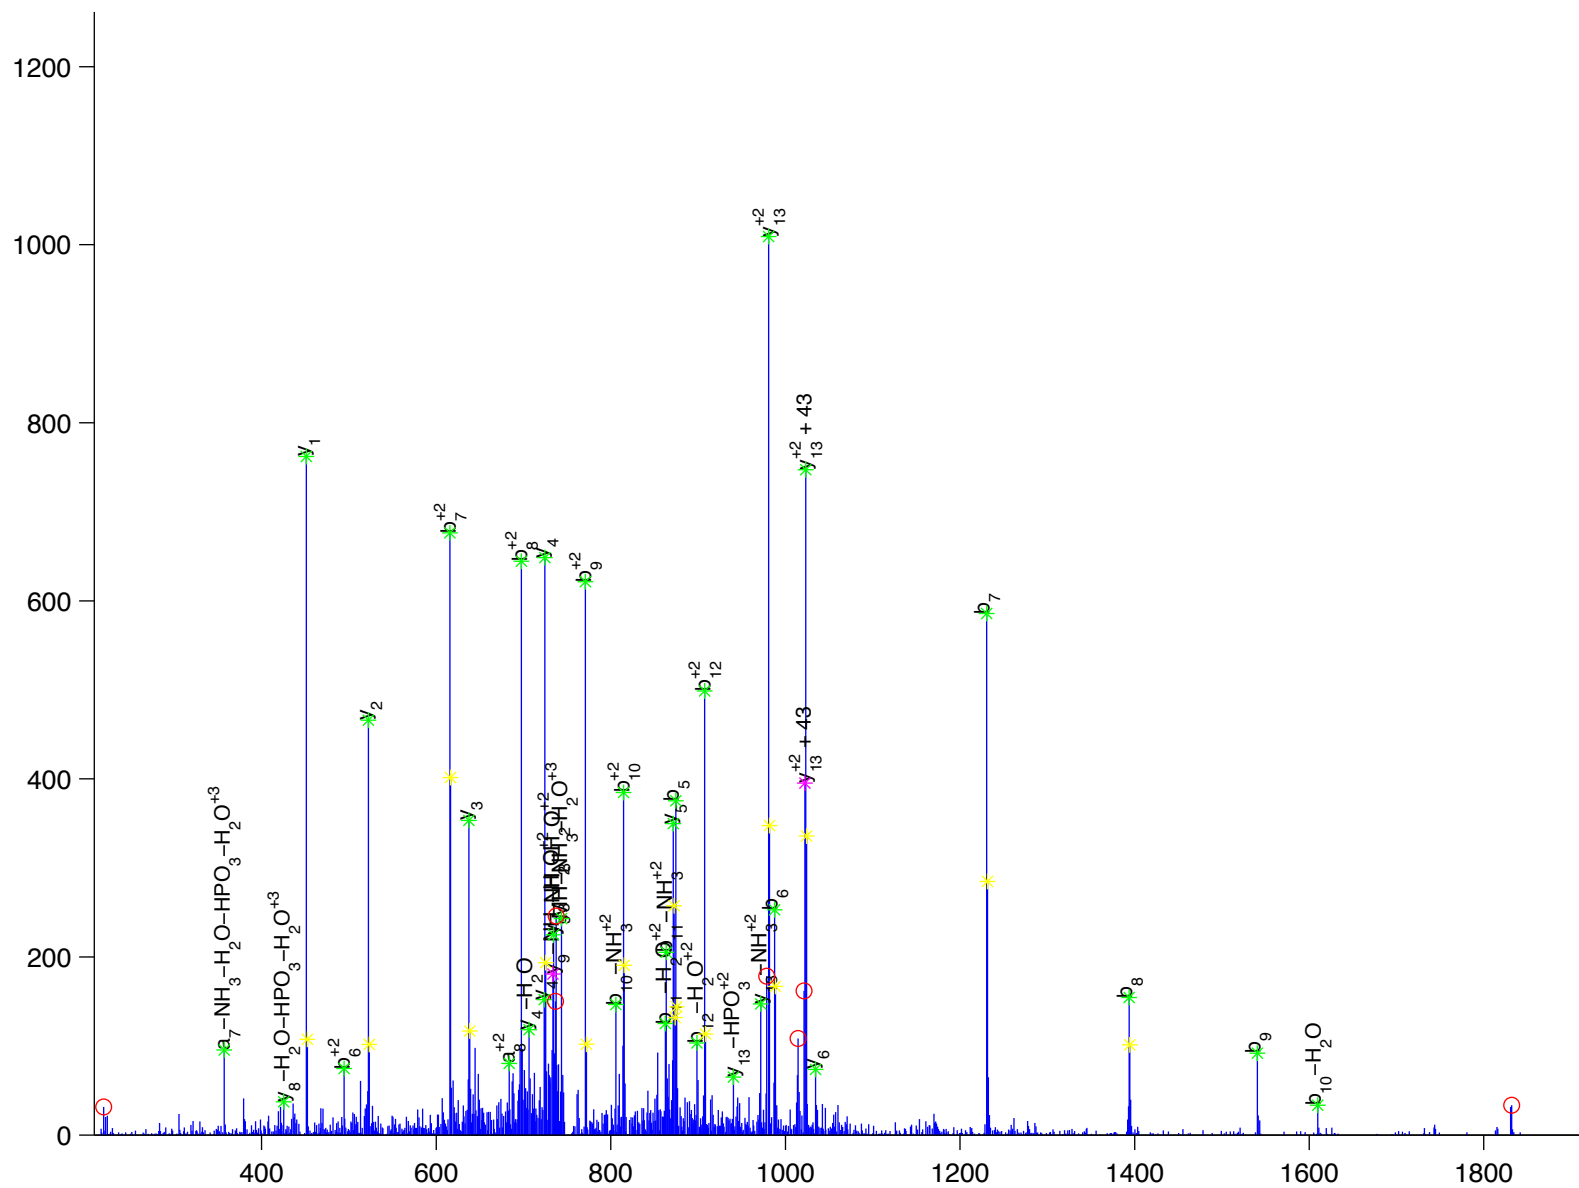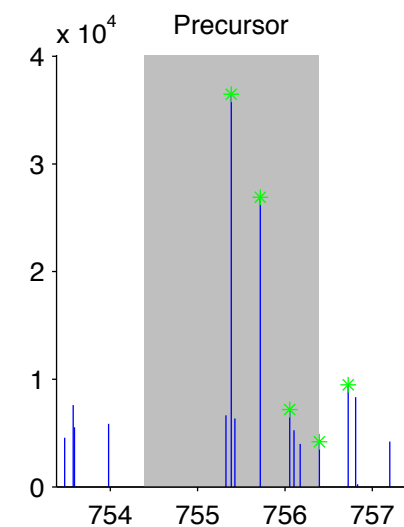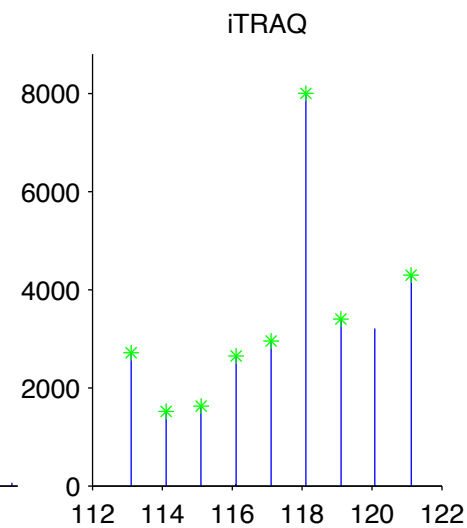



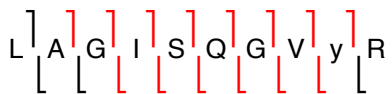

acyl-Coenzyme A dehydrogenase family, member 11

Charge State: +3

Scan Number: 5751

File Name: 091130ptp1blivers\_hfd\_basal2.raw

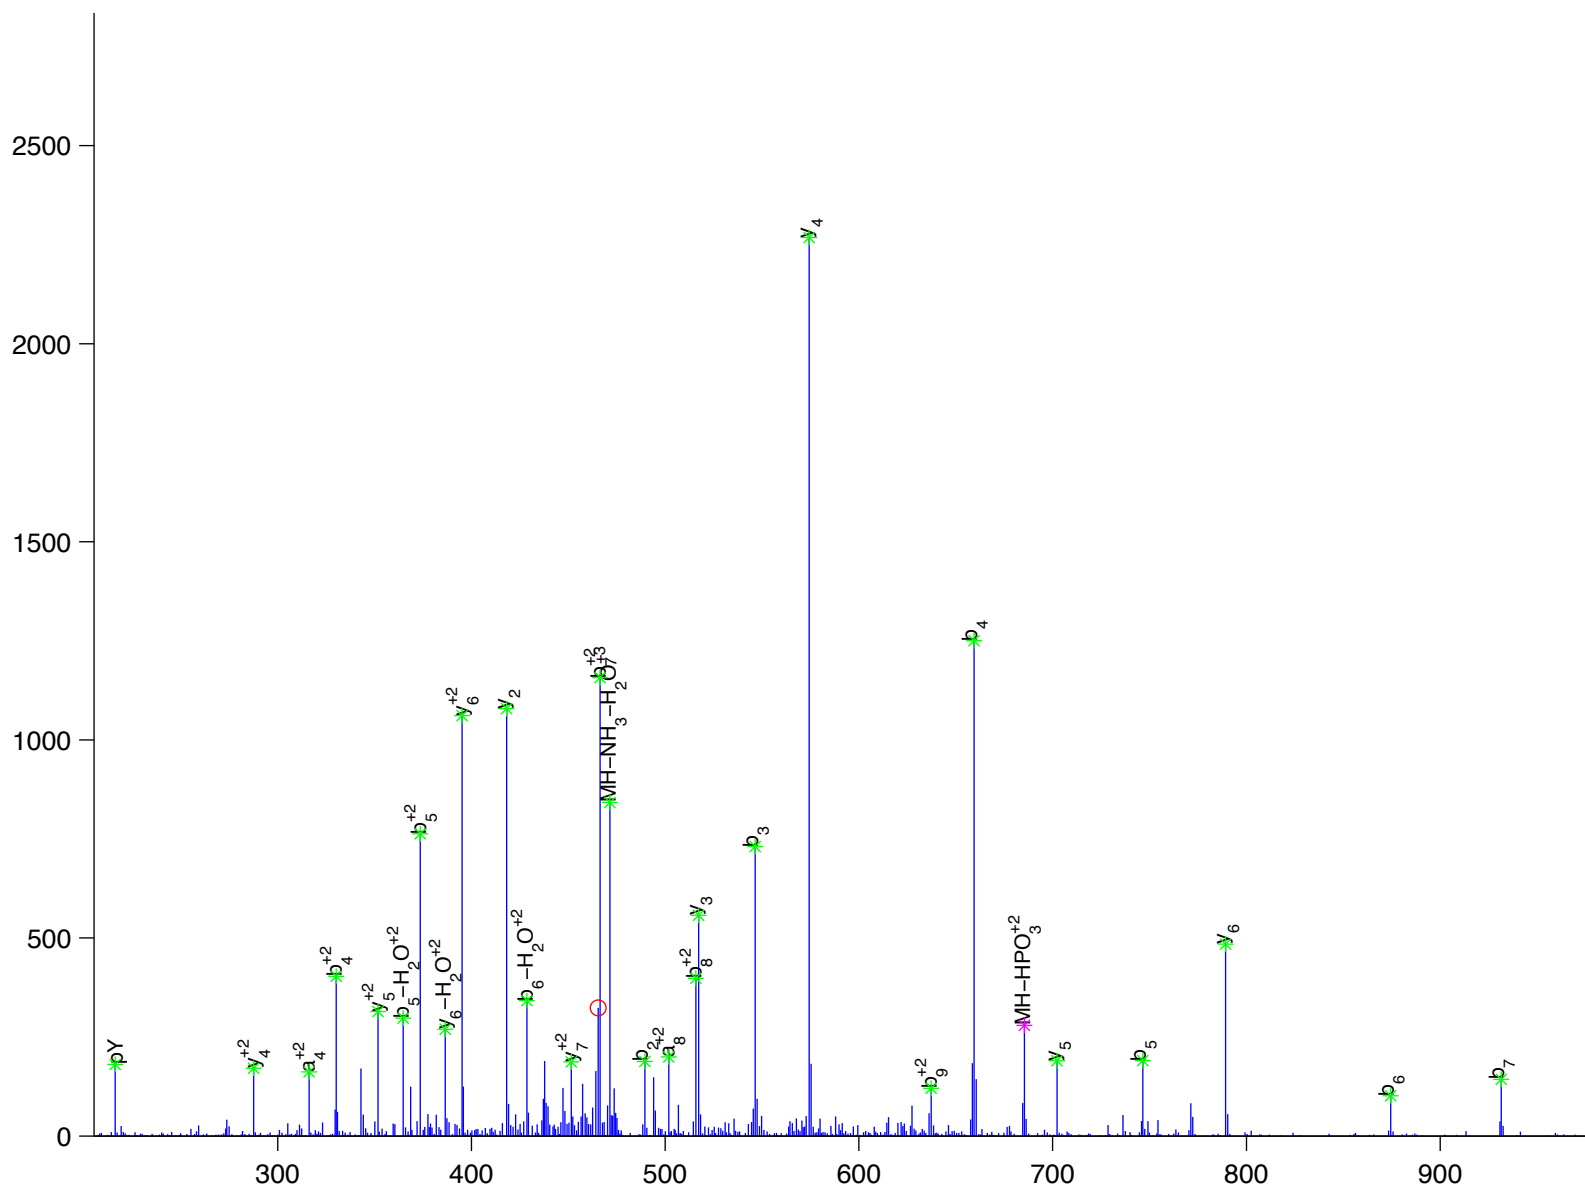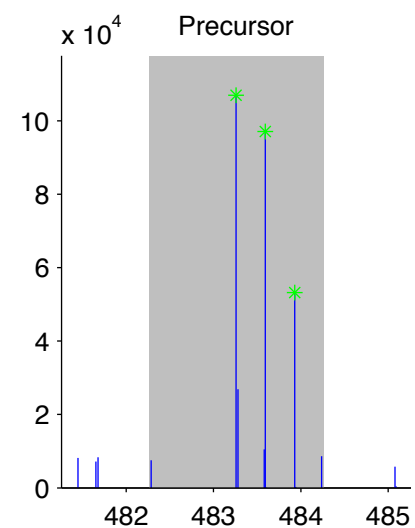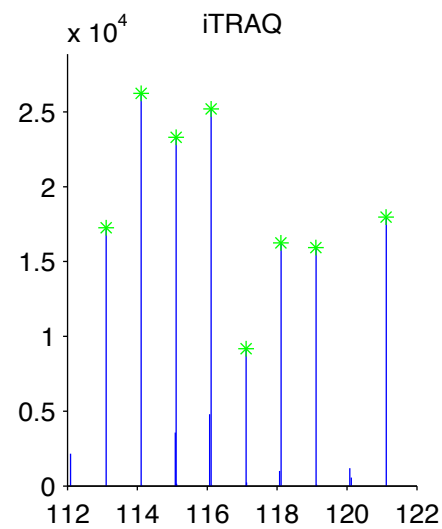

Y<sup>1</sup>D<sup>2</sup>G<sup>3</sup>N<sup>4</sup>V<sup>5</sup>y<sup>6</sup>E<sup>7</sup>N<sup>8</sup>L<sup>9</sup>F<sup>10</sup>E<sup>11</sup>W<sup>12</sup>A<sup>13</sup>K<sup>14</sup>

acyl-Coenzyme A oxidase 1, palmitoyl

Charge State: +3

Scan Number: 6949

File Name: 090728ptp1blivers\_M\_NC\_ins\_e.raw

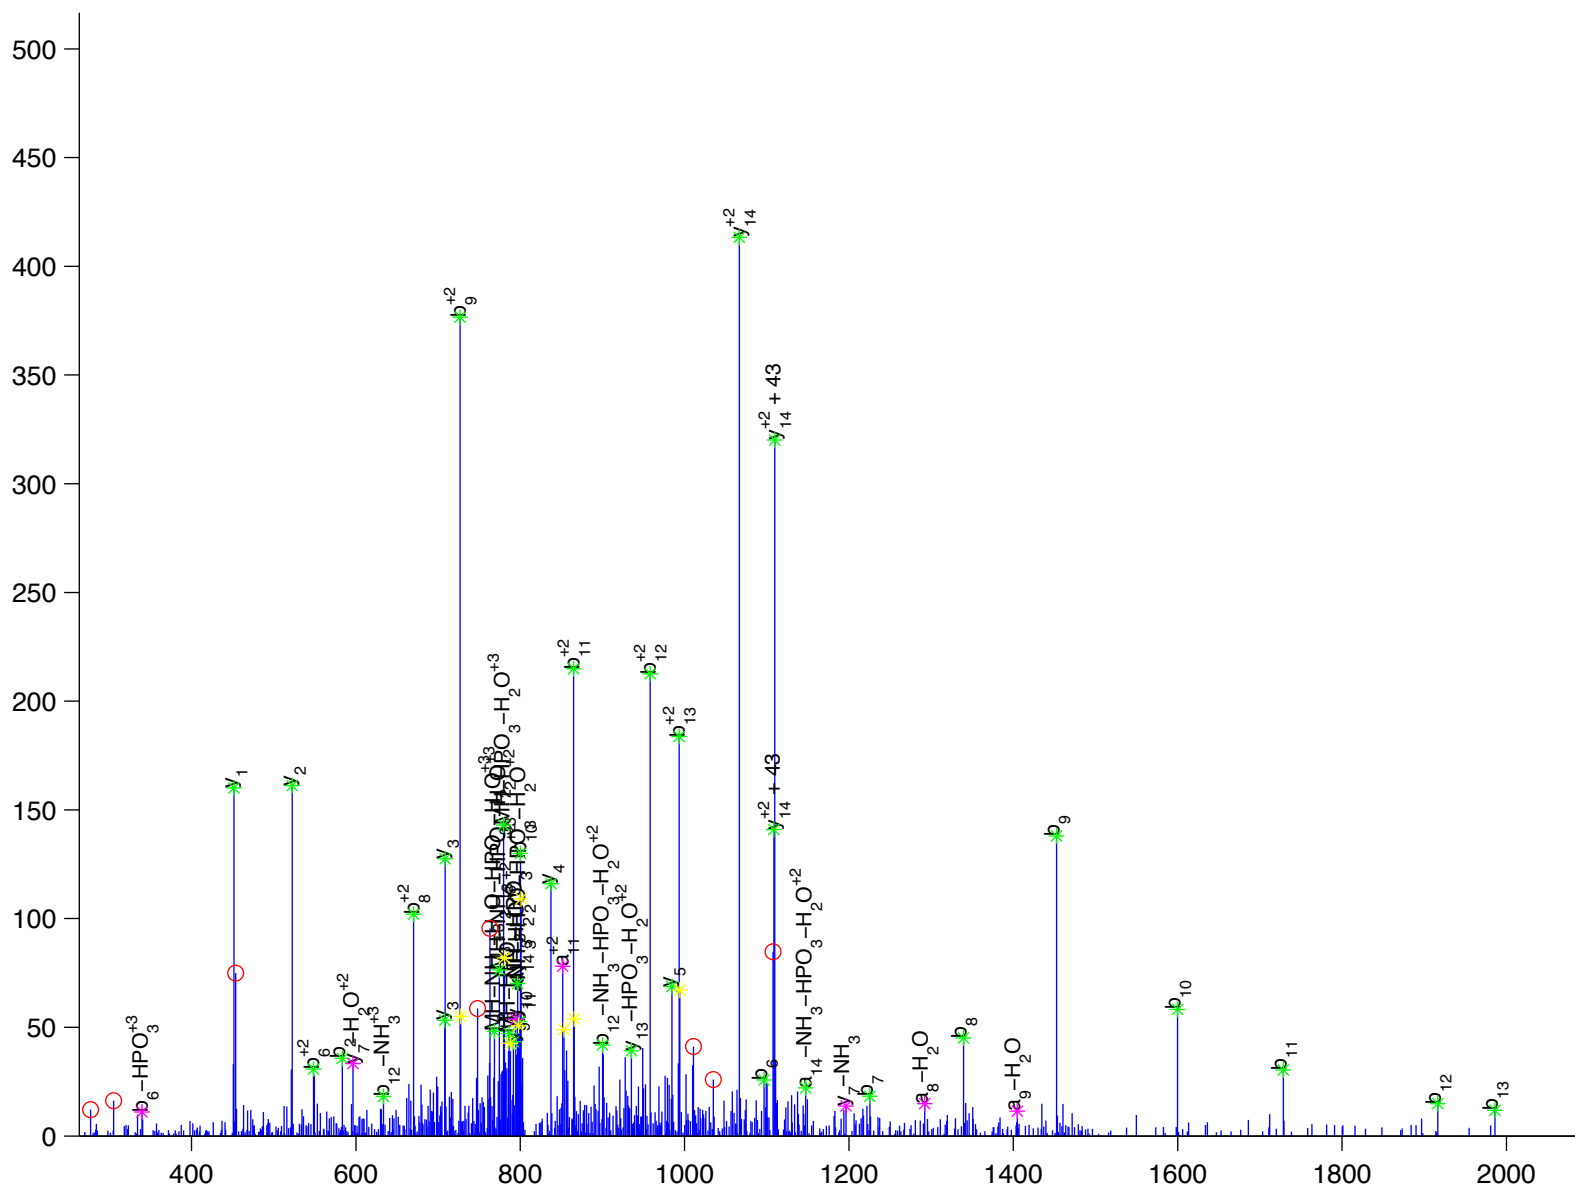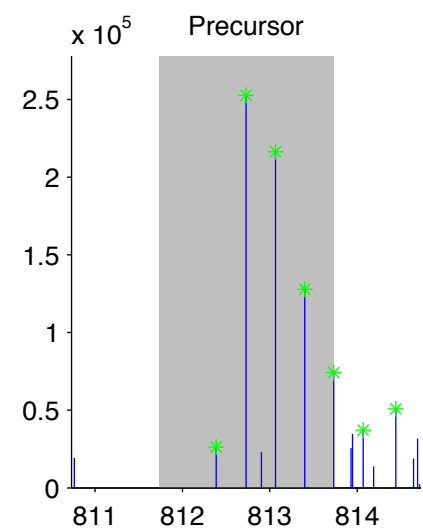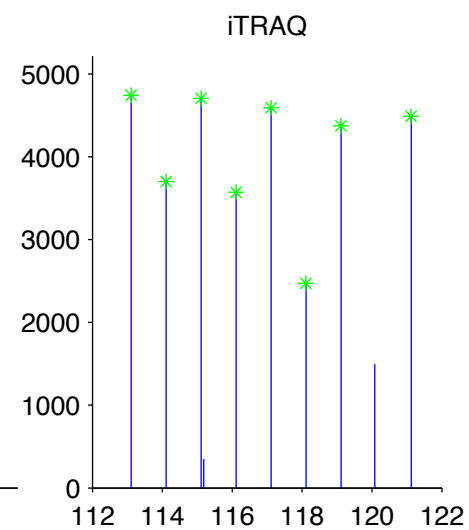

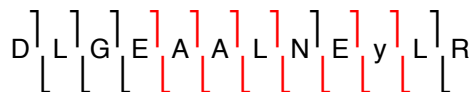

aldehyde dehydrogenase 1 family, member L1

Charge State: +3

Scan Number: 4593

File Name: 100827ptp1blivers\_ncHFD\_basal.raw

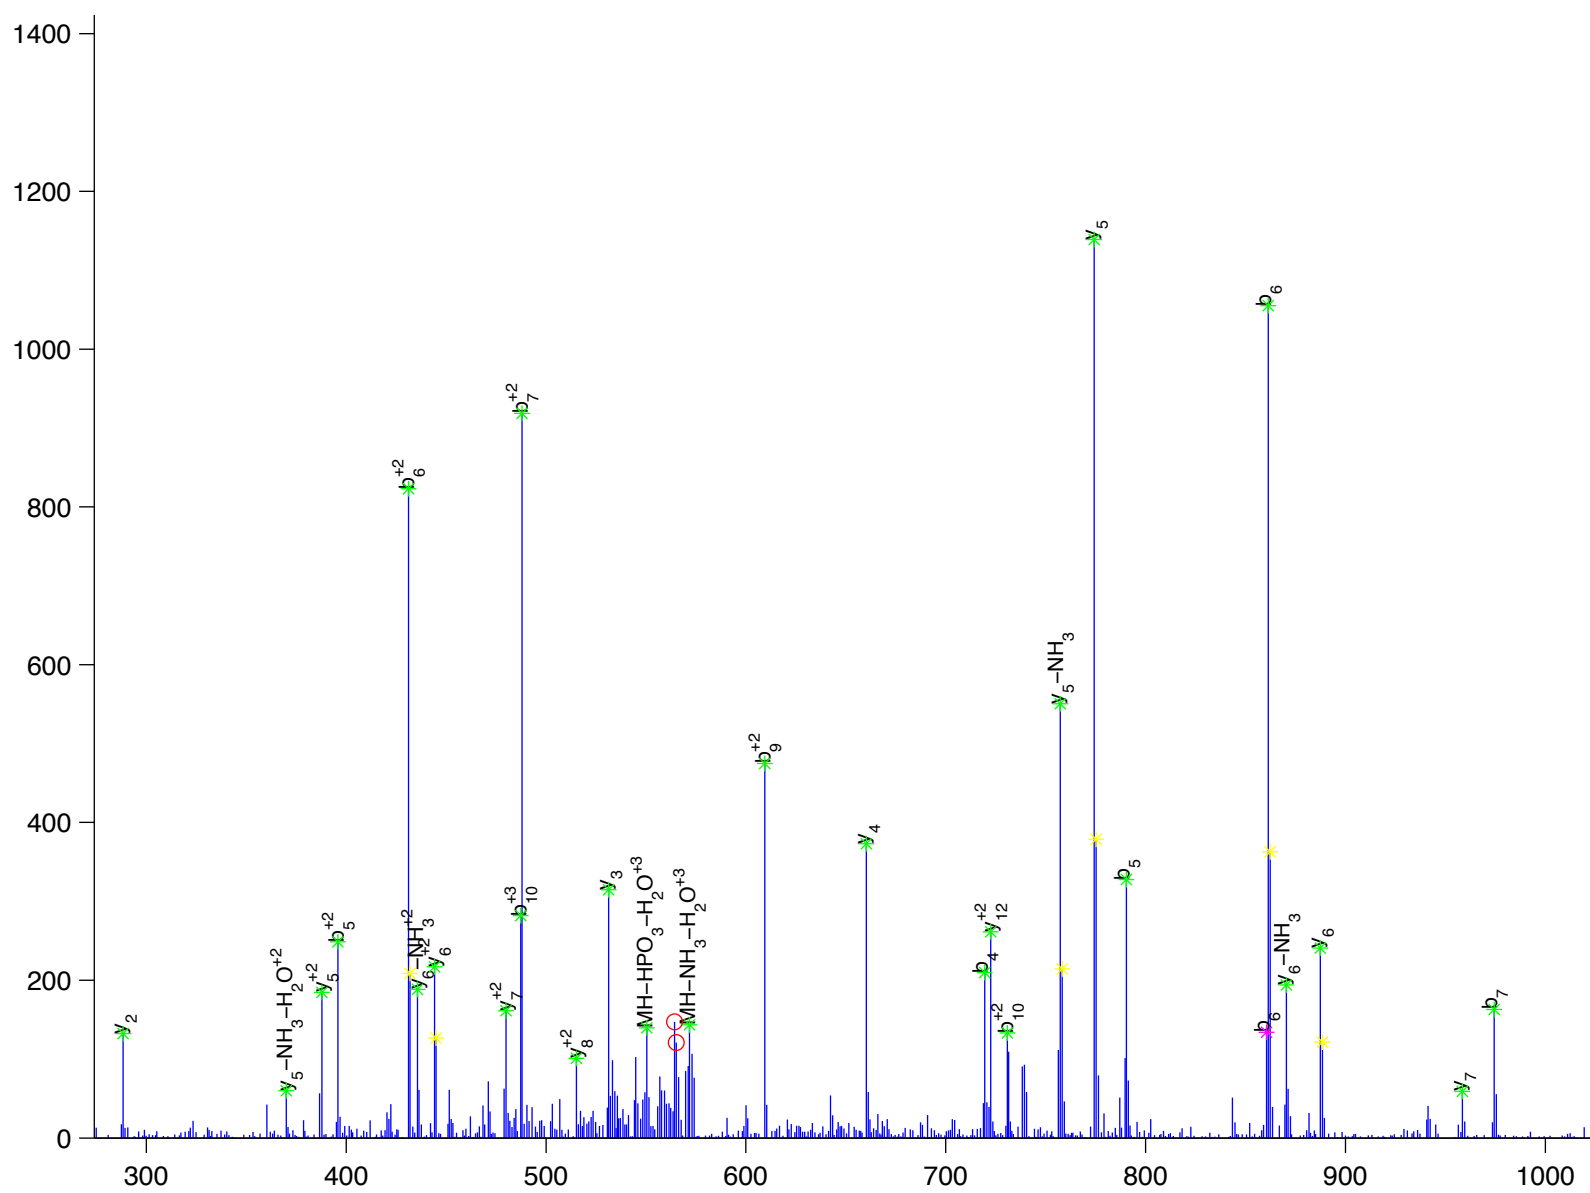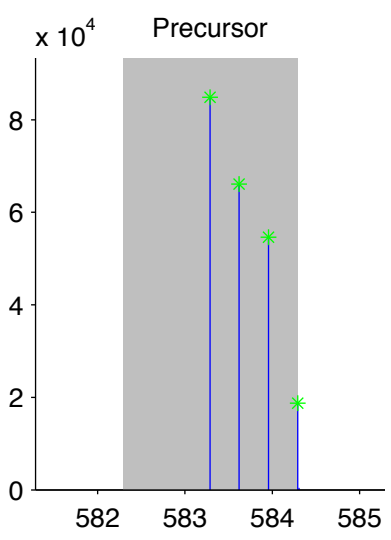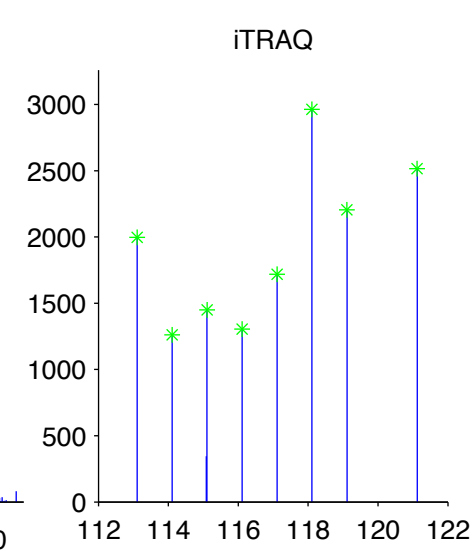

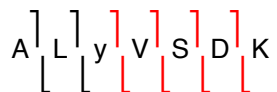

aldehyde dehydrogenase 1 family, member L1  
Charge State: +3  
Scan Number: 4756  
File Name: 091130ptp1blivers\_hfd\_basal2.raw

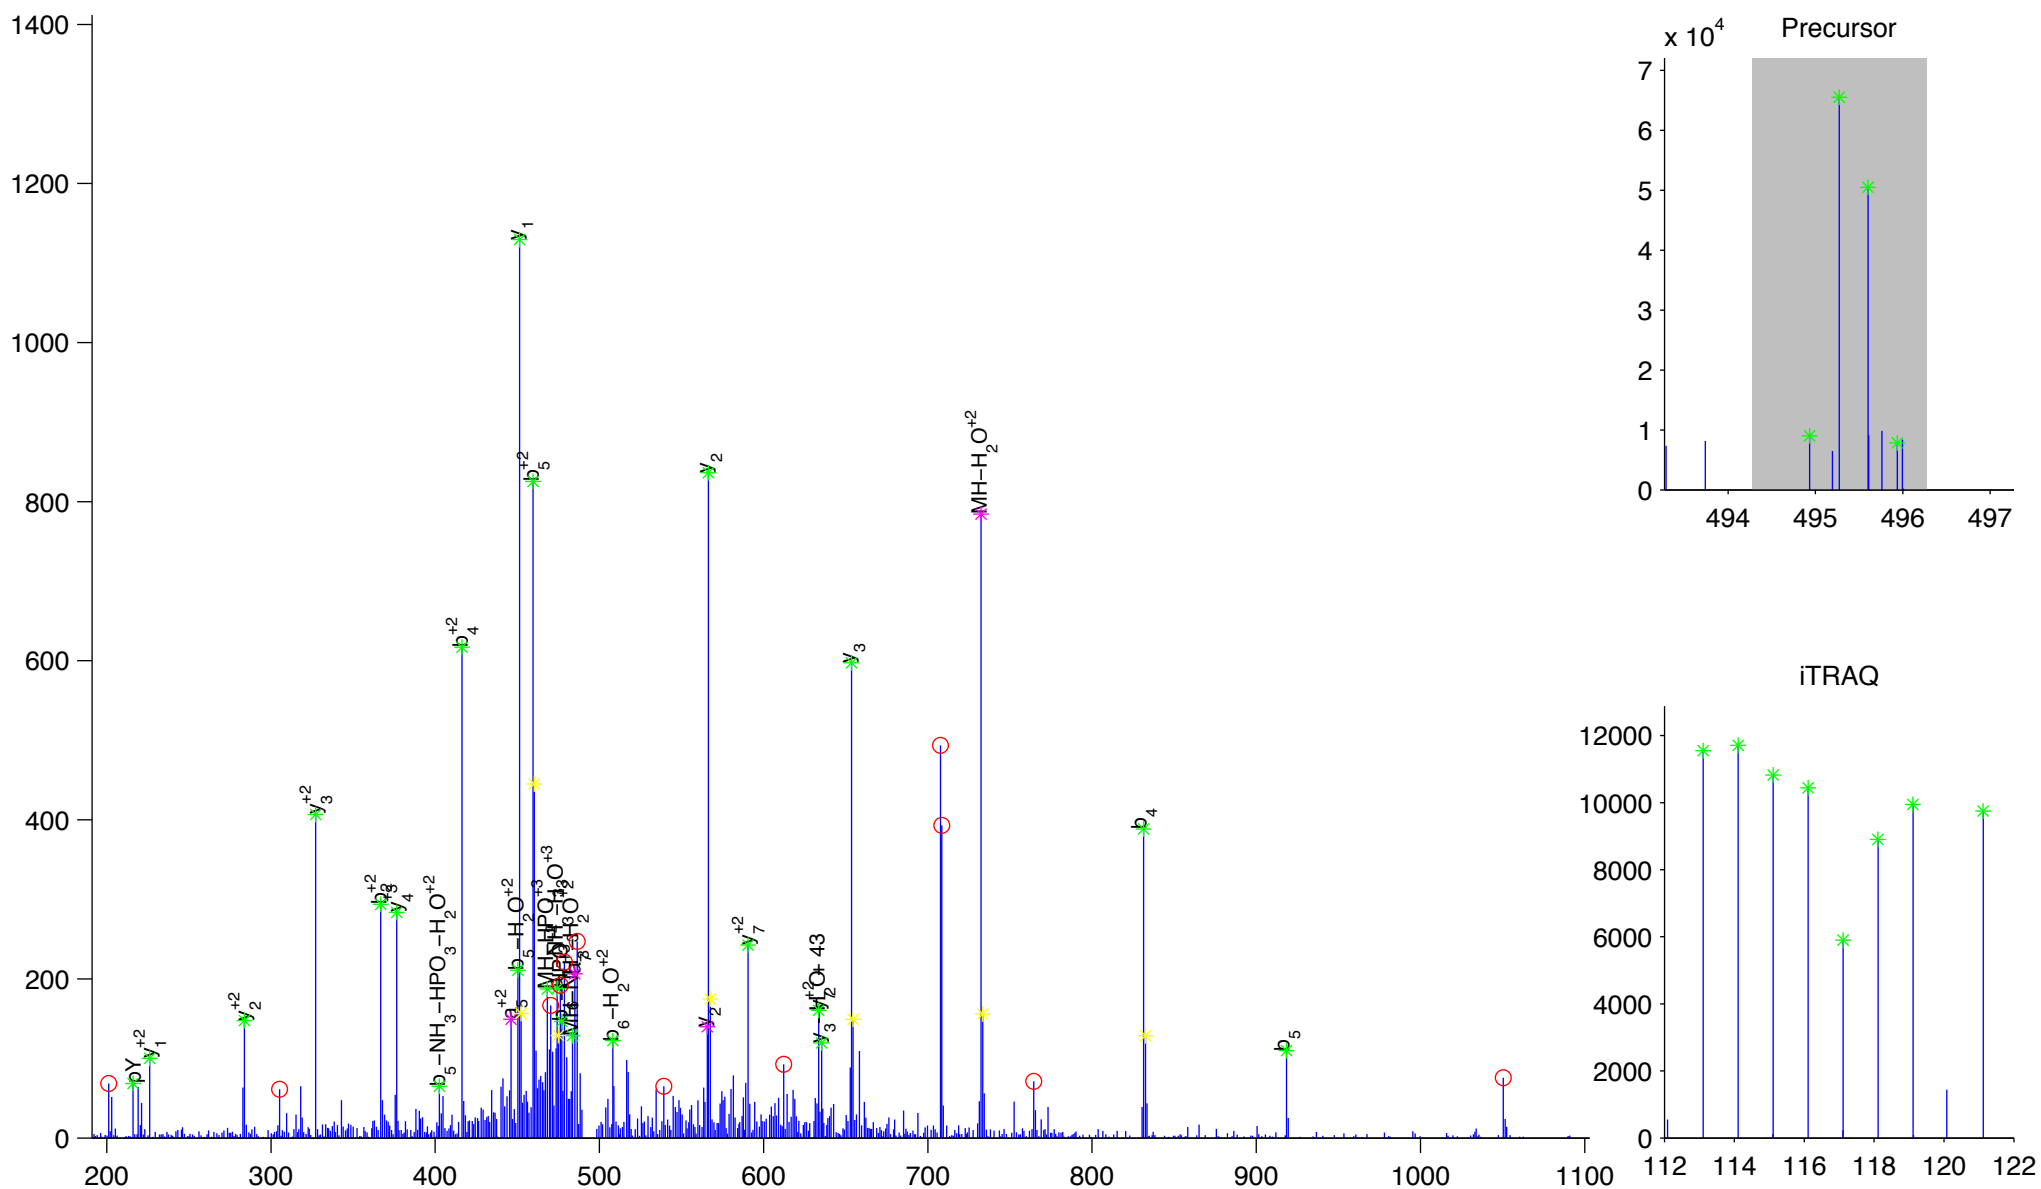

E [ L ] [ G ] [ E ] [ H ] [ G ] [ L ] [ y ] [ E ] [ Y ] [ T ] [ E ] [ L ] [ K ]

aldehyde dehydrogenase family 1, subfamily A7

Charge State: +3

Scan Number: 1325

File Name: HJ072909\_HFD\_E1\_2.raw

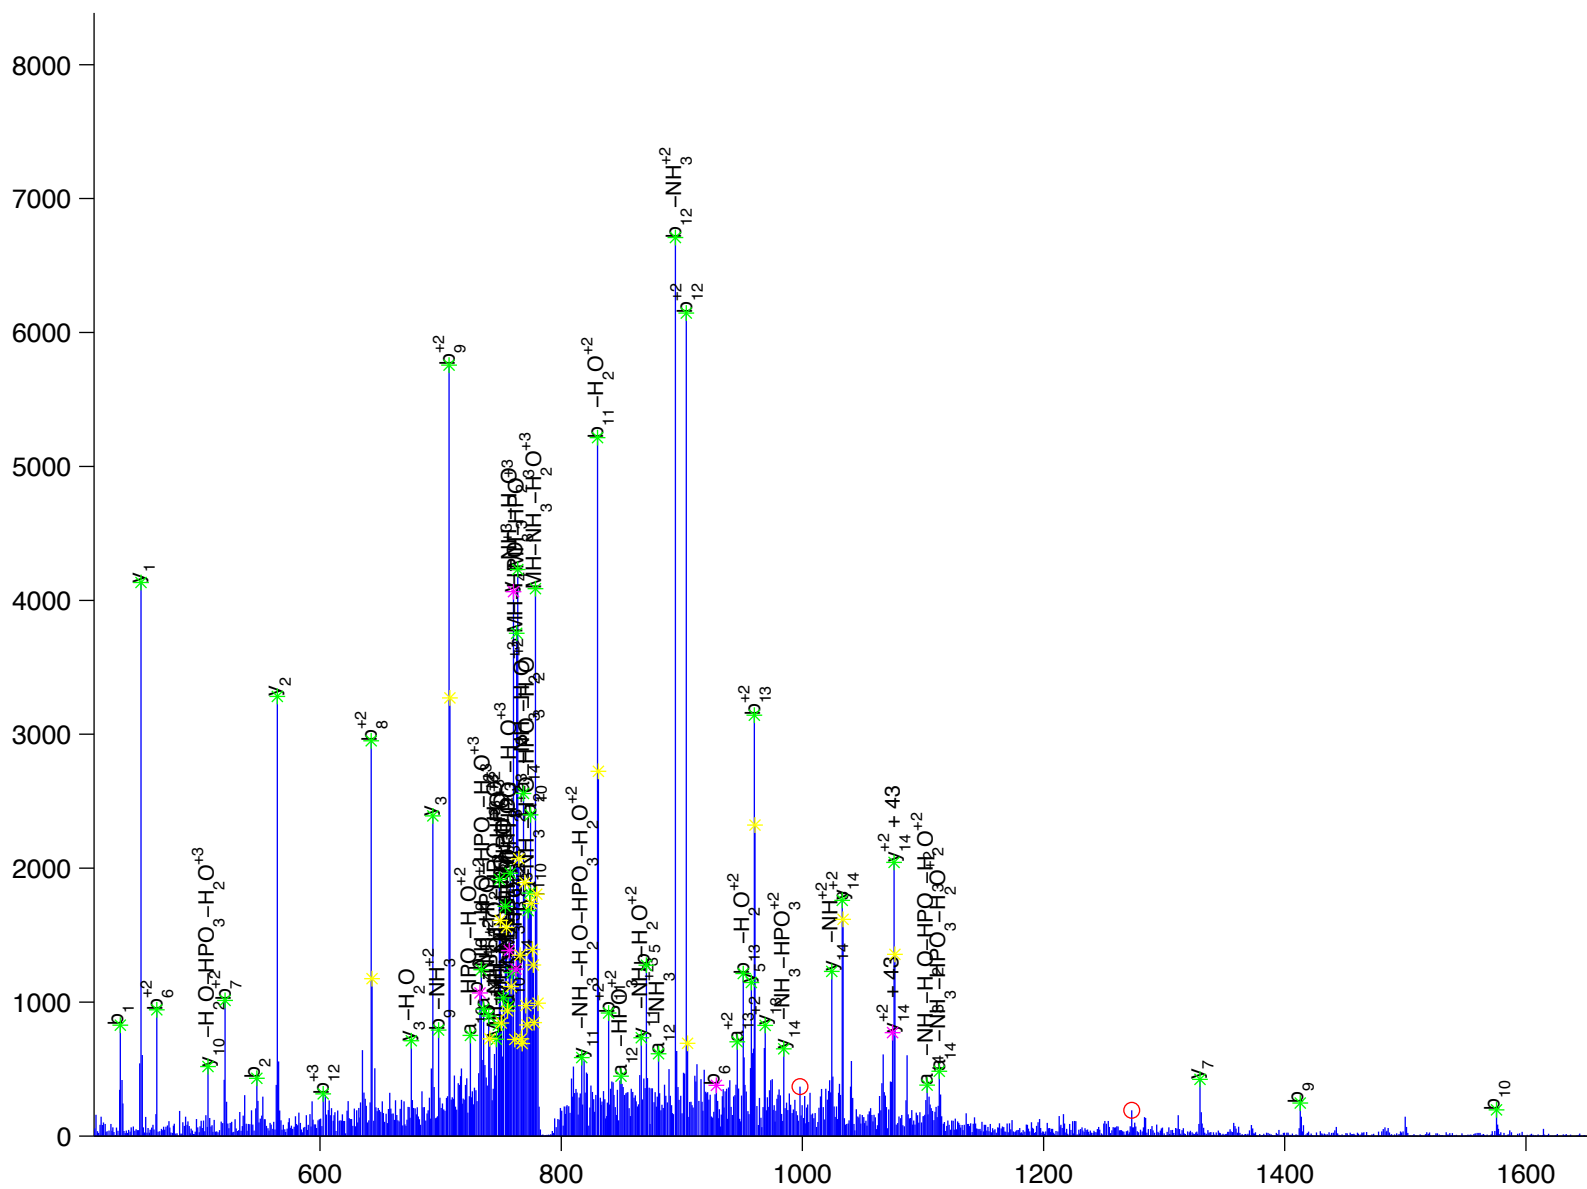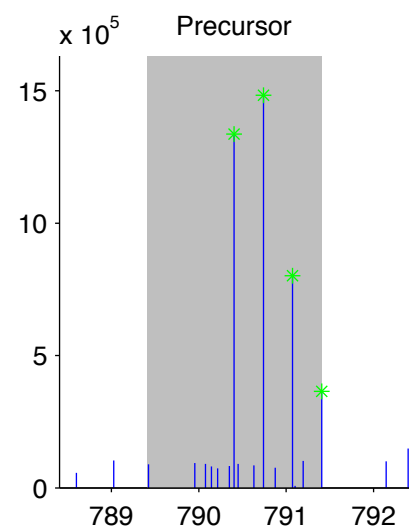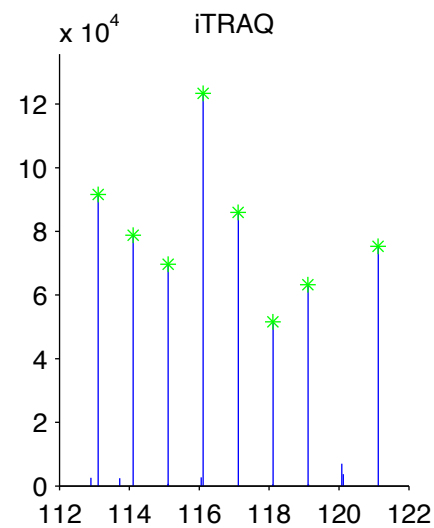

A I S F V G S N Q A G E y I F E R

aldehyde dehydrogenase family 6, subfamily A1

Charge State: +3

Scan Number: 8779

File Name: 090806ptp1blivers\_M\_NC2.raw

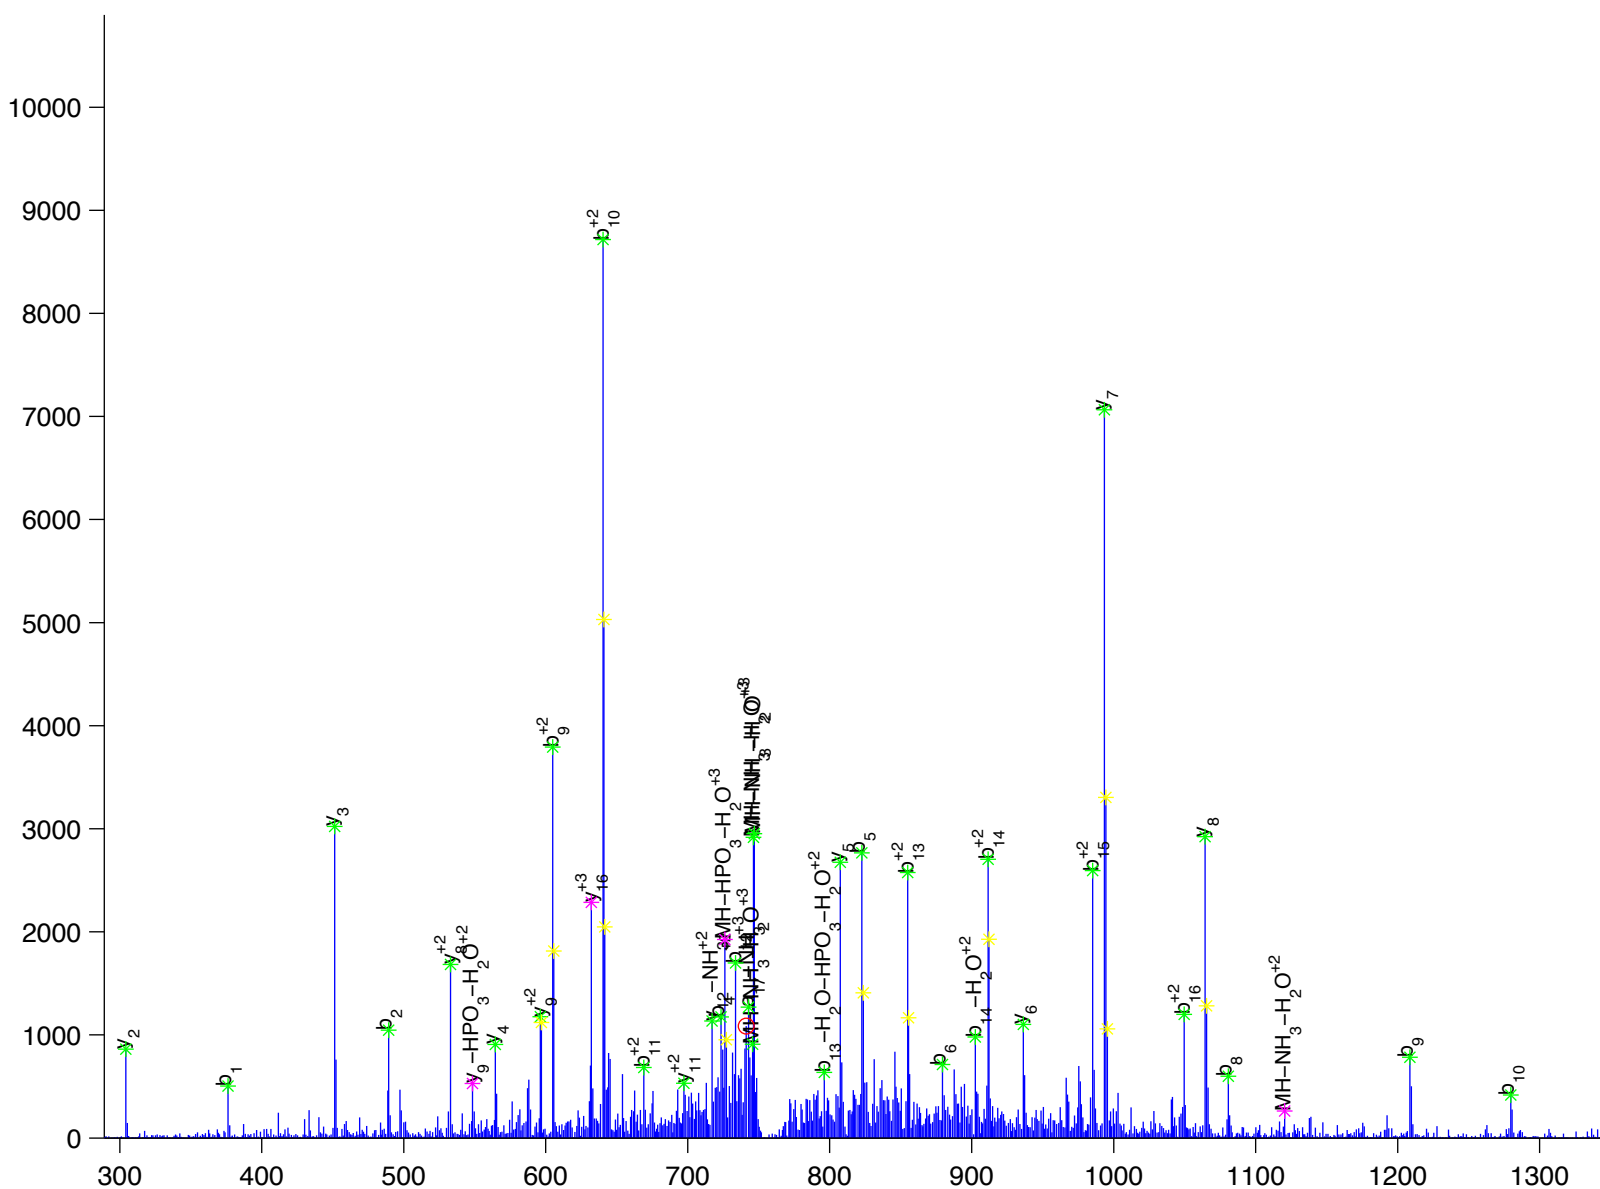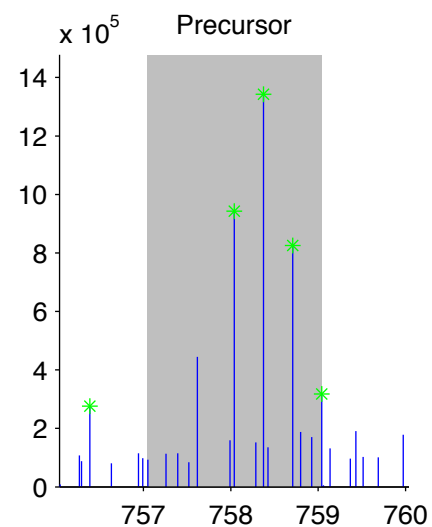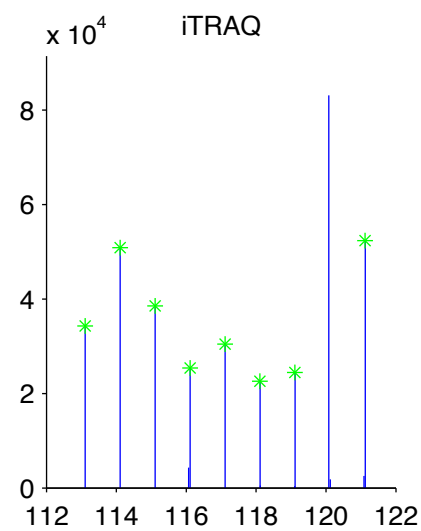

Y[A]S[I]C[Q]Q[N]G[L]V[P]I[V]E[P]E[V]L[P]D[G]D[H]D[L]E[H]C[Q]y[V]S[E]K

aldolase 2, B isoform

Charge State: +4

Scan Number: 6247

File Name: 090728ptp1blivers\_M\_NC\_ins\_e.raw

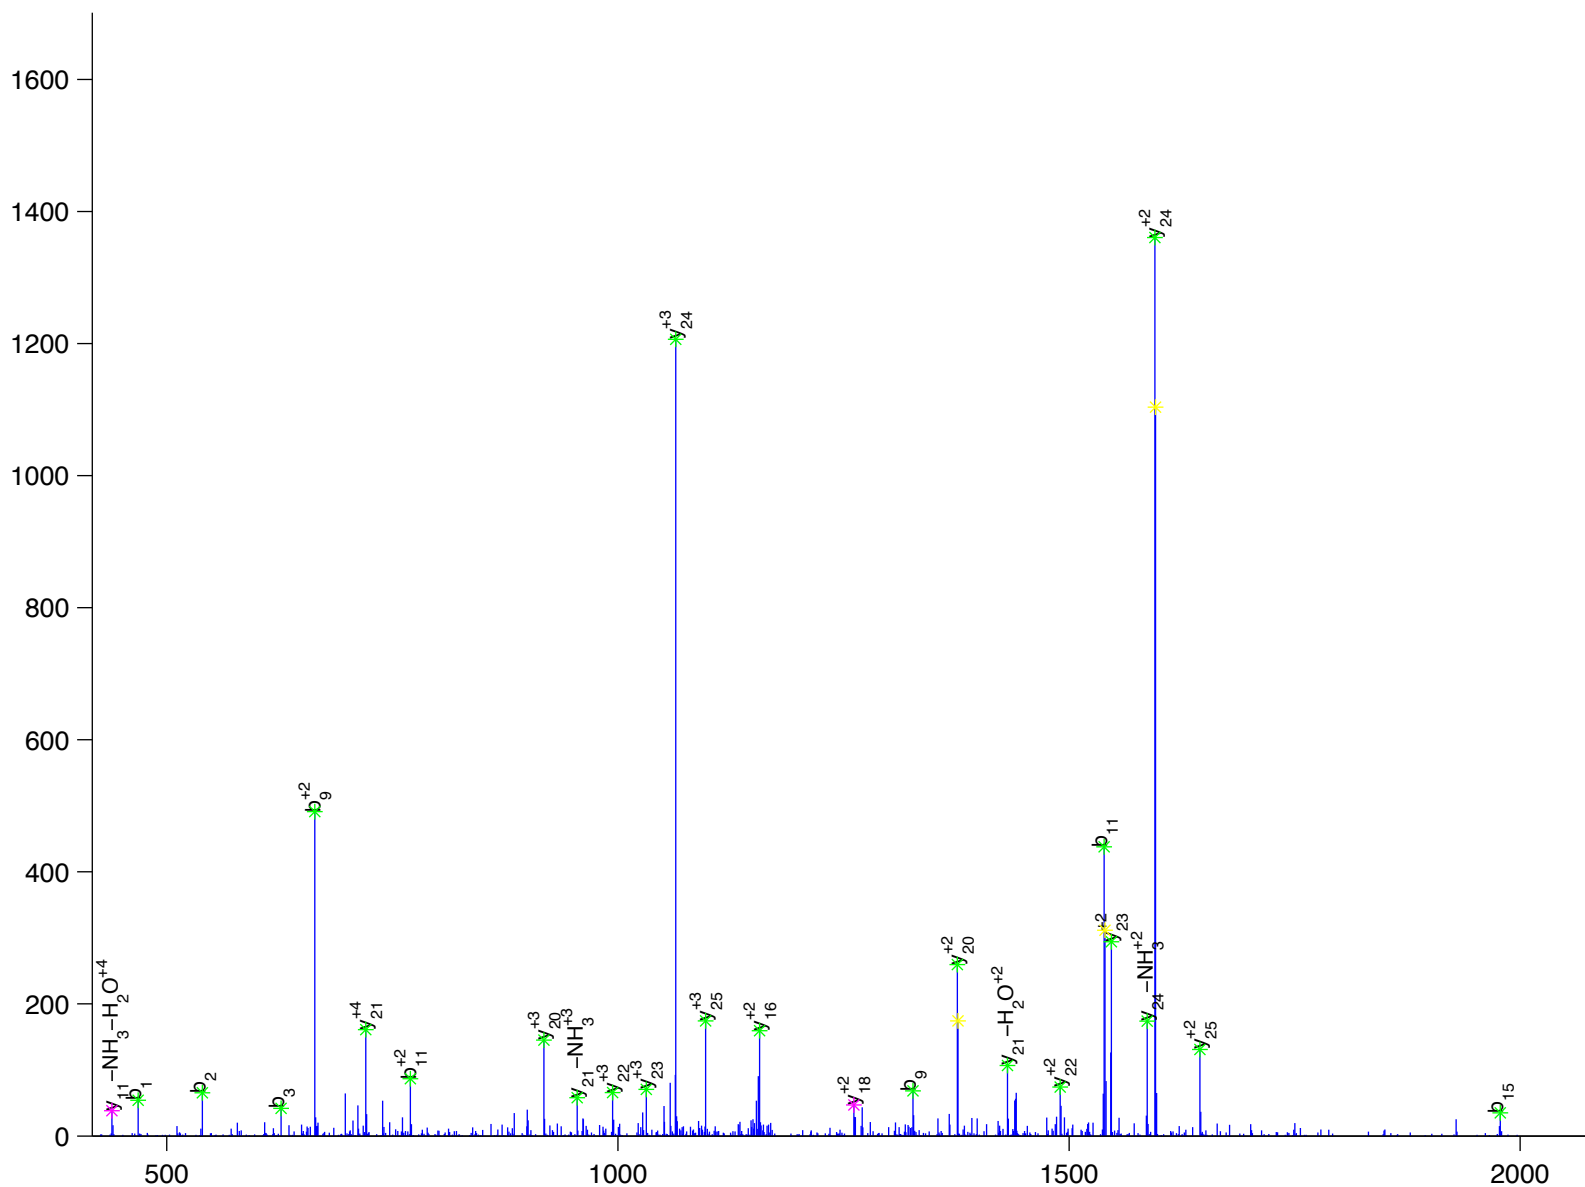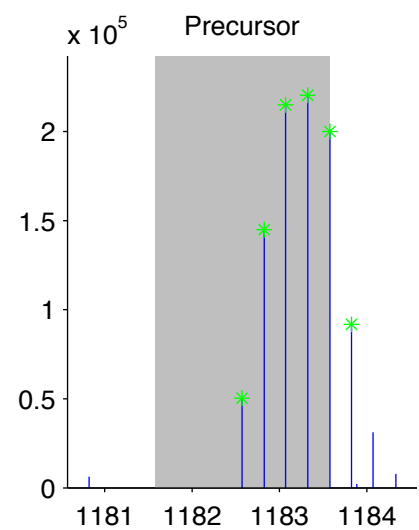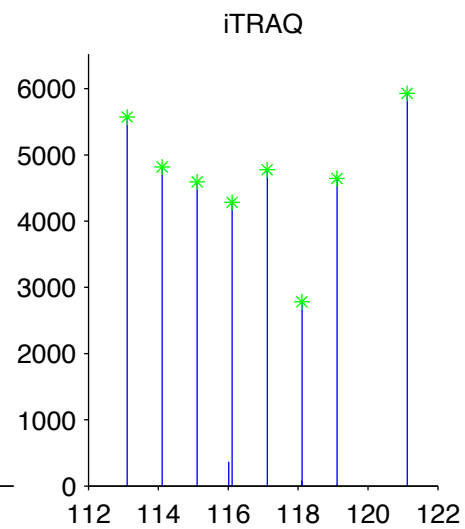

I [ Q ] S [ S ] A [ P ] Q [ E ] E [ E ] E [ H ] P [ y ] E [ L ] L [ L ] T [ A ] E [ T ] K

ankyrin repeat and sterile alpha motif domain containing 1

Charge State: +4

Scan Number: 5558

File Name: 090728ptp1blivers\_M\_NC\_ins\_e.raw

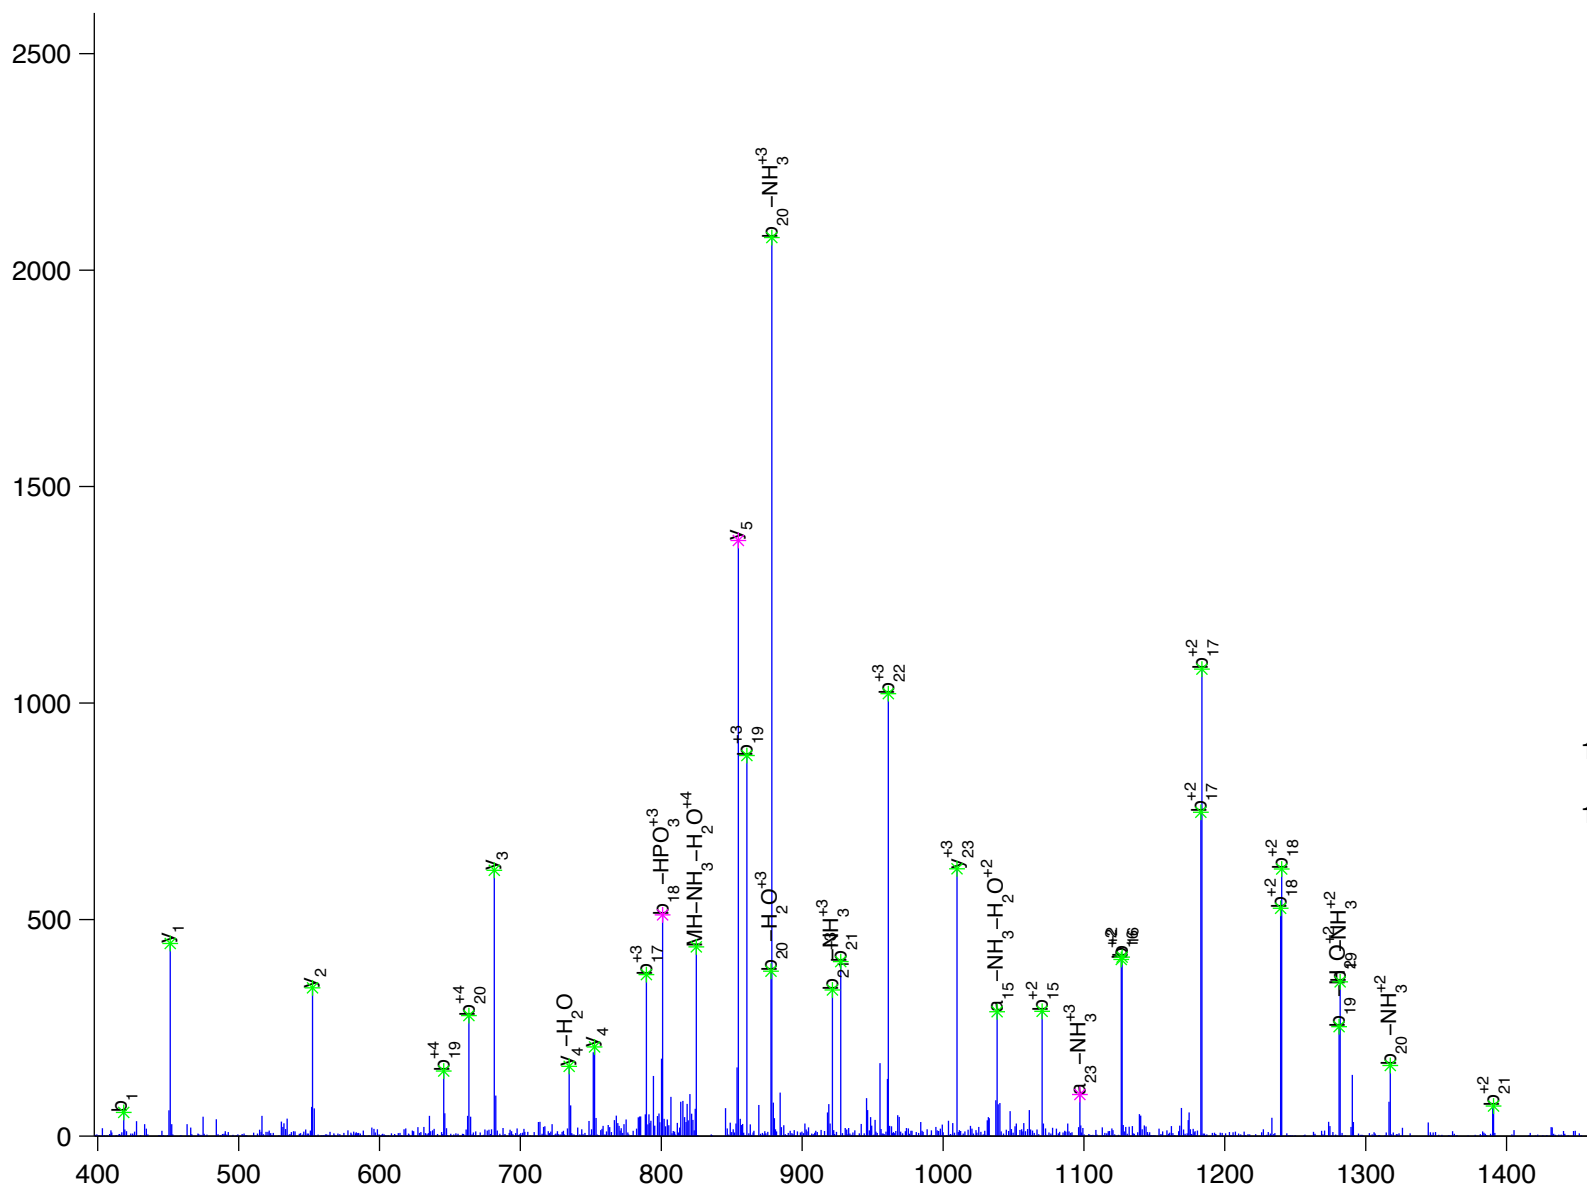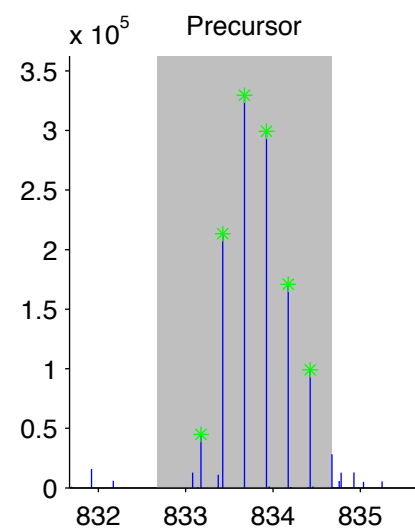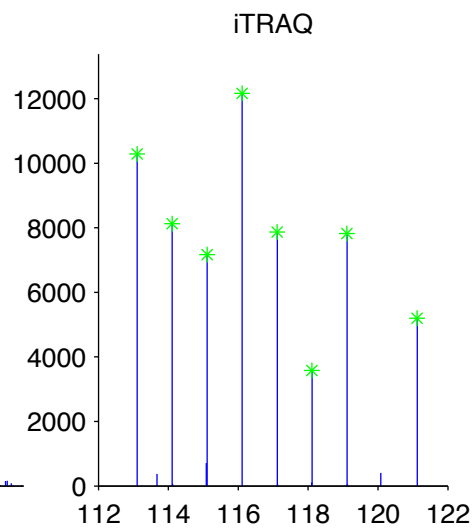



L [ S ] [ L ] [ E ] [ G ] [ D ] [ H ] [ S ] [ T ] [ P ] [ P ] [ S ] [ A ] [ y ] [ G ] [ S ] [ V ] [ K ] [ P ] [ Y ] [ T ] [ N ] [ F ] [ D ] [ A ] [ E ] [ R ]

annexin A2

Charge State: +4

Scan Number: 5690

File Name: 091130ptp1blivers\_hfd\_basal2.raw

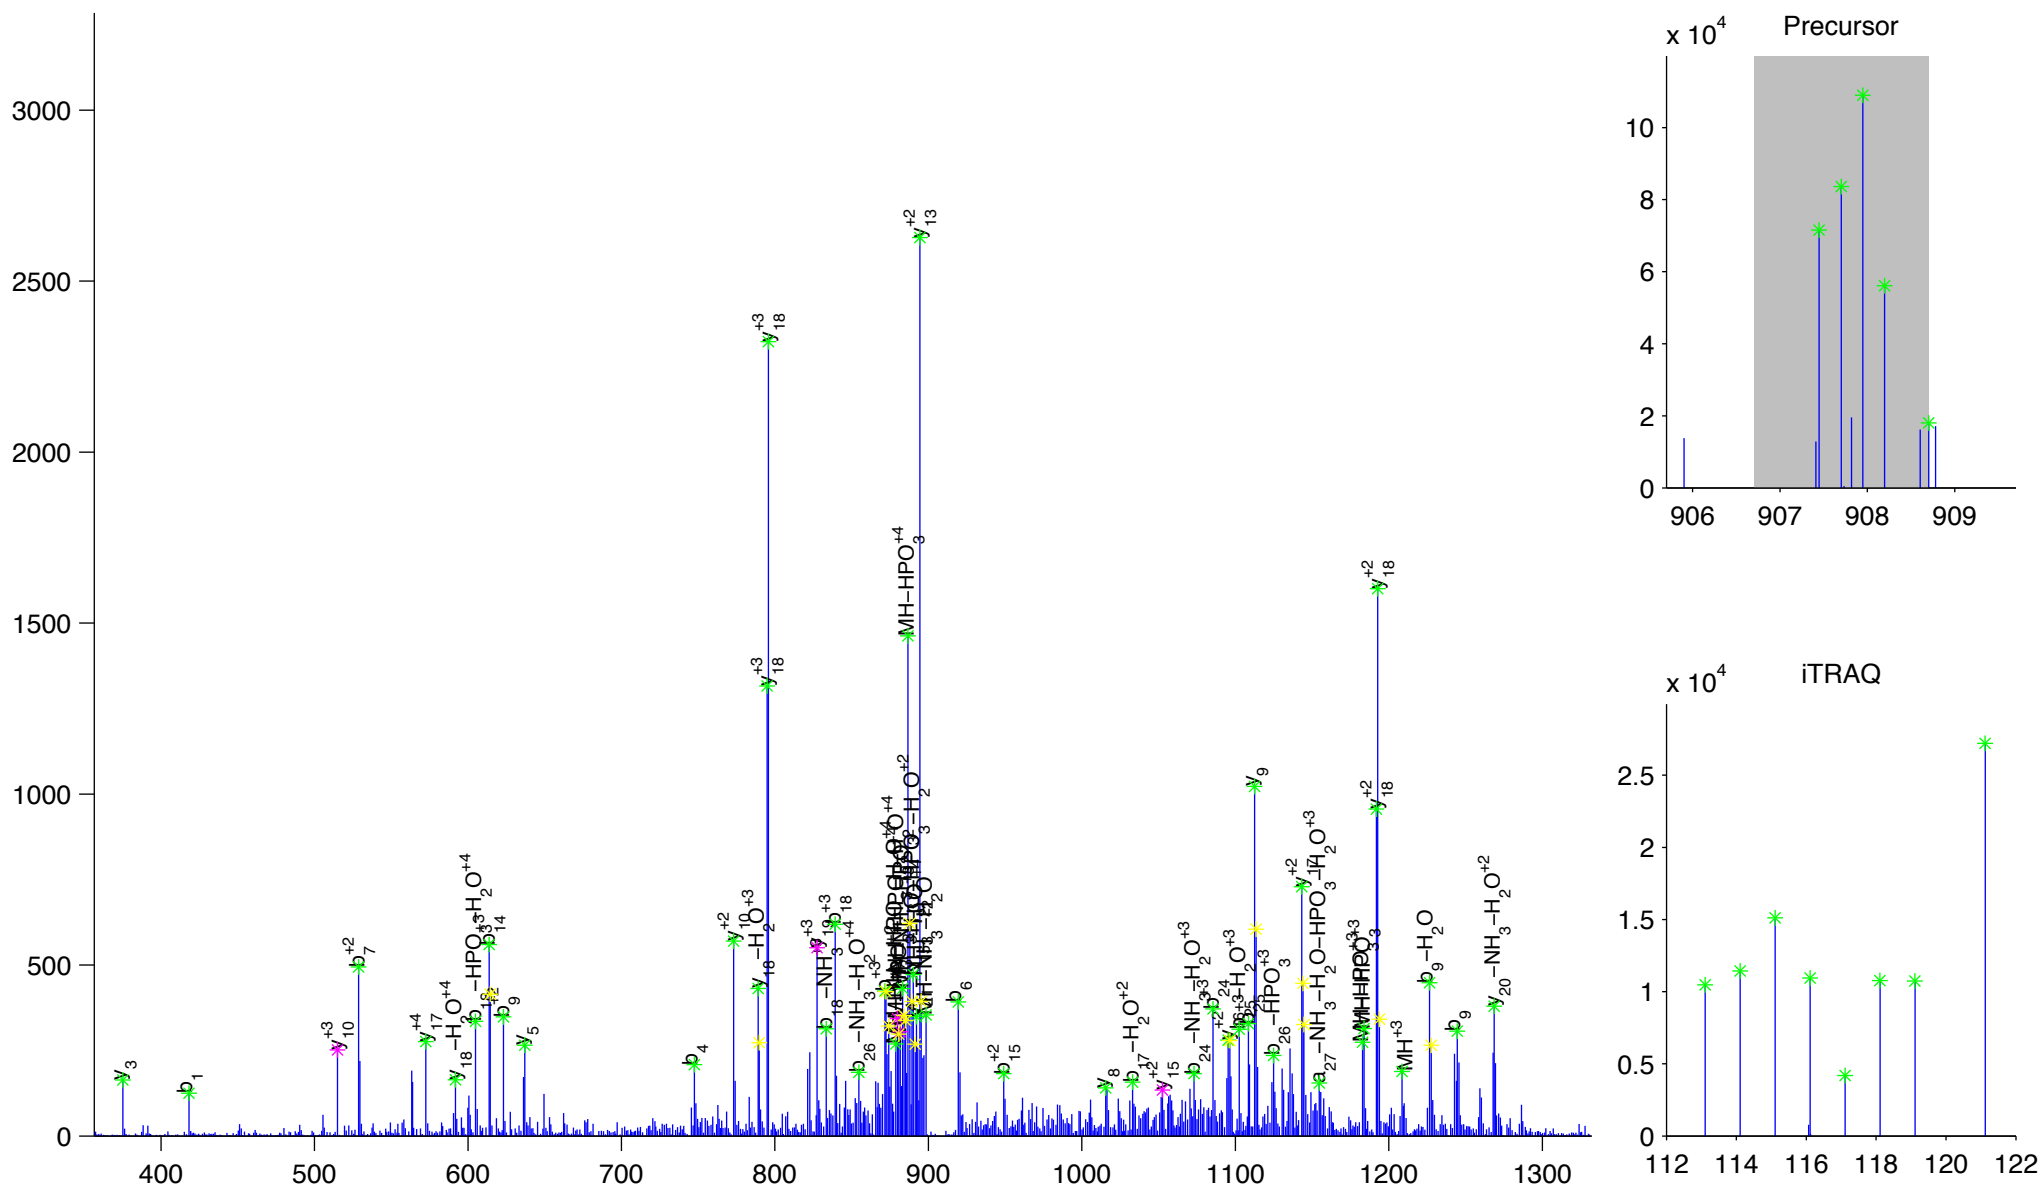

y [ F ] [ S ] [ M ] [ T ] [ E ] [ V ] [ D ] K

arginase 1, liver

Charge State: +2

Scan Number: 4689

File Name: 090728ptp1blivers\_M\_NC\_ins\_e.raw

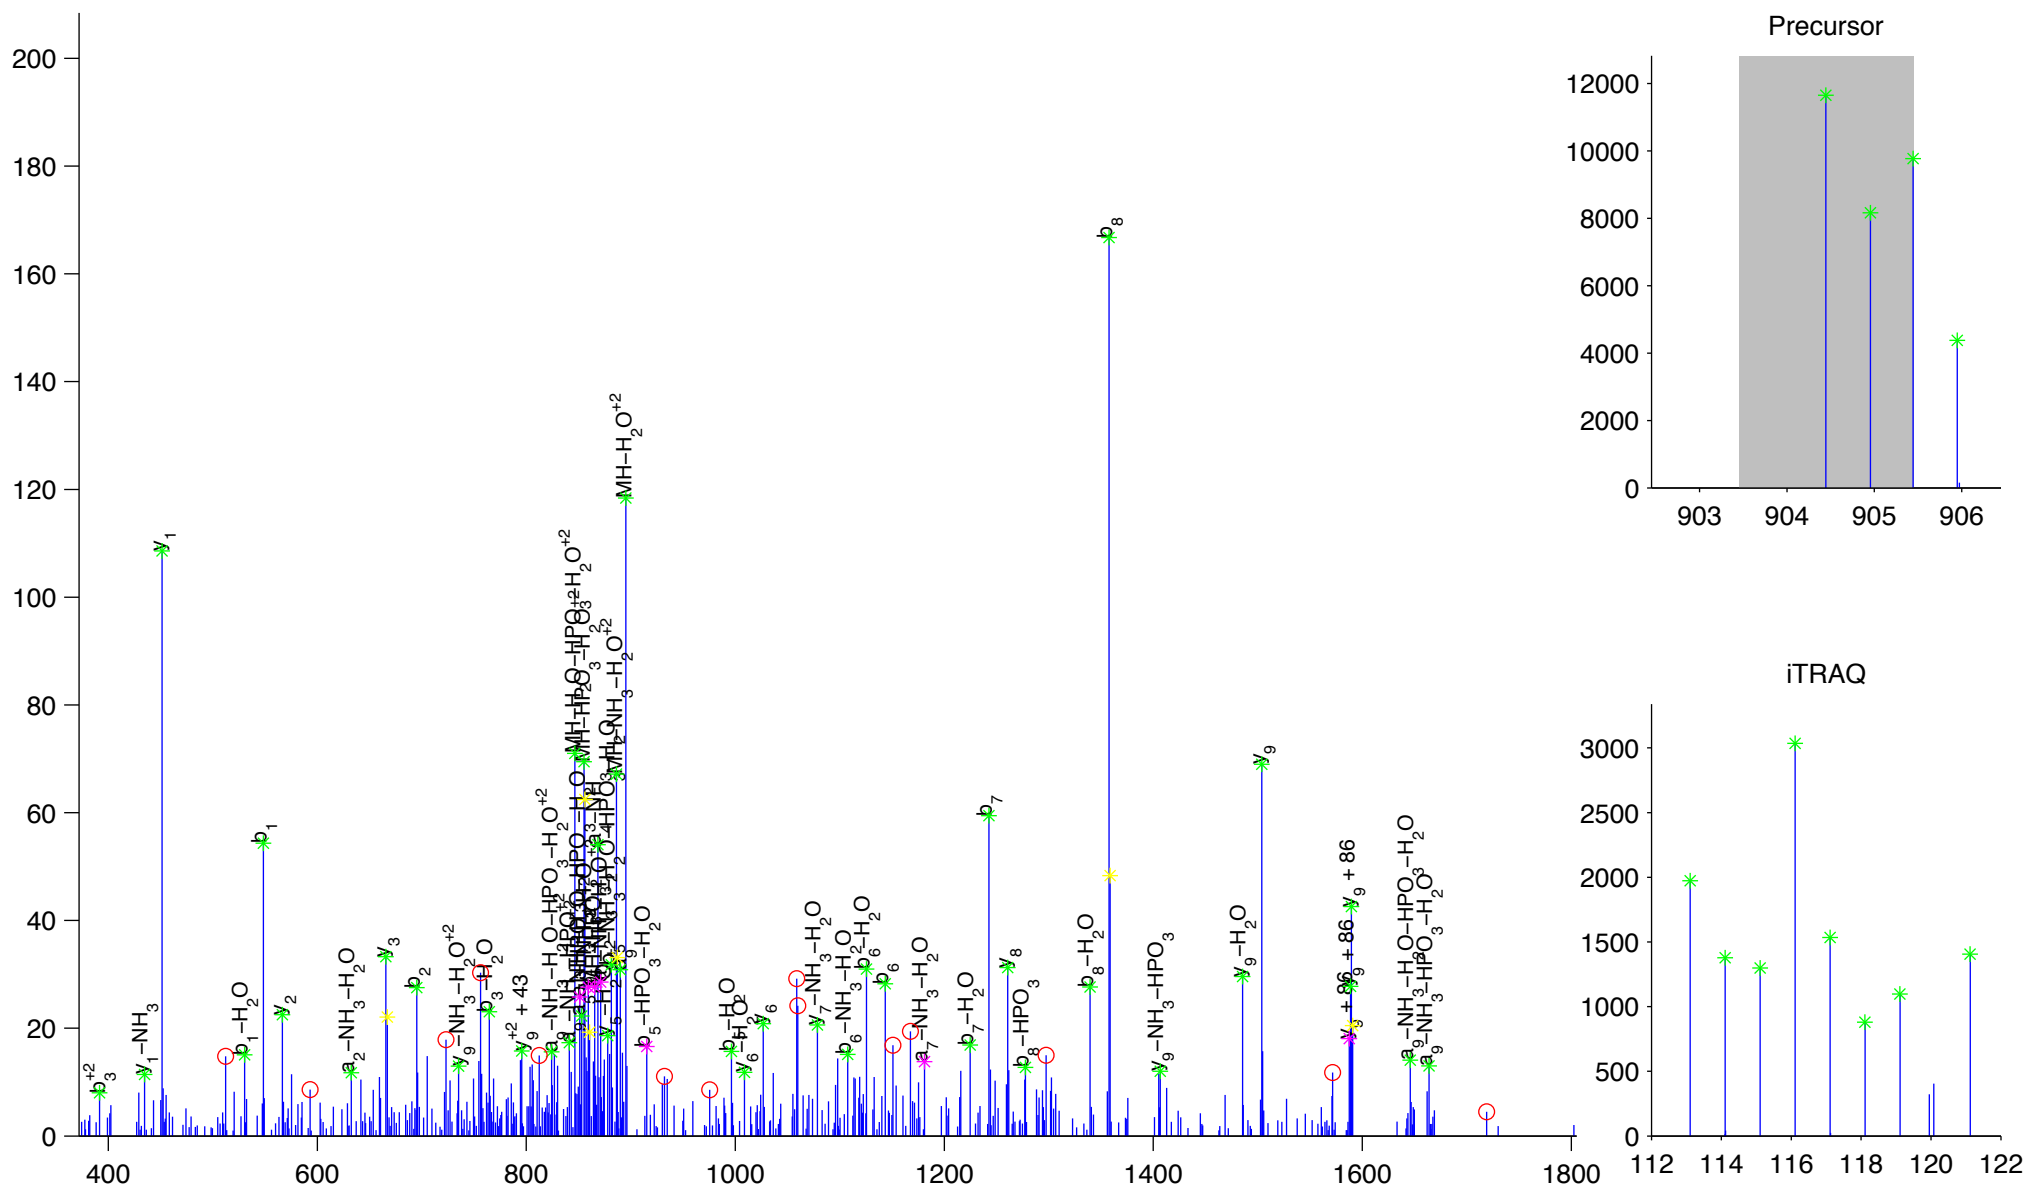

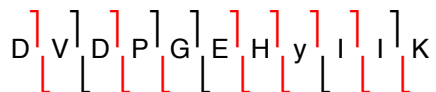

arginase 1, liver

Charge State: +3

Scan Number: 4838

File Name: 091130ptp1blivers\_hfd\_basal2.raw

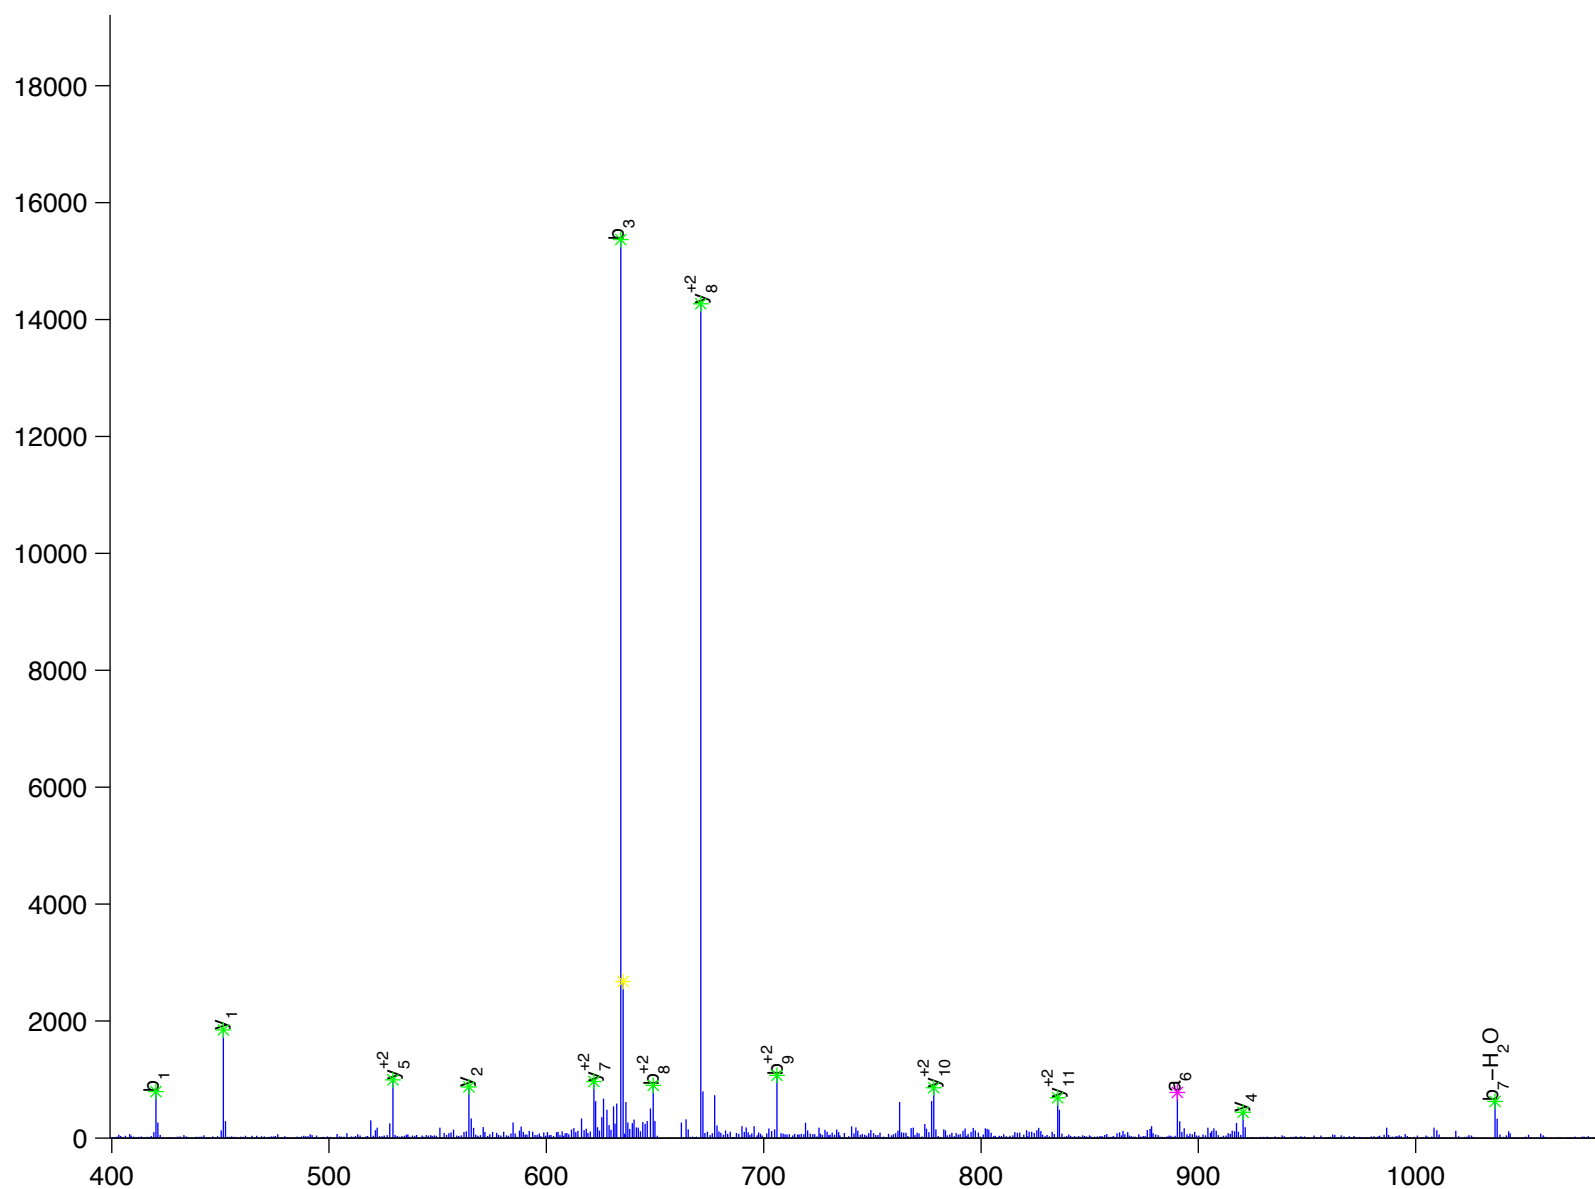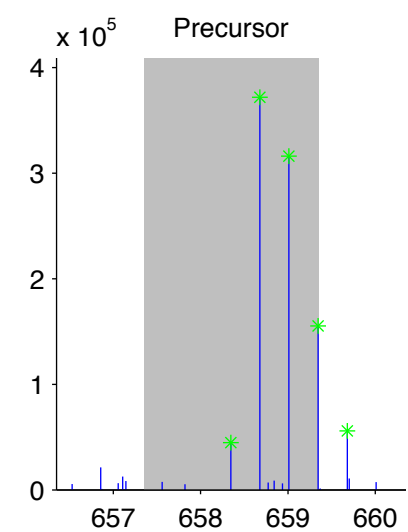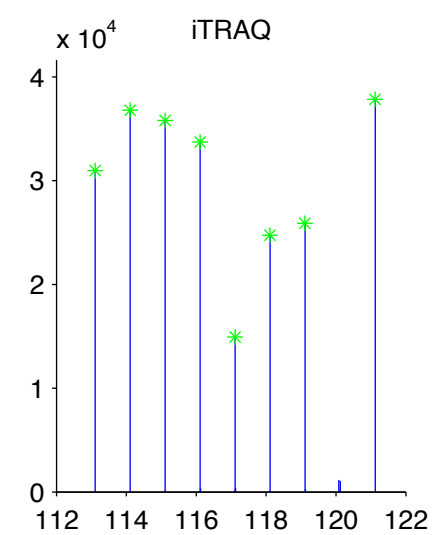

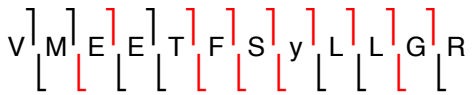

arginase 1, liver

Charge State: +3

Scan Number: 4887

File Name: HJ072909\_HFD\_E1\_2.raw

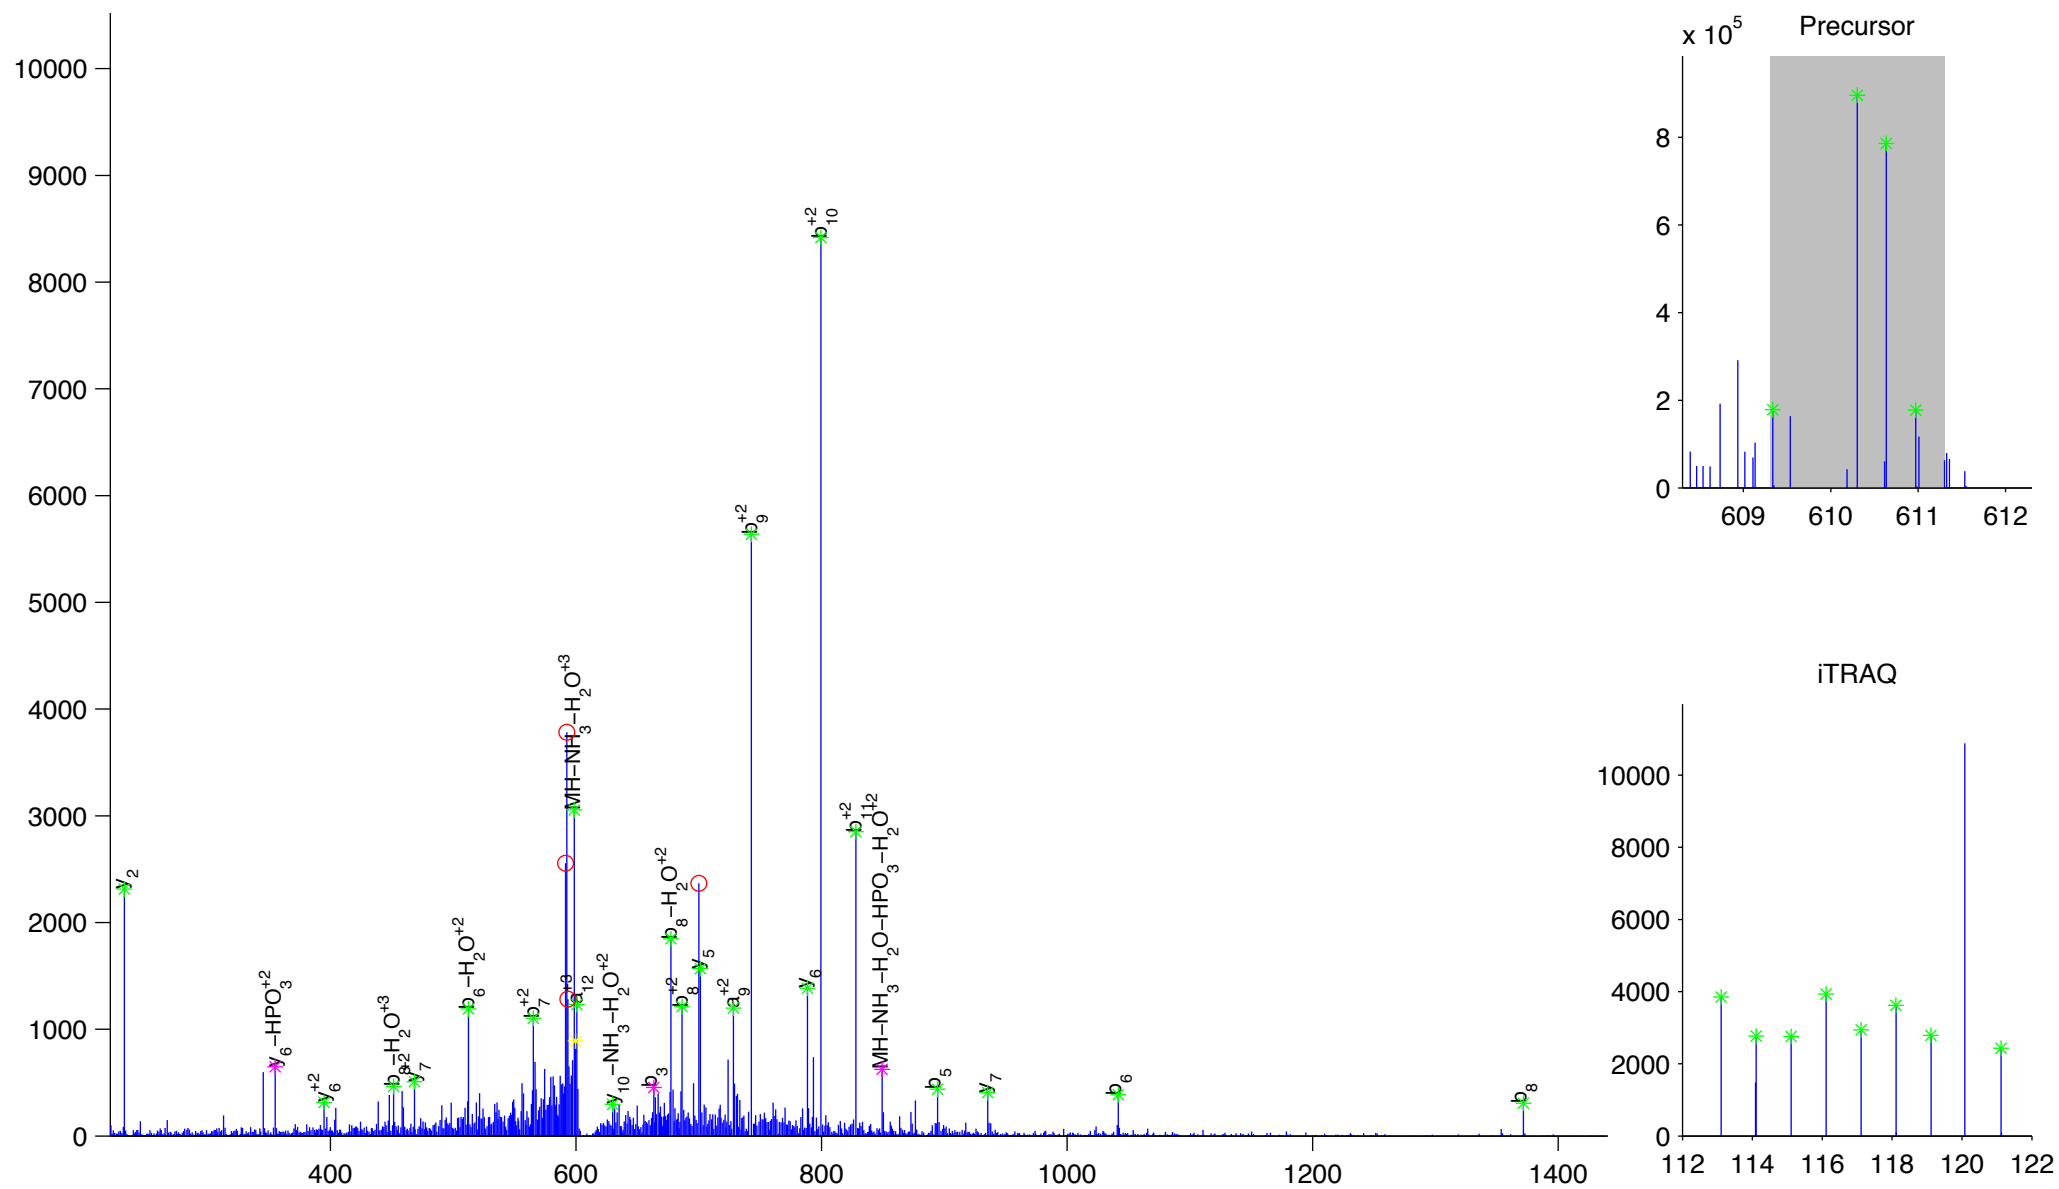

E [ G ] L [ Y ] I [ T ] E [ E ] I [ y ] K

arginase 1, liver

Charge State: +3

Scan Number: 6911

File Name: 091130ptp1blivers\_hfd\_basal2.raw

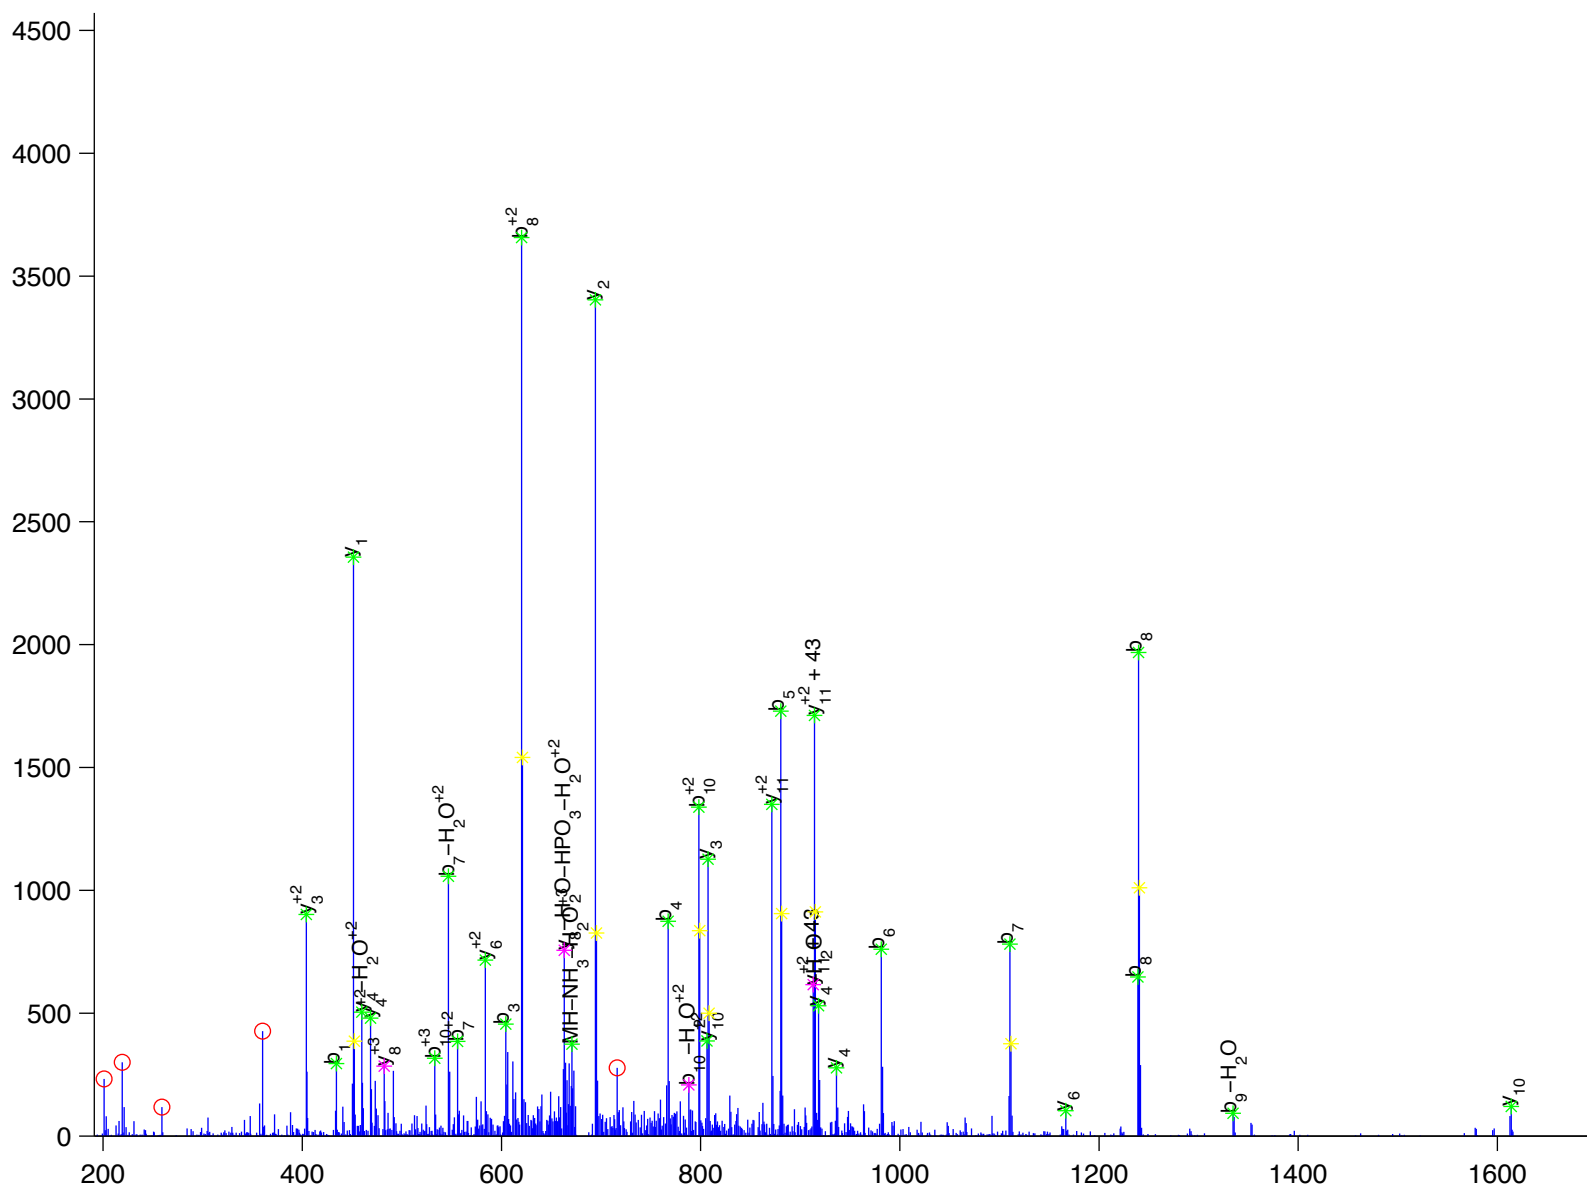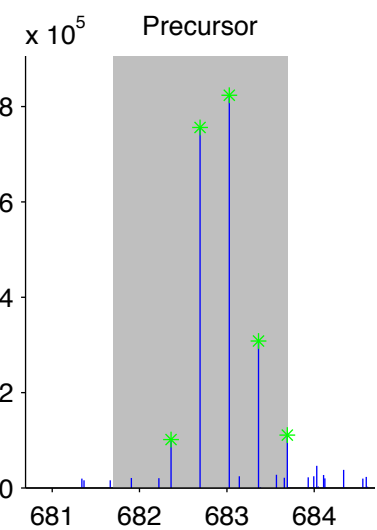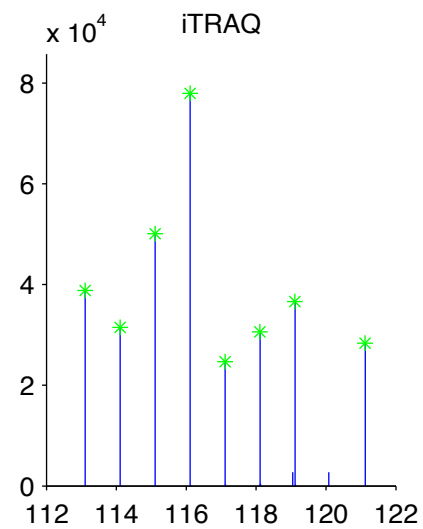

E [ Q ] G [ y ] D [ V ] I [ A ] Y [ L ] A [ N ] I [ G ] Q [ K ]

argininosuccinate synthetase

Charge State: +3

Scan Number: 6973

File Name: 100905ptp1blivers\_ncHFD\_basal.raw

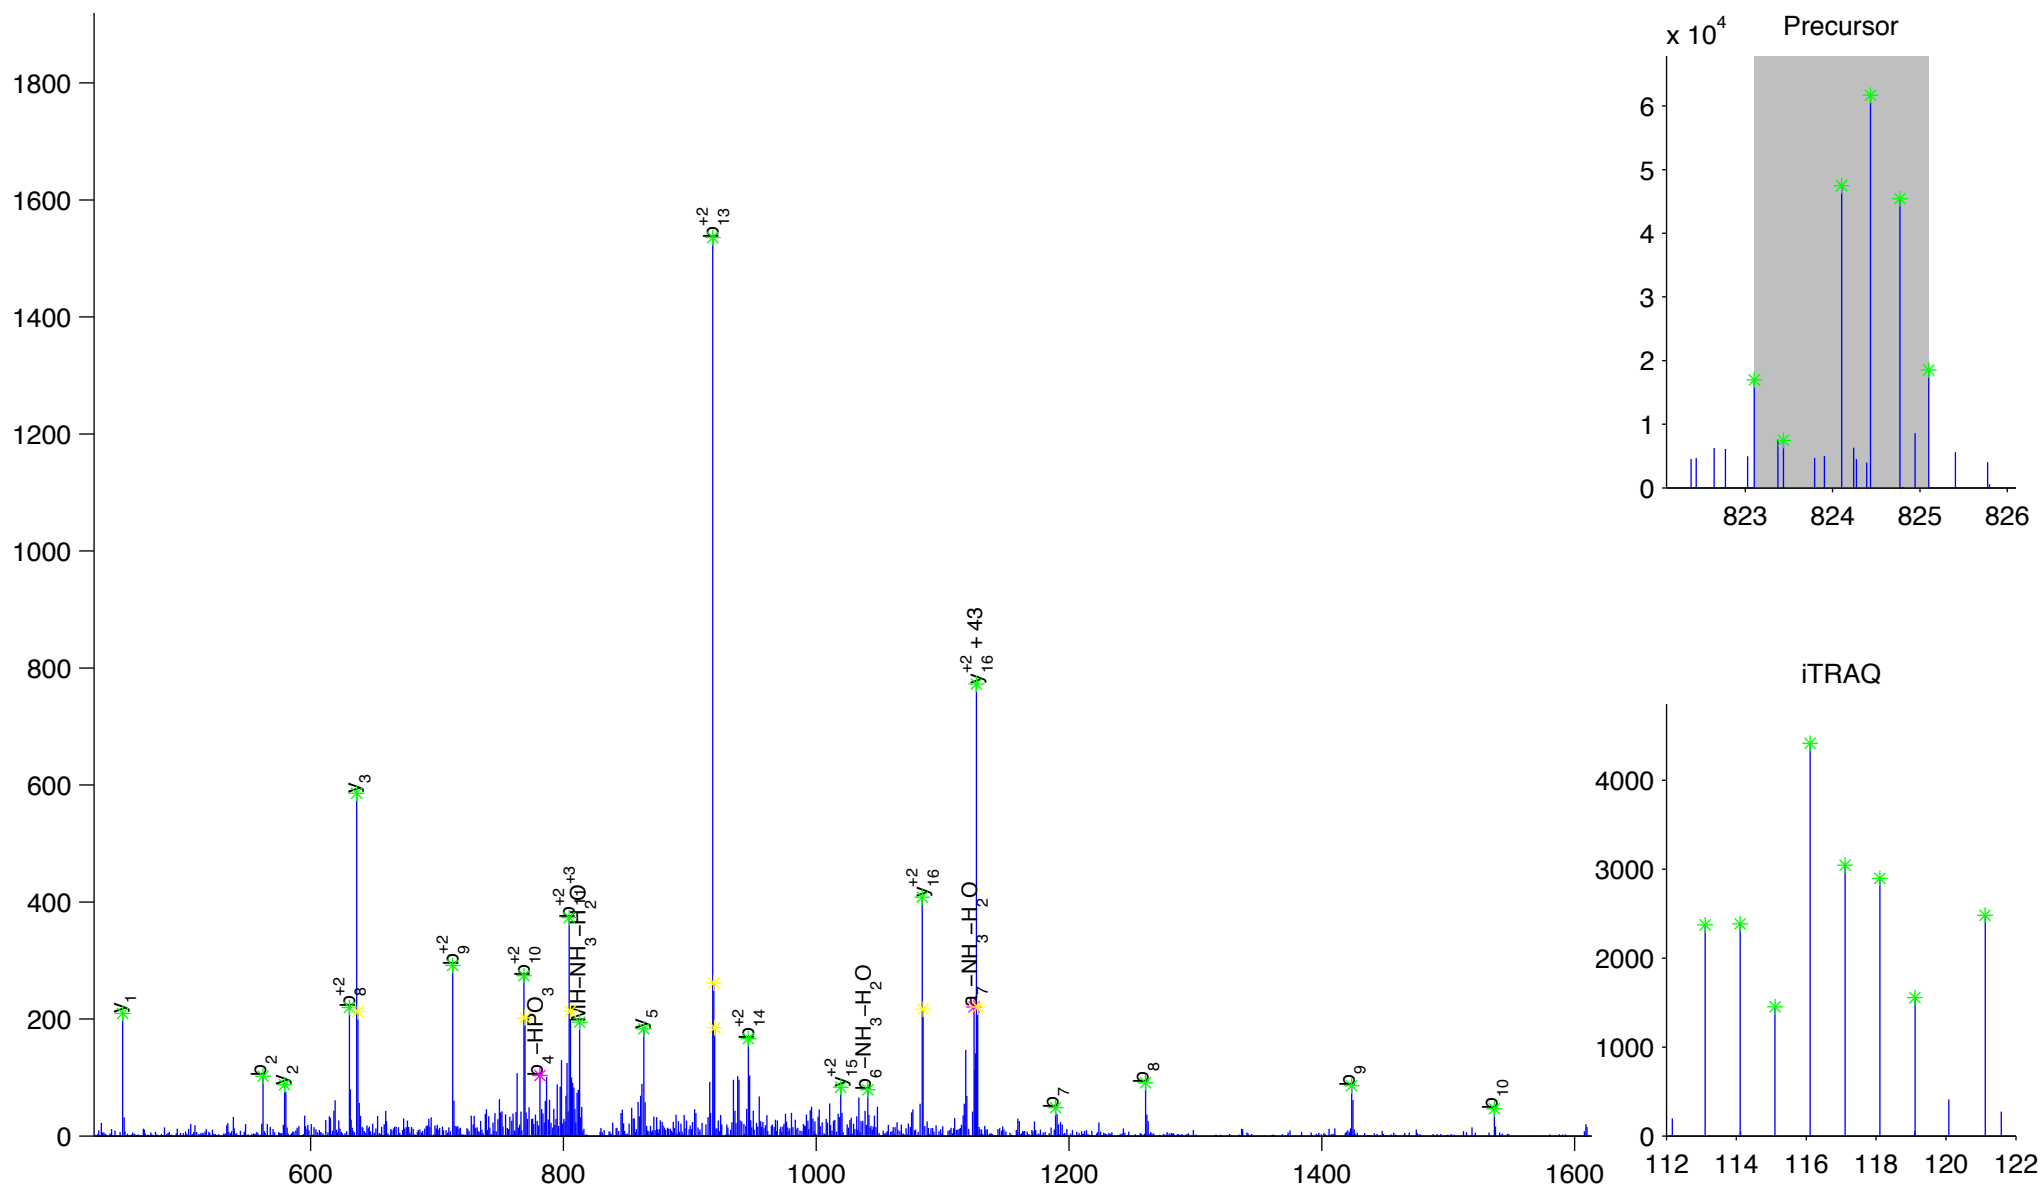



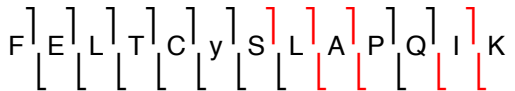

argininosuccinate synthetase

Charge State: +3

Scan Number: 8692

File Name: 090806ptp1blivers\_M\_NC2.raw

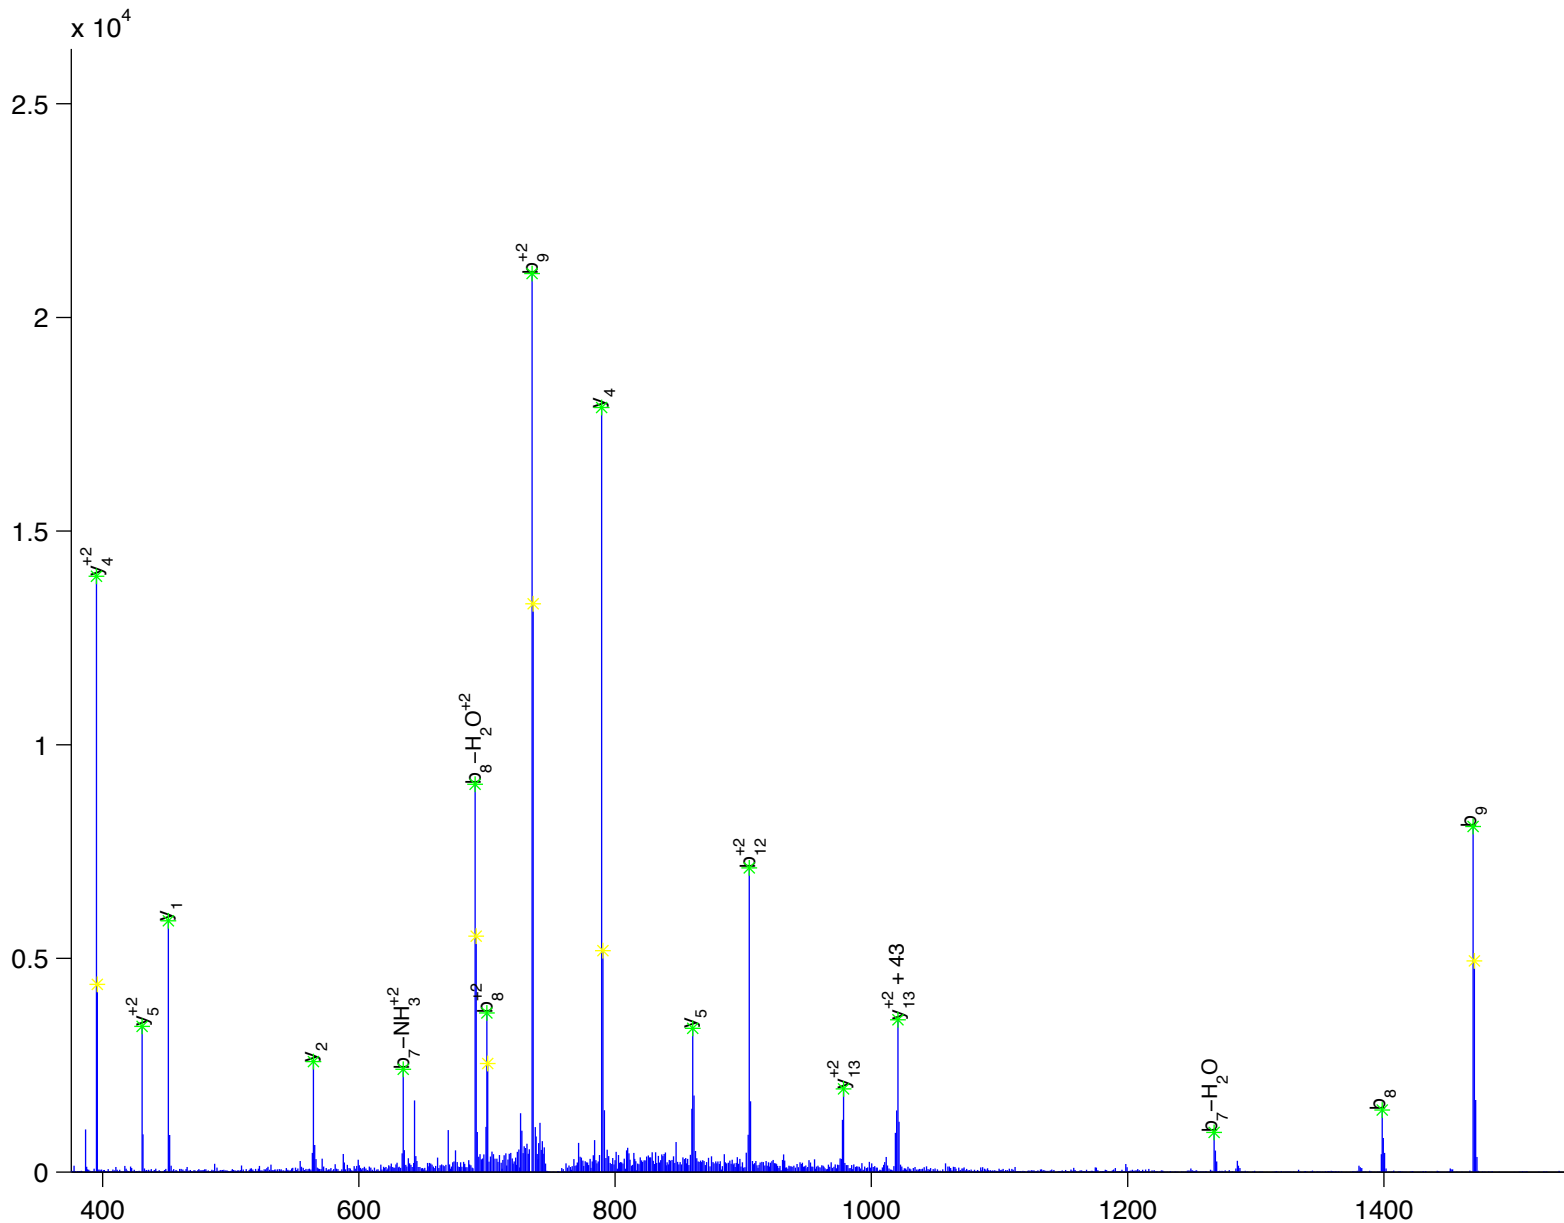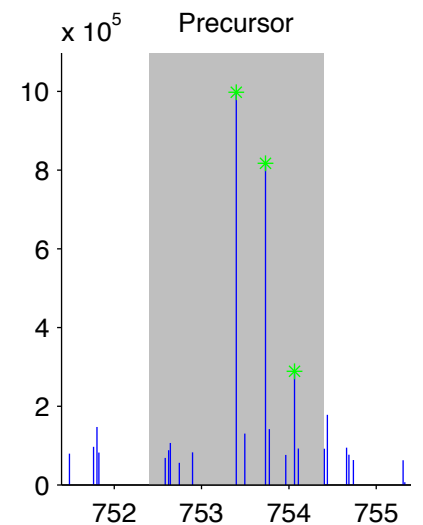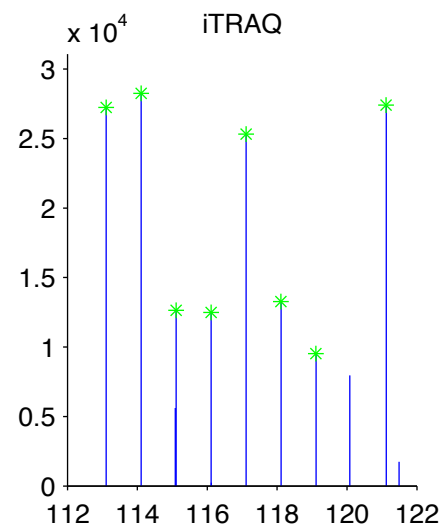



T T D G V y E G V A I G G D R

ATP citrate lyase

Charge State: +3

Scan Number: 3360

File Name: 100827ptp1blivers\_ncHFD\_basal.raw

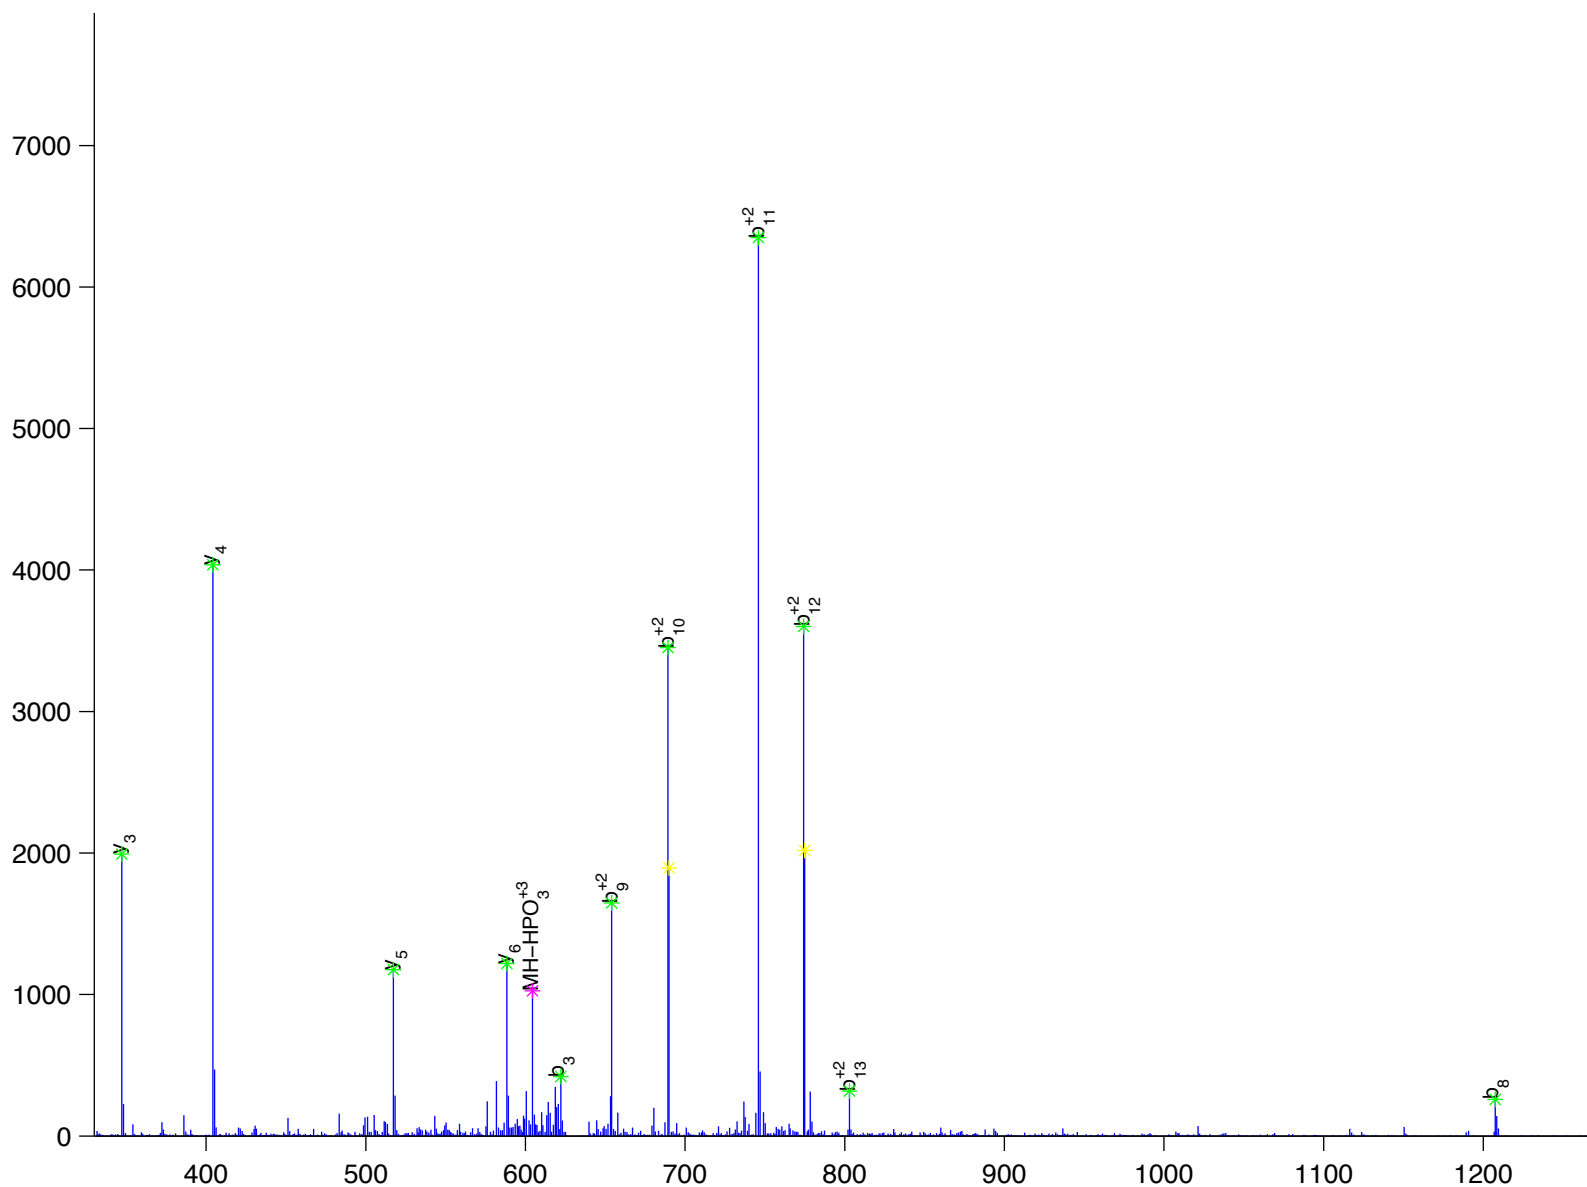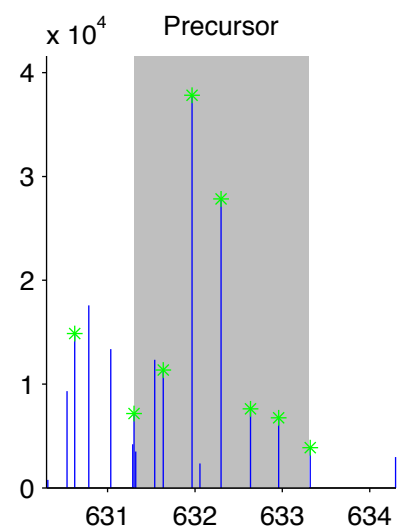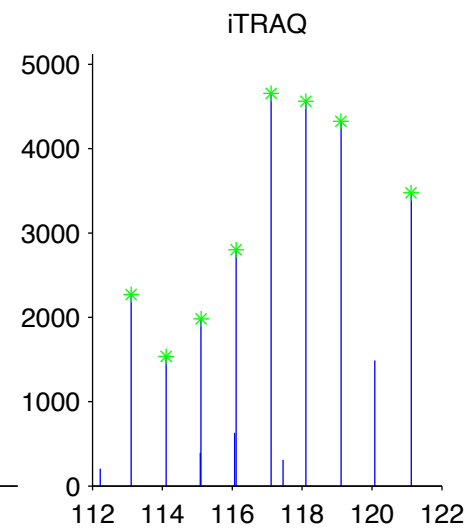

T T D G V y E G V A I G G D R Y P G S T F M D H V L R

ATP citrate lyase

Charge State: +4

Scan Number: 7213

File Name: 091130ptp1blivers\_hfd\_basal2.raw

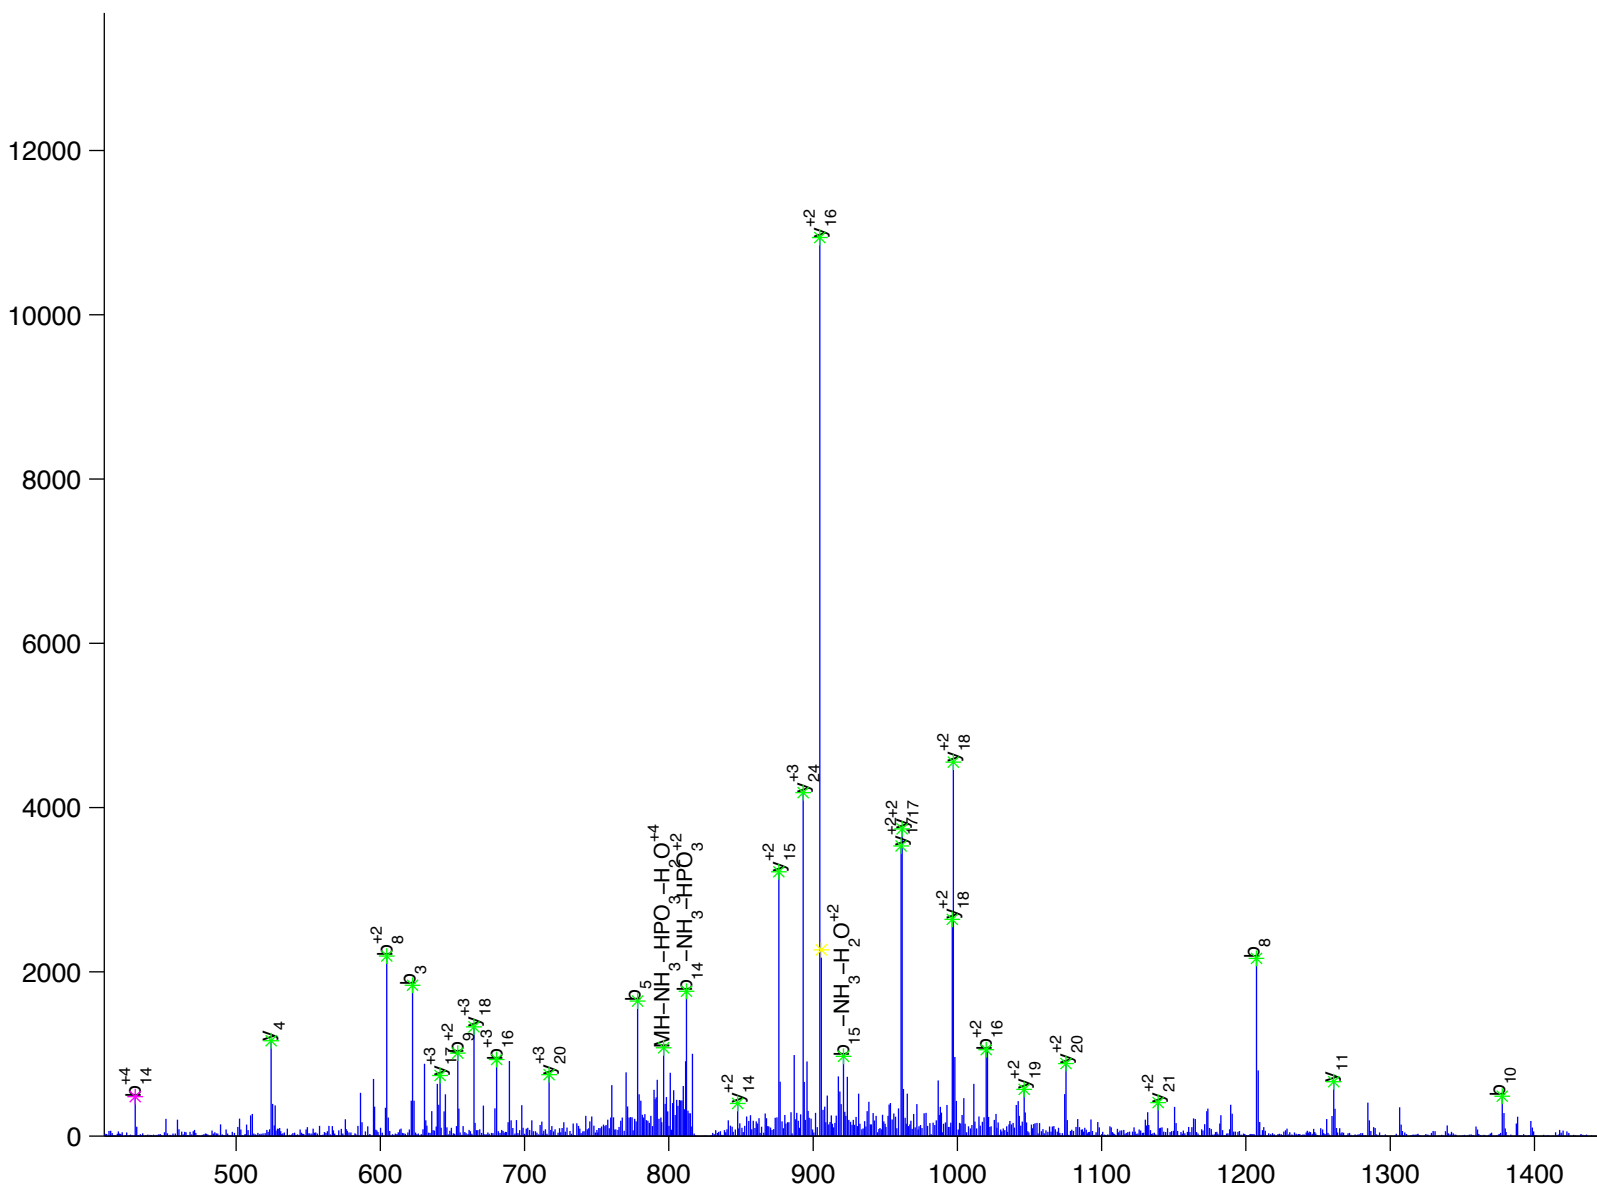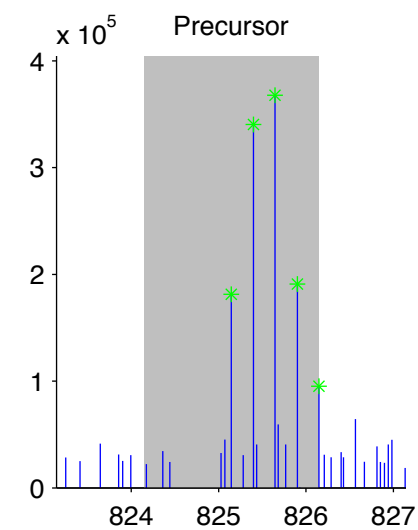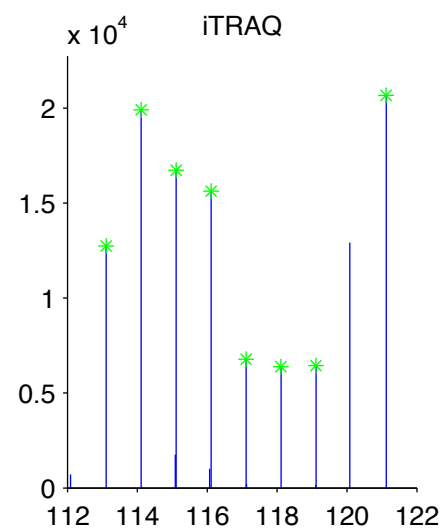

S  
 [A] [V] [Y] [I] [I] [E] [N] [A] [K]

Atpase, class VI, type 11C isoform b

Charge State: +3

Scan Number: 6791

File Name: 091130ptp1blivers\_hfd\_basal2.raw

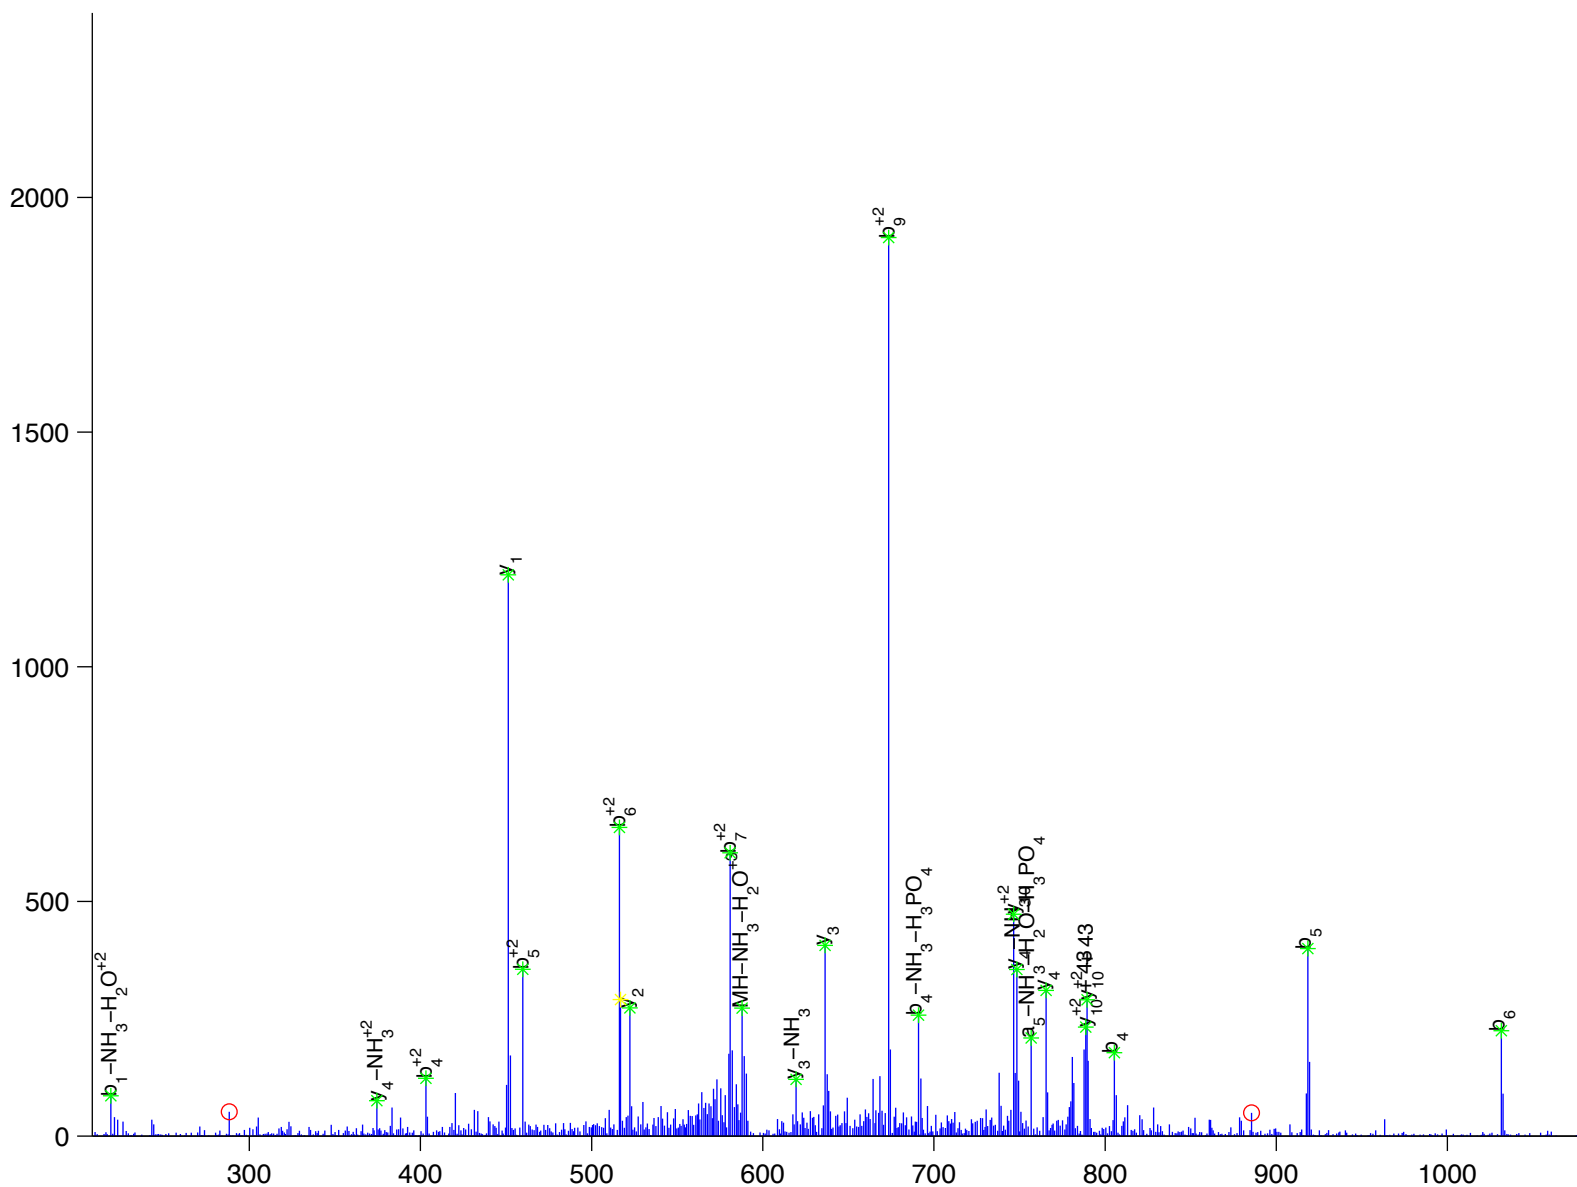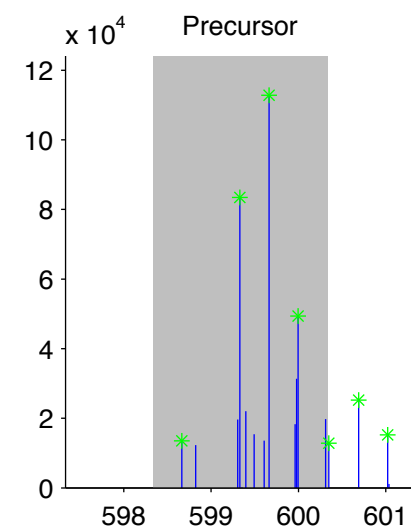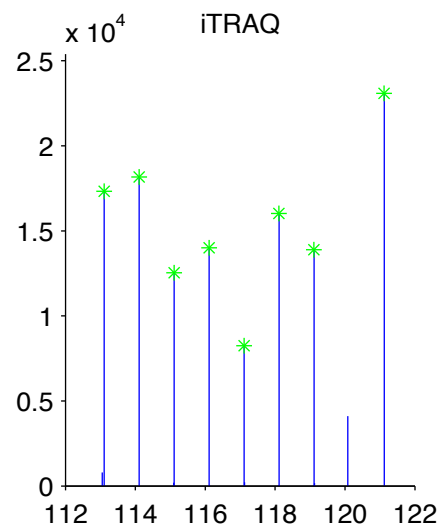

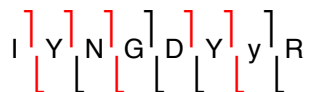

AXL receptor tyrosine kinase

Charge State: +2

Scan Number: 3621

File Name: 090728ptp1blivers\_M\_NC\_ins\_e.raw

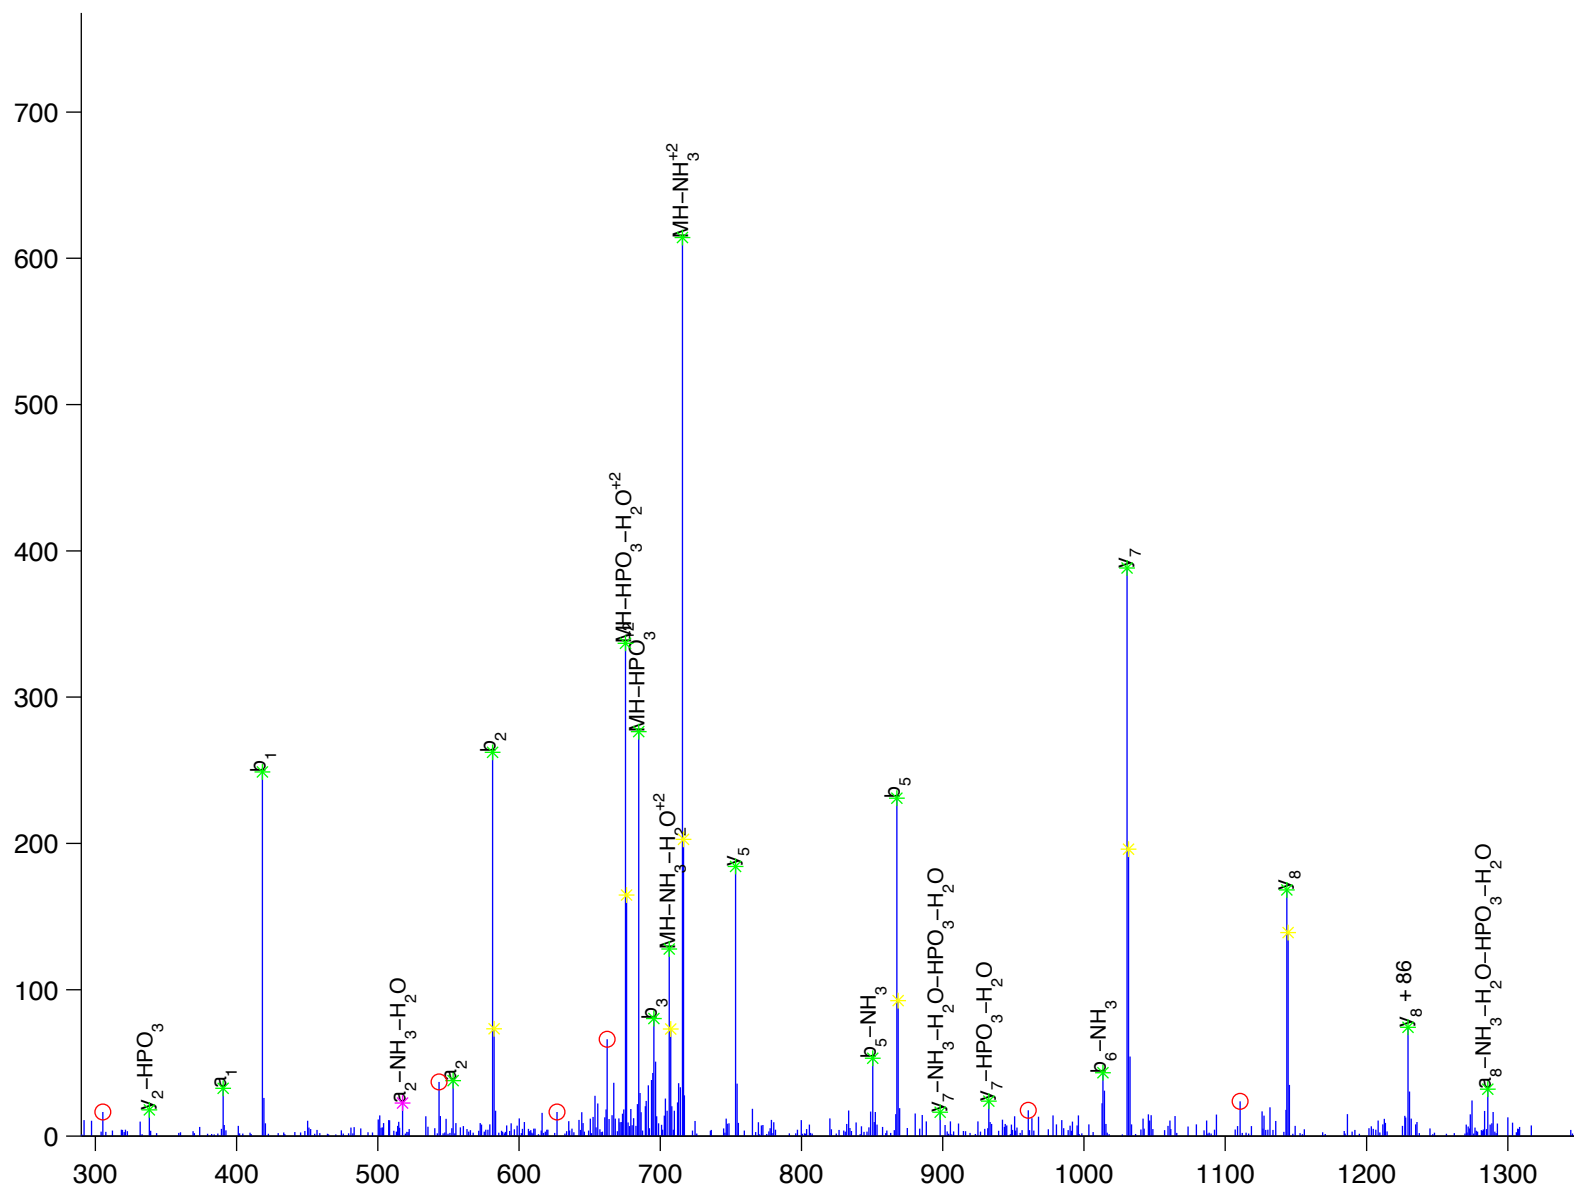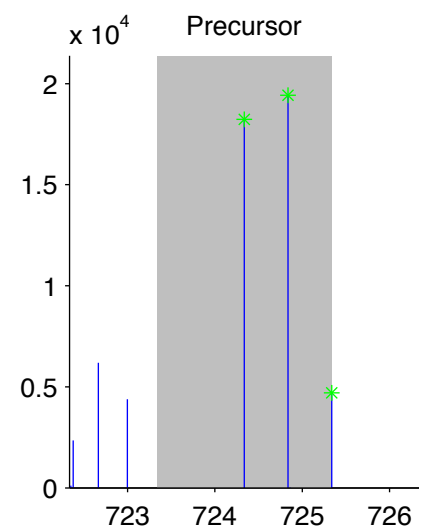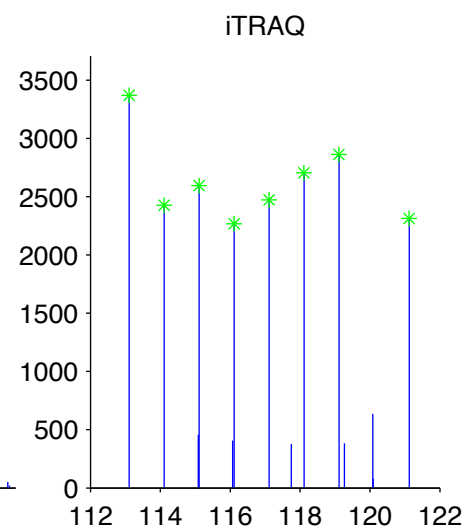

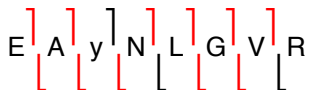

betaine-homocysteine methyltransferase

Charge State: +2

Scan Number: 4647

File Name: 091130ptp1blivers\_hfd\_basal2.raw

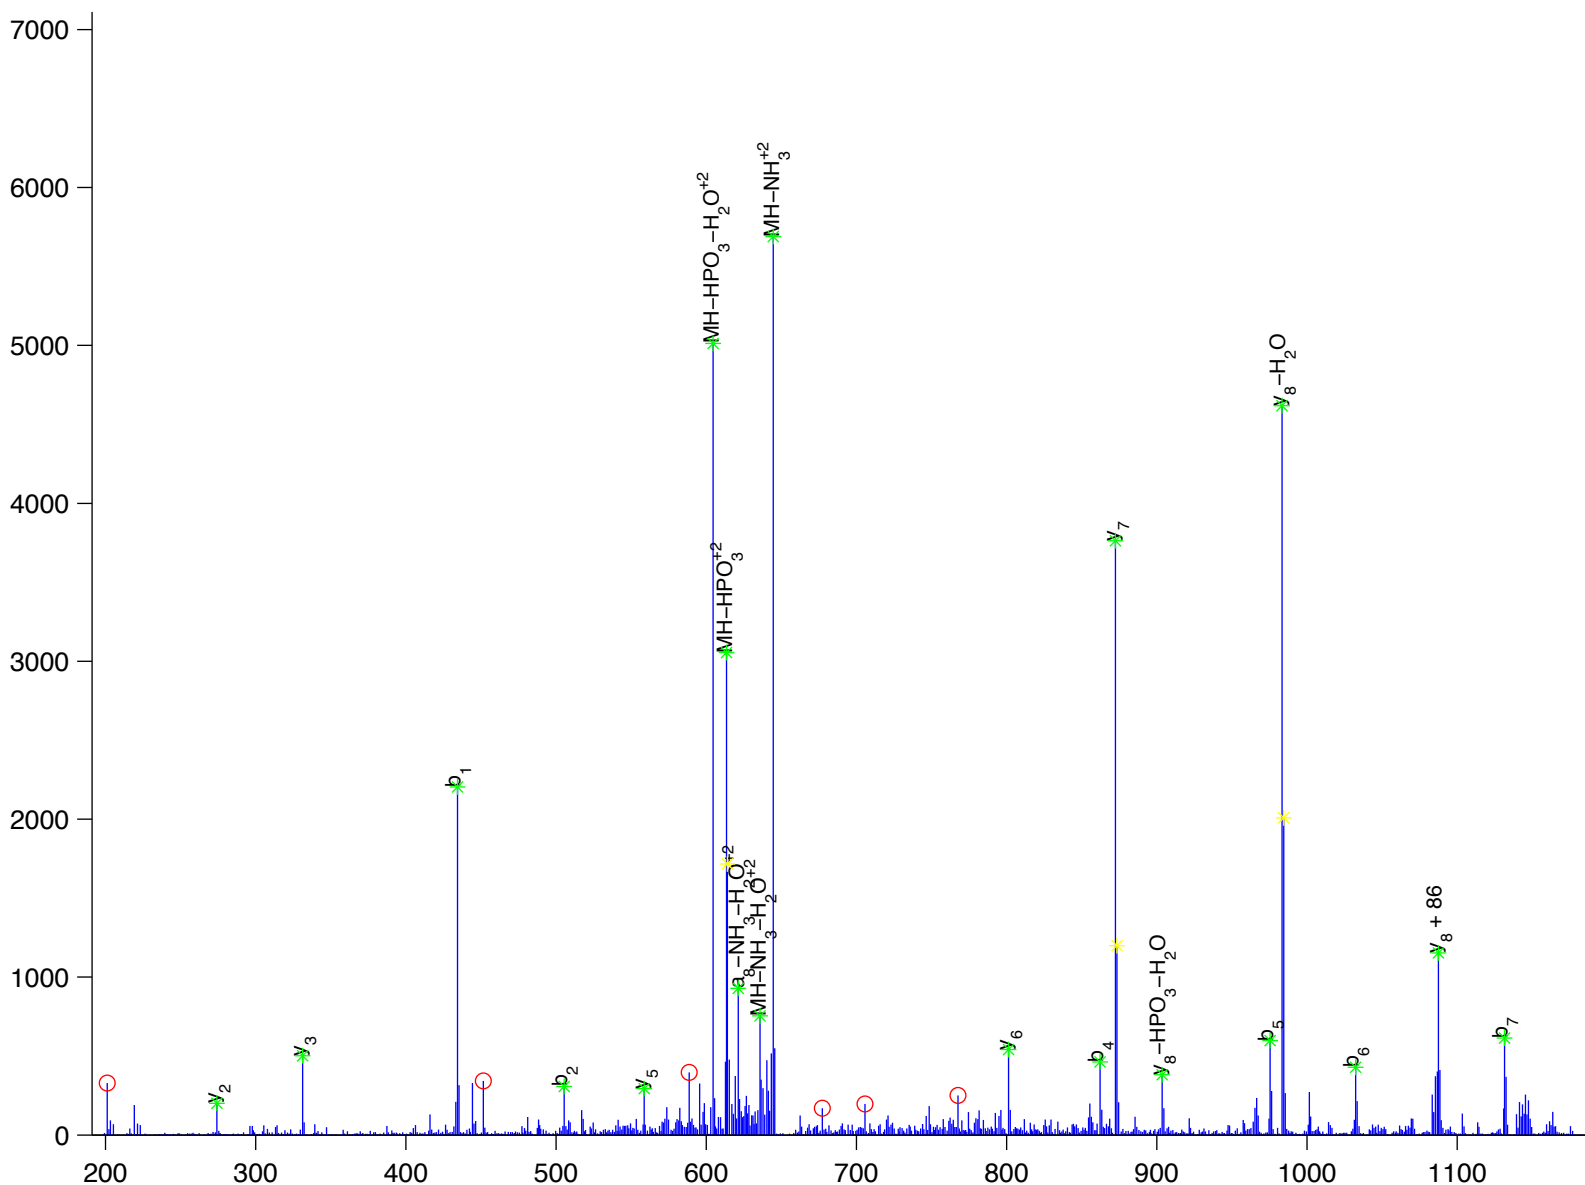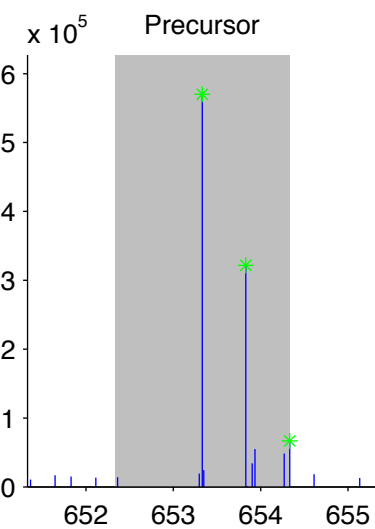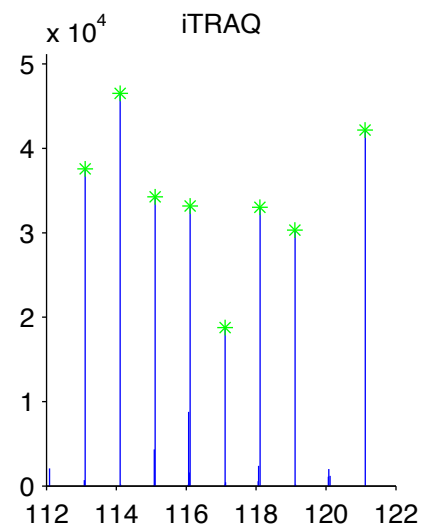

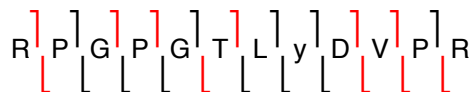

breast cancer anti-estrogen resistance 1

Charge State: +3

Scan Number: 4433

File Name: 091130ptp1blivers\_hfd\_basal2.raw

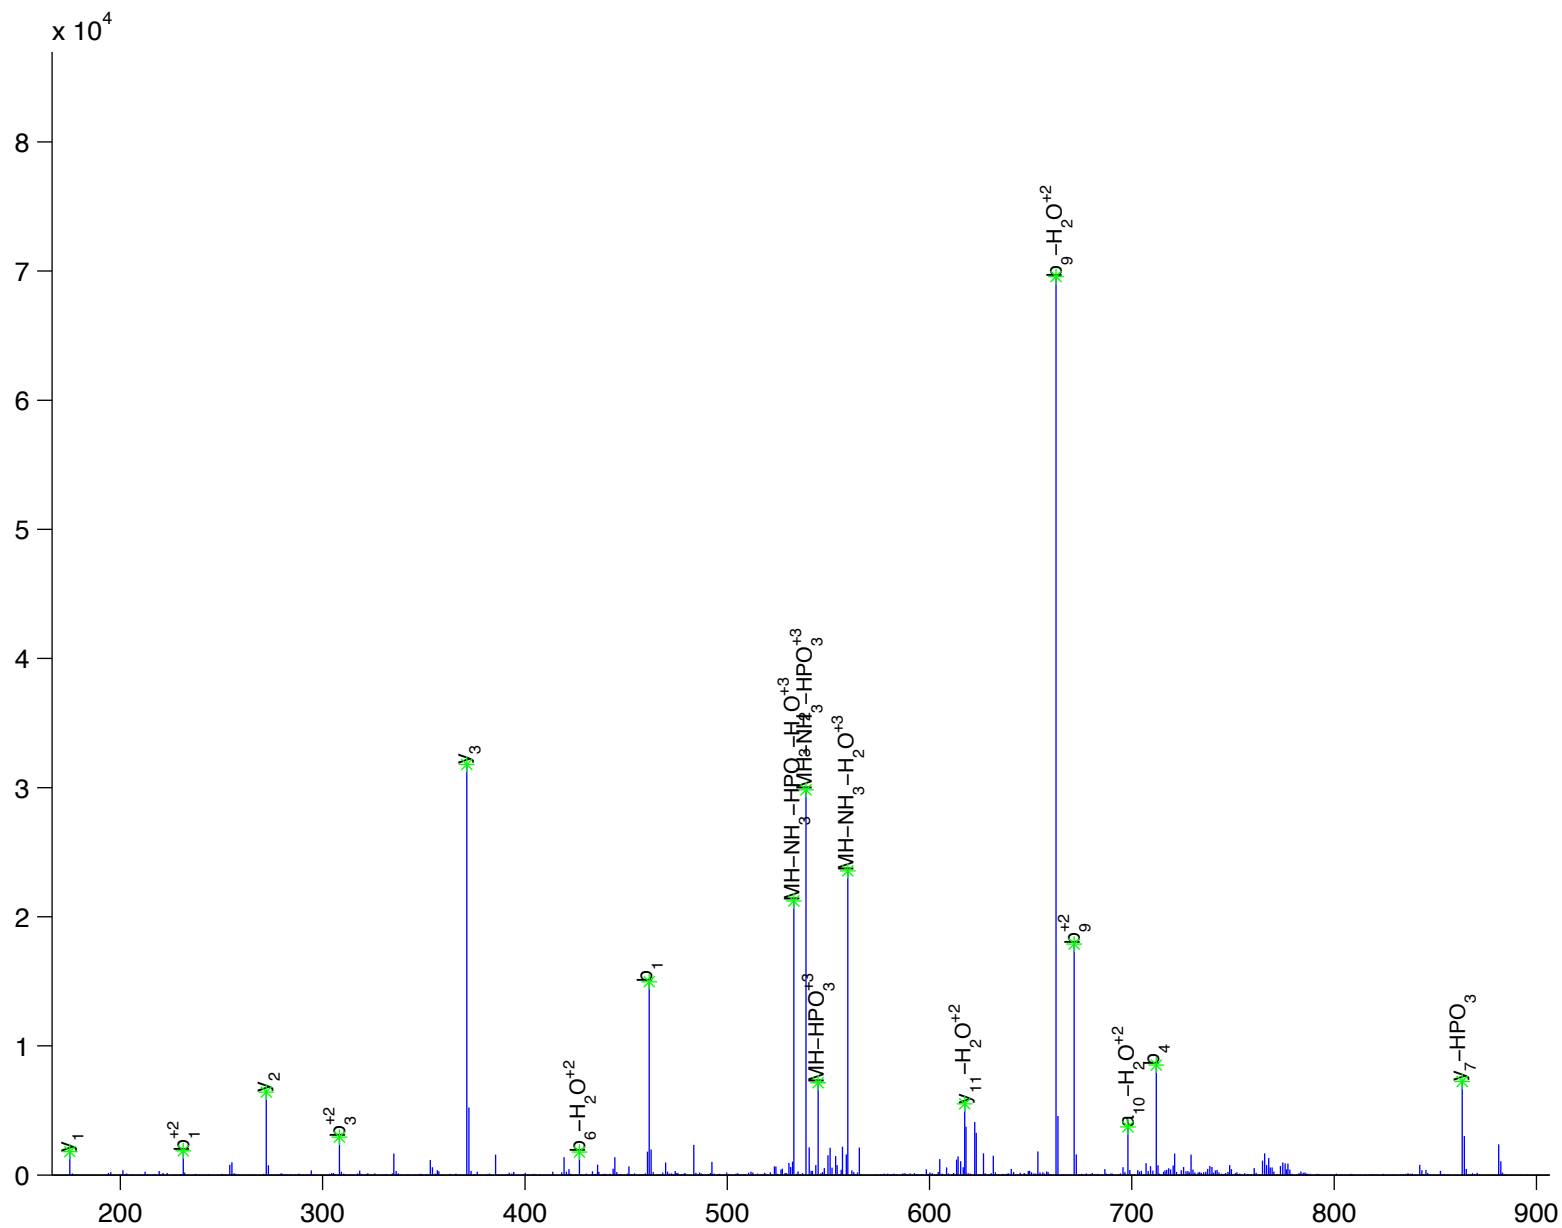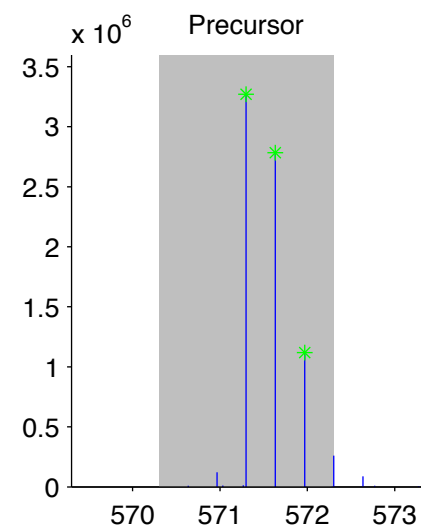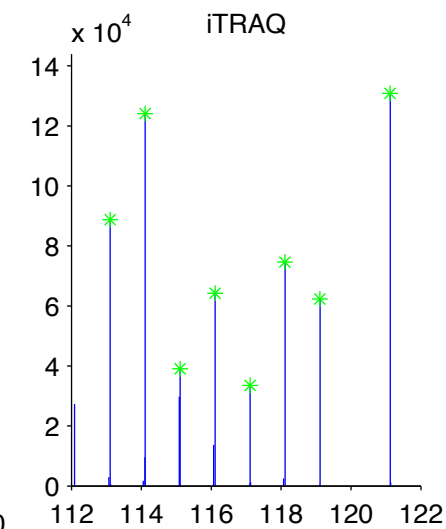



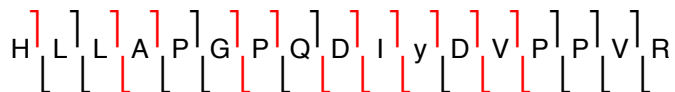

breast cancer anti-estrogen resistance 1

Charge State: +3

Scan Number: 6218

File Name: 091130ptp1blivers\_hfd\_basal2.raw

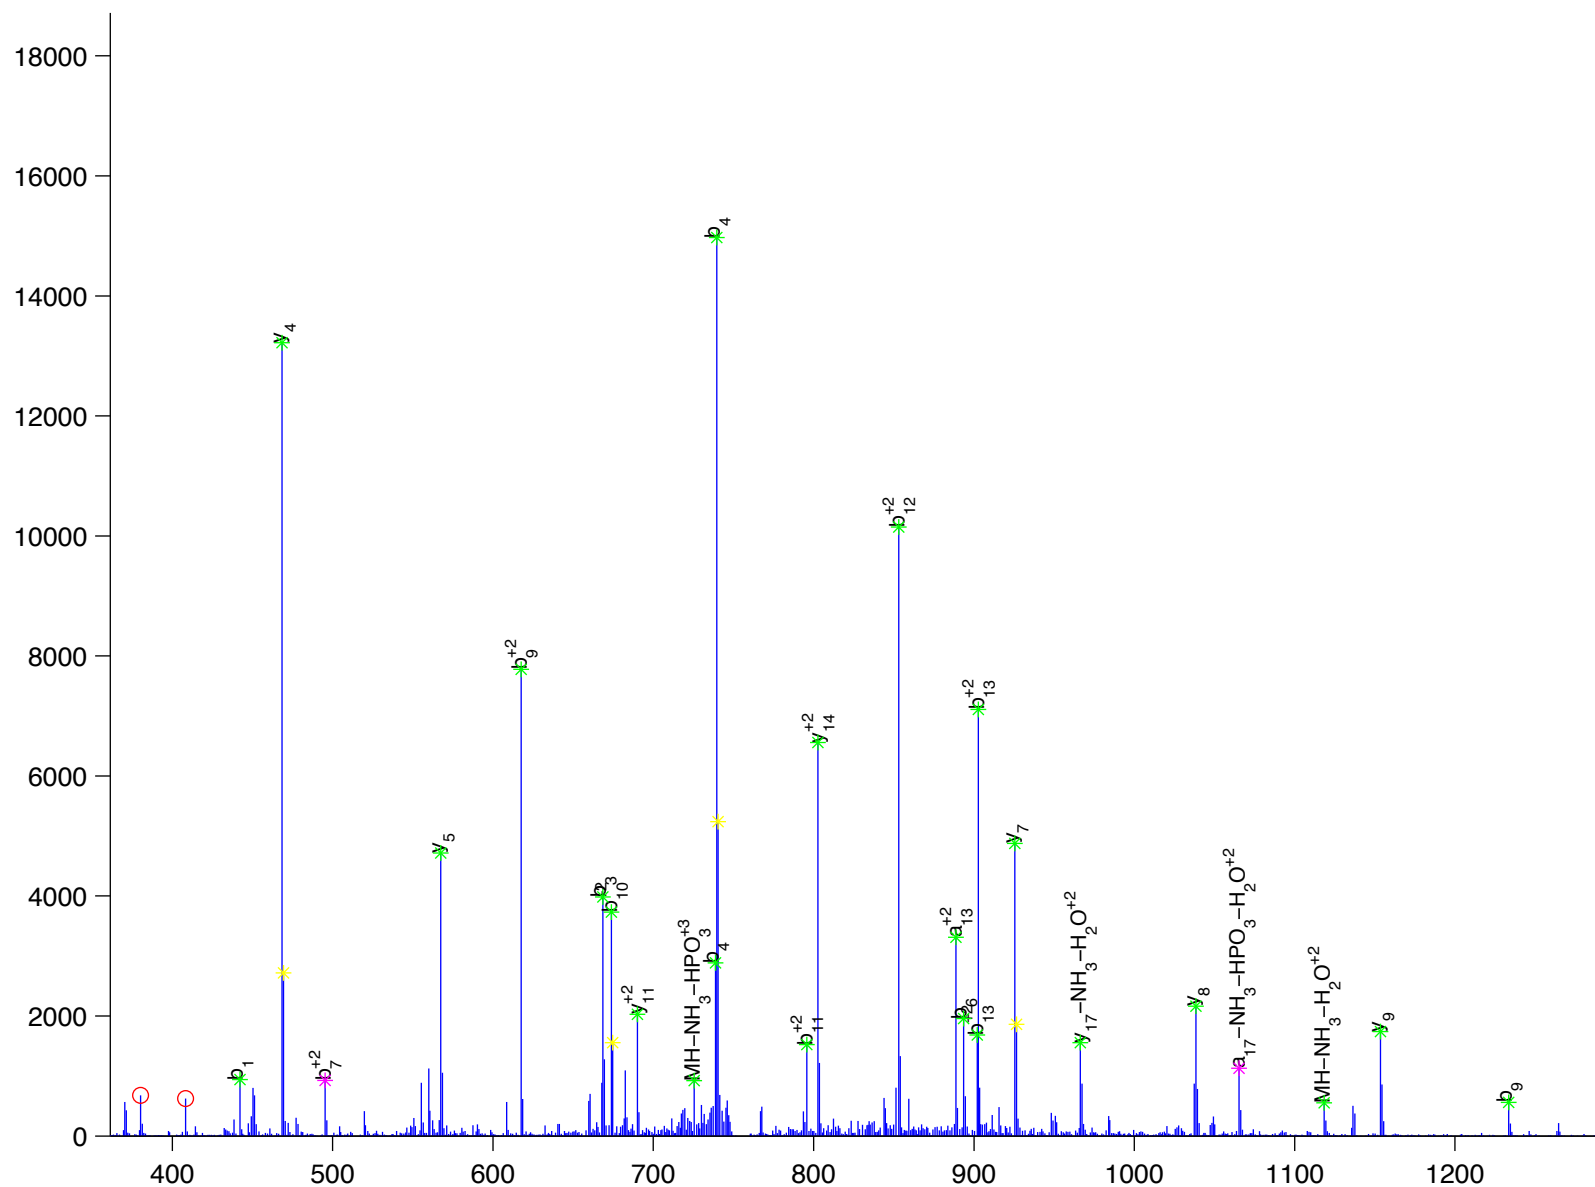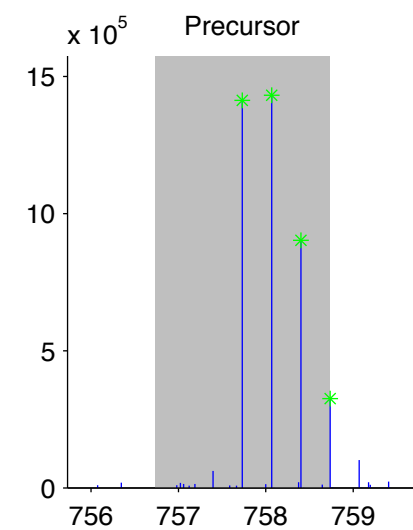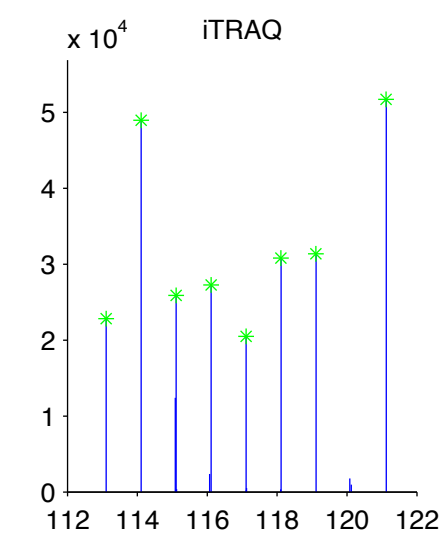



G [P] [N] [G] [R] [D] [P] [L] [L] [D] [V] y [D] [V] [P] [P] [S] [V] [E] [K]

breast cancer anti-estrogen resistance 1

Charge State: +3

Scan Number: 6253

File Name: 091130ptp1blivers\_hfd\_basal2.raw

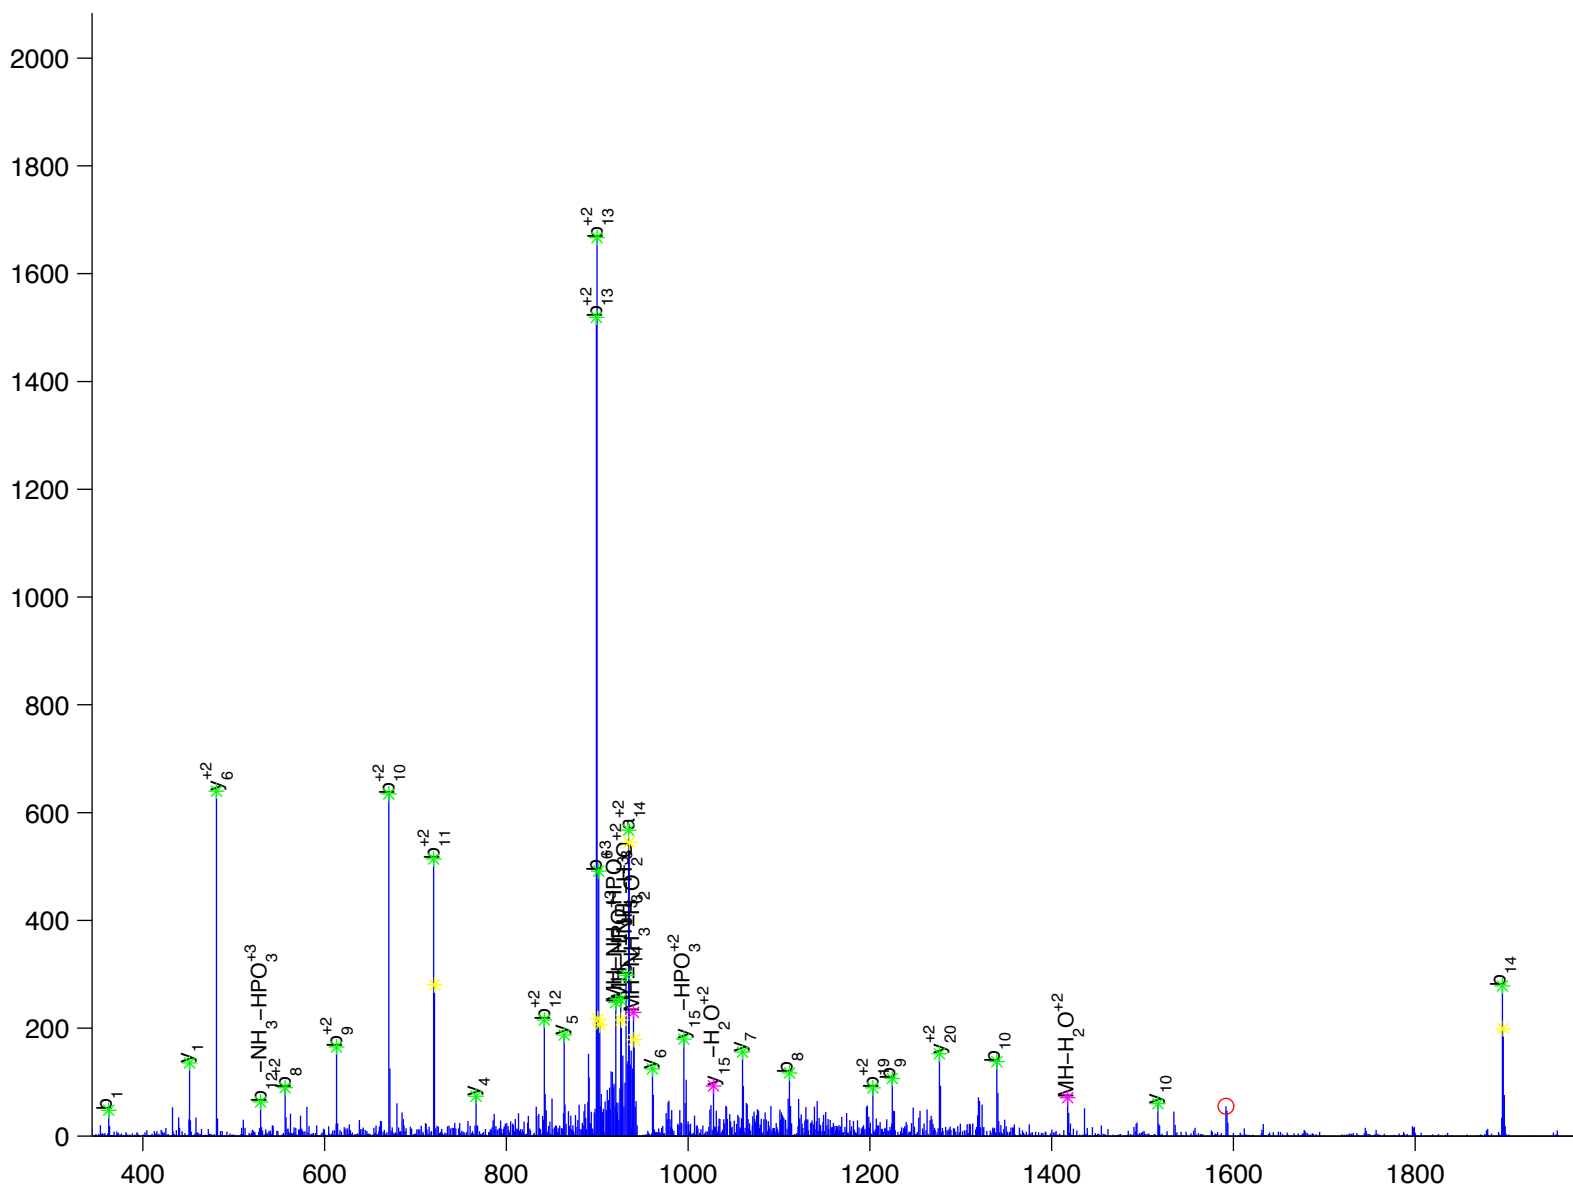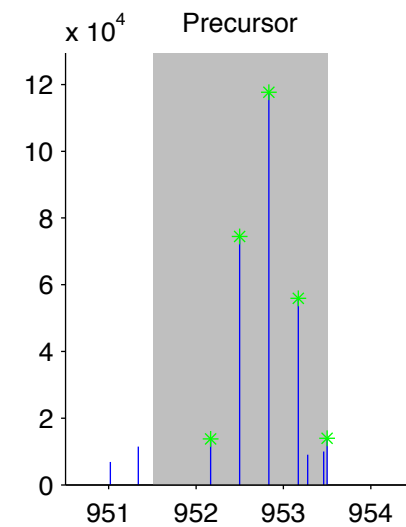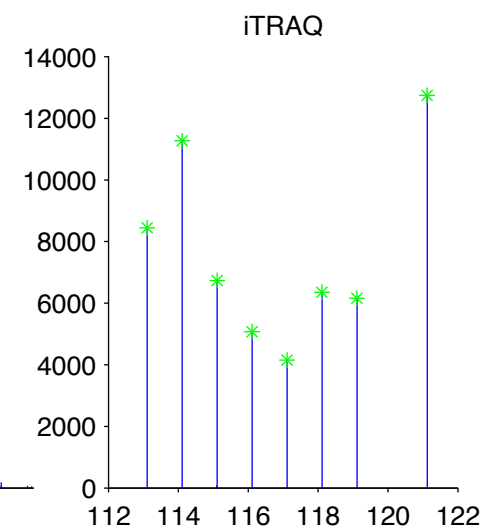

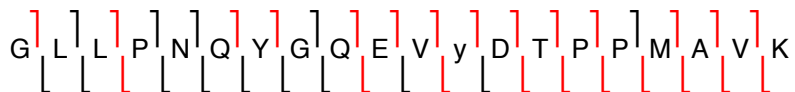

breast cancer anti-estrogen resistance 1

Charge State: +3

Scan Number: 6950

File Name: 091130ptp1blivers\_hfd\_basal2.raw

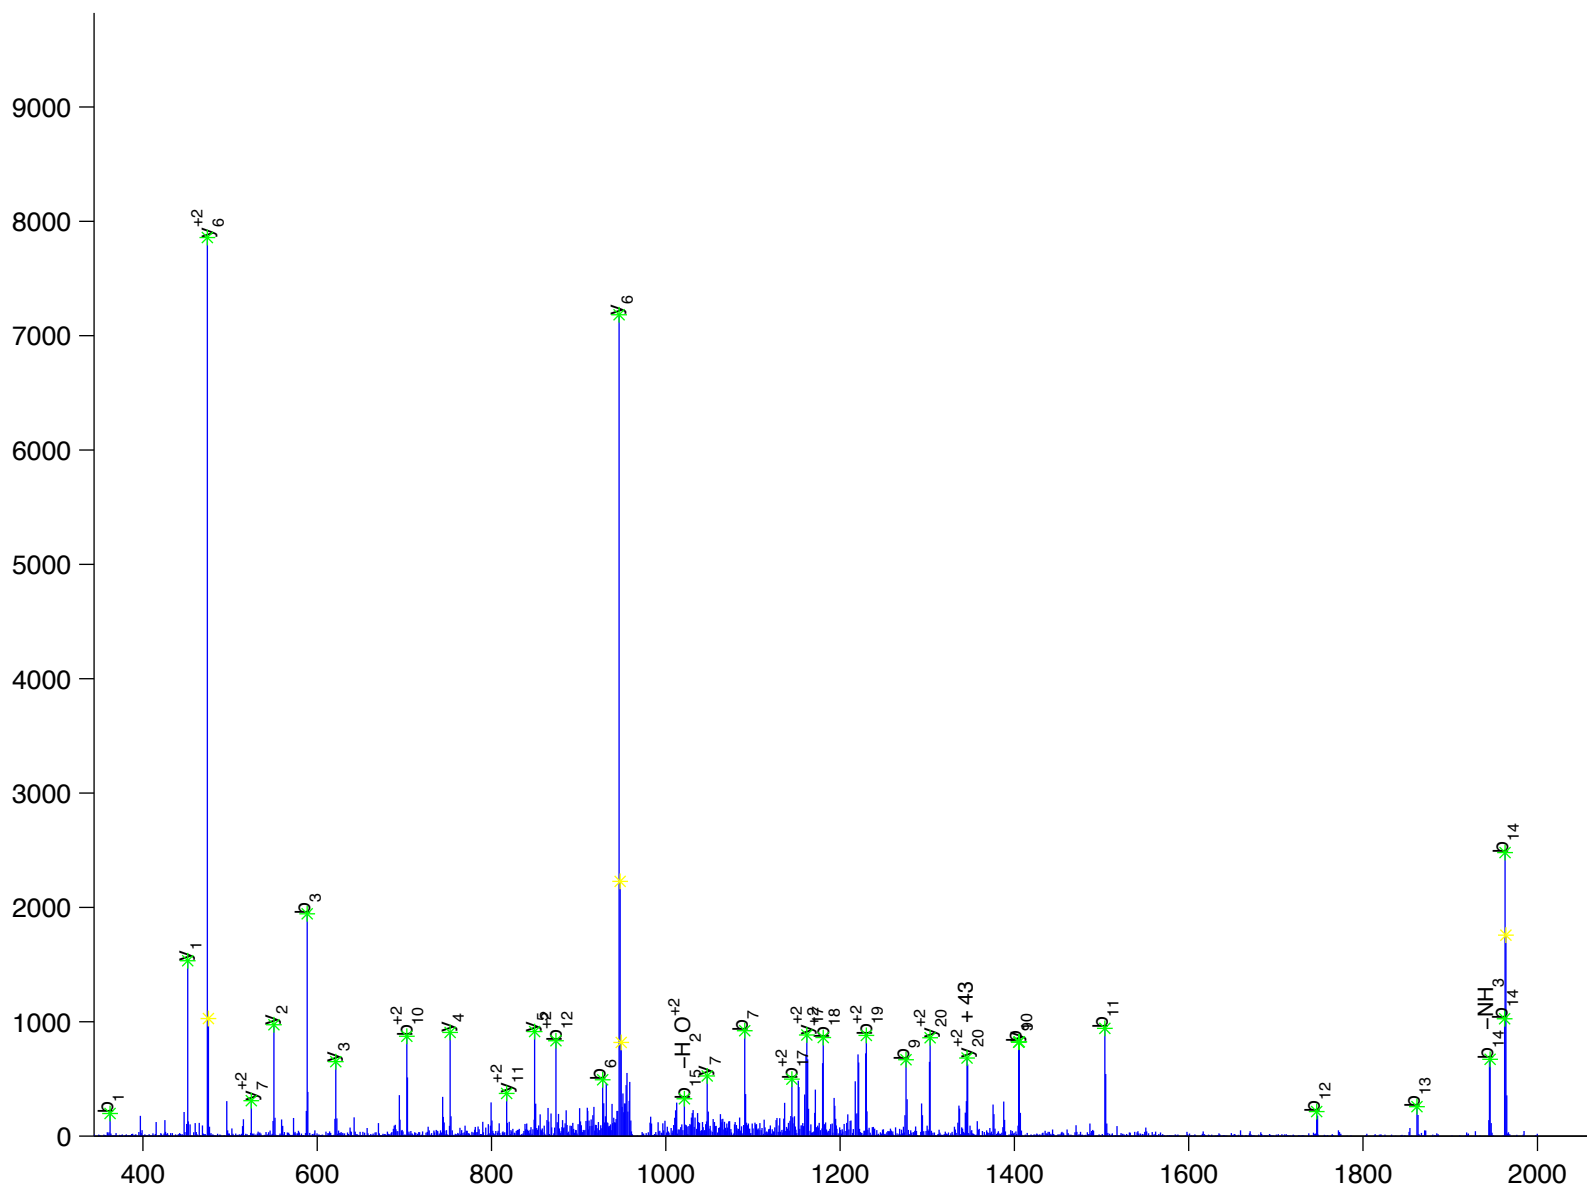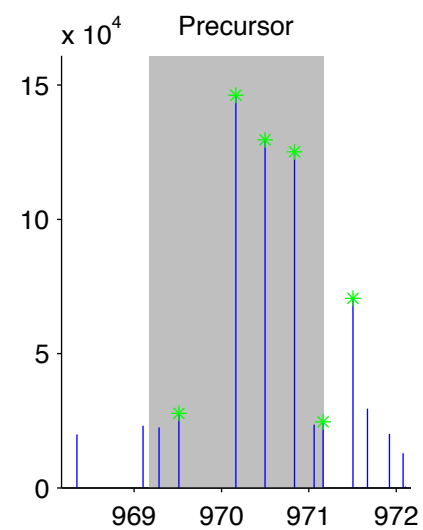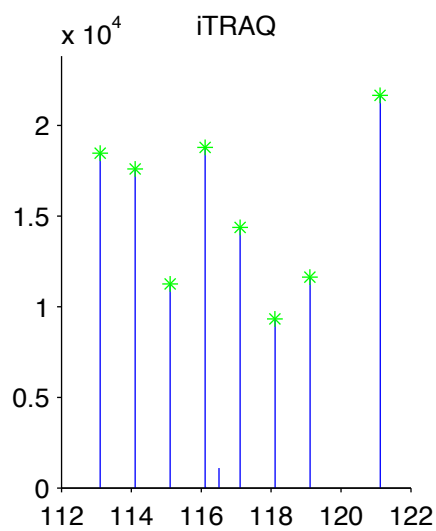

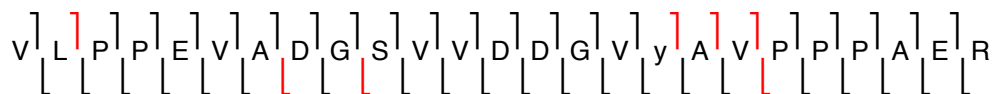

breast cancer anti-estrogen resistance 1

Charge State: +3

Scan Number: 7347

File Name: 091130ptp1blivers\_hfd\_basal2.raw

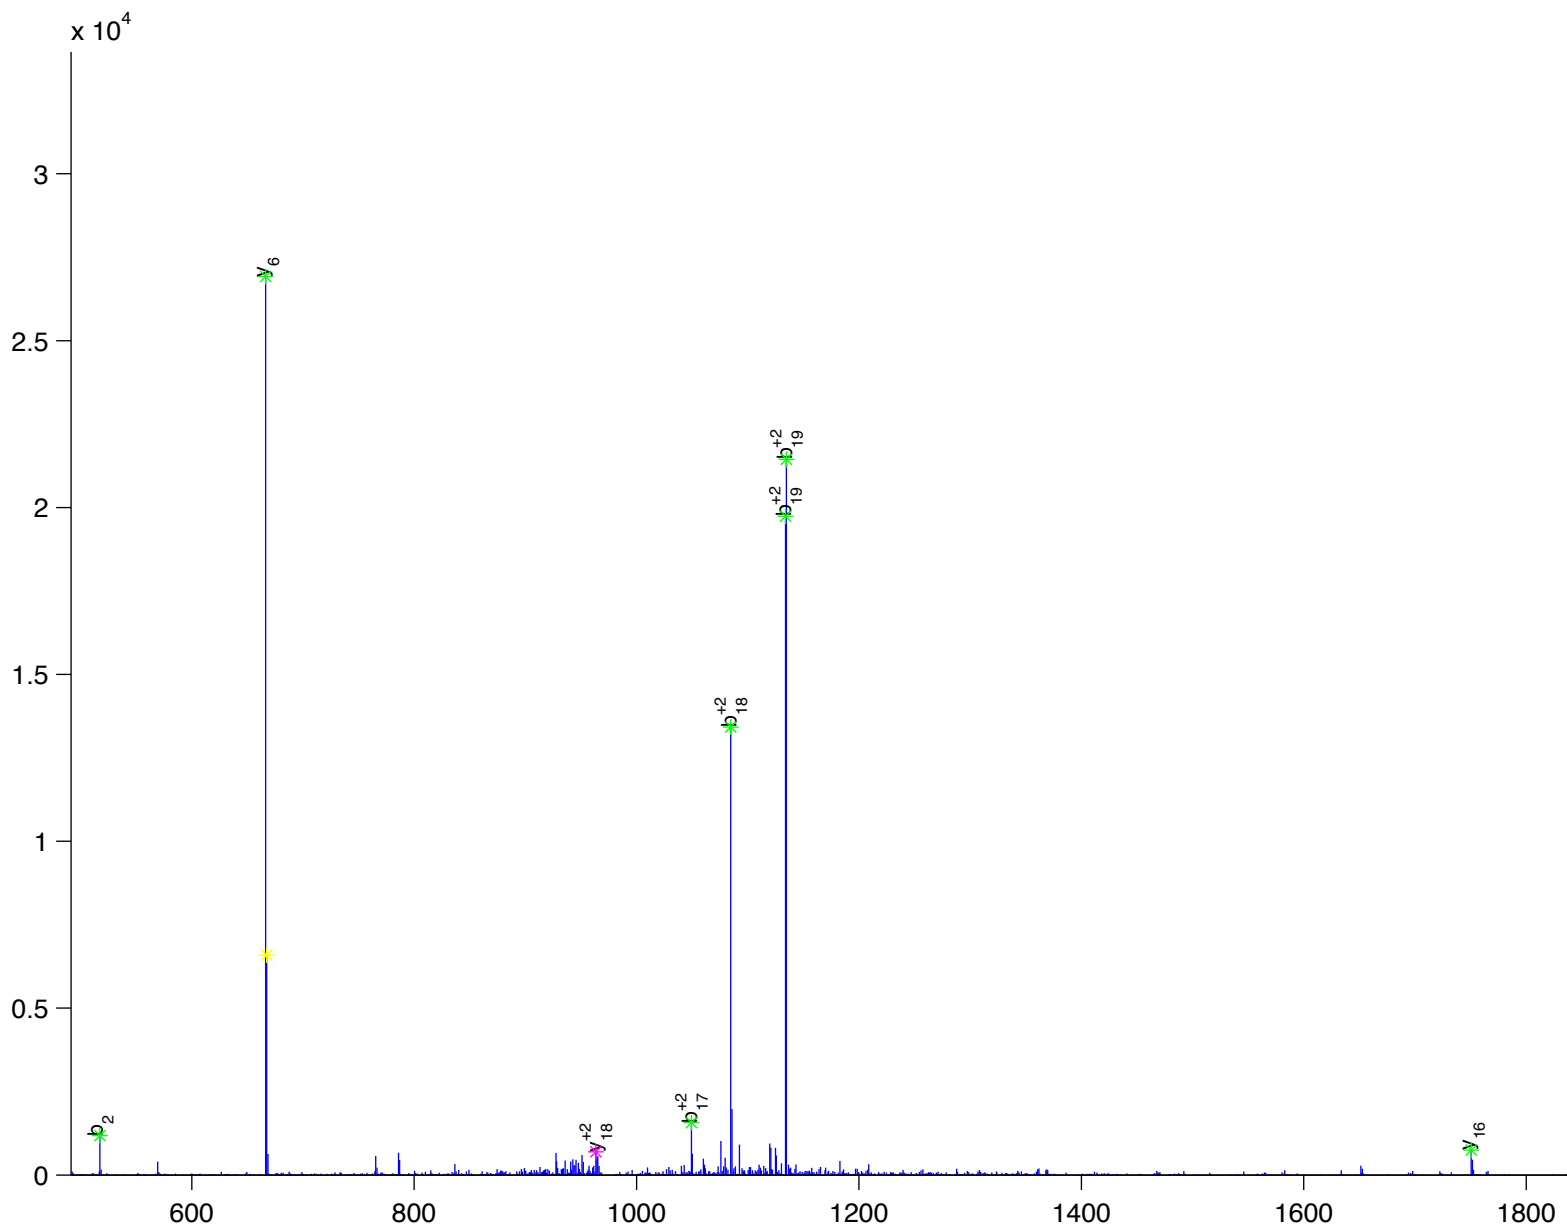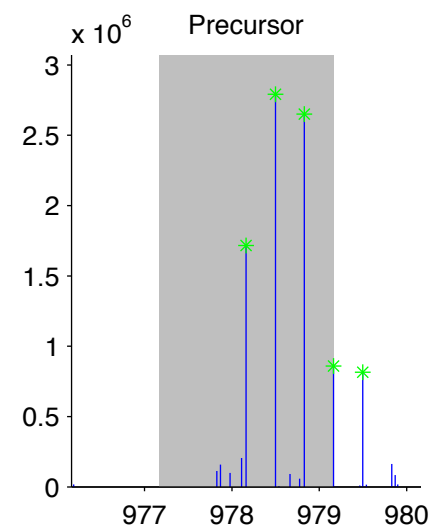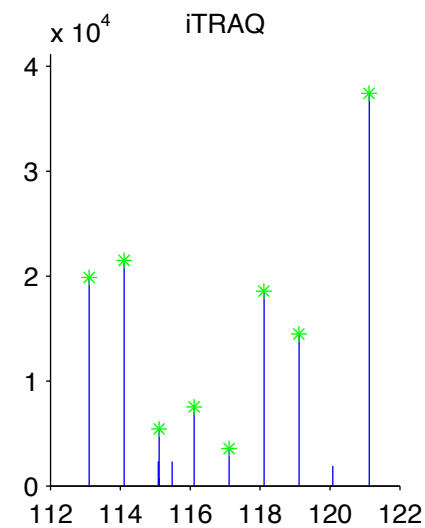

M [ E ] [ D ] [ V ] [ y ] [ Q ] [ T ] [ L ] [ V ] [ V ] [ H ] [ G ] [ Q ] [ V ] [ L ] [ D ] [ S ] [ G ] [ R ]

breast cancer anti-estrogen resistance 1

Charge State: +3

Scan Number: 7475

File Name: 091130ptp1blivers\_hfd\_basal2.raw

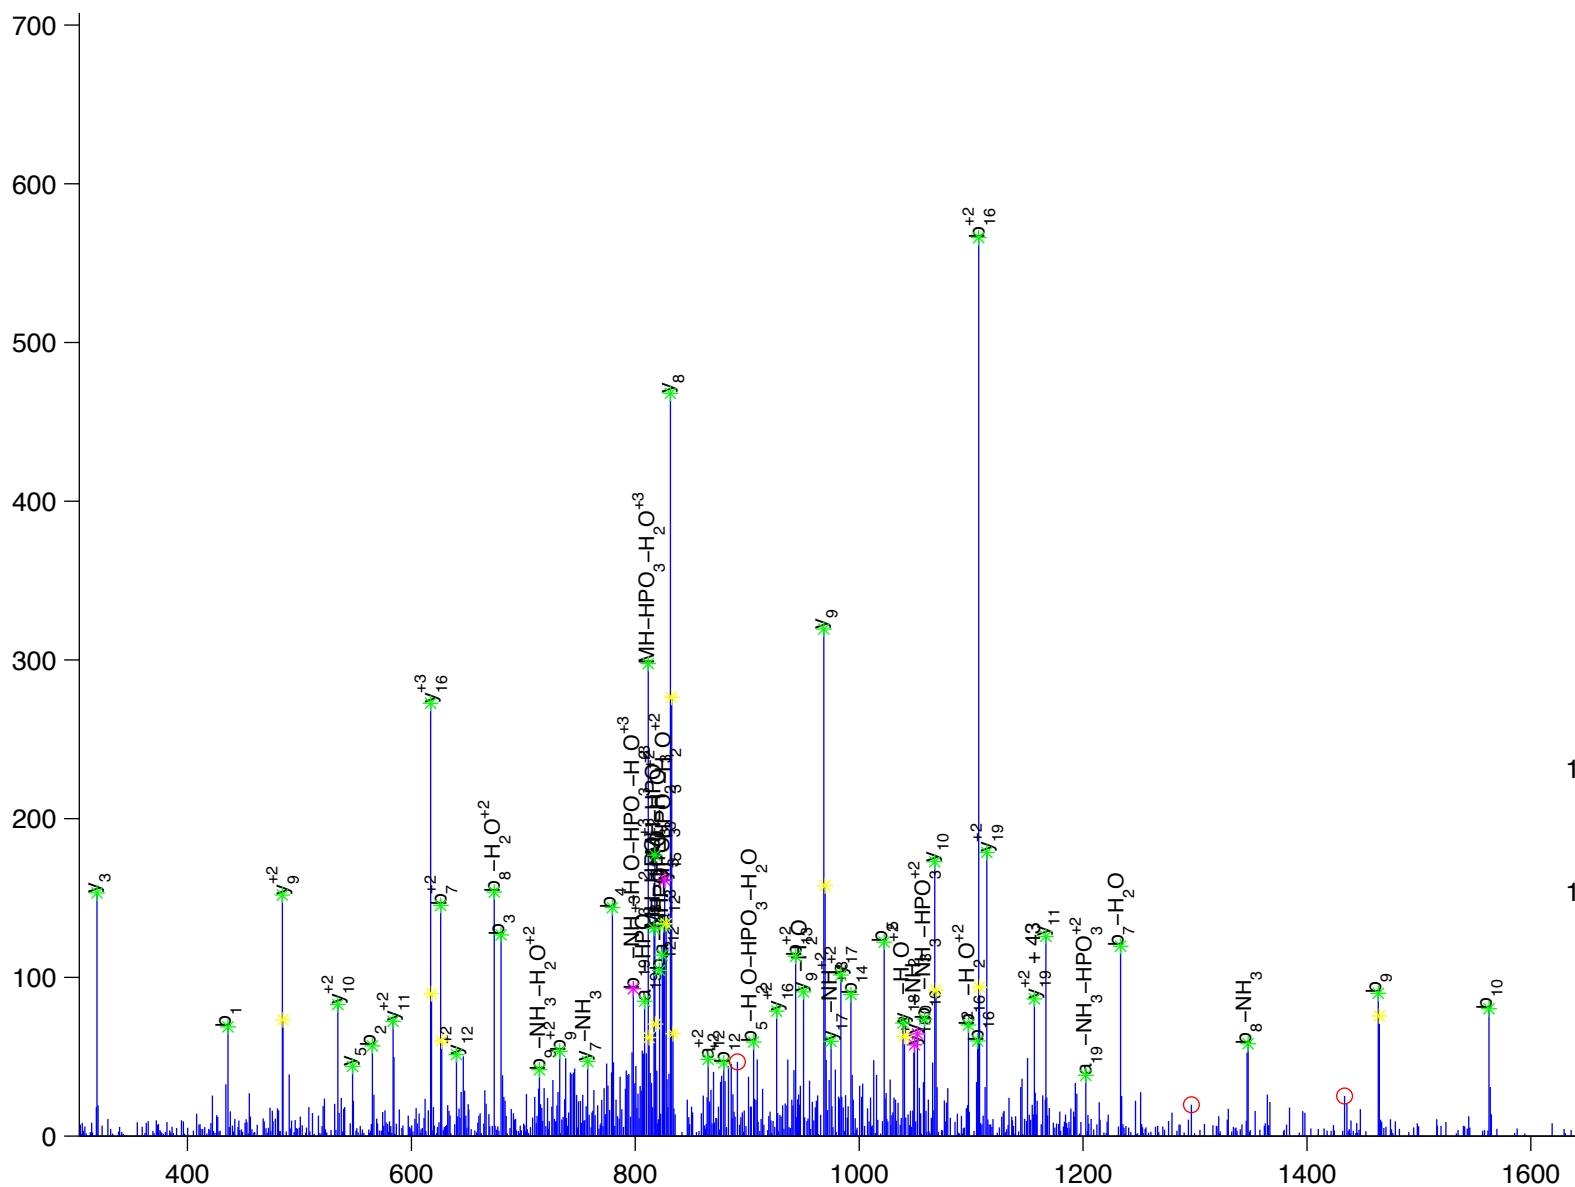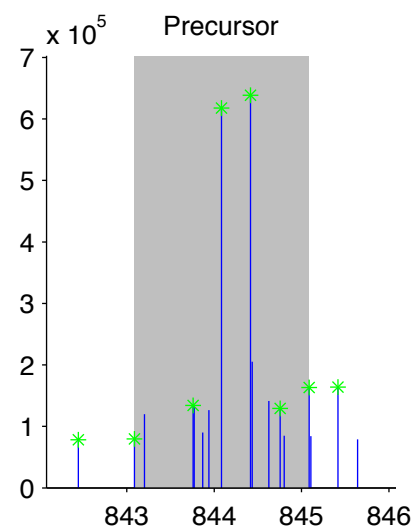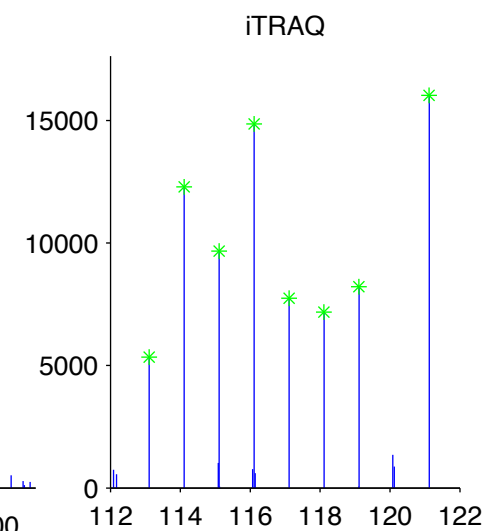

T[P]P[S]P[S]P[W]L[T]S[E]A[N]y[C]E[L]N[P]A[F]A[V]G[C]D]R

breast cancer anti-estrogen resistance 3

Charge State: +4

Scan Number: 5633

File Name: 100908ptp1blivers\_ncHFD3\_basal.raw

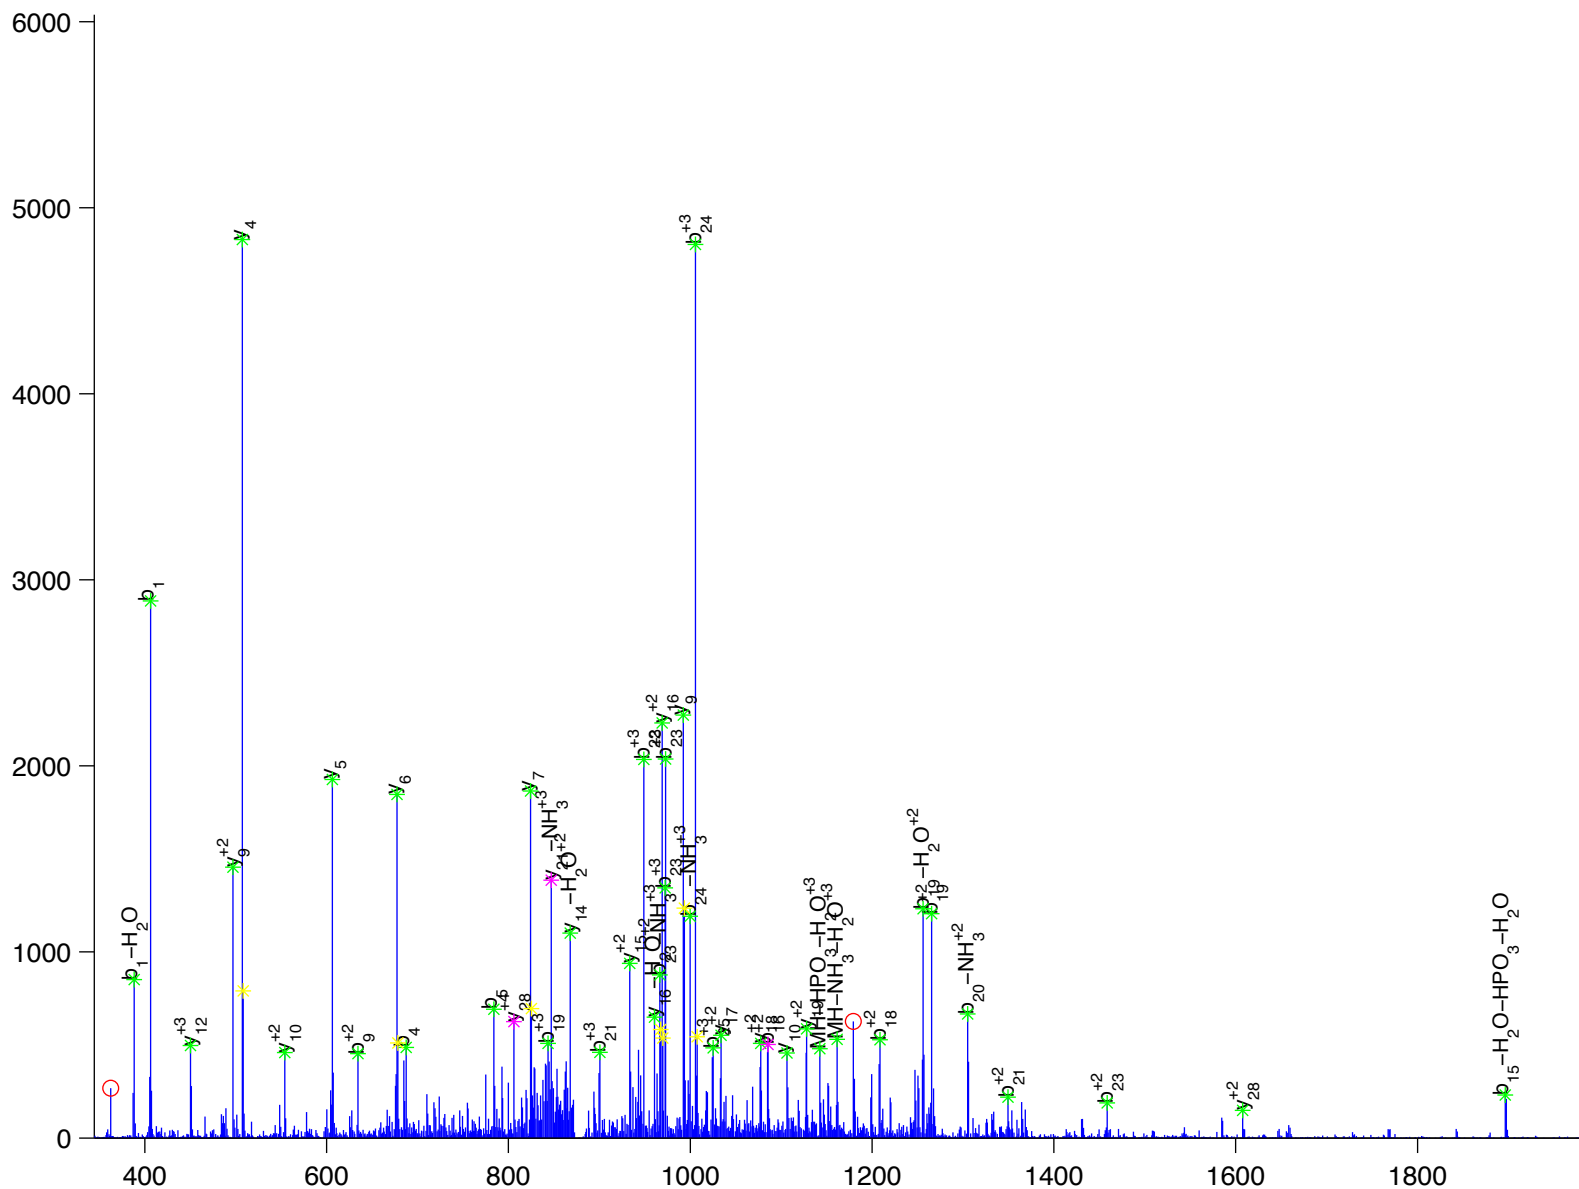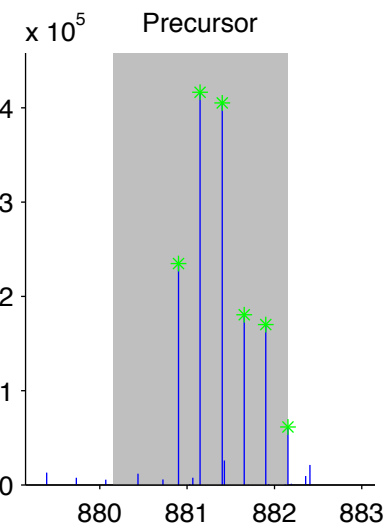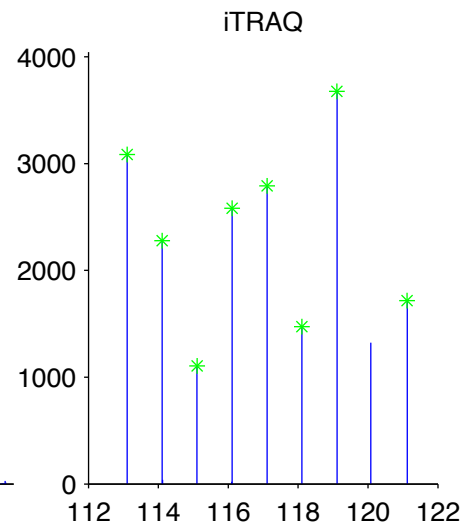

V[G]Q[G]Y[V]Y[E]A[A]Q[T]E[Q]D[E]y[D]T[P]R

breast cancer anti-estrogen resistance 3

Charge State: +3

Scan Number: 5579

File Name: 090806ptp1blivers\_M\_NC2.raw

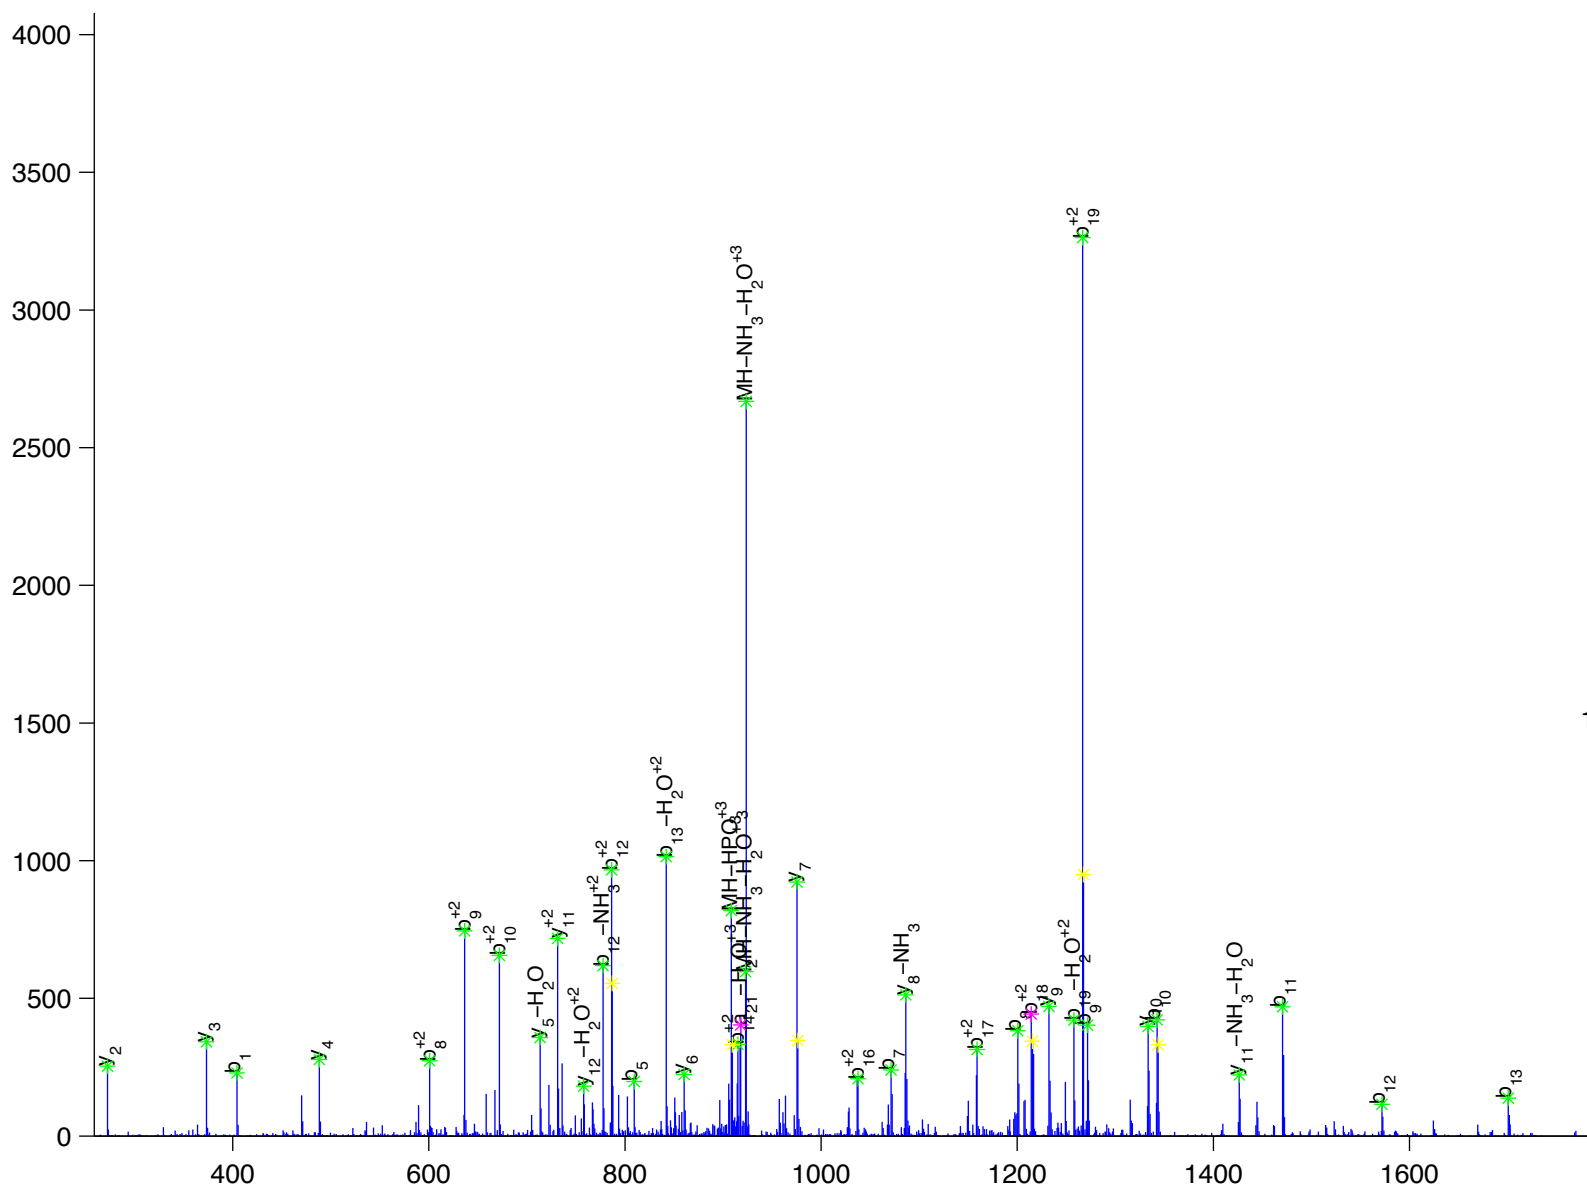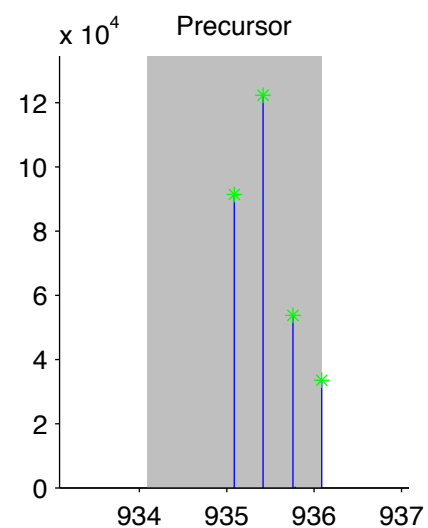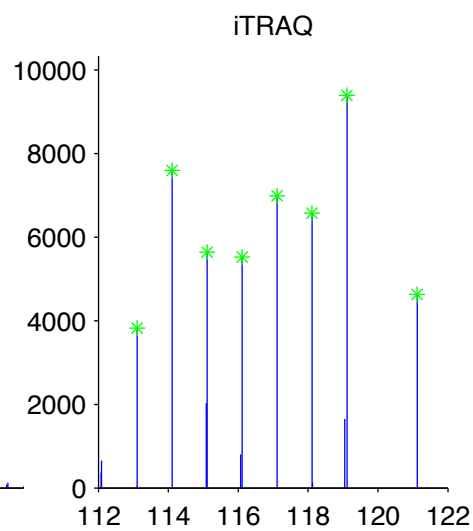

V [ G ] [ E ] [ E ] [ G ] [ H ] [ E ] [ G ] [ C ] [ S ] y [ A ] V [ C ] [ S ] [ E ] [ G ] [ R ]

C1 domain-containing phosphatase and tensin-like protein

Charge State: +3

Scan Number: 3704

File Name: 091130ptp1blivers\_hfd\_basal2.raw

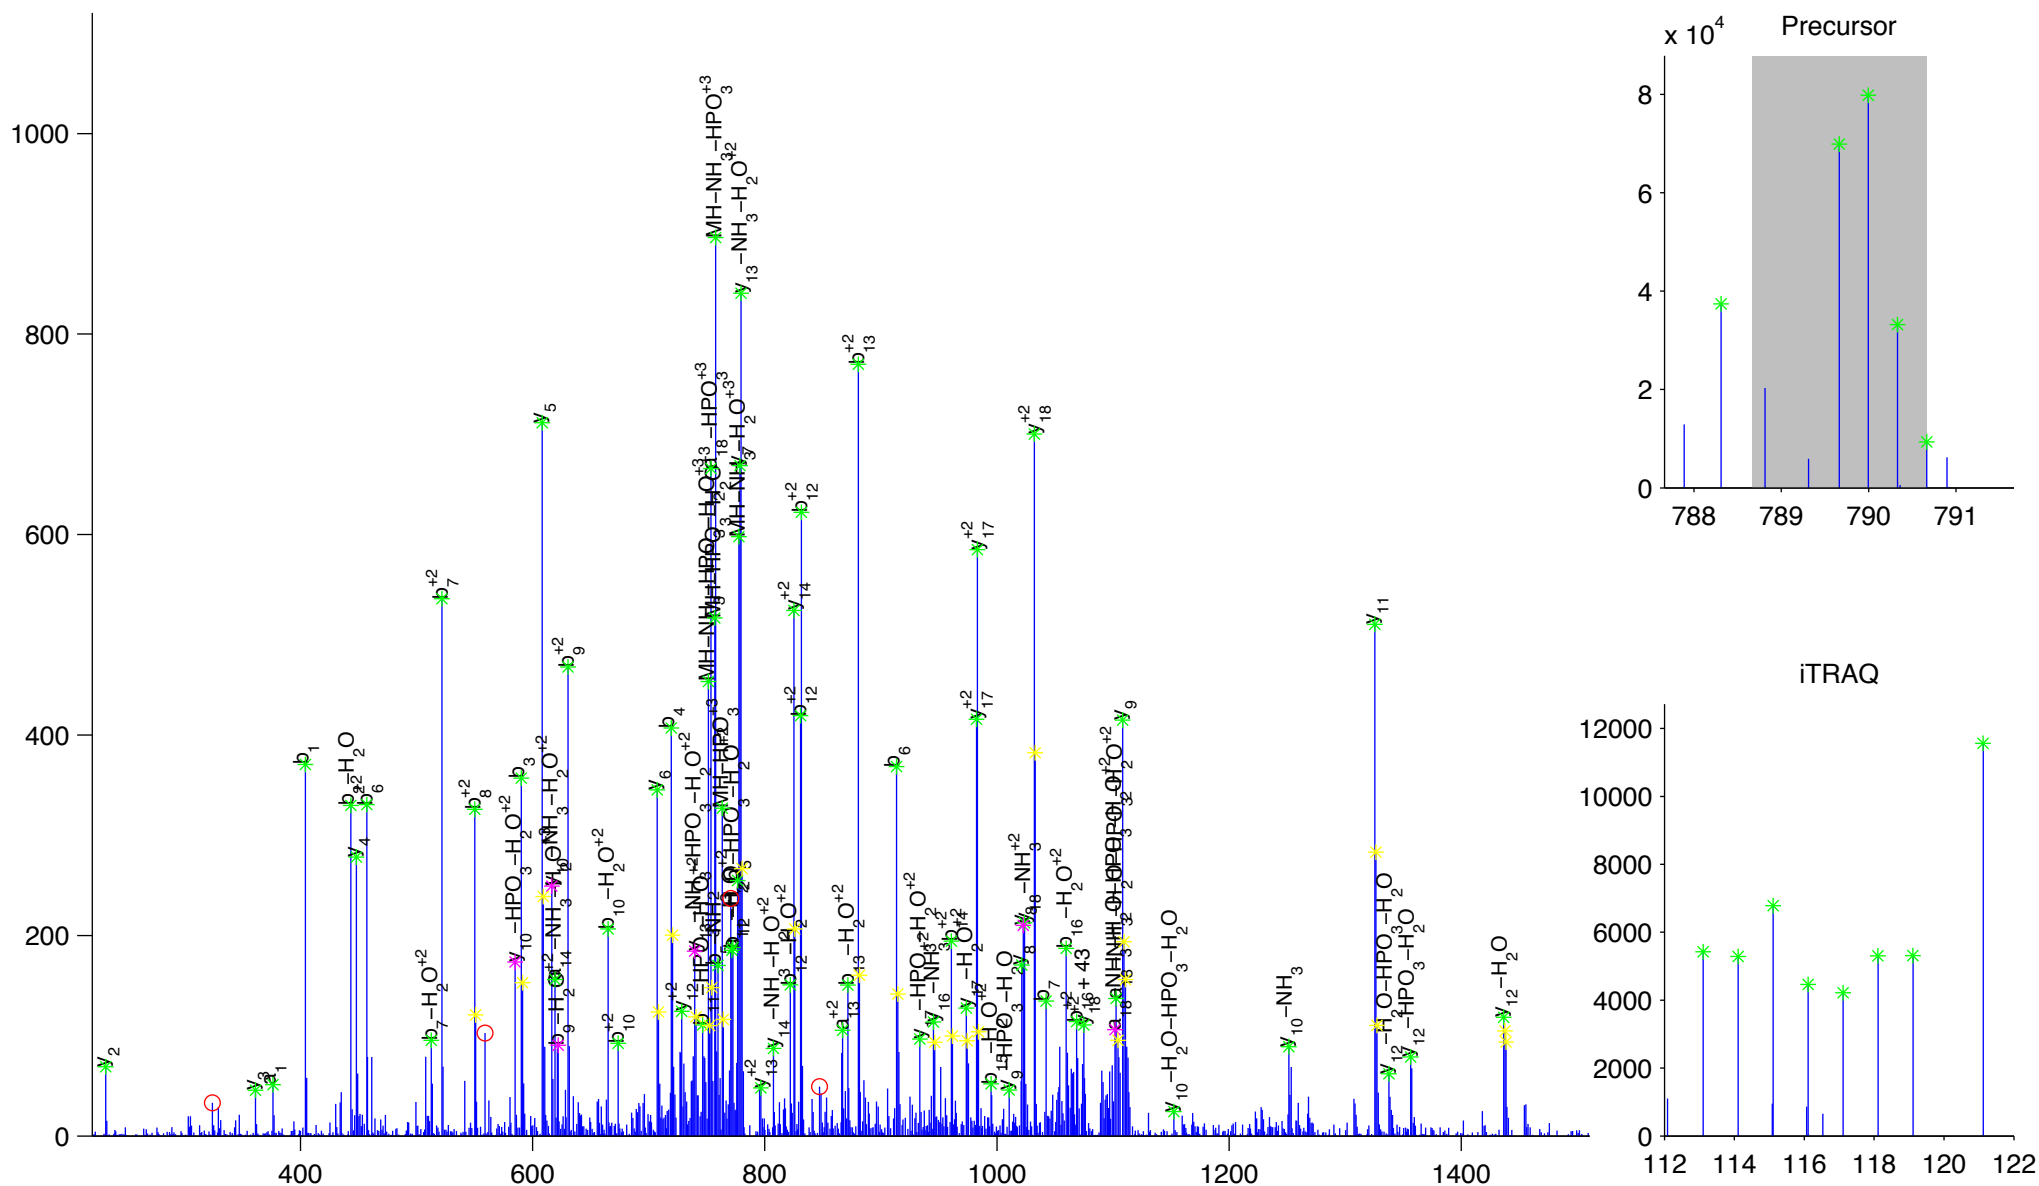

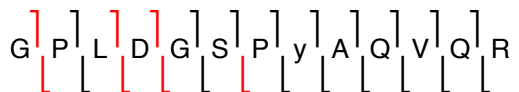

C1 domain-containing phosphatase and tensin-like protein

Charge State: +2

Scan Number: 5124

File Name: 0090807ptp1blivers\_M\_HFD2.raw

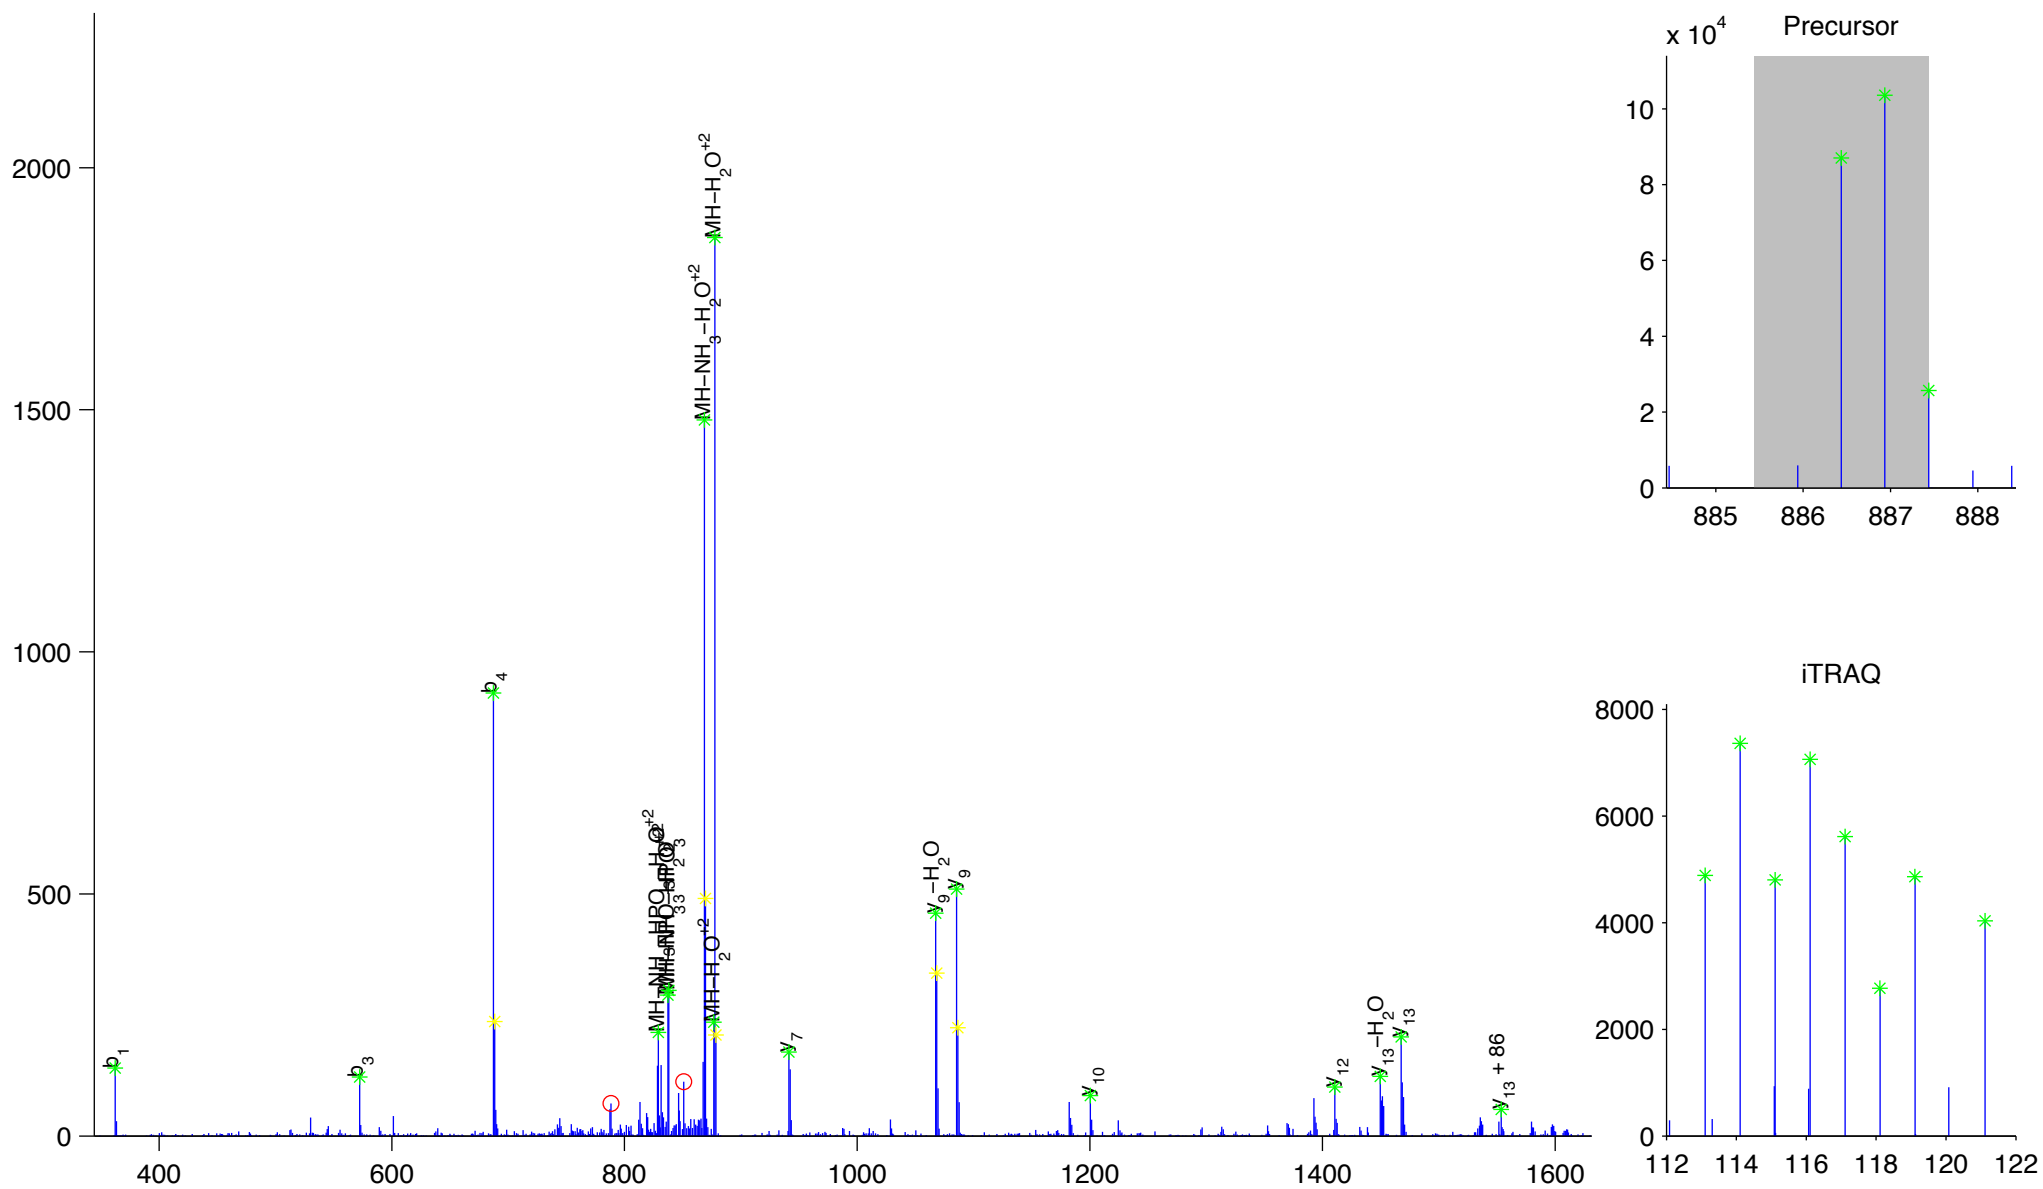



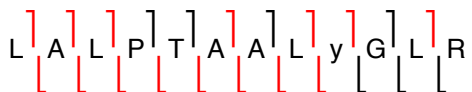

C1 domain-containing phosphatase and tensin-like protein

Charge State: +2

Scan Number: 8570

File Name: 091130ptp1blivers\_hfd\_basal2.raw

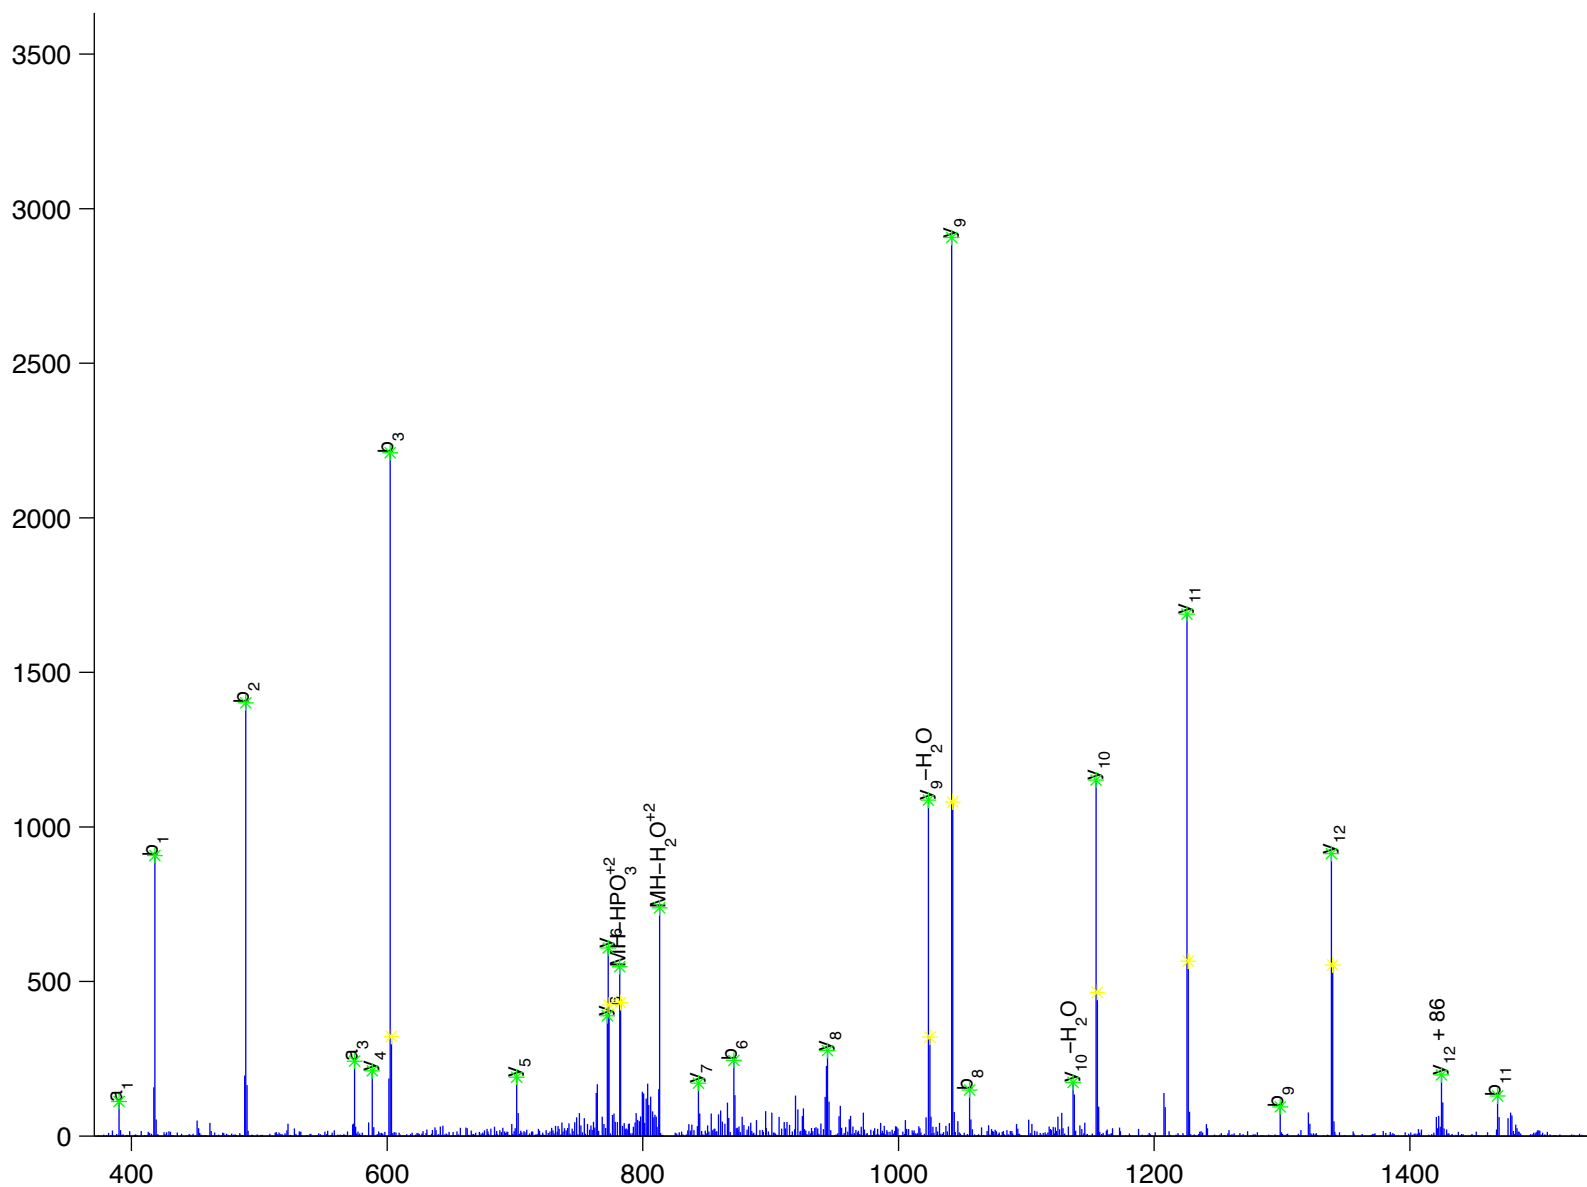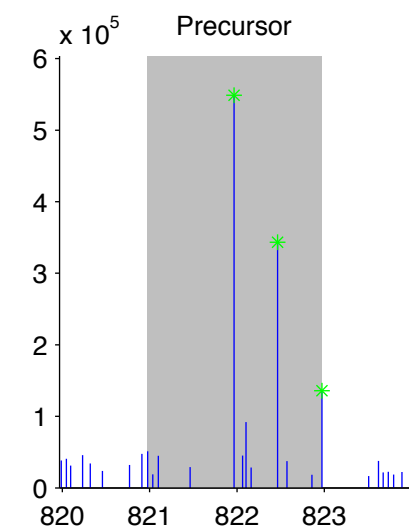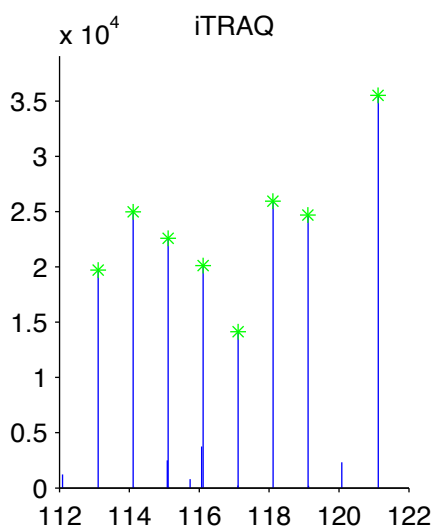

V[F]D[K]D[G]N[G]y[I]S[A]A[E]L[R]

calmodulin 2

Charge State: +3

Scan Number: 5776

File Name: 090806ptp1blivers\_M\_NC2.raw

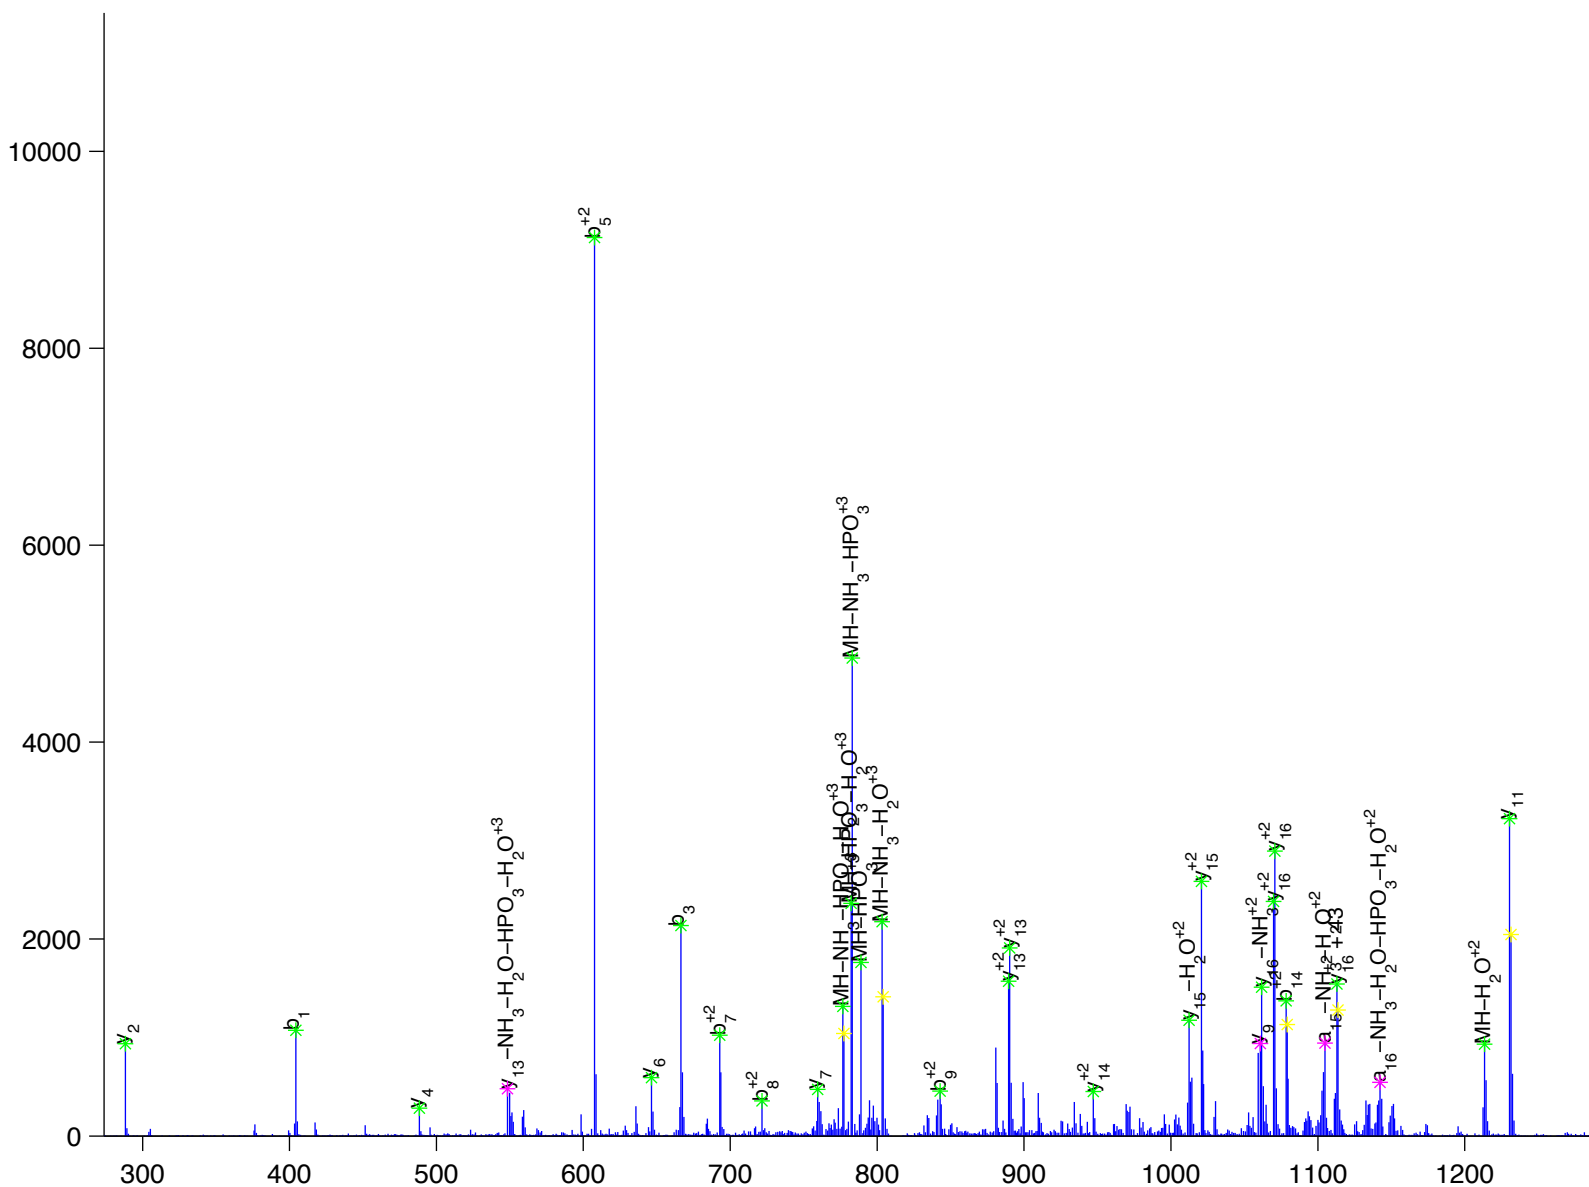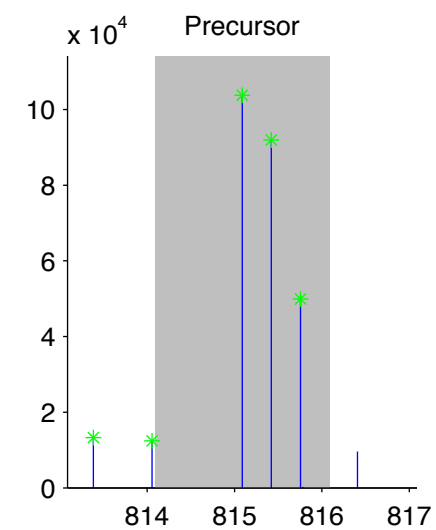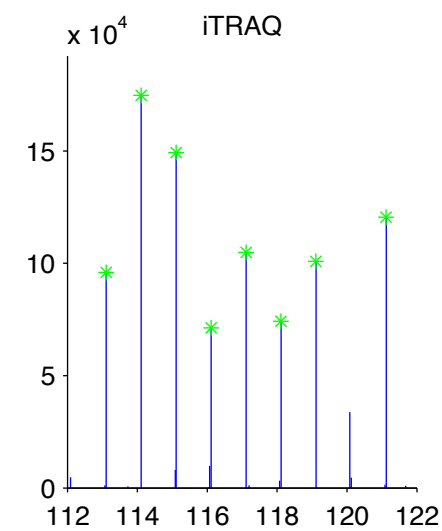

V[A]G[L]L[V]L[N]y[S]N[D]Y[N]H[W]L[A]T[K]

carbamoyl-phosphate synthetase 1

Charge State: +4

Scan Number: 11710

File Name: 090807ptp1blivers\_M\_HFD\_basal.raw

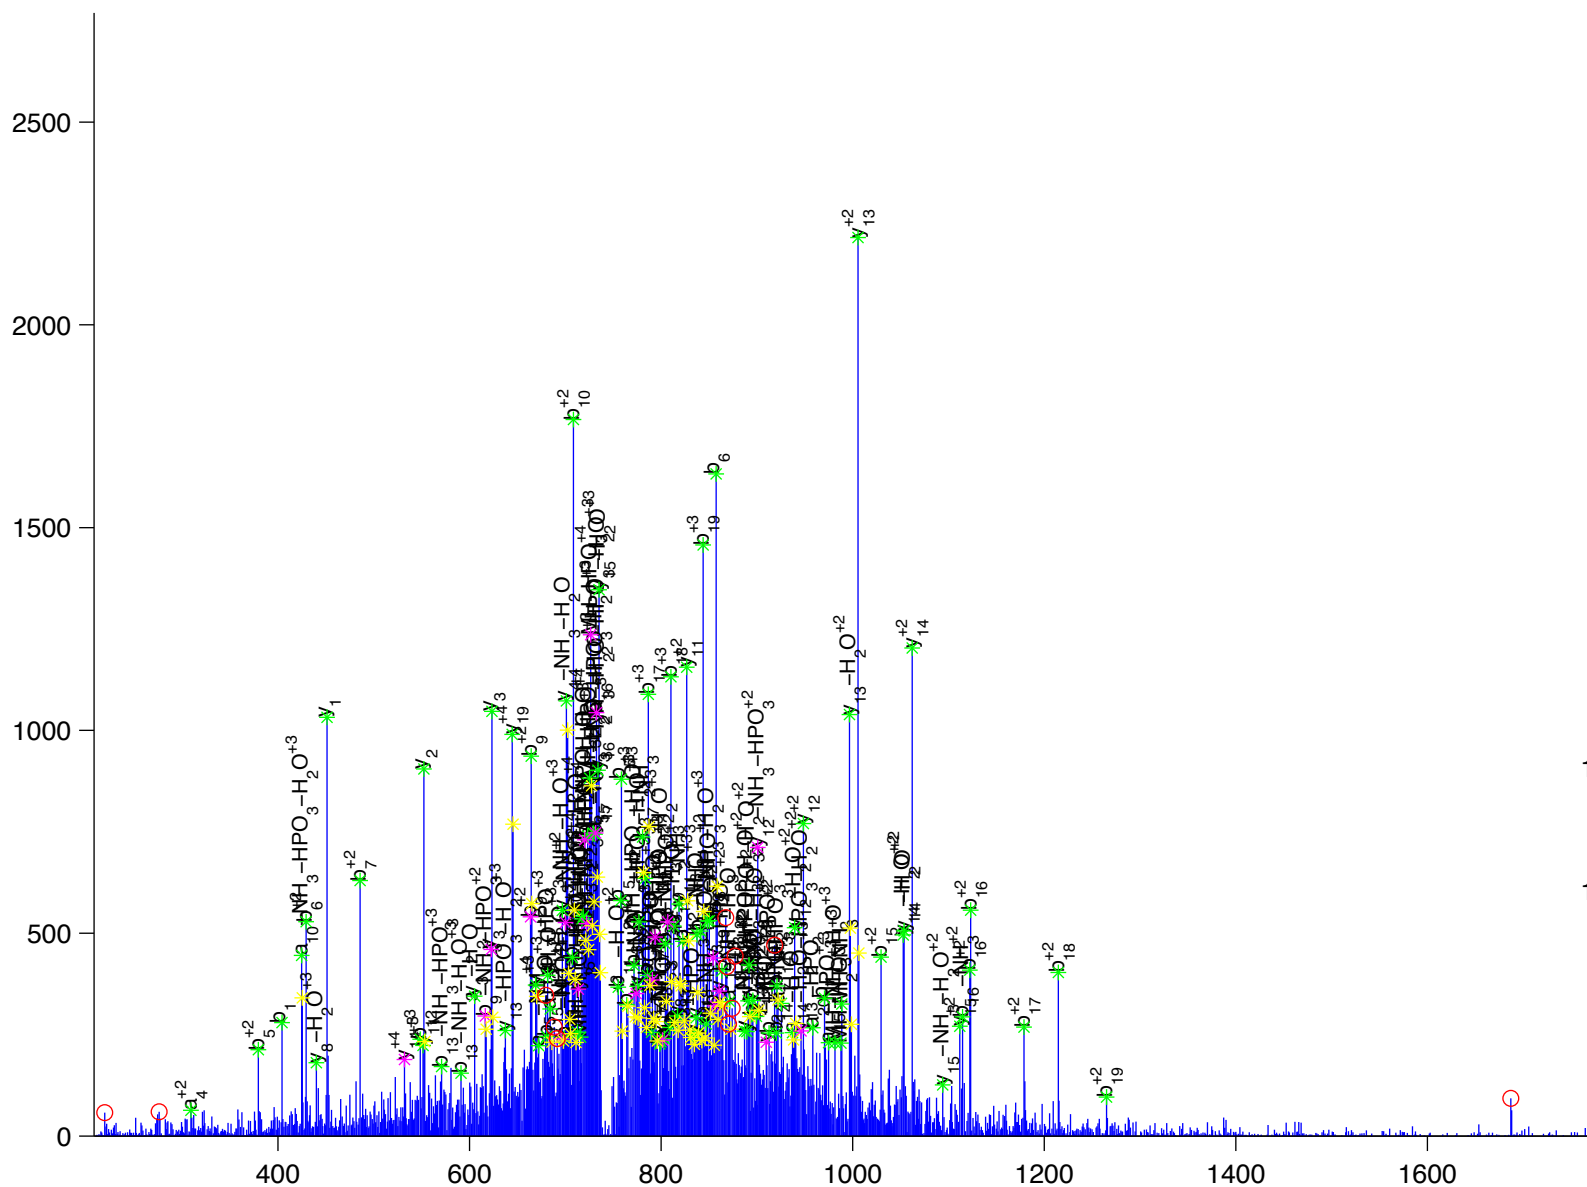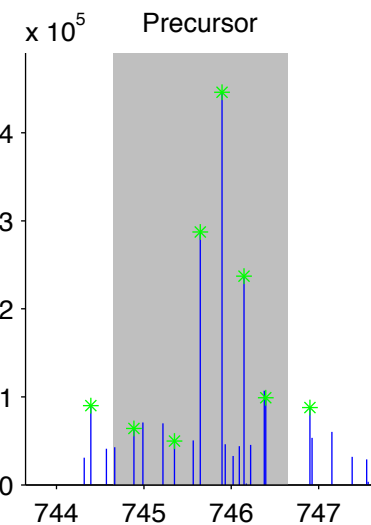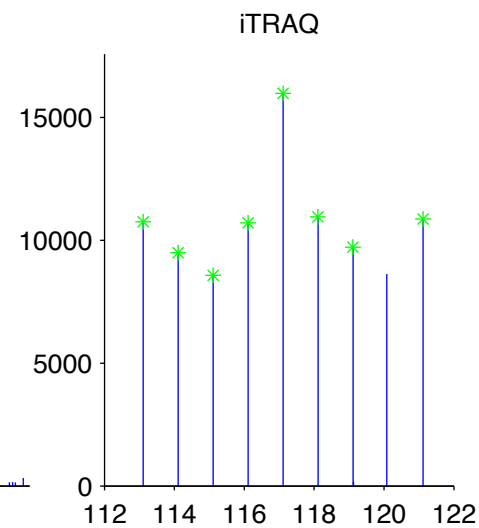

F [ V [ H [ D [ N [ y [ V [ I ] ] R

carbamoyl-phosphate synthetase 1

Charge State: +3

Scan Number: 4962

File Name: 091130ptp1blivers\_hfd\_basal2.raw

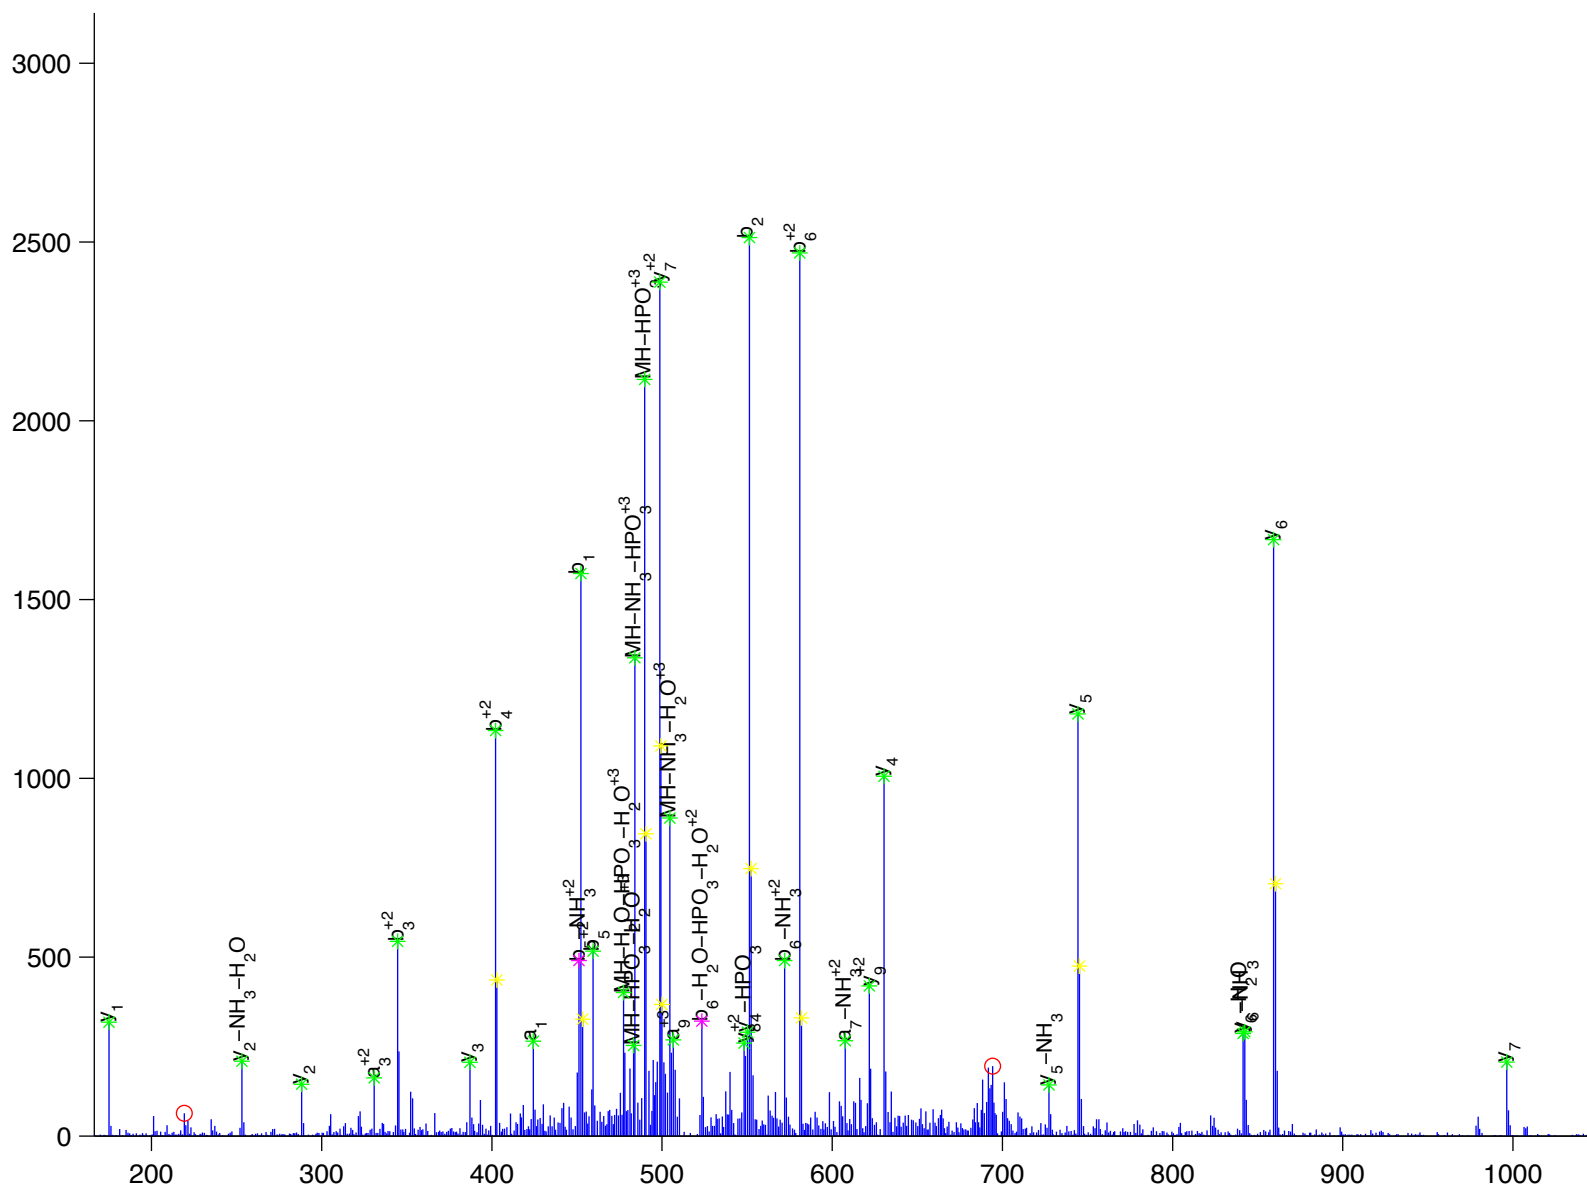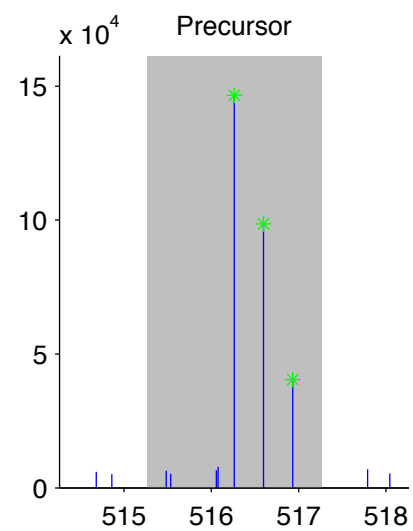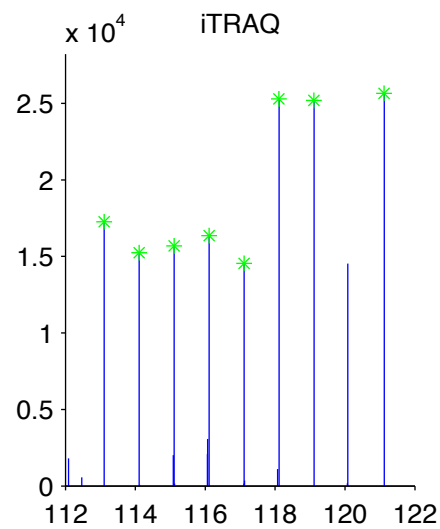

V[P]A[I]y[G]V[D]T]R

carbamoyl-phosphate synthetase 1

Charge State: +2

Scan Number: 5804

File Name: 091130ptp1blivers\_hfd\_basal2.raw

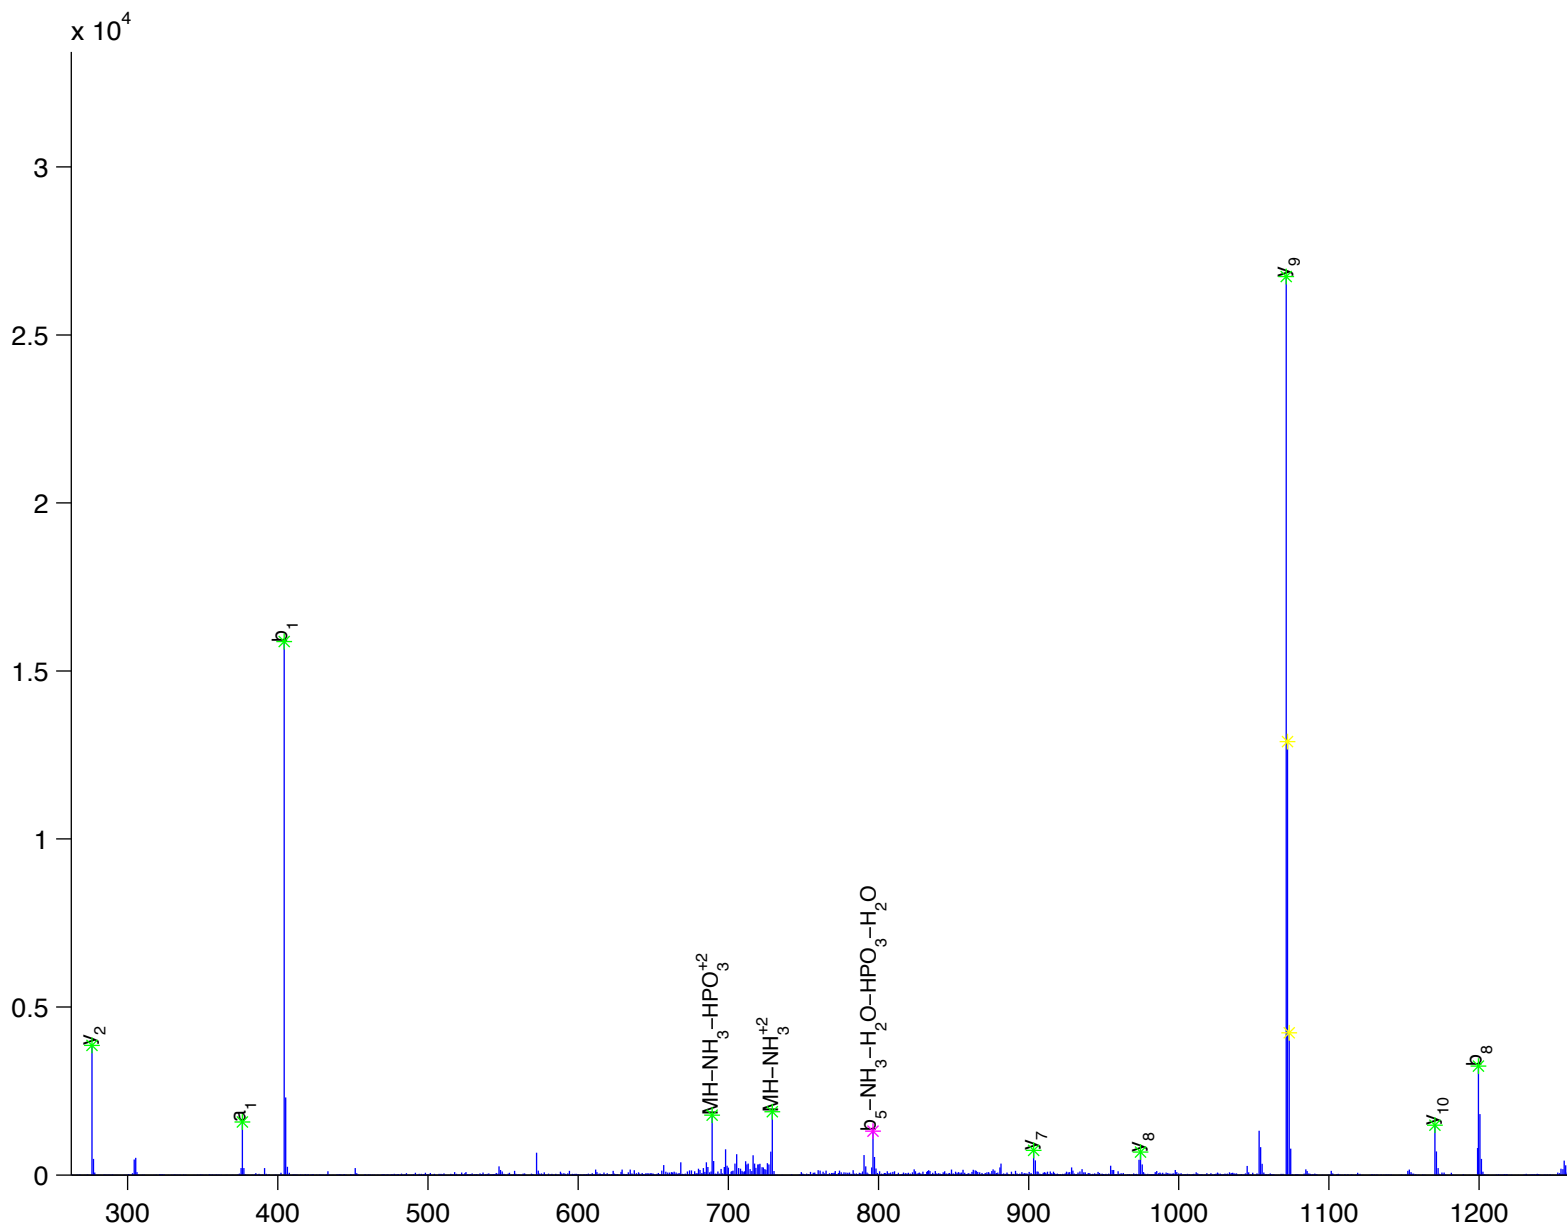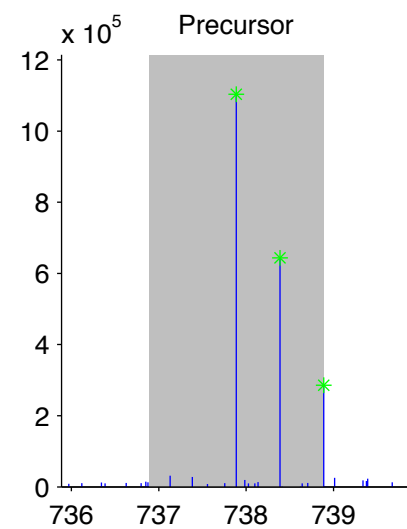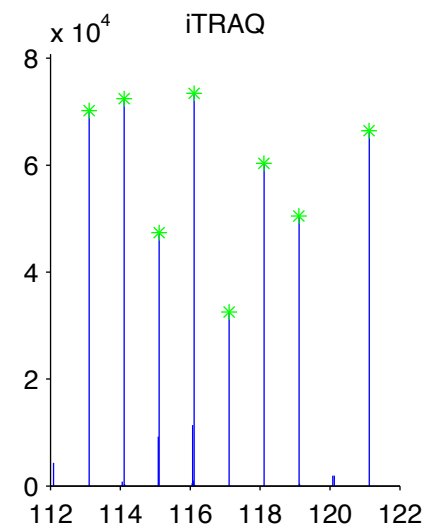

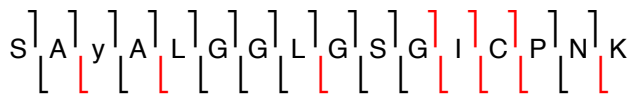

carbamoyl-phosphate synthetase 1

Charge State: +3

Scan Number: 6308

File Name: 090806ptp1blivers\_M\_NC2.raw

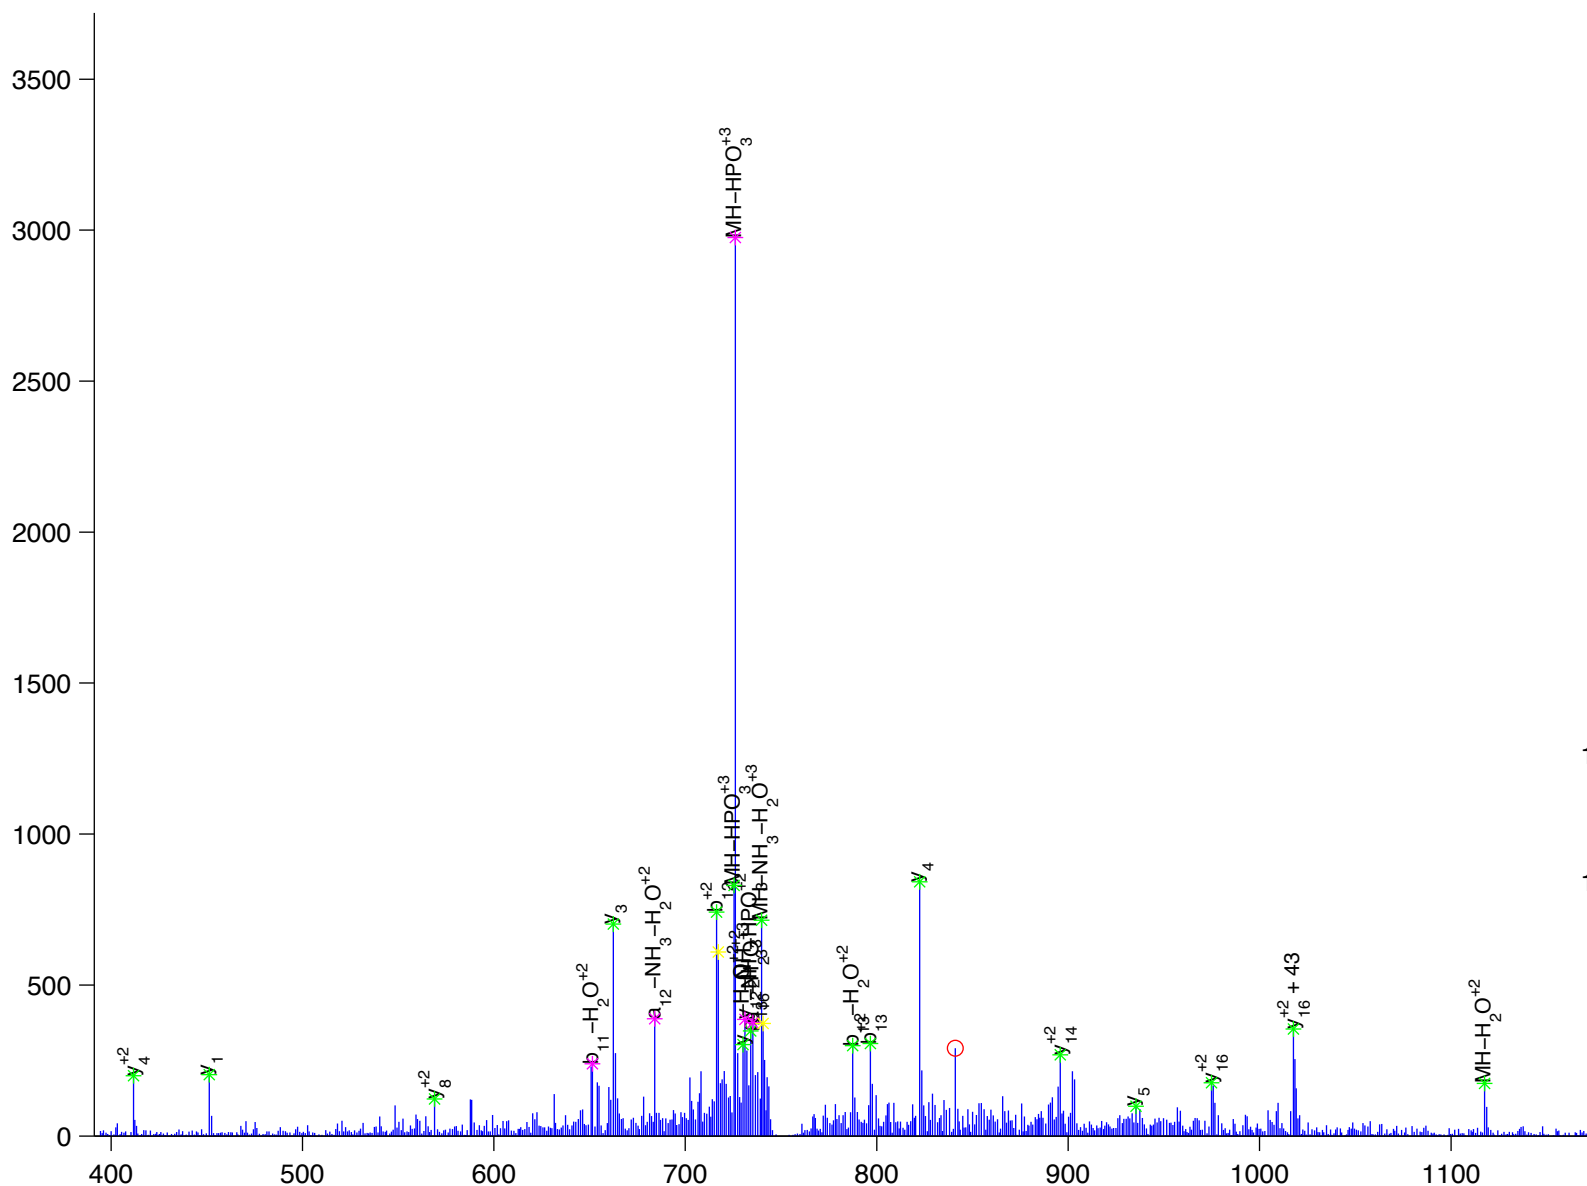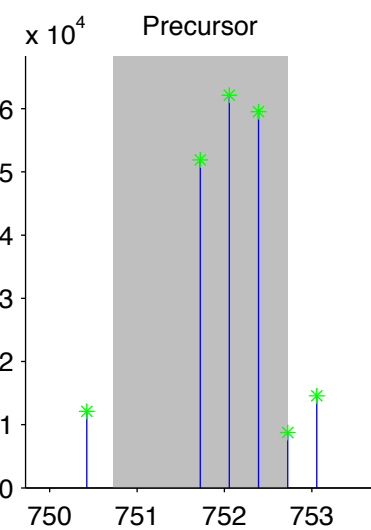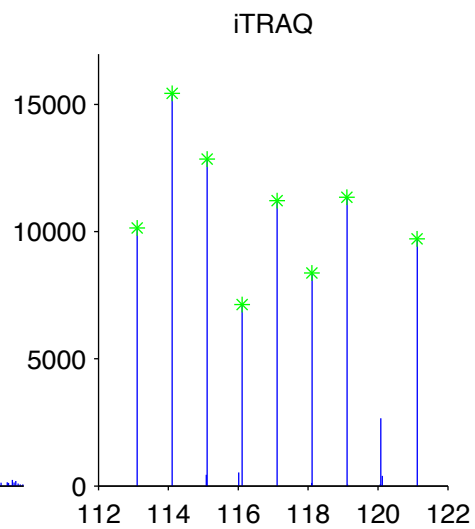

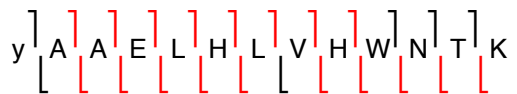

carbonic anhydrase 2

Charge State: +4

Scan Number: 5844

File Name: 091130ptp1blivers\_hfd\_basal2.raw

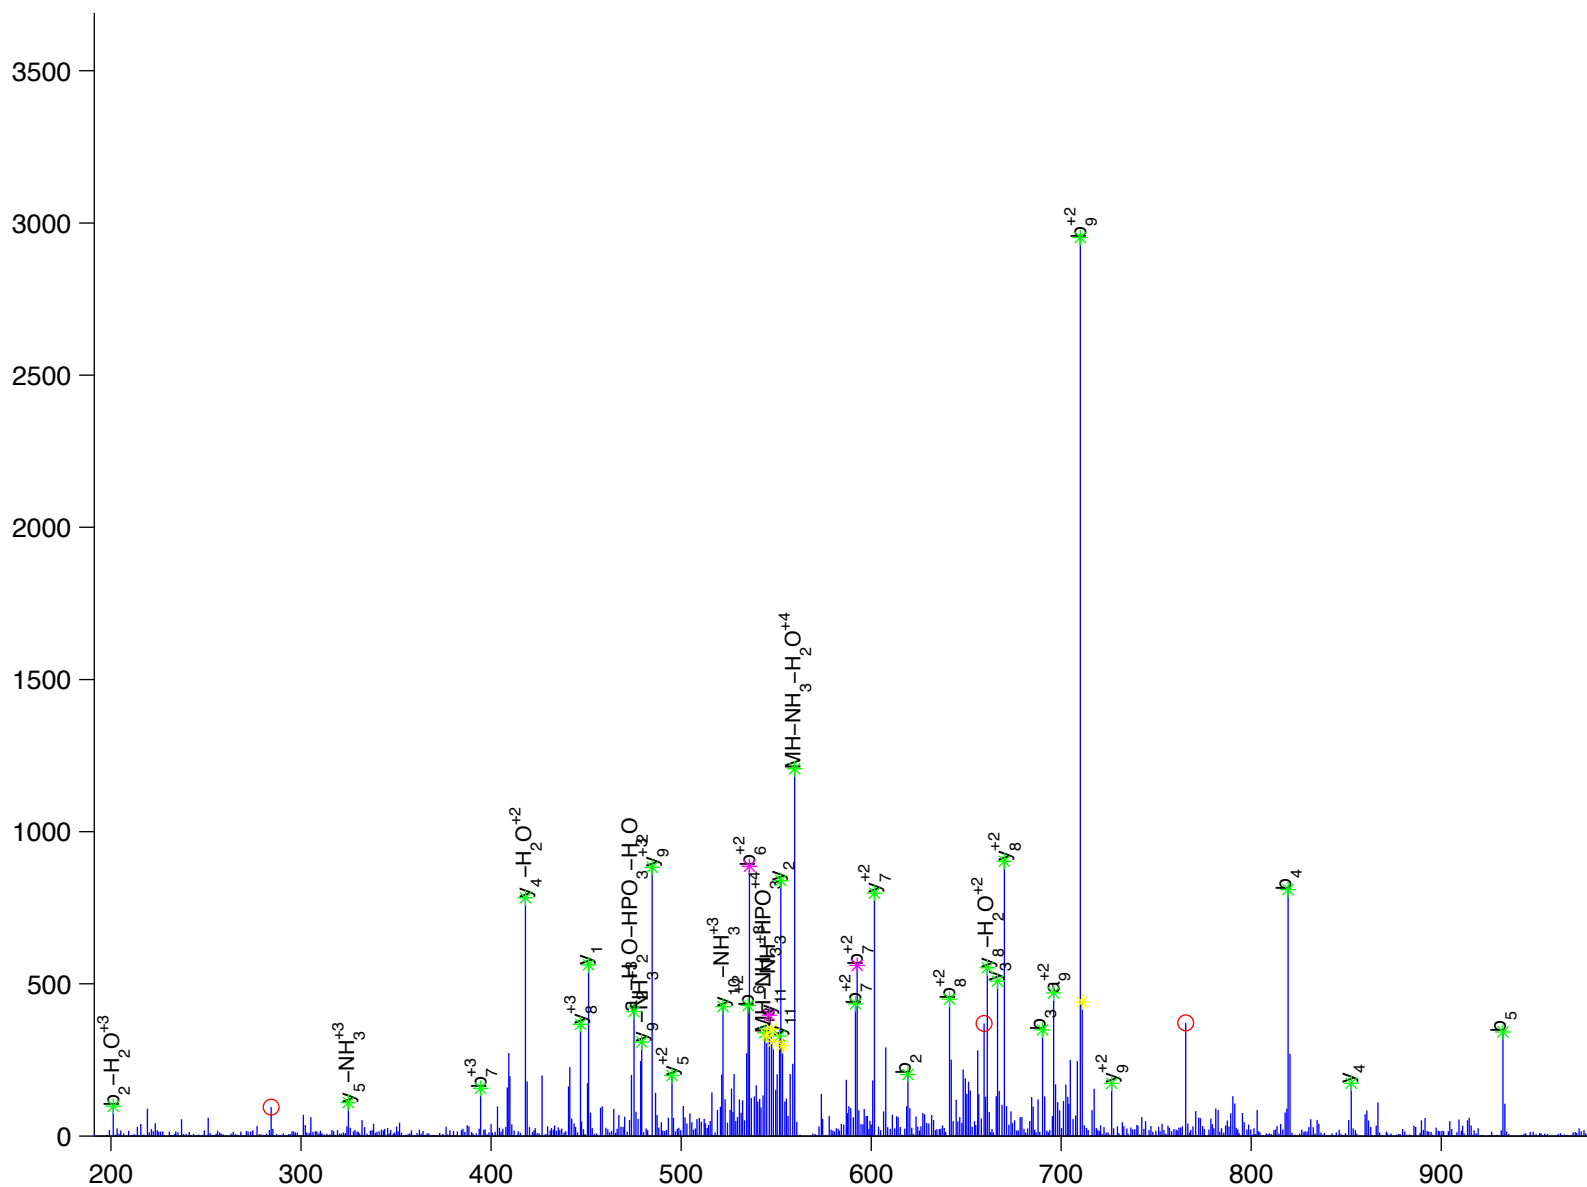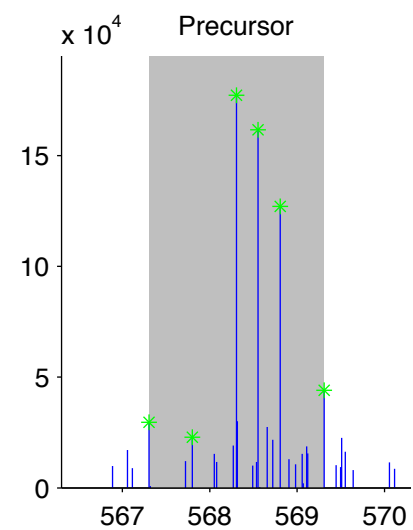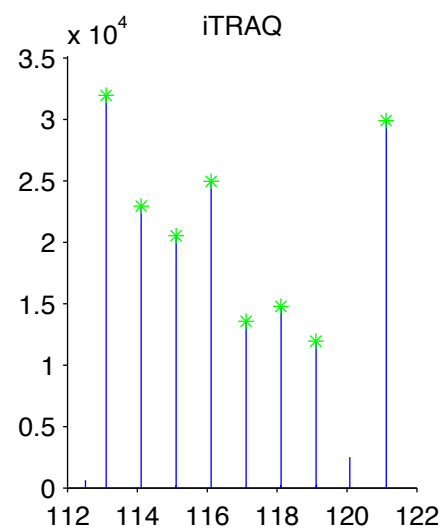

V V F D D T y D R

carbonic anhydrase 3

Charge State: +2

Scan Number: 5693

File Name: 091130ptp1blivers\_hfd\_basal2.raw

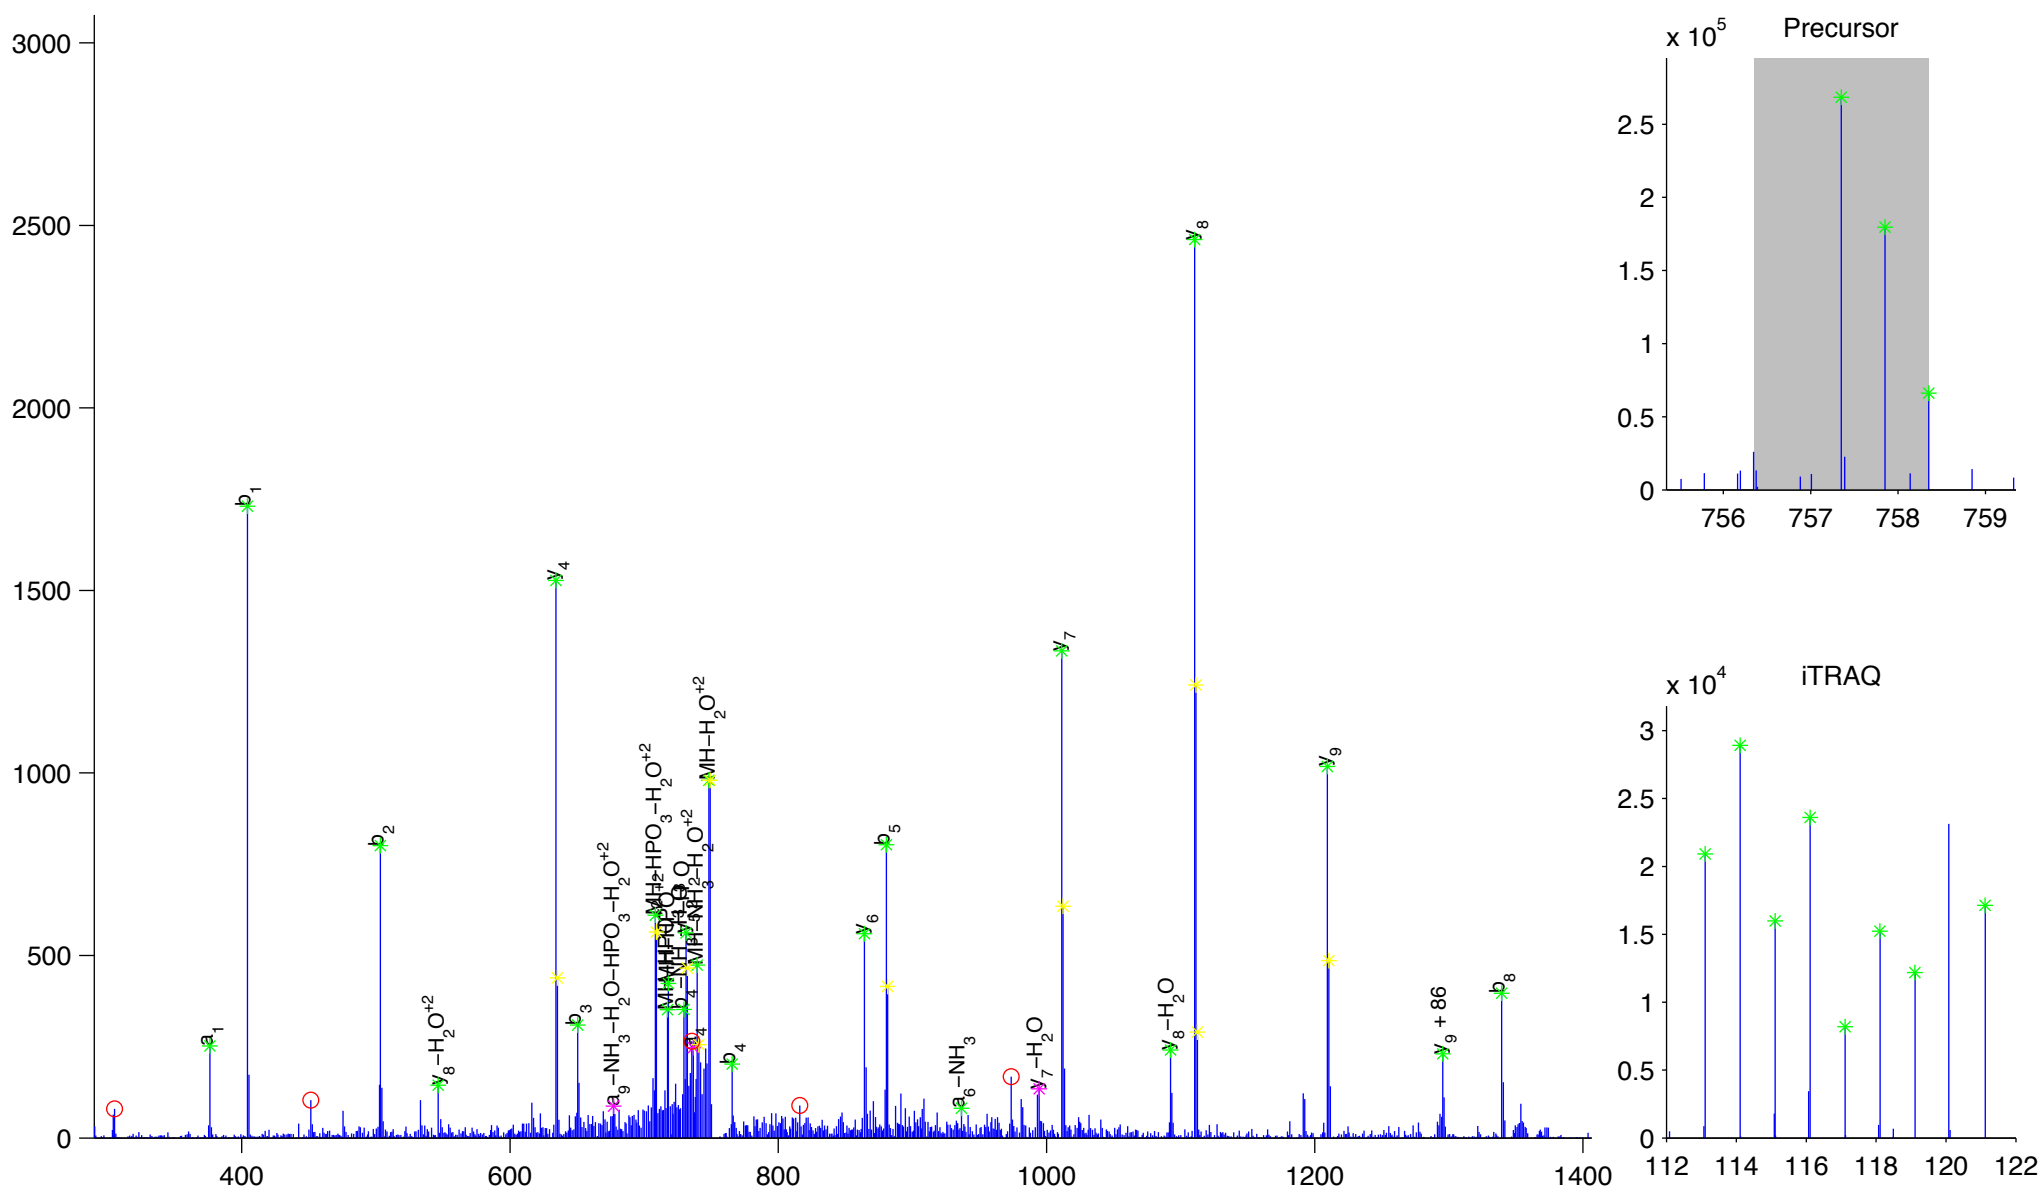



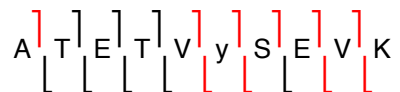

carcinoembryonic antigen-related cell adhesion molecule 1 isoform 1

Charge State: +3

Scan Number: 3997

File Name: 090806ptp1blivers\_M\_NC2.raw

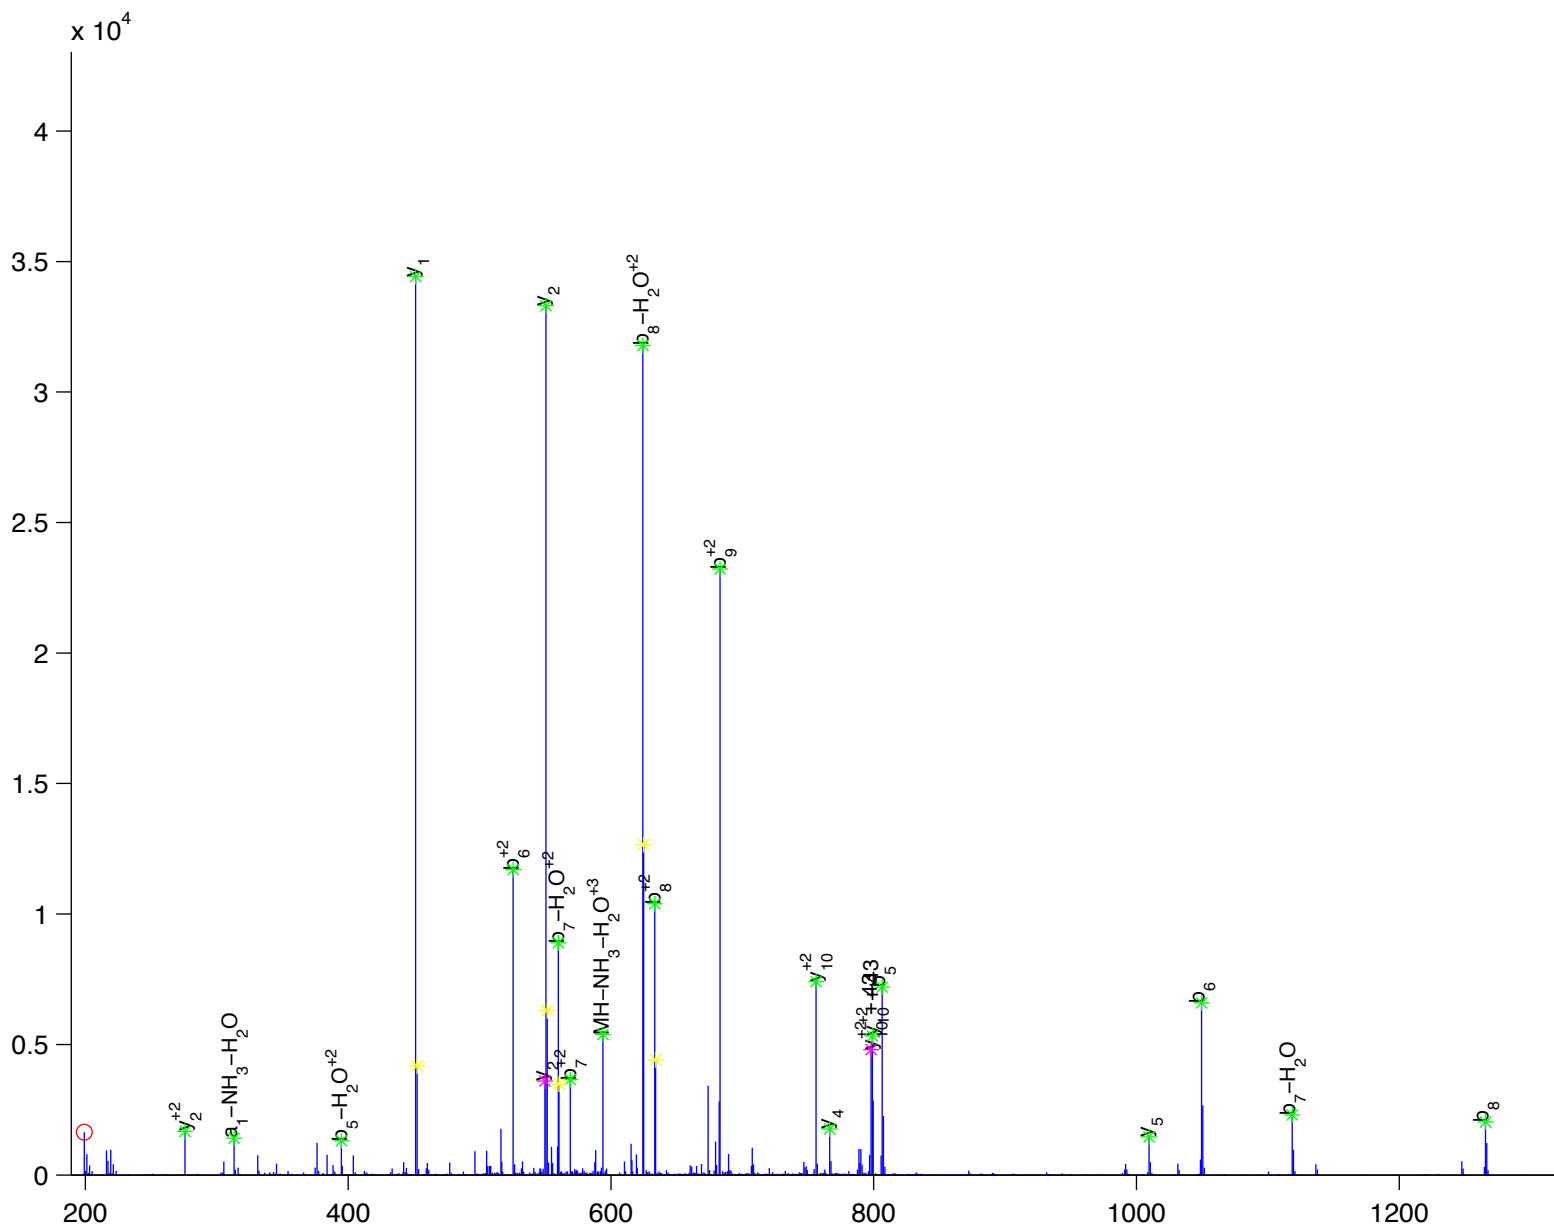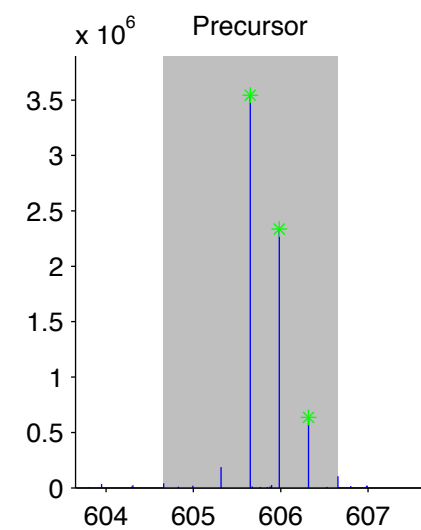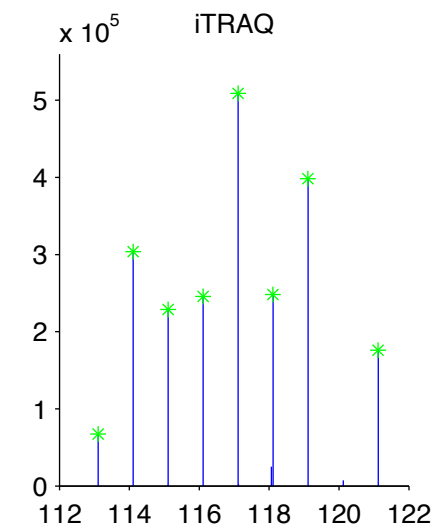

N [ T ] y [ N ] Q [ T ] A [ L ] D [ I ] V [ N ] Q [ F ] T [ T ] S [ Q ] A [ S ] R

casein-interacting protein 2

Charge State: +3

Scan Number: 11759

File Name: 090807ptp1blivers\_M\_HFD\_basal.raw

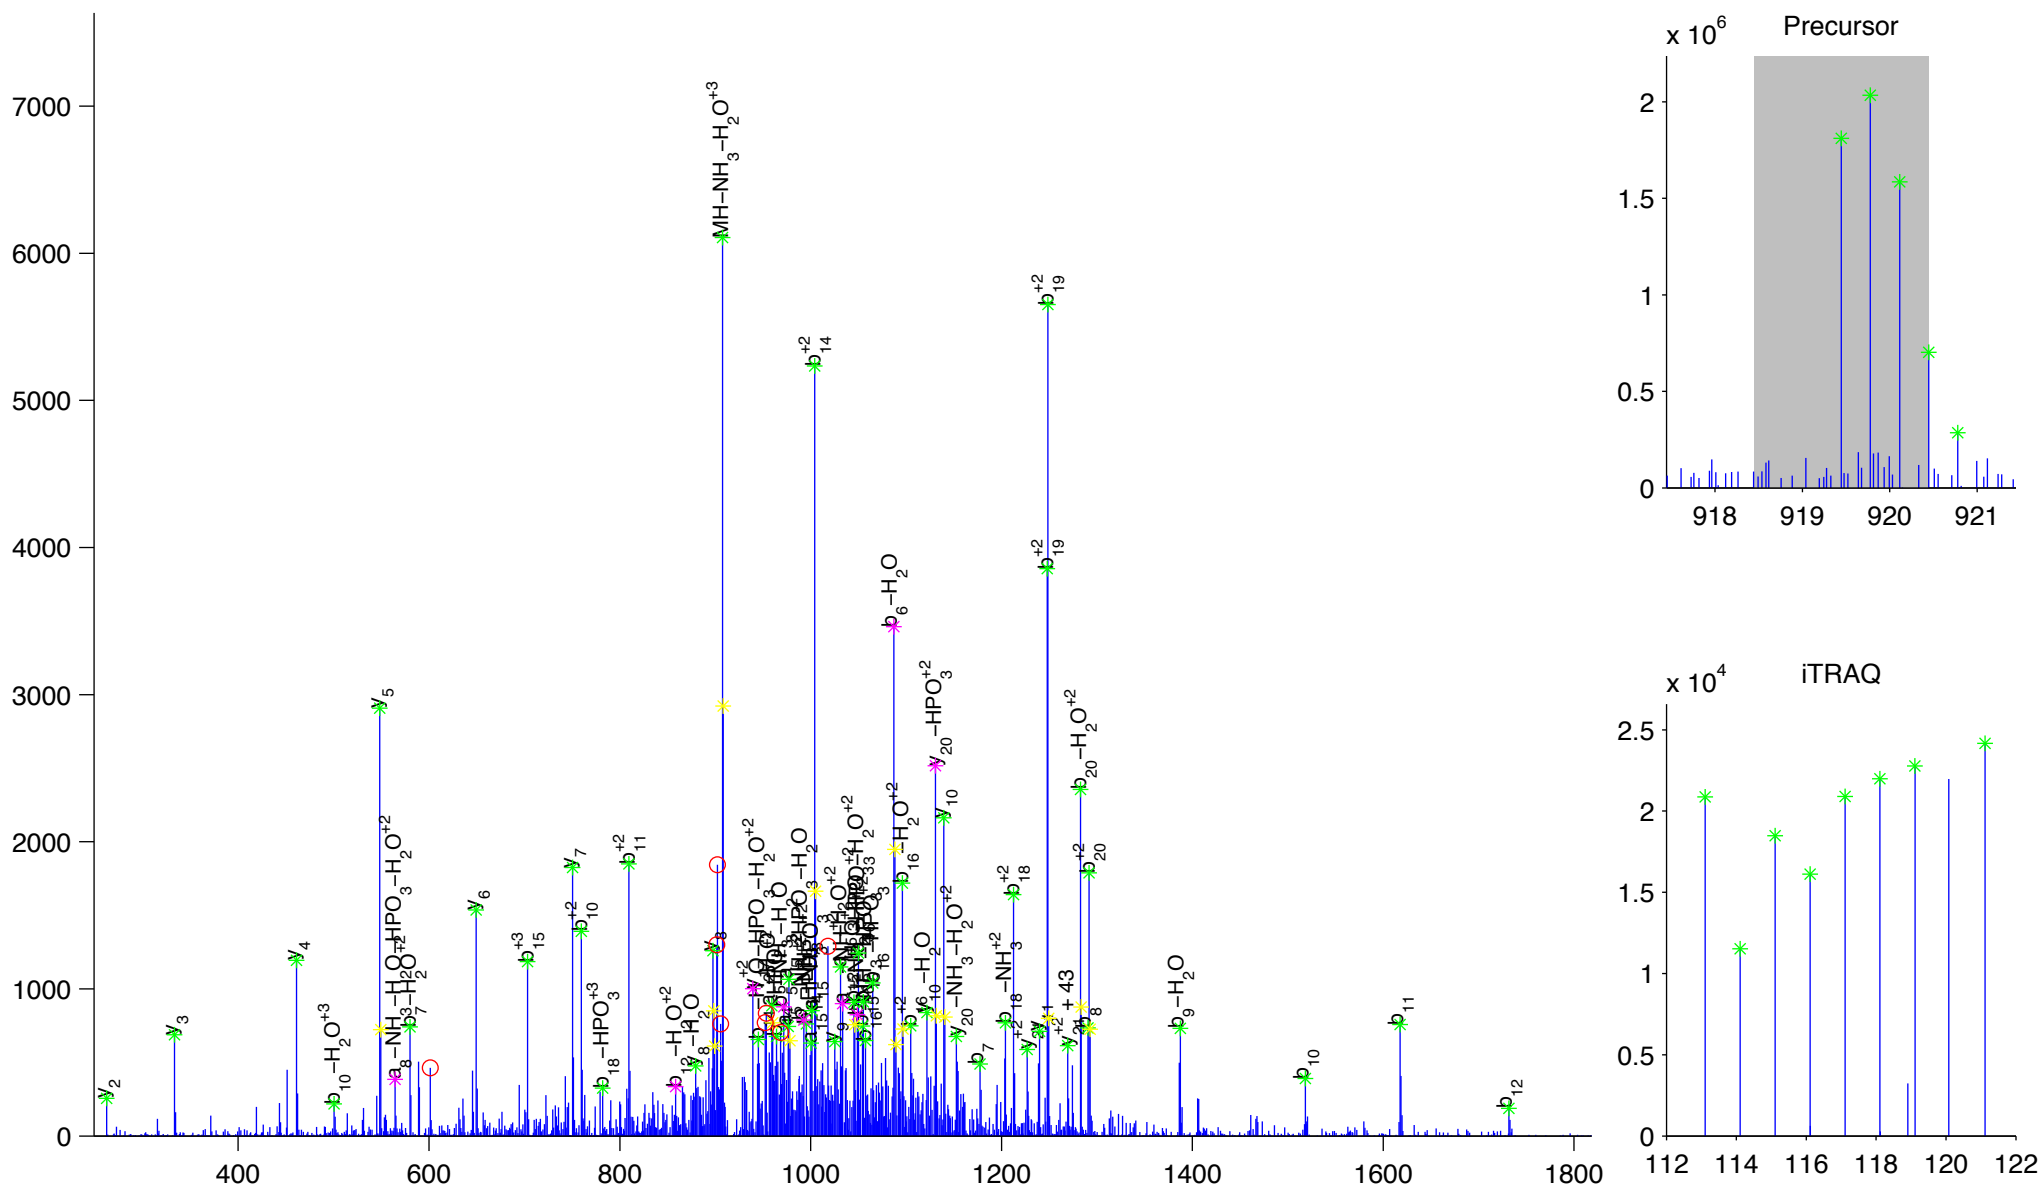

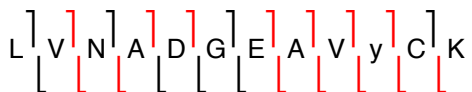

catalase

Charge State: +3

Scan Number: 4468

File Name: 090806ptp1blivers\_M\_NC2.raw

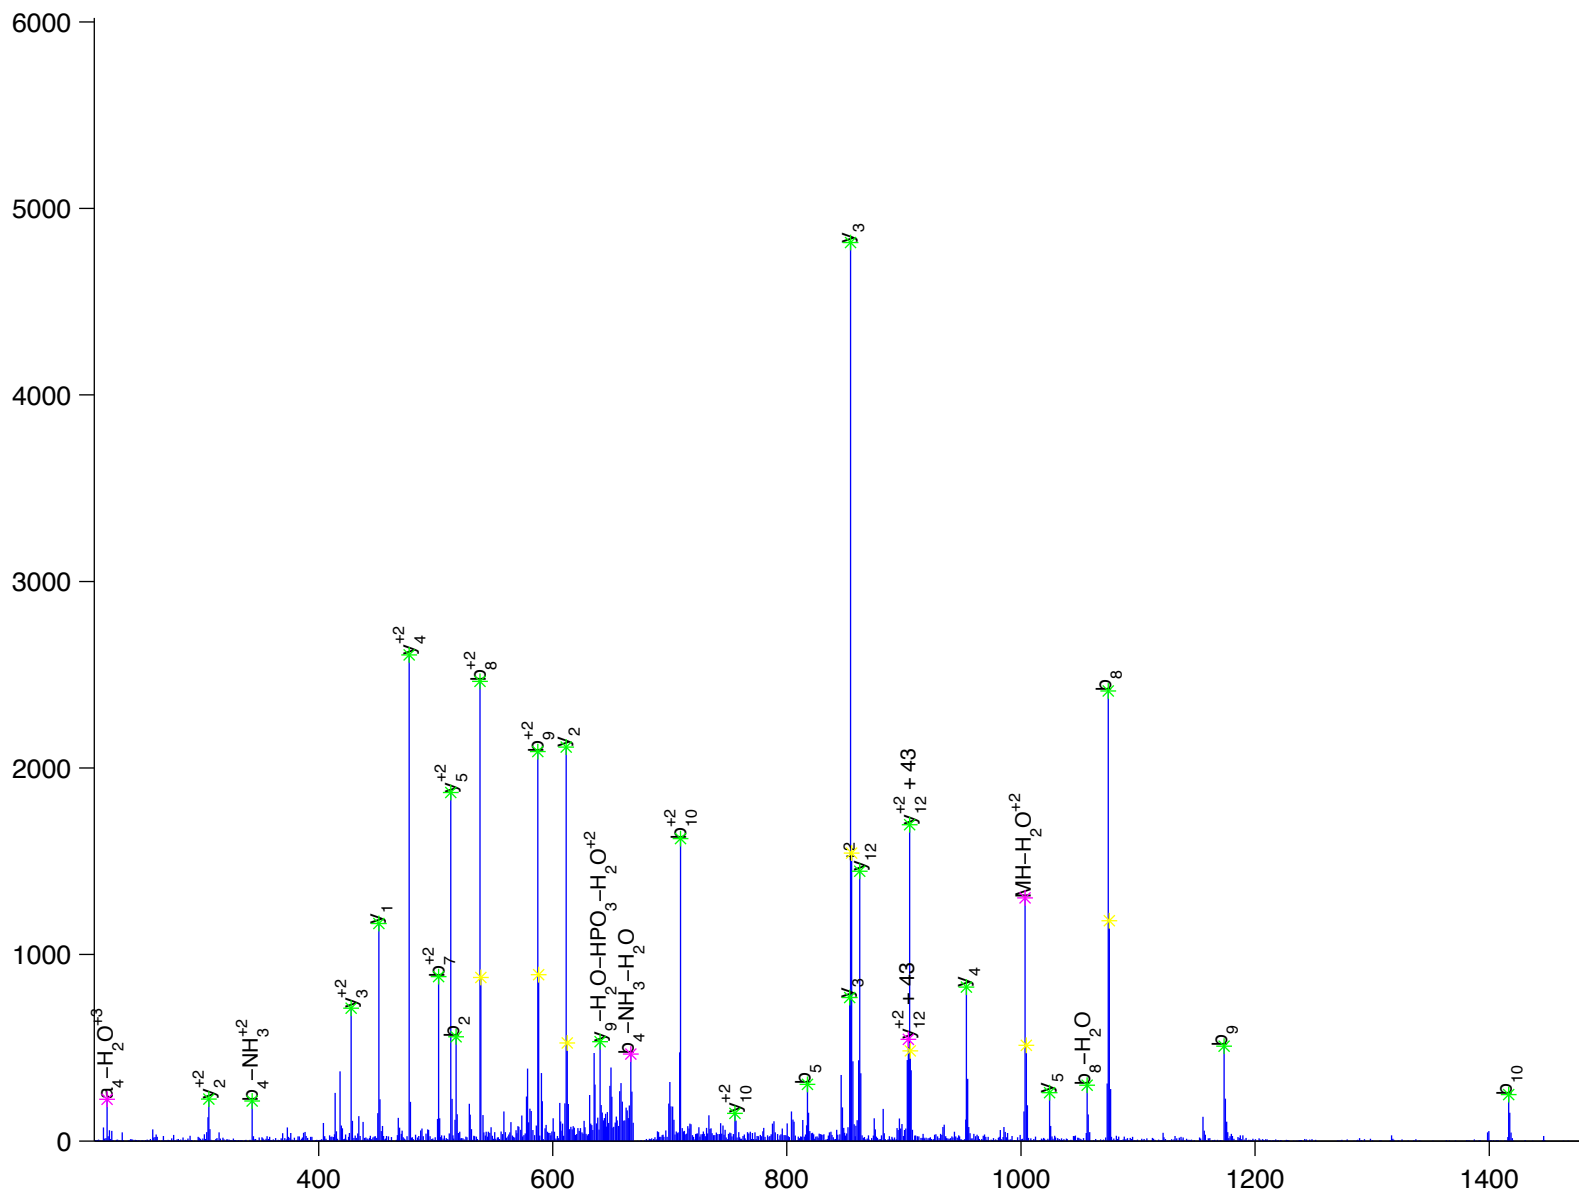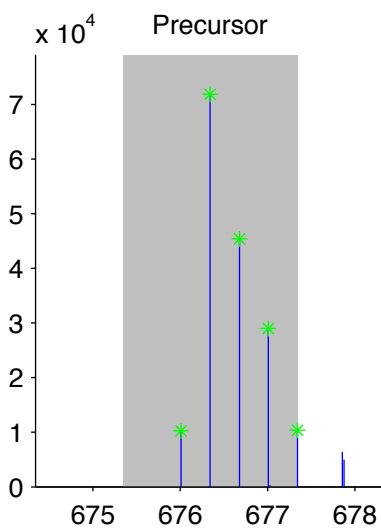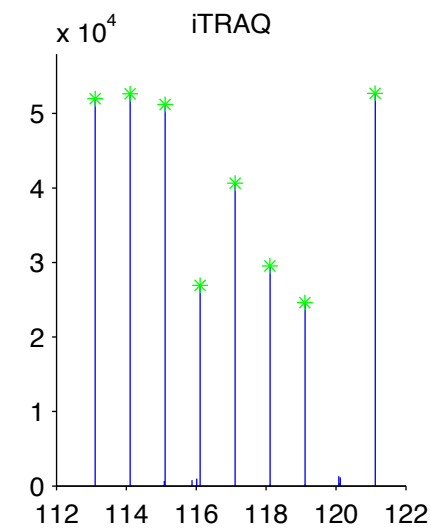

G[A]G[A]F[G]y[F]E[V]T[H]D[I]T[R]

catalse

Charge State: +3

Scan Number: 5893

File Name: 100908ptp1blivers\_ncHFD3\_basal.raw

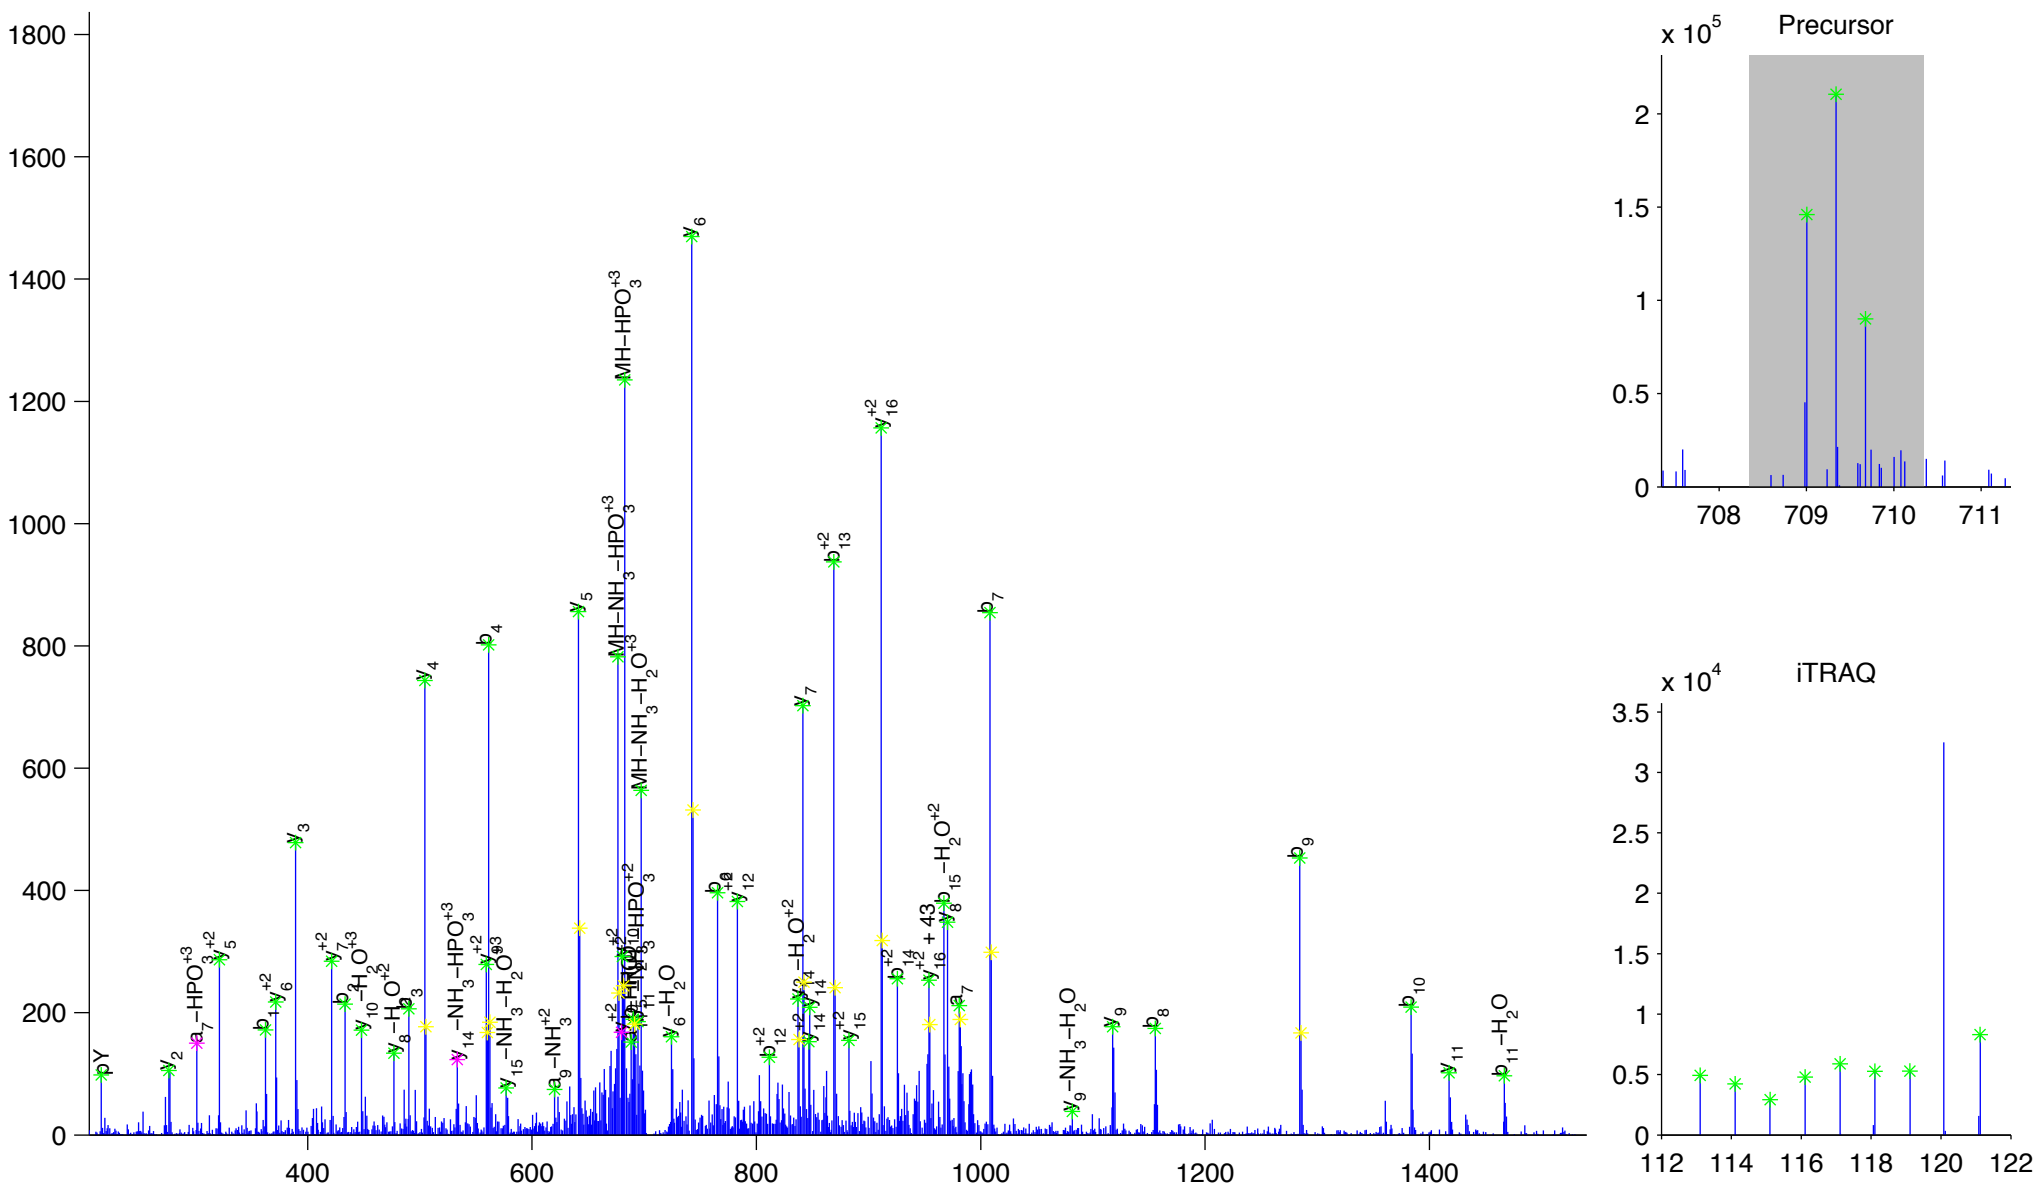

N [ A ] G [ N ] E [ Q ] D [ L ] G [ I ] Q [ y ] K

catenin alpha 1

Charge State: +3

Scan Number: 4762

File Name: 091130ptp1blivers\_hfd\_basal2.raw

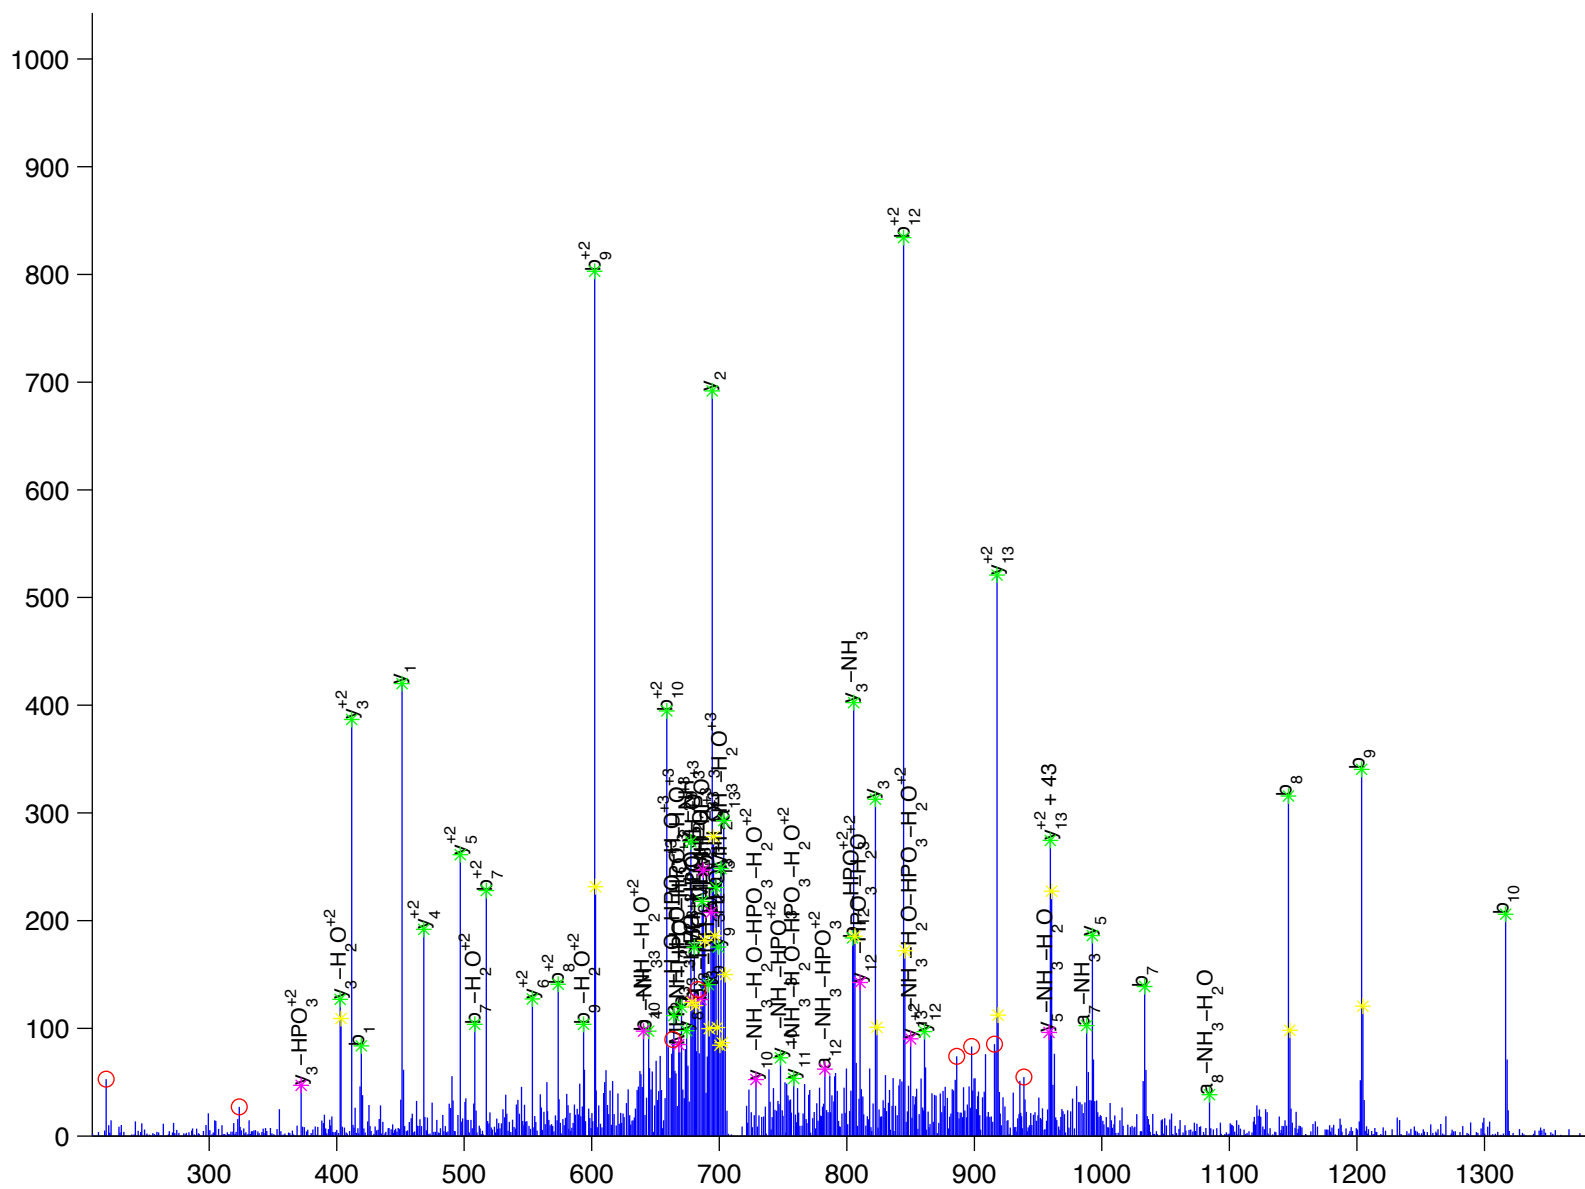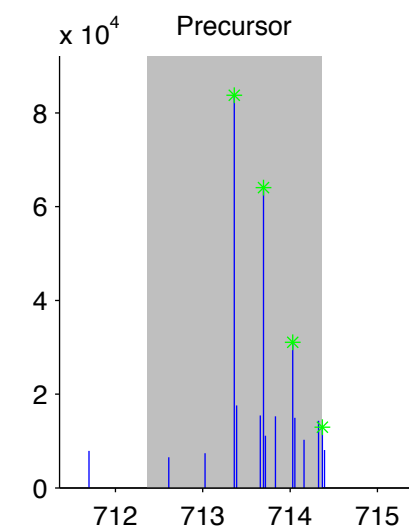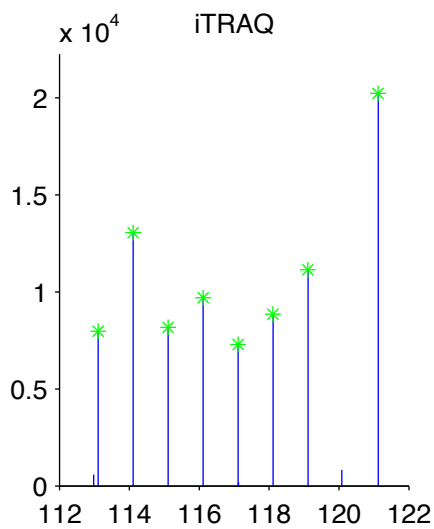

L [ V ] y [ D ] G [ I ] R

catenin alpha 1

Charge State: +

Scan Number: 5676

File Name: 091130ptp1blivers\_hfd\_basal2.raw

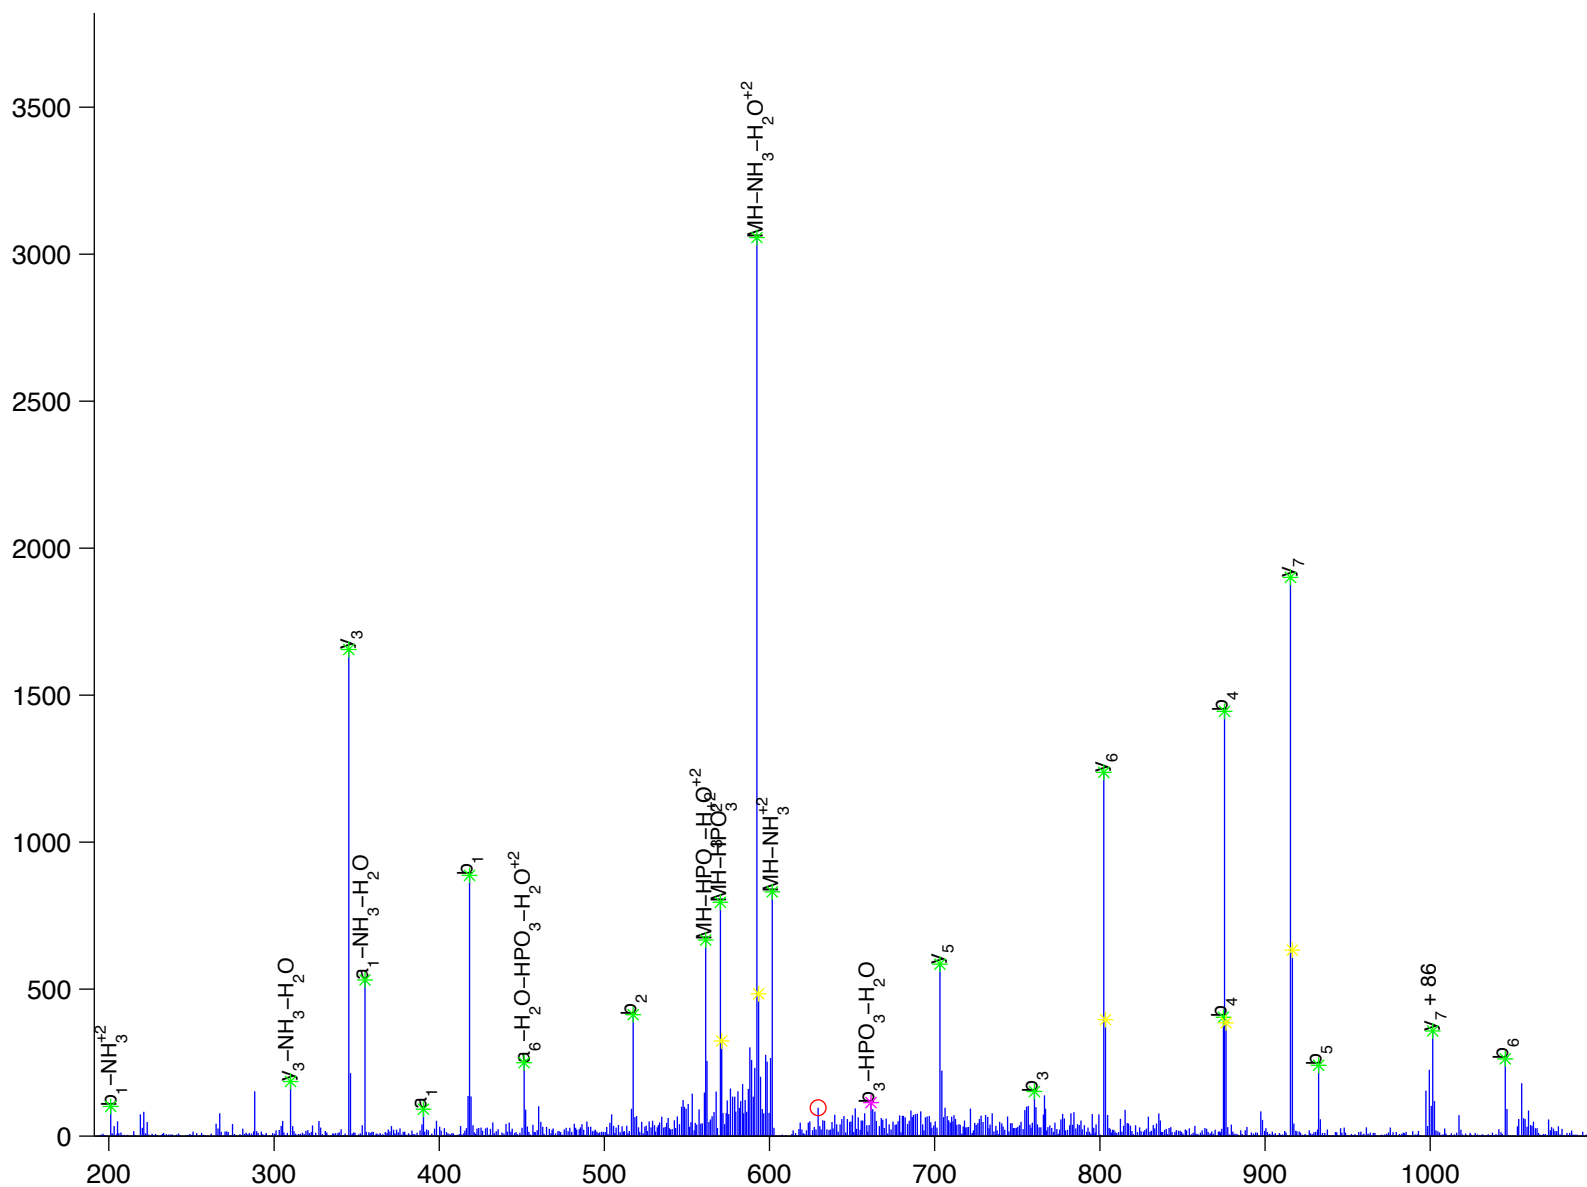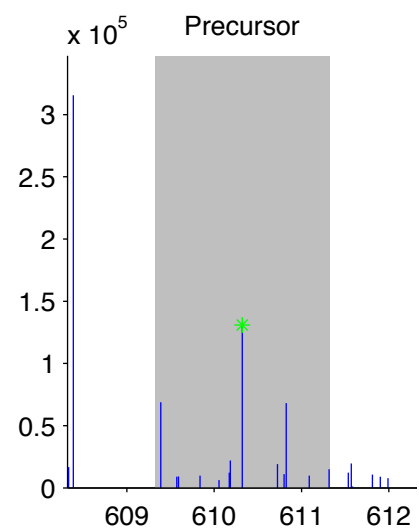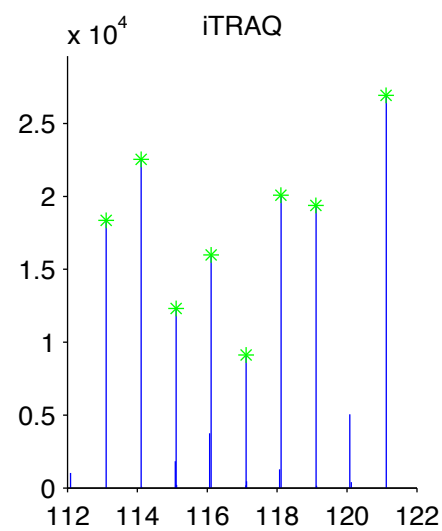

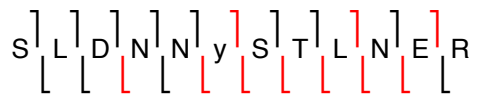

catenin, delta 1 isoform 1

Charge State: +3

Scan Number: 3308

File Name: 100908ptp1blivers\_ncHFD3\_basal.raw

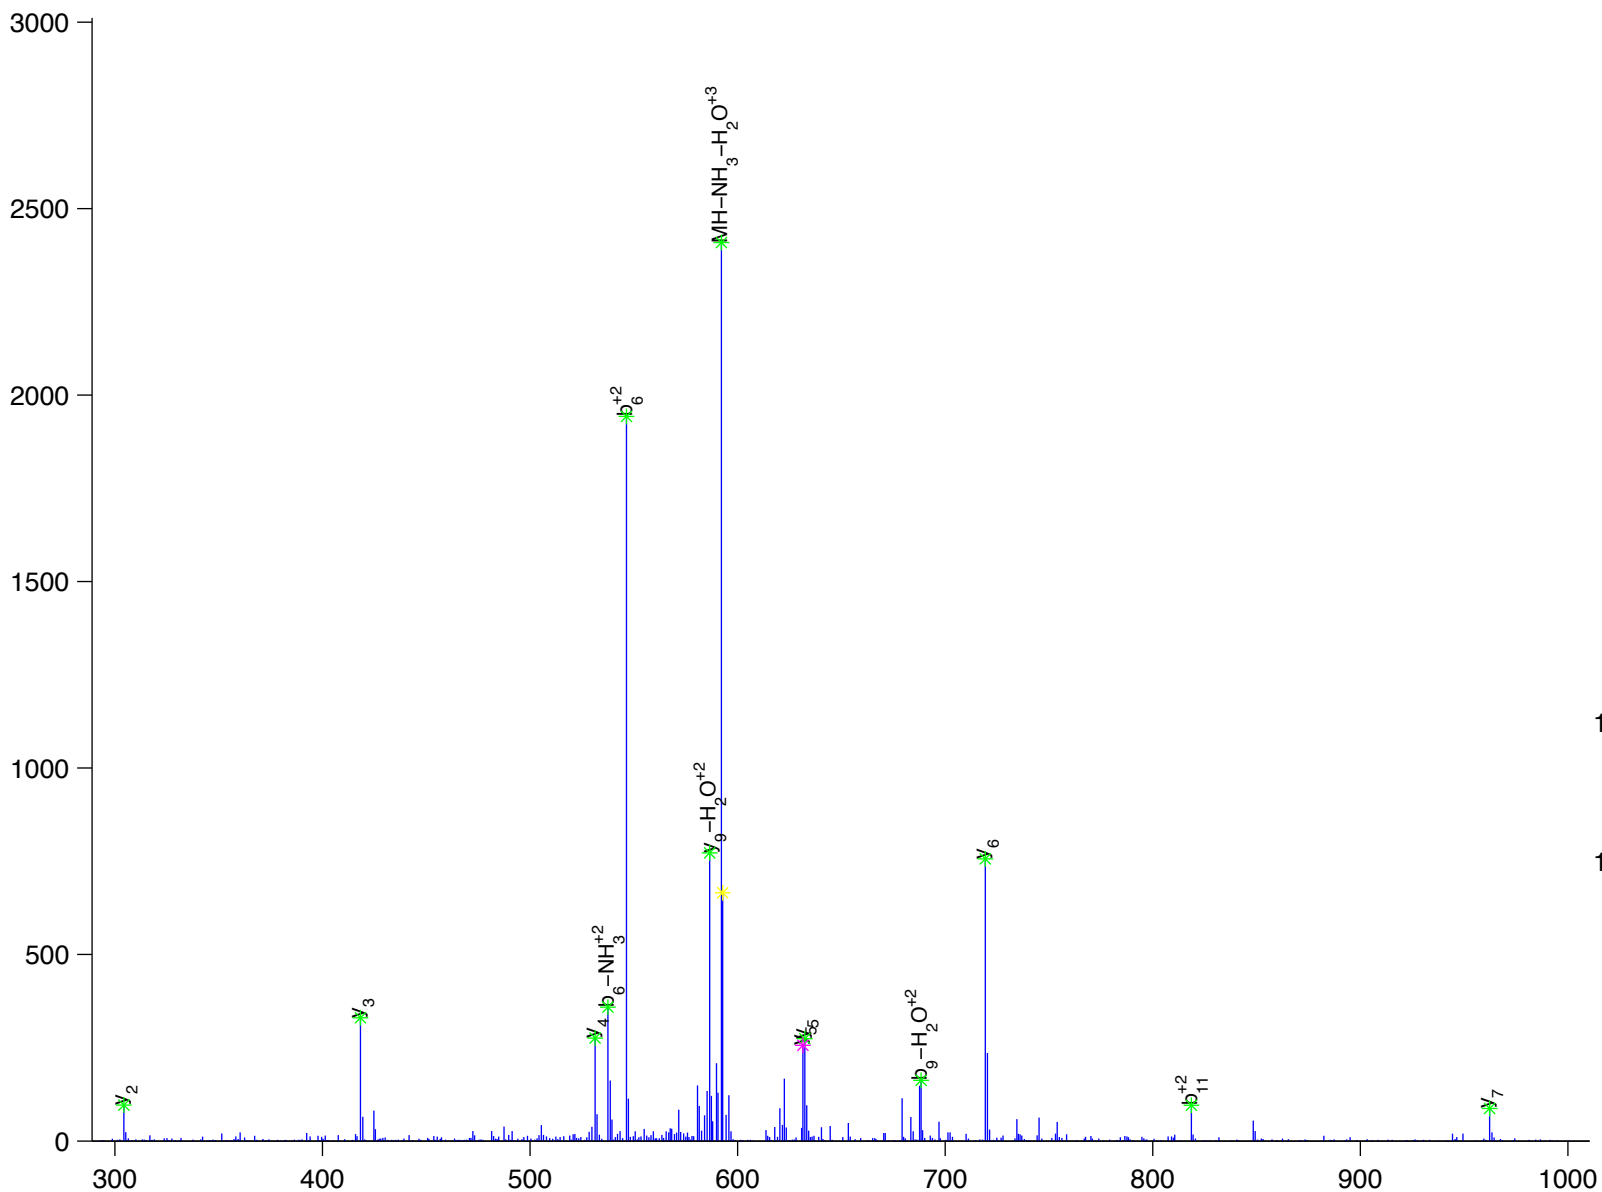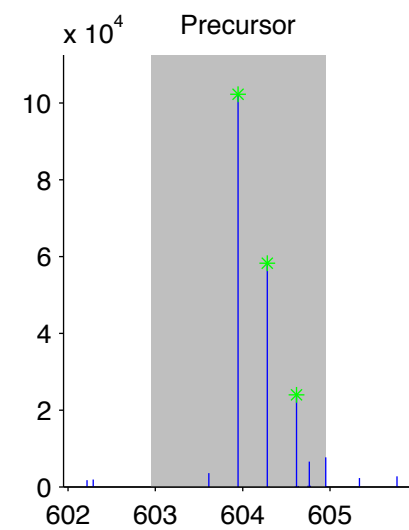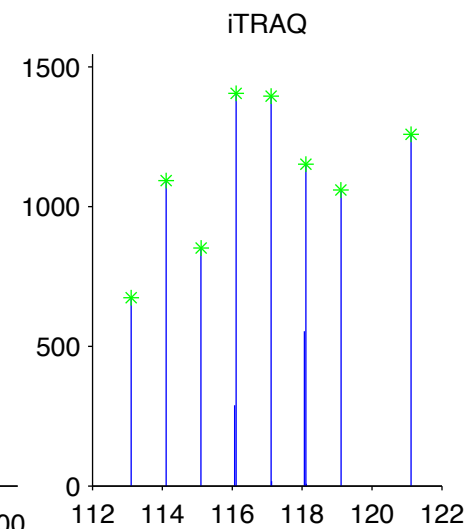

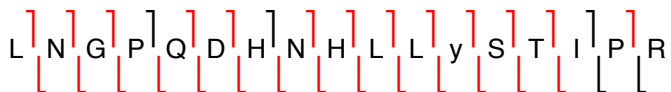

catenin, delta 1 isoform 1

Charge State: +4

Scan Number: 5172

File Name: 091130ptp1blivers\_hfd\_basal2.raw

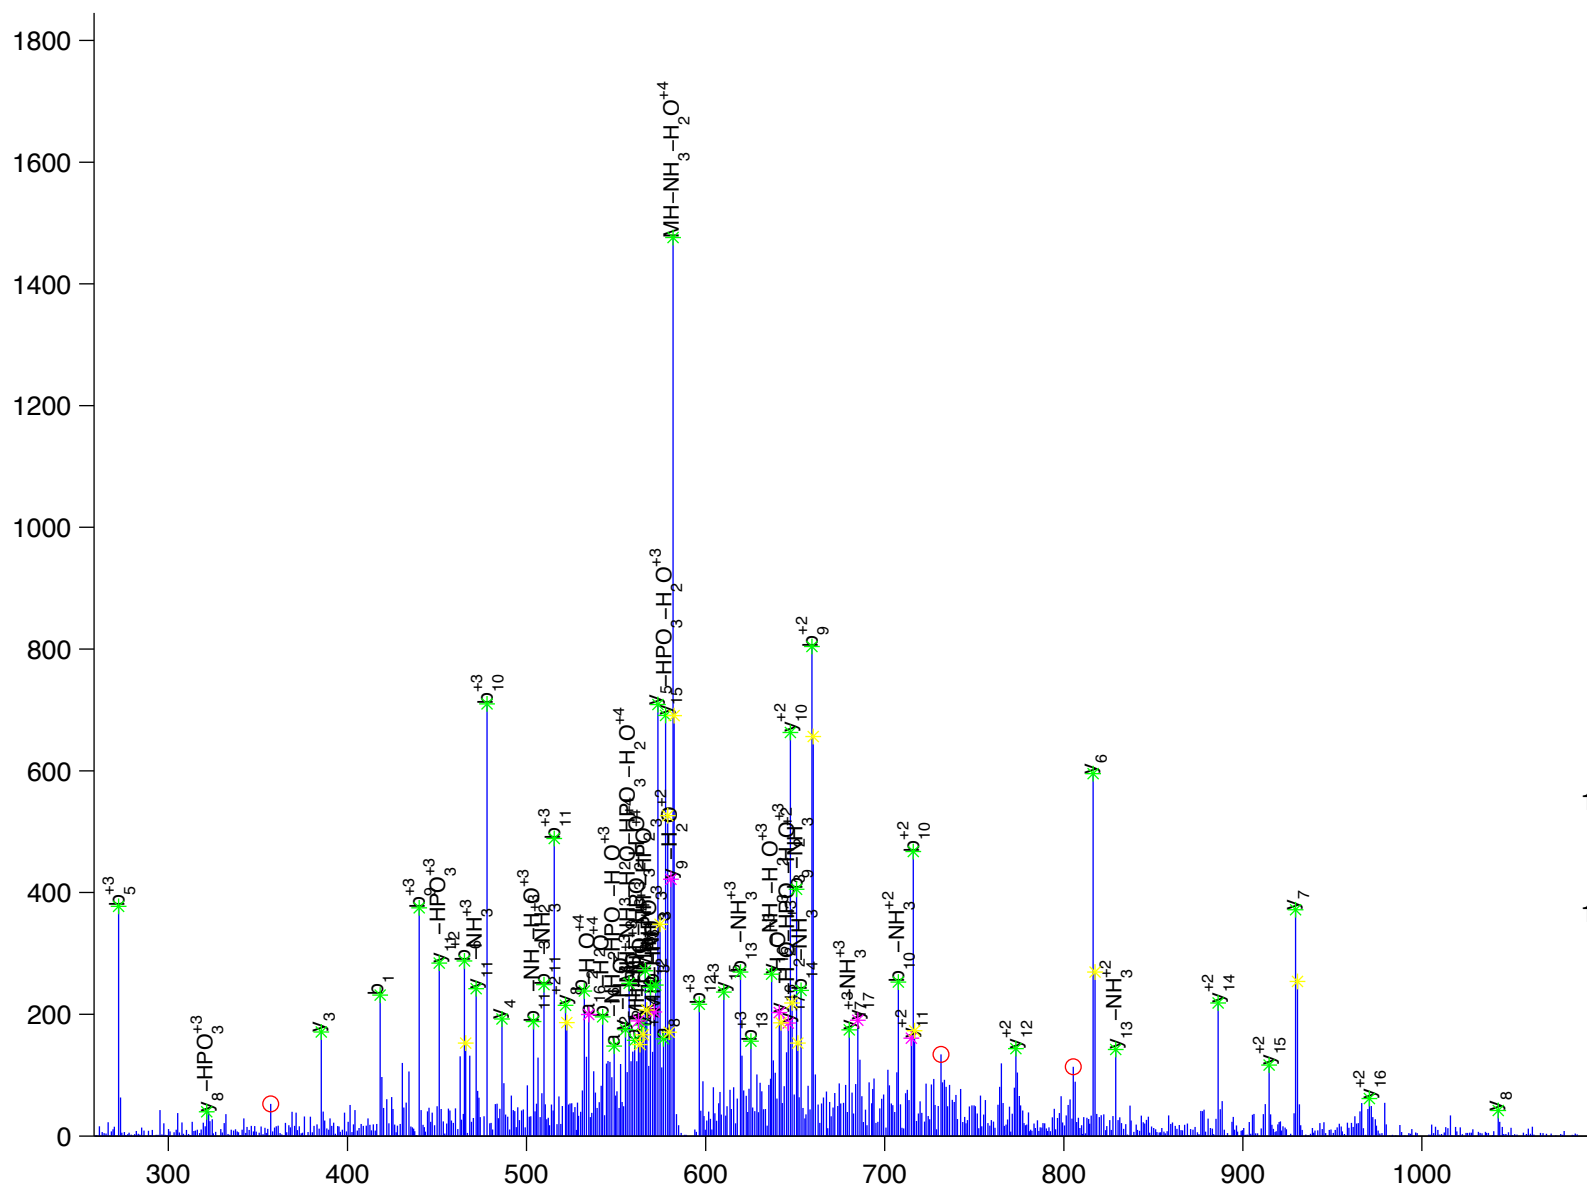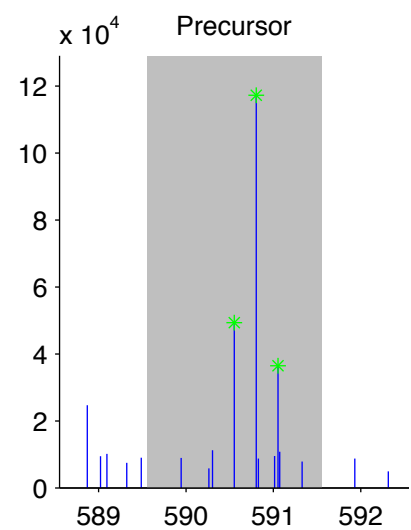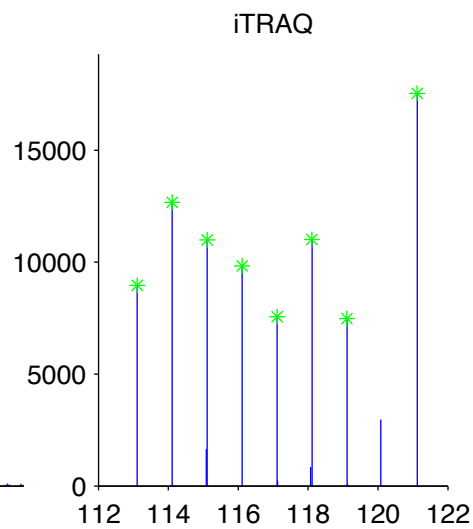



y [ V ] [ D ] [ S ] [ E ] [ G ] [ H ] [ L ] y [ T ] [ V ] [ P ] [ I ] [ R ]

caveolin, caveolae protein 1  
 Charge State: +3  
 Scan Number: 5596  
 File Name: 091130ptp1blivers\_hfd\_basal2.raw

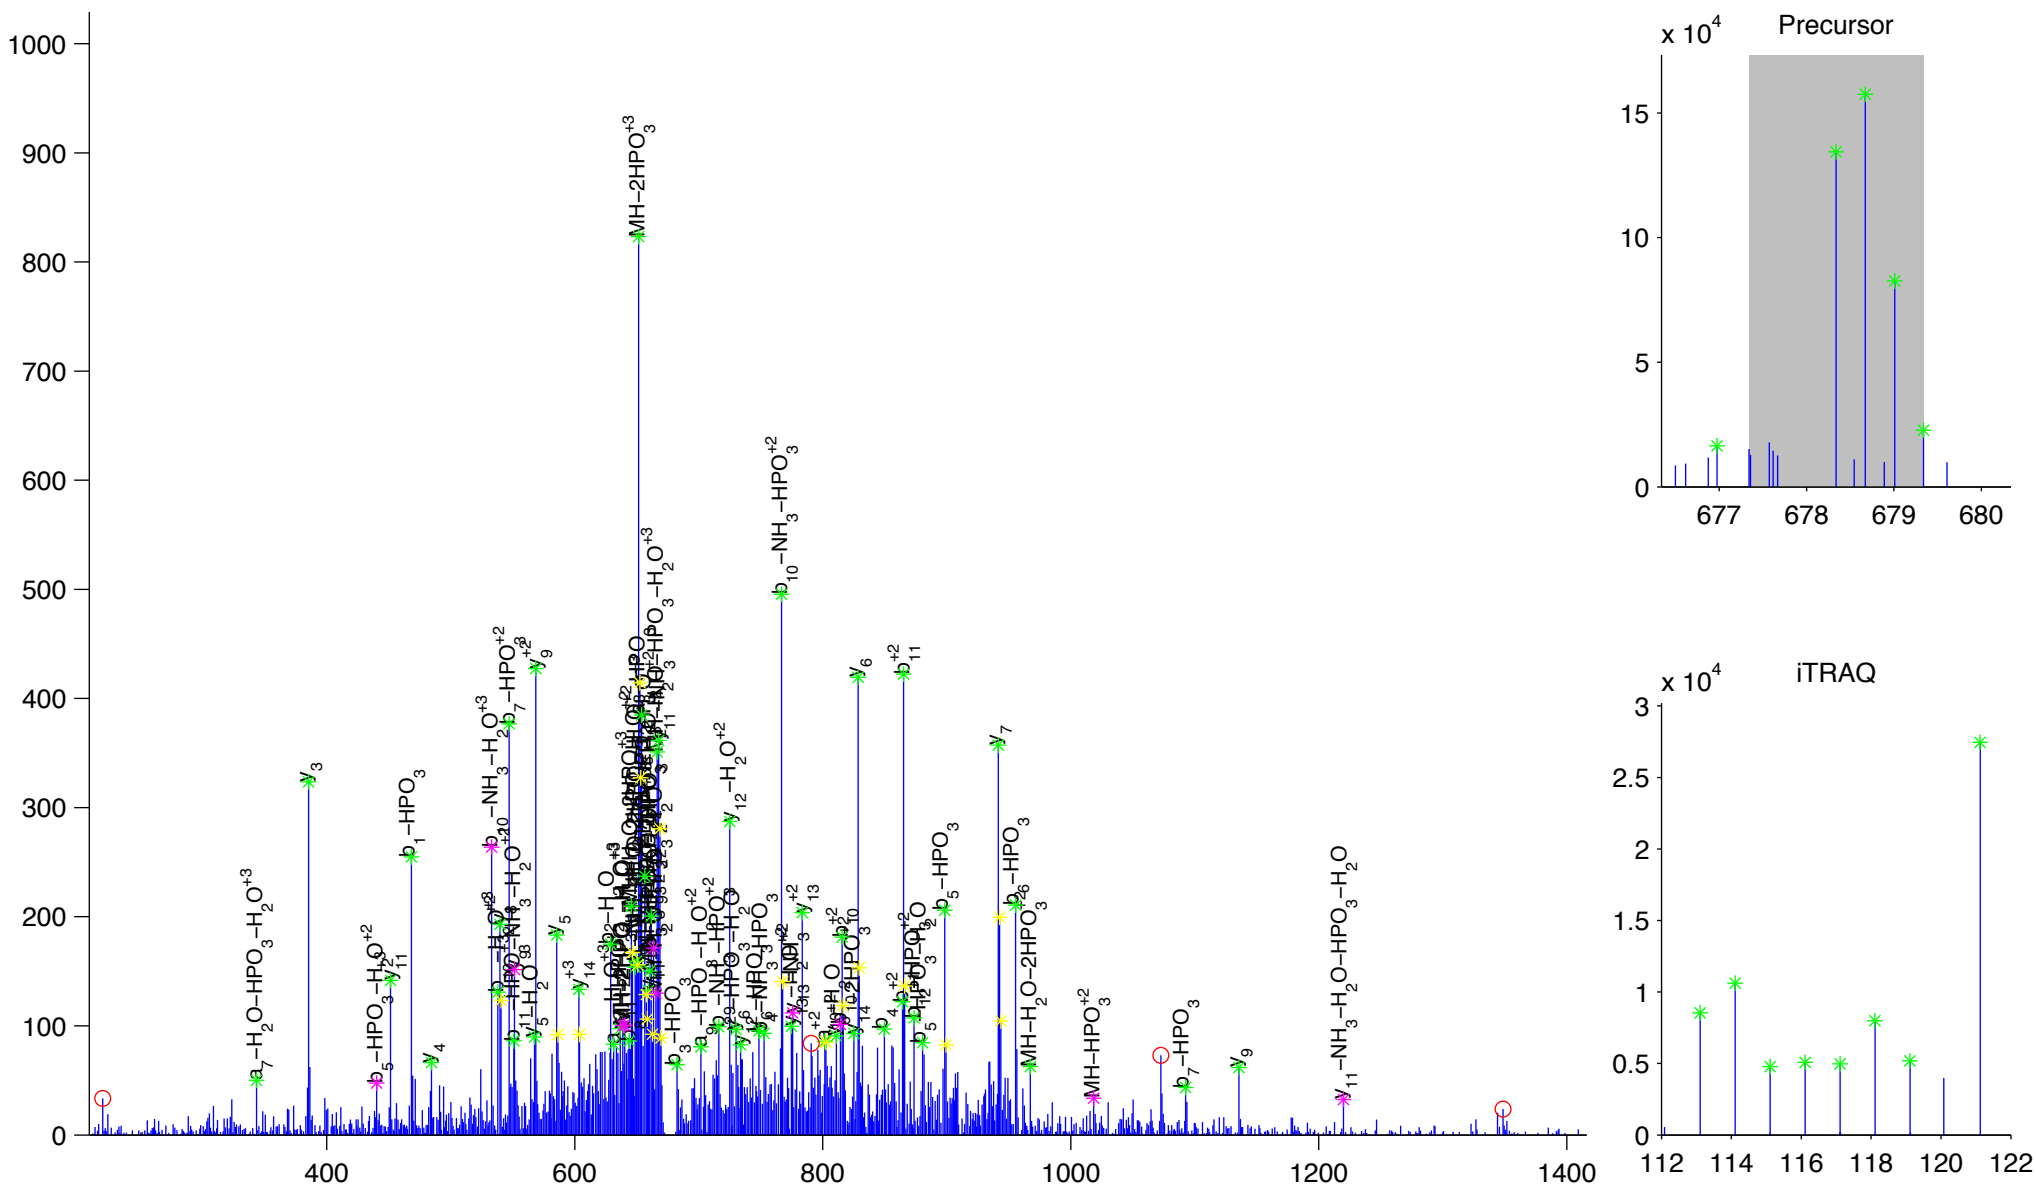

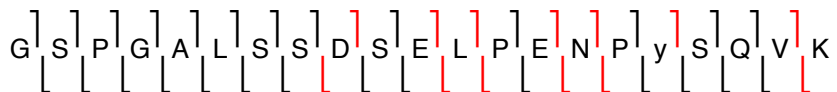

cingulin

Charge State: +3

Scan Number: 5273

File Name: 091130ptp1blivers\_hfd\_basal2.raw

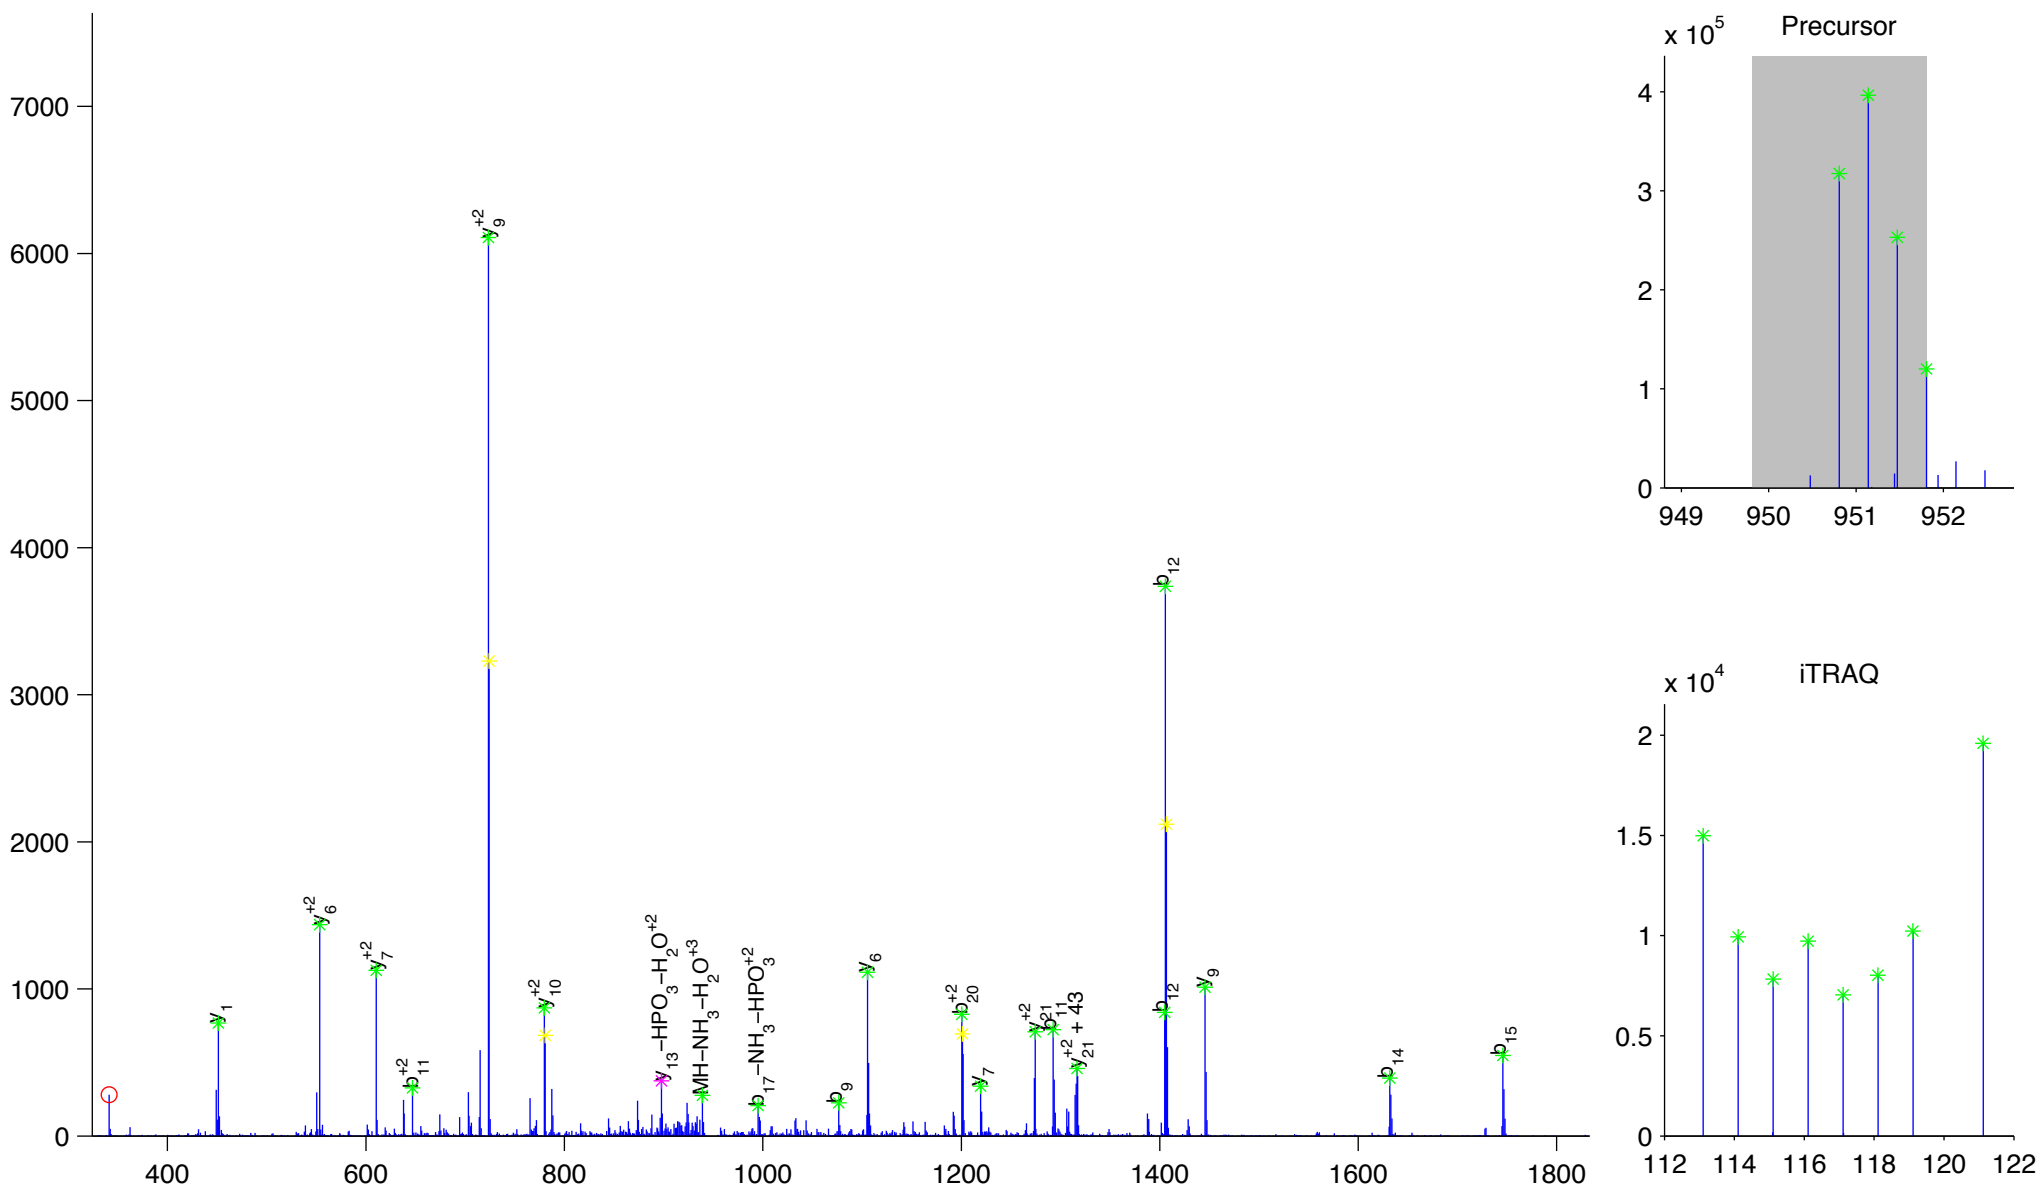

E N P y Y D S R

clathrin, heavy polypeptide (Hc)

Charge State: +2

Scan Number: 3291

File Name: 0090807ptp1blivers\_M\_HFD2.raw

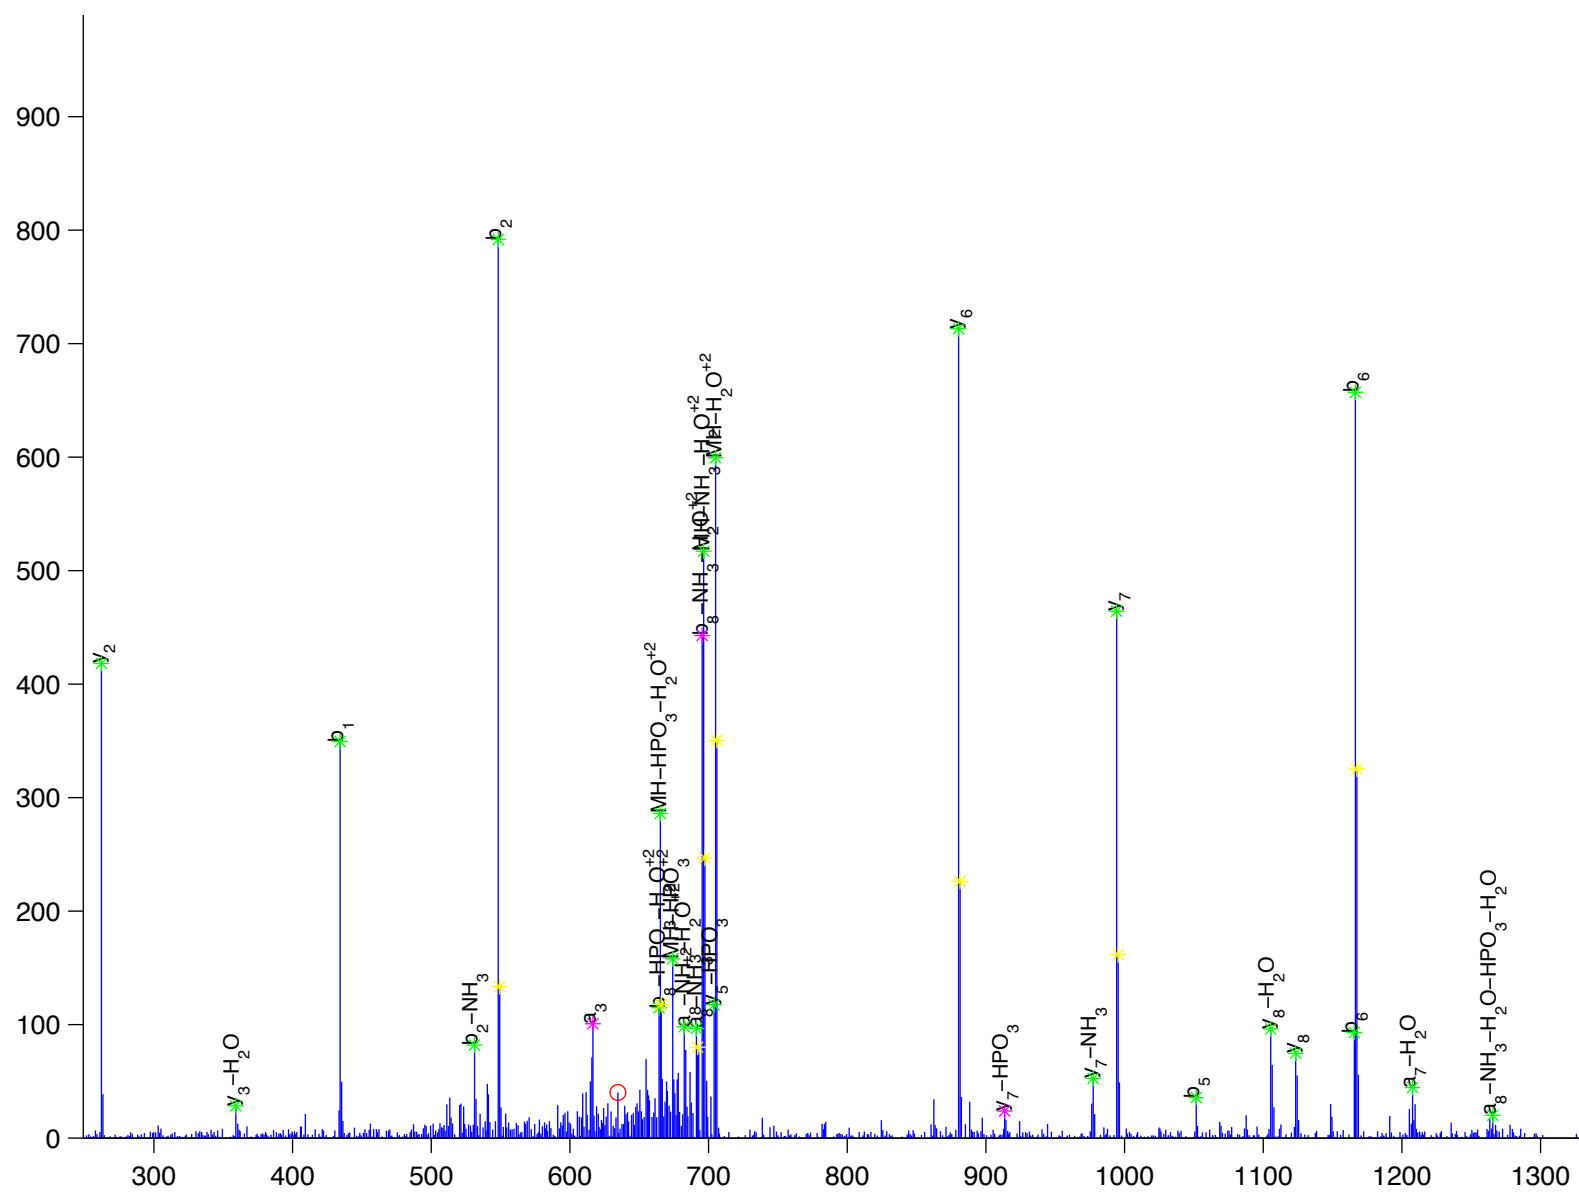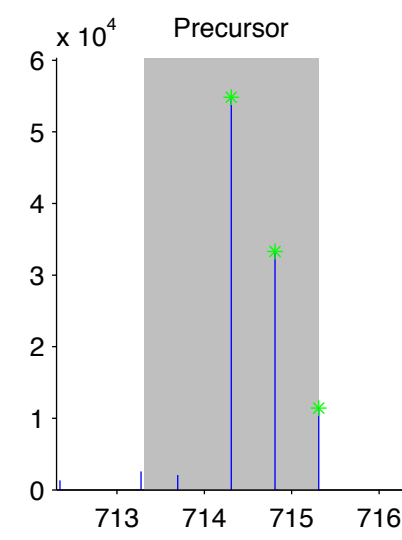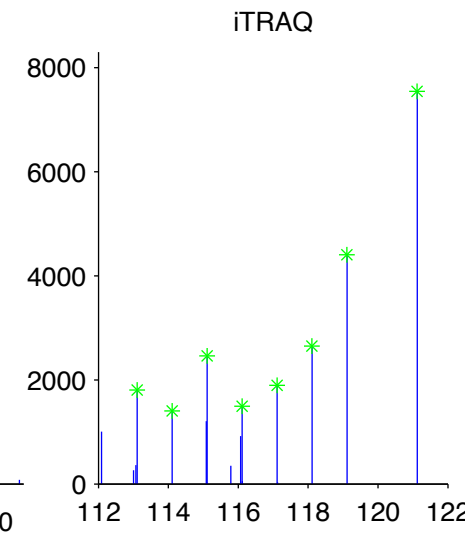

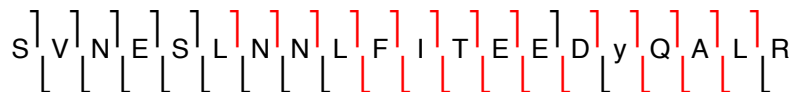

clathrin, heavy polypeptide (Hc)

Charge State: +3

Scan Number: 6423

File Name: 100905ptp1blivers\_ncHFD\_basal.raw

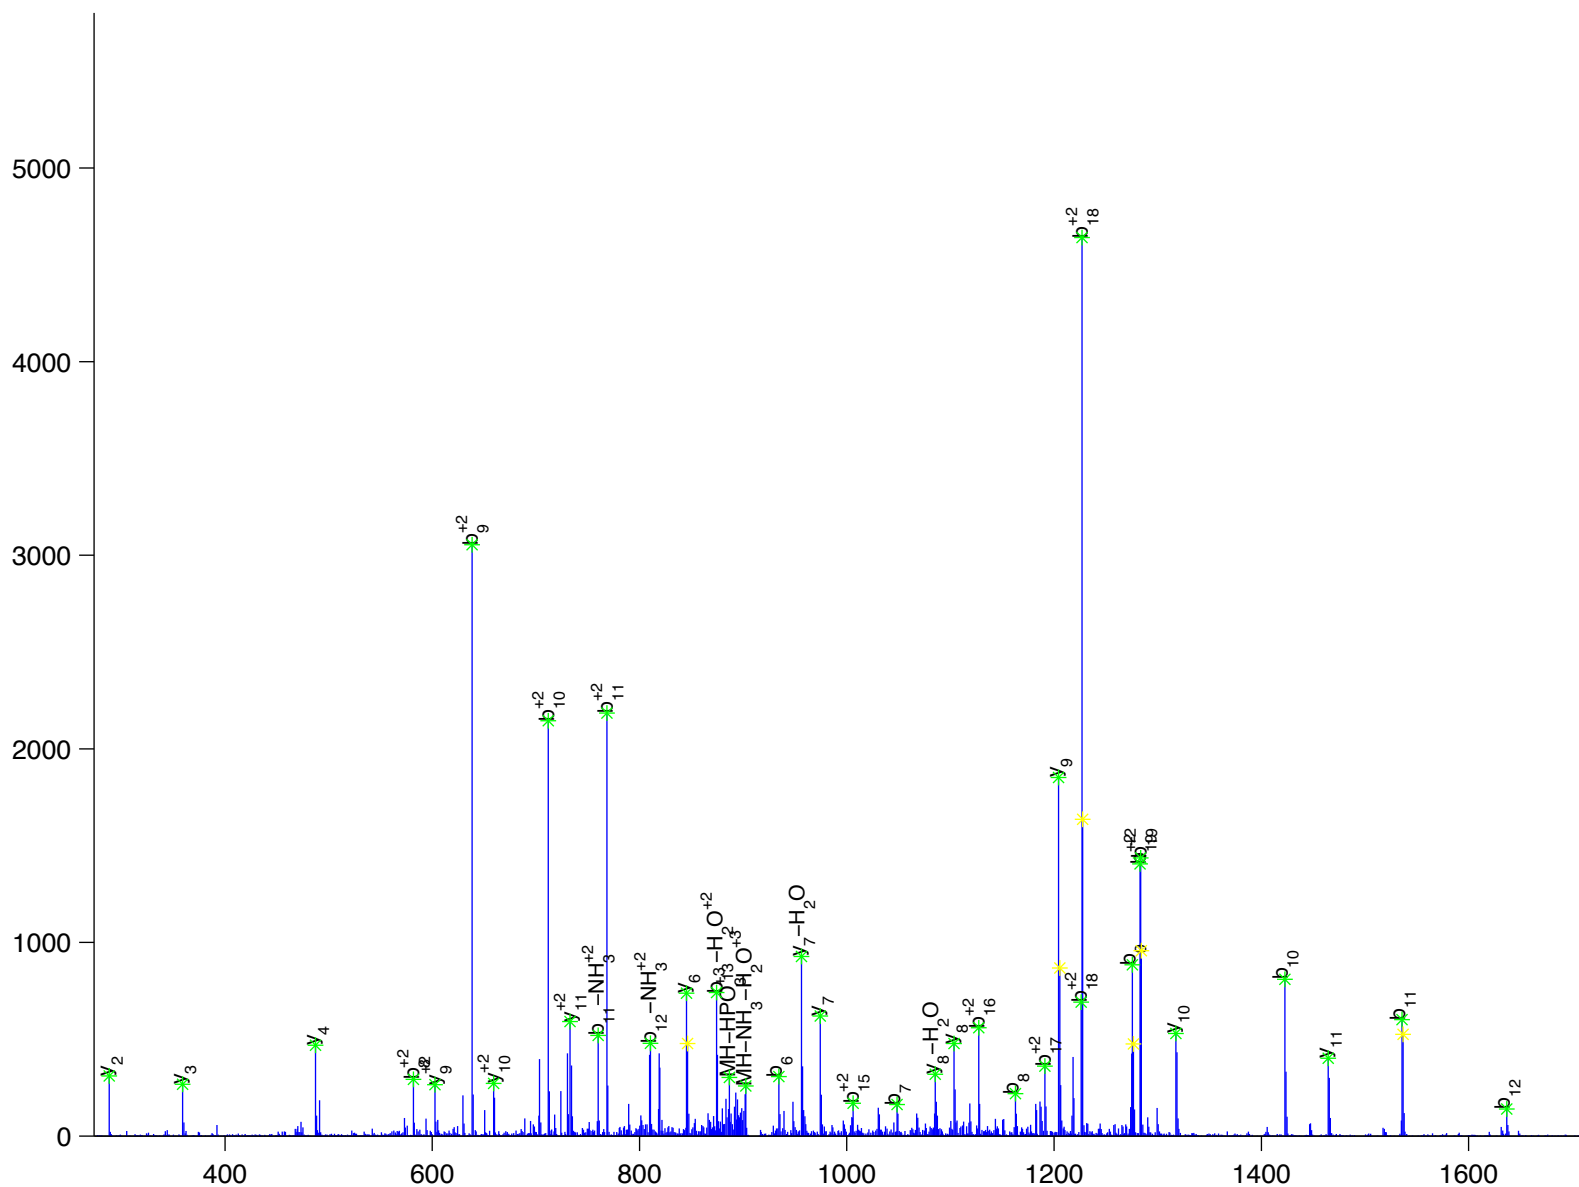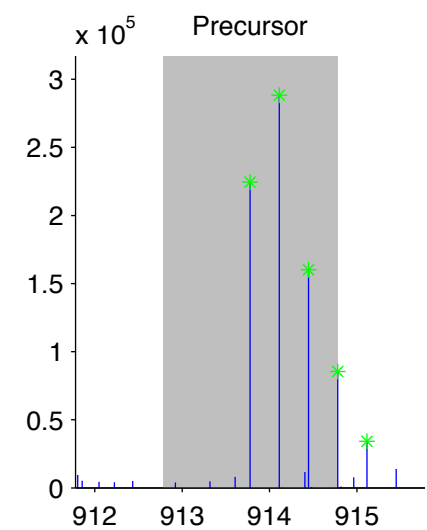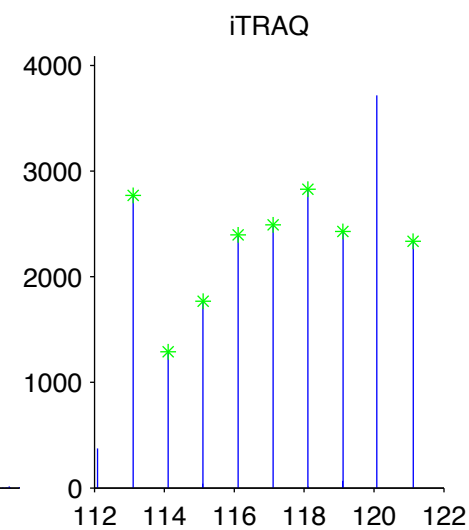

T [ S ] I [ D ] A [ y ] D [ N ] F [ D ] N [ I ] S [ L ] A [ Q ] R

clathrin, heavy polypeptide (Hc)

Charge State: +3

Scan Number: 7989

File Name: 0090807ptp1blivers\_M\_HFD2.raw

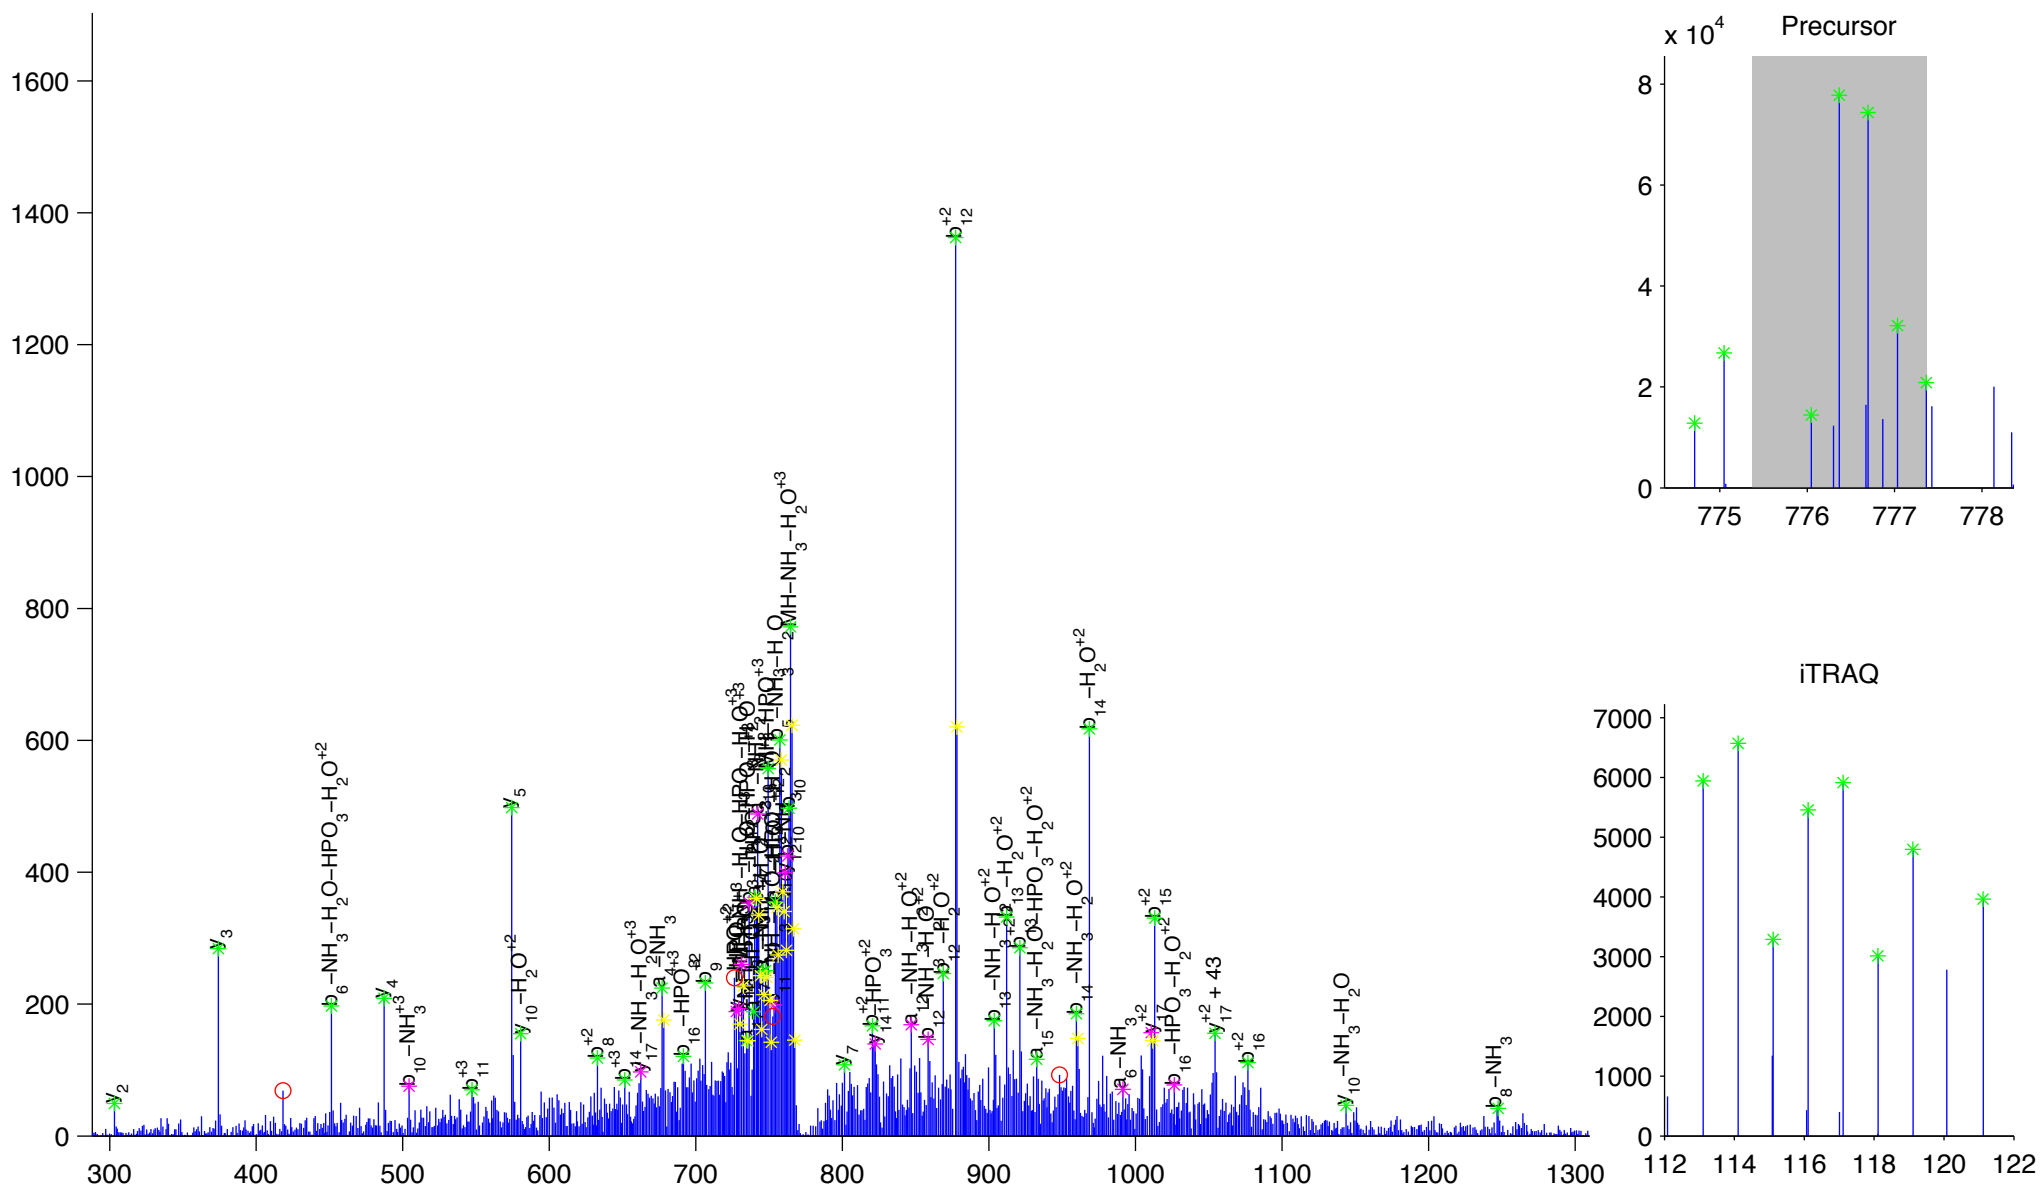

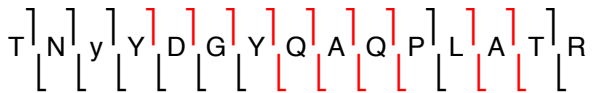

claudin 2  
Charge State: +3  
Scan Number: 4449  
File Name: 090806ptp1blivers\_M\_NC2.raw

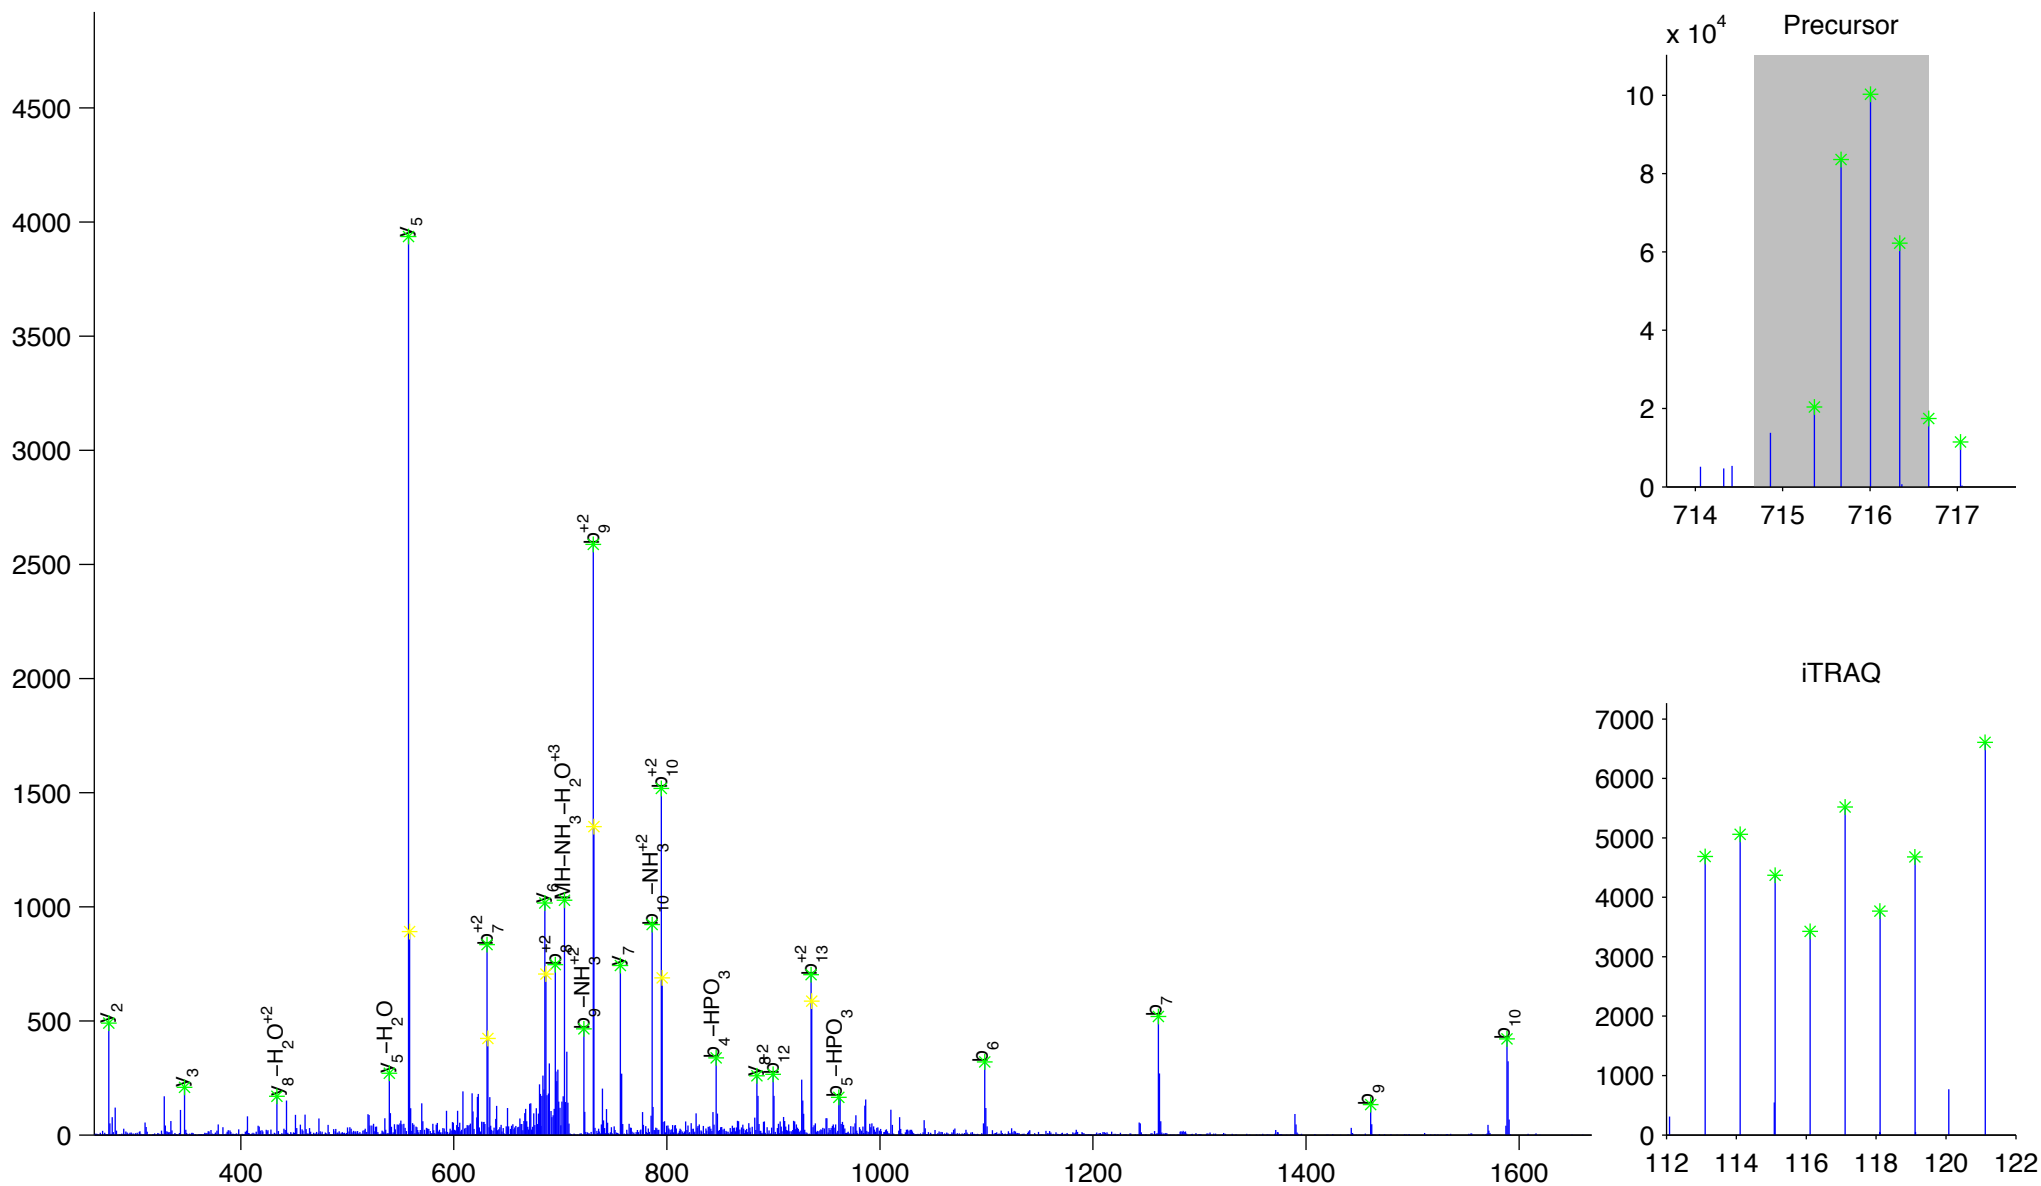

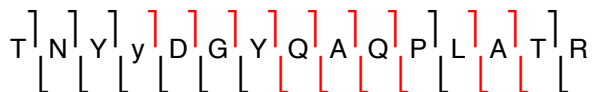

claudin 2

Charge State: +3

Scan Number: 4449

File Name: 090806ptp1blivers\_M\_NC2.raw

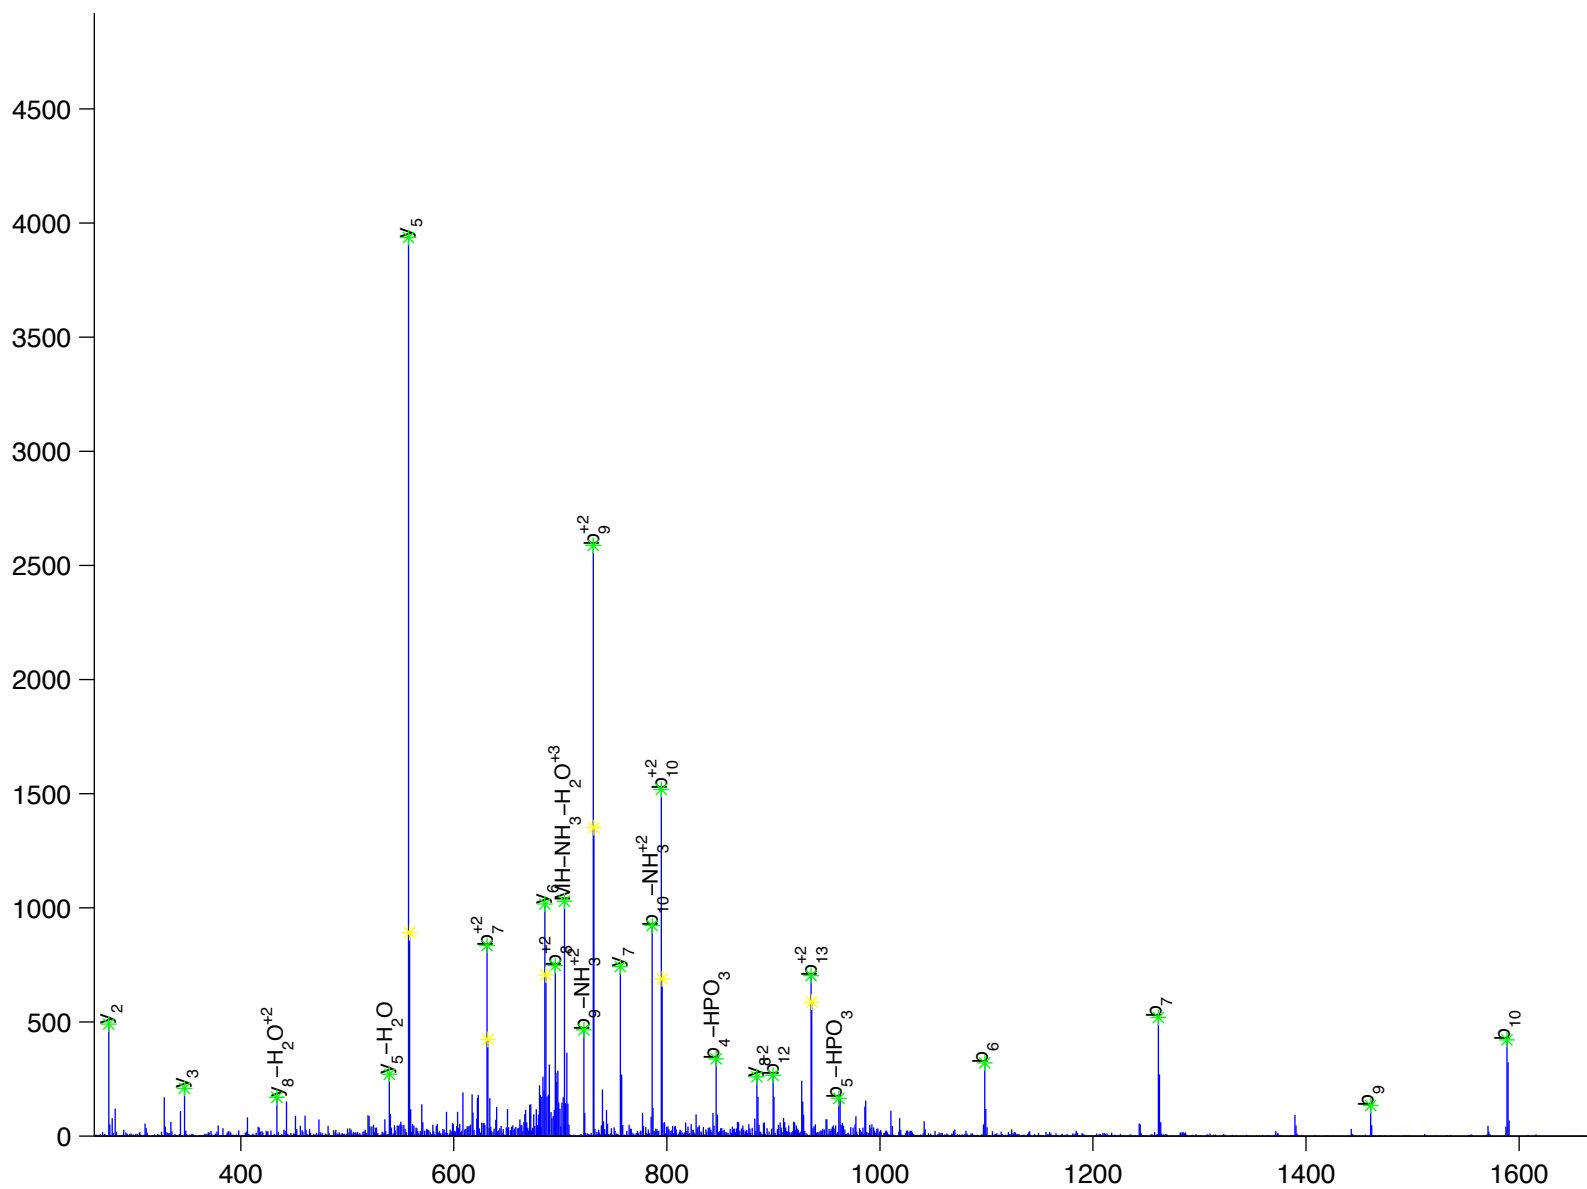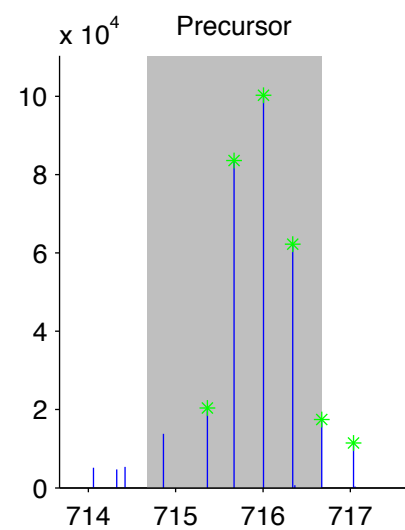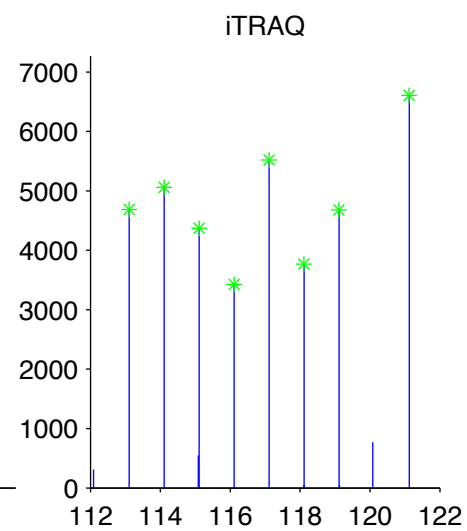

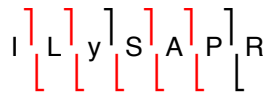

claudin 3

Charge State: +2

Scan Number: 4284

File Name: 090728ptp1blivers\_M\_NC\_ins\_e.raw

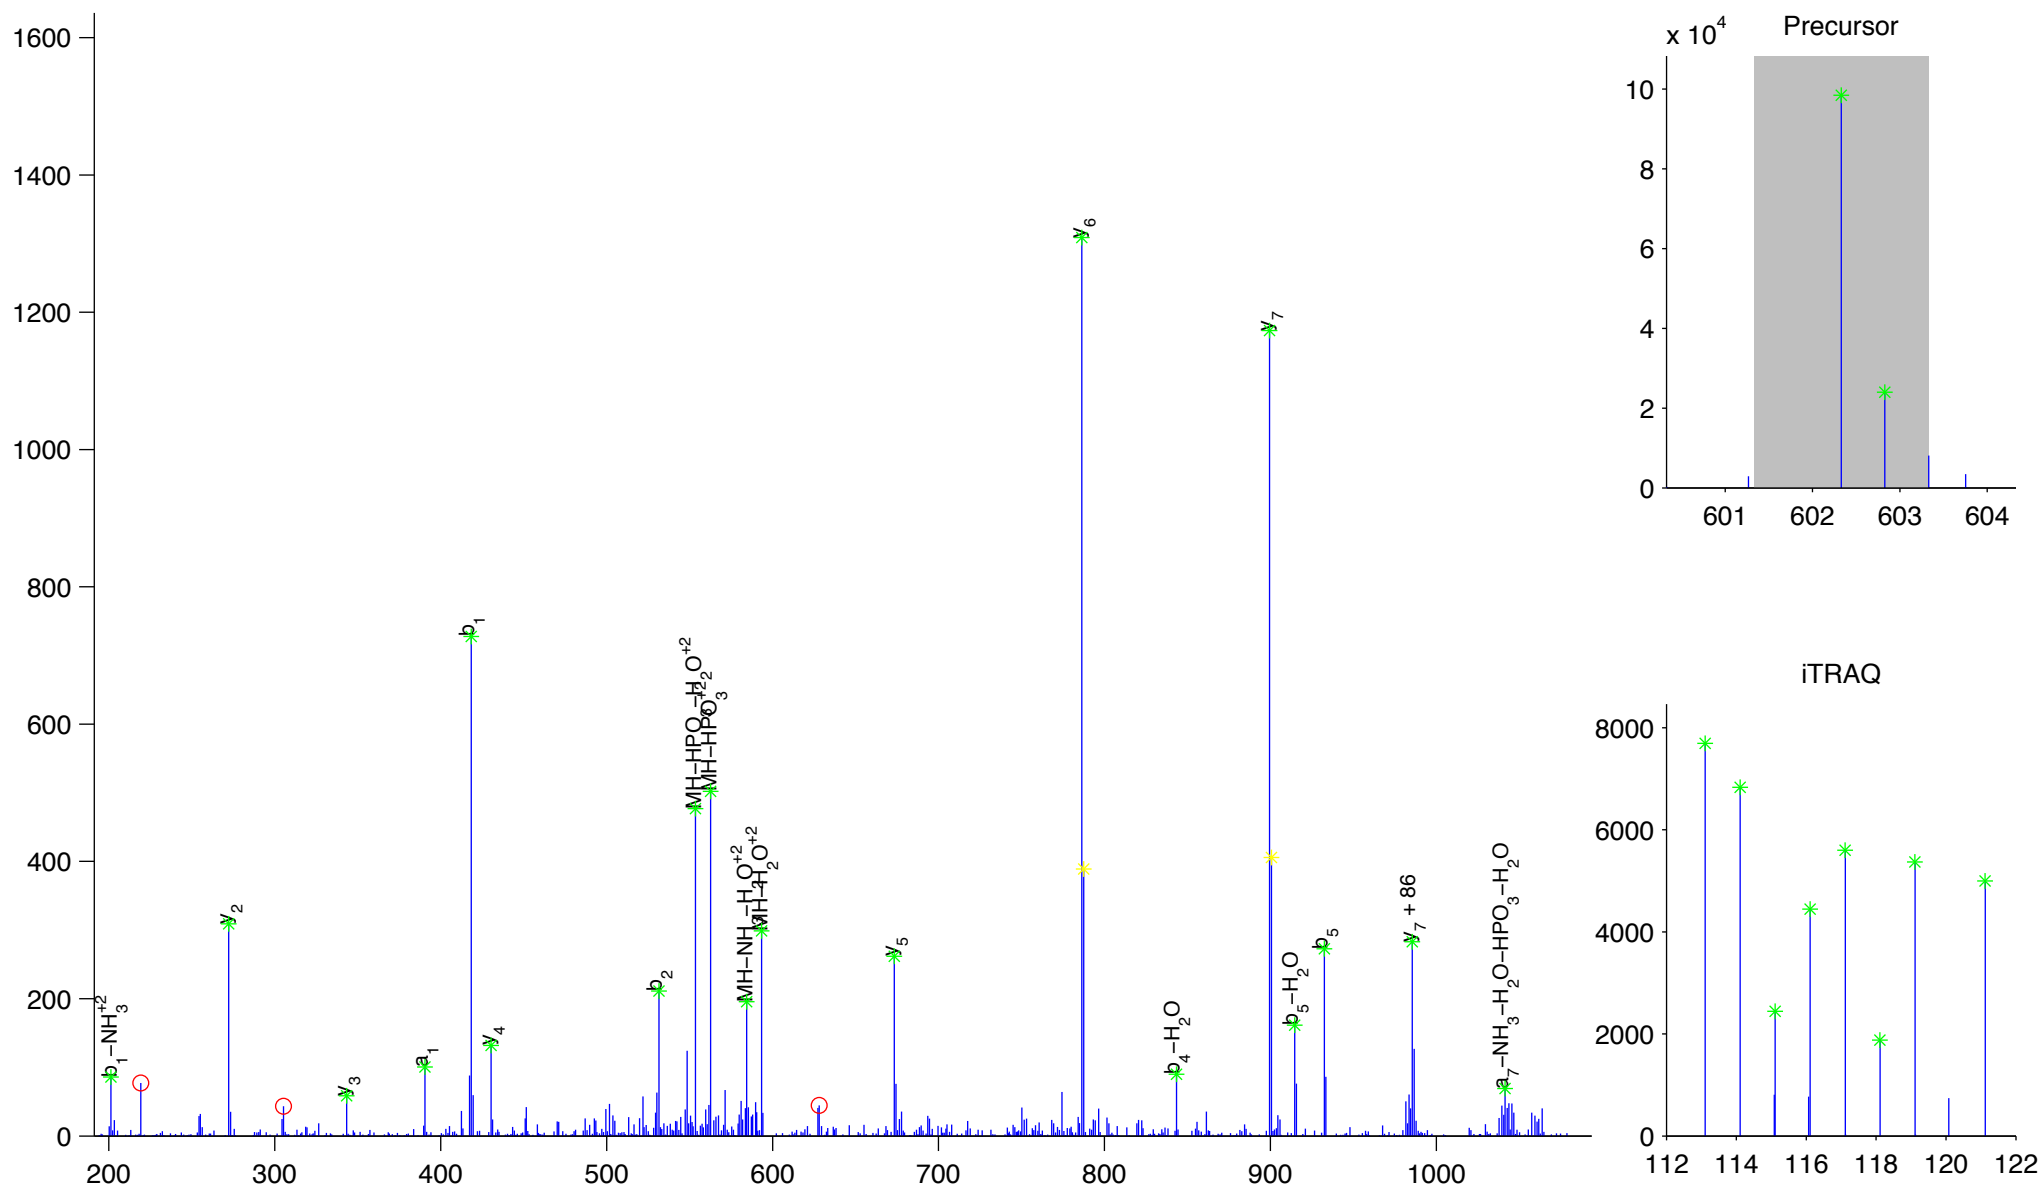



I [G] [E] [G] [T] y [G] [V] [V] [Y] K

cyclin-dependent kinase 2 isoform 2

Charge State: +3

Scan Number: 5525

File Name: 091130ptp1blivers\_hfd\_basal2.raw

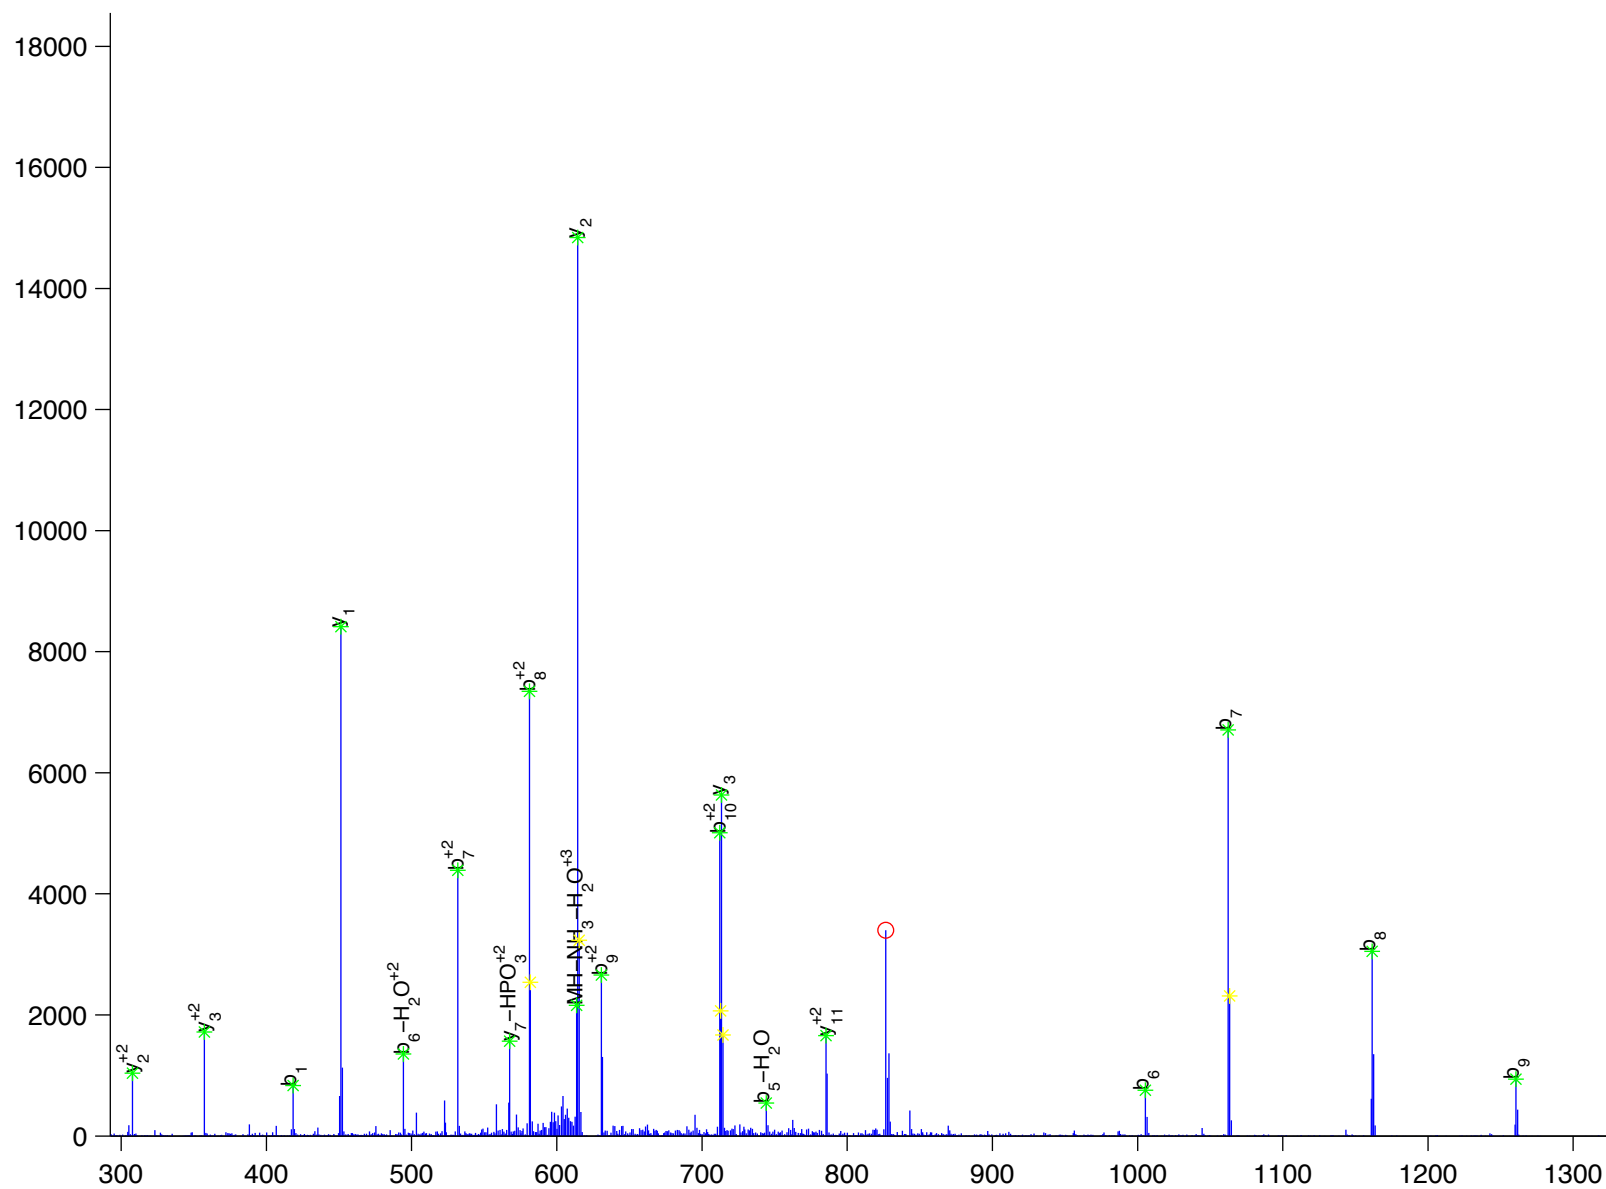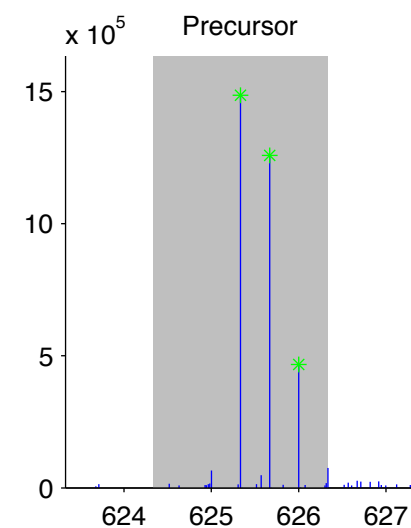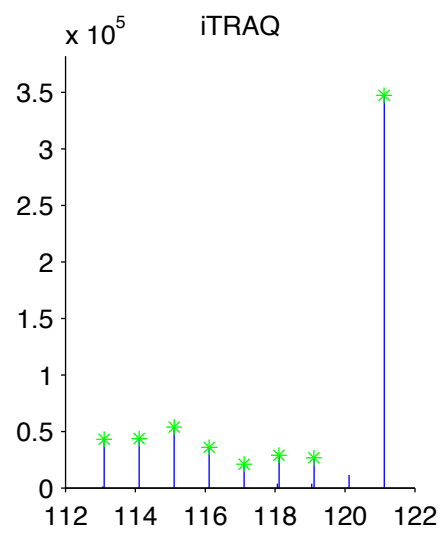

N L S E G N N A N Y T E y V A T R

cyclin-dependent kinase-like 5

Charge State: +3

Scan Number: 4280

File Name: 090806ptp1blivers\_M\_NC2.raw

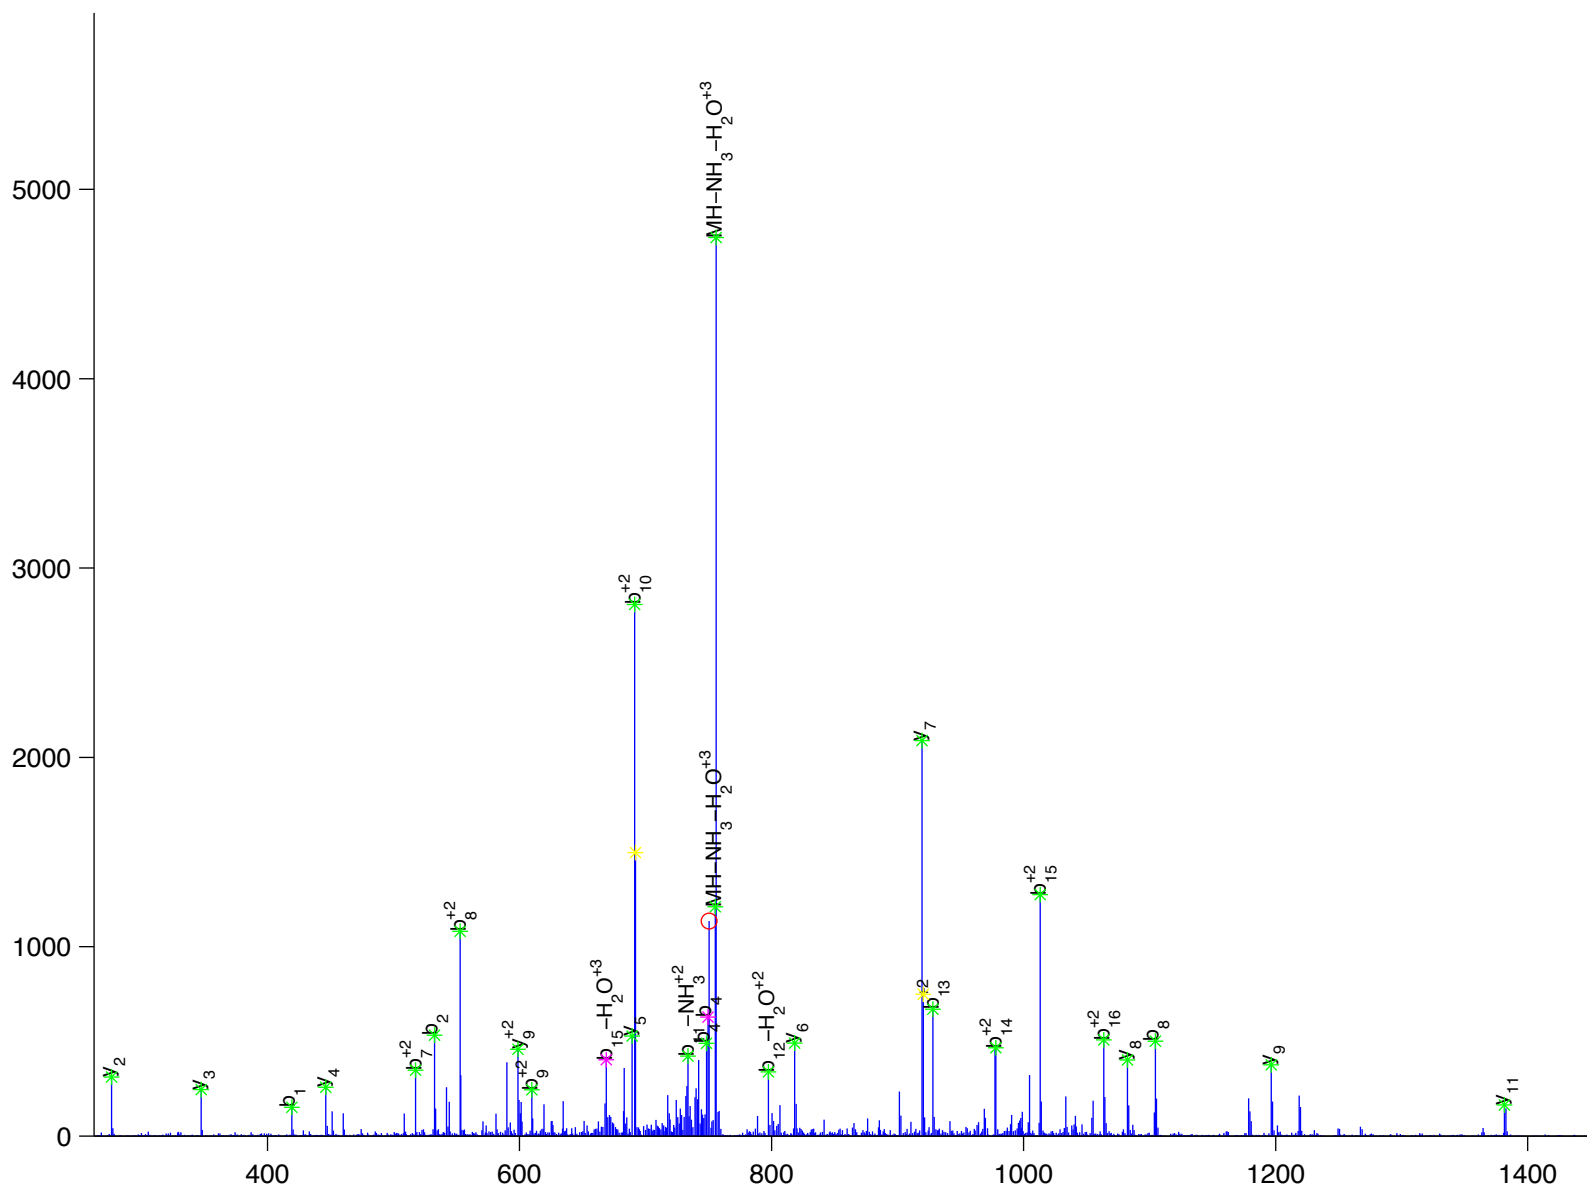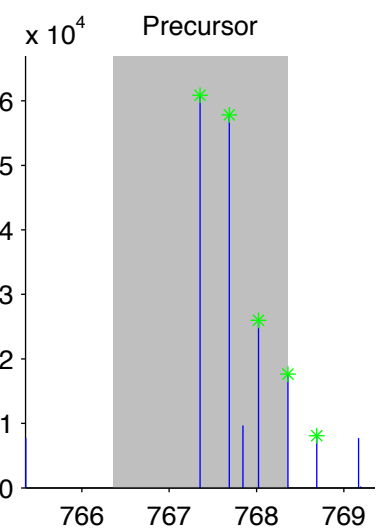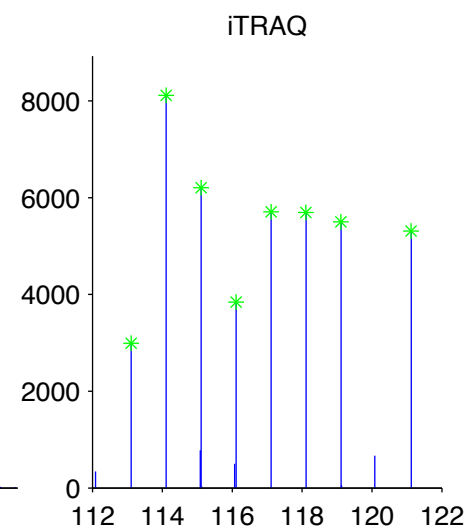

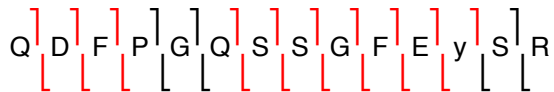

cystathionase

Charge State: +

Scan Number: 4669

File Name: 100611ptp1blivers\_nc\_basal.raw

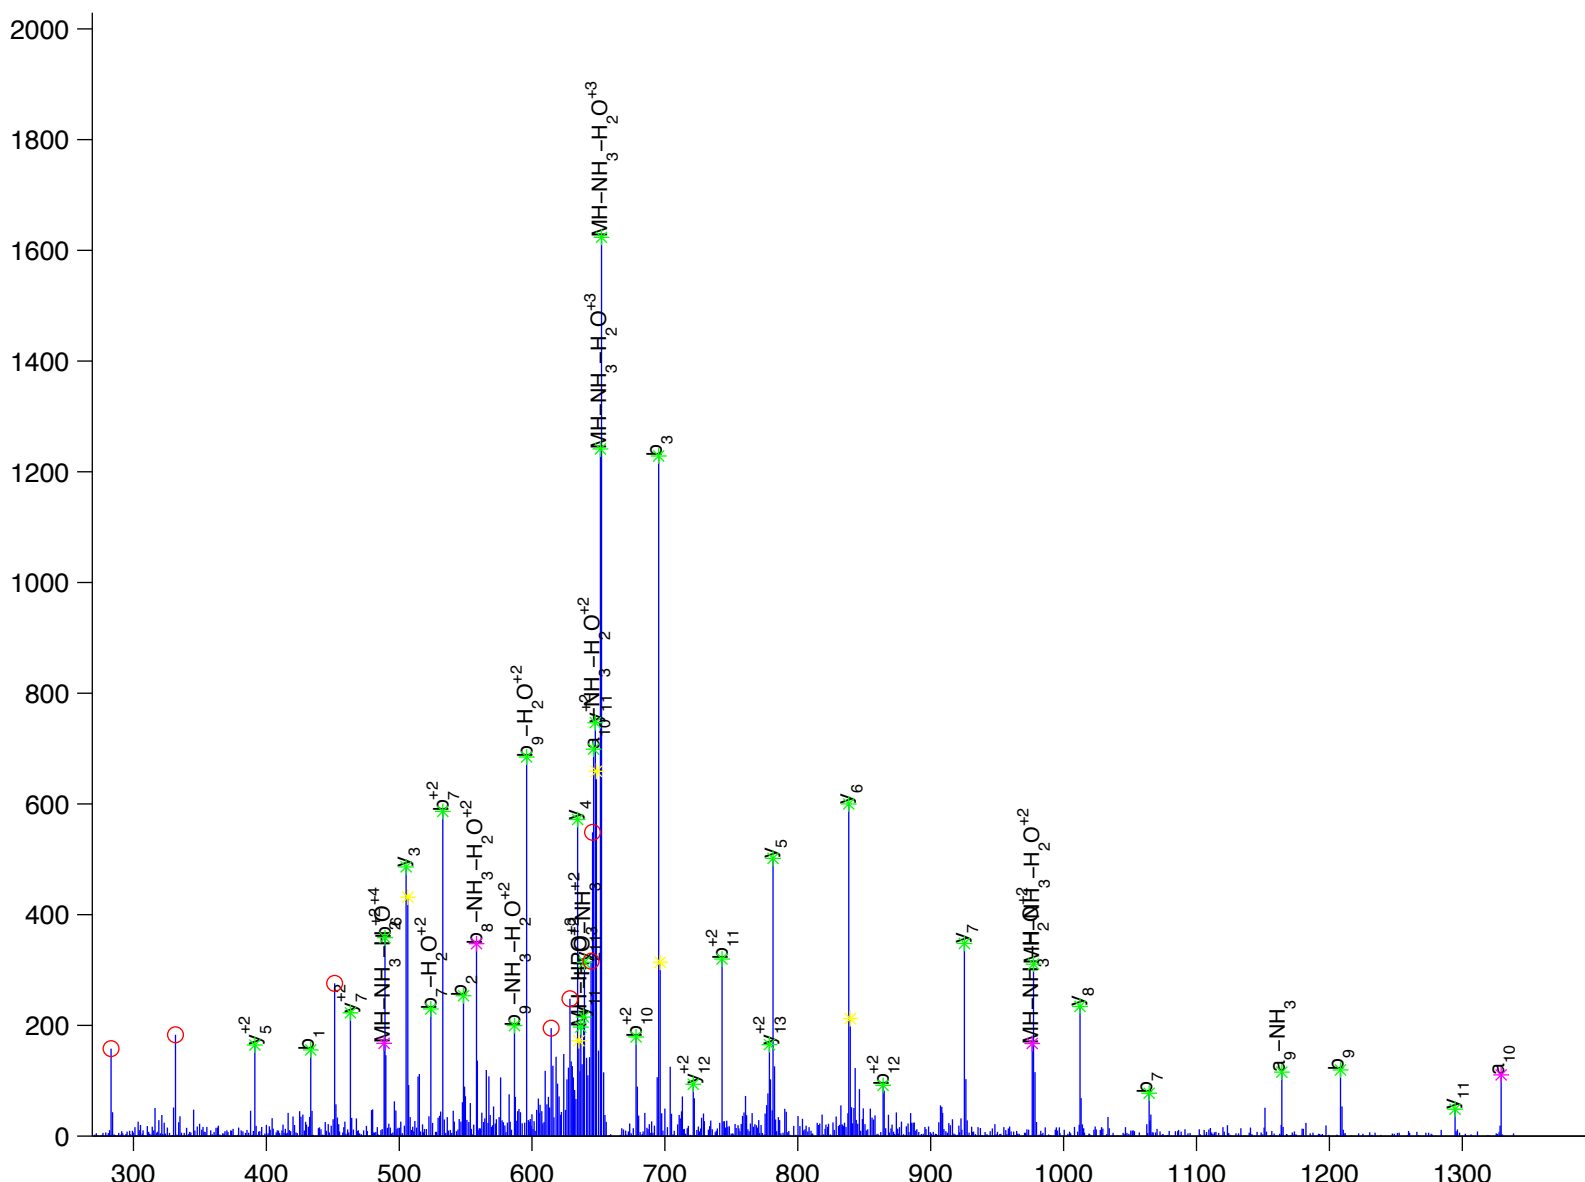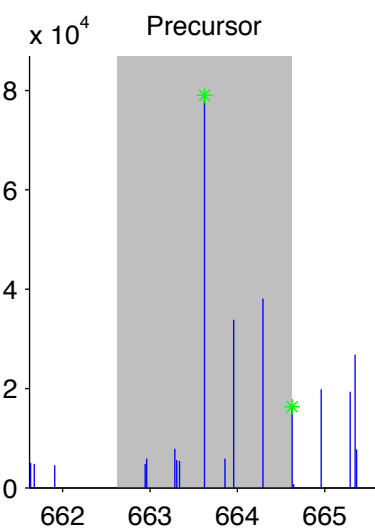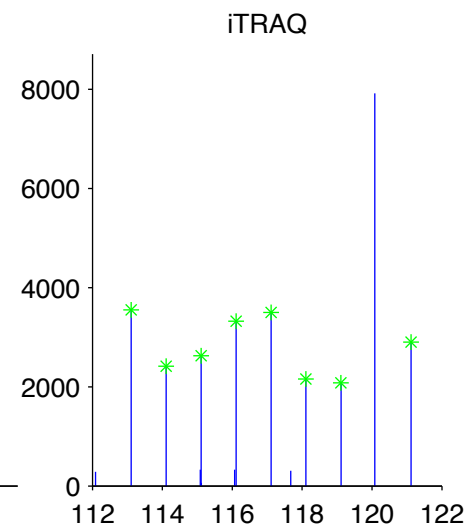

A [G] [D] [E] [I] [I] [C] [M] [D] [E] [V] y [G] [G] [T] [N] R

cystathionase

Charge State: +3

Scan Number: 5064

File Name: 100905ptp1blivers\_ncHFD\_basal.raw

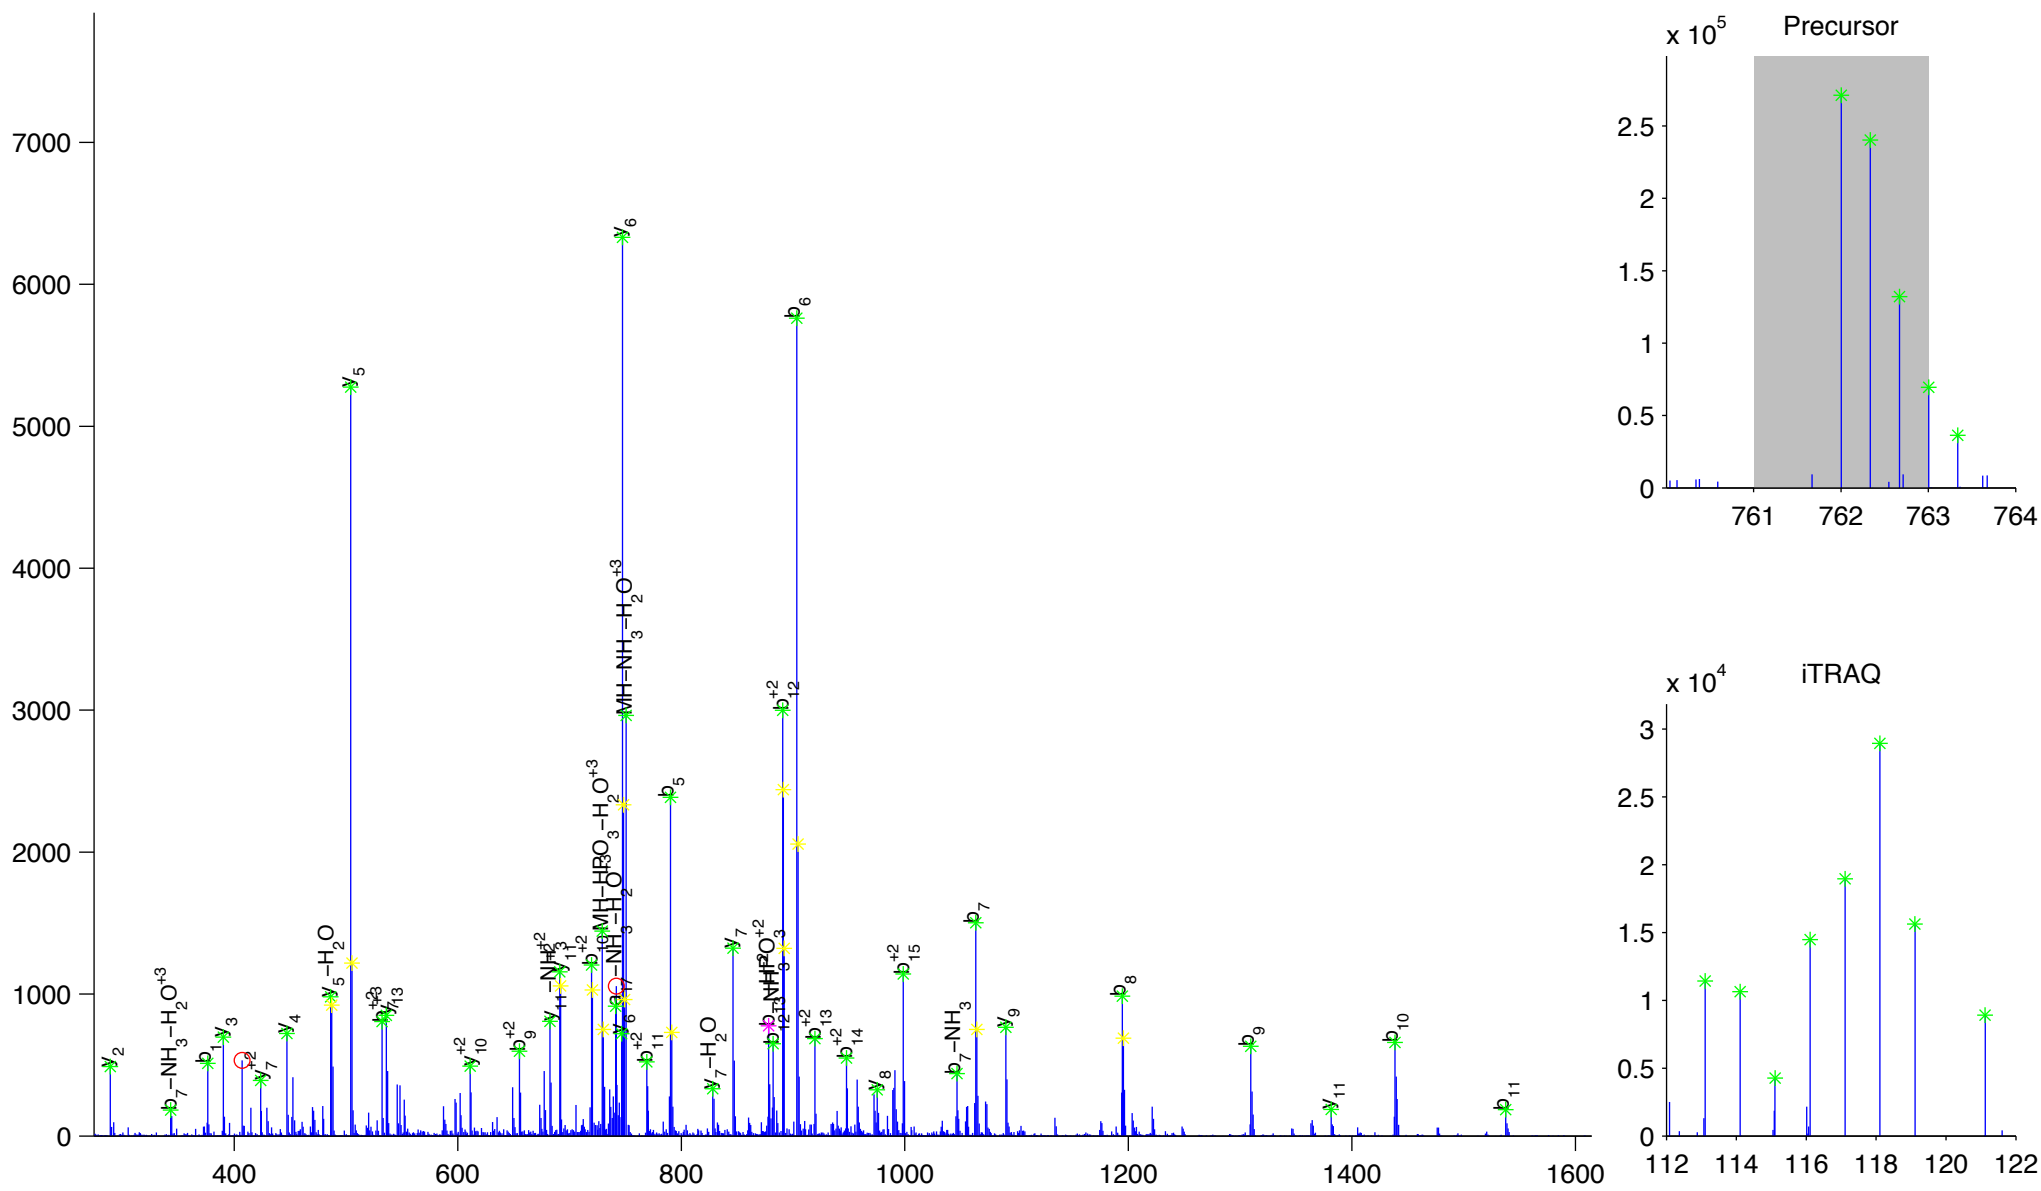

y [ Y ] [ T ] [ L ] [ E ] [ E ] [ I ] [ Q ] K

cytochrome b-5

Charge State: +3

Scan Number: 4894

File Name: 100905ptp1blivers\_ncHFD\_basal.raw

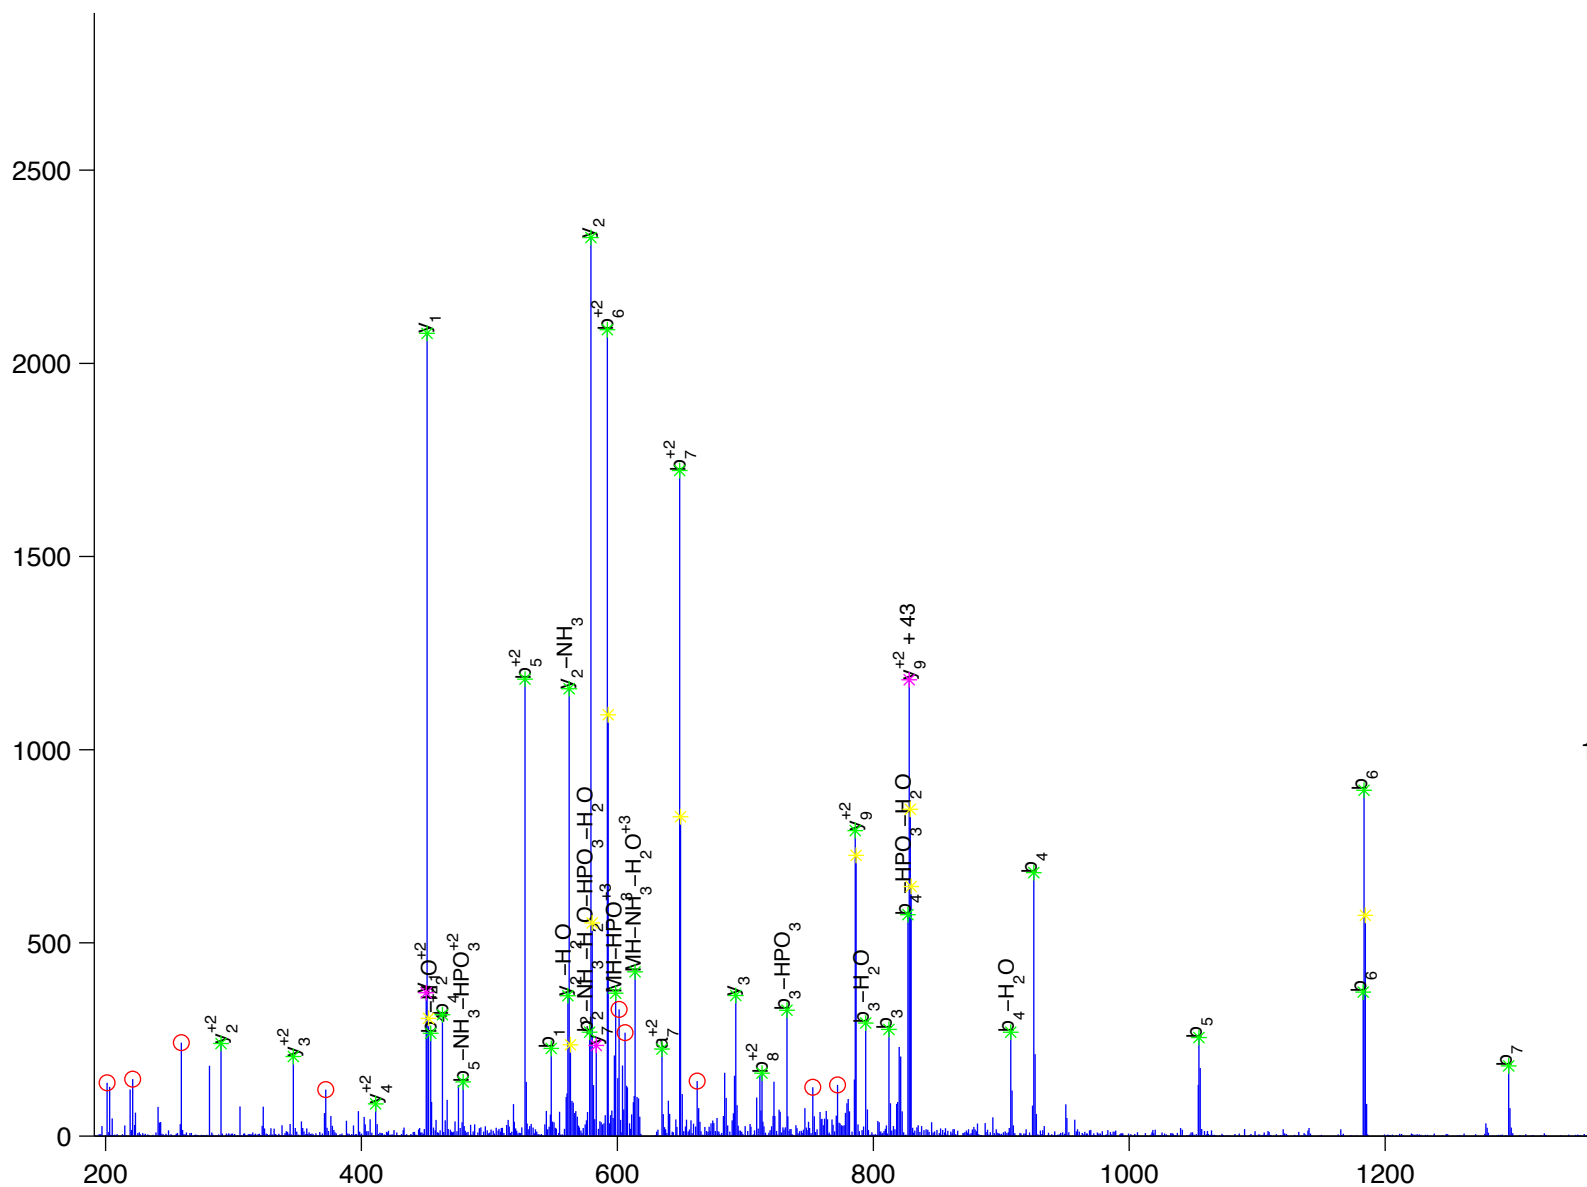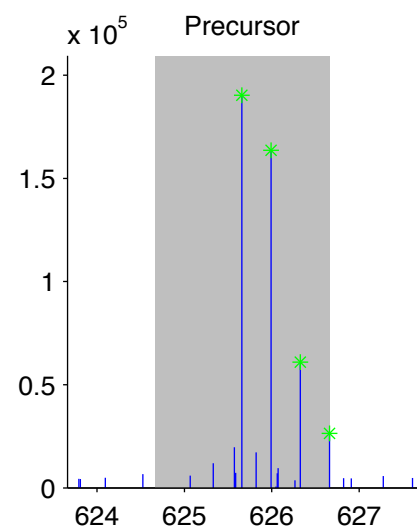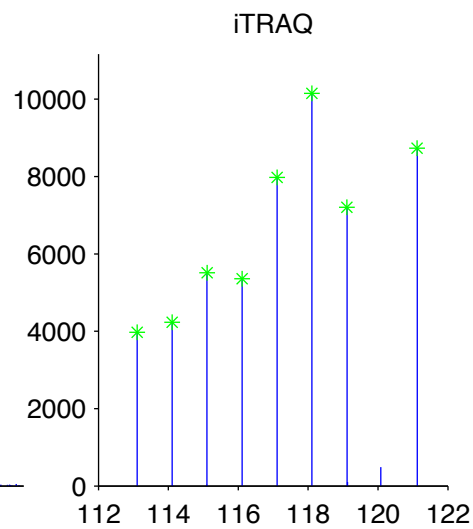

Y[S]D[y]F[K]

cytochrome P450, family 2, subfamily e, polypeptide 1

Charge State: +2

Scan Number: 4976

File Name: 090806ptp1blivers\_M\_NC2.raw

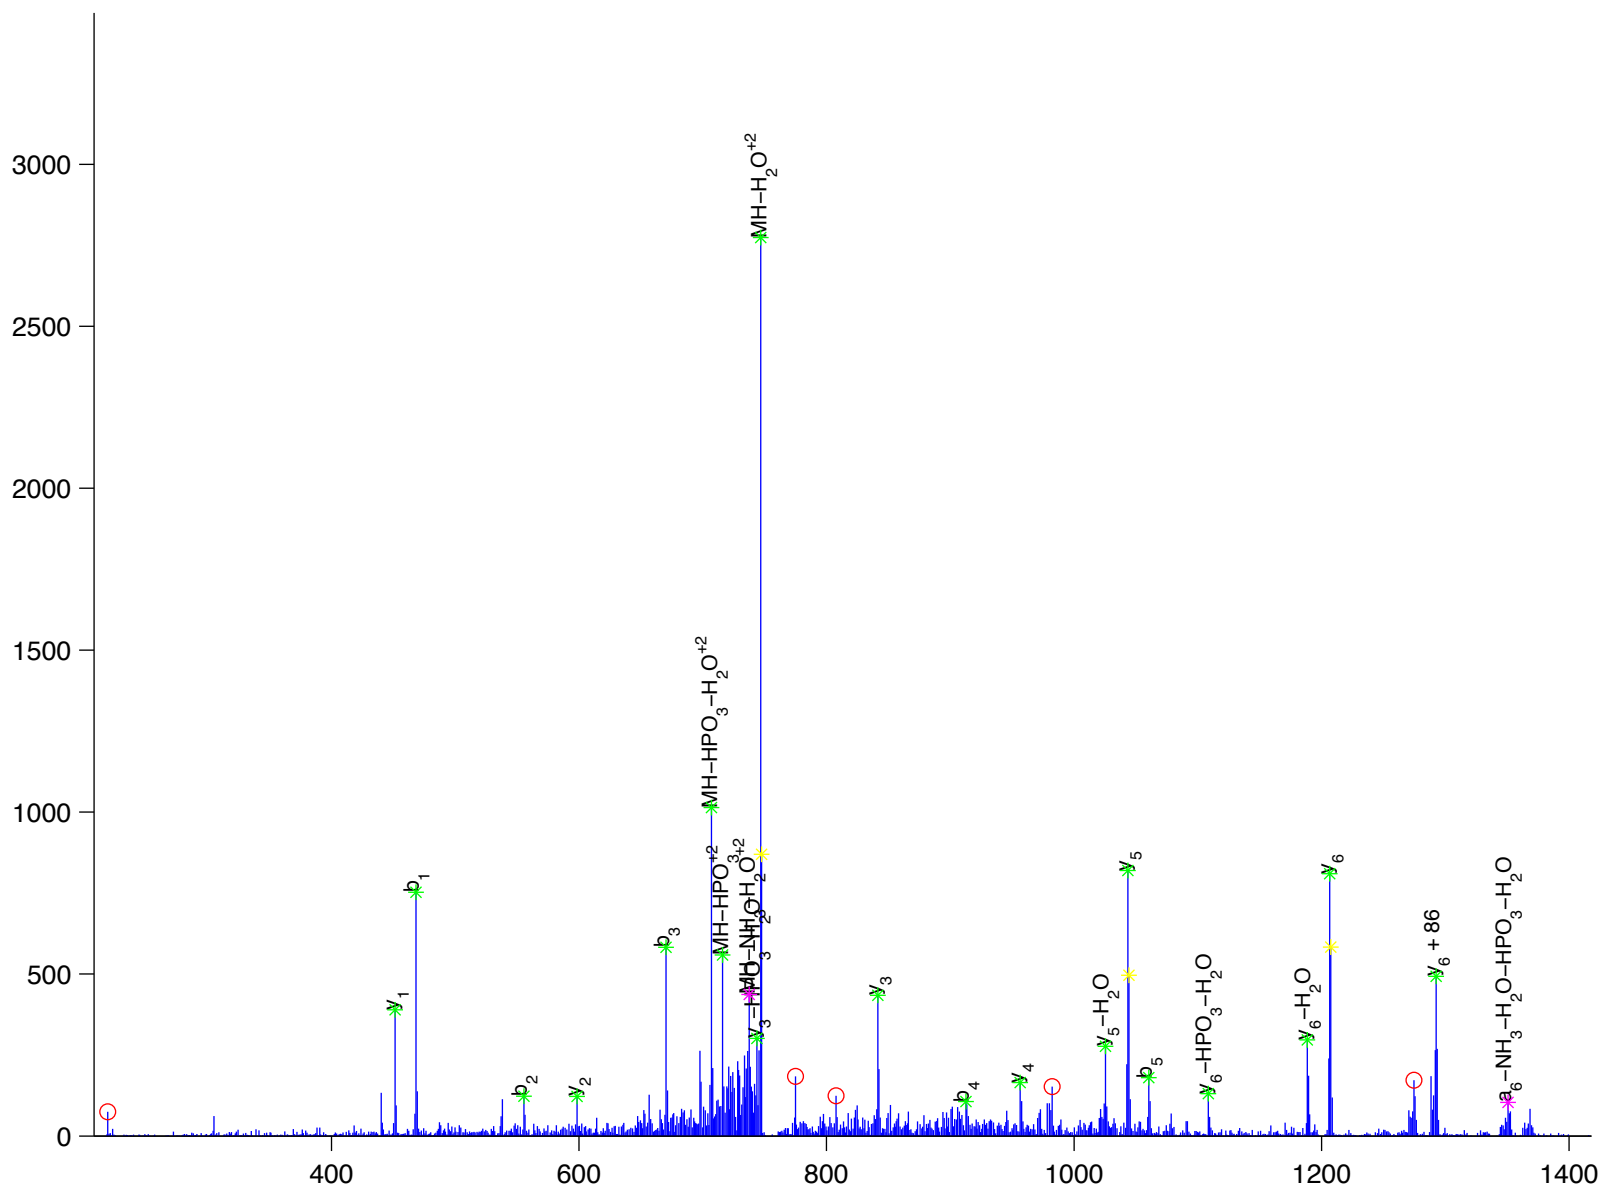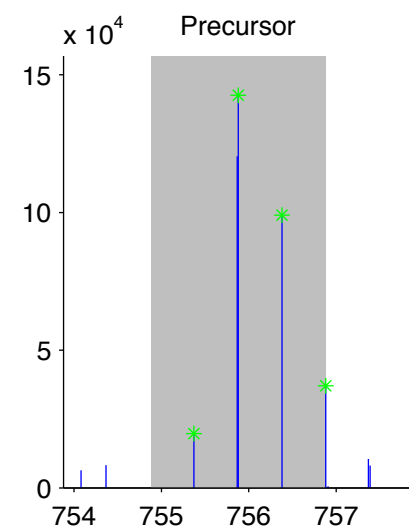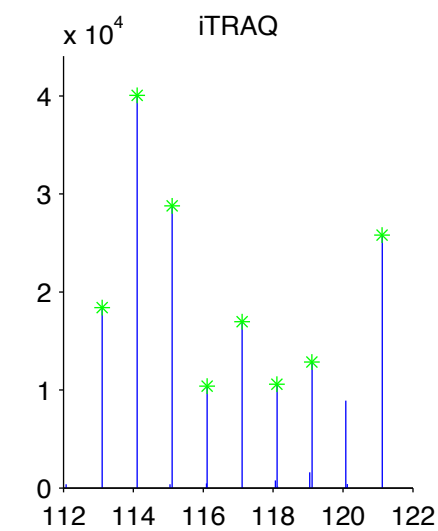

Y[V]L[D]D[Q]y[T]S[S]S[G]A[K]

cytoplasmic tyrosine kinase, Dscr28C related

Charge State: +3

Scan Number: 4508

File Name: 090806ptp1blivers\_M\_NC2.raw

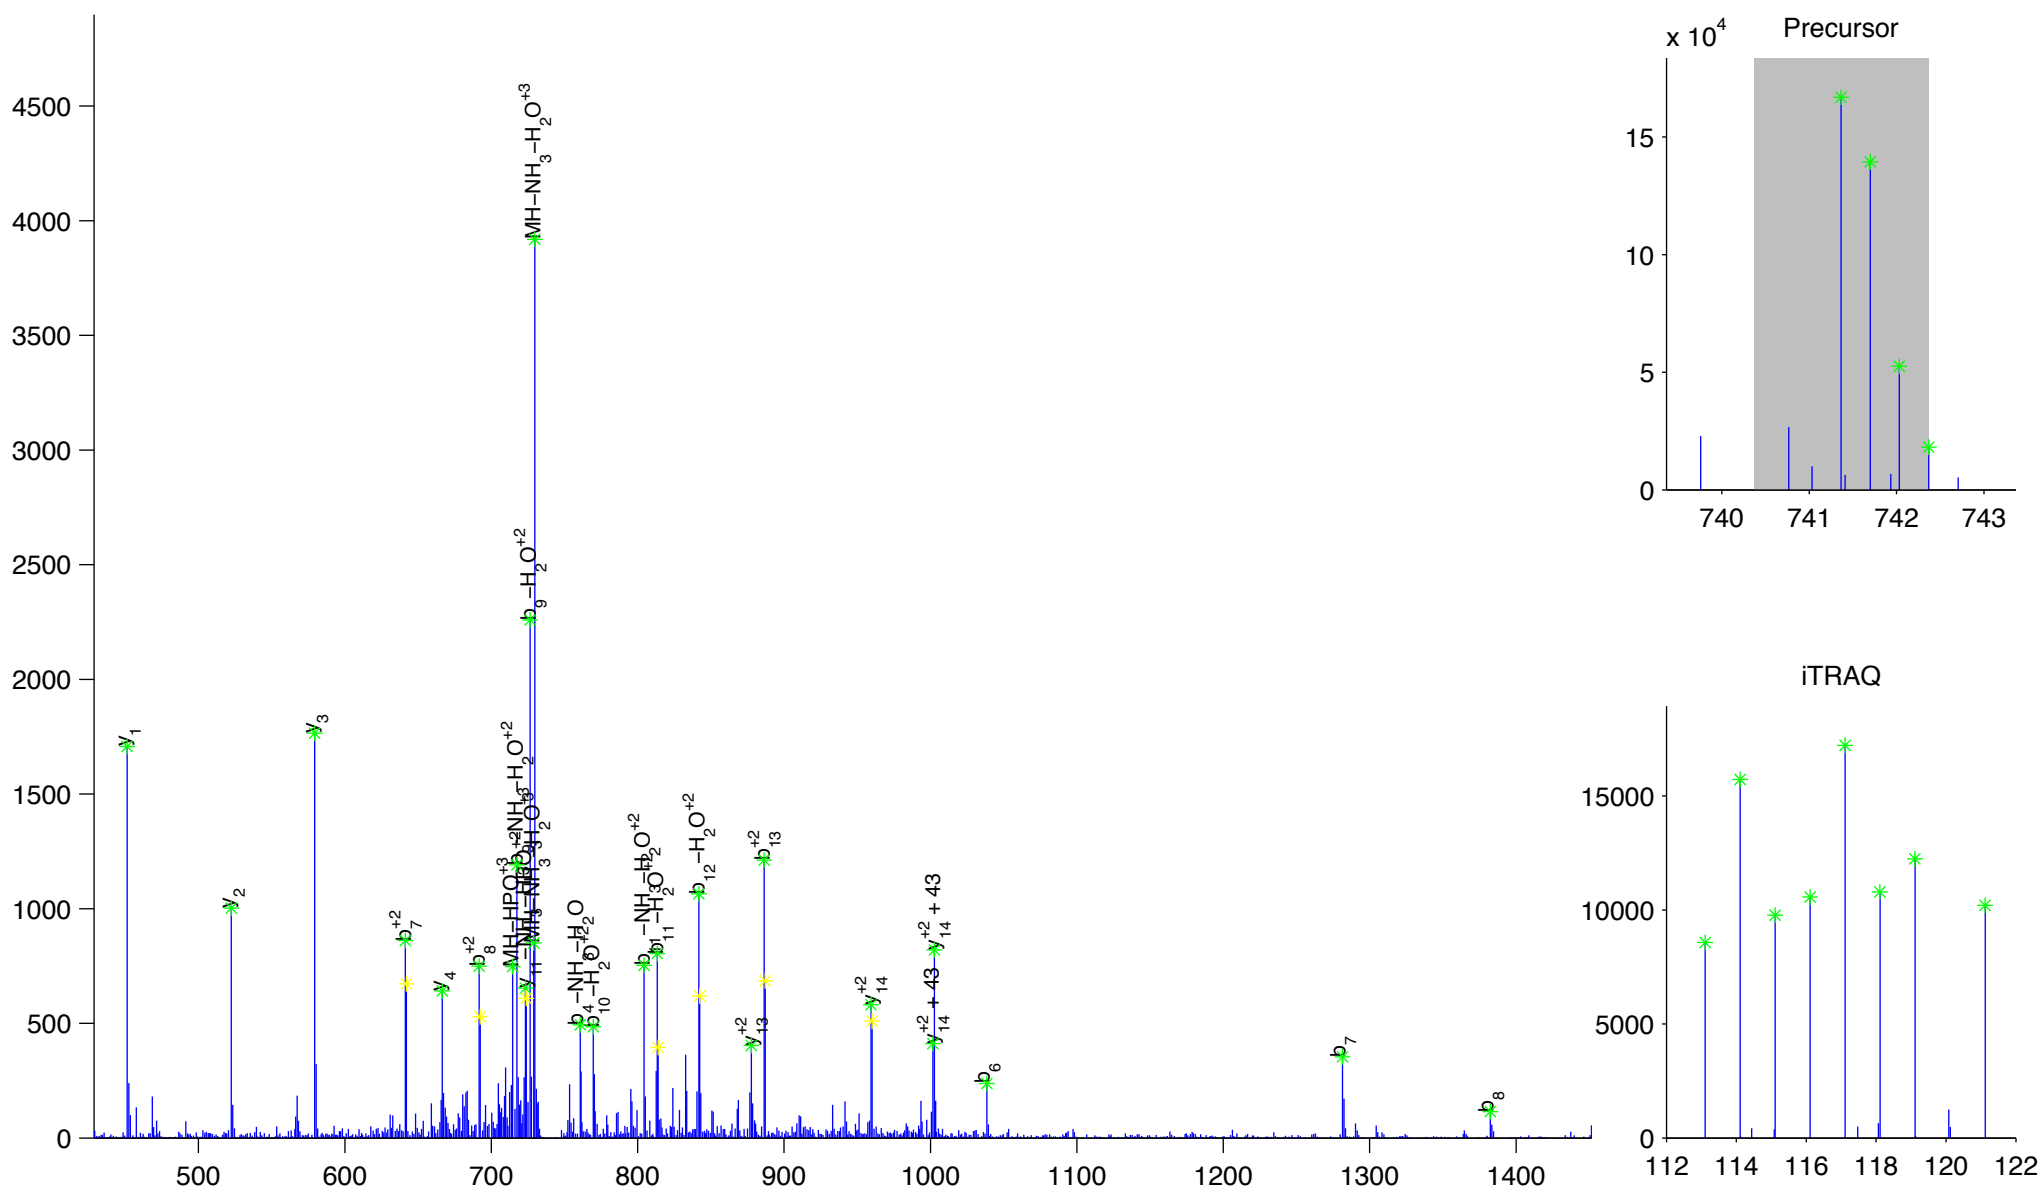

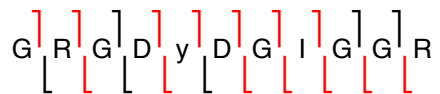

DEAD/H (Asp-Glu-Ala-Asp/His) box polypeptide 3, X-linked  
Charge State: +3  
Scan Number: 3246  
File Name: 091130ptp1blivers\_hfd\_basal2.raw

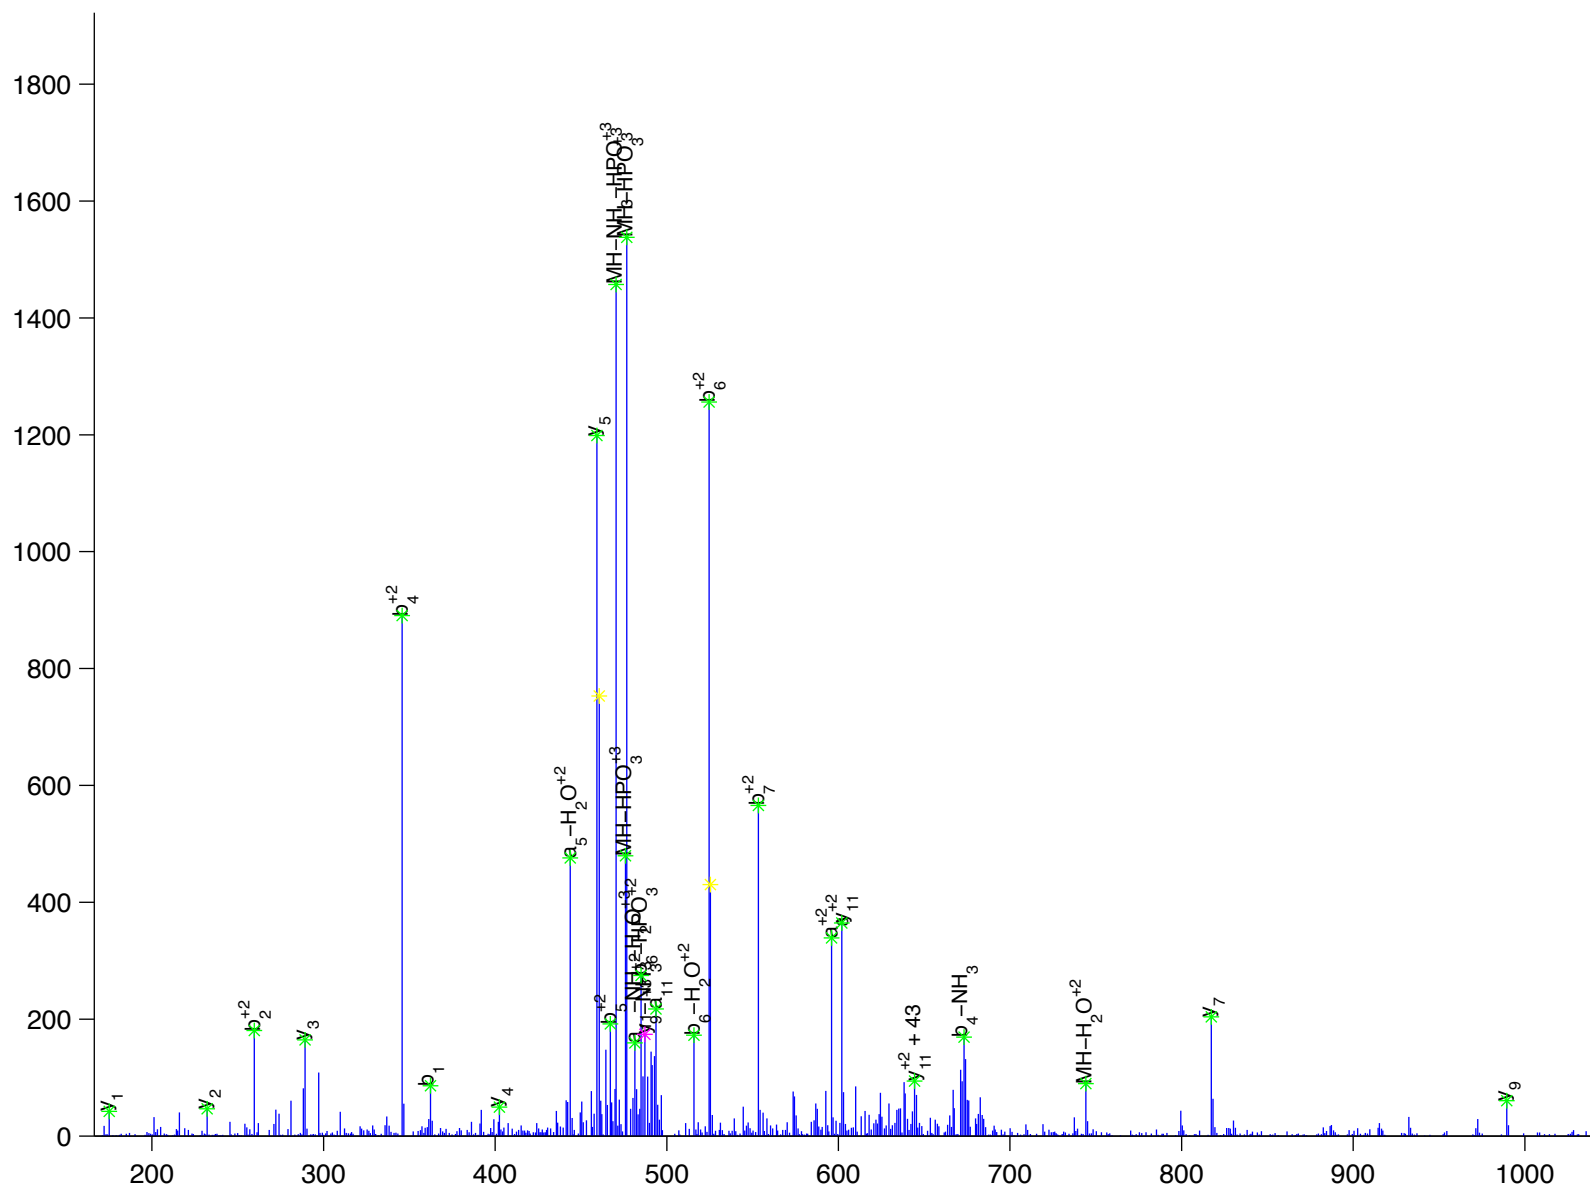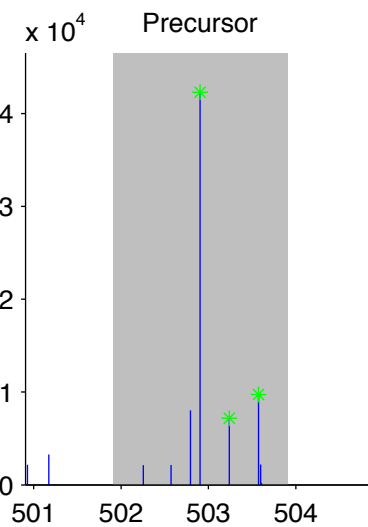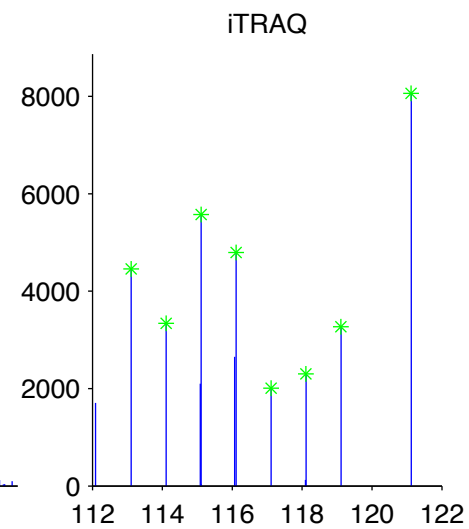



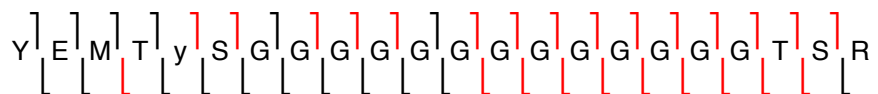

desmoplakin isoform 1

Charge State: +3

Scan Number: 4693

File Name: 090807ptp1blivers\_M\_HFD\_basal.raw

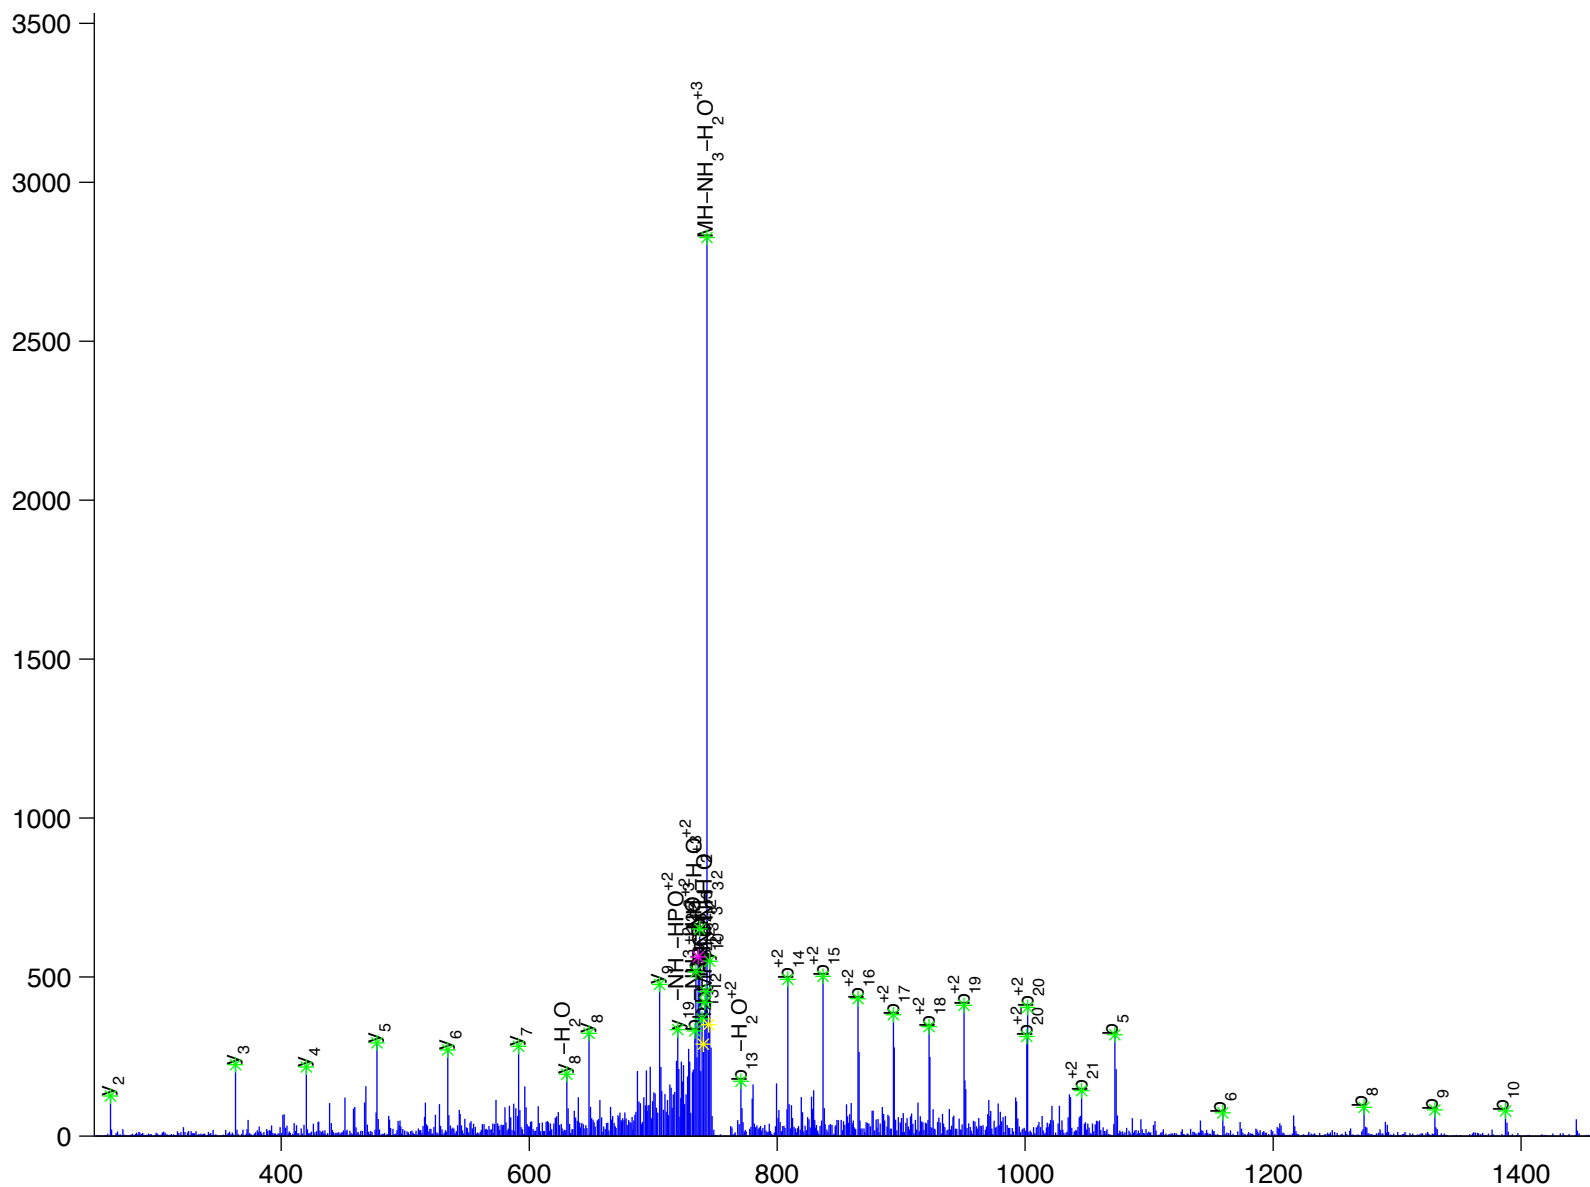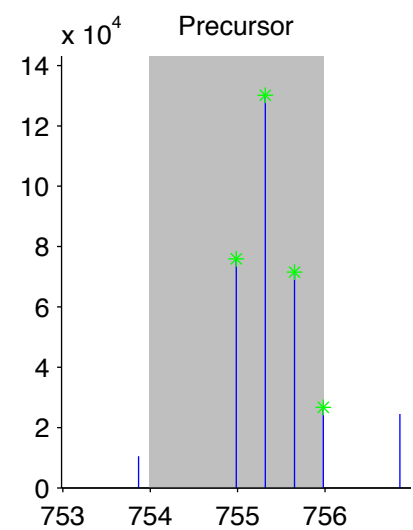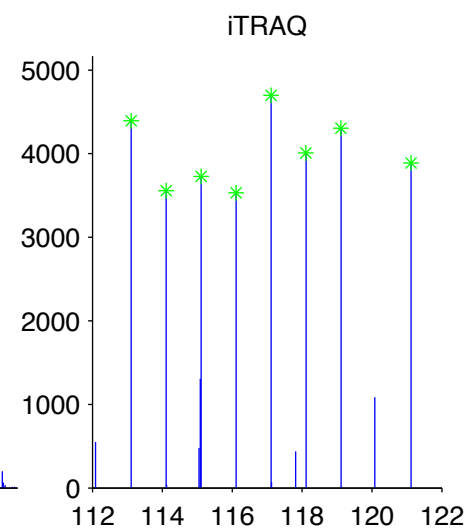

D [ G ] L [ L ] F [ G ] P [ y ] E [ S ] Q [ E ] K

dimethylglycine dehydrogenase precursor

Charge State: +3

Scan Number: 4805

File Name: 100827ptp1blivers\_ncHFD\_basal.raw

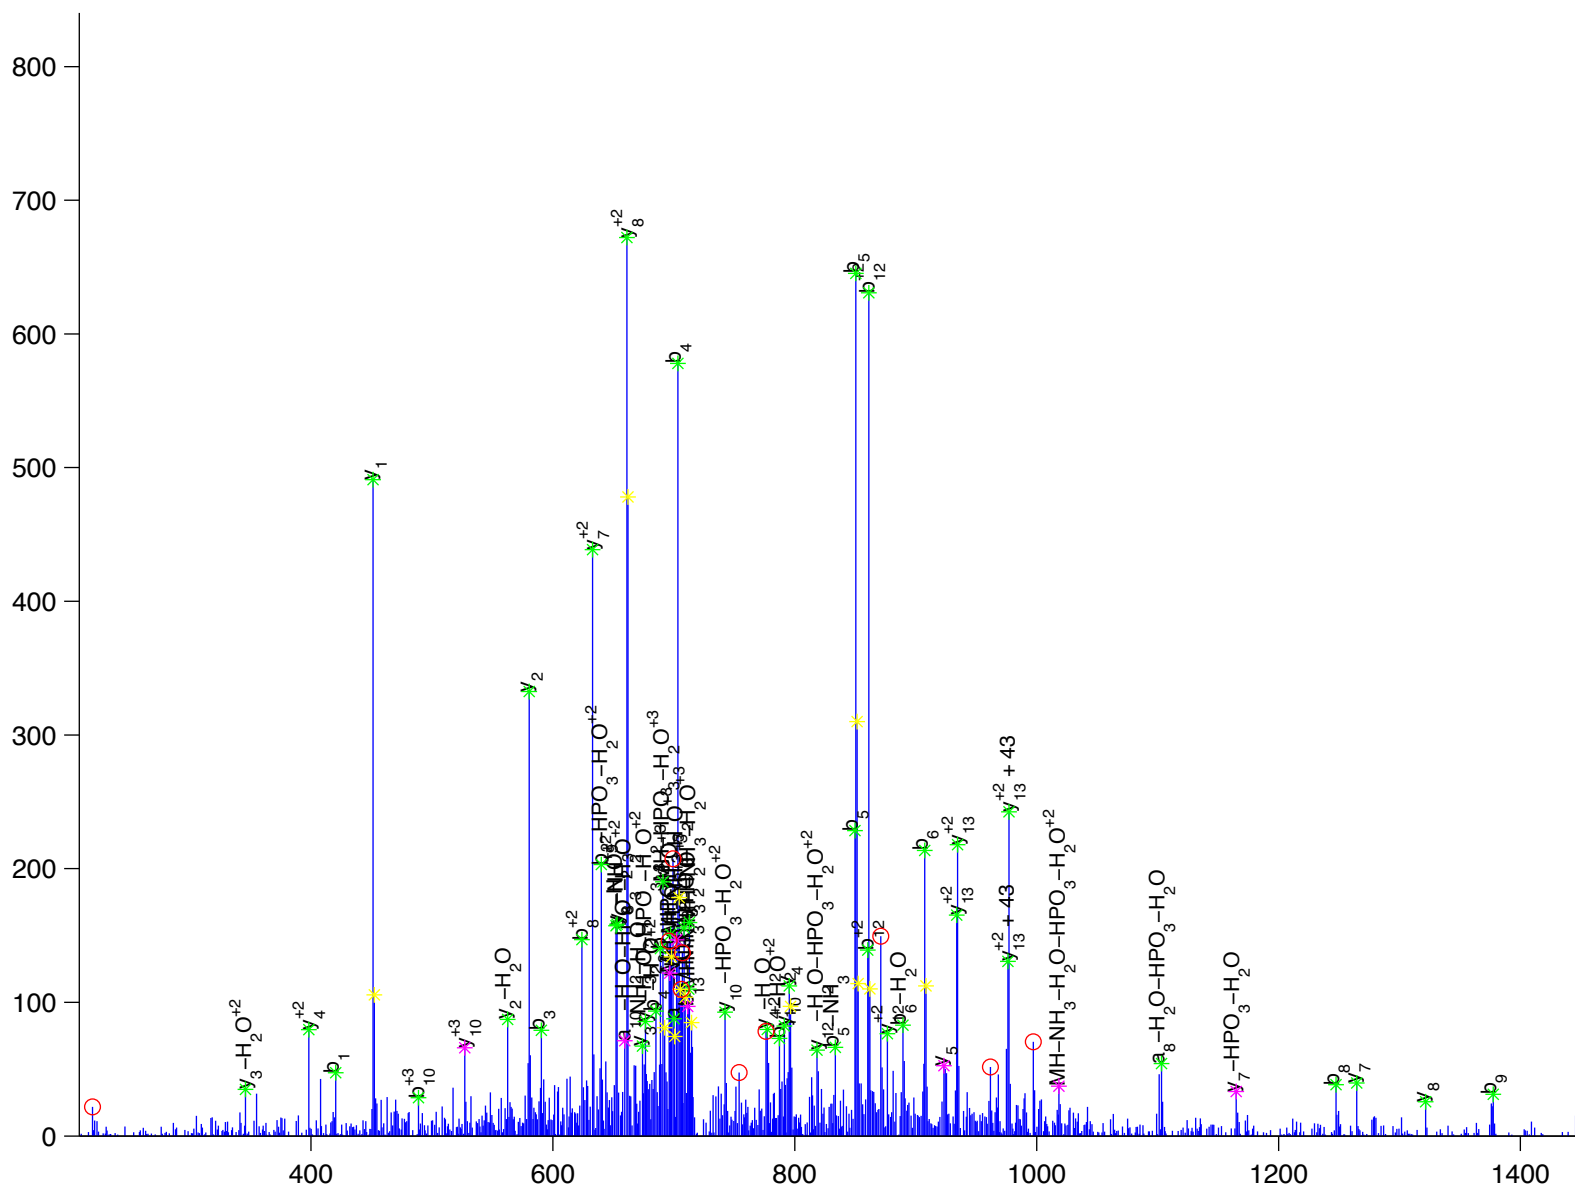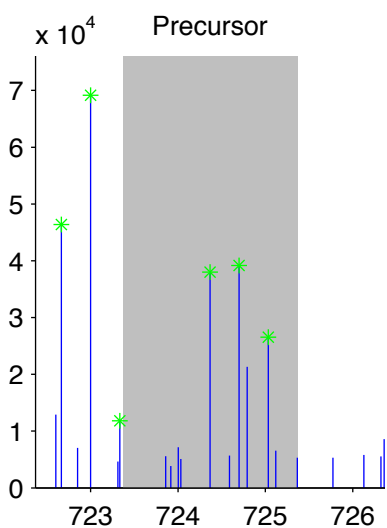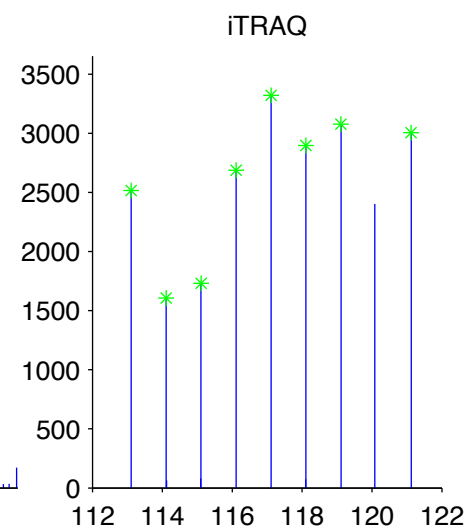

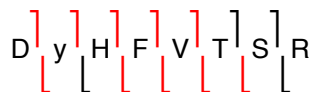

discs large homolog 1

Charge State: +3

Scan Number: 4059

File Name: 091130ptp1blivers\_hfd\_basal2.raw

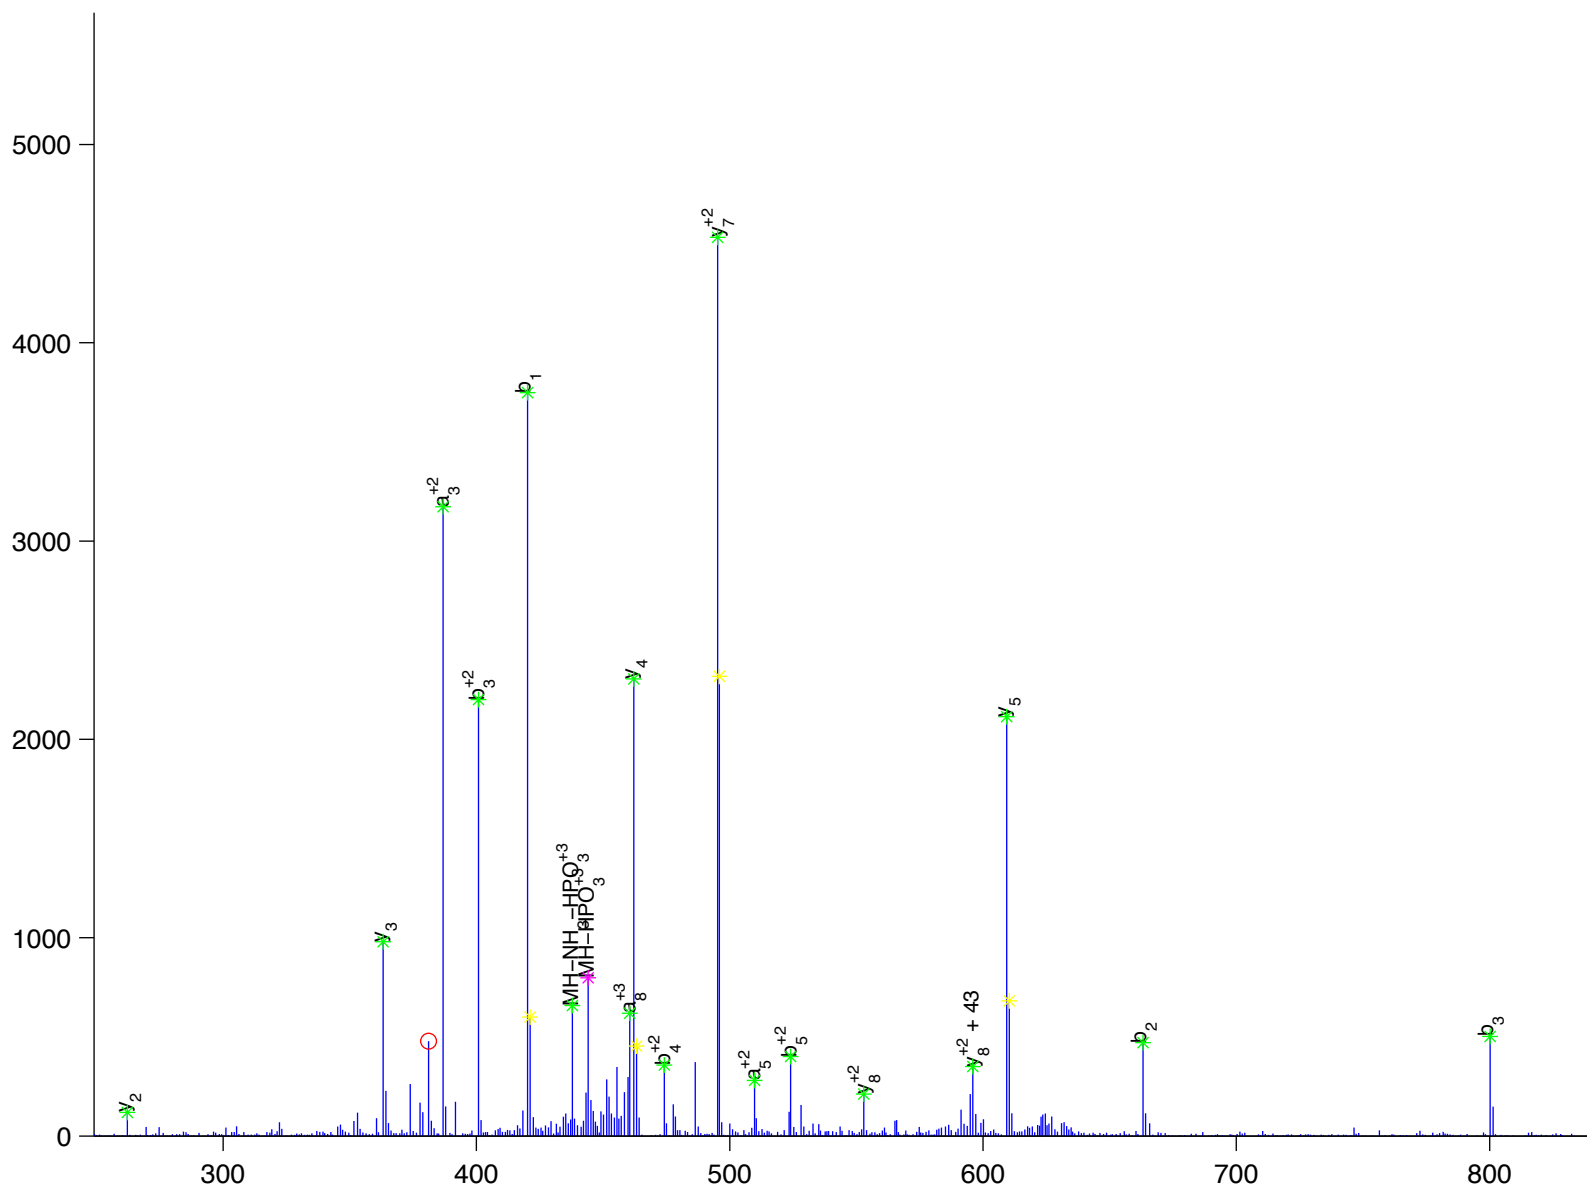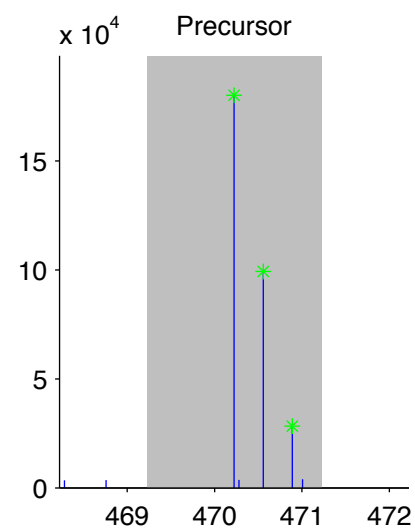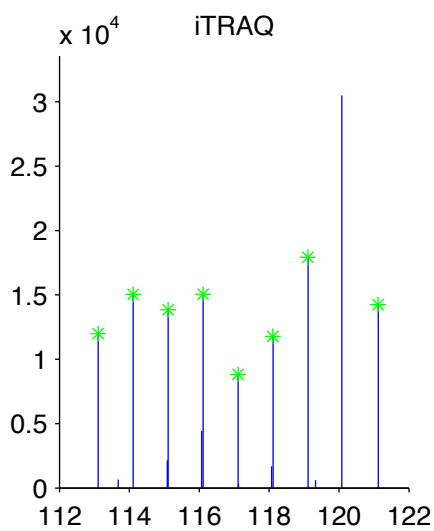

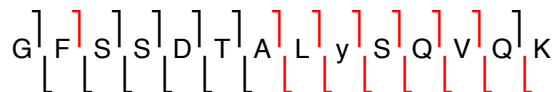

docking protein 1

Charge State: +3

Scan Number: 5378

File Name: 091130ptp1blivers\_hfd\_basal2.raw

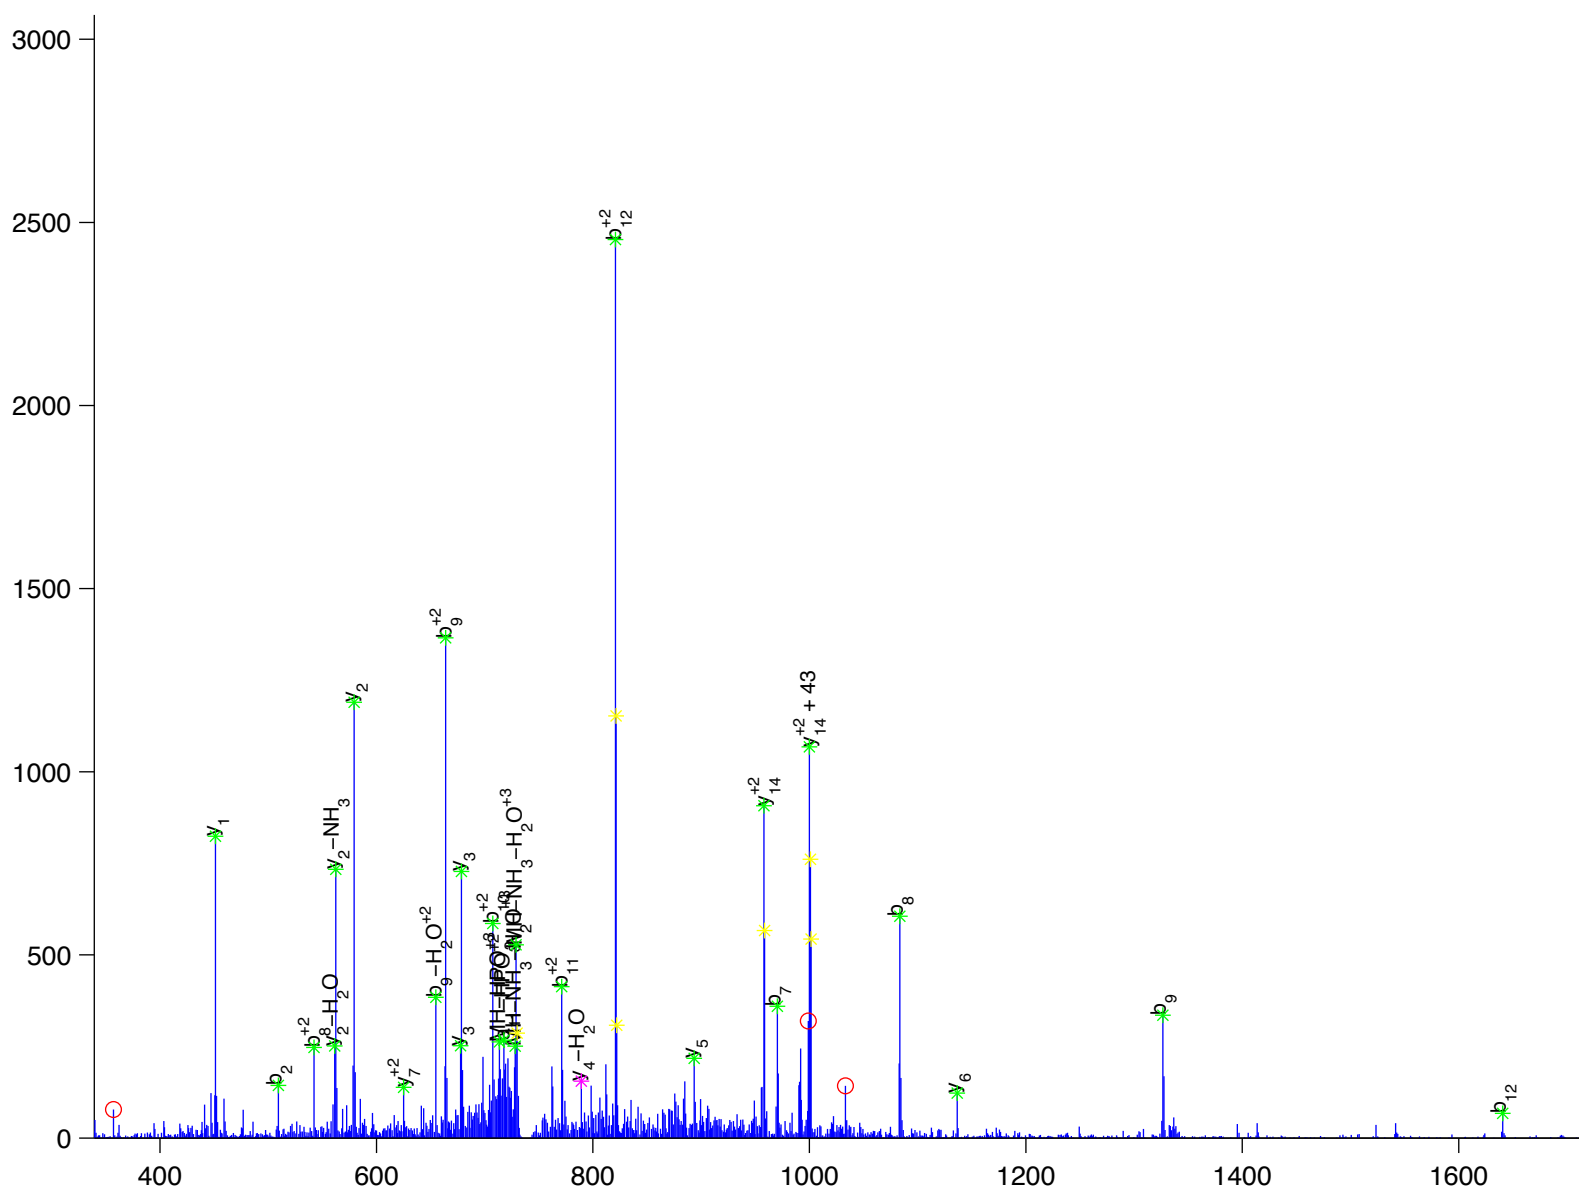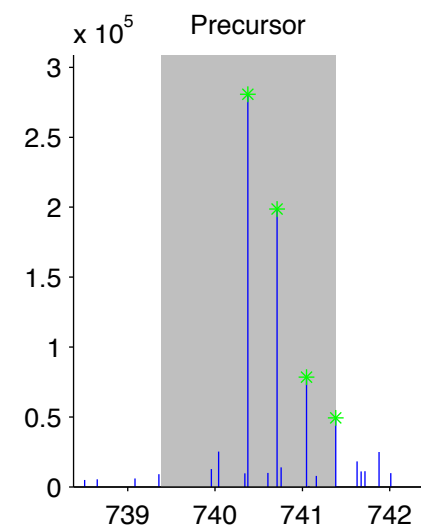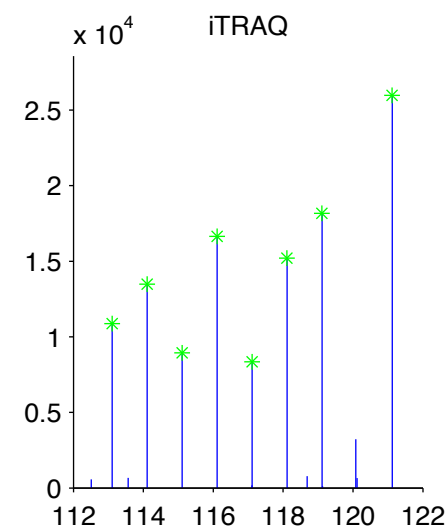

L [ T ] [ D ] [ S ] [ K ] [ E ] [ D ] [ P ] [ I ] [ y ] [ D ] [ E ] [ P ] [ E ] [ G ] [ L ] [ A ] [ P ] [ A ] [ P ] [ P ] [ R ]

docking protein 1

Charge State: +3

Scan Number: 5928

File Name: 091130ptp1blivers\_hfd\_basal2.raw

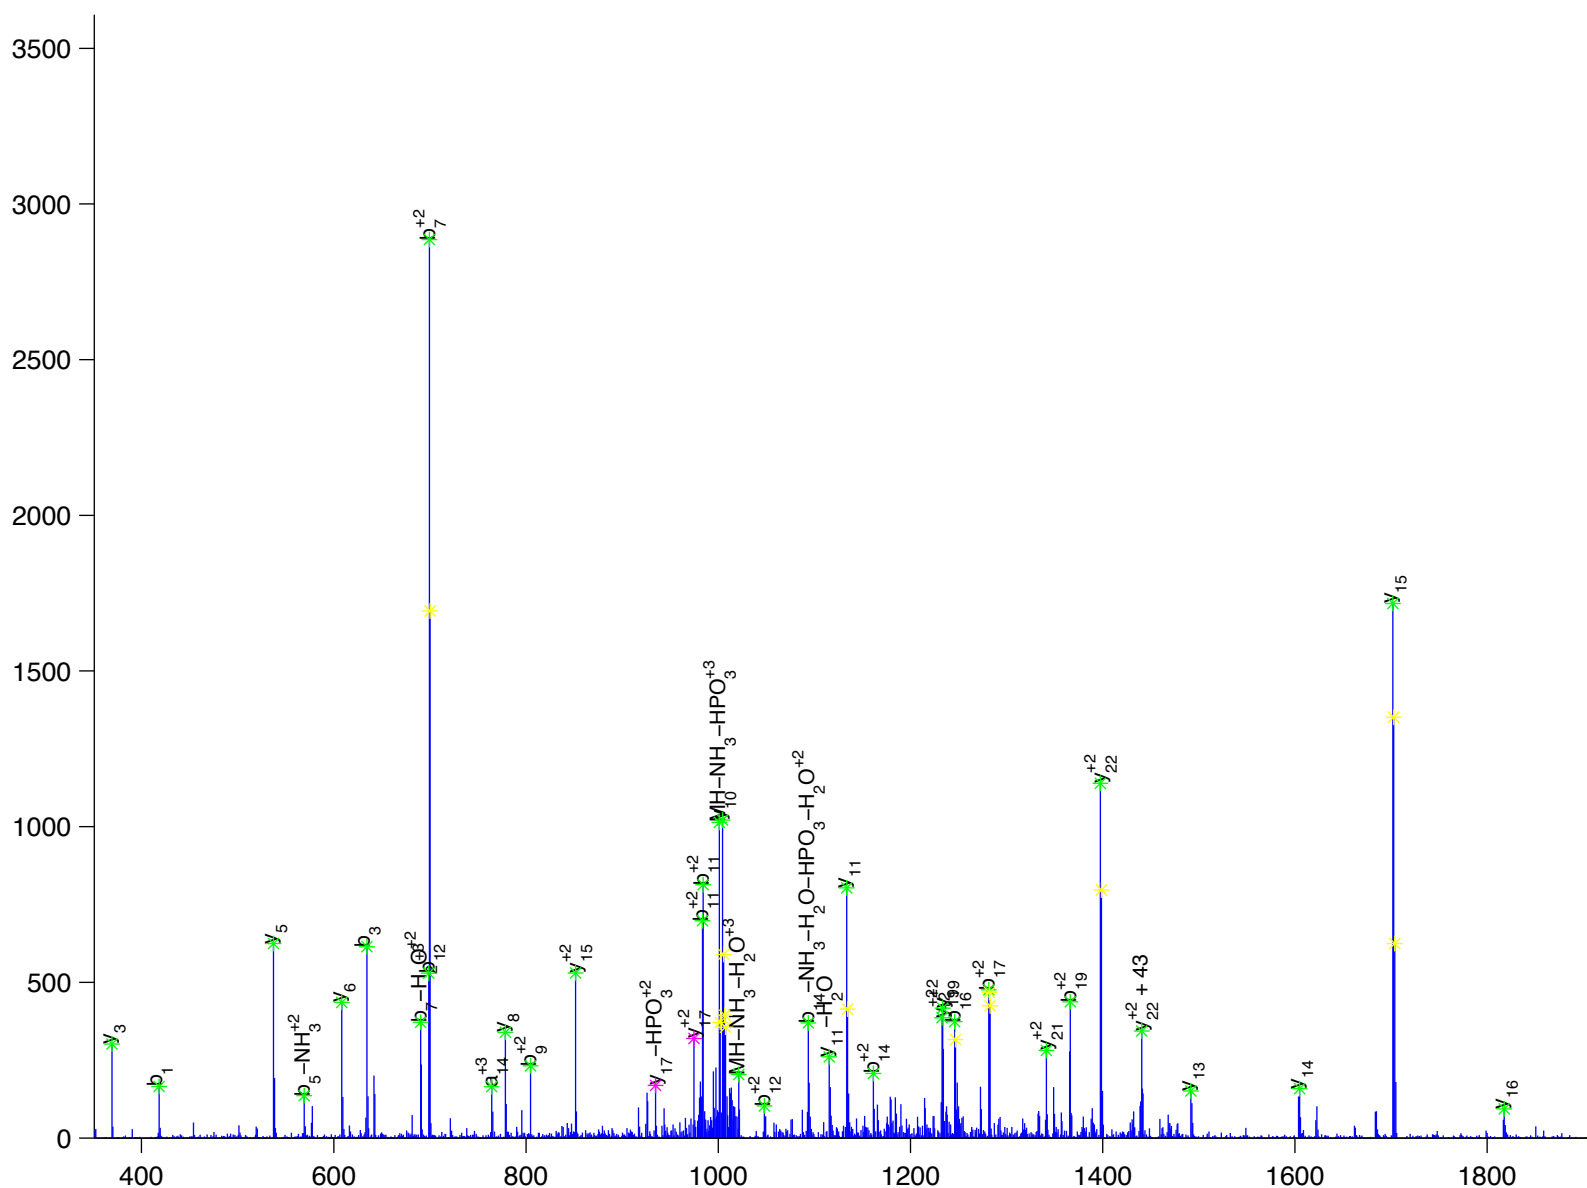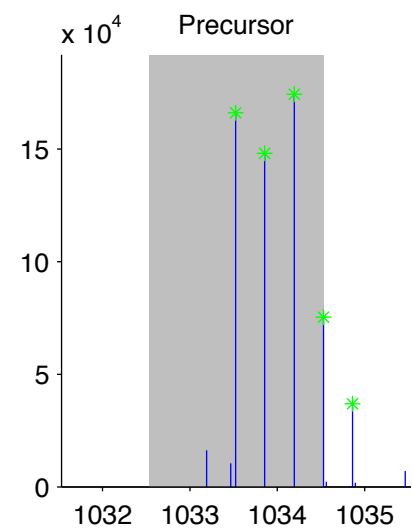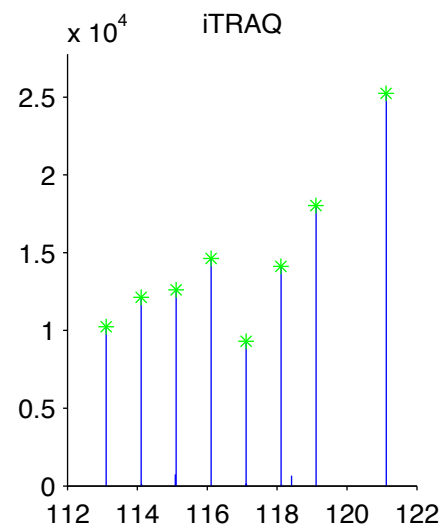

L [ K ] E [ E ] G [ Y ] E [ L ] P [ Y ] N [ P ] A [ T ] D [ D ] y [ A ] V [ P ] P [ P ] R

docking protein 1

Charge State: +4

Scan Number: 6341

File Name: 091130ptp1blivers\_hfd\_basal2.raw

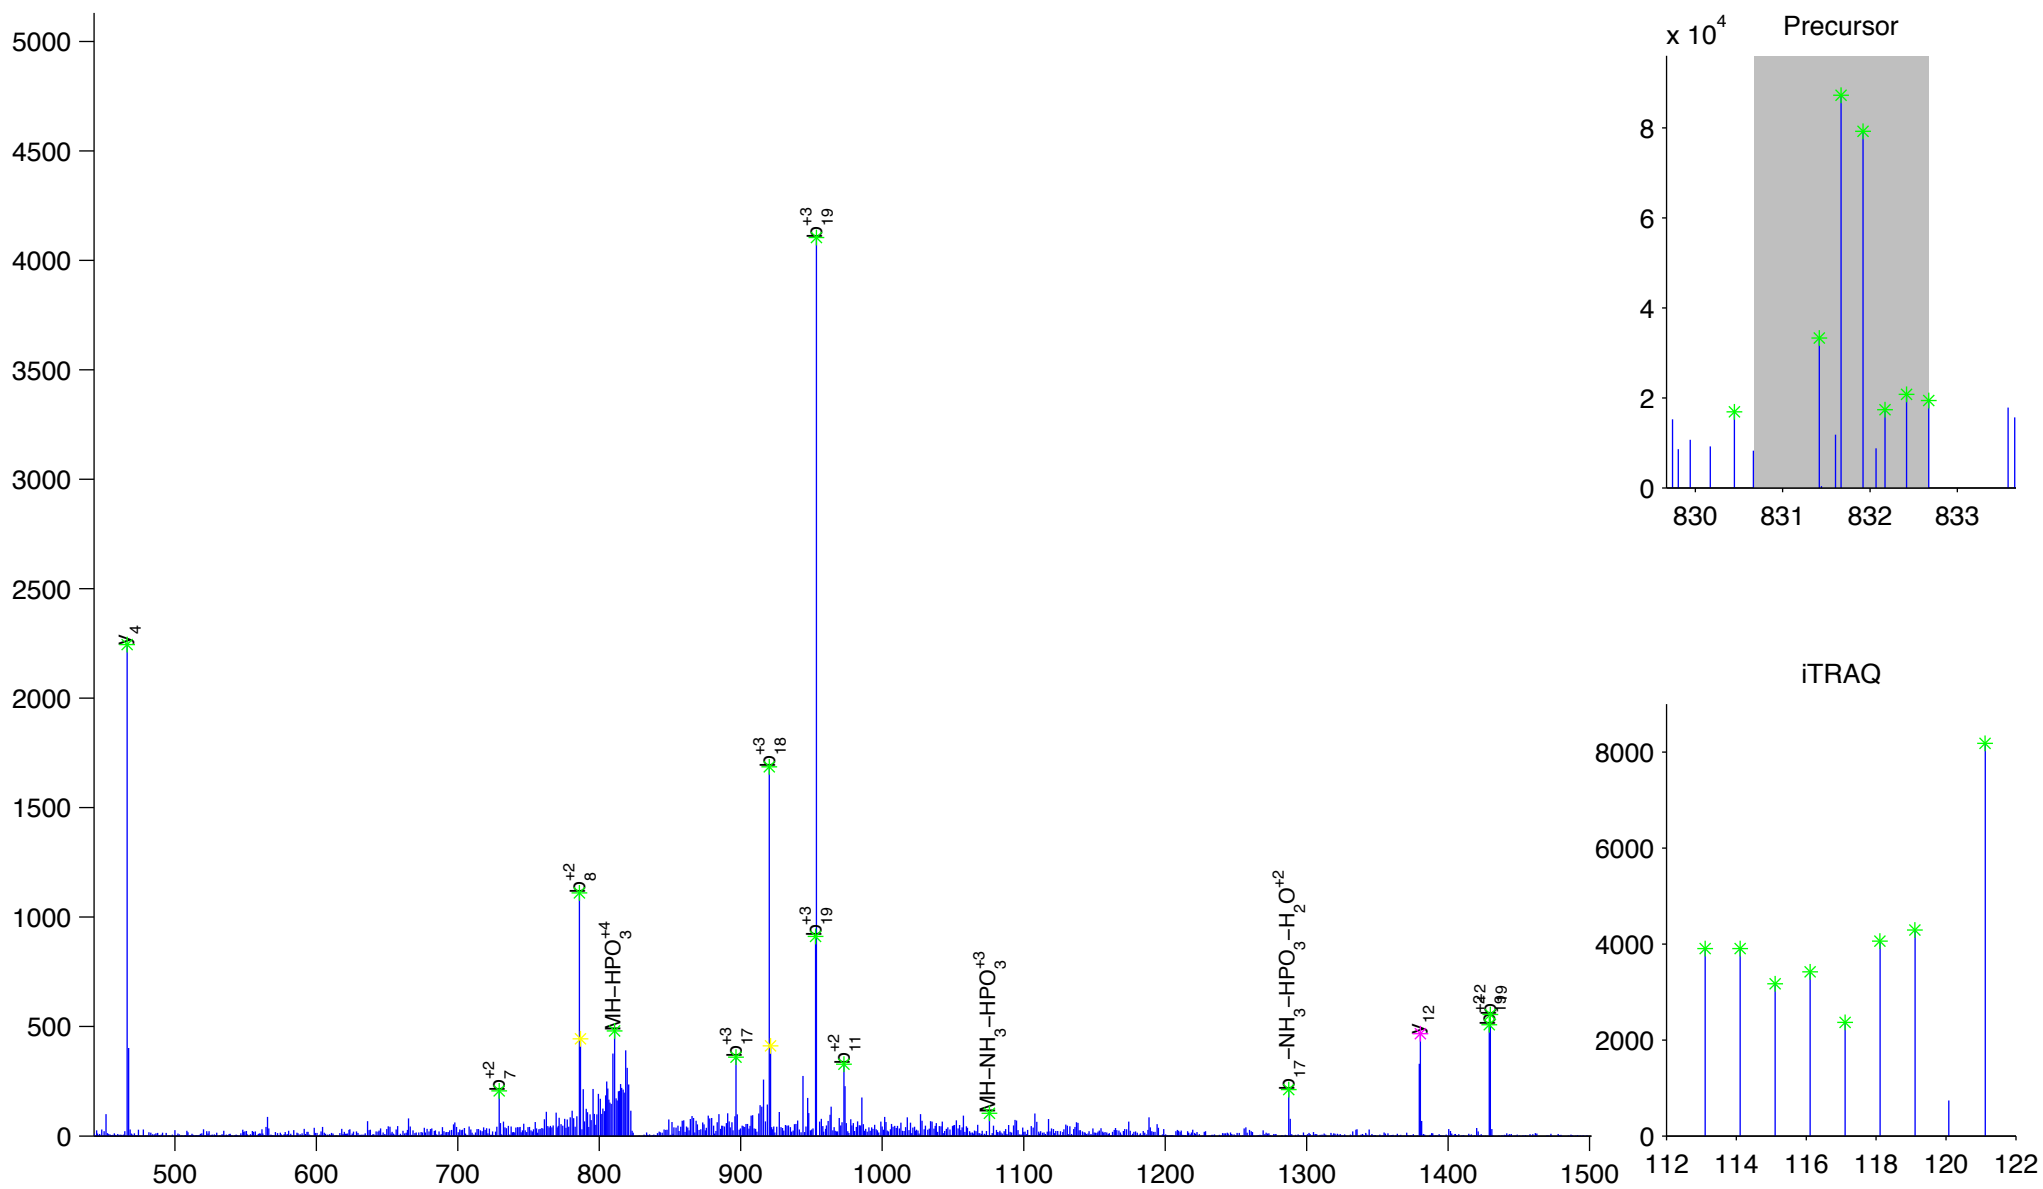

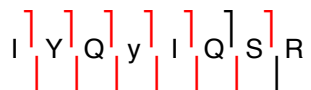

dual-specificity tyrosine-(Y)-phosphorylation regulated kinase 1b isoform a

Charge State: +3

Scan Number: 981

File Name: HJ072909\_HFD\_E1\_2.raw

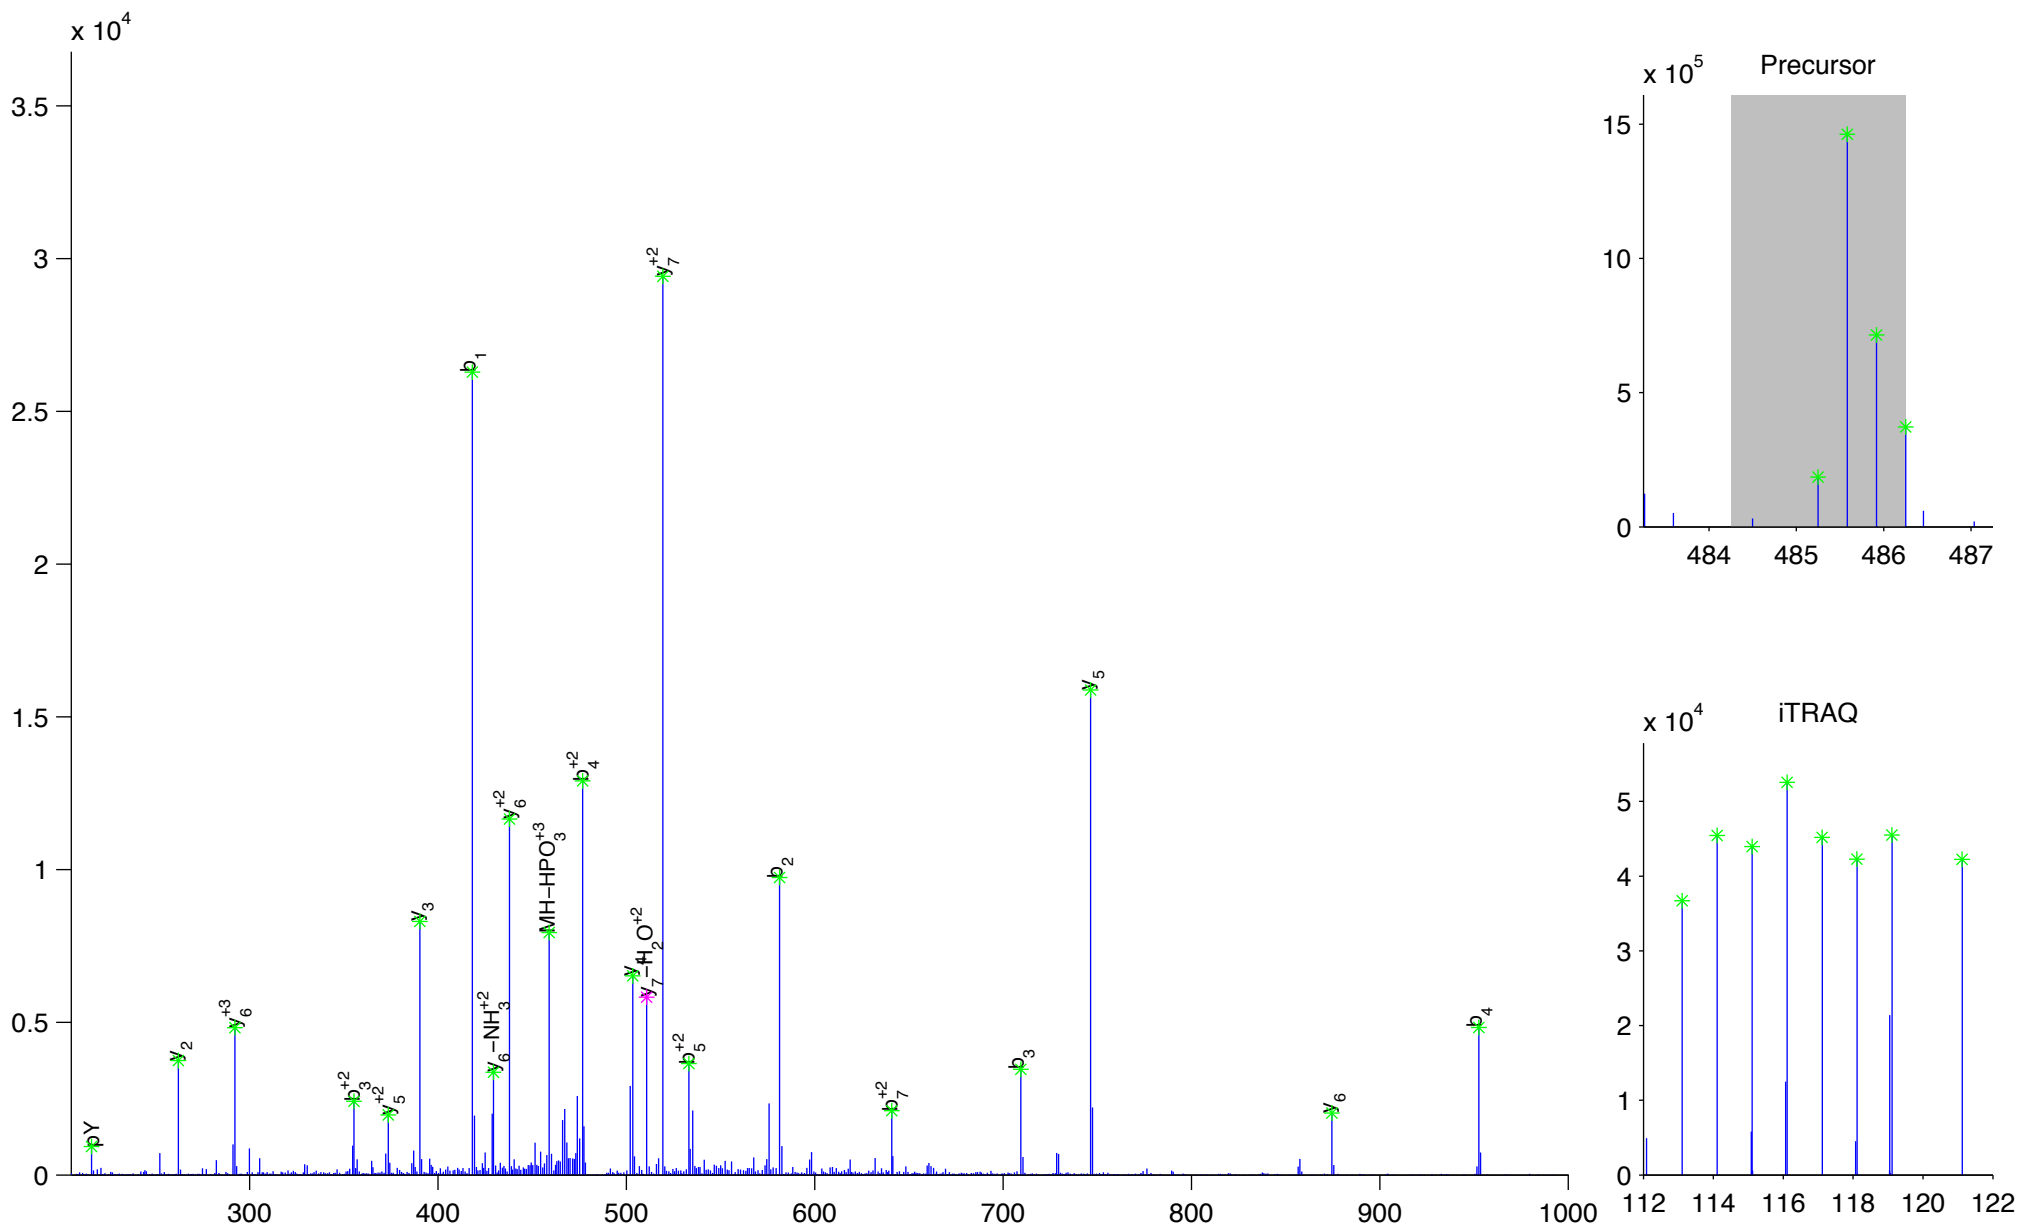

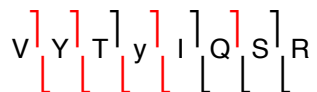

dual-specificity tyrosine-(Y)-phosphorylation regulated kinase 4

Charge State: +2

Scan Number: 5336

File Name: 091130ptp1blivers\_hfd\_basal2.raw

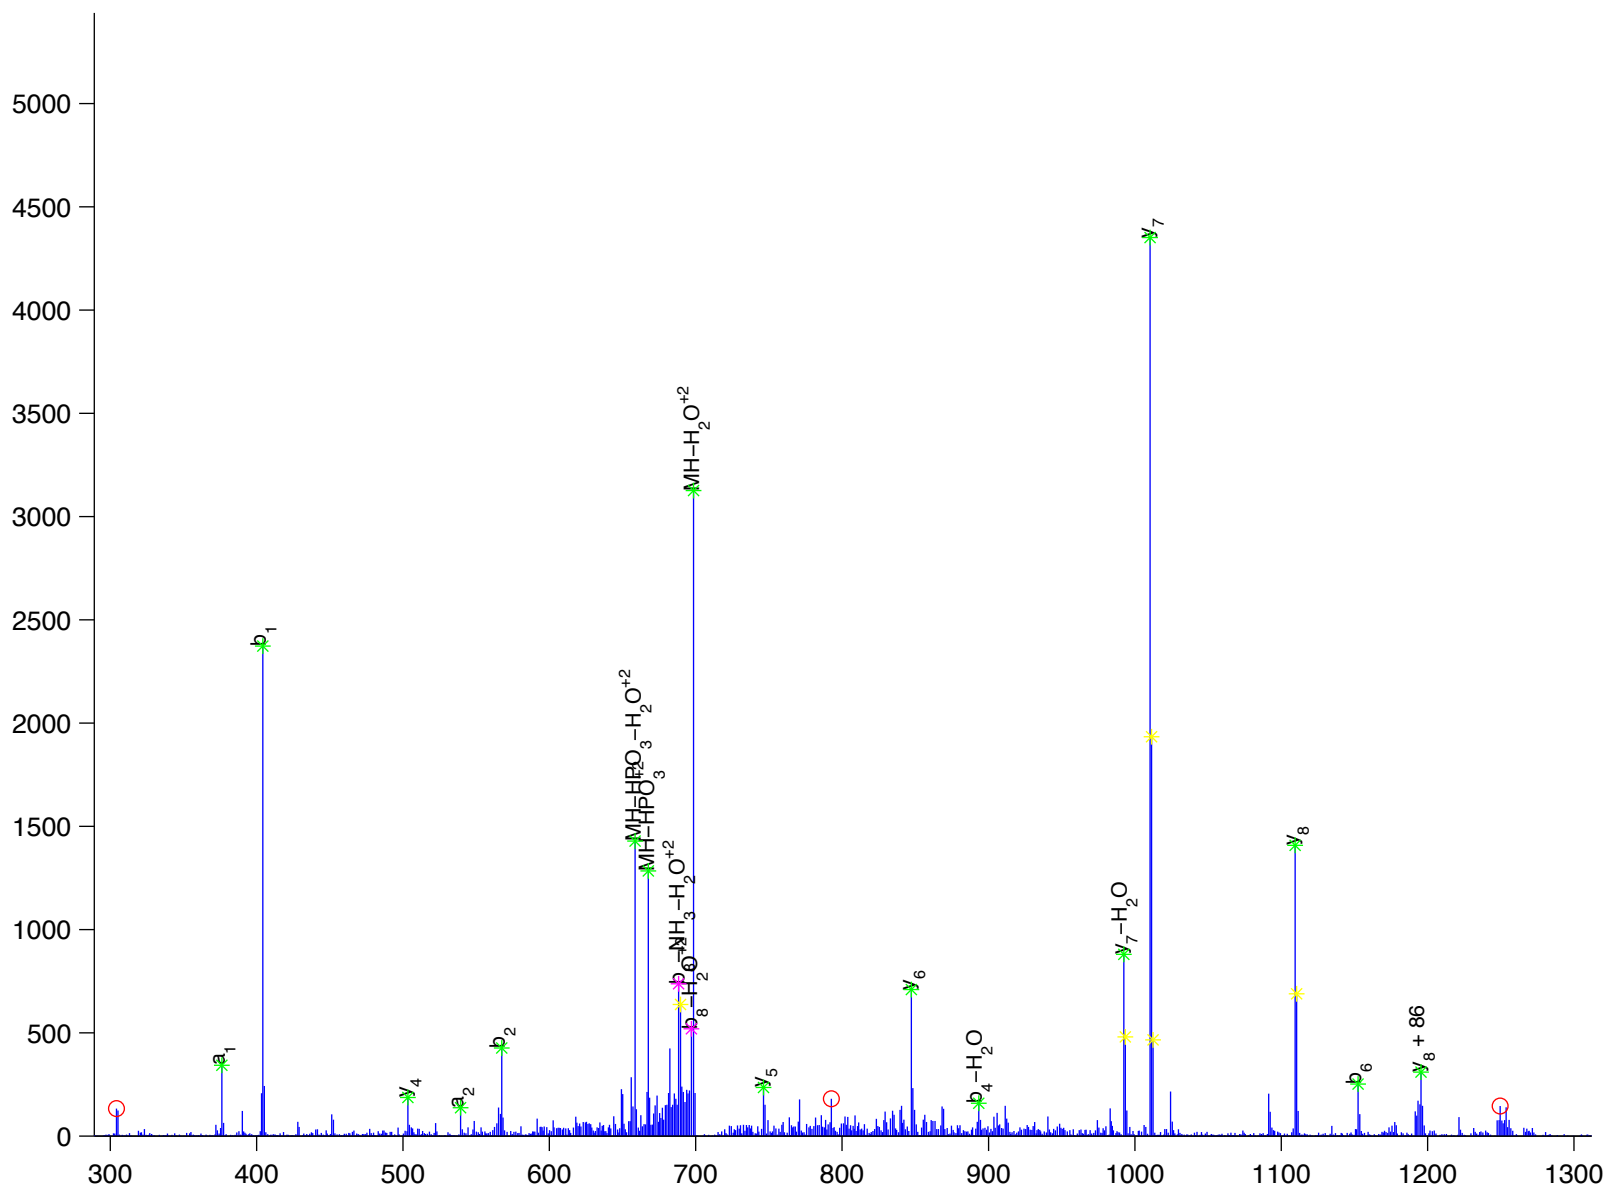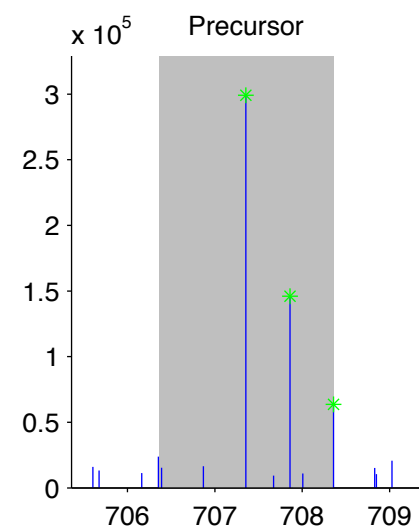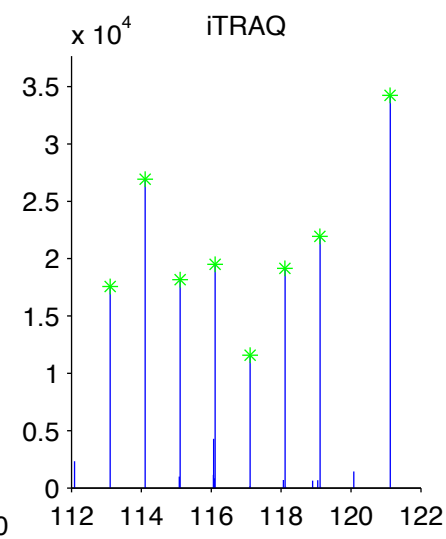



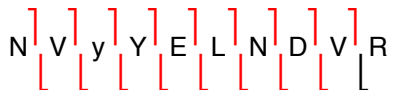

enhancer trap locus 4

Charge State: +2

Scan Number: 5527

File Name: 090806ptp1blivers\_M\_NC2.raw

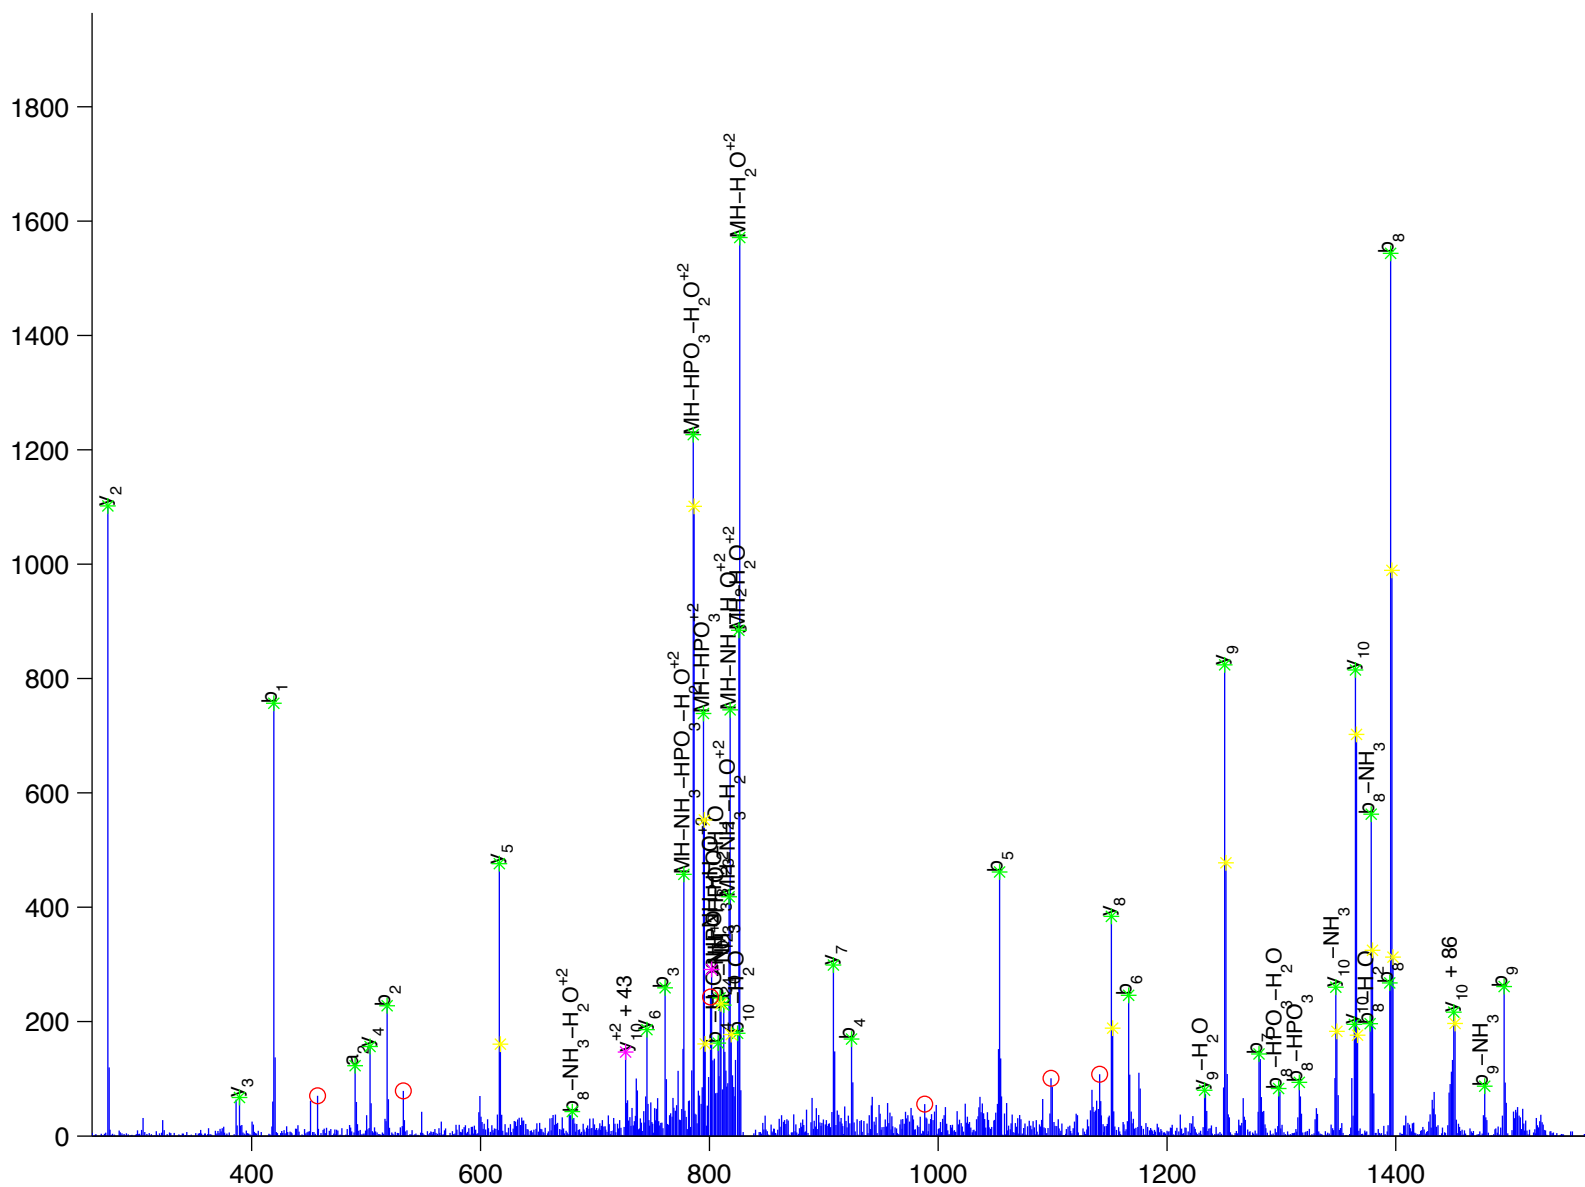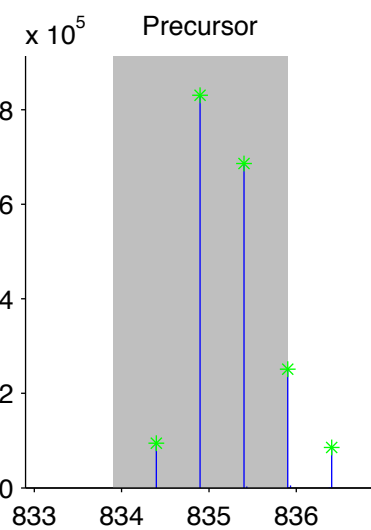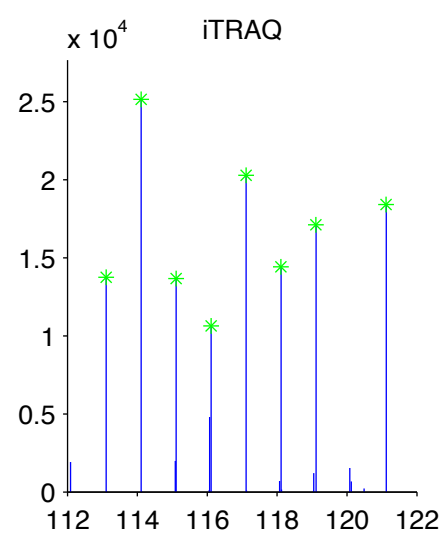

G[N]P[T]V[E]V[D]L[y]T[A]K

enolase 2, gamma neuronal

Charge State: +3

Scan Number: 4995

File Name: 100611ptp1blivers\_nc\_basal.raw

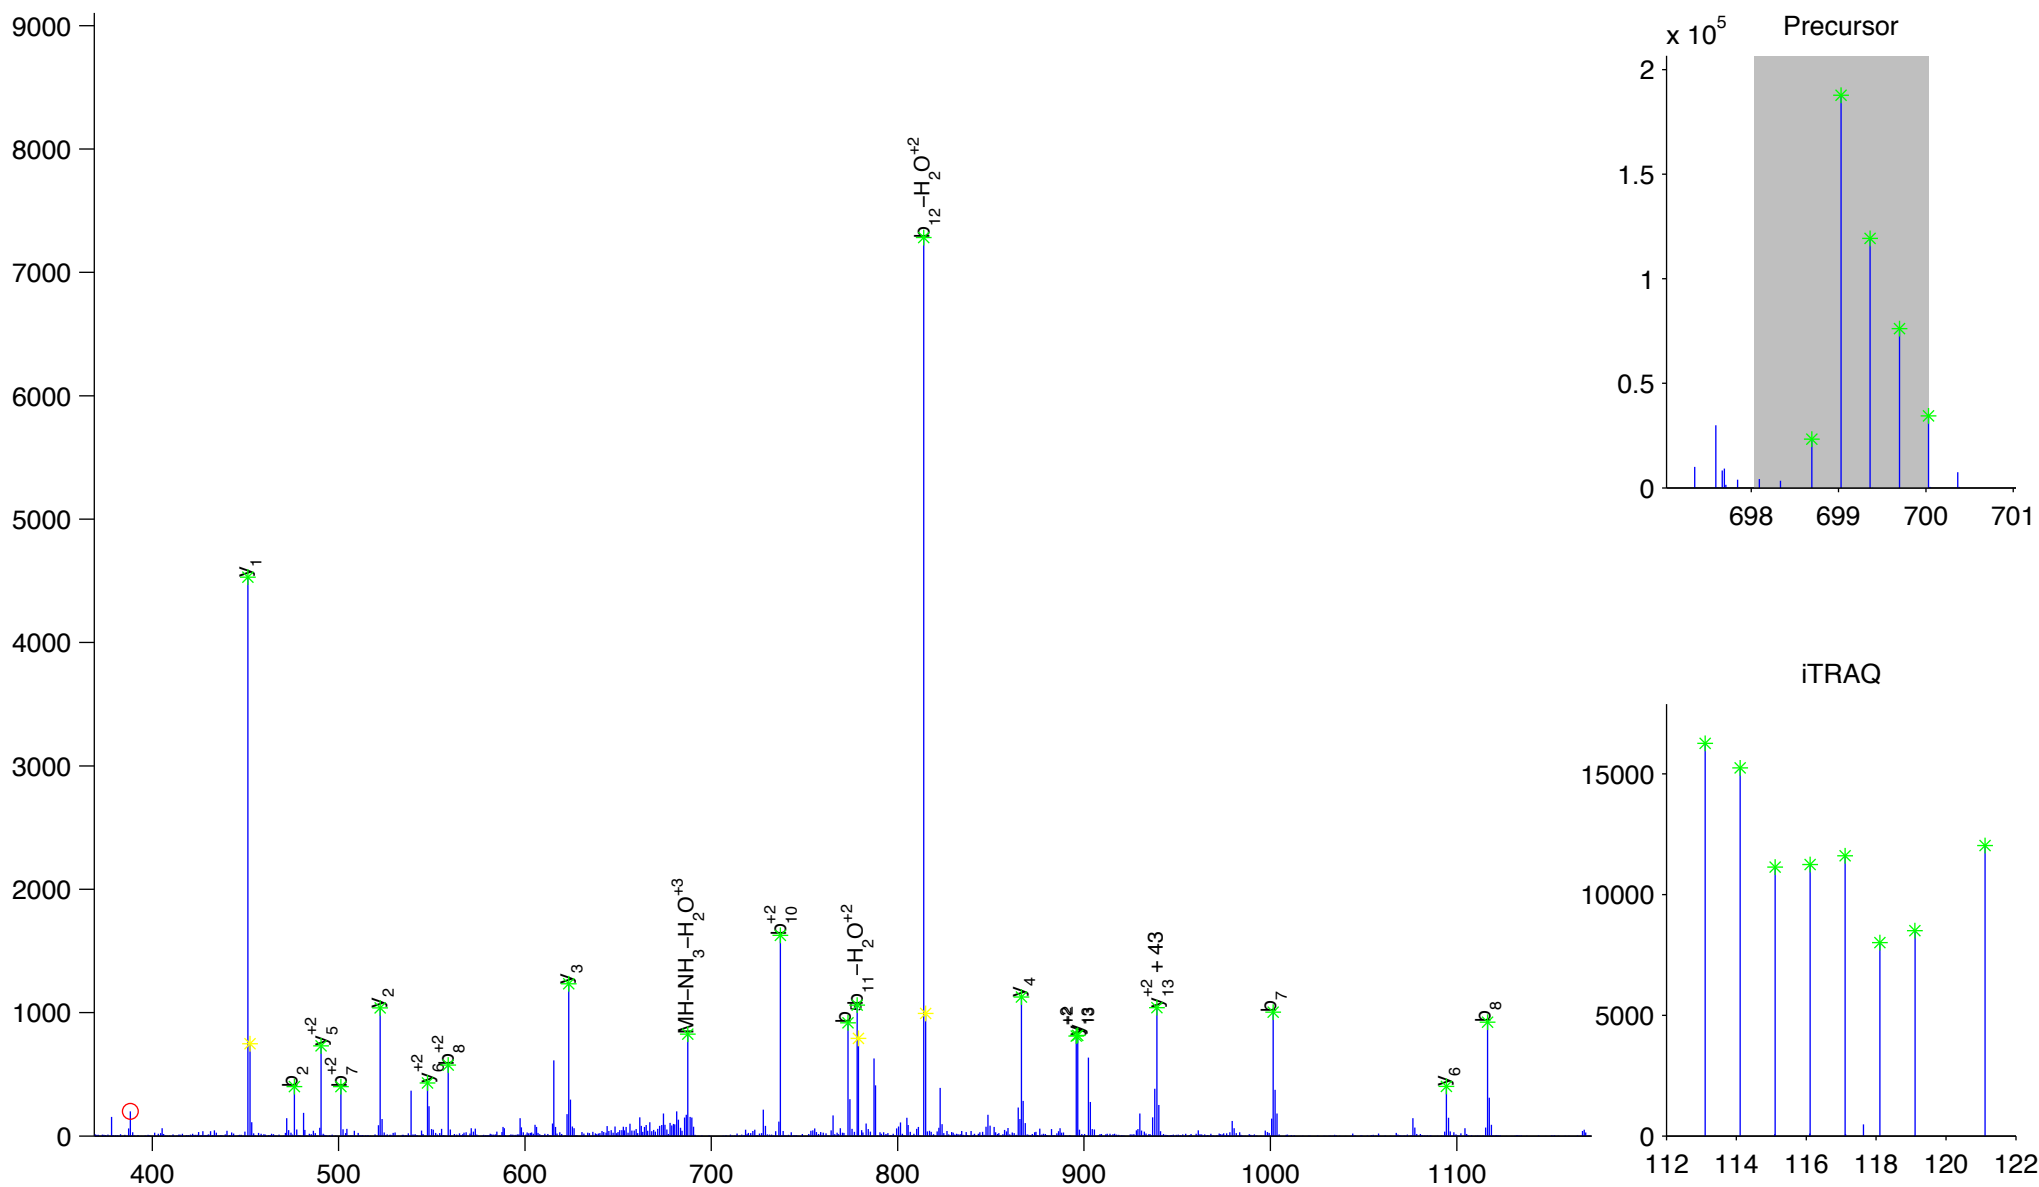

A [ A ] [ V ] [ P ] [ S ] [ G ] [ A ] [ S ] [ T ] [ G ] [ I ] [ y ] [ E ] [ A ] [ L ] [ E ] [ L ] [ R ]

enolase 3, beta muscle

Charge State: +3

Scan Number: 8611

File Name: 090806ptp1blivers\_M\_NC2.raw

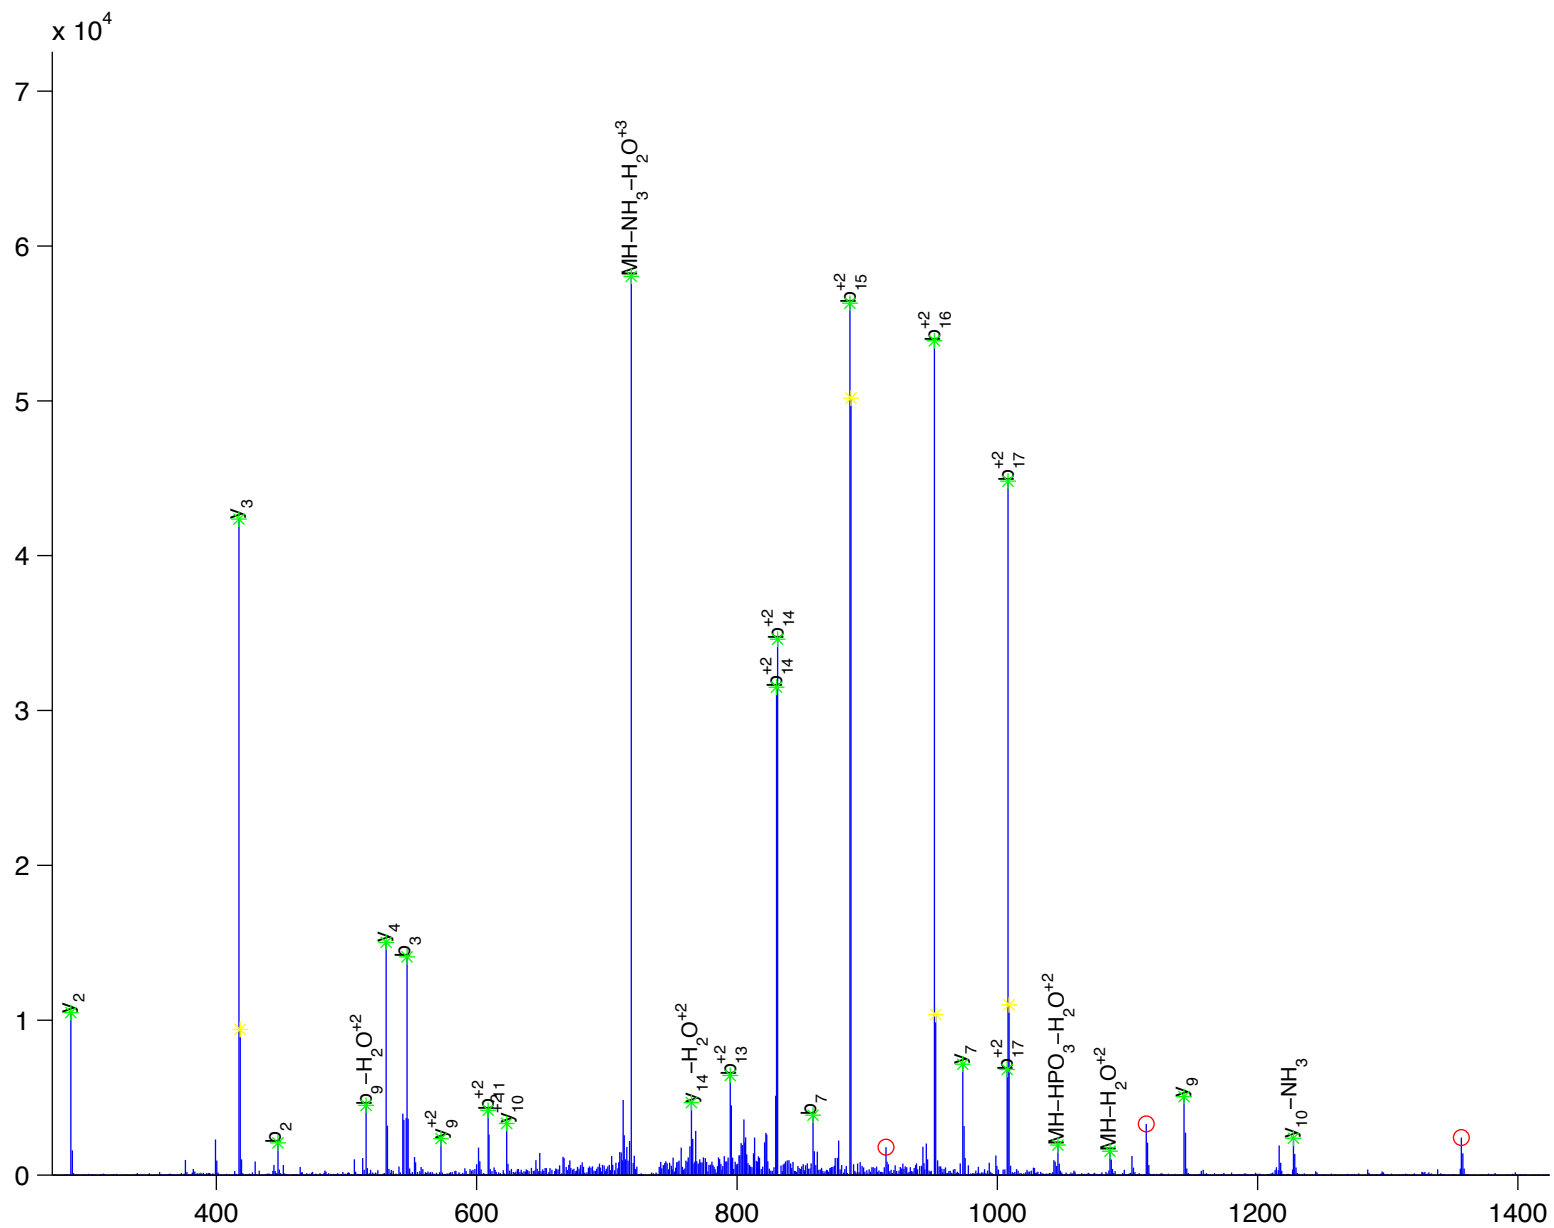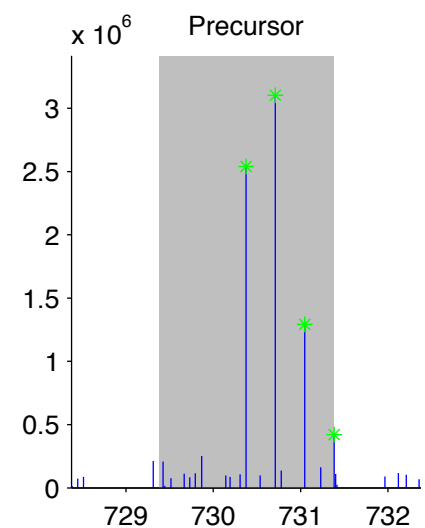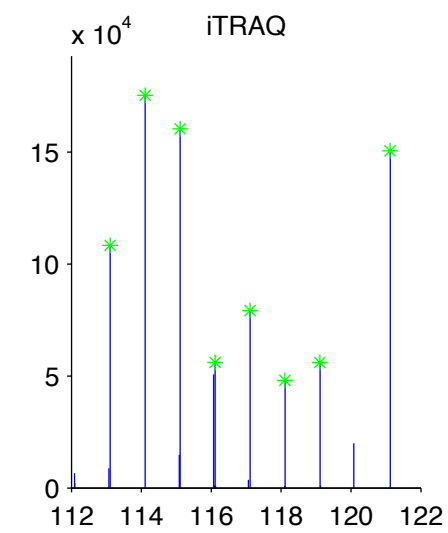

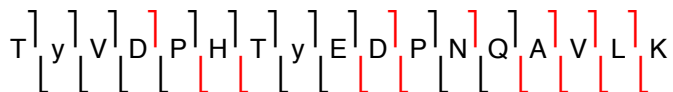

Eph receptor A2

Charge State: +3

Scan Number: 4905

File Name: 091130ptp1blivers\_hfd\_basal2.raw

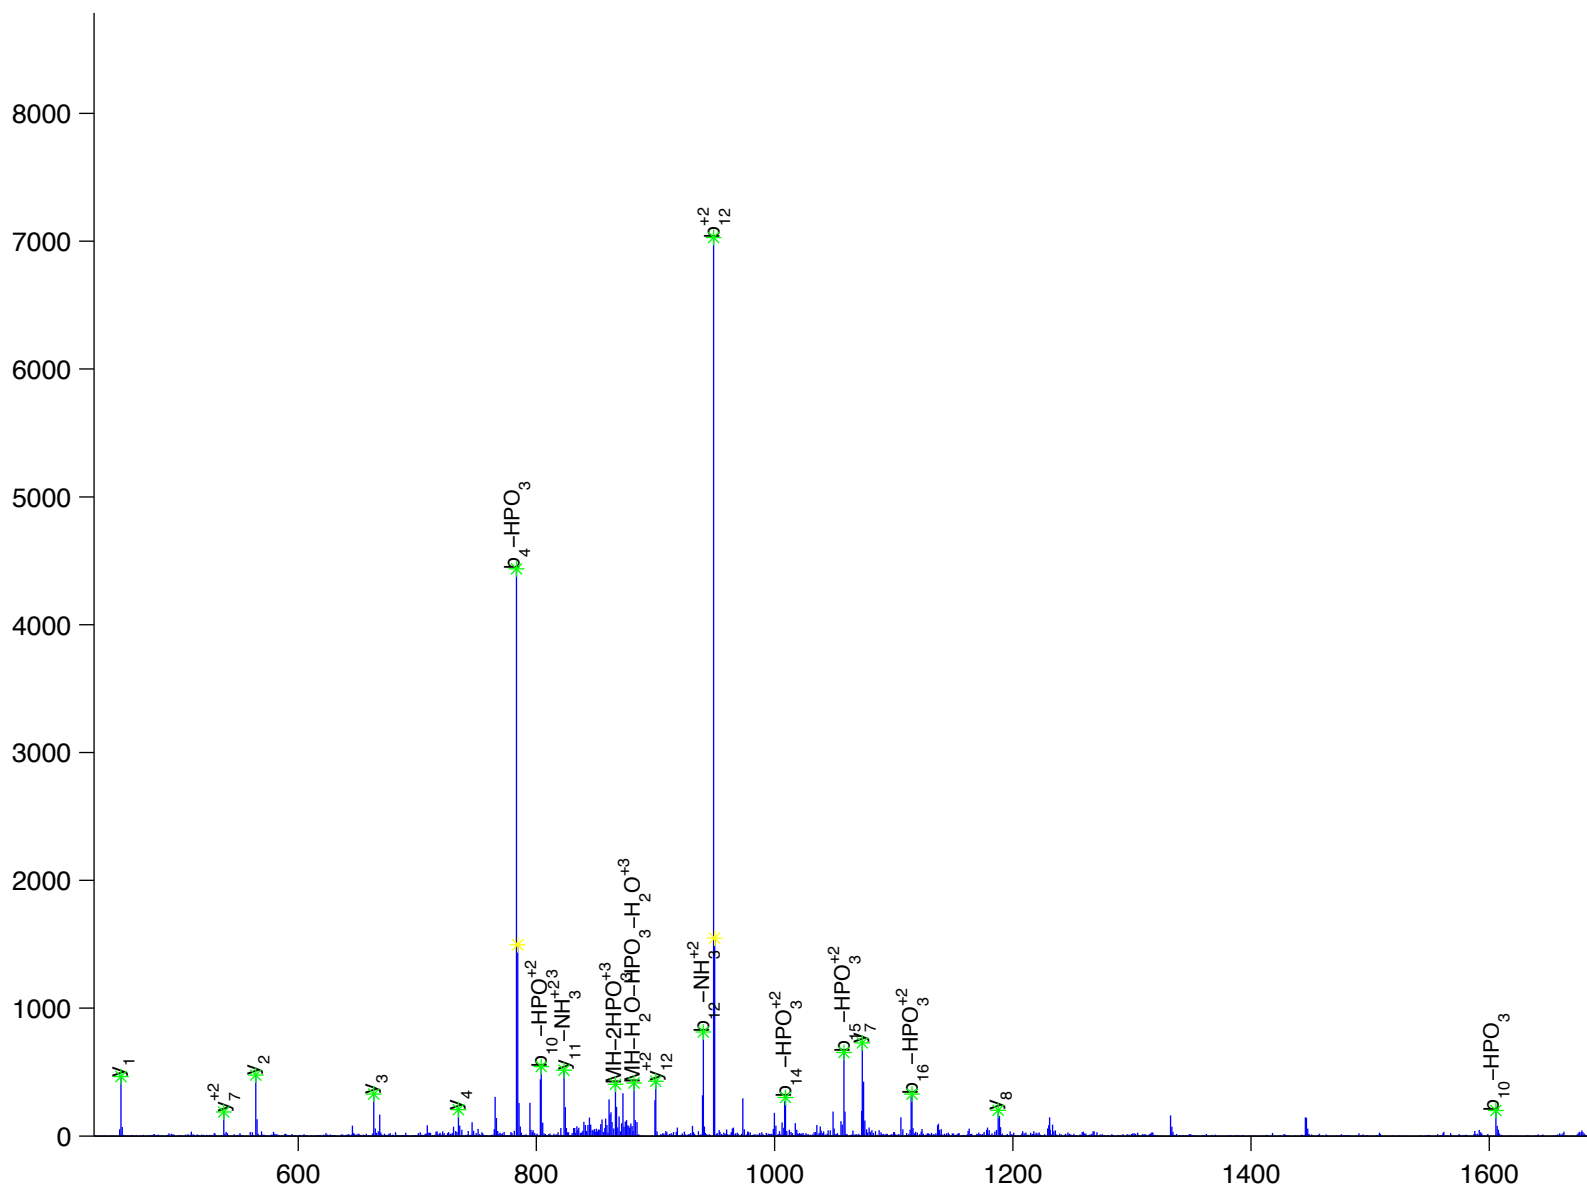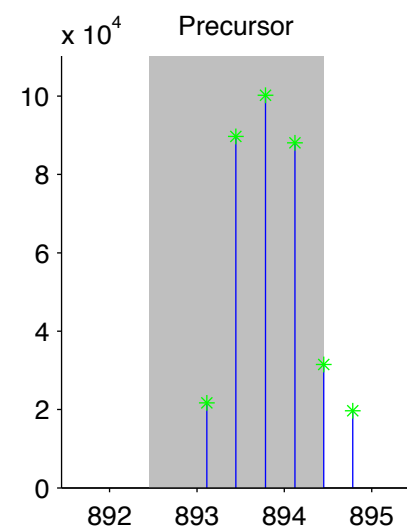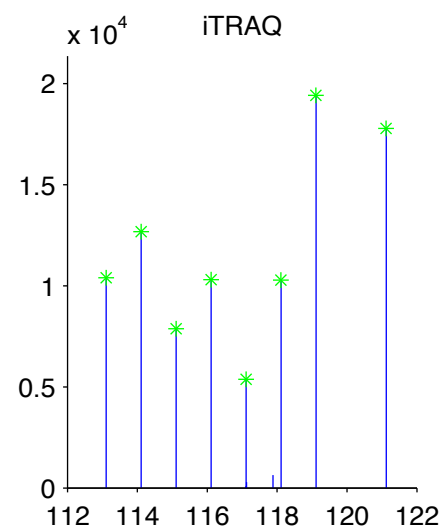

V L E D D P E A T y T T S G G K

Eph receptor A2

Charge State: +3

Scan Number: 5231

File Name: 091130ptp1blivers\_hfd\_basal2.raw

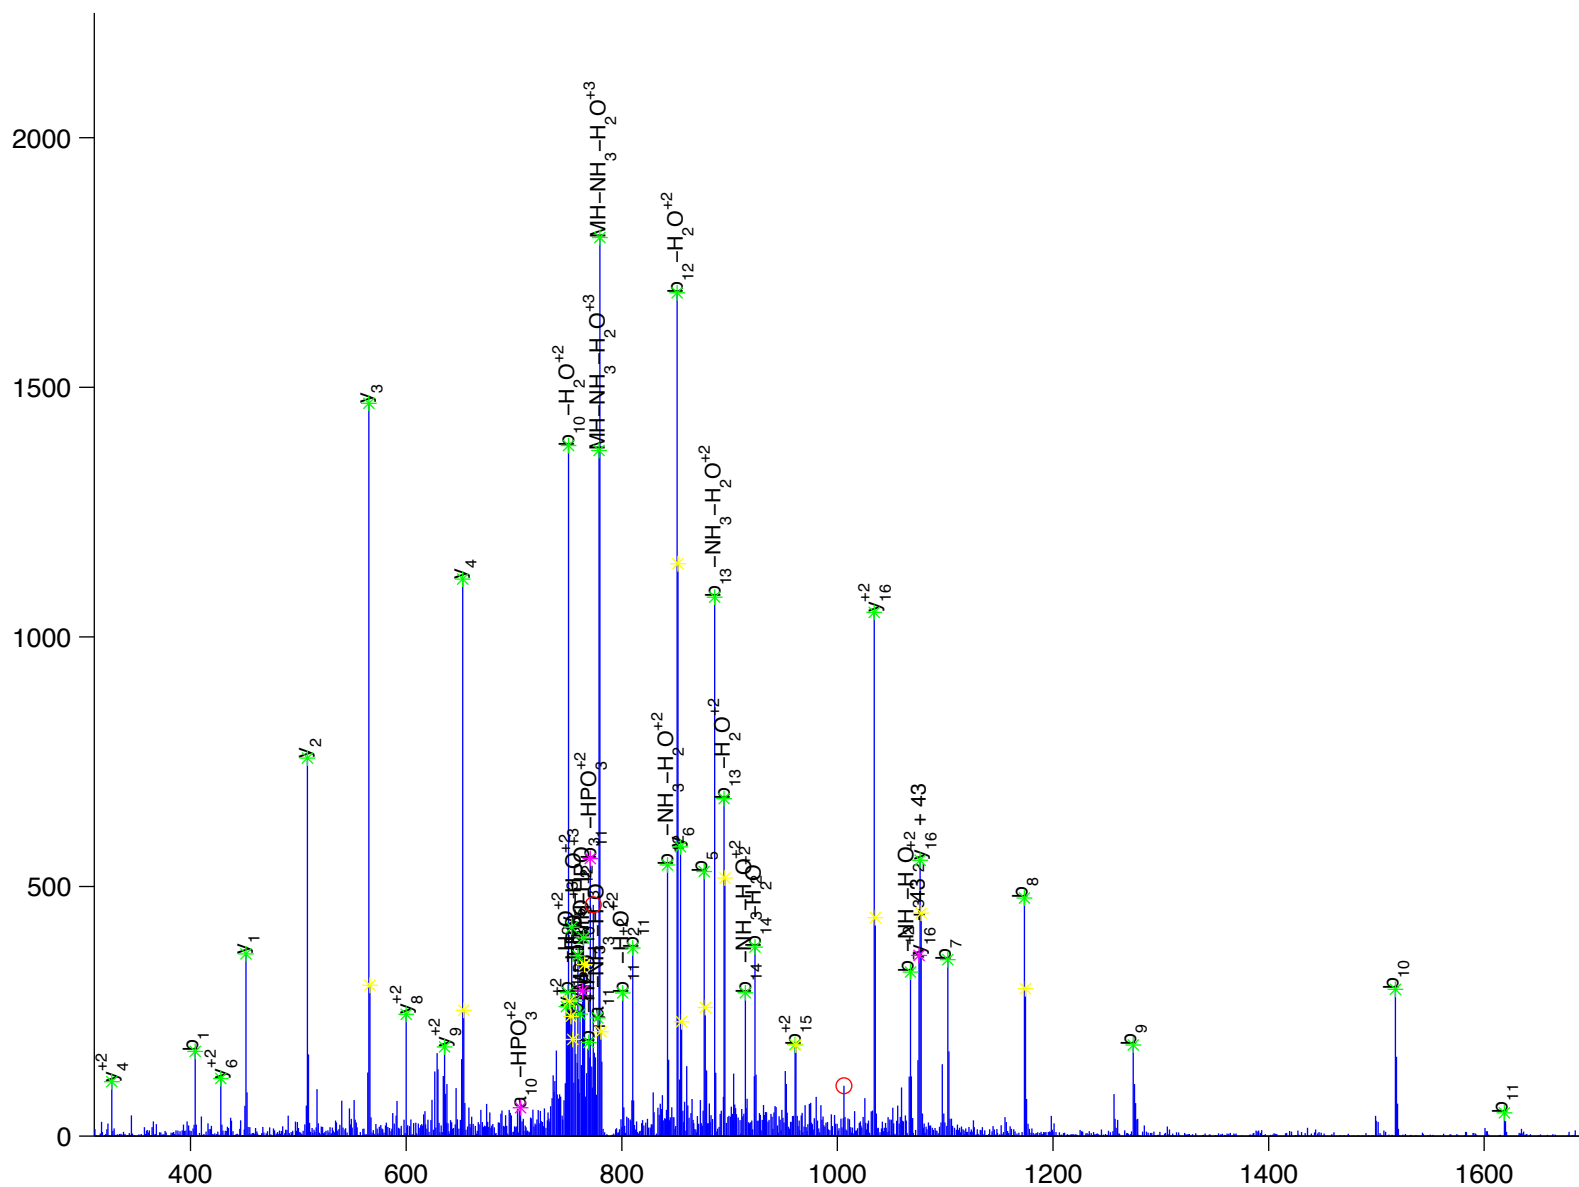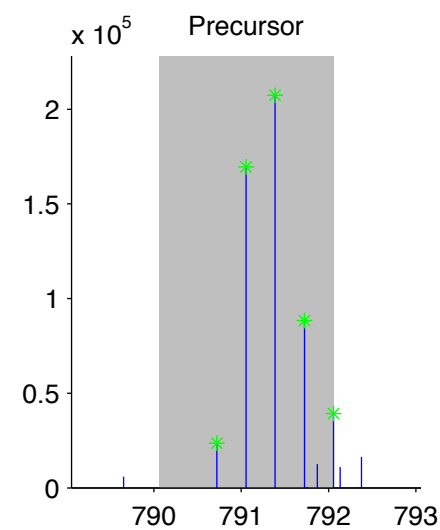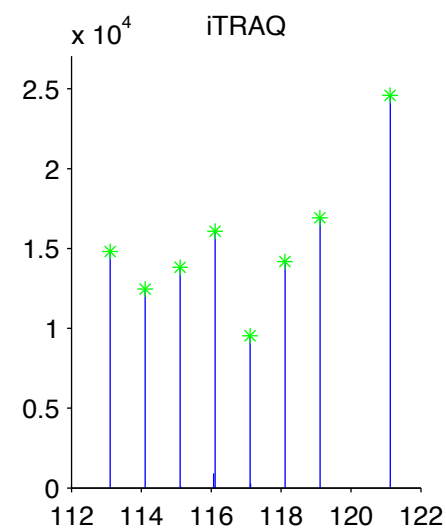

F L E E N S S D P T y T S S L G G K

Eph receptor B4

Charge State: +3

Scan Number: 6436

File Name: 091130ptp1blivers\_hfd\_basal2.raw

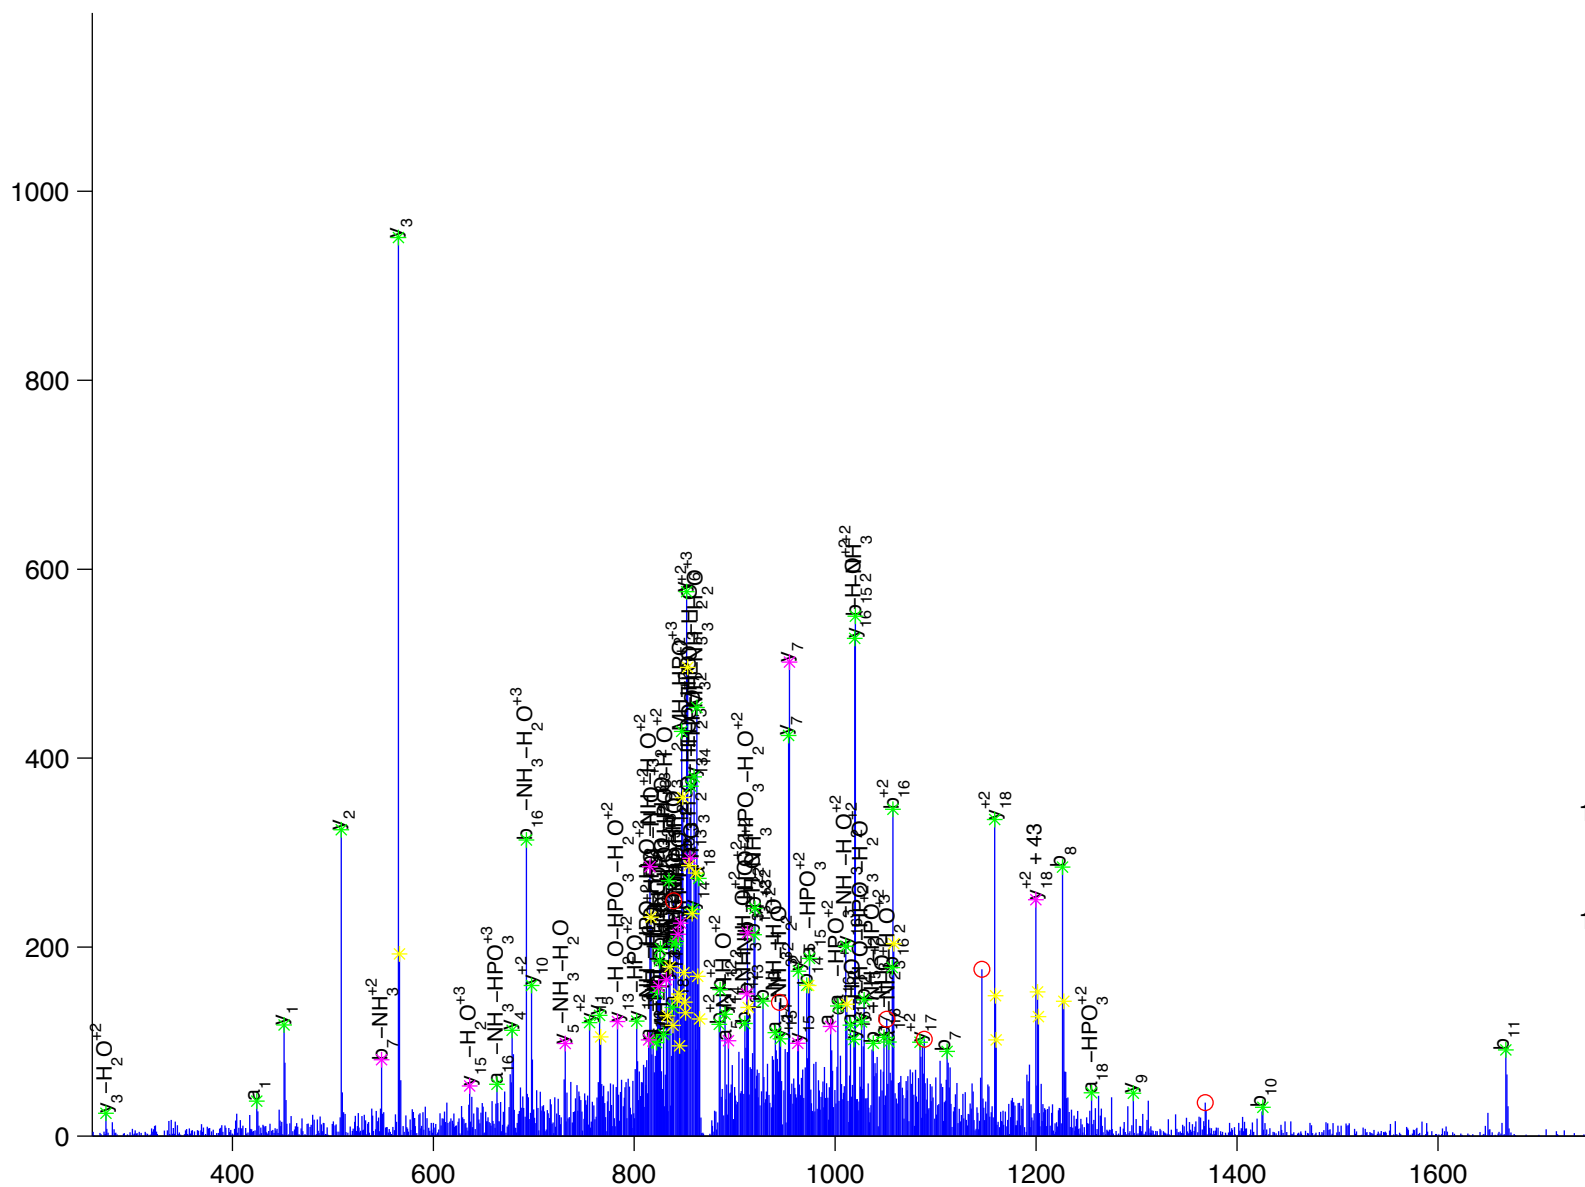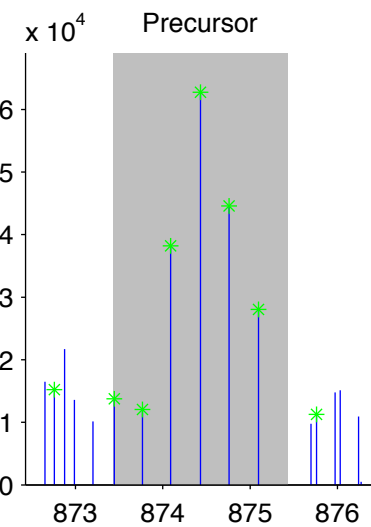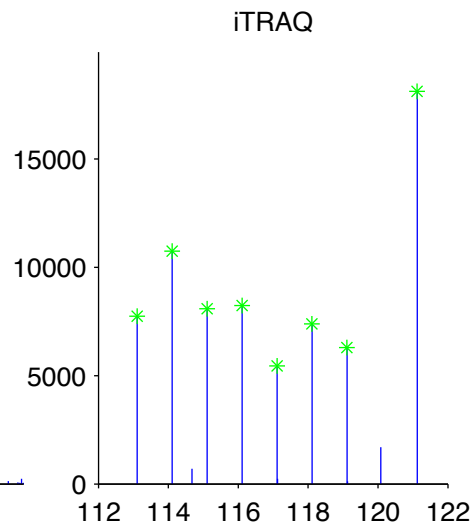

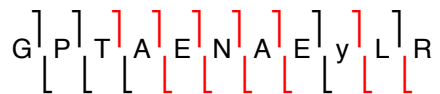

epidermal growth factor receptor isoform 1

Charge State: +3

Scan Number: 4290

File Name: 091130ptp1blivers\_hfd\_basal2.raw

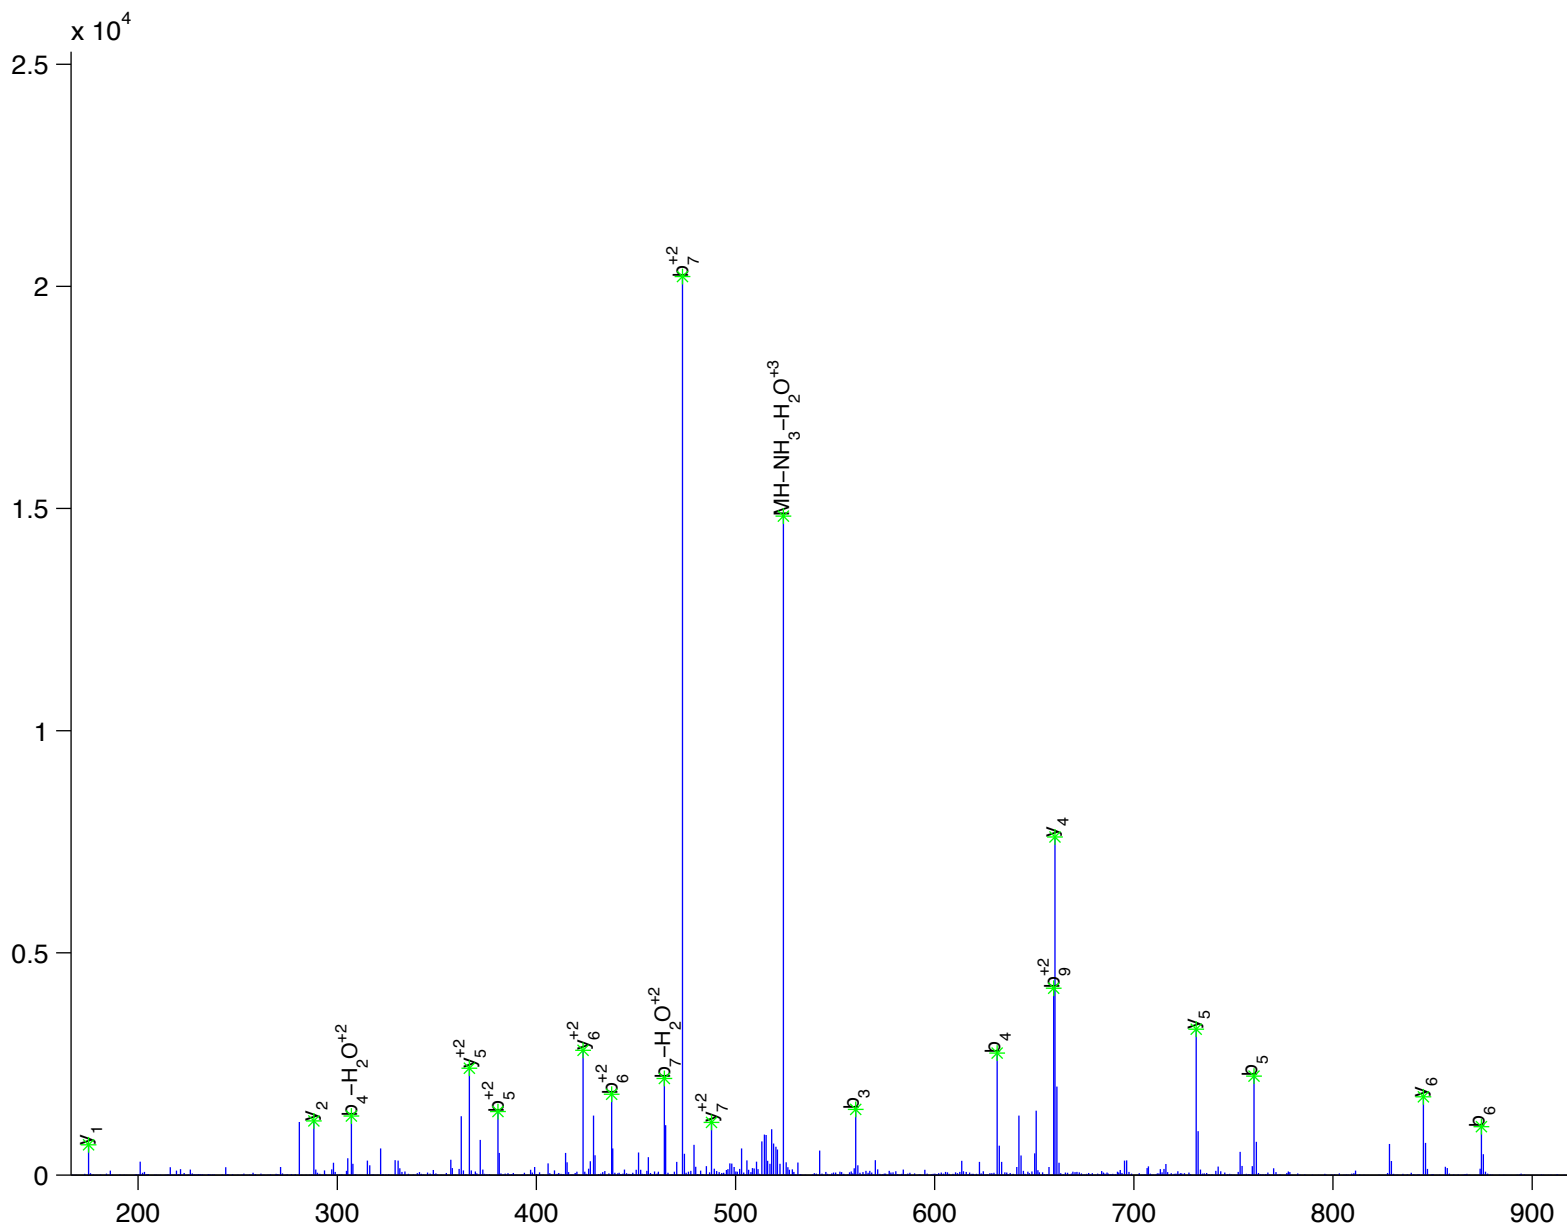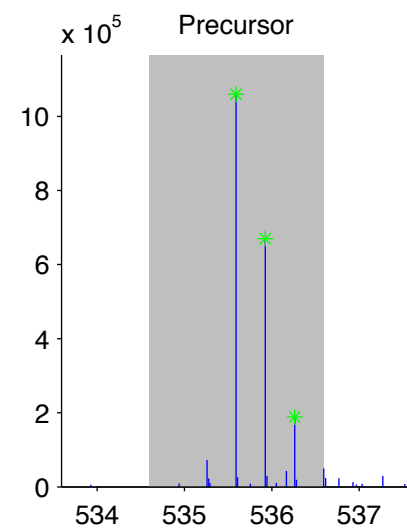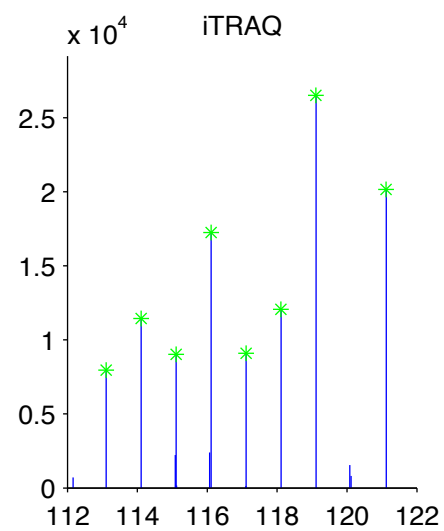

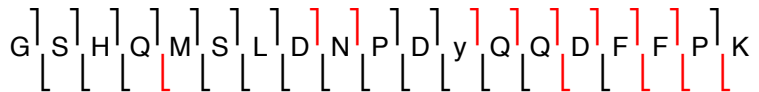

epidermal growth factor receptor isoform 1

Charge State: +4

Scan Number: 5376

File Name: 090728ptp1blivers\_M\_NC\_ins\_e.raw

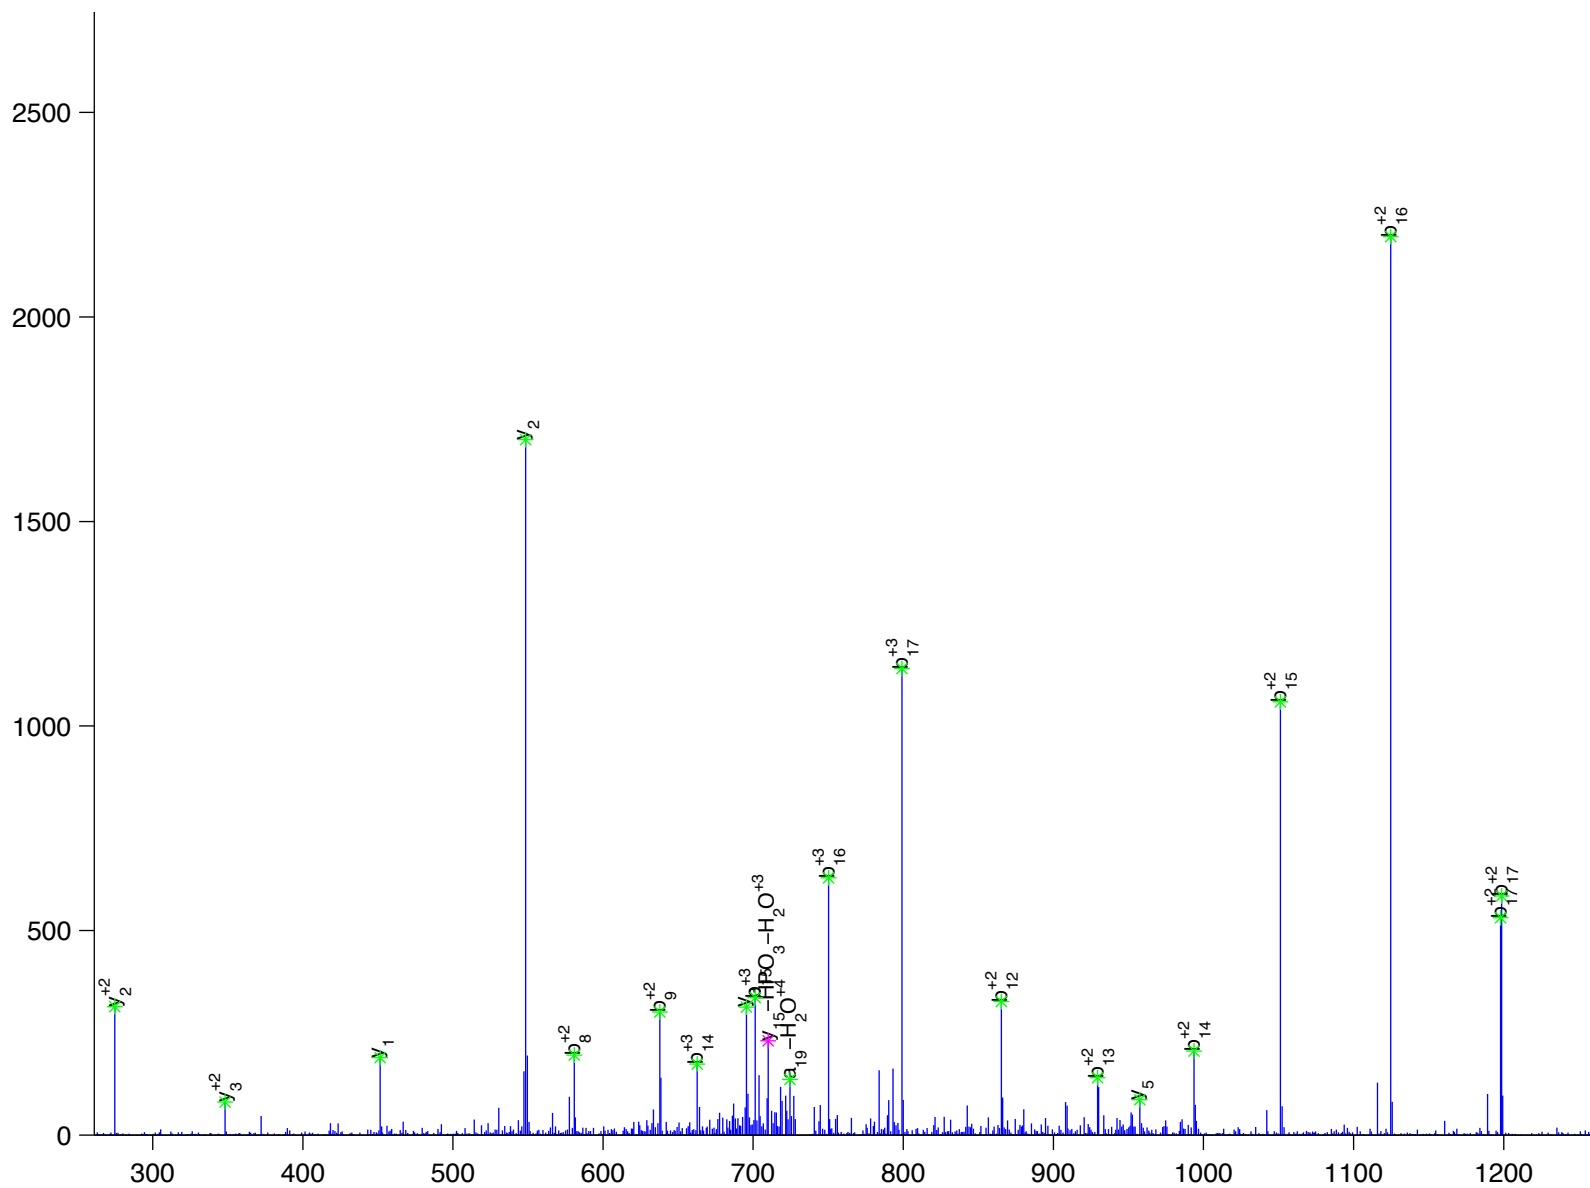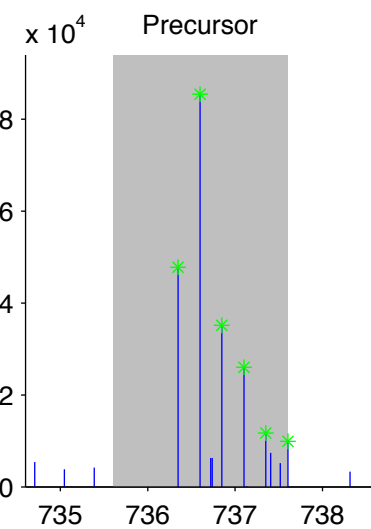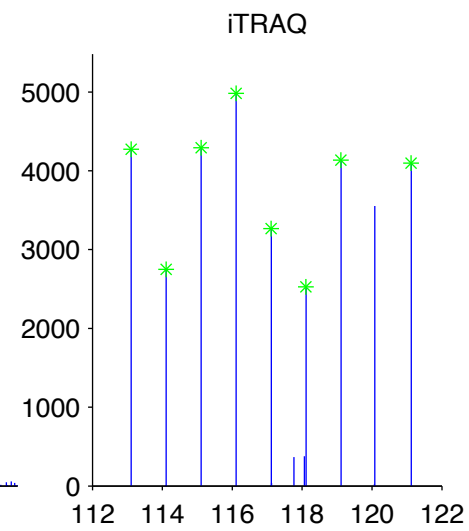



Y[S]S[D]P[T]G[A]V[T]E[D]N[I]D[D]A[F]L[P]V[P]E[y]V[N]Q[S]V[P]K

epidermal growth factor receptor isoform 1

Charge State: +4

Scan Number: 5673

File Name: 100908ptp1blivers\_ncHFD3\_basal.raw

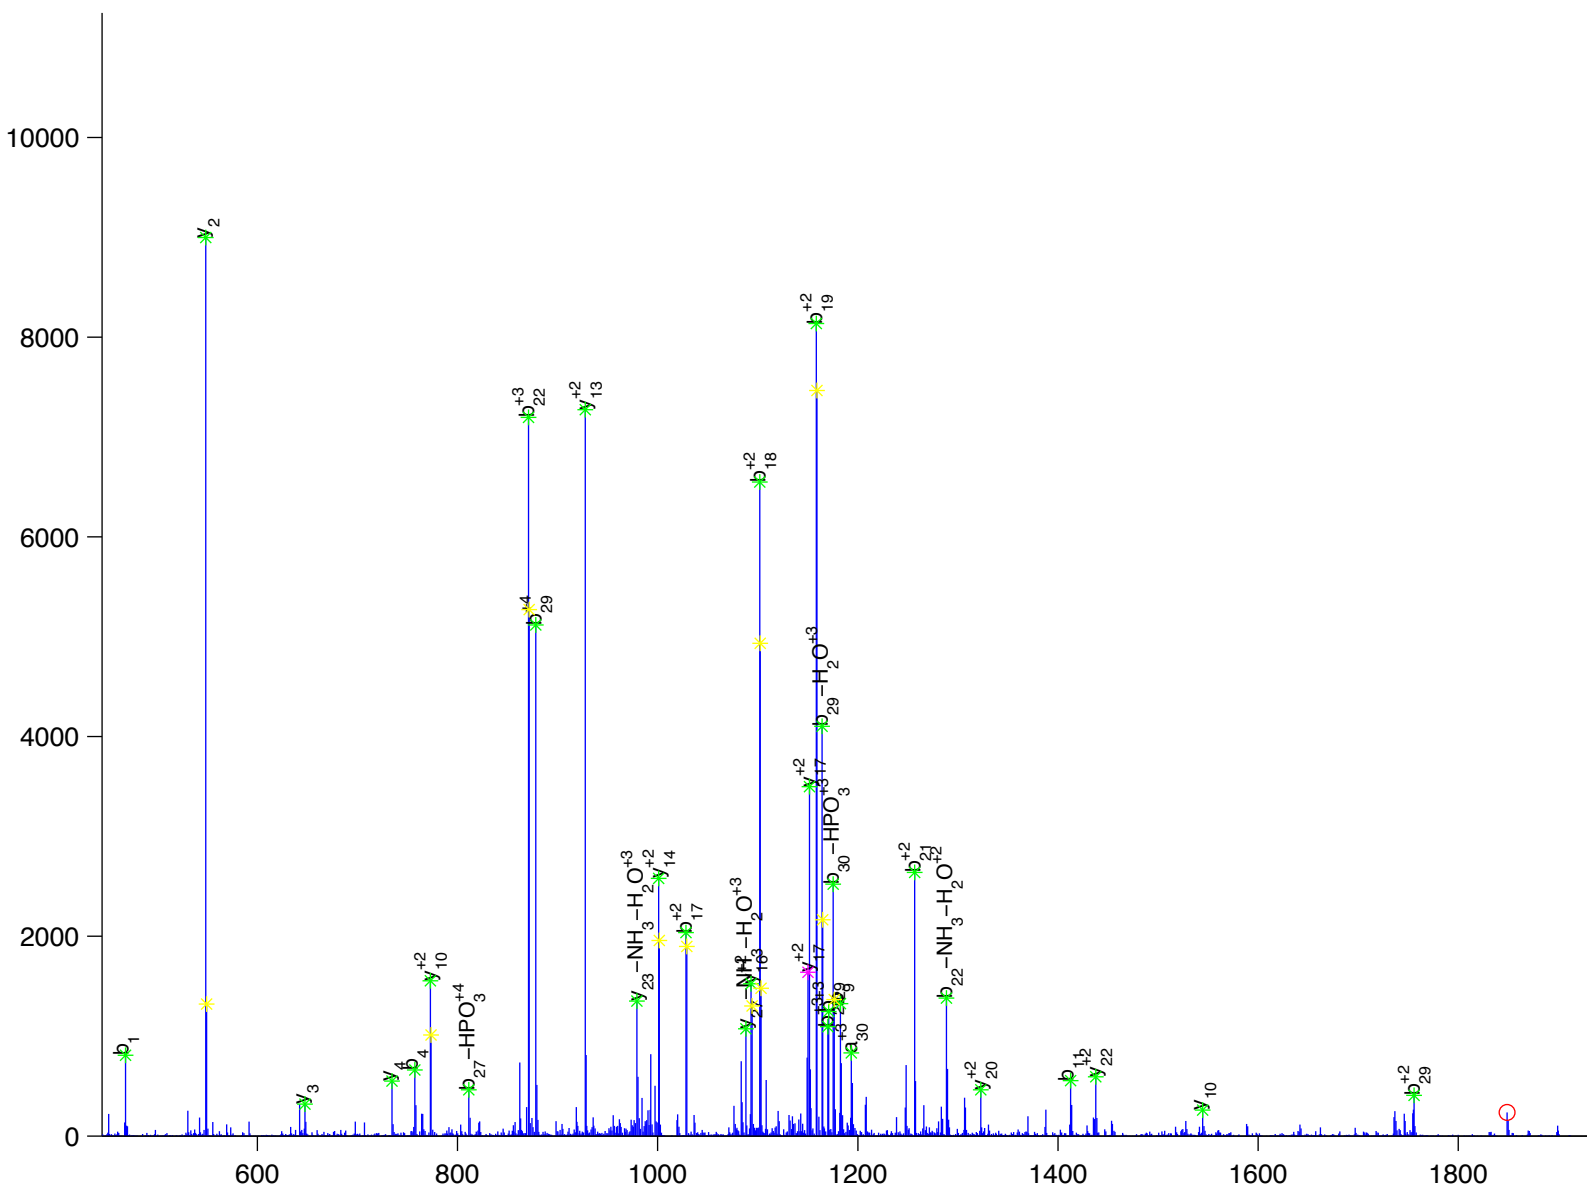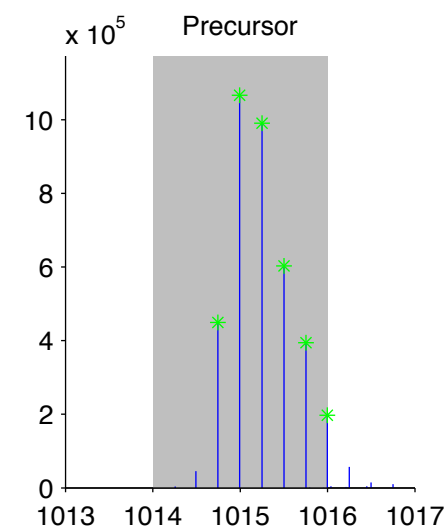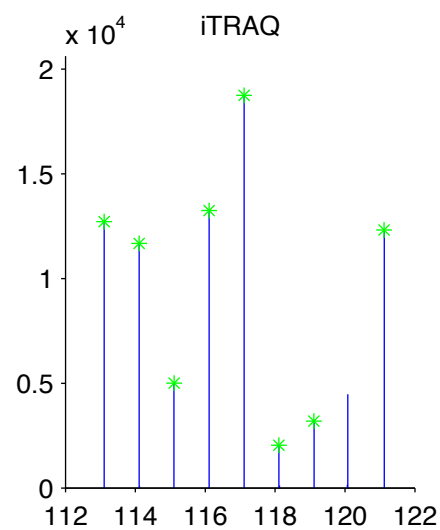

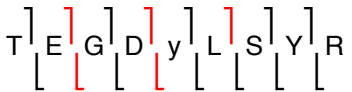

ErbB2 interacting protein isoform 2

Charge State: +2

Scan Number: 4282

File Name: HJ072909\_HFD\_E1.raw

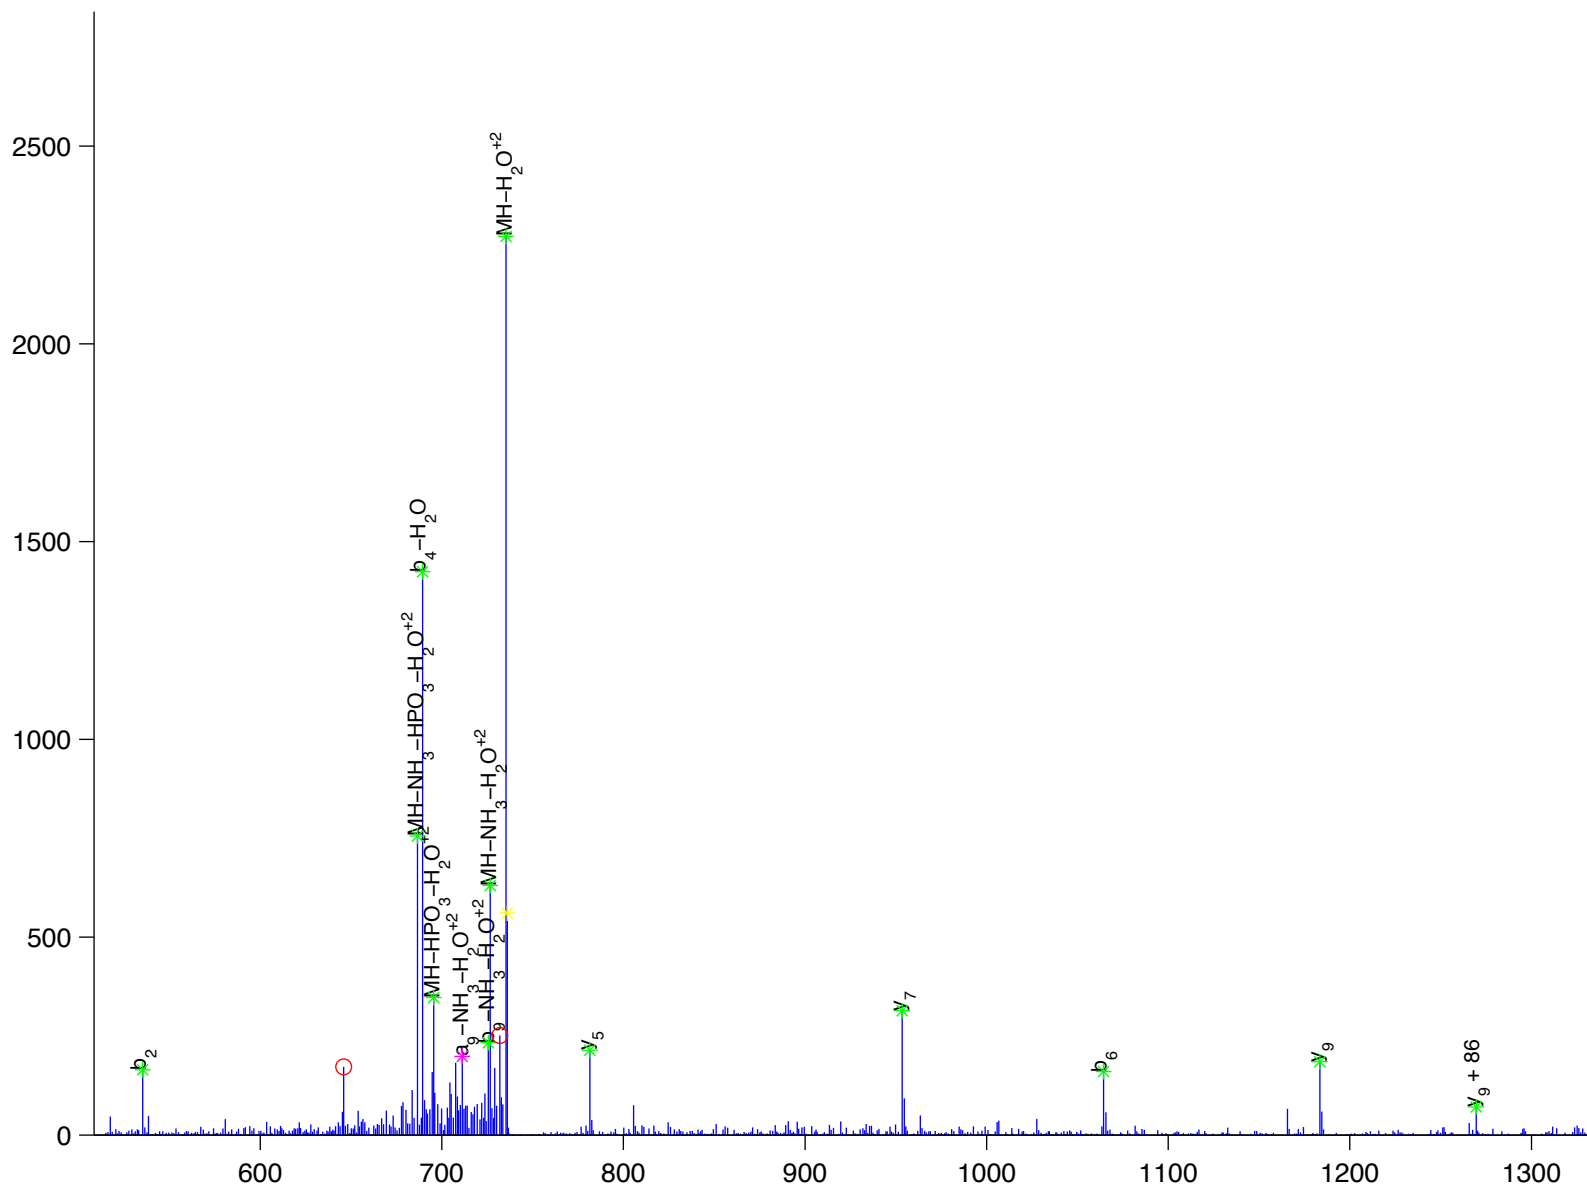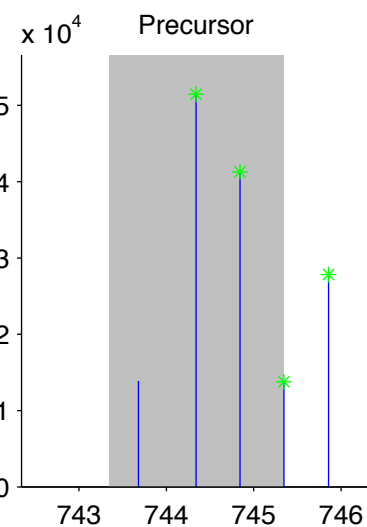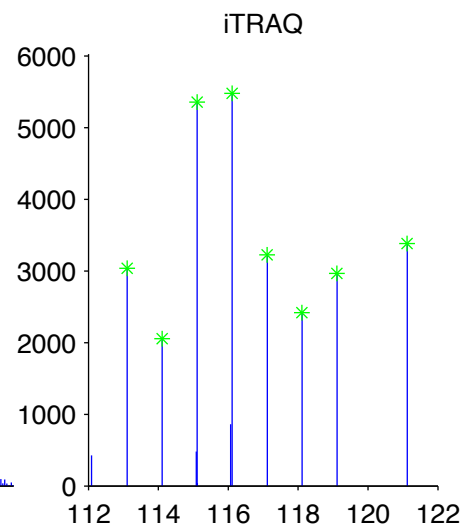

R T E G D y L S y R

ErbB2 interacting protein isoform 2

Charge State: +3

Scan Number: 4971

File Name: 100908ptp1blivers\_ncHFD3\_basal.raw

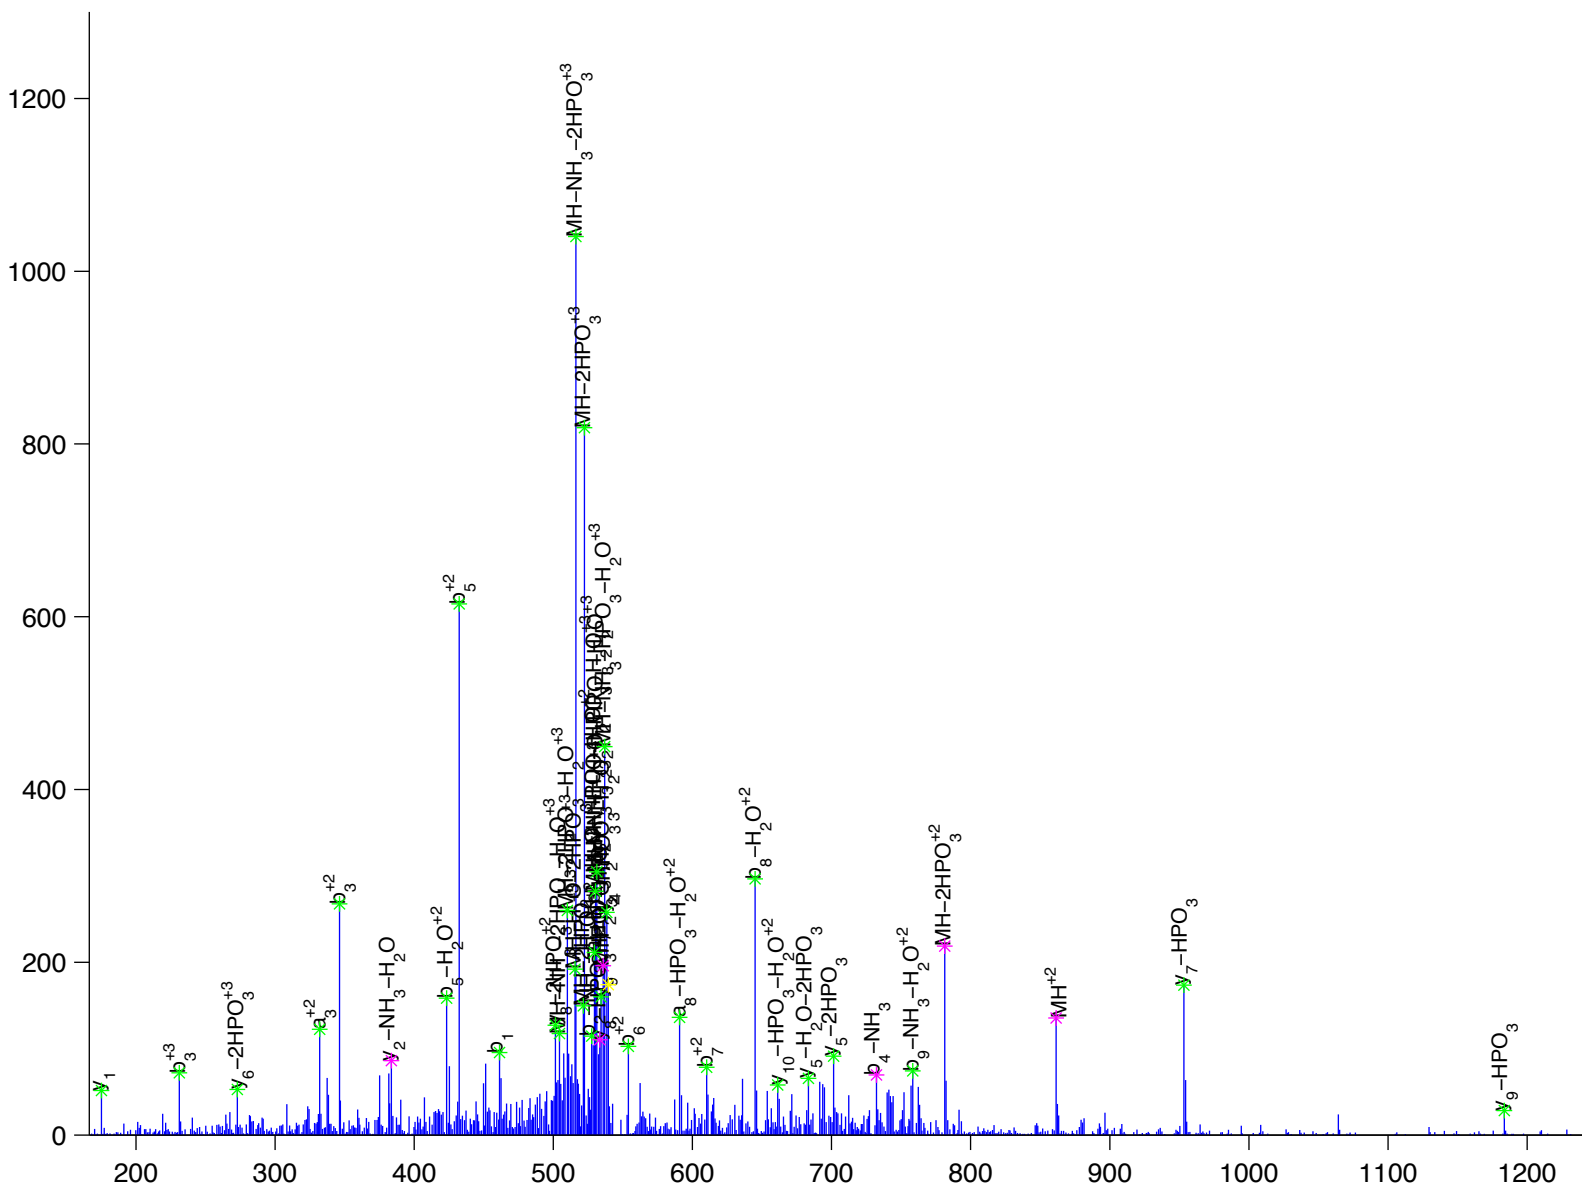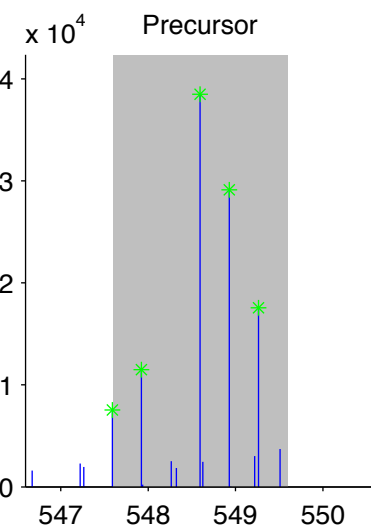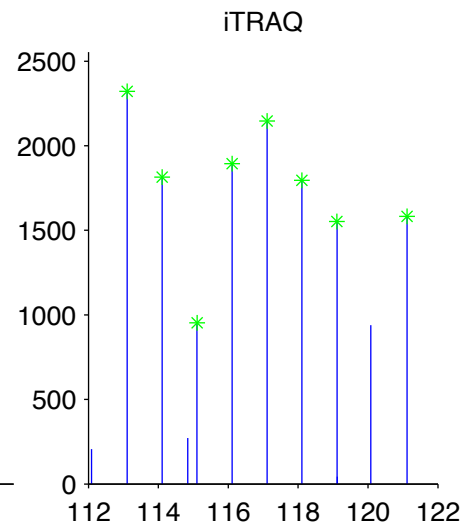

E[V]S[T]y[I]K

eukaryotic translation elongation factor 1 alpha 1

Charge State: +3

Scan Number: 5411

File Name: 090807ptp1blivers\_M\_HFD\_basal.raw

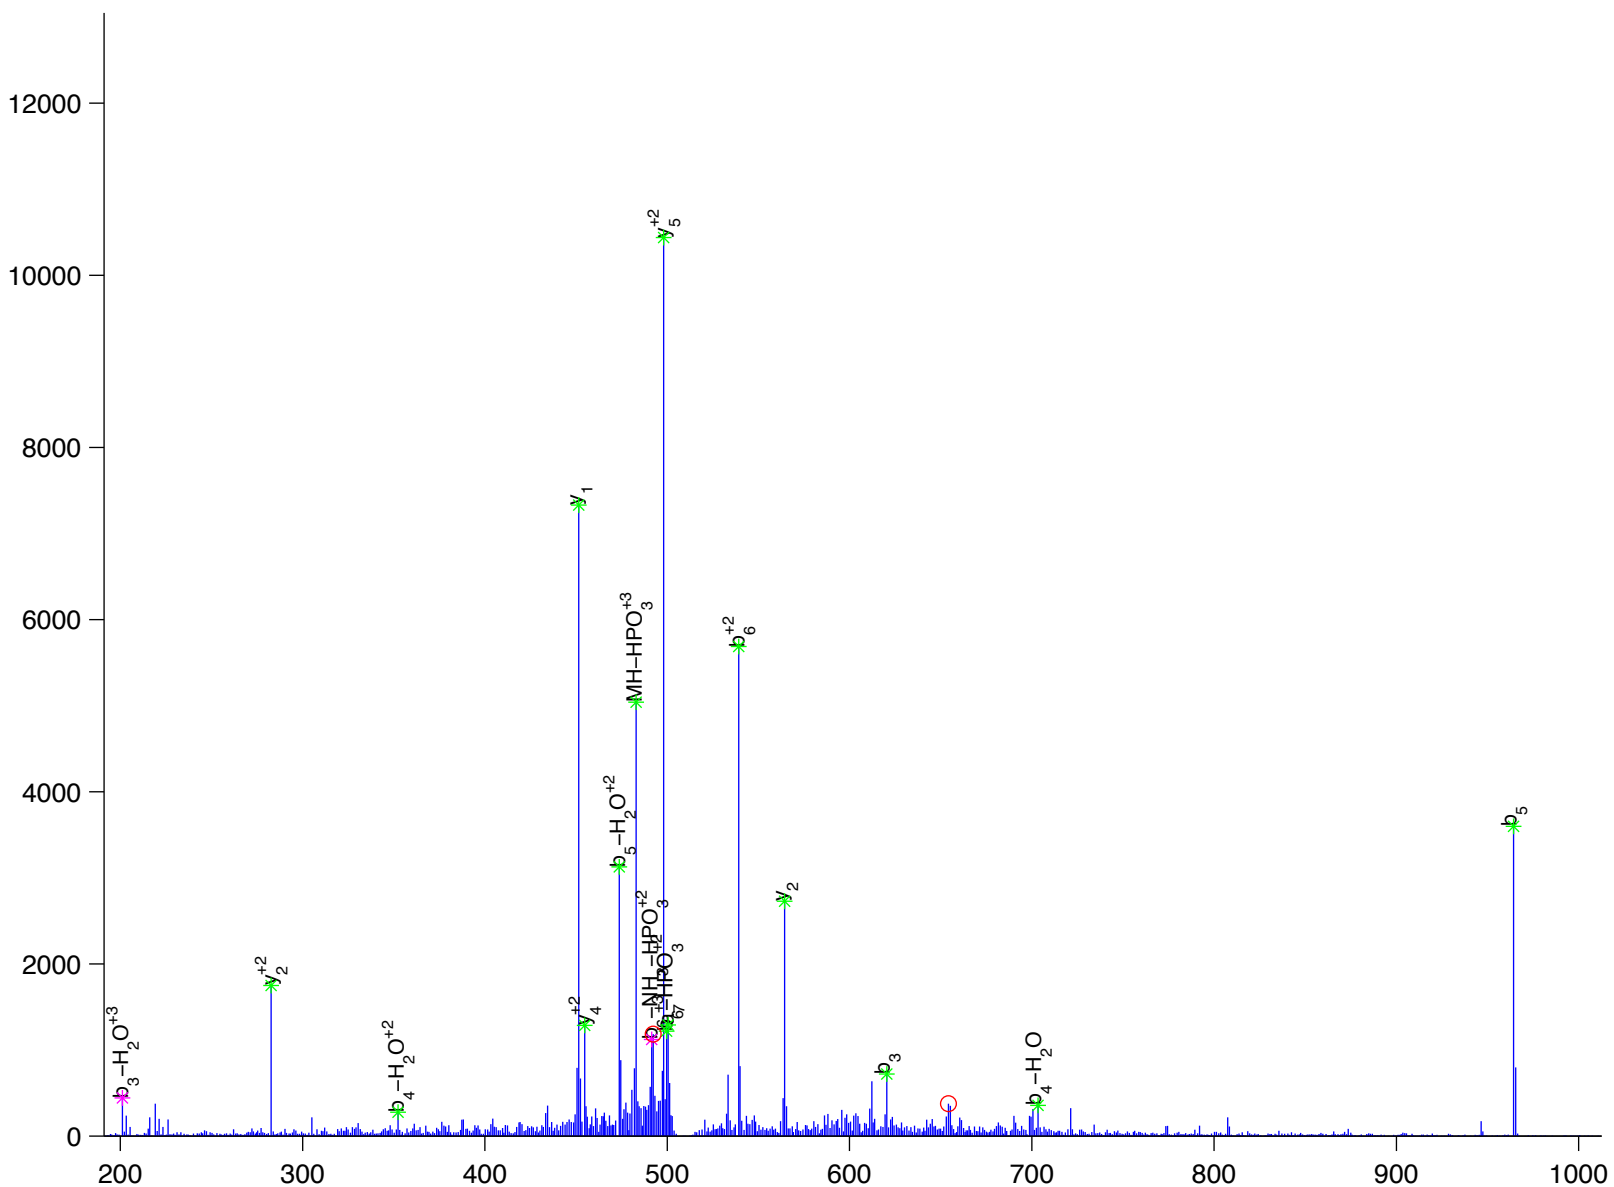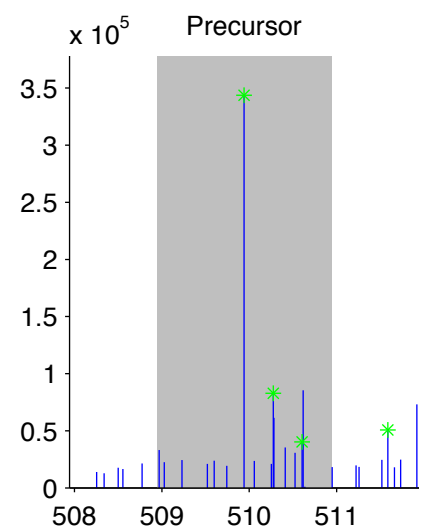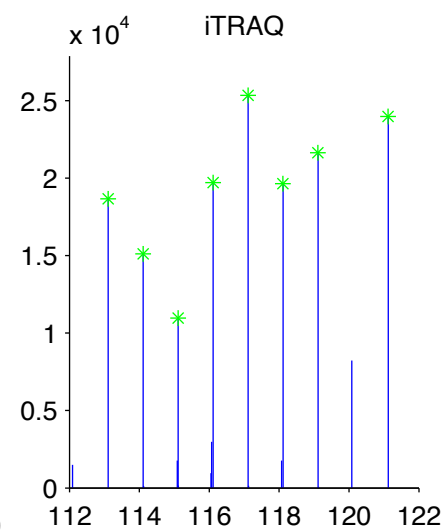

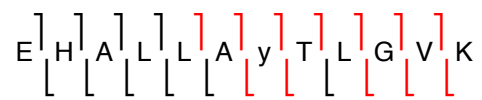

eukaryotic translation elongation factor 1 alpha 2  
 Charge State: +3  
 Scan Number: 2287  
 File Name: HJ072909\_HFD\_E1\_2.raw

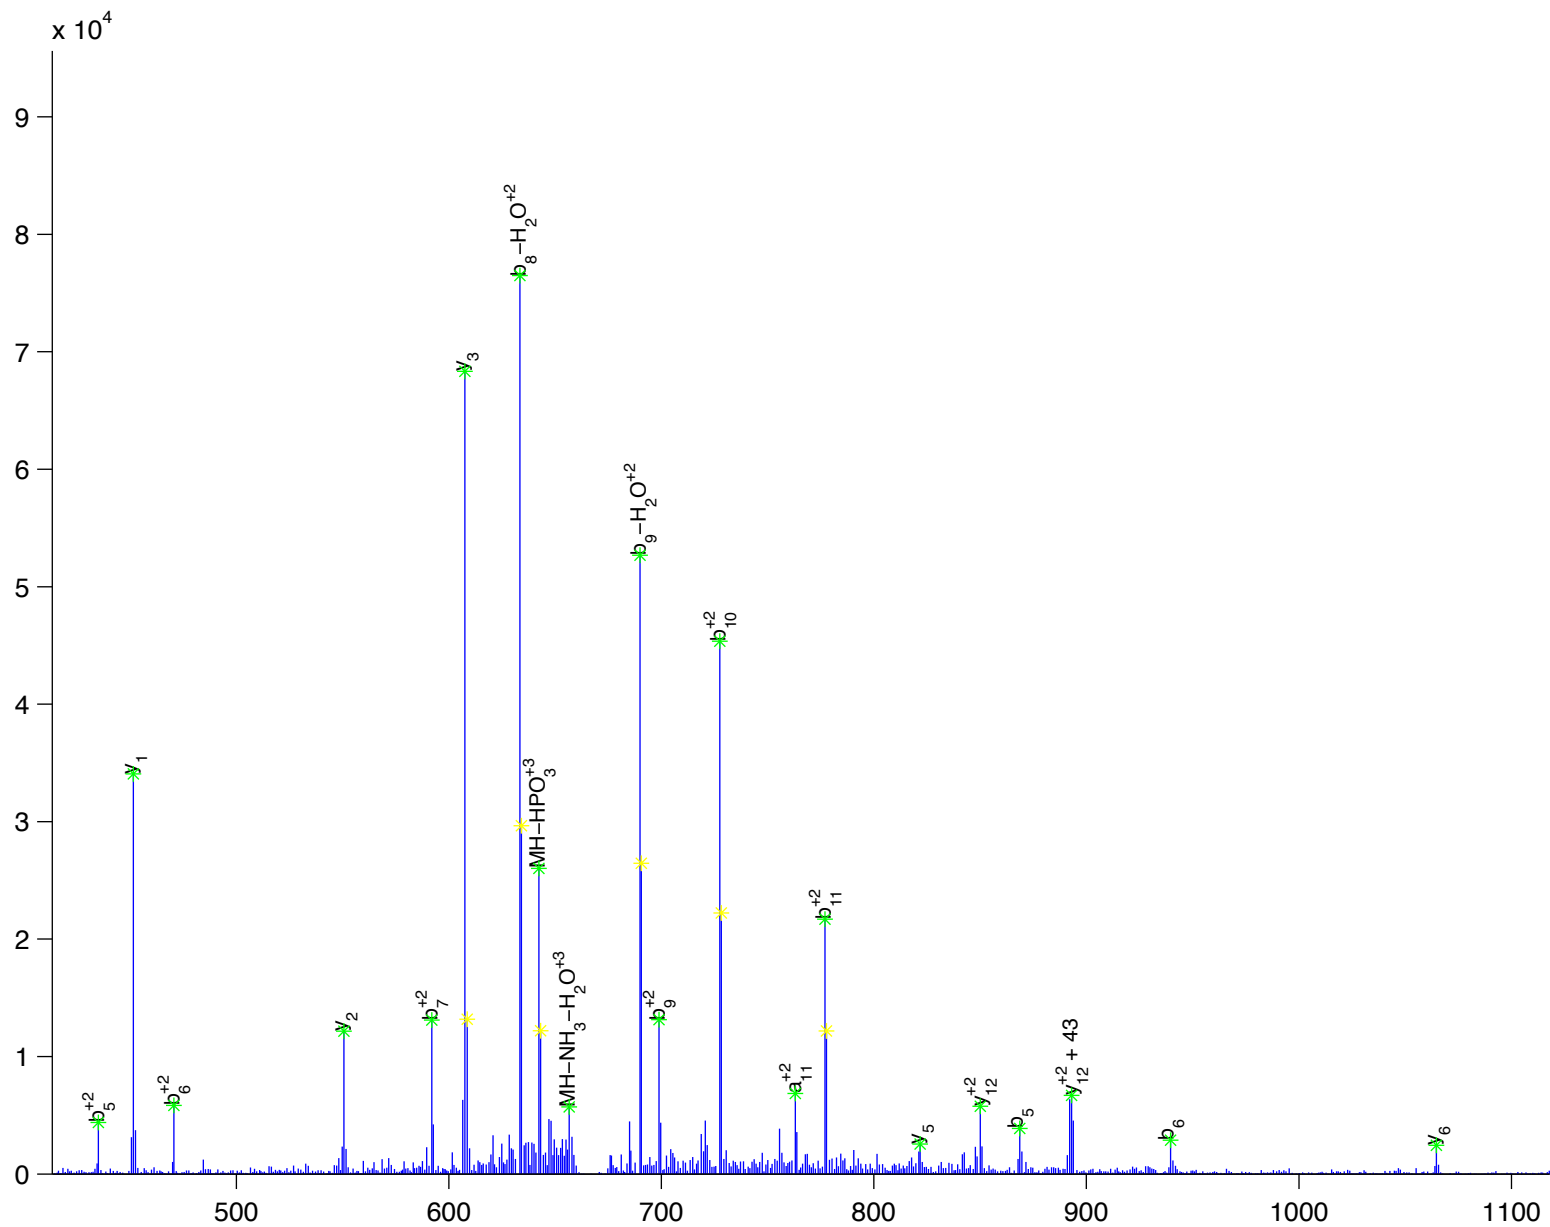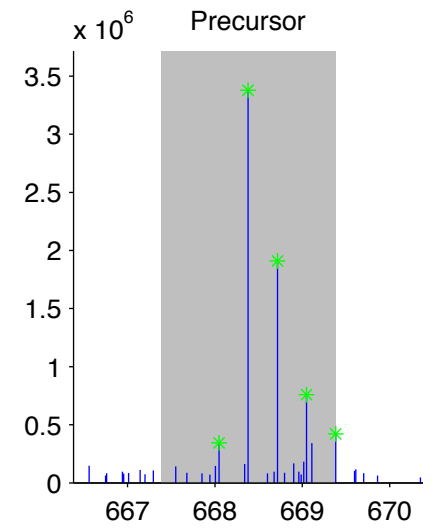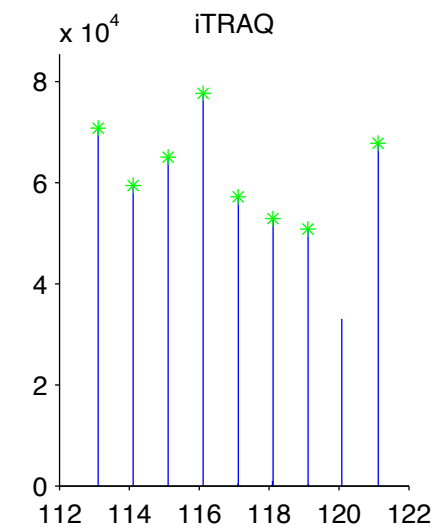

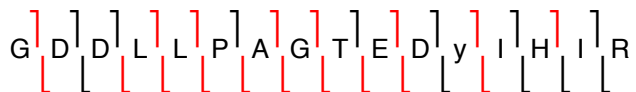

eukaryotic translation initiation factor 1B

Charge State: +3

Scan Number: 4631

File Name: 100827ptp1blivers\_ncHFD\_basal.raw

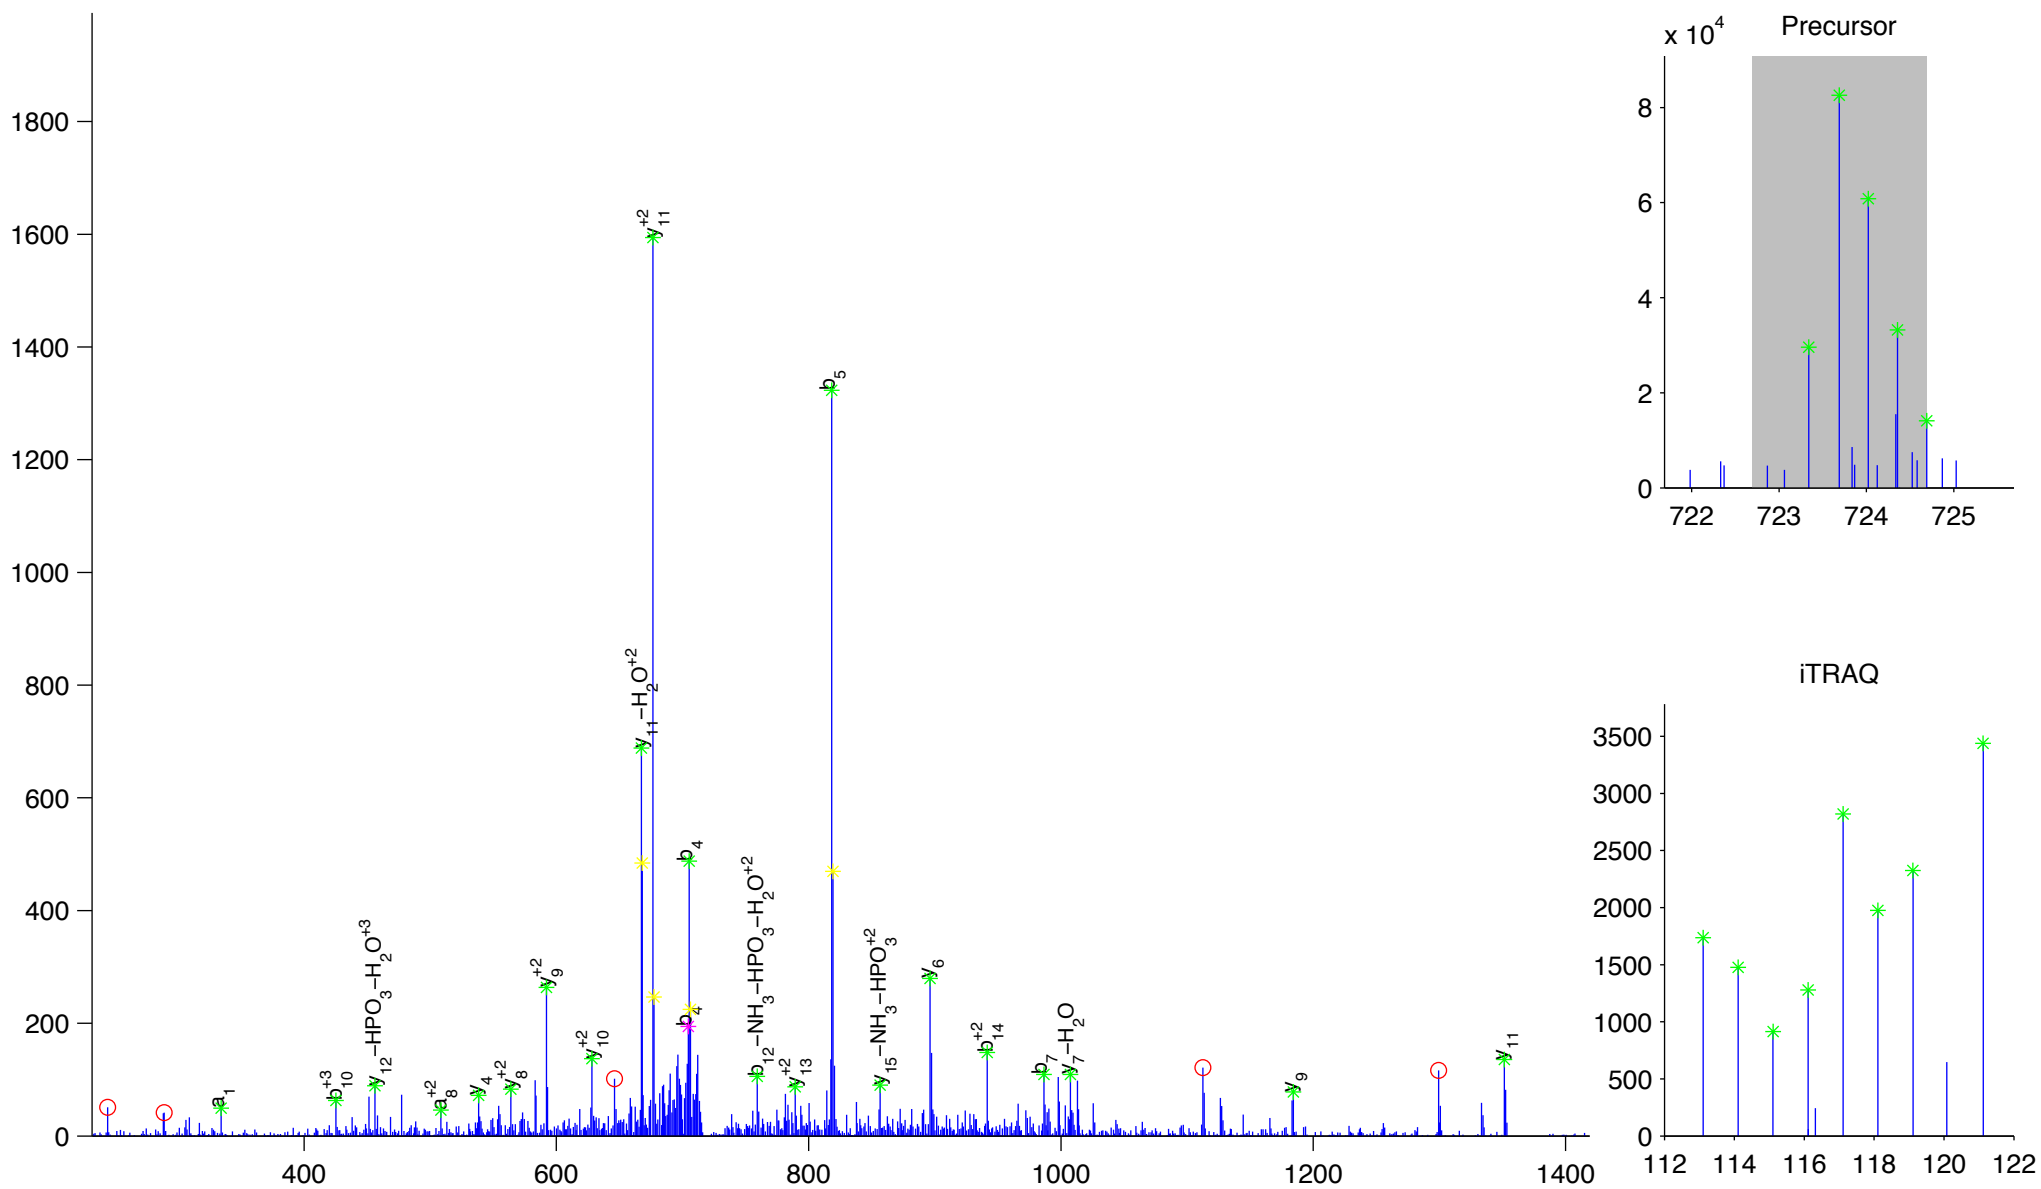

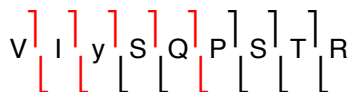

F11 receptor  
Charge State: +2  
Scan Number: 4204  
File Name: 091130ptp1blivers\_hfd\_basal2.raw

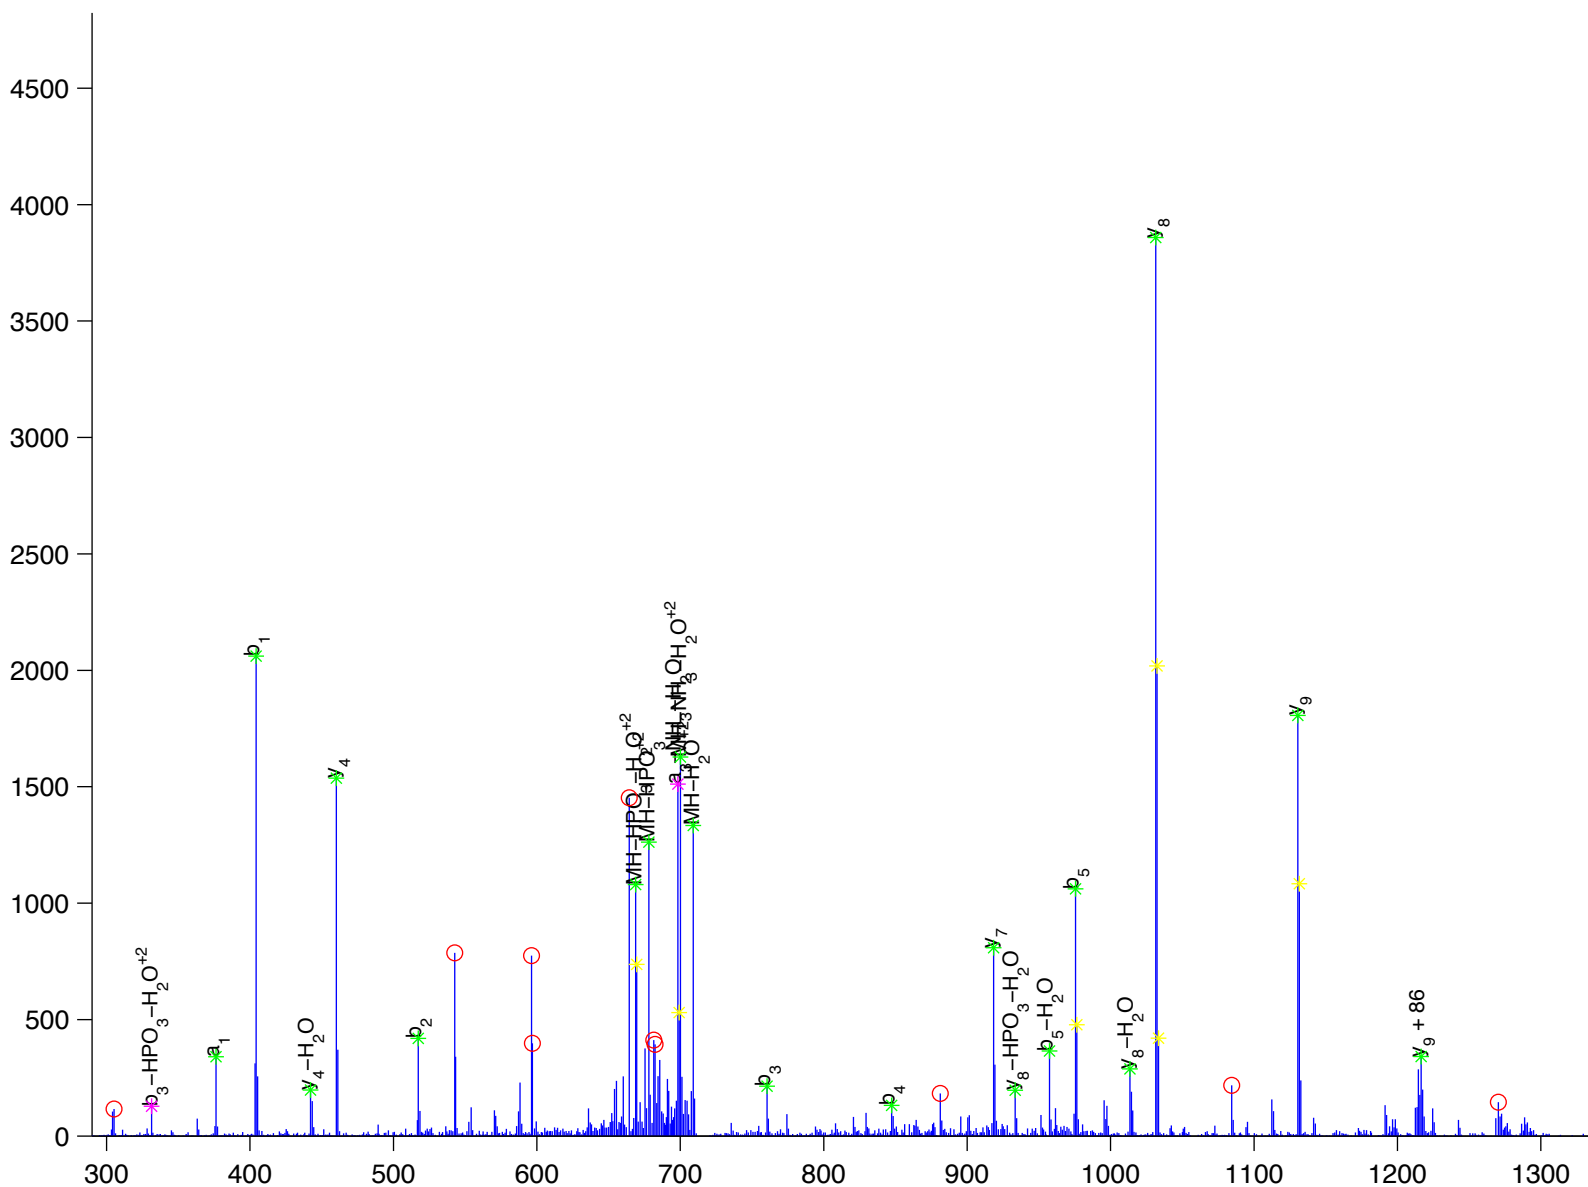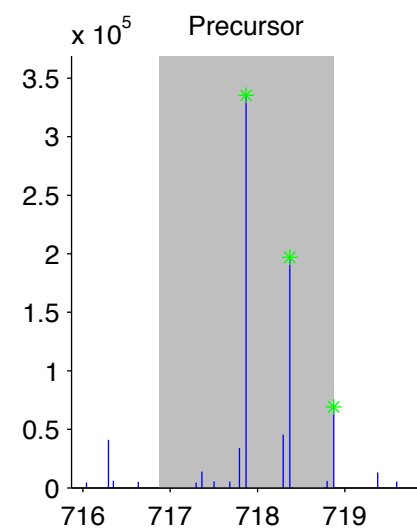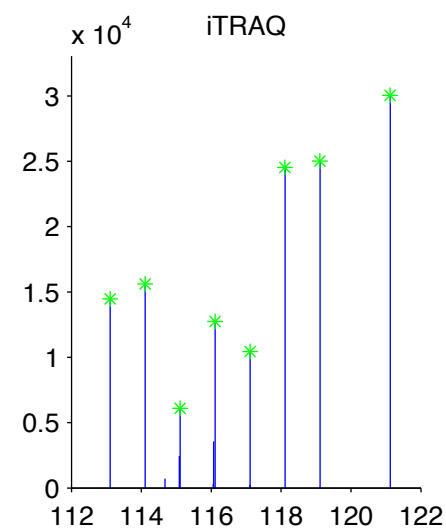





H [ P ] E [ A ] L [ D ] E [ E ] T [ E ] H [ D ] y [ Q ] N [ H ]

Fc receptor, IgG, low affinity IIb isoform 2

Charge State: +4

Scan Number: 5704

File Name: 100908ptp1blivers\_ncHFD3\_basal.raw

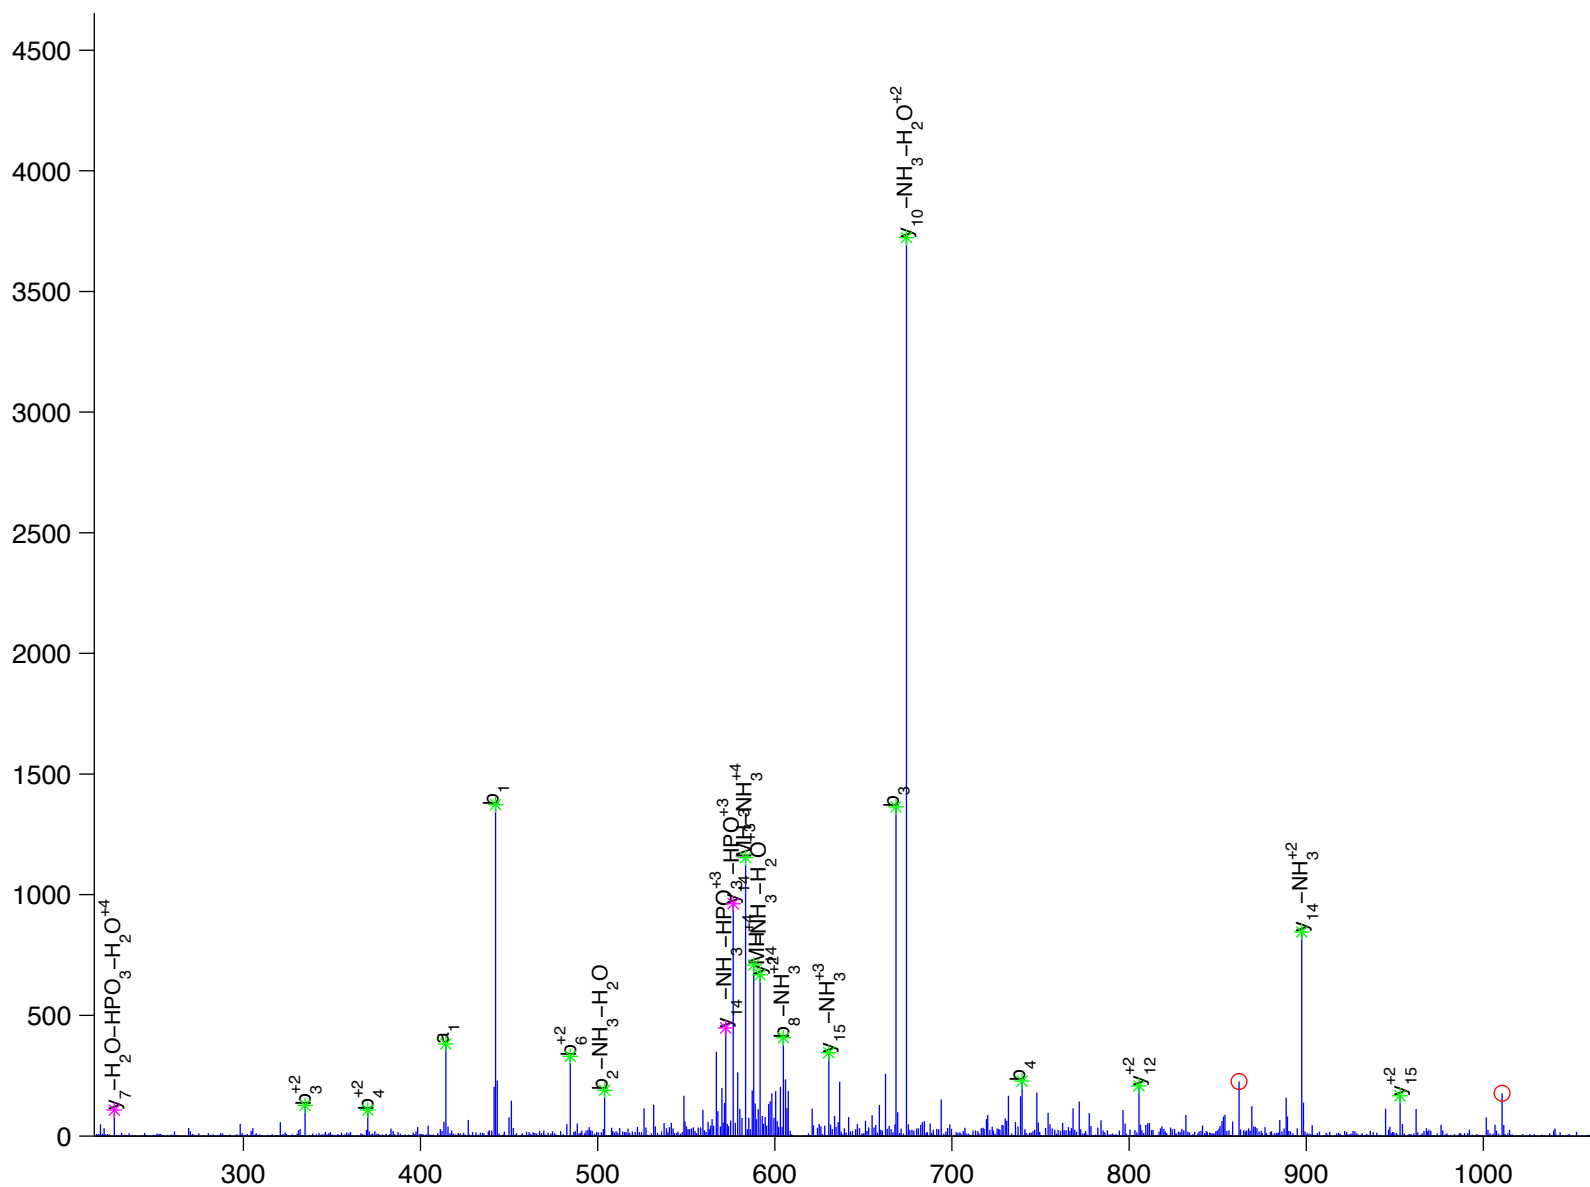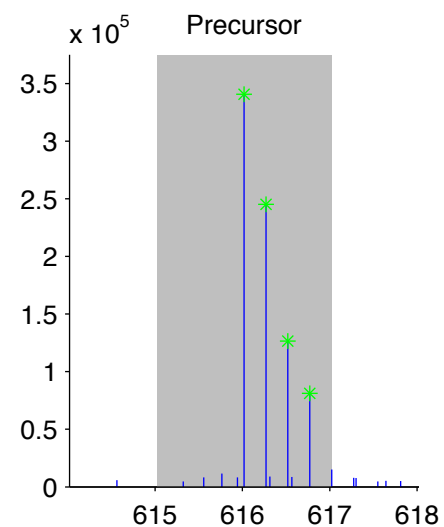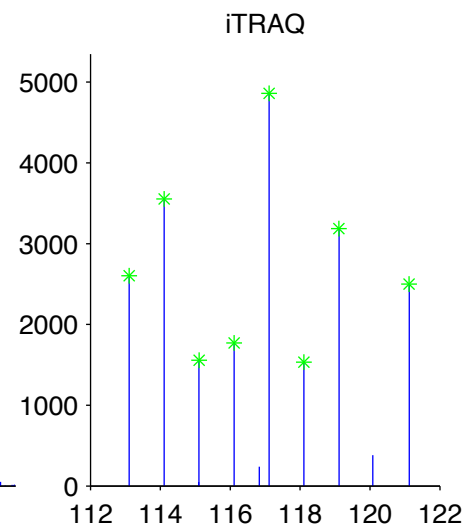

Q[E]D[G]G[V]y[S]S[S]G[L]K

fer (fms/fps related) protein kinase, testis specific 2 isoform a

Charge State: +3

Scan Number: 4160

File Name: 091130ptp1blivers\_hfd\_basal2.raw

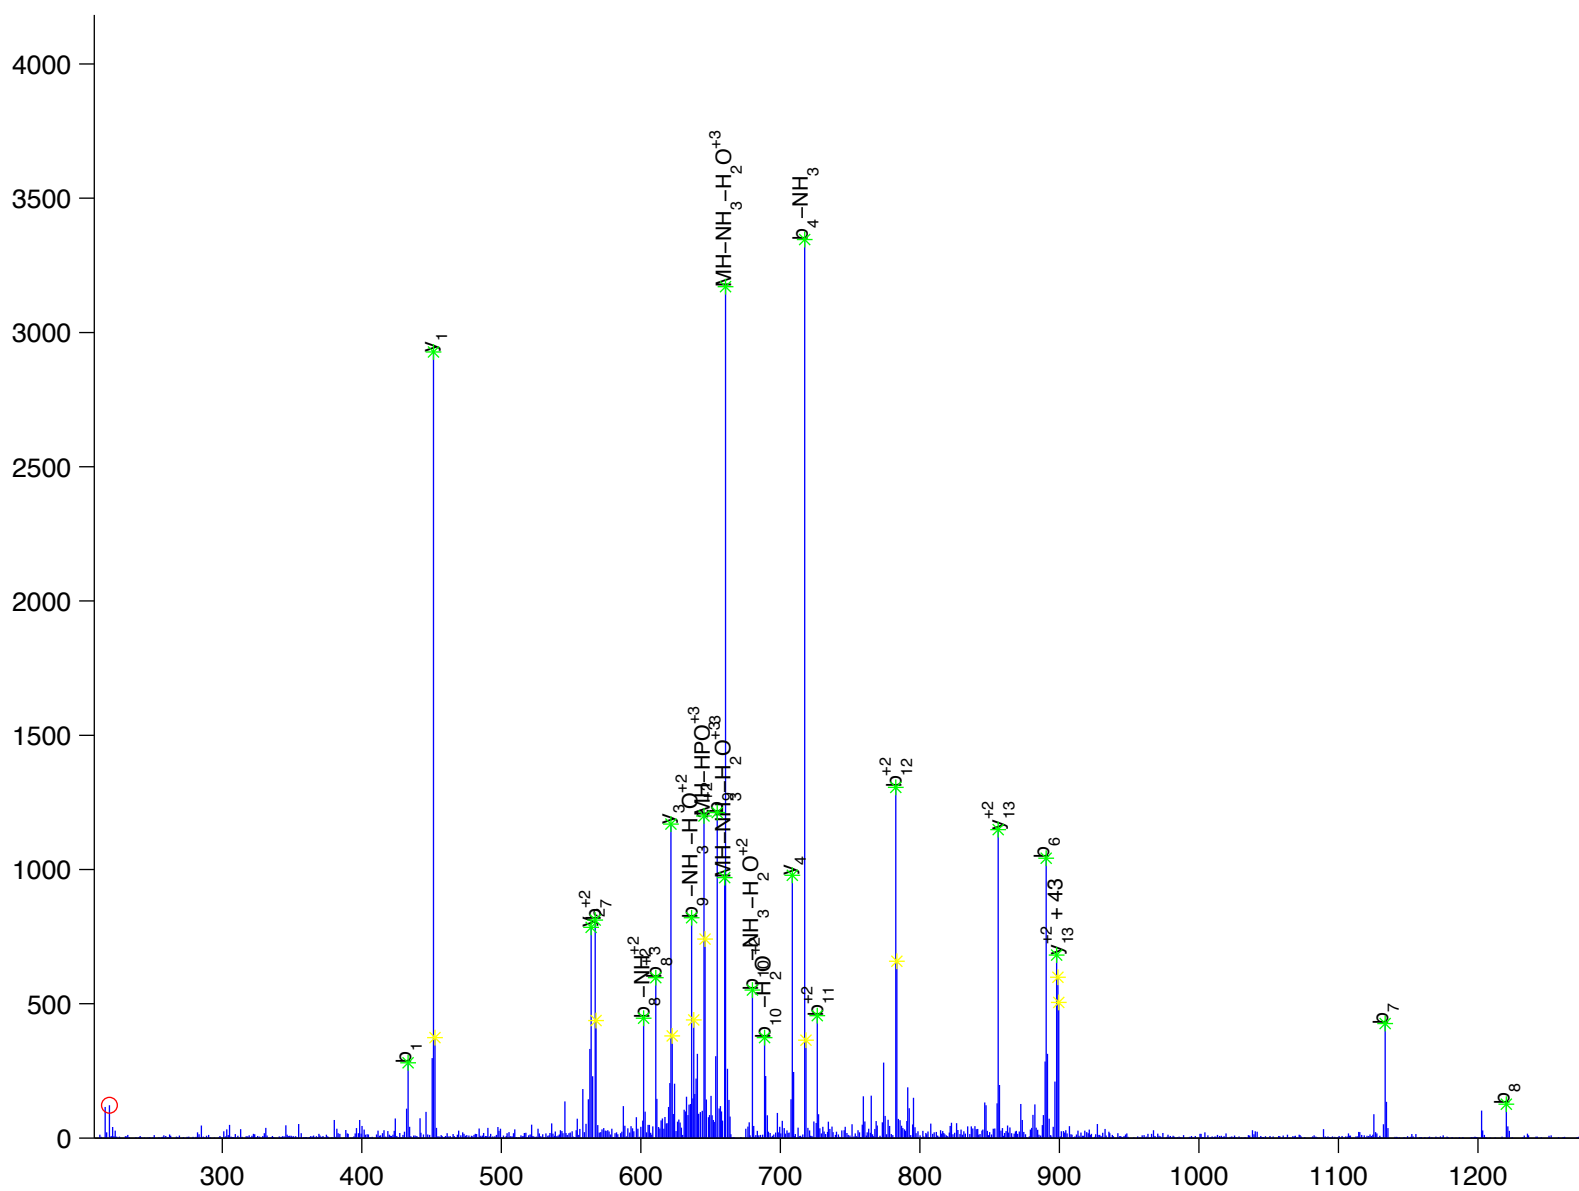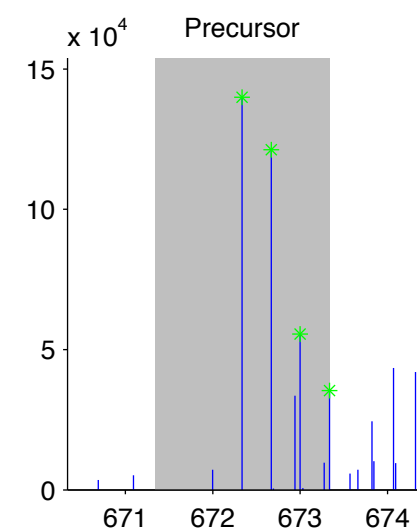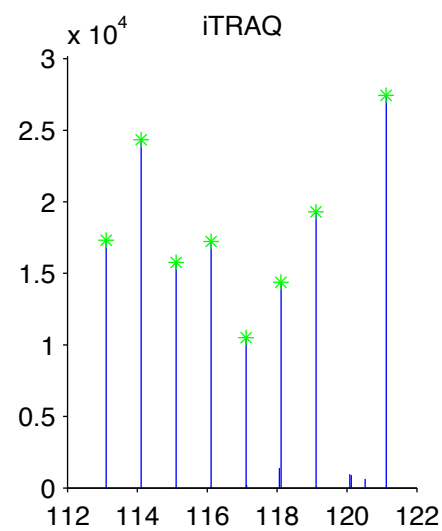

V<sup>[</sup>Q<sup>]</sup>E<sup>[</sup>N<sup>]</sup>D<sup>[</sup>G<sup>]</sup>K<sup>[</sup>E<sup>]</sup>P<sup>[</sup>P<sup>]</sup>P<sup>[</sup>V<sup>]</sup>V<sup>]</sup>N<sup>]</sup>y<sup>]</sup>E<sup>]</sup>E<sup>]</sup>D<sup>]</sup>A<sup>]</sup>R

fer (fms/fps related) protein kinase, testis specific 2 isoform a  
 Charge State: +4  
 Scan Number: 4485  
 File Name: 091130ptp1blivers\_hfd\_basal2.raw

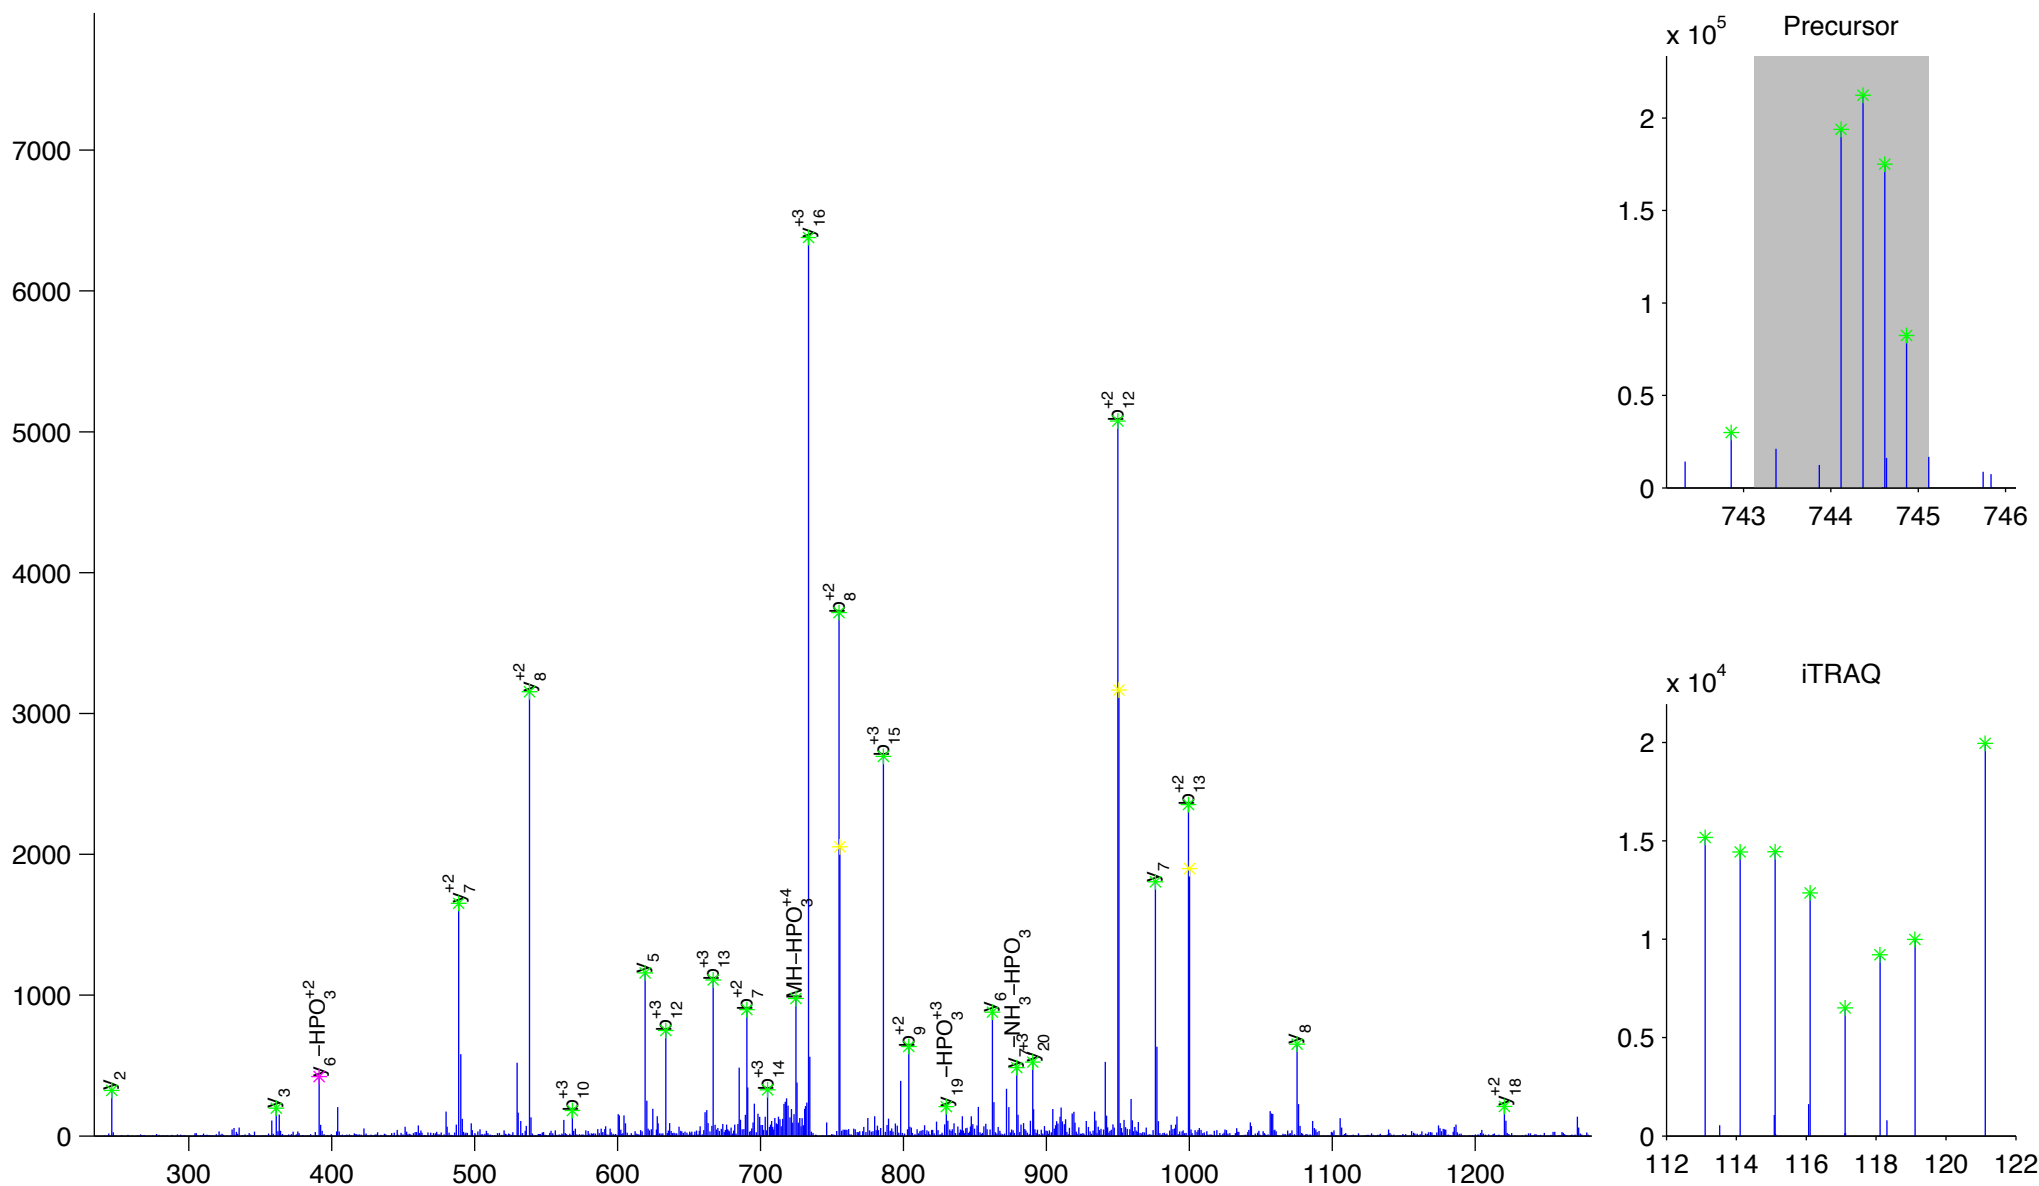

G  
[ N ]  
[ I ]  
[ Y ]  
[ S ]  
[ L ]  
[ N ]  
[ E ]  
[ G ]  
y  
[ A ]  
[ K ]

fructose bisphosphatase 1

Charge State: +3

Scan Number: 322

File Name: HJ072909\_HFD\_E1\_2.raw

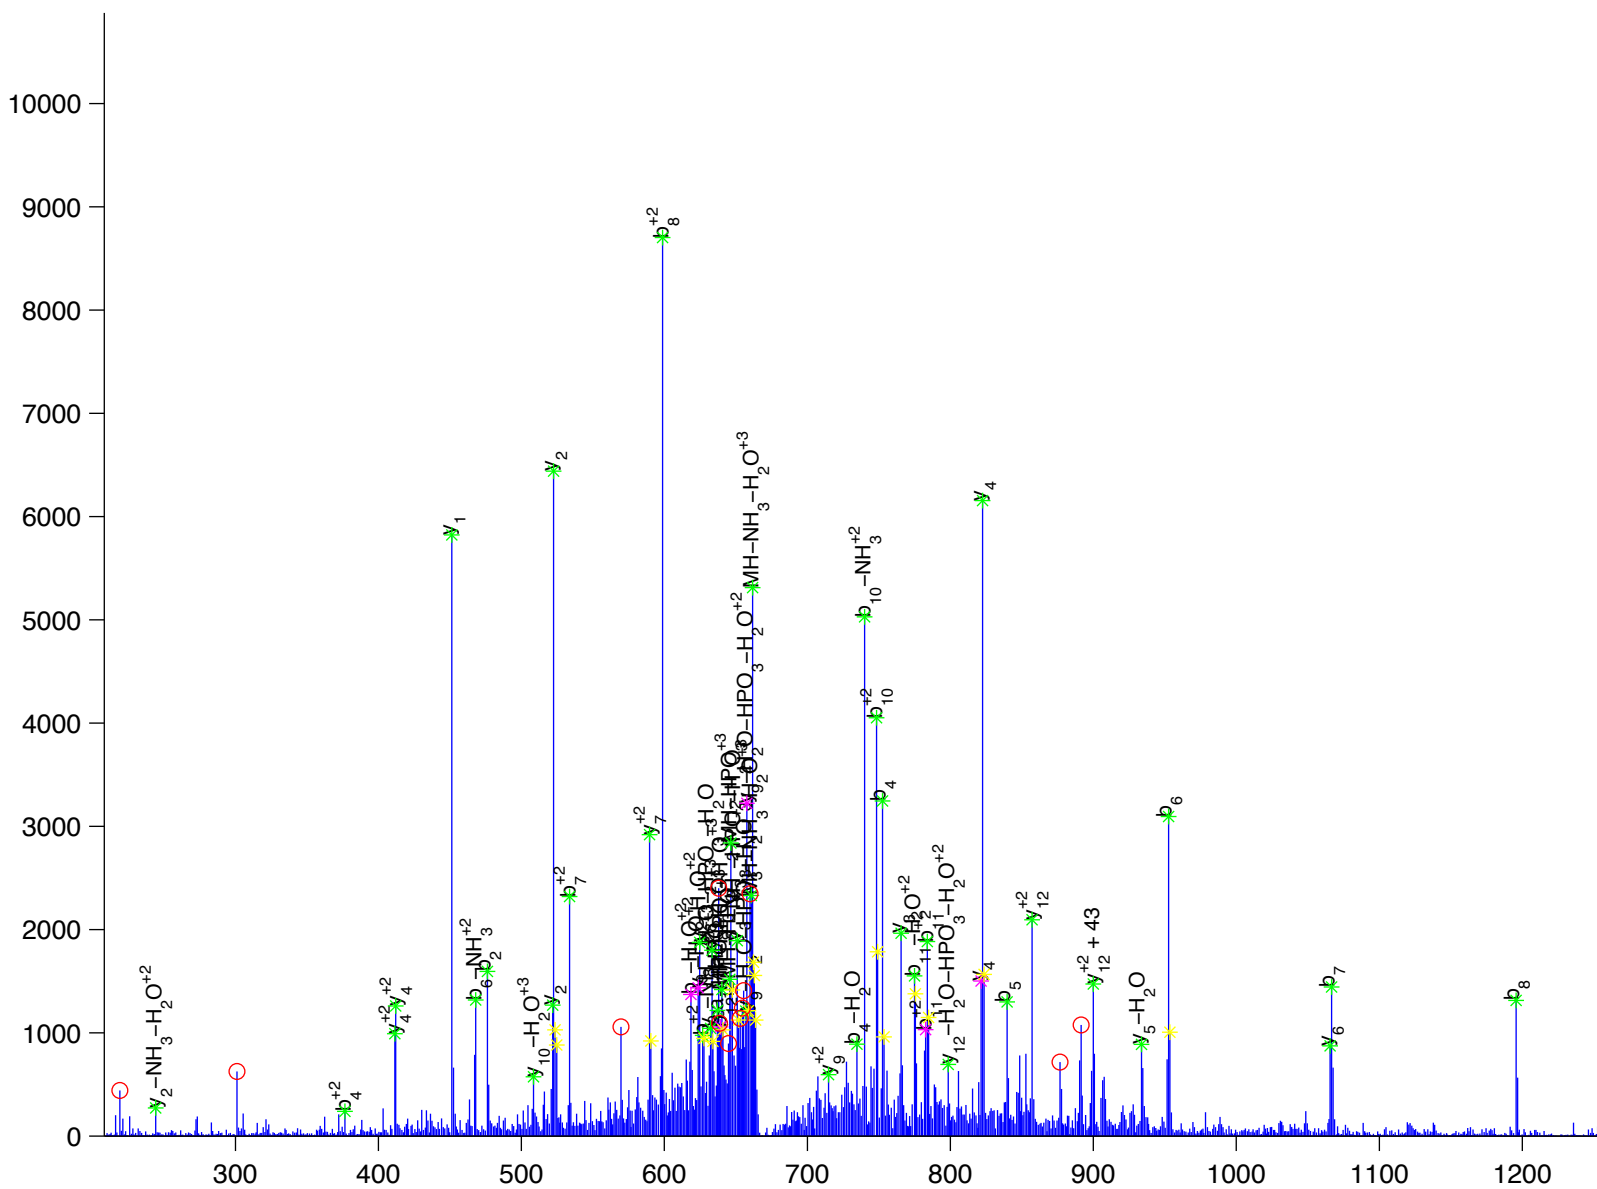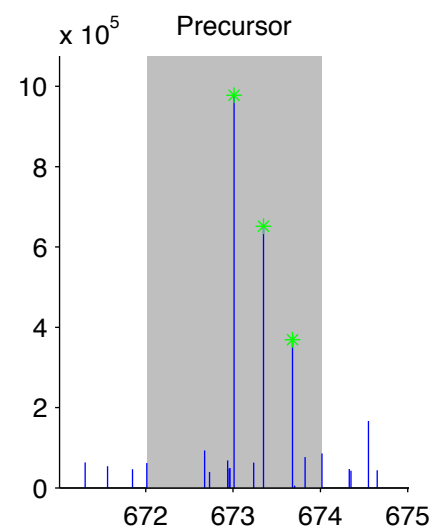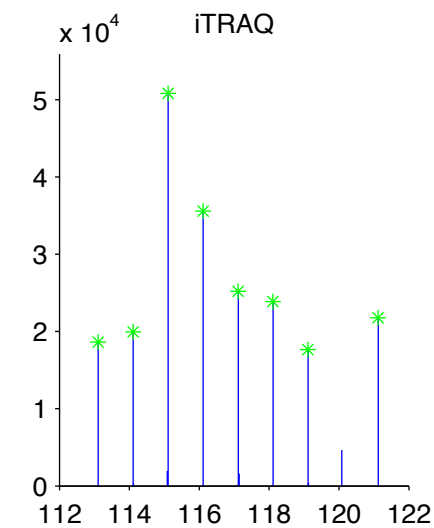

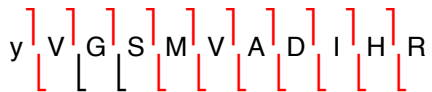

fructose biphosphatase 1

Charge State: +3

Scan Number: 5508

File Name: 091130ptp1blivers\_hfd\_basal2.raw

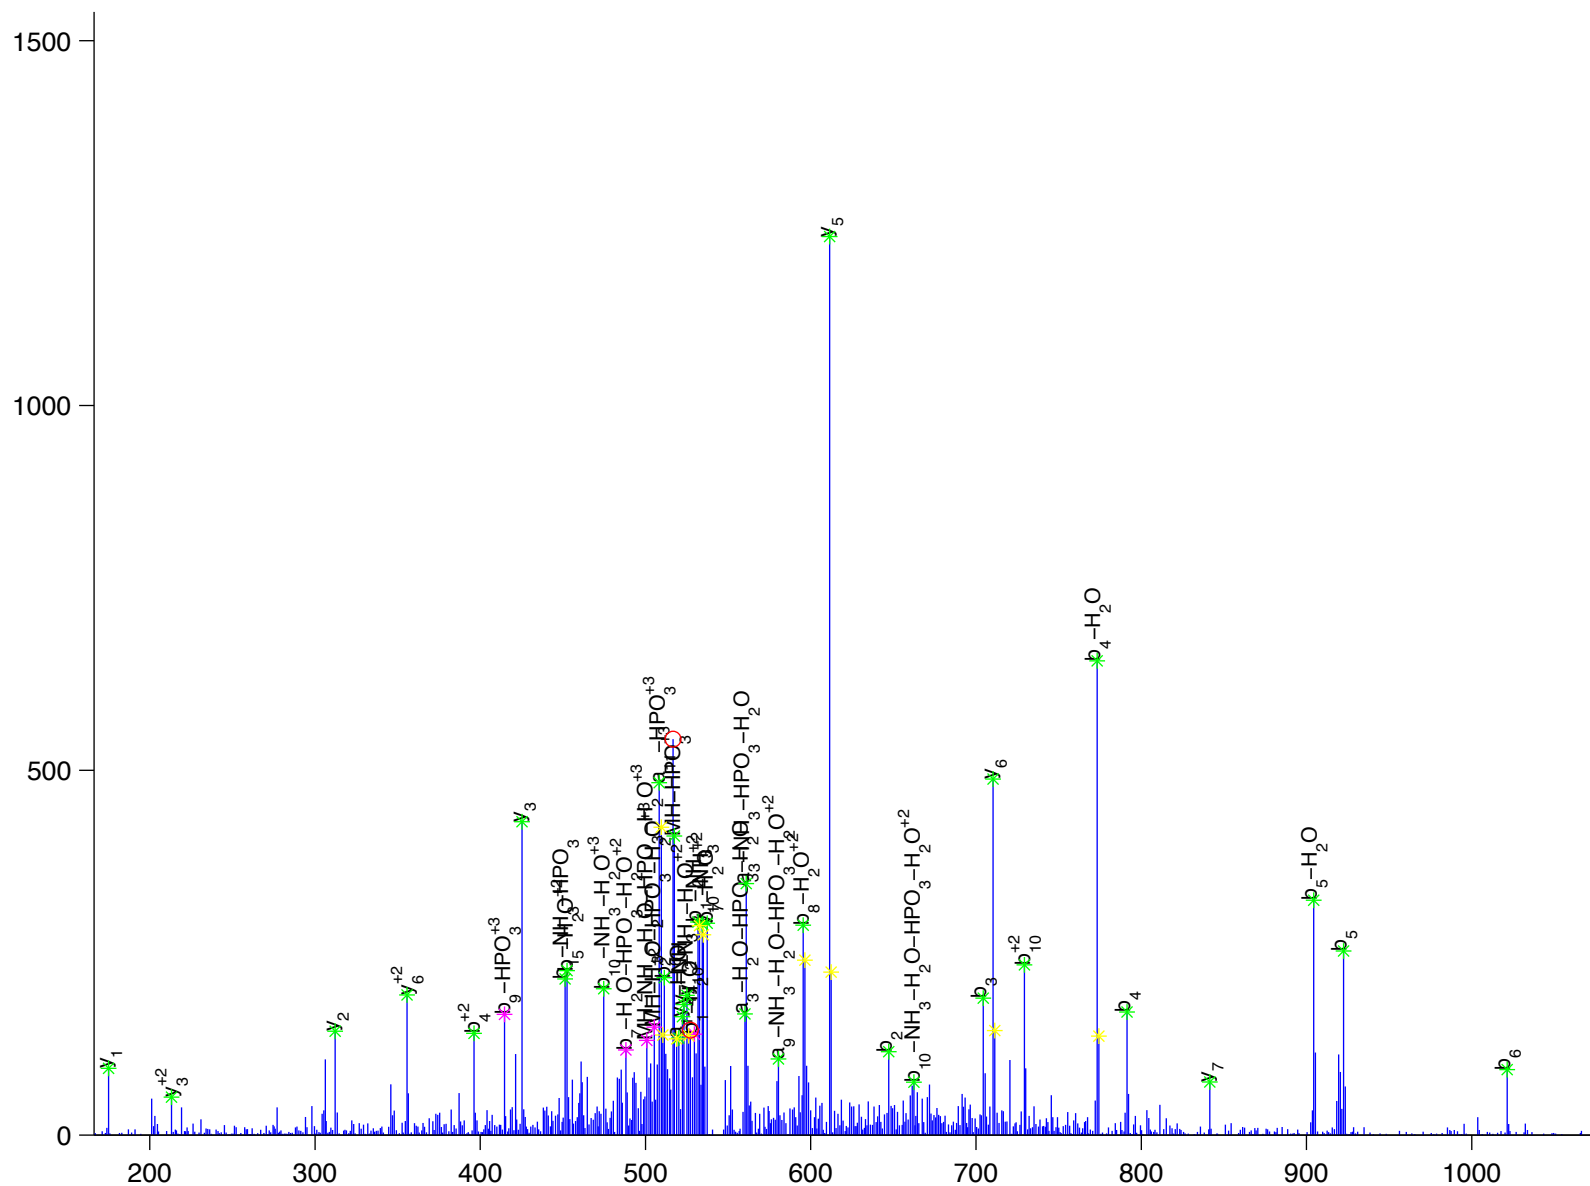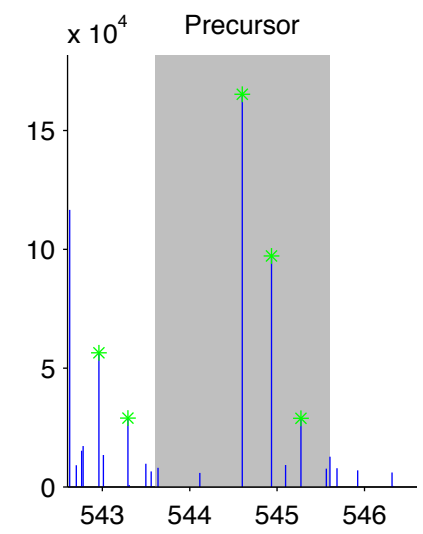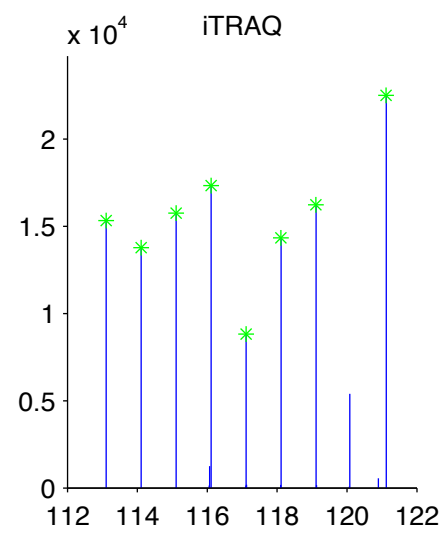

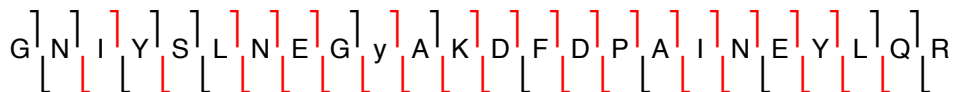

fructose bisphosphatase 1

Charge State: +4

Scan Number: 6072

File Name: 100908ptp1blivers\_ncHFD3\_basal.raw

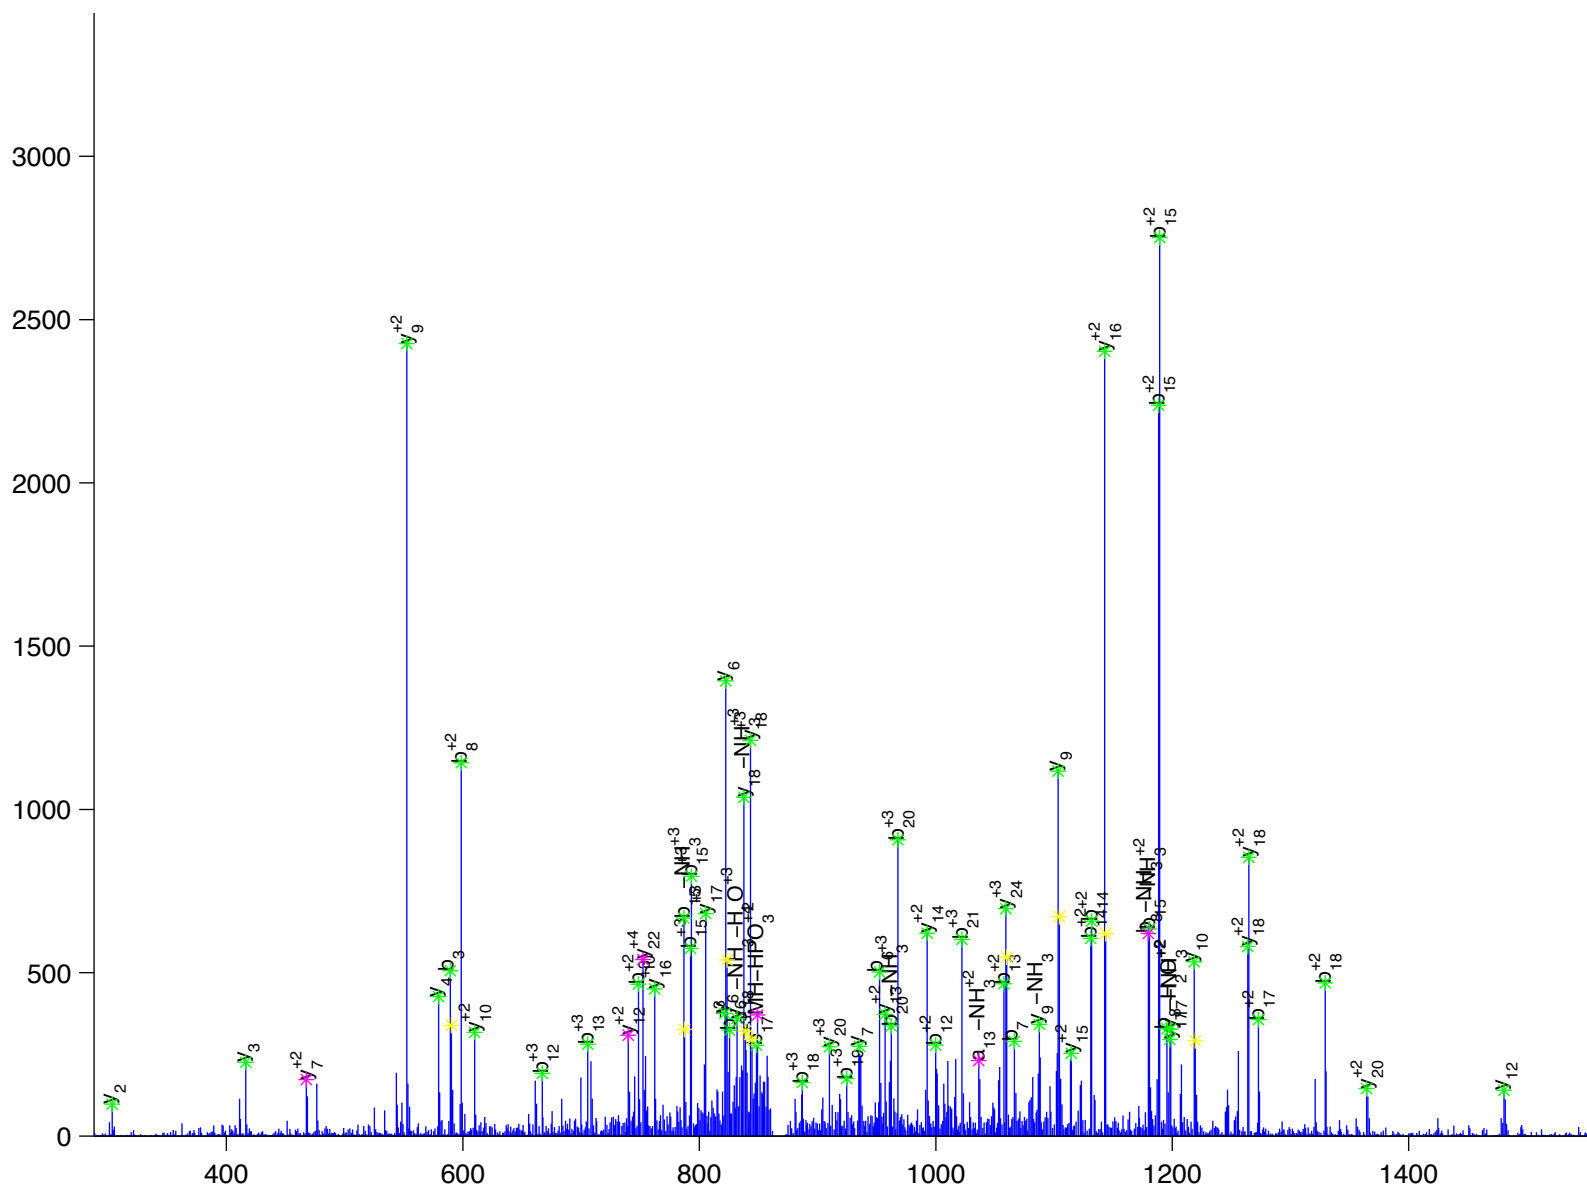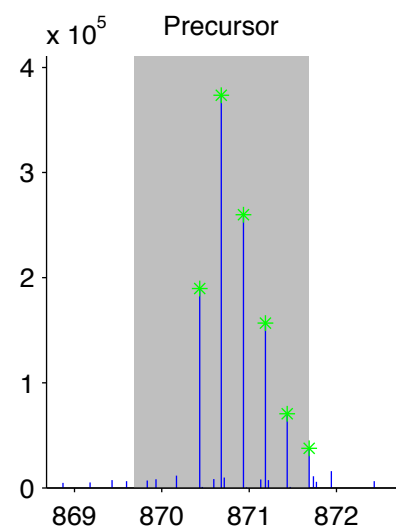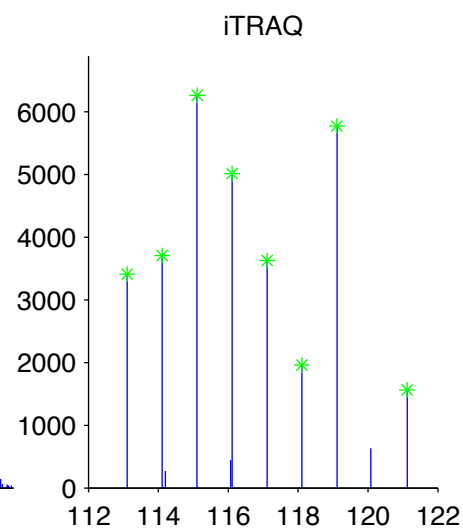

T L V Y G G I F L y P A N K K

fructose bisphosphatase 1

Charge State: +4

Scan Number: 7991

File Name: 090806ptp1blivers\_M\_NC2.raw

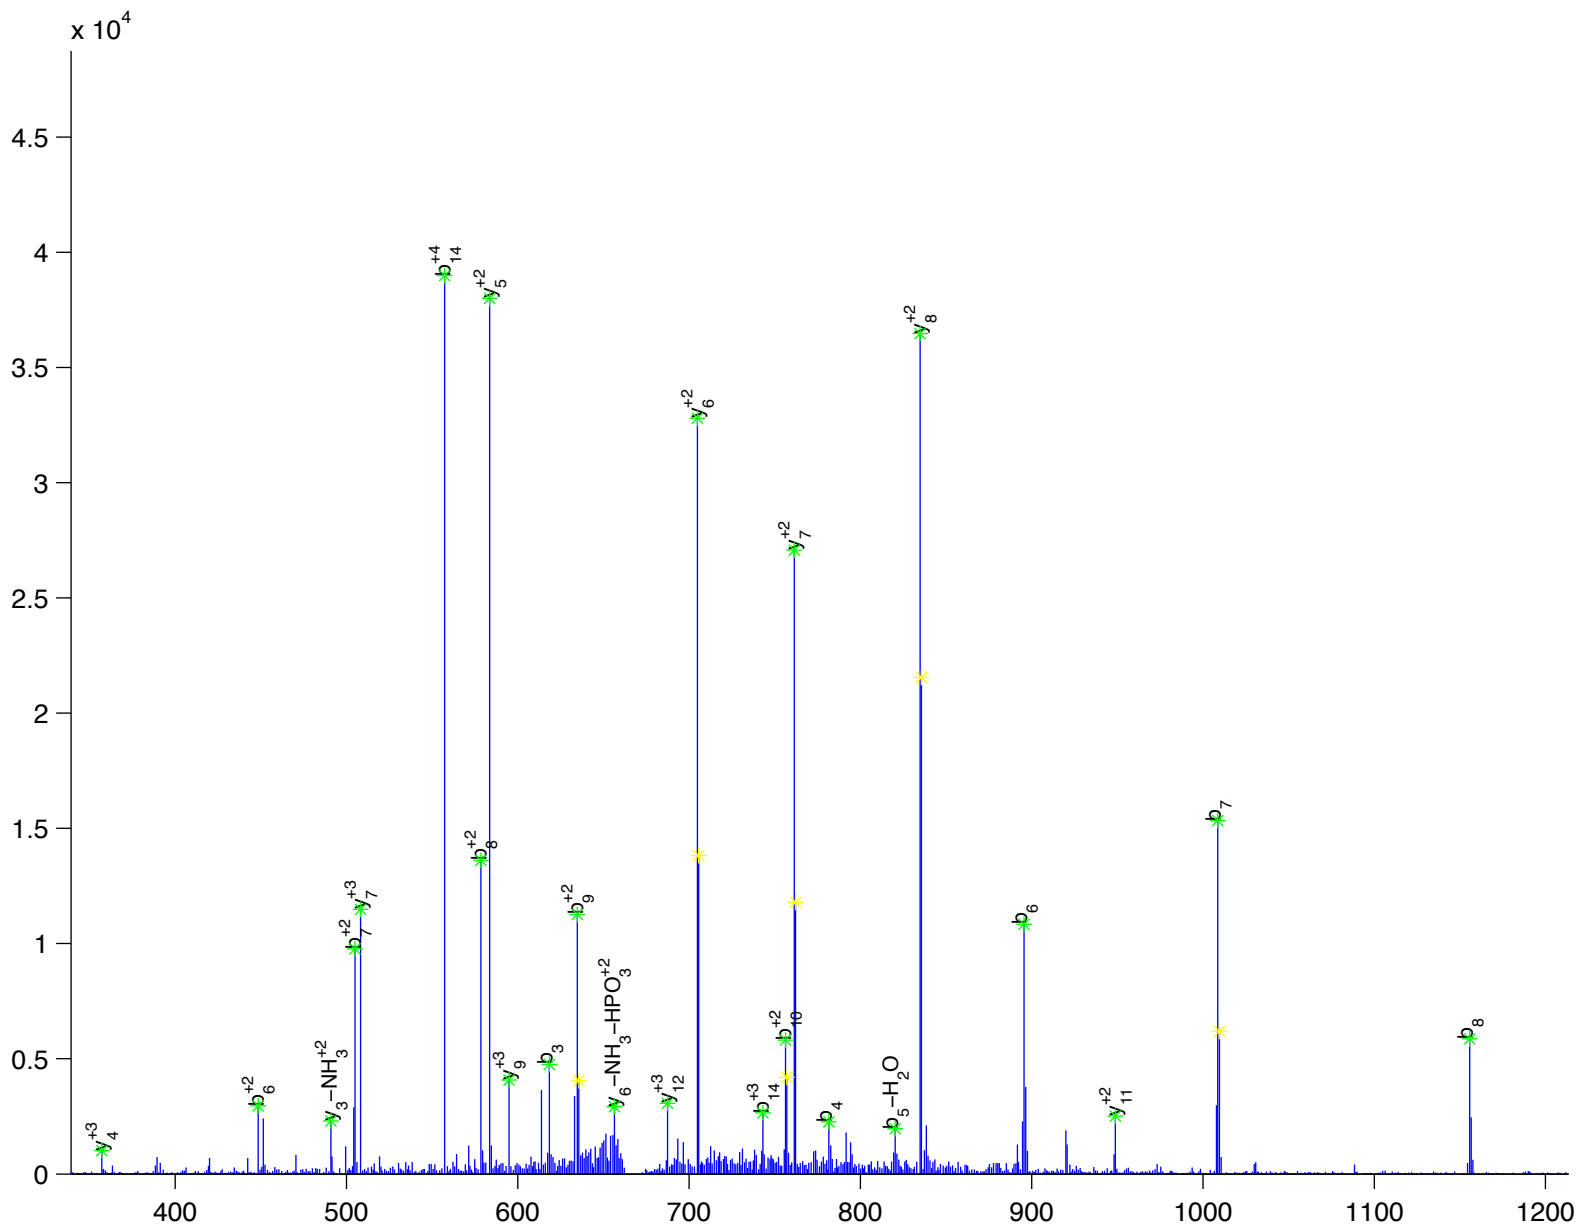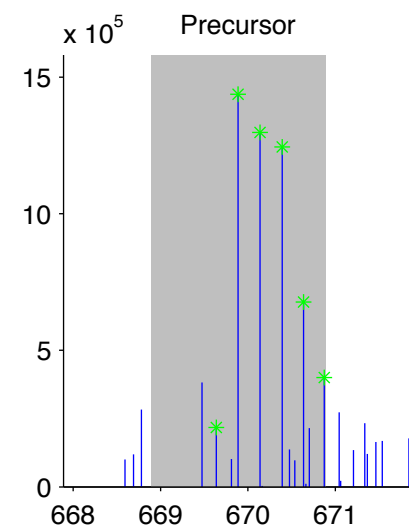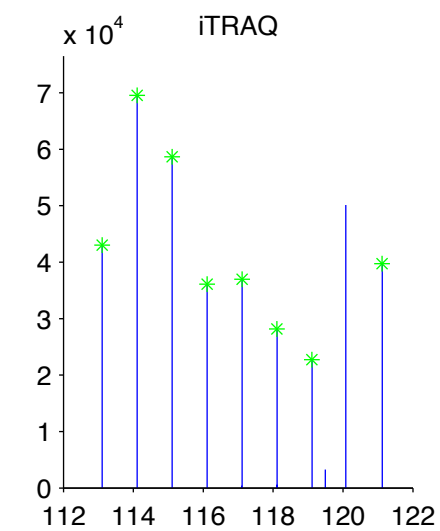

T L V Y G G I F L y P A N K

fructose biphosphatase 1

Charge State: +3

Scan Number: 8074

File Name: 091130ptp1blivers\_hfd\_basal2.raw

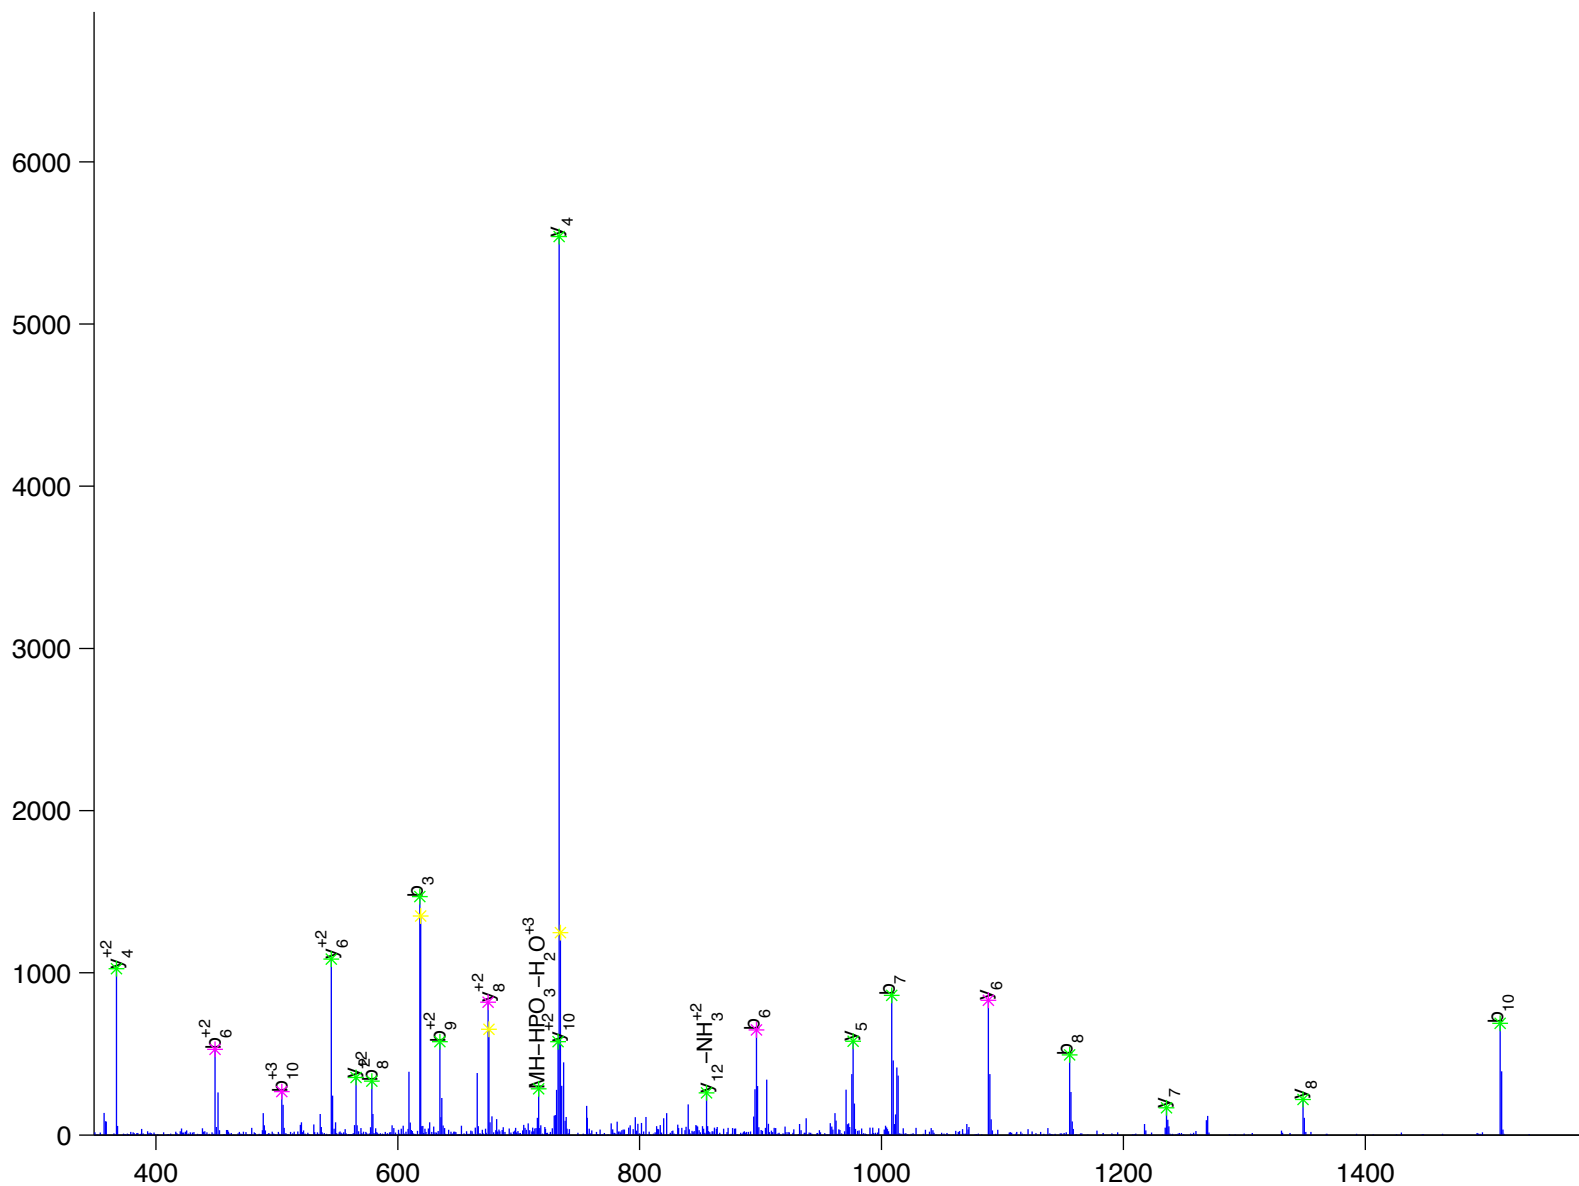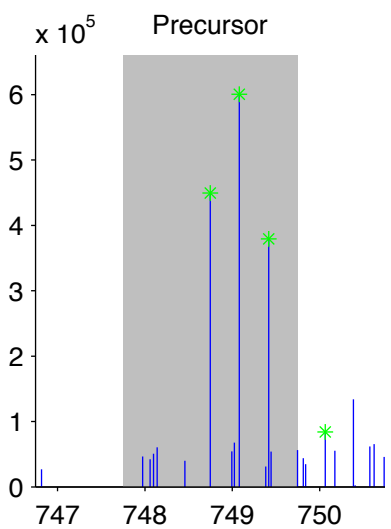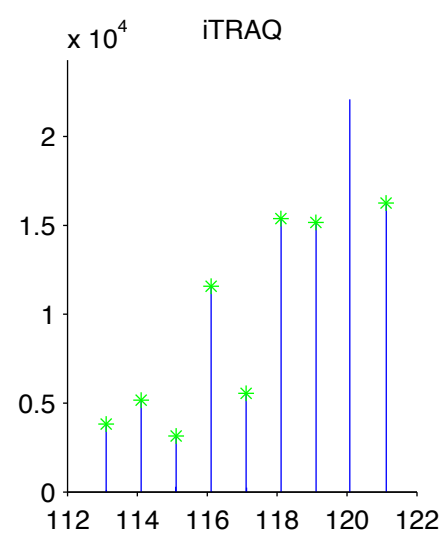



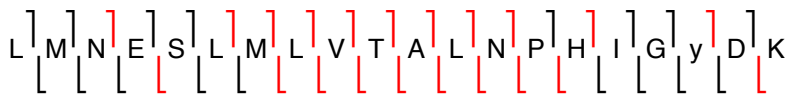

fumarate hydratase 1

Charge State: +4

Scan Number: 13295

File Name: 090807ptp1blivers\_M\_HFD\_basal.raw

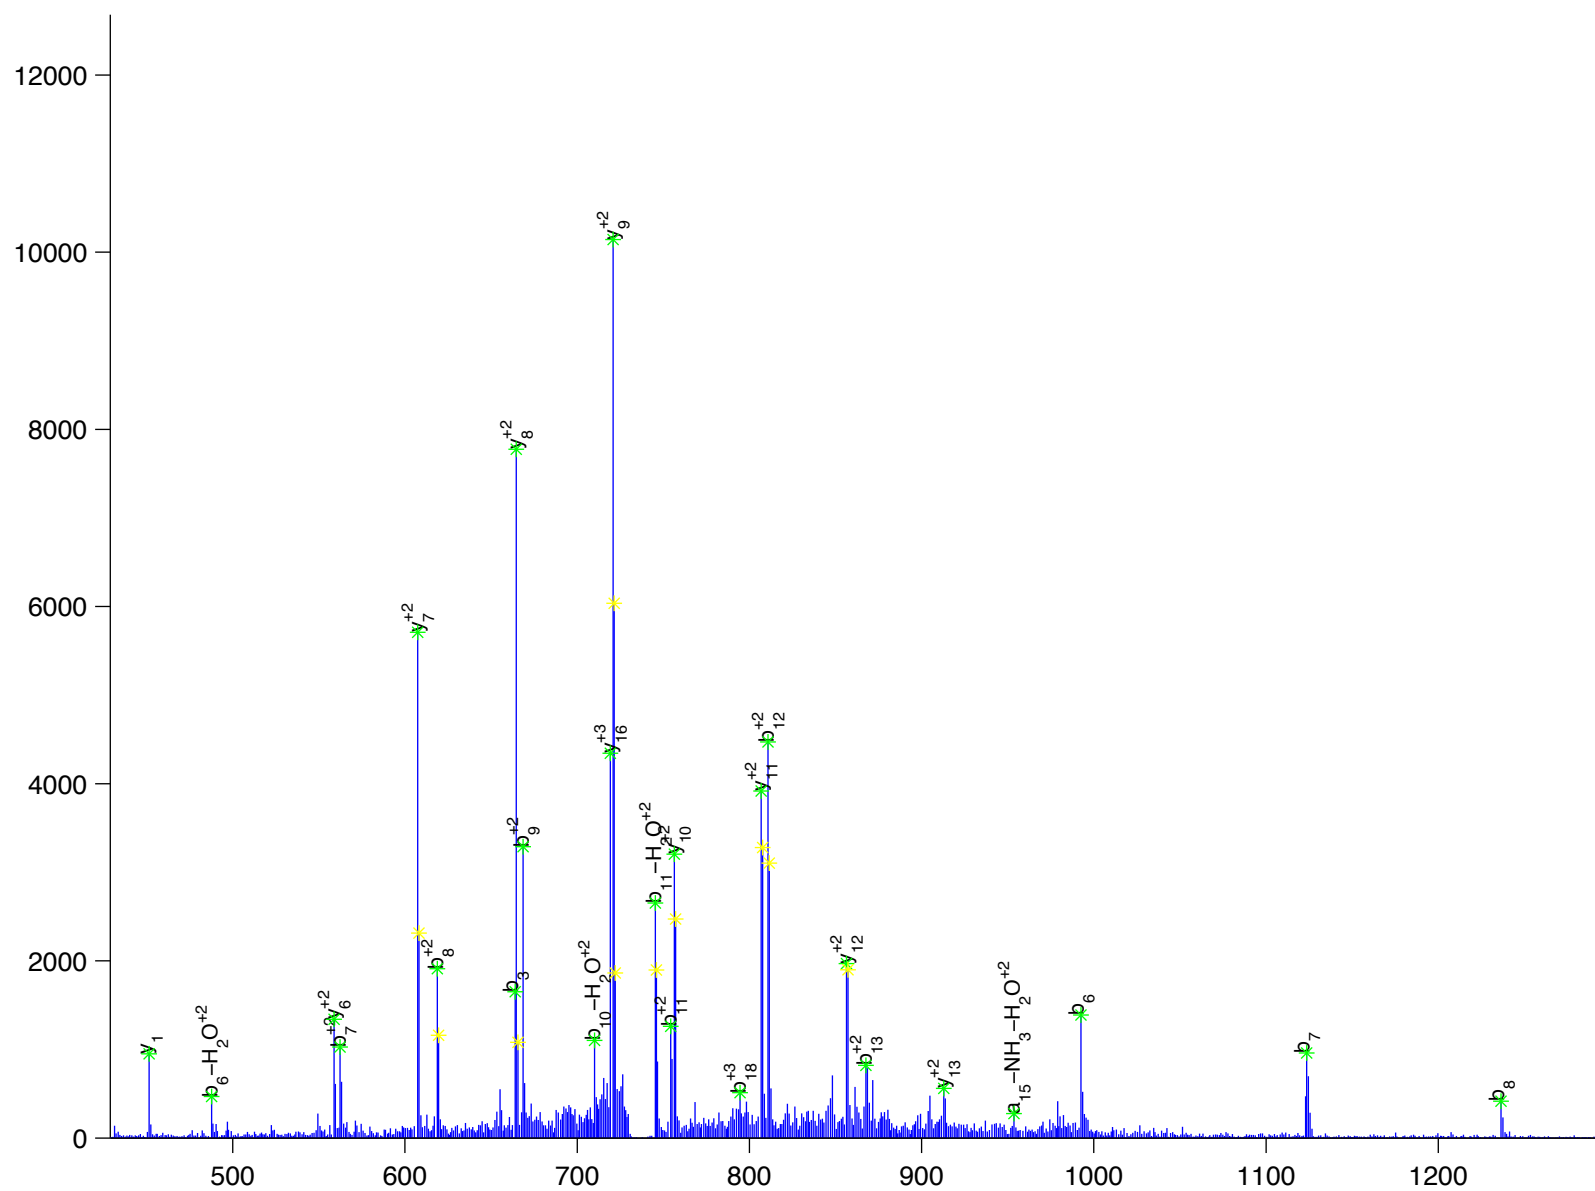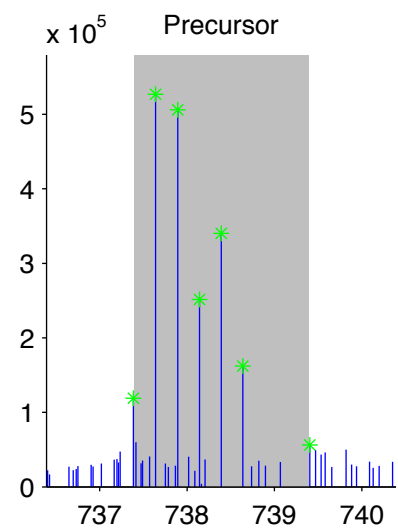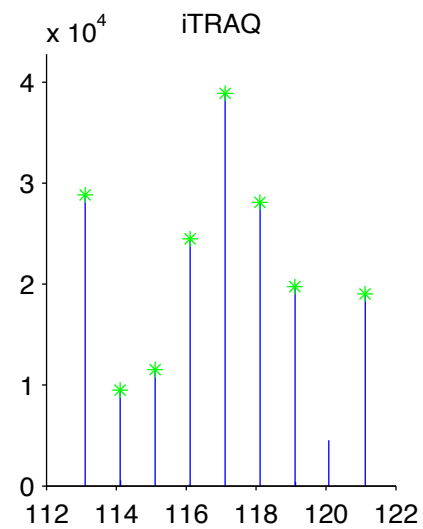

E T A I E L G y L T A E Q F D E W V K P K

fumarate hydratase 1

Charge State: +5

Scan Number: 4736

File Name: HJ072909\_HFD\_E1\_2.raw

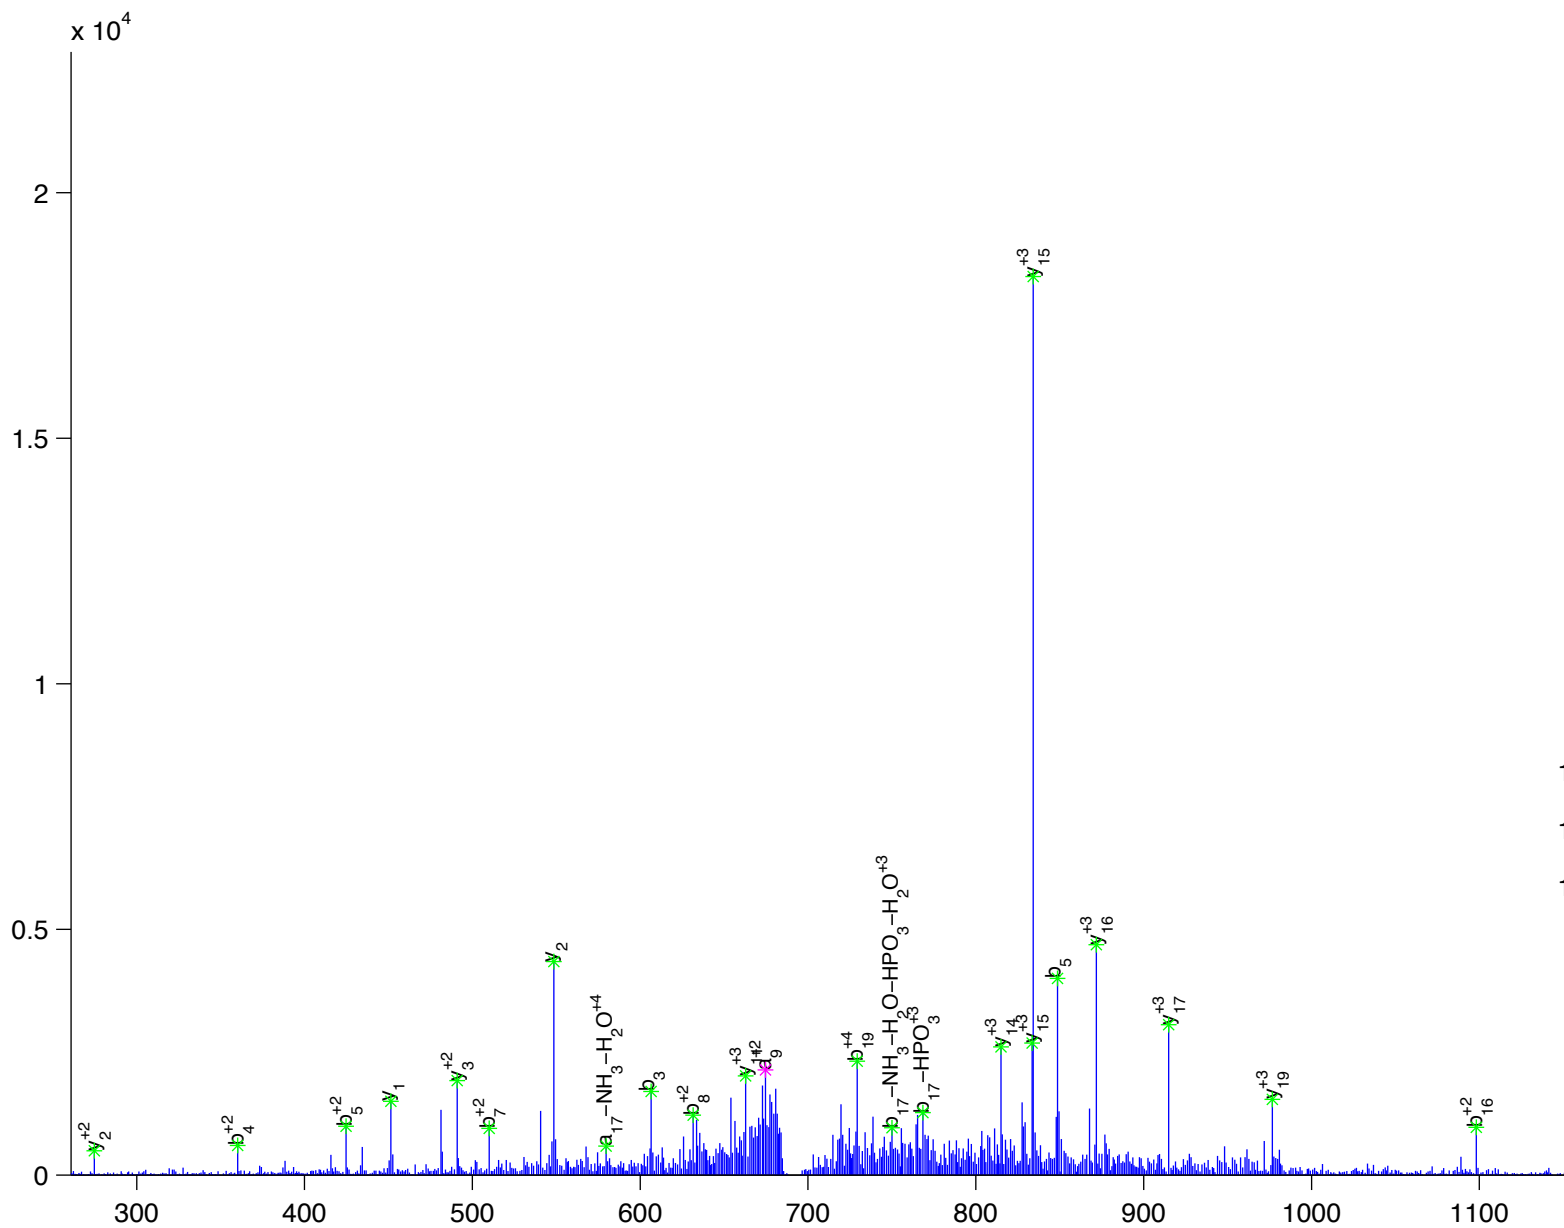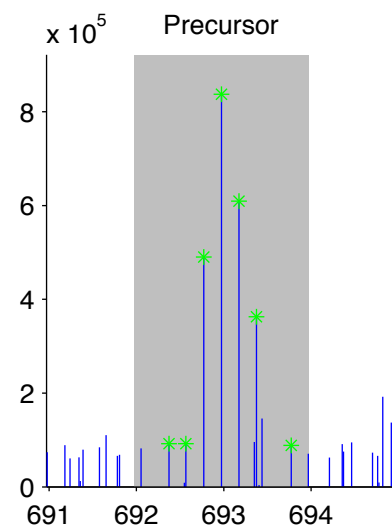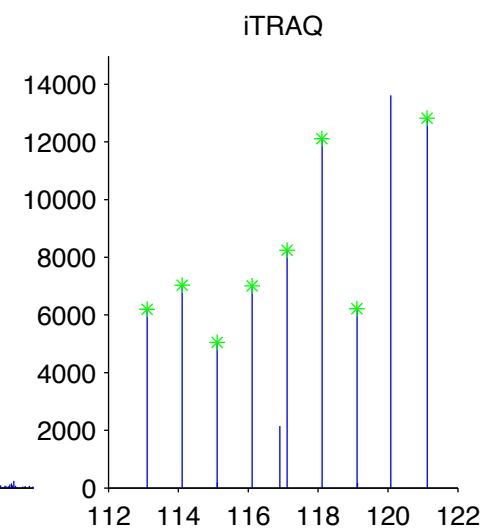

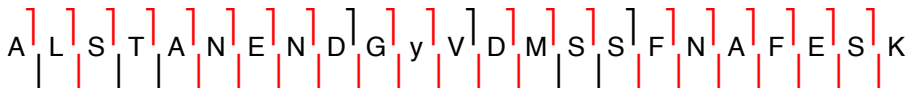

FYVE, RhoGEF and PH domain containing 5

Charge State: +4

Scan Number: 5402

File Name: 100908ptp1blivers\_ncHFD3\_basal.raw

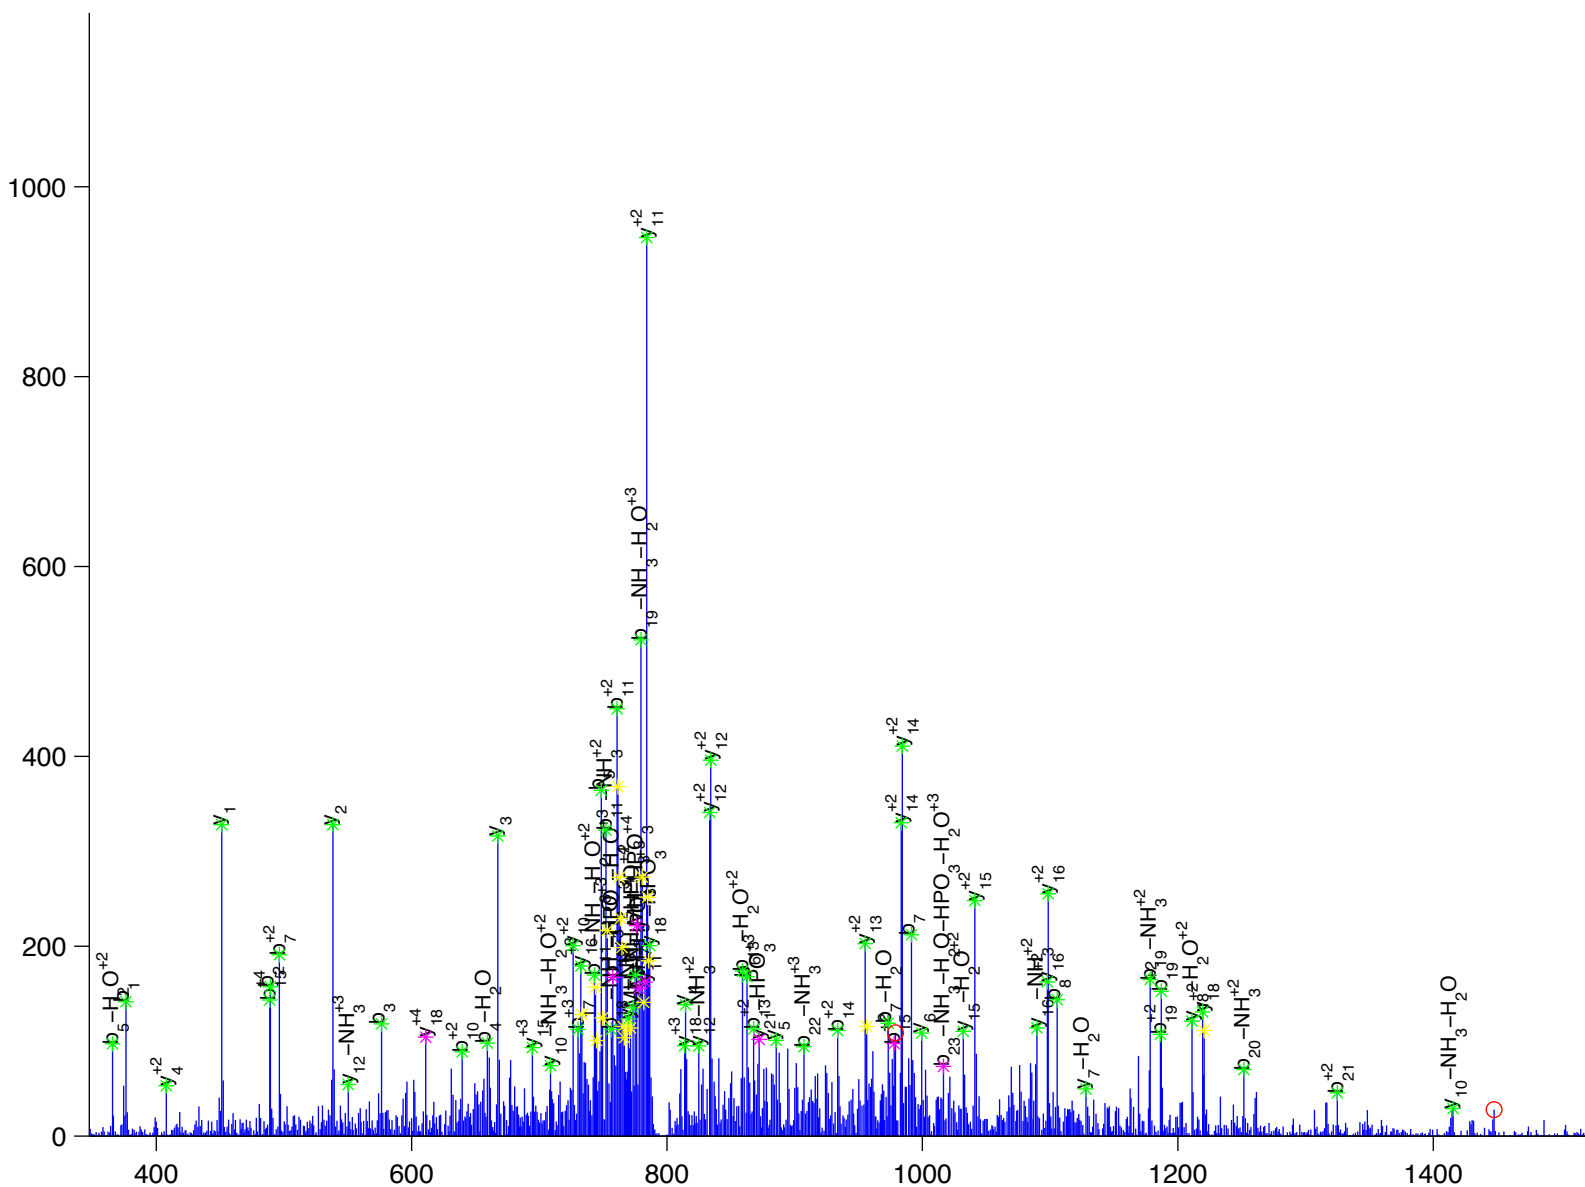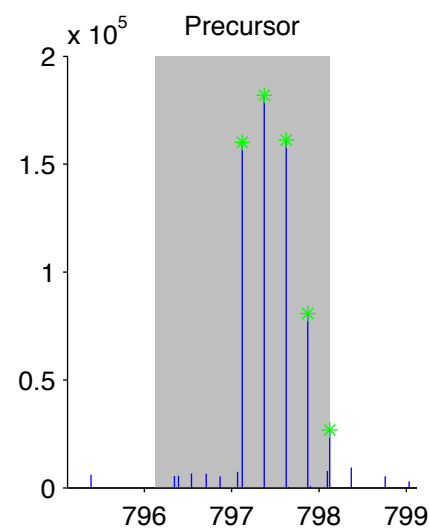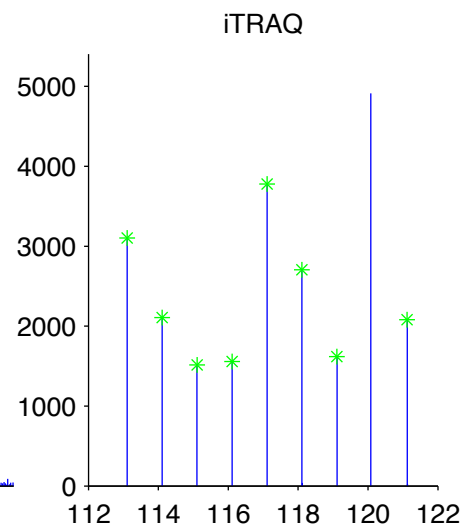

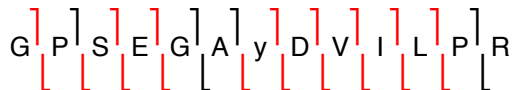

G protein-coupled receptor, family C, group 5, member C

Charge State: +2

Scan Number: 6150

File Name: 090806ptp1blivers\_M\_NC2.raw

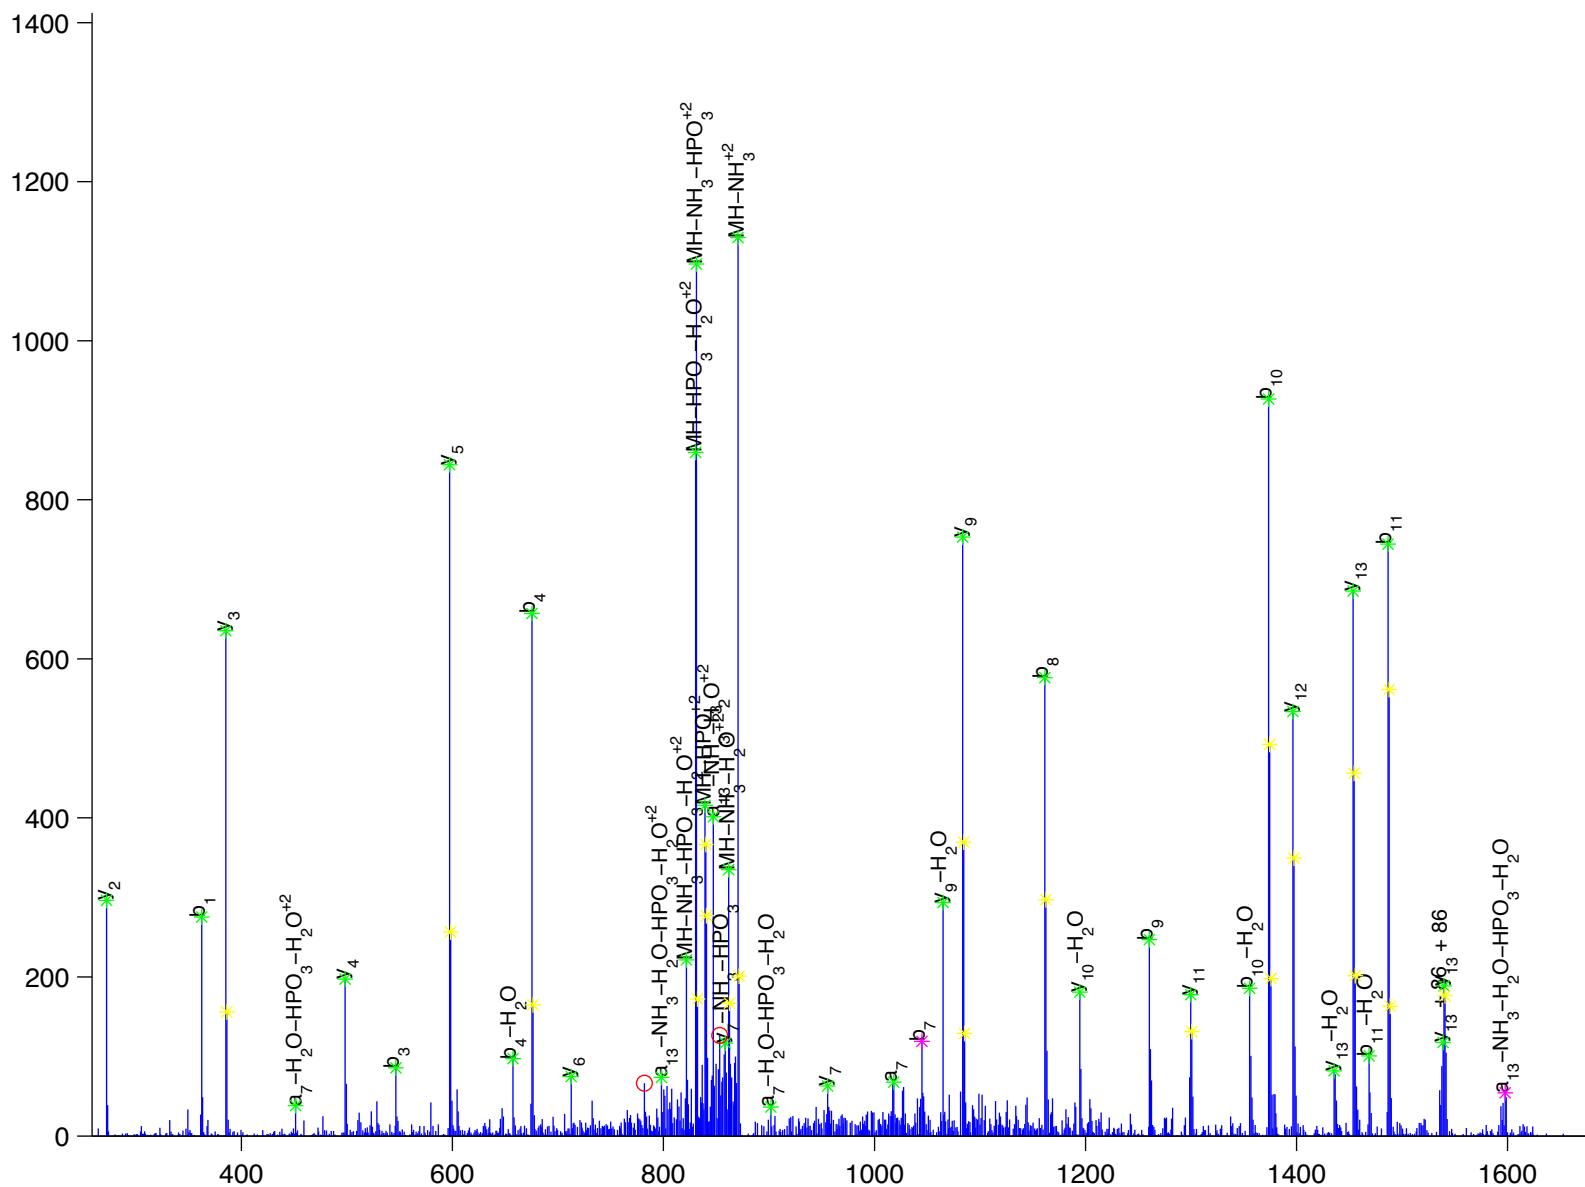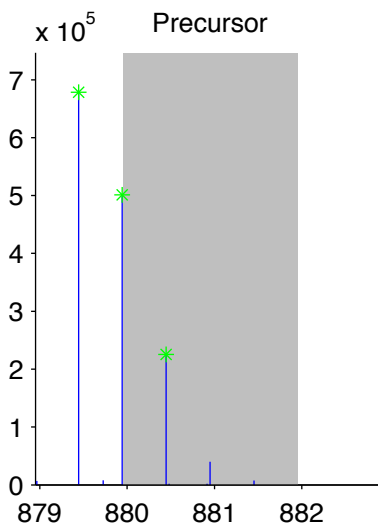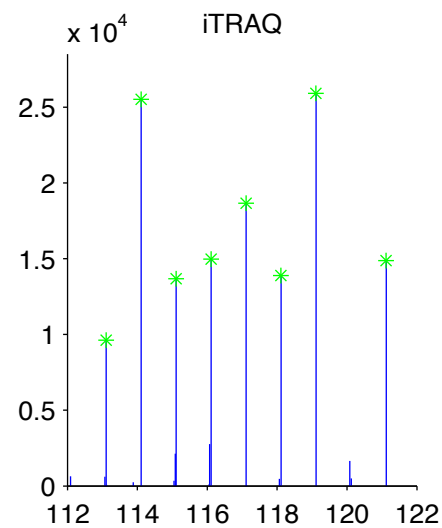

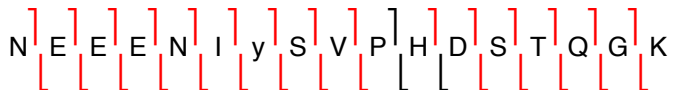

glucocorticoid receptor DNA binding factor 1

Charge State: +4

Scan Number: 4181

File Name: 091130ptp1blivers\_hfd\_basal2.raw

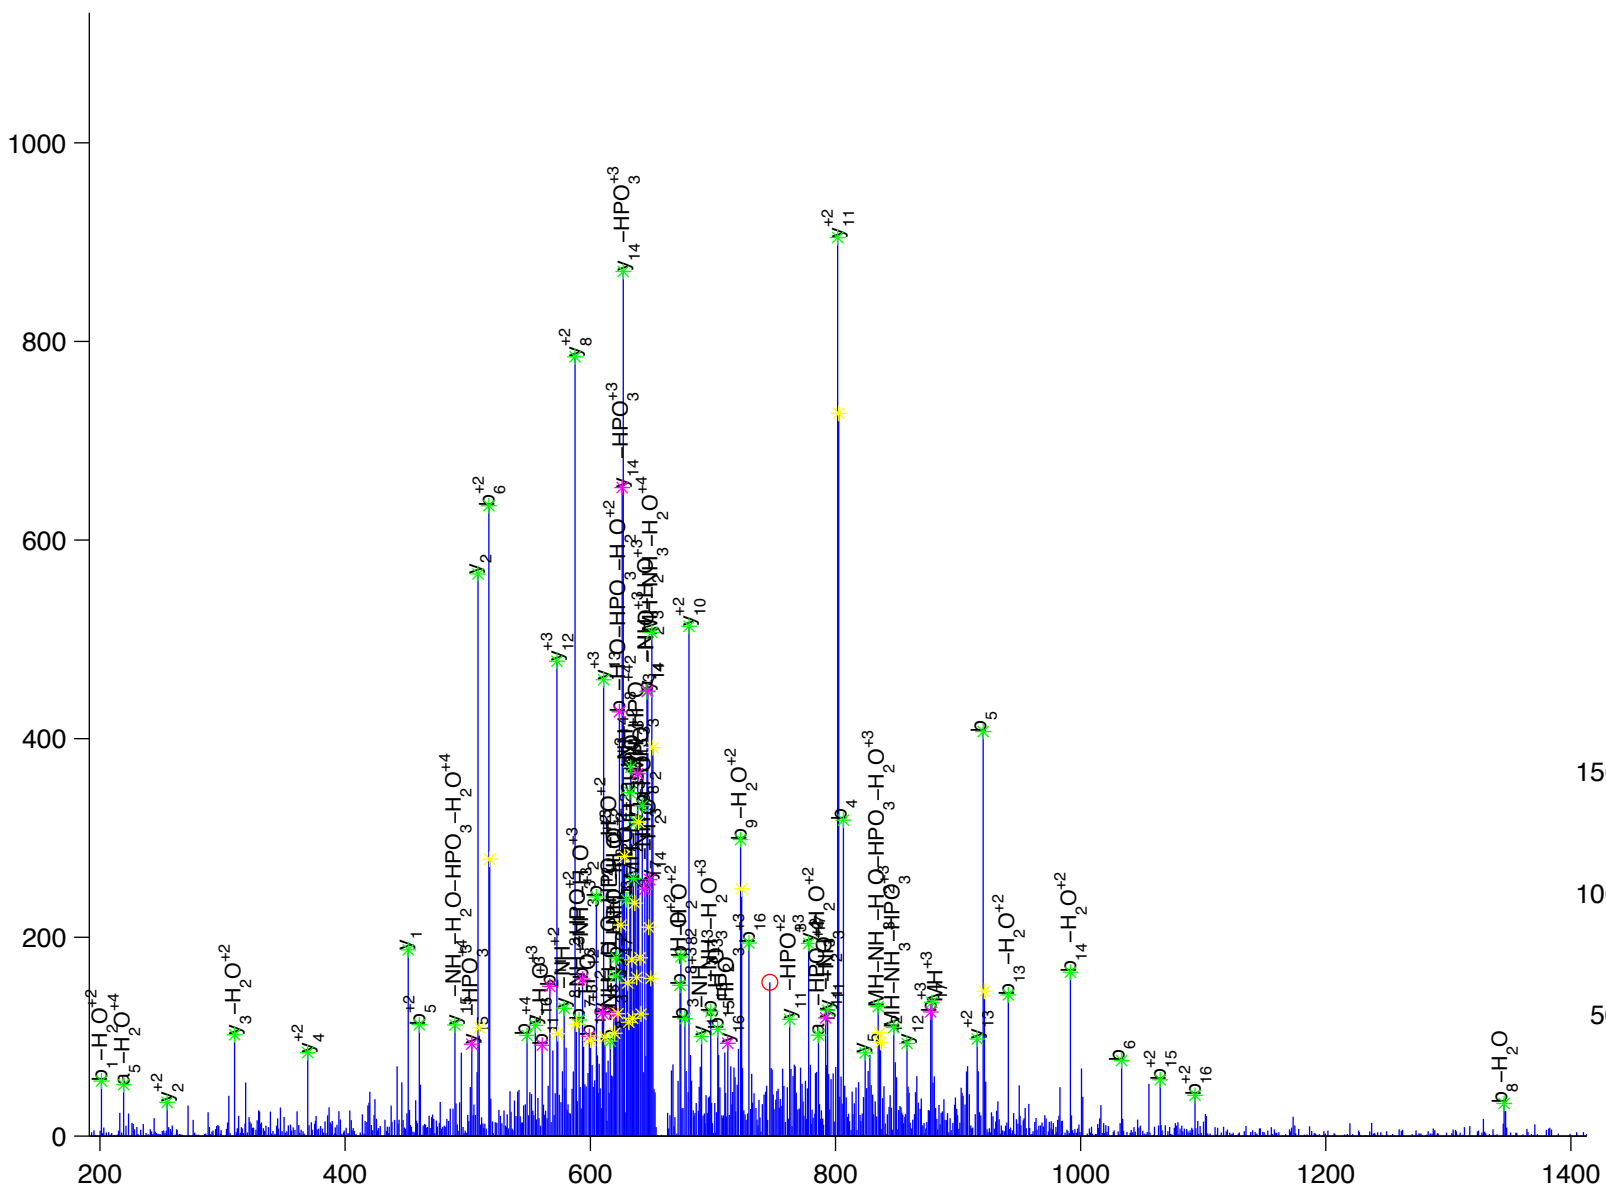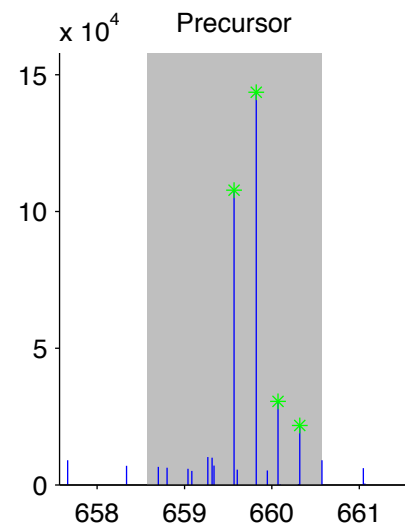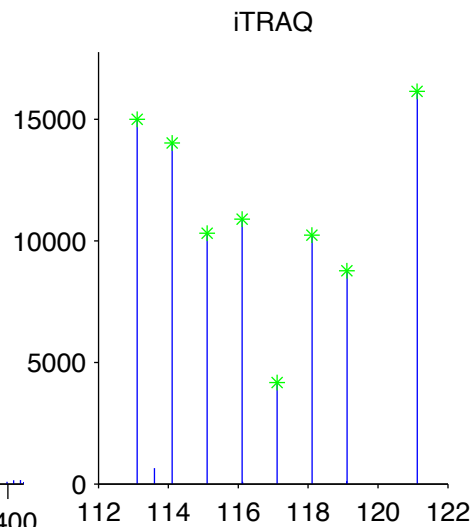

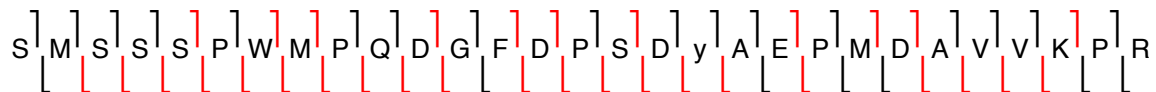

glucocorticoid receptor DNA binding factor 1

Charge State: +3

Scan Number: 6149

File Name: 090728ptp1blivers\_M\_NC\_ins\_e.raw

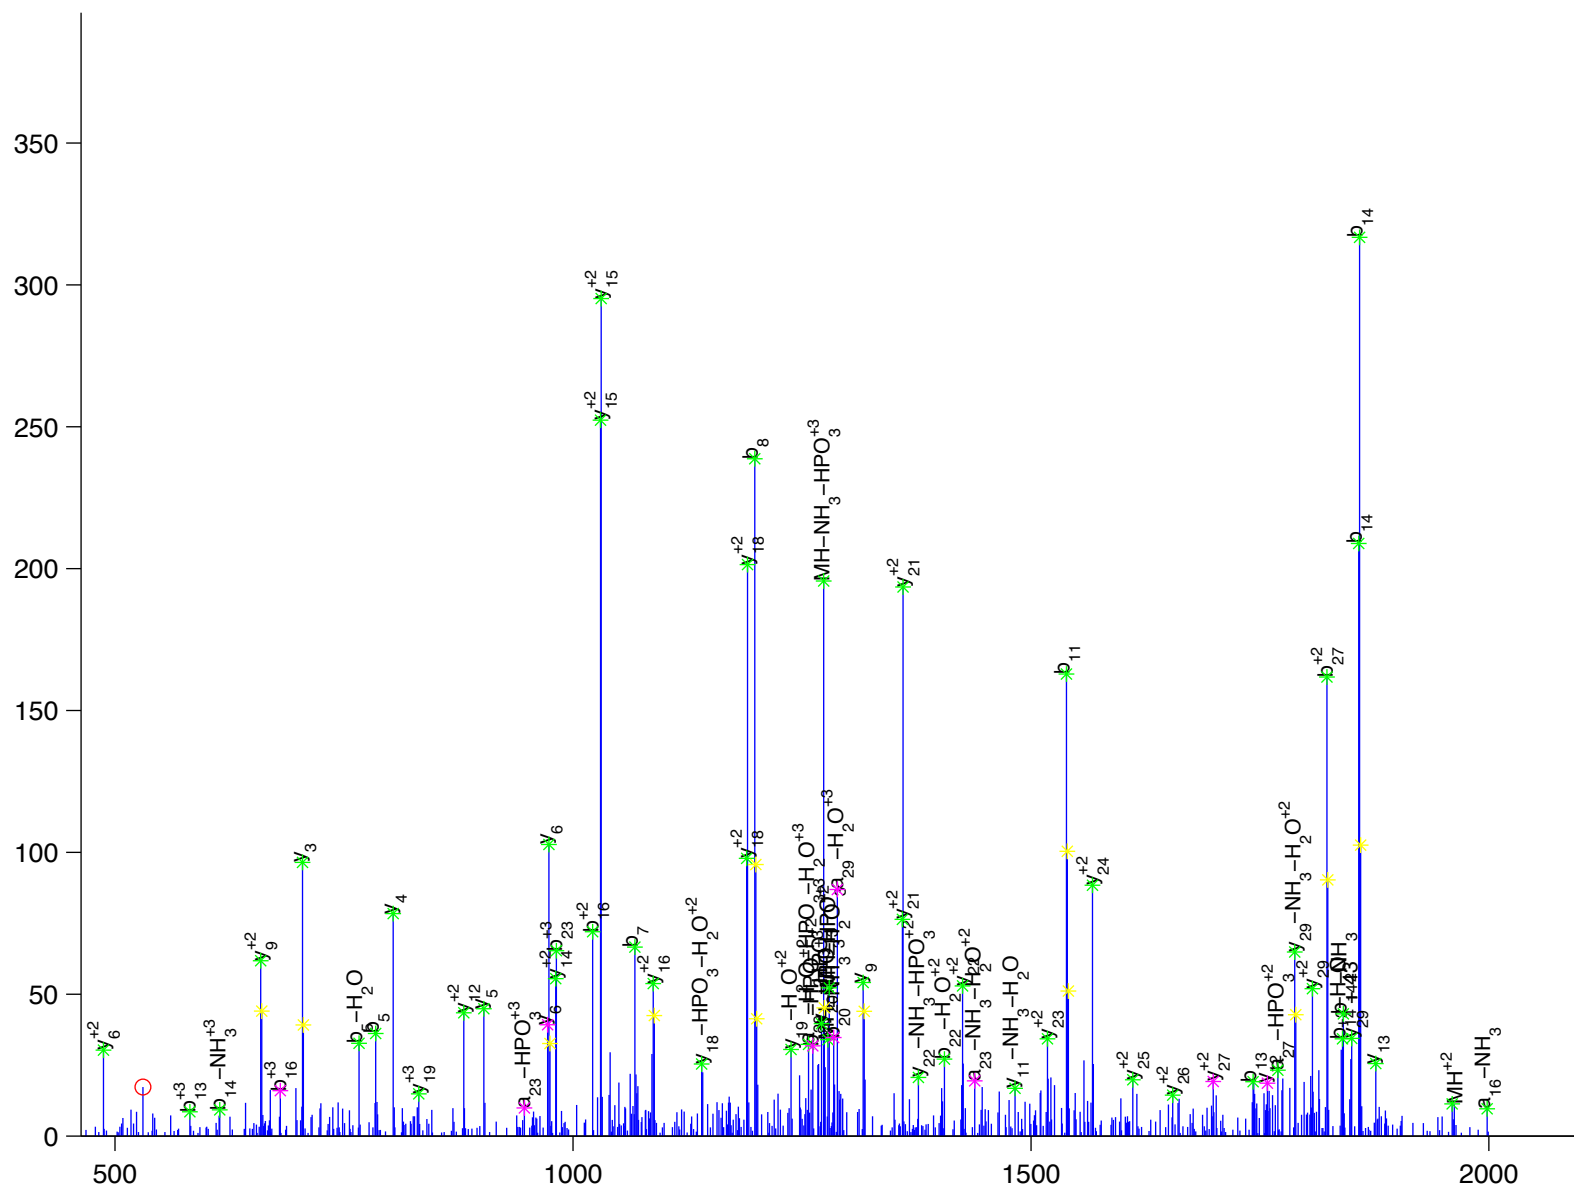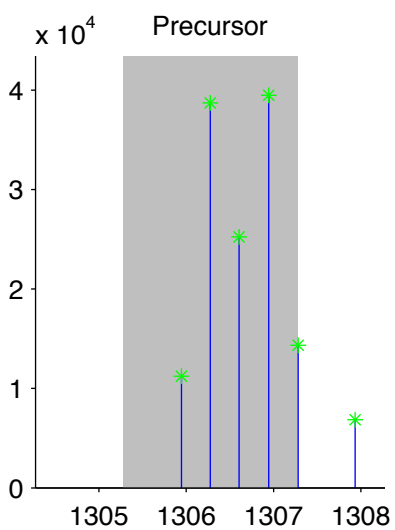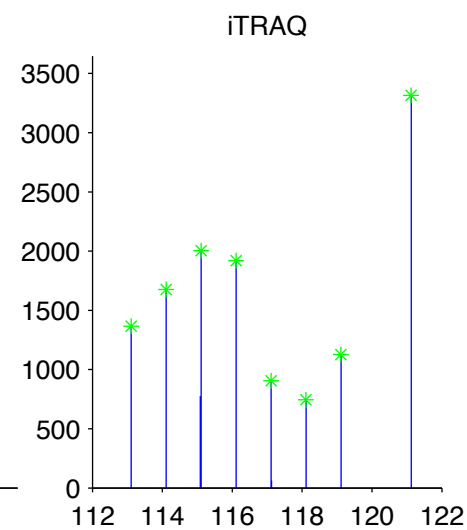

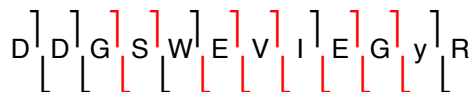

glutamate dehydrogenase 1

Charge State: +3

Scan Number: 4595

File Name: 100827ptp1blivers\_ncHFD\_basal.raw

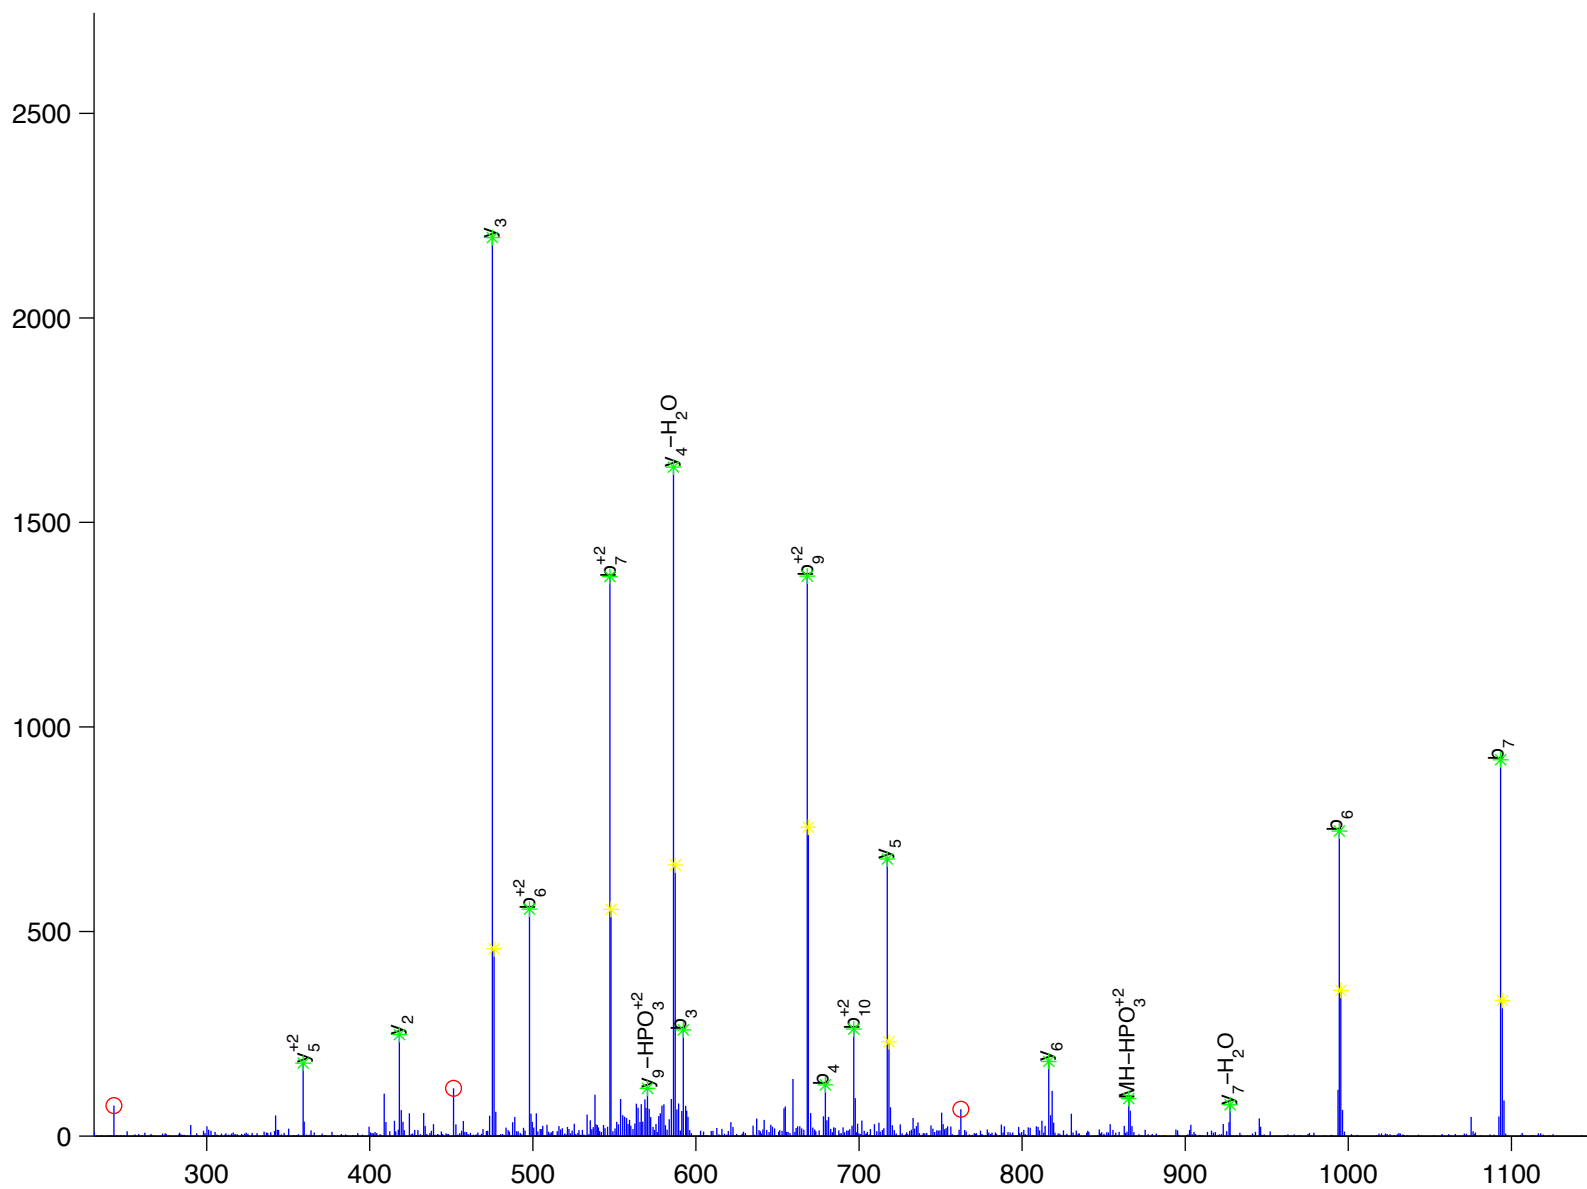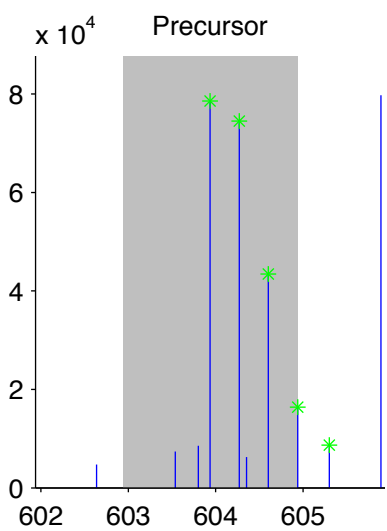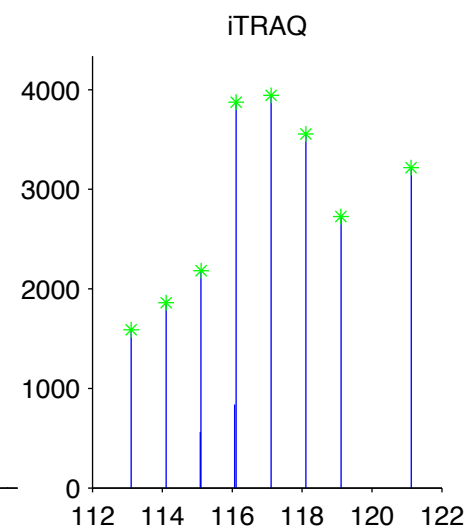

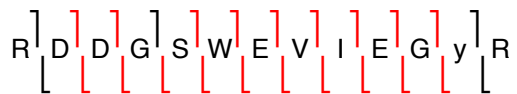

glutamate dehydrogenase 1

Charge State: +3

Scan Number: 5528

File Name: 100908ptp1blivers\_ncHFD3\_basal.raw

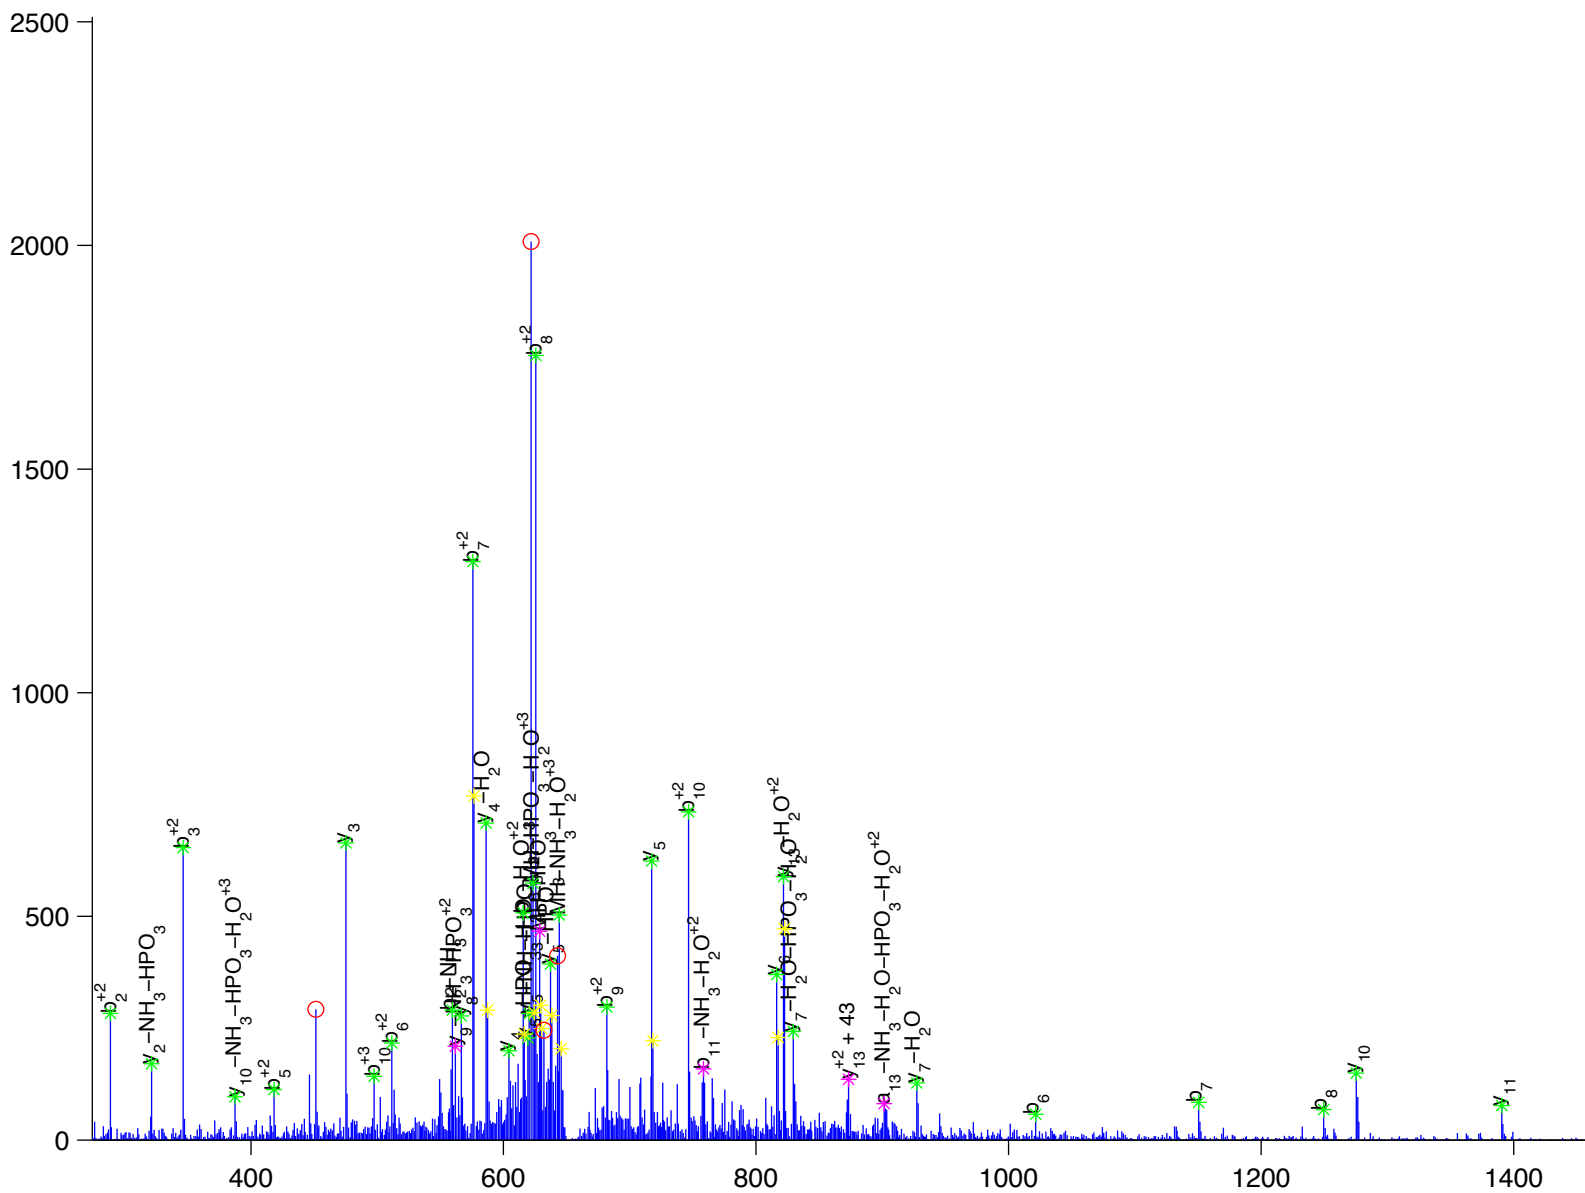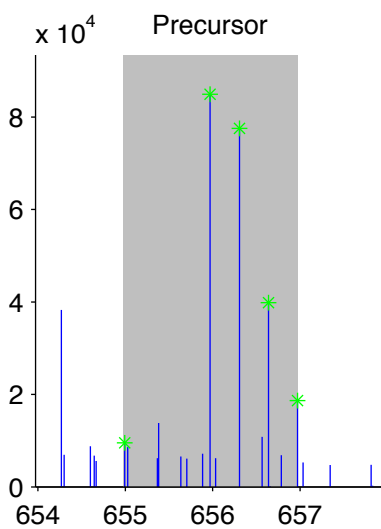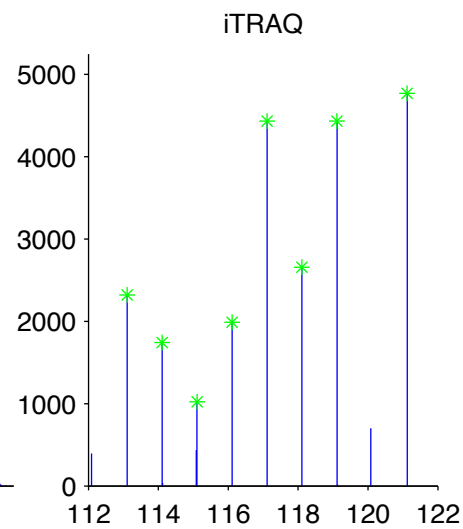



D I V H S G L A y T M E R

glutamate dehydrogenase 1

Charge State: +2

Scan Number: 6952

File Name: 090807ptp1blivers\_M\_HFD\_basal.raw

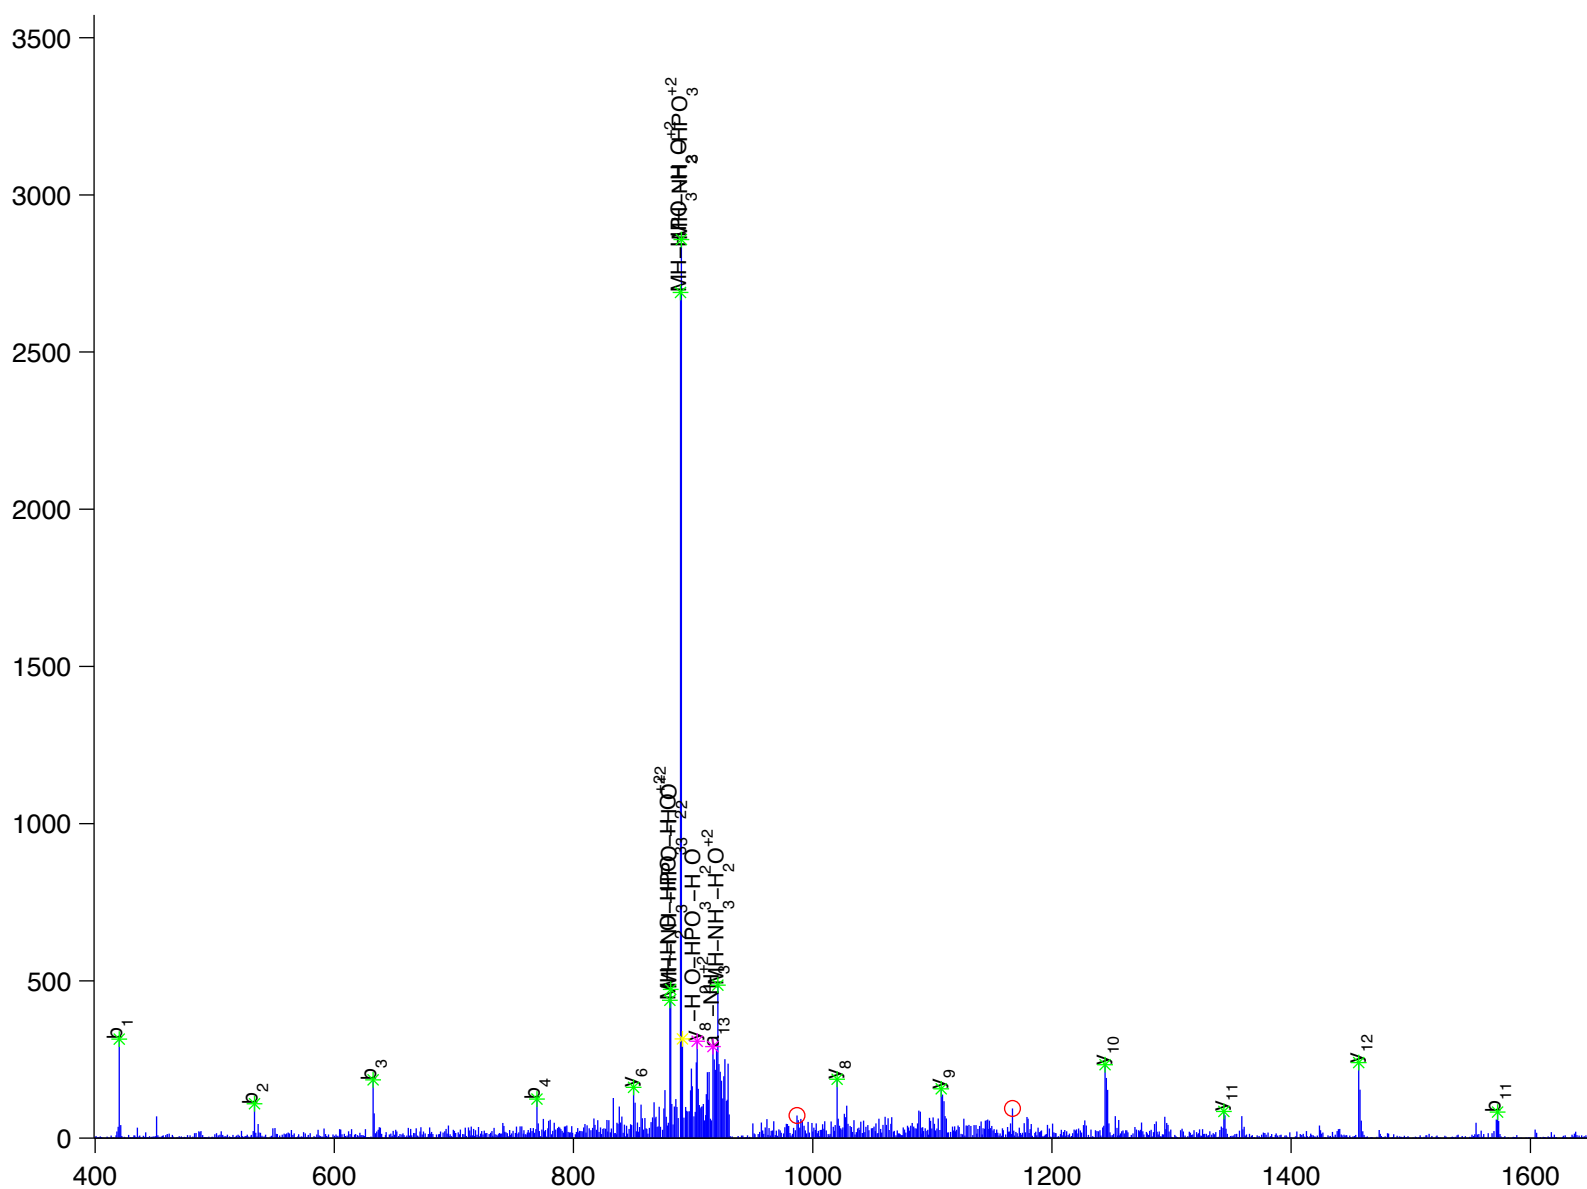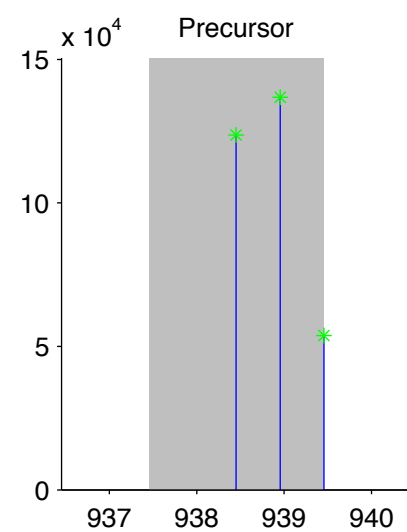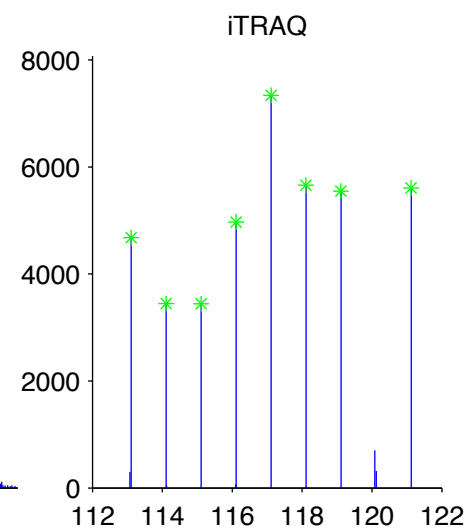

N F G L y N E R

glutamate oxaloacetate transaminase 1, soluble

Charge State: +2

Scan Number: 5058

File Name: 091130ptp1blivers\_hfd\_basal2.raw

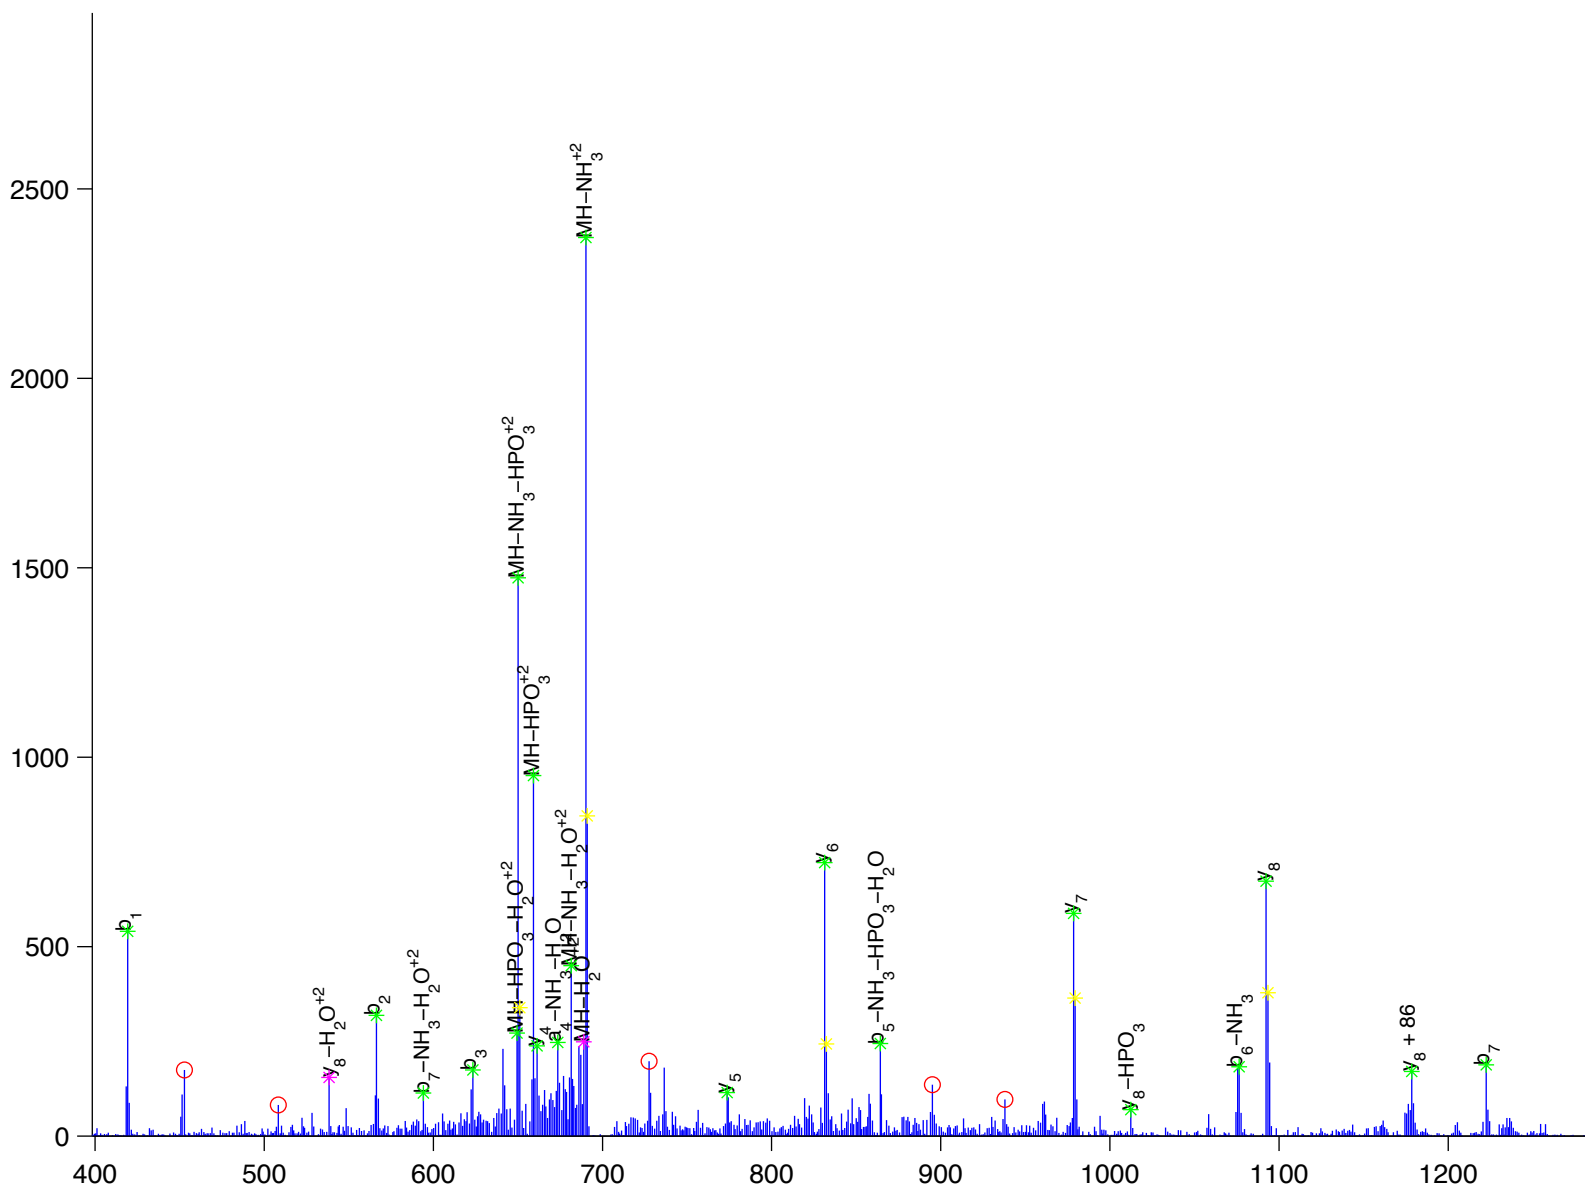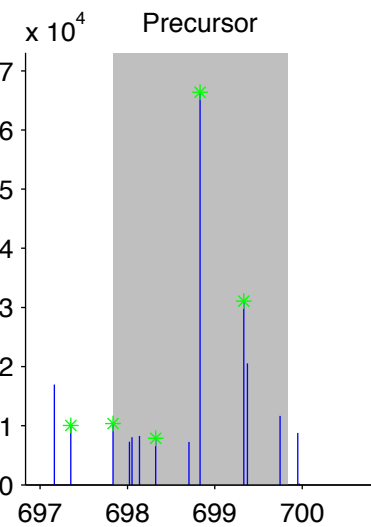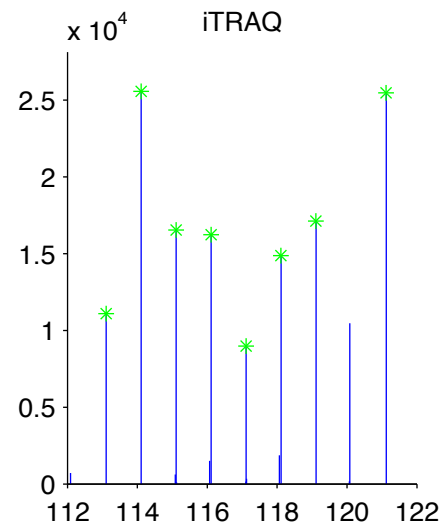

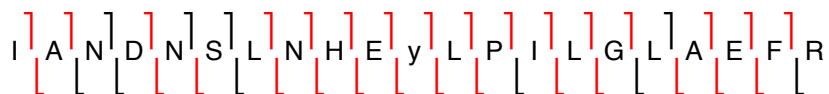

glutamate oxaloacetate transaminase 1, soluble

Charge State: +3

Scan Number: 7464

File Name: 090728ptp1blivers\_M\_NC\_ins\_e.raw

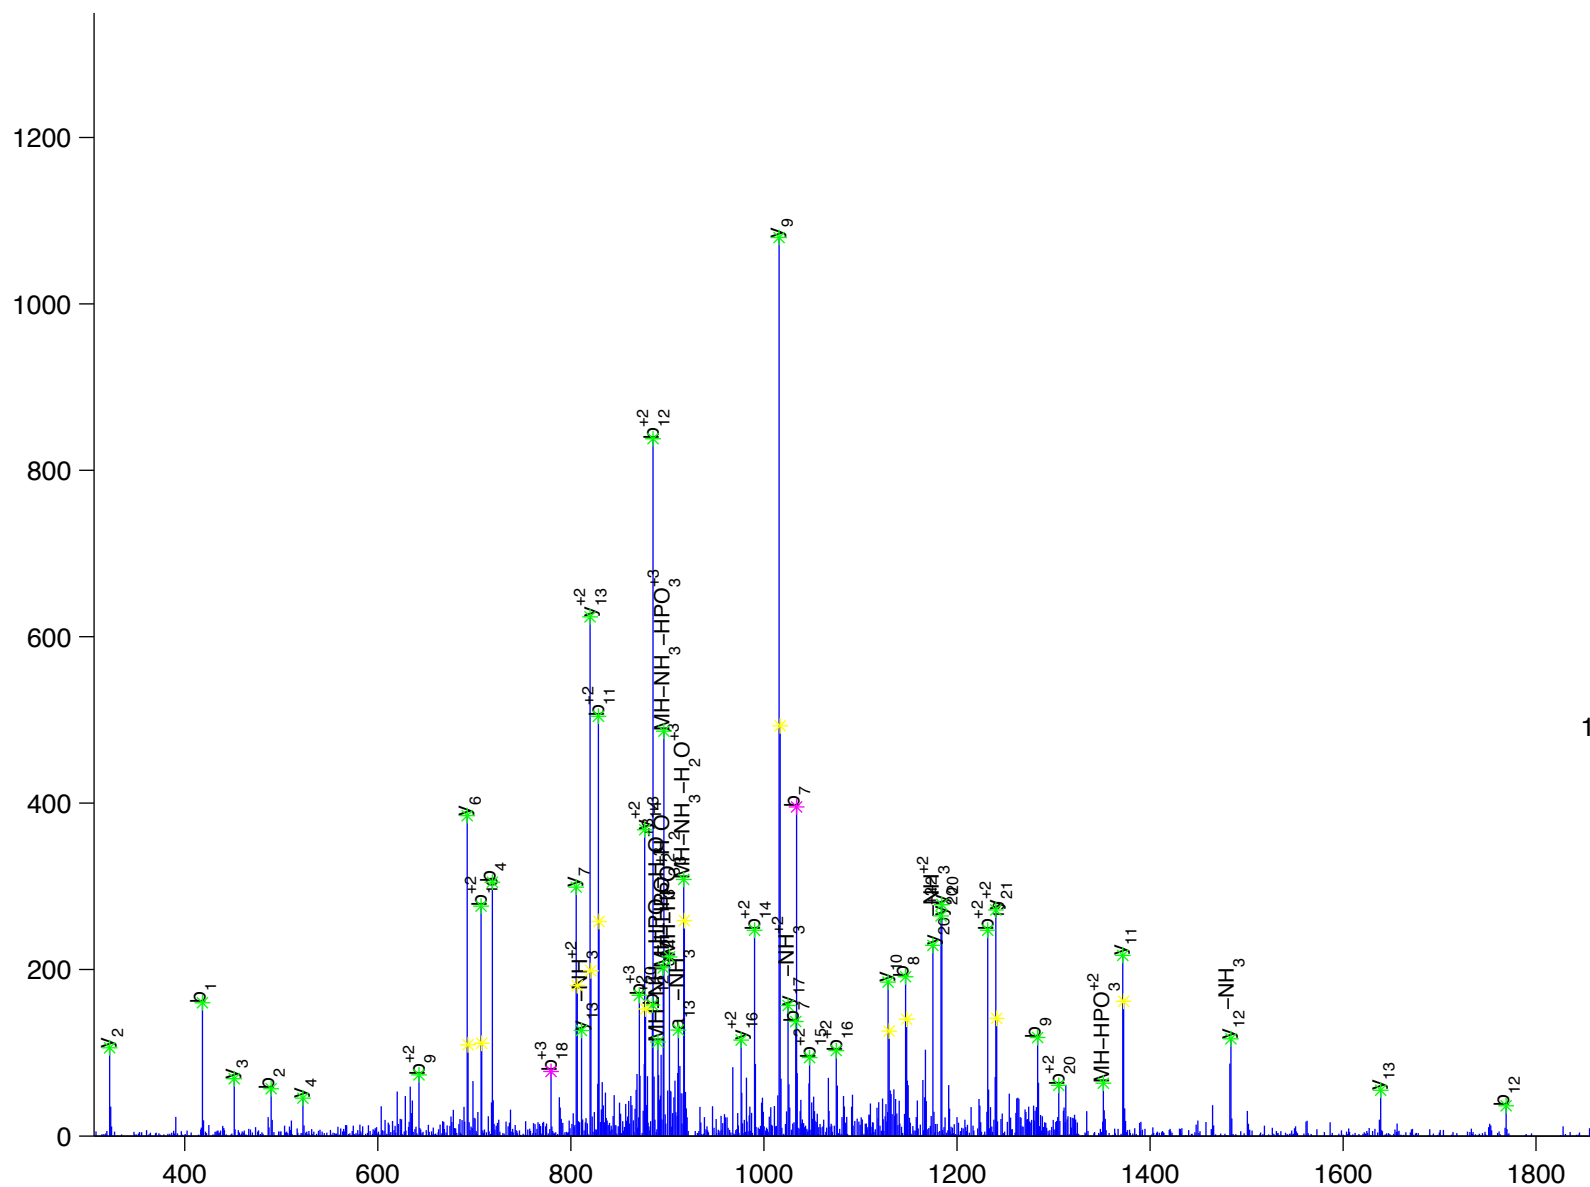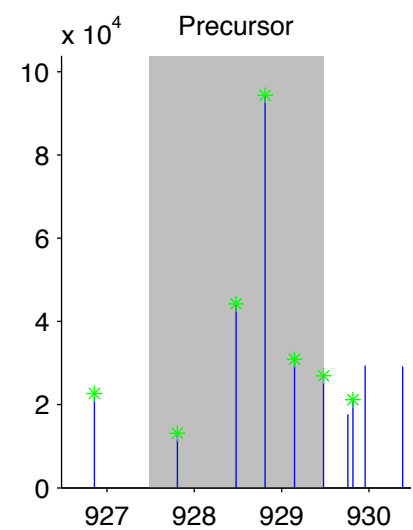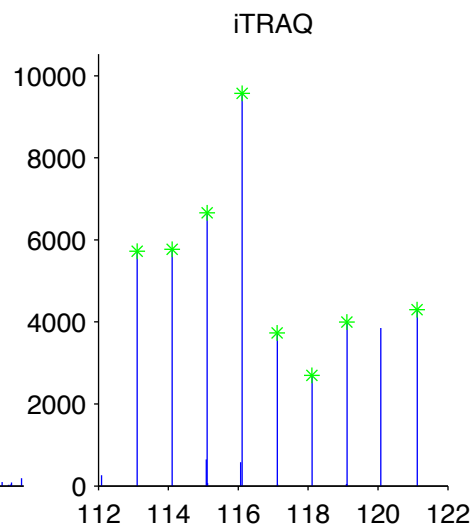

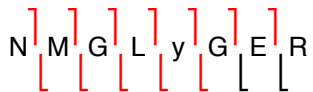

glutamate oxaloacetate transaminase 2, mitochondrial

Charge State: +2

Scan Number: 4344

File Name: 091130ptp1blivers\_hfd\_basal2.raw

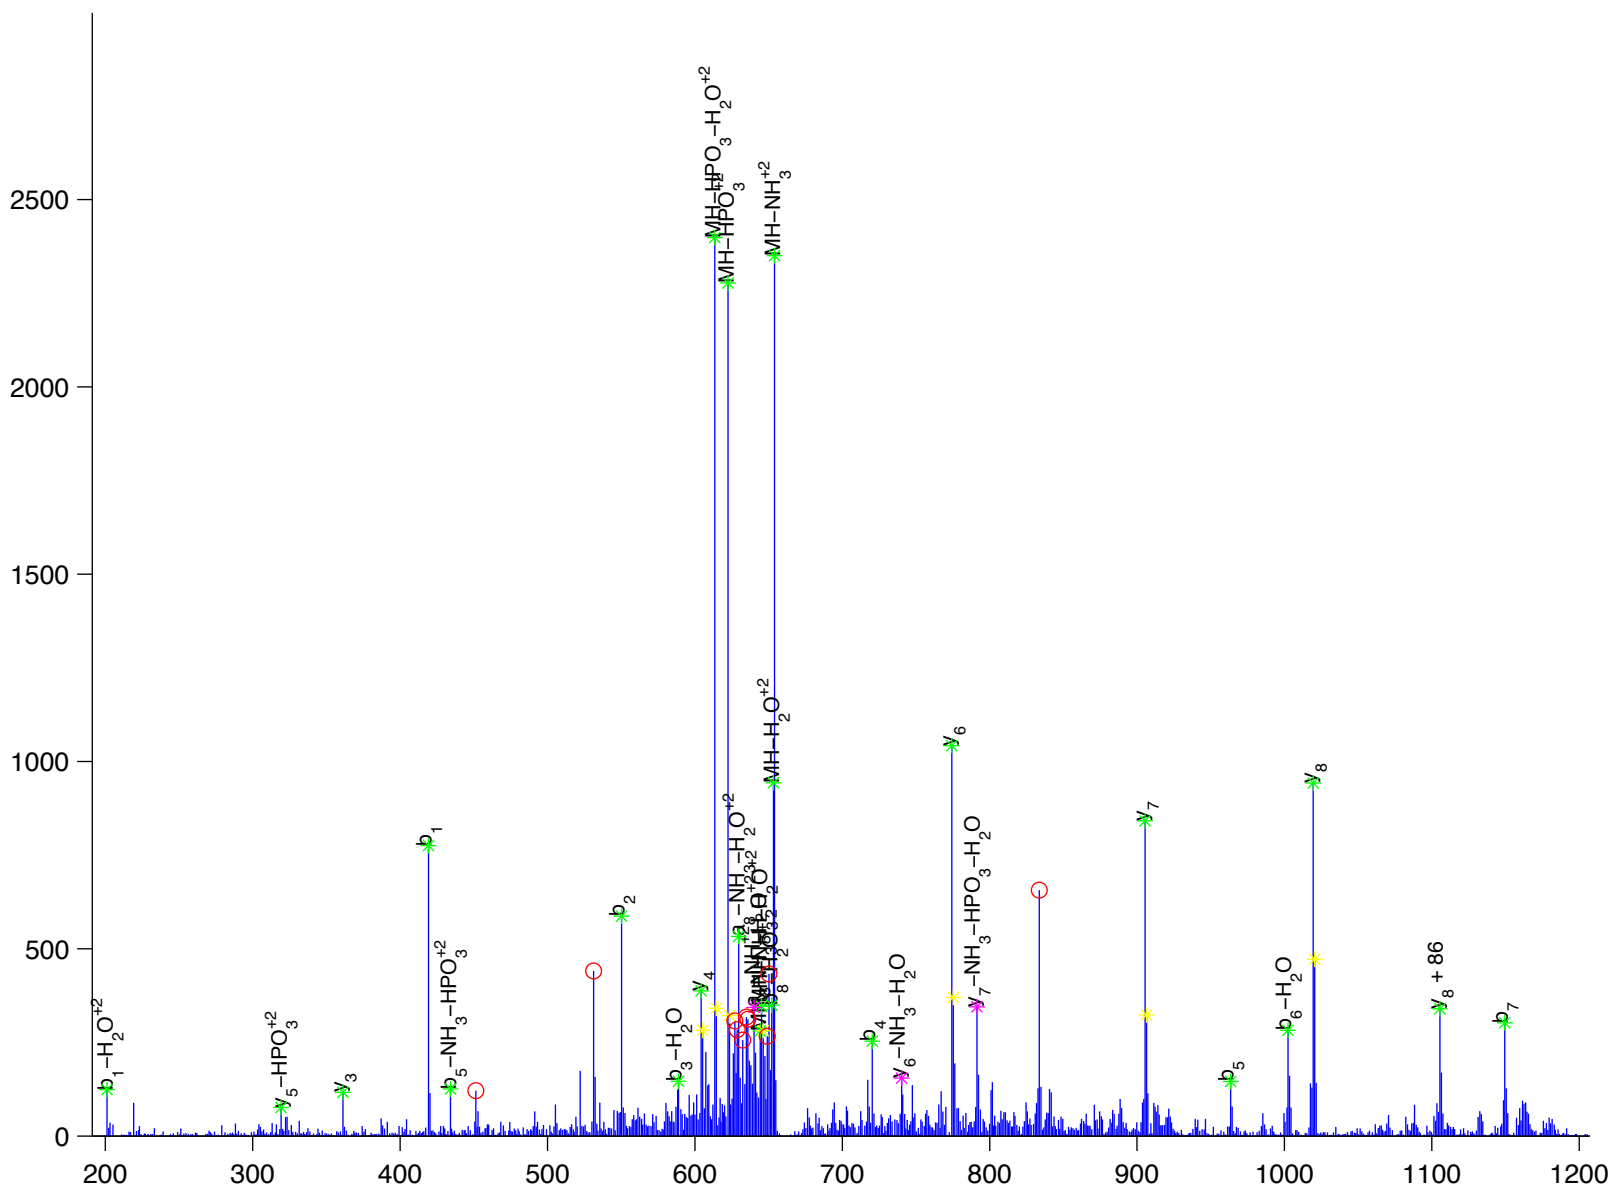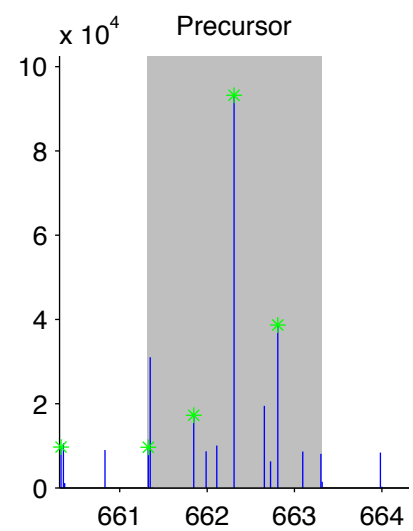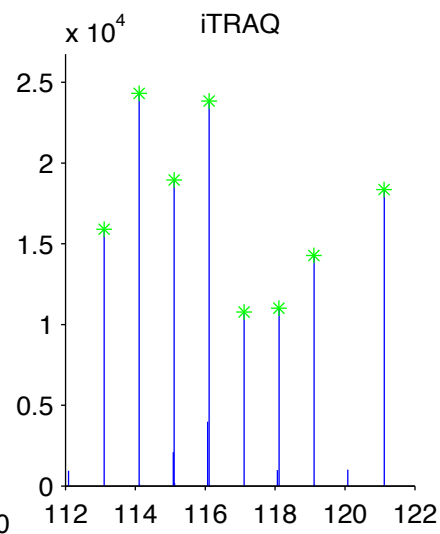

N L D K E y L P I G G L A E F C K

glutamate oxaloacetate transaminase 2, mitochondrial

Charge State: +4

Scan Number: 5402

File Name: 100827ptp1blivers\_ncHFD\_basal.raw

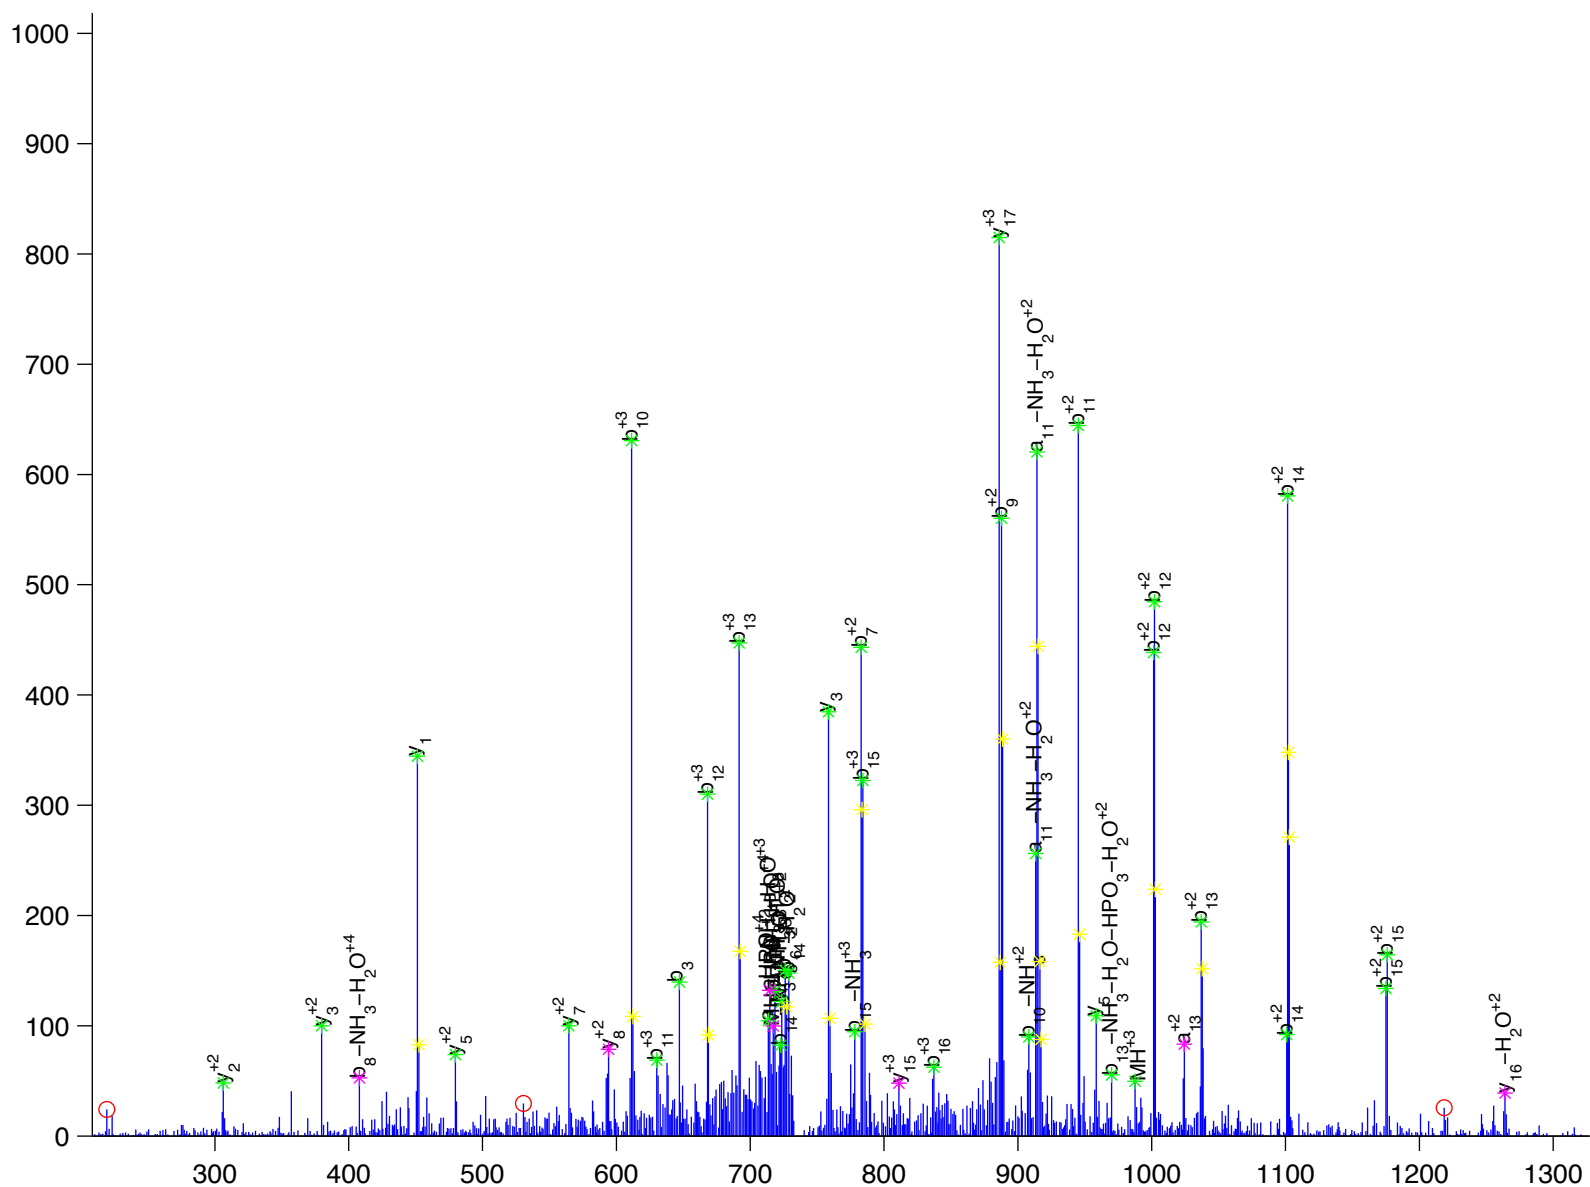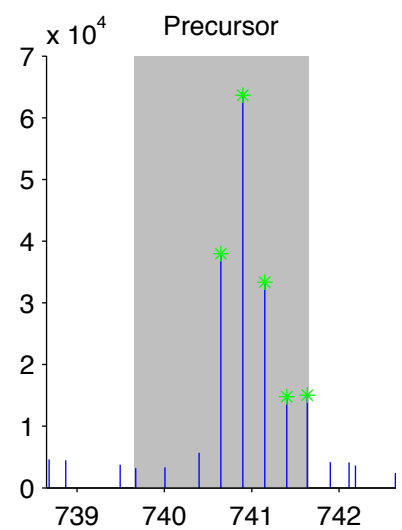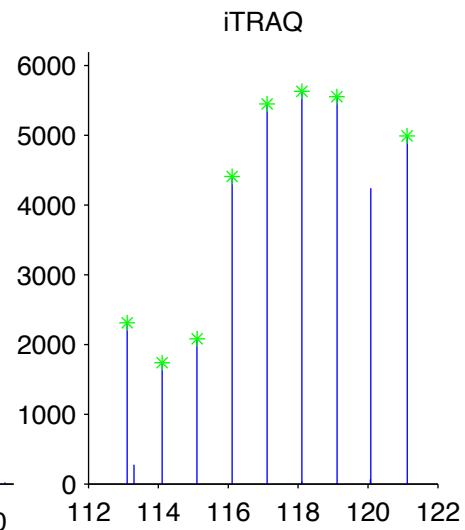

G [ y ] F [ E ] D [ R ]

glutamine synthetase

Charge State: +2

Scan Number: 3281

File Name: 100905ptp1blivers\_ncHFD\_basal.raw

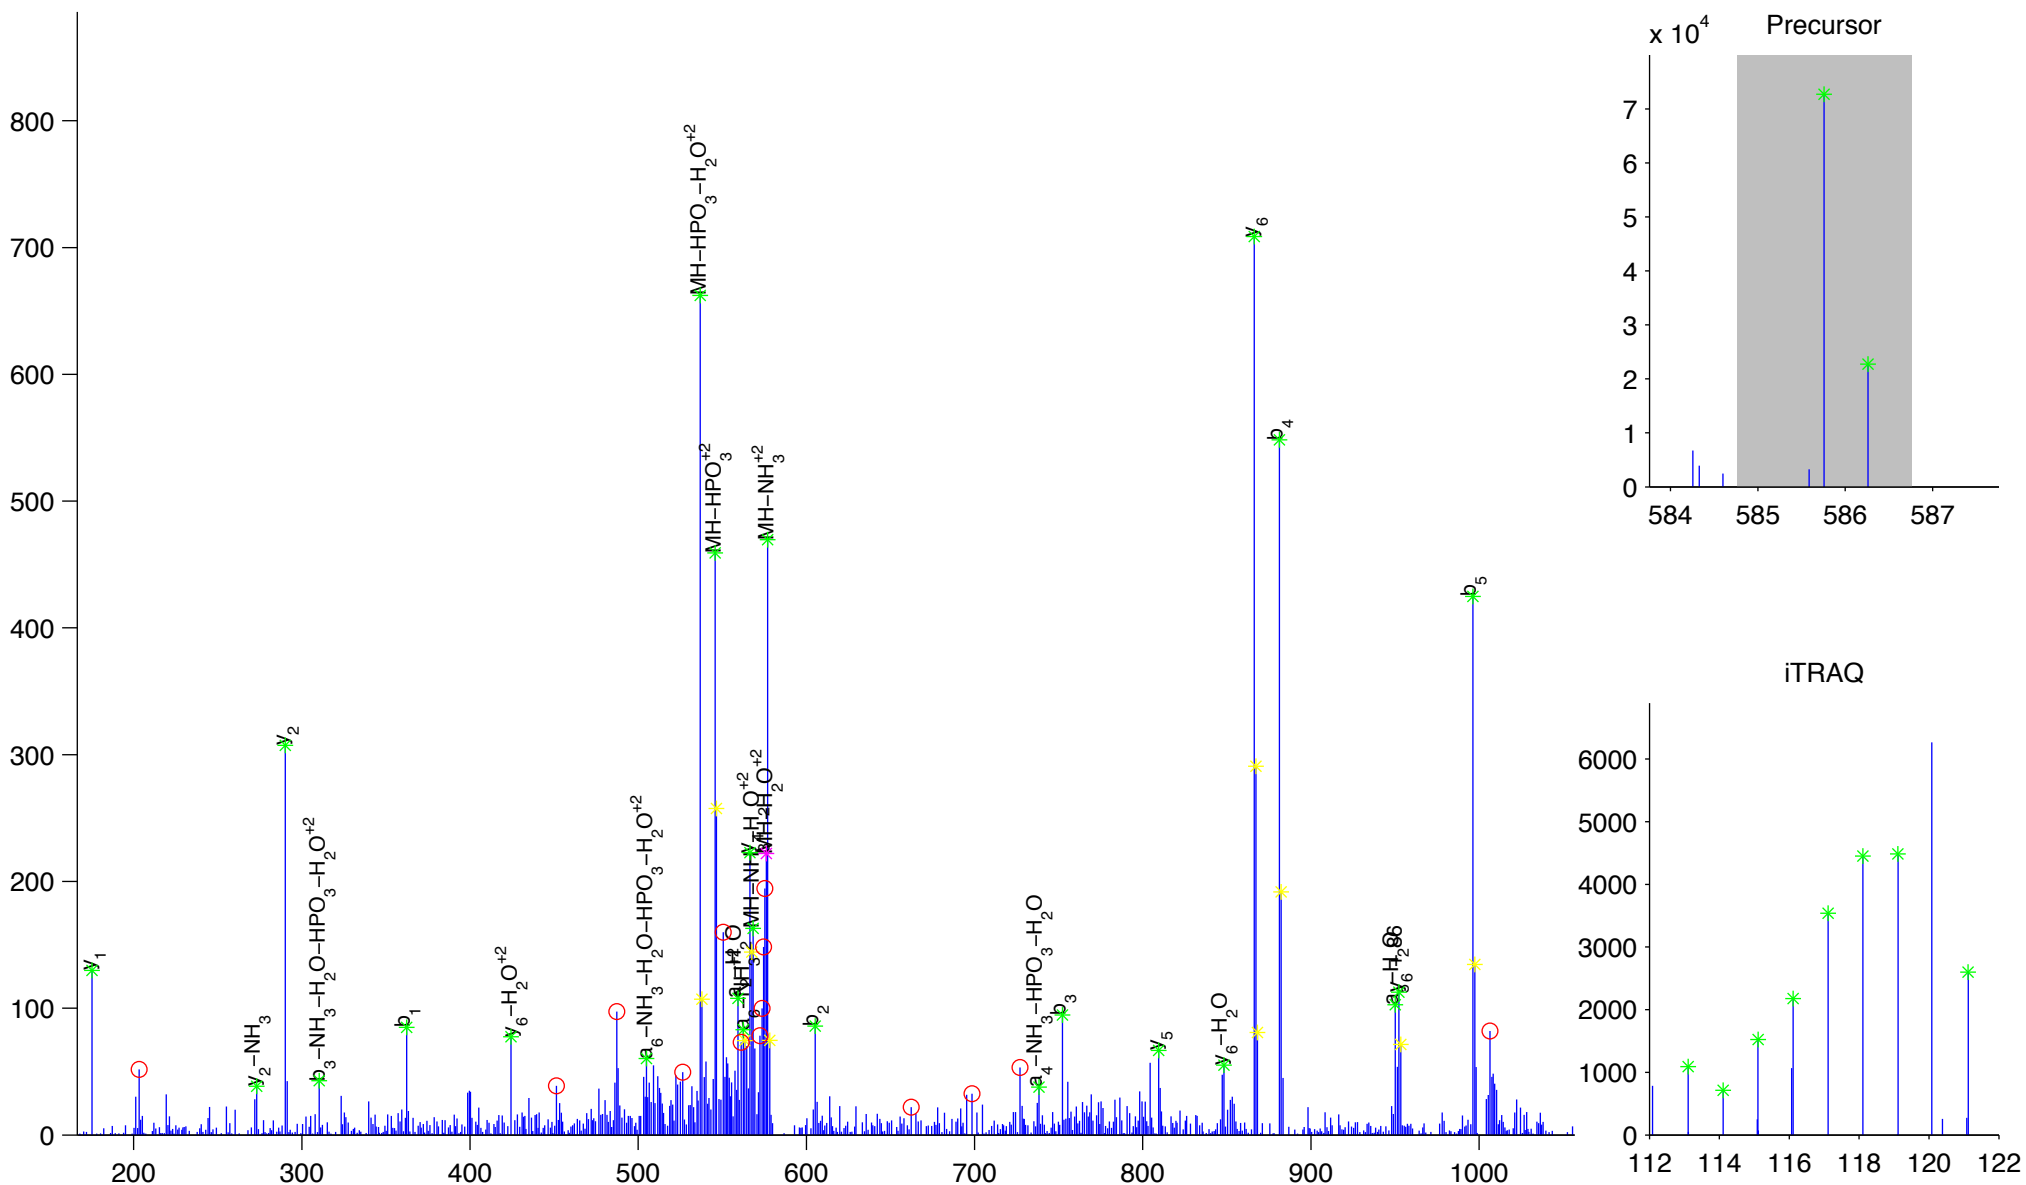

K [ G ] y [ F ] E [ D ] R

glutamine synthetase

Charge State: +3

Scan Number: 4088

File Name: 091130ptp1blivers\_hfd\_basal2.raw

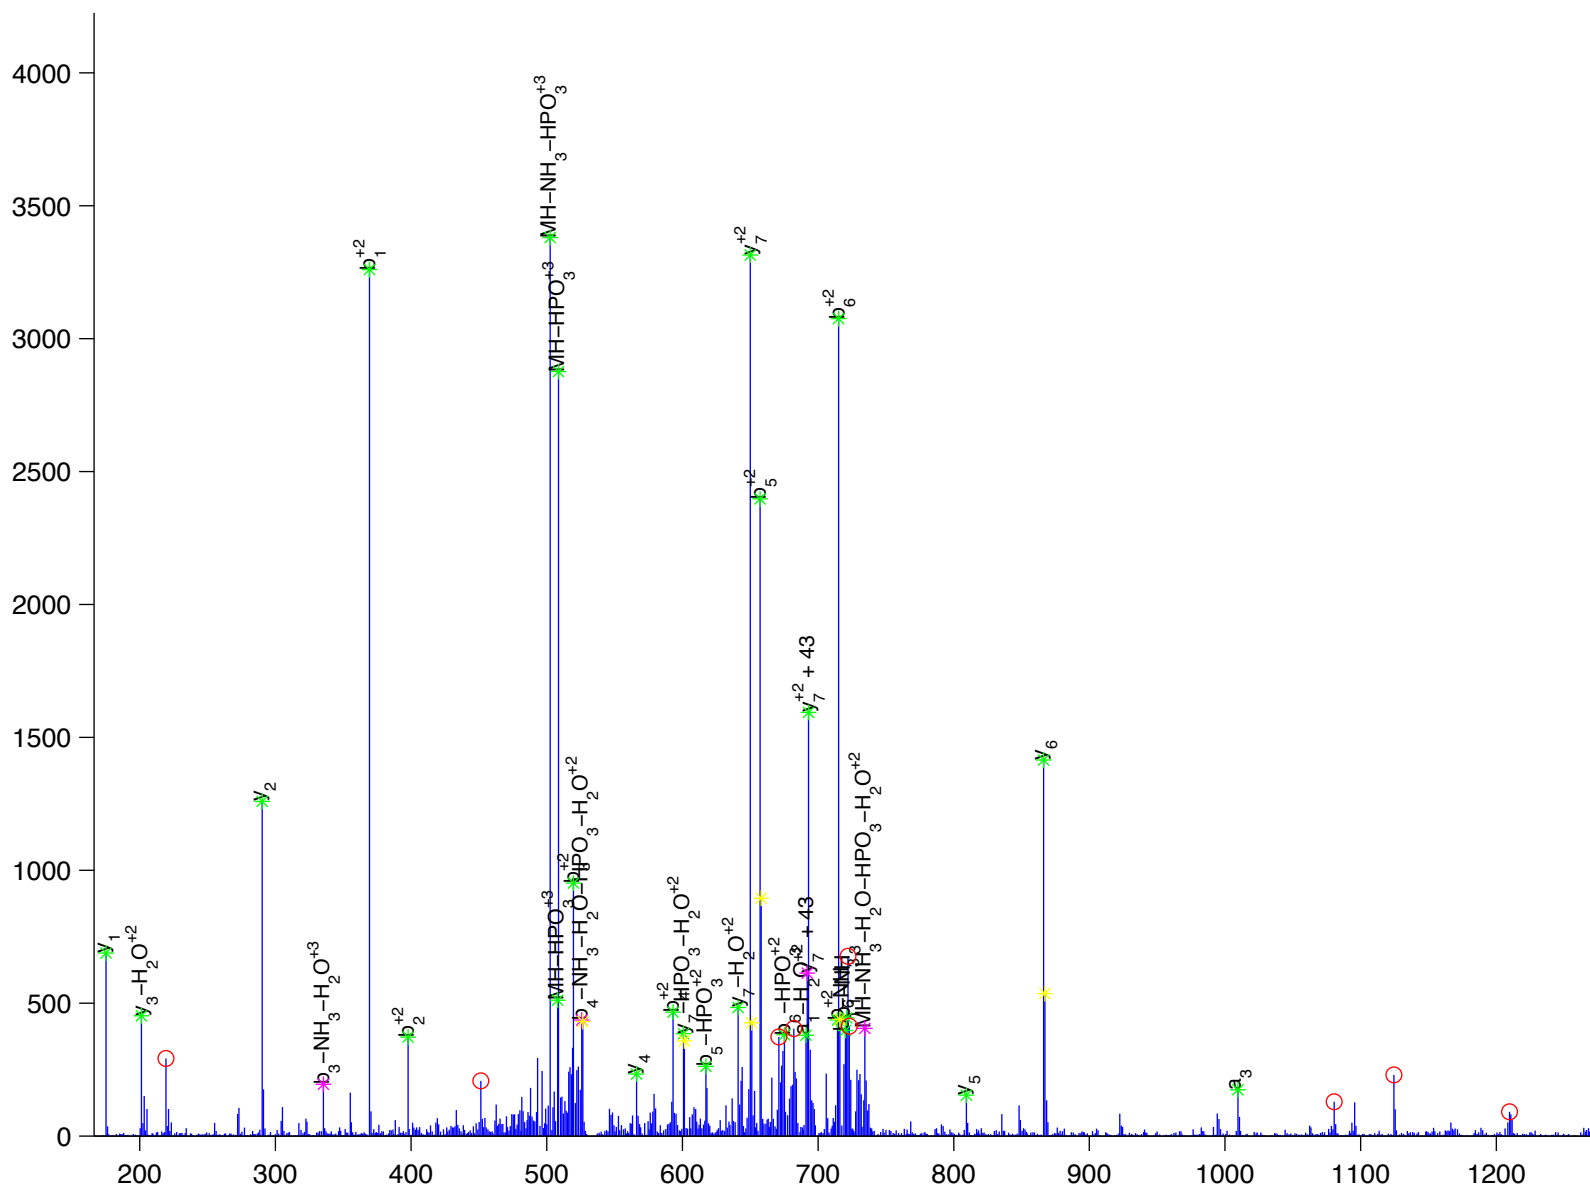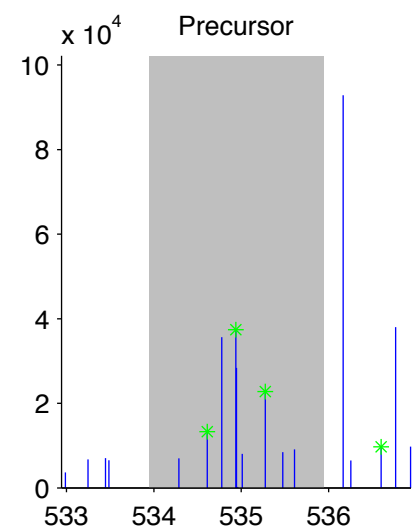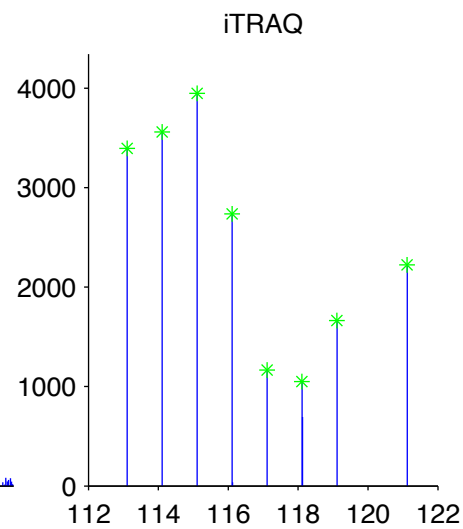

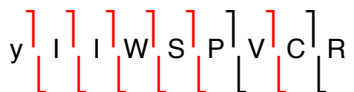

glutathione peroxidase 1

Charge State: +2

Scan Number: 3040

File Name: HJ072909\_HFD\_E1\_2.raw

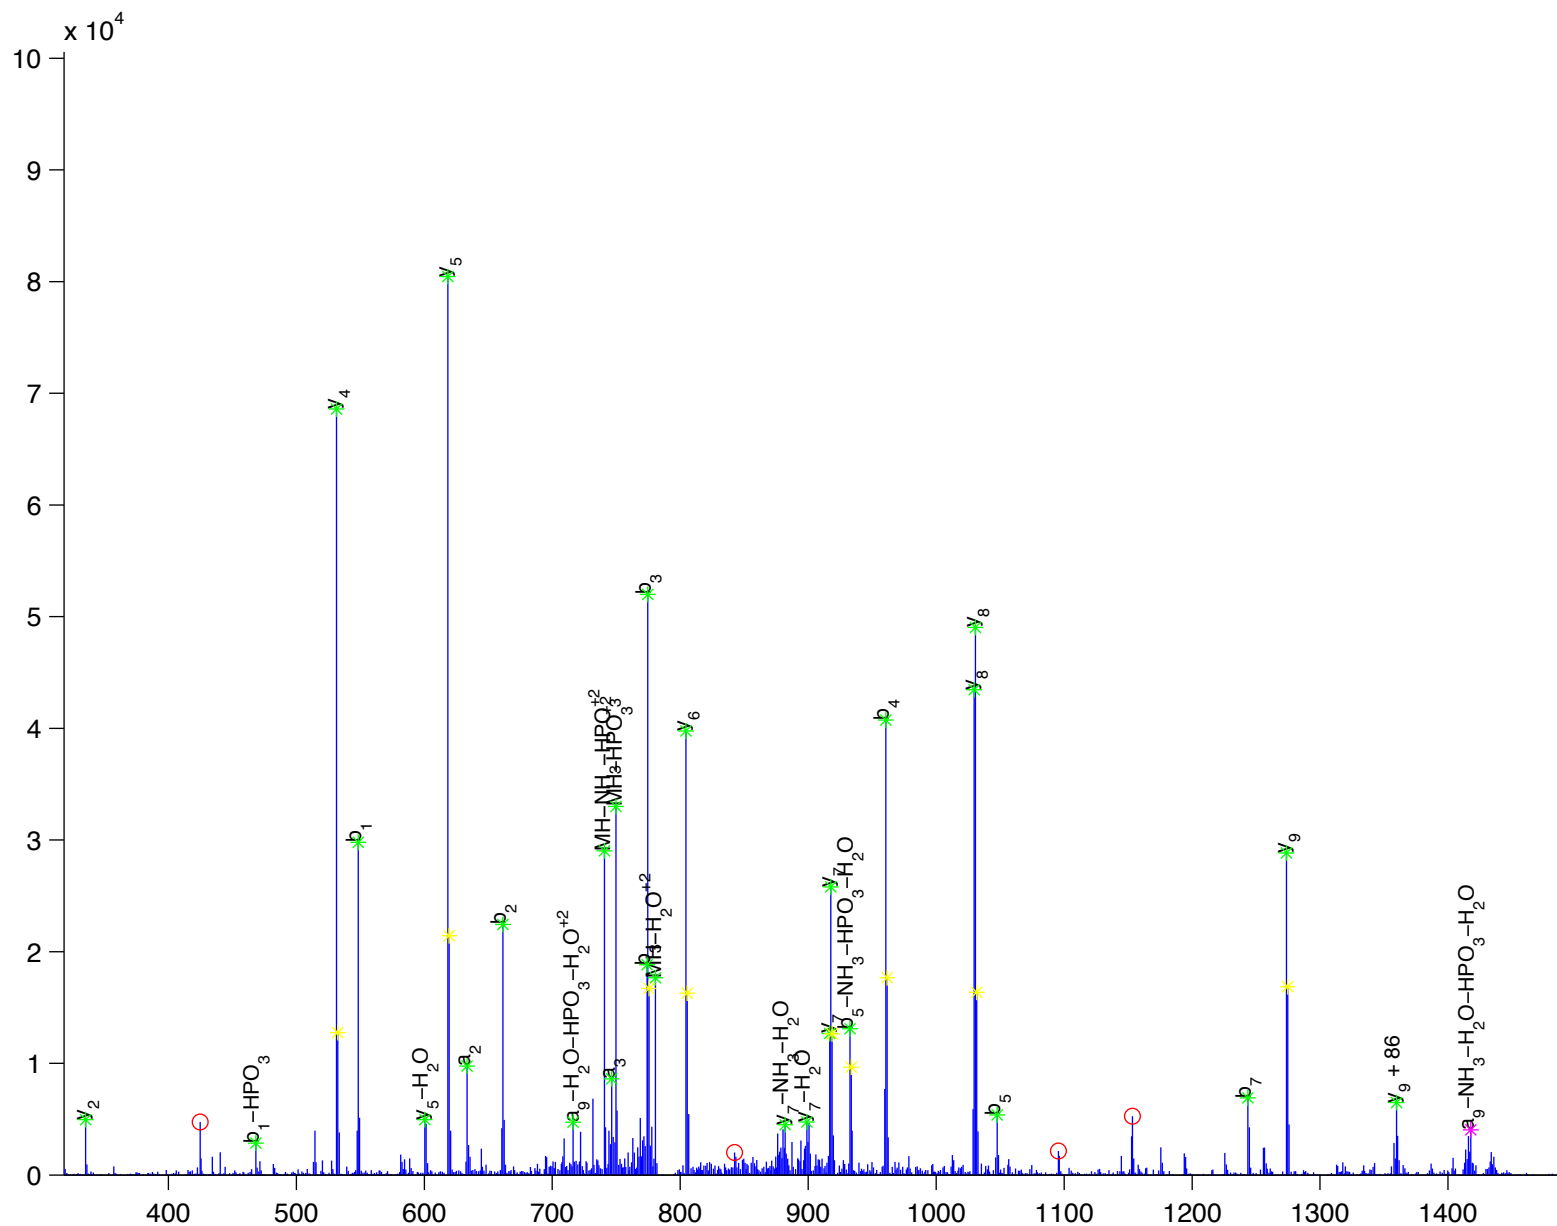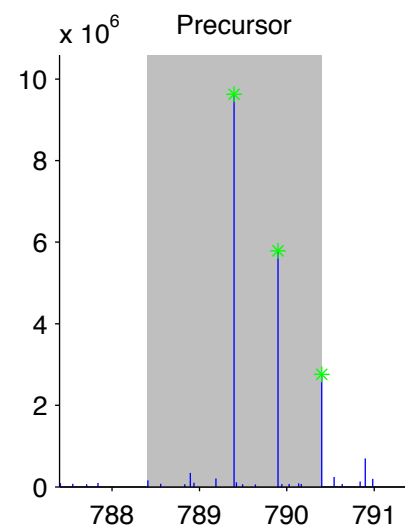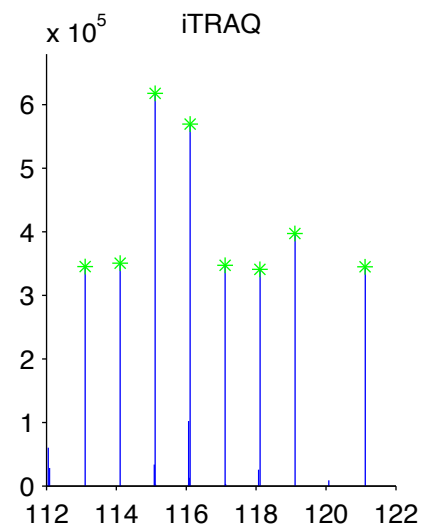



M L L E y T D S S Y D E K

glutathione S-transferase, mu 1

Charge State: +3

Scan Number: 5171

File Name: 100905ptp1blivers\_ncHFD\_basal.raw

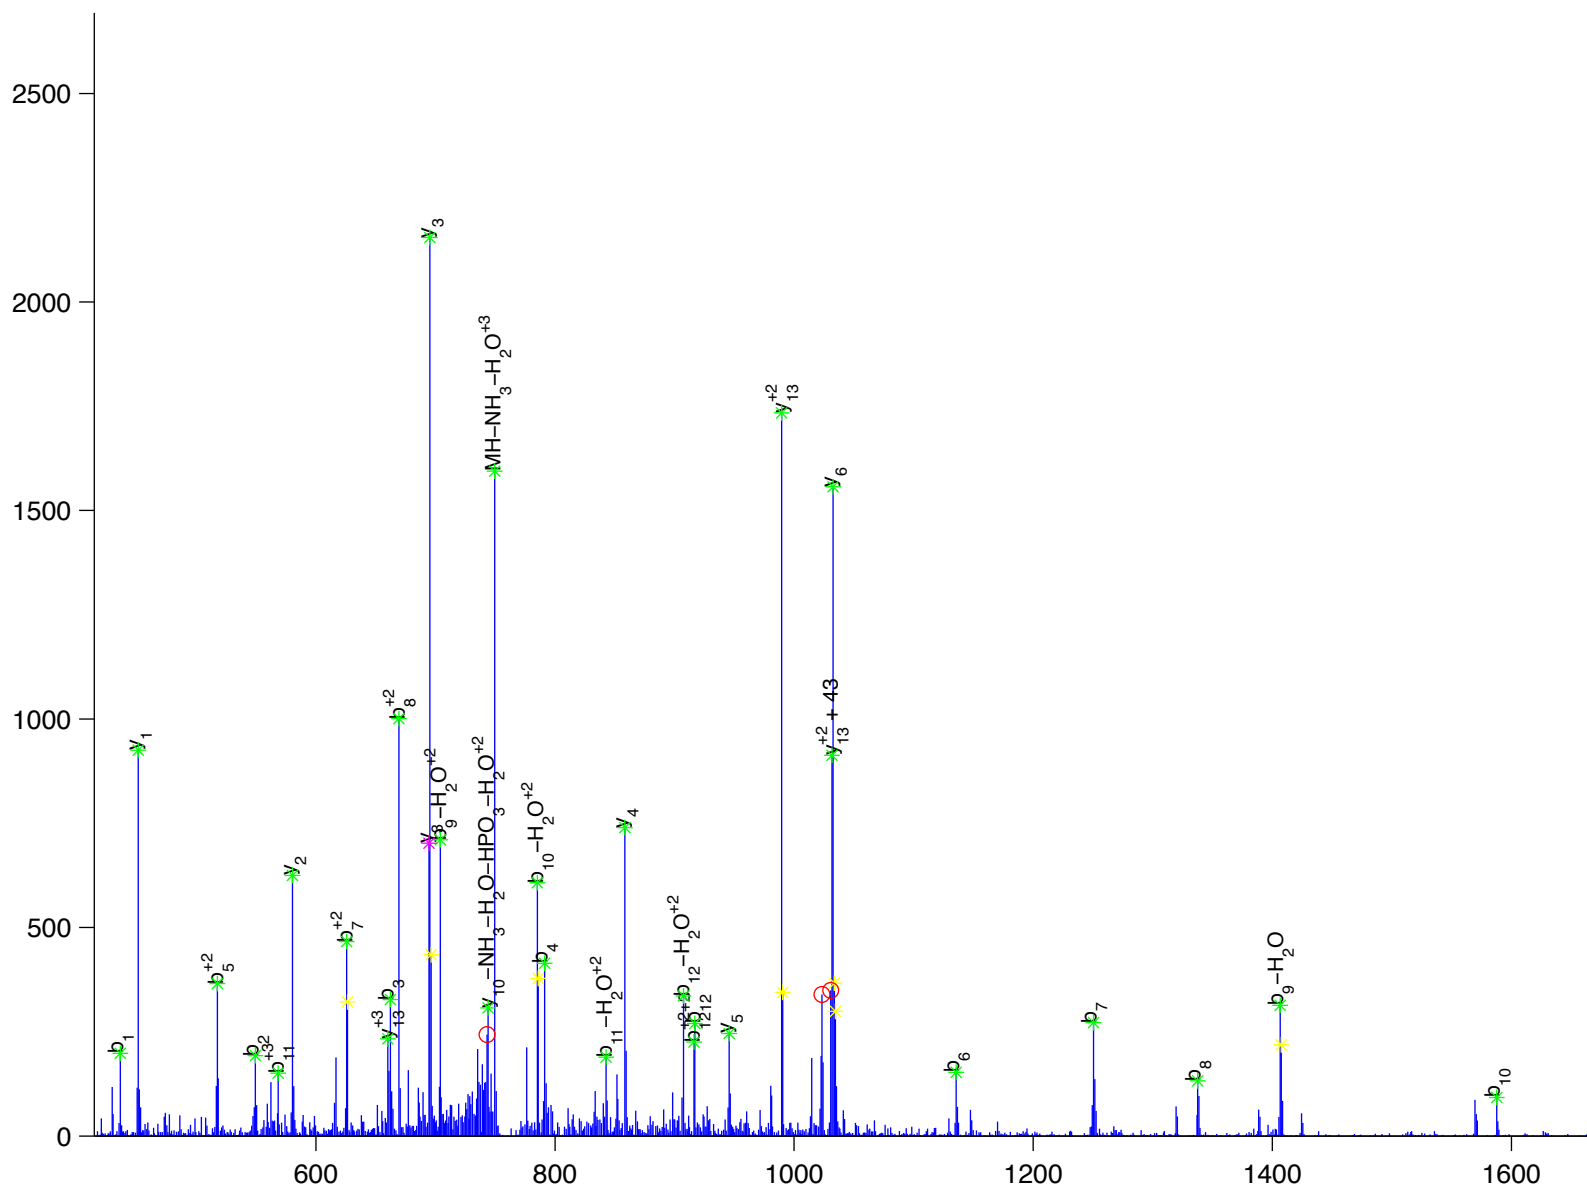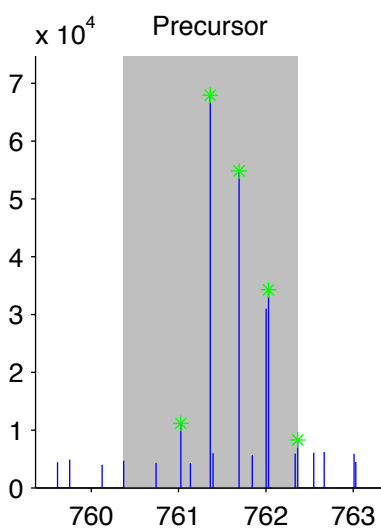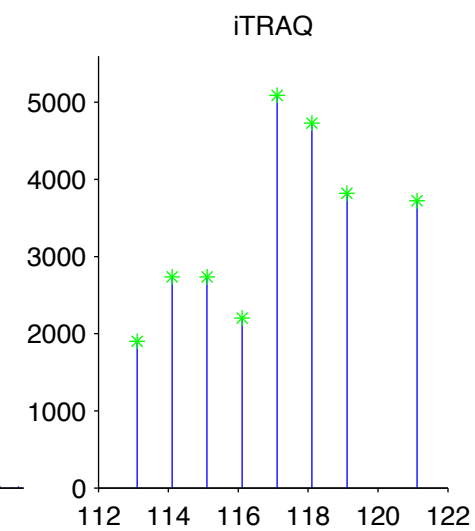

Y **V** T L I **y** T N Y E N G K

glutathione S-transferase, pi 1

Charge State: +3

Scan Number: 5881

File Name: 100905ptp1blivers\_ncHFD\_basal.raw

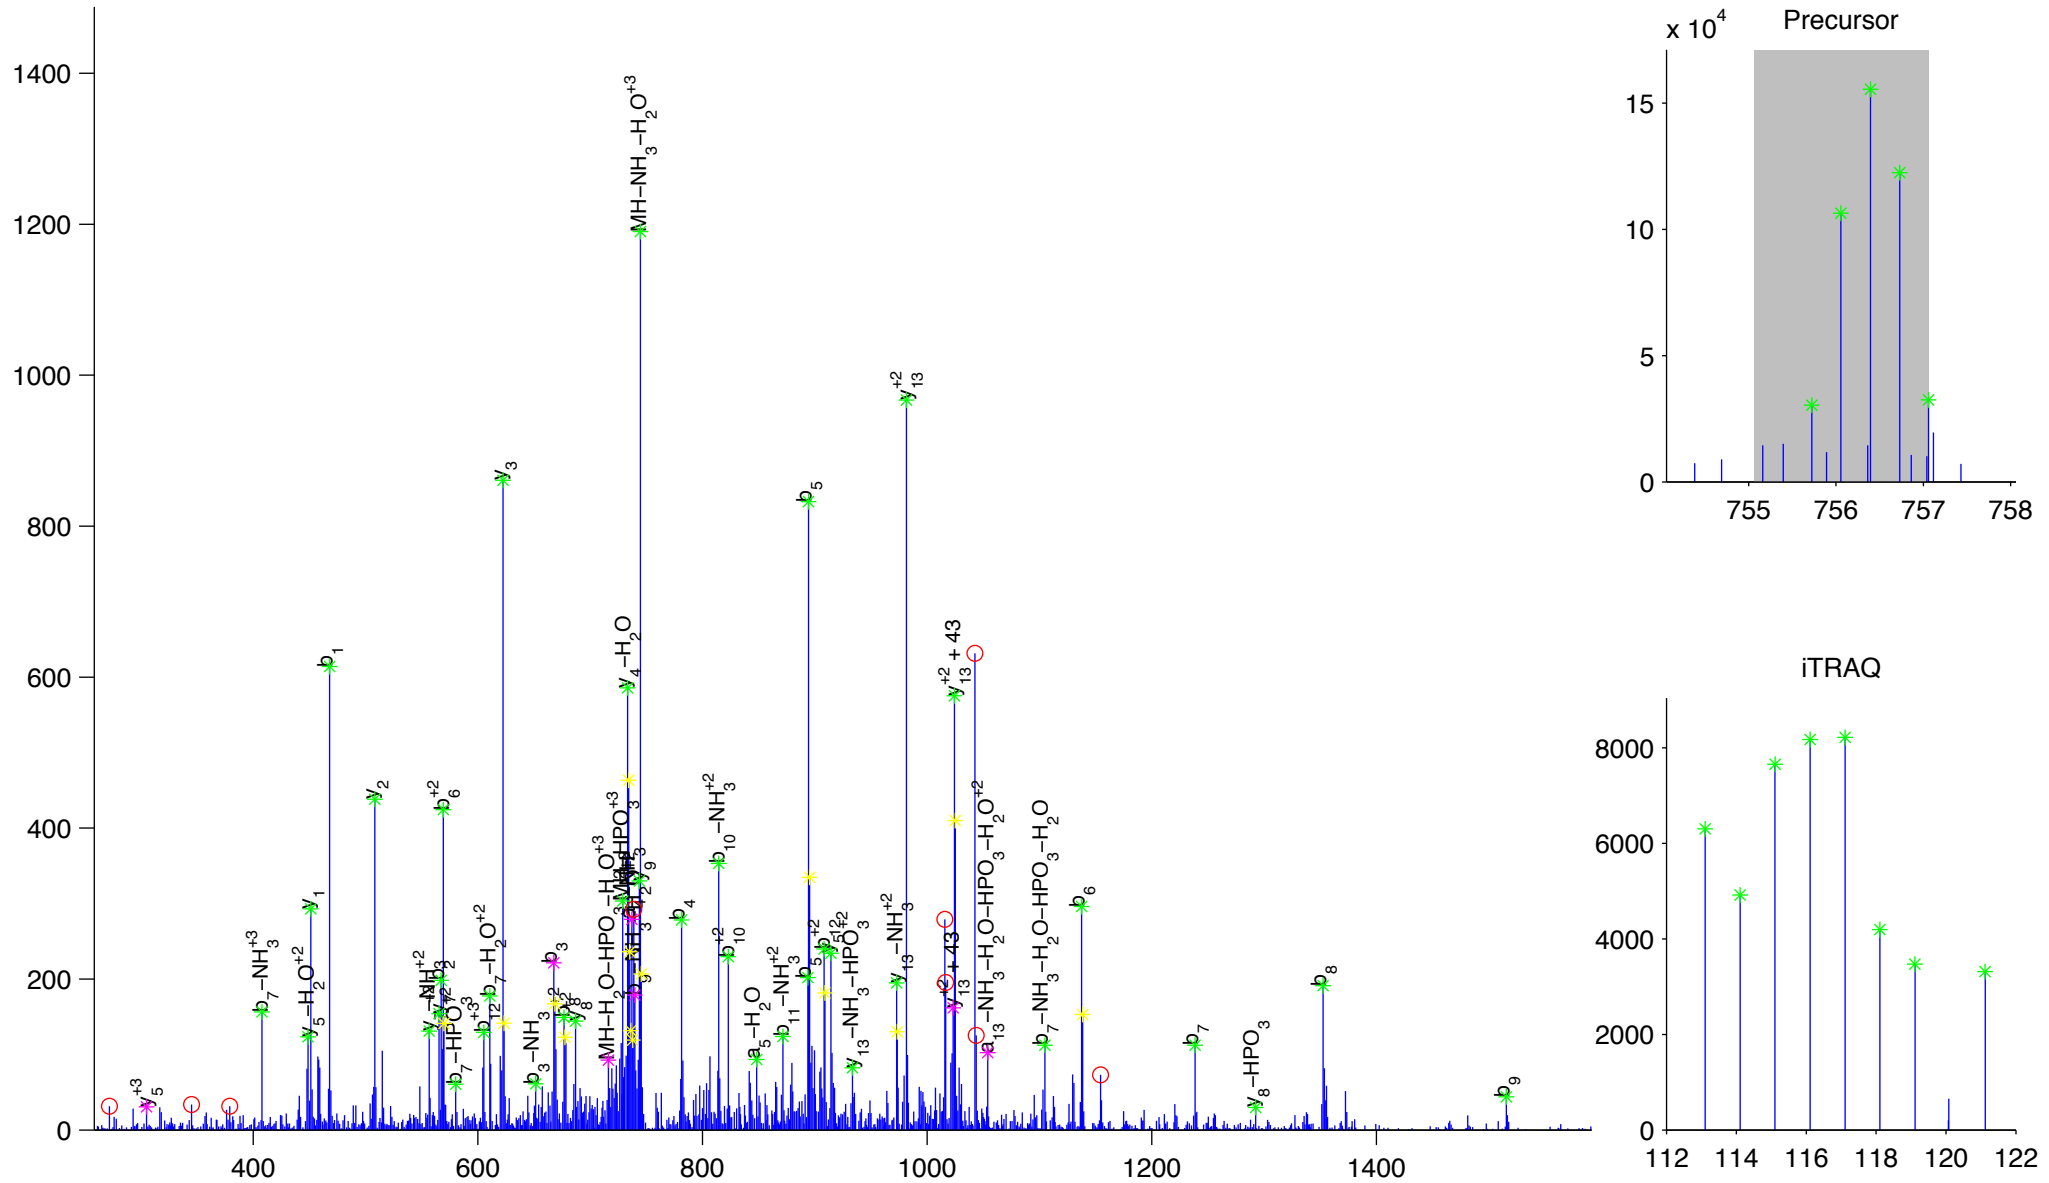

F [ E ] D [ G ] D [ L ] T [ L ] y [ Q ] S [ N ] A [ I ] L [ R ]

glutathione S-transferase, pi 1

Charge State: +3

Scan Number: 6412

File Name: 100611ptp1blivers\_nc\_basal.raw

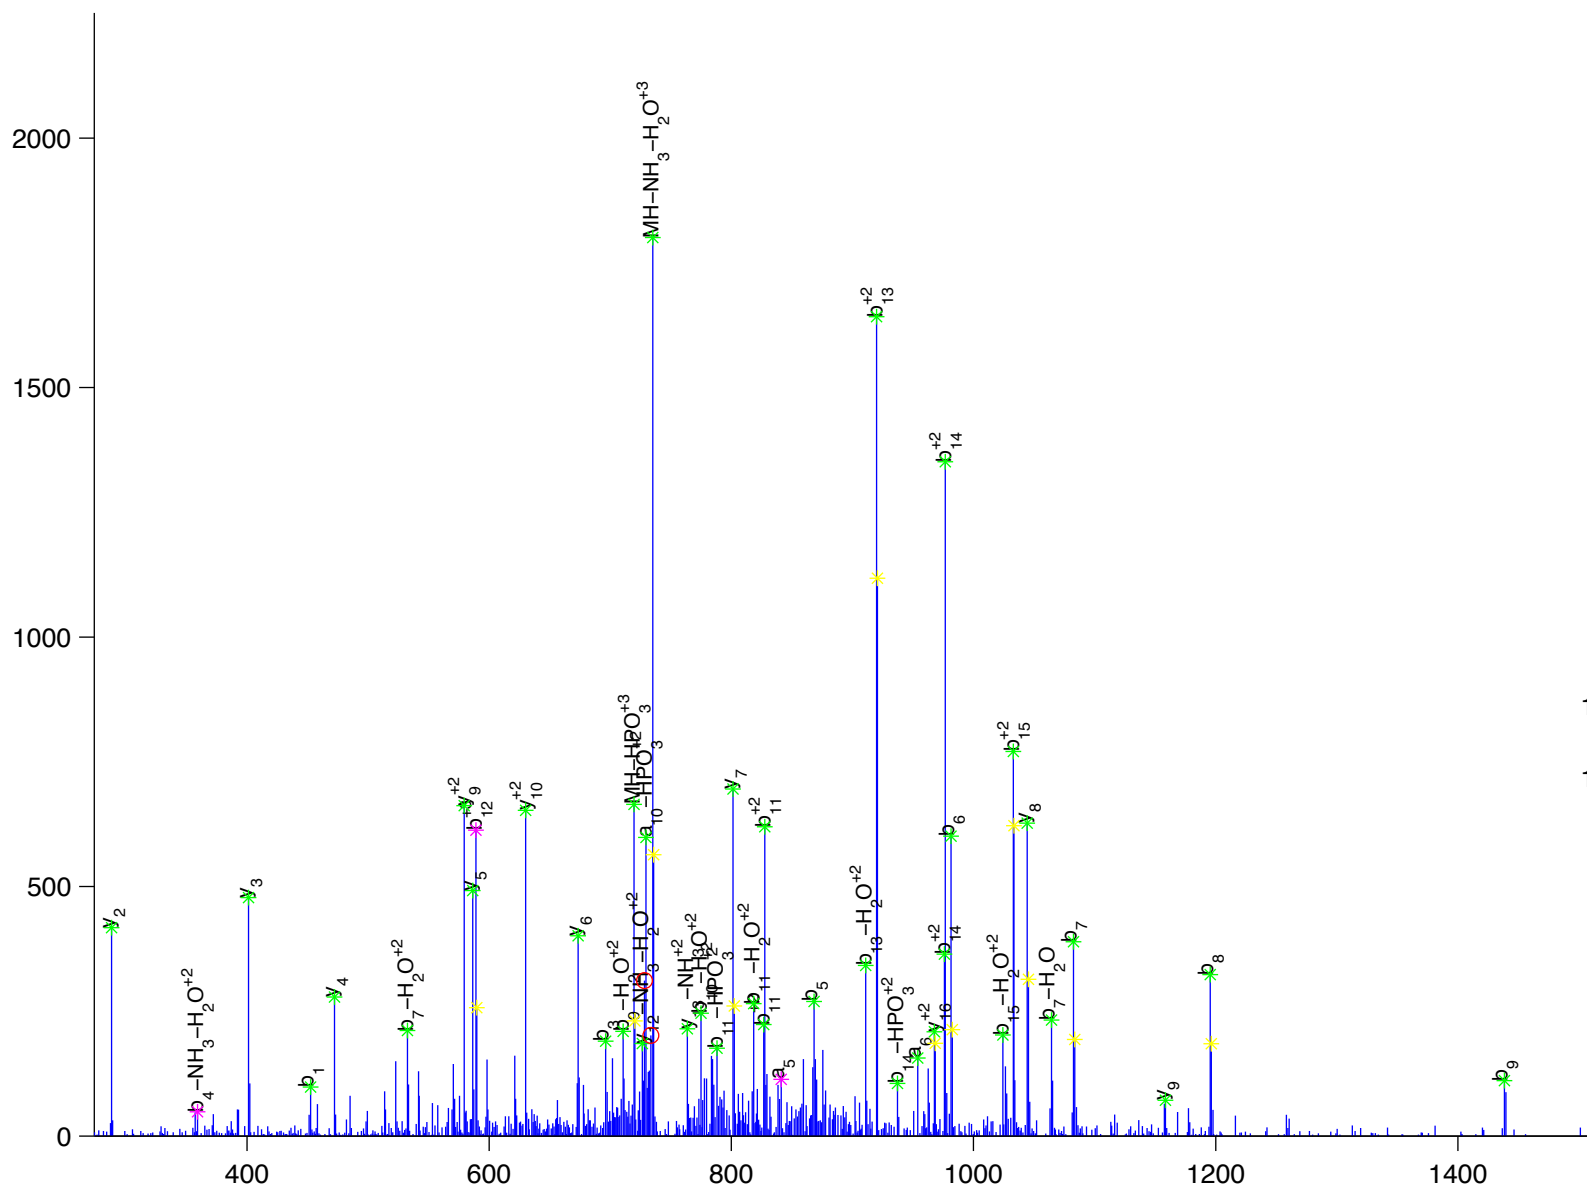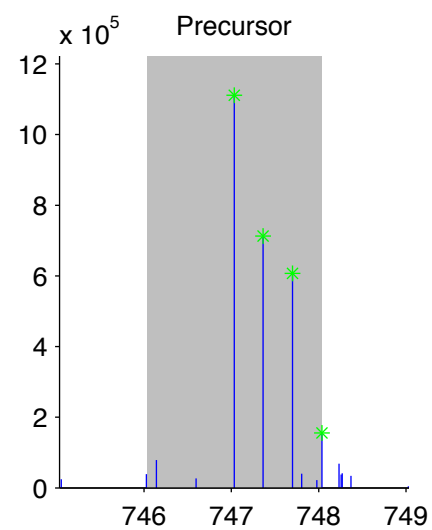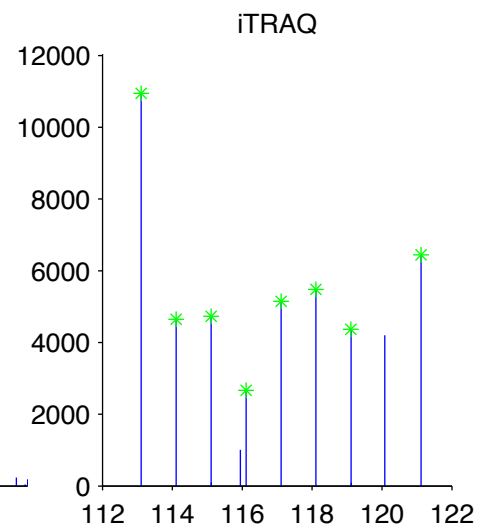

L I S W Y D N E y G Y S N R

glyceraldehyde-3-phosphate dehydrogenase

Charge State: +3

Scan Number: 5729

File Name: 100908ptp1blivers\_ncHFD3\_basal.raw

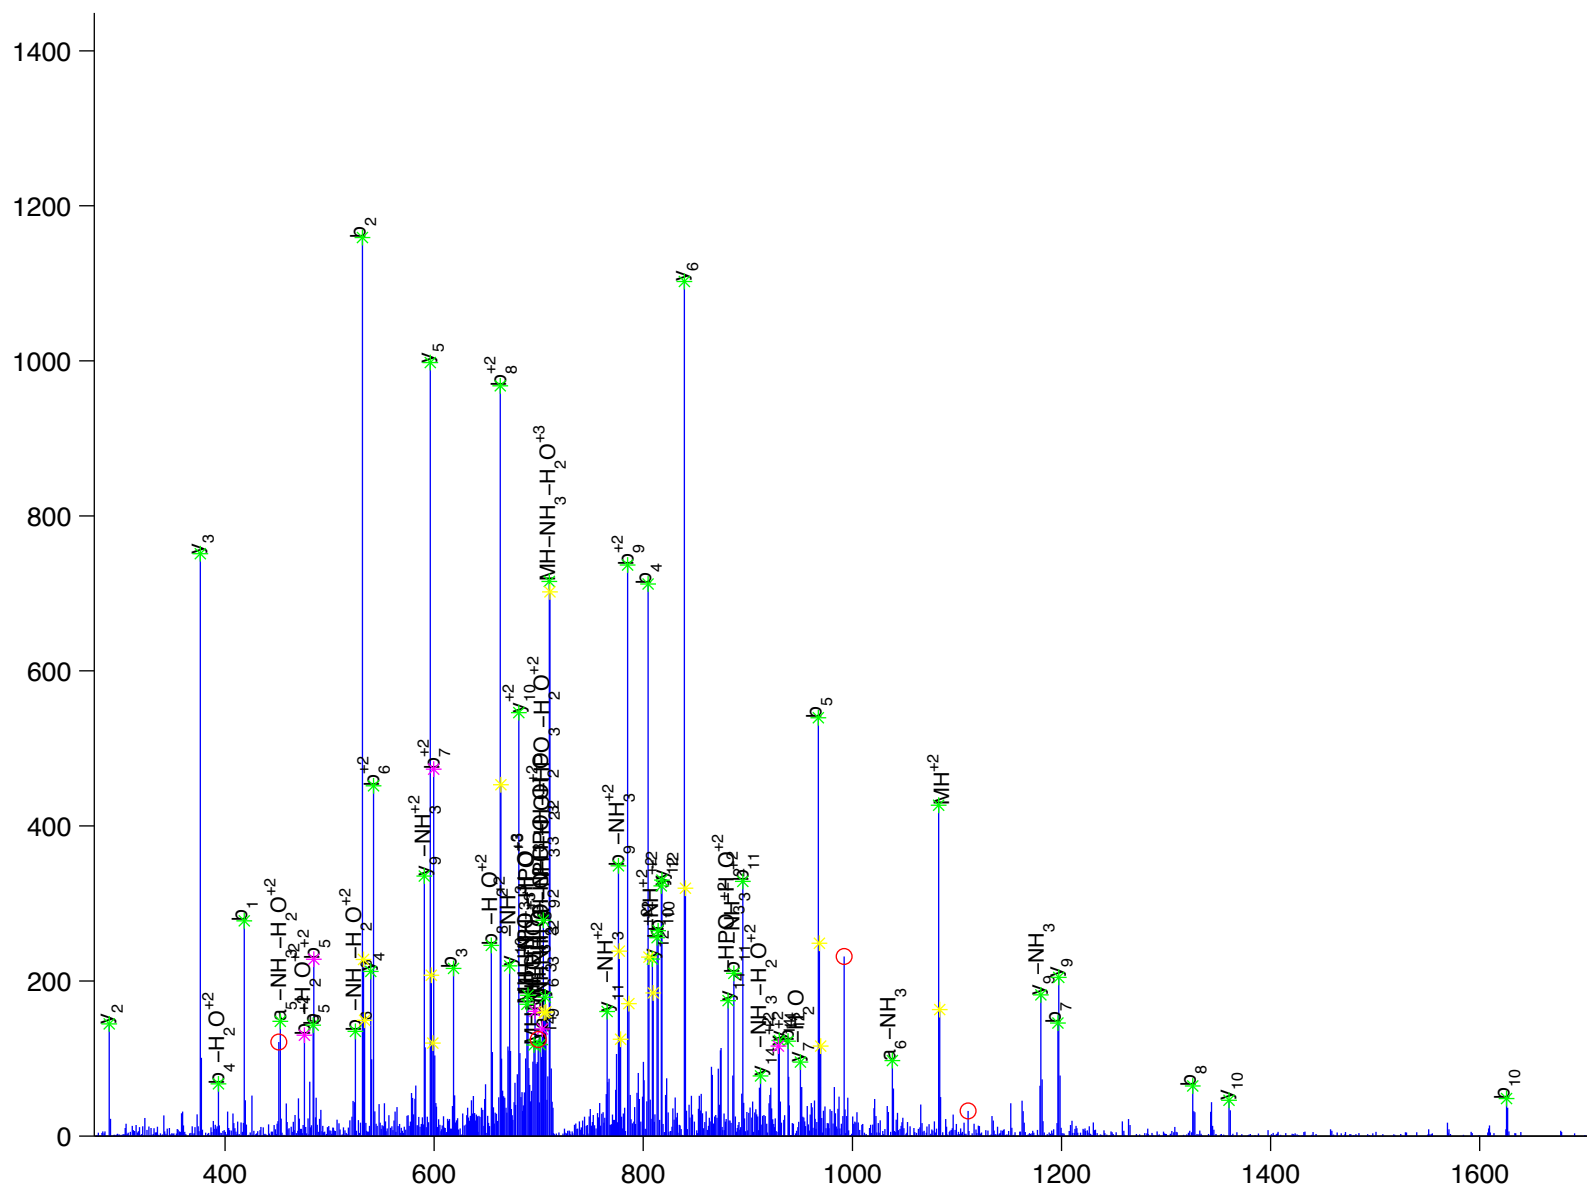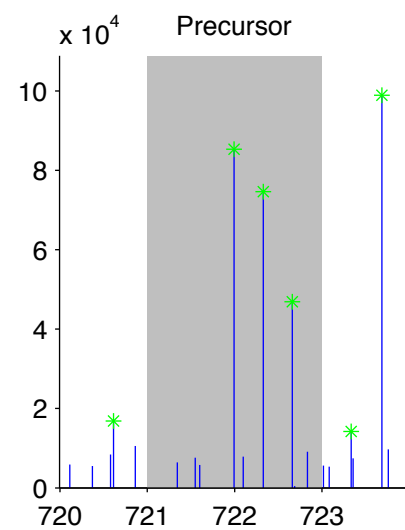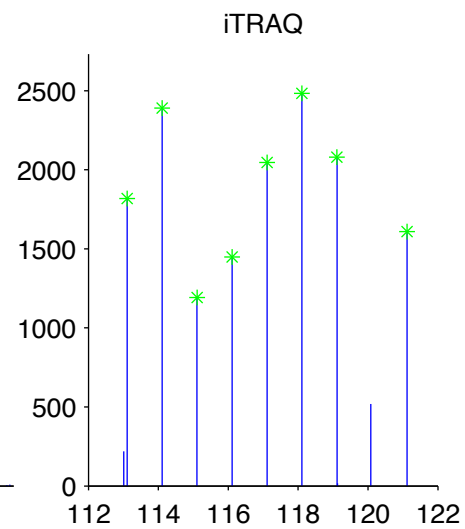

V[V[D[L[M[A]y[M[A]S]K

glyceraldehyde-3-phosphate dehydrogenase  
Charge State: +3  
Scan Number: 9773  
File Name: 091130ptp1blivers\_hfd\_basal2.raw

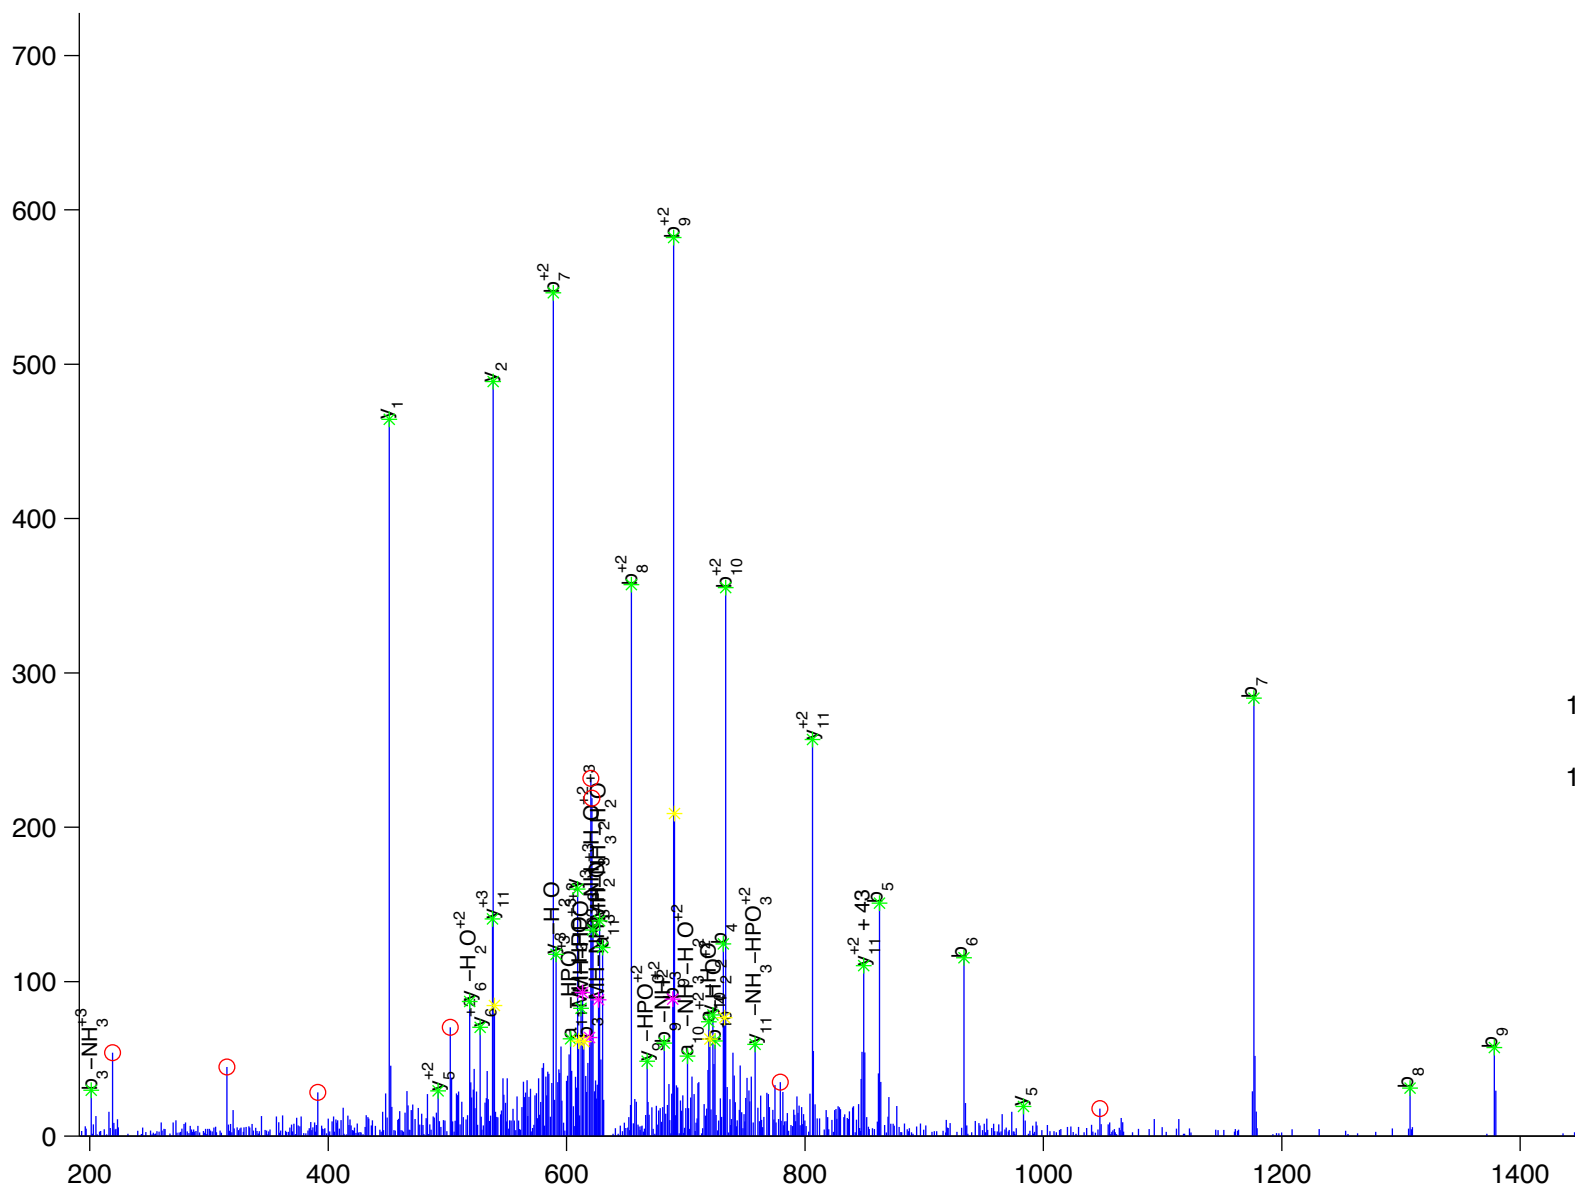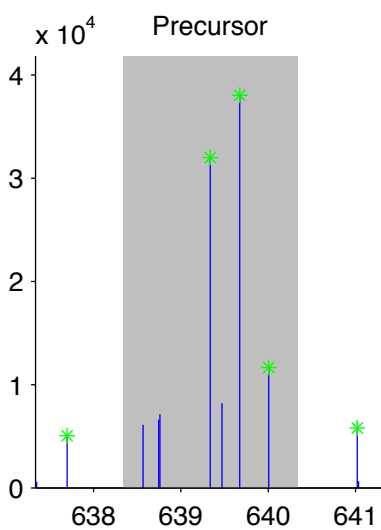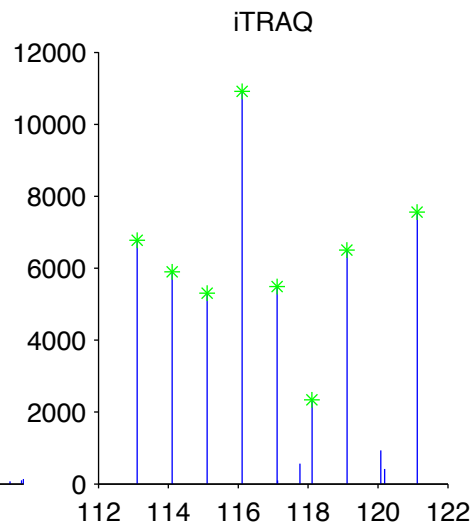

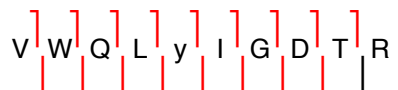

glycine N-methyltransferase

Charge State: +3

Scan Number: 5610

File Name: 100908ptp1blivers\_ncHFD3\_basal.raw

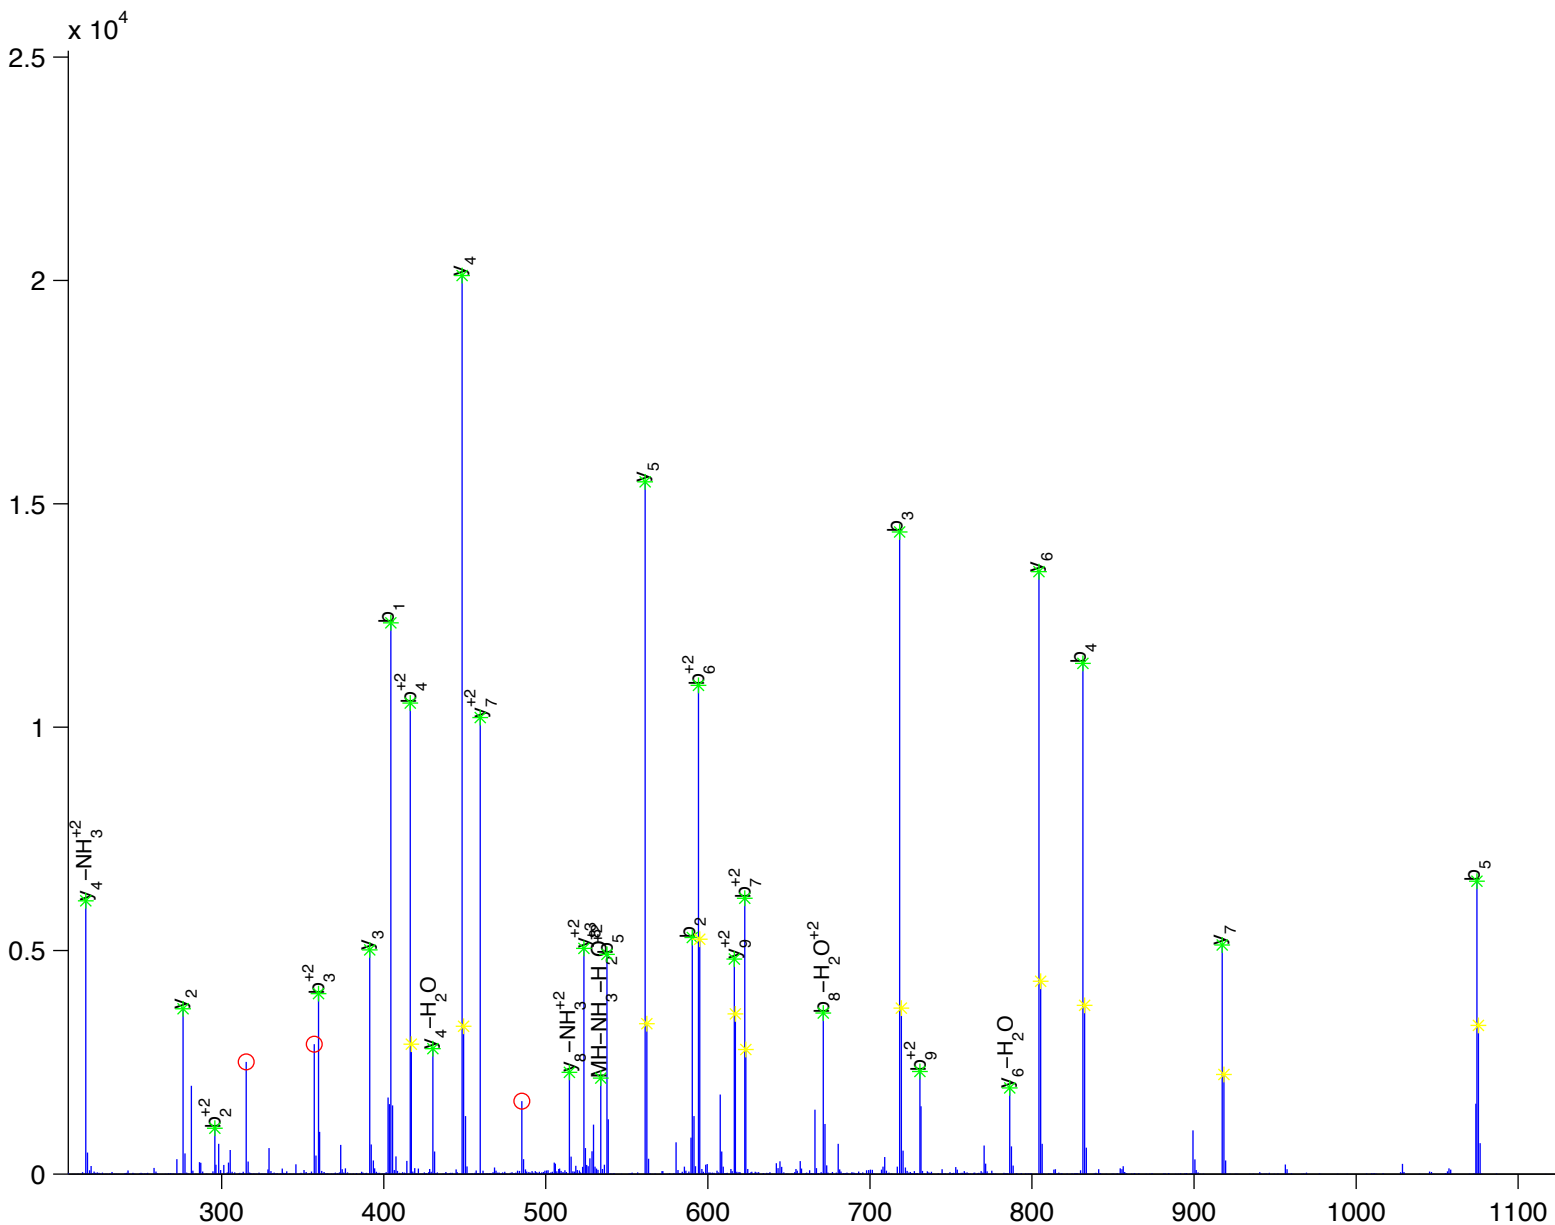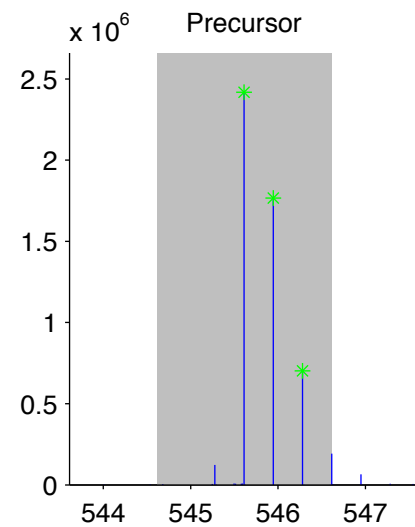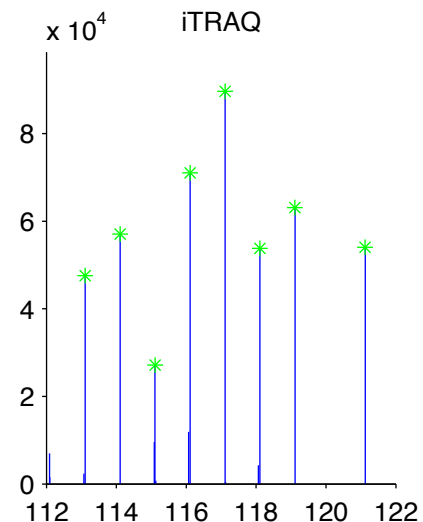

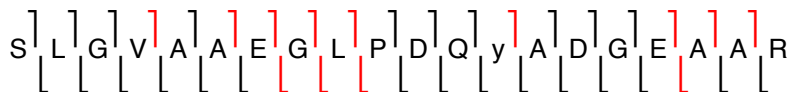

glycine N-methyltransferase

Charge State: +3

Scan Number: 5728

File Name: 090806ptp1blivers\_M\_NC2.raw

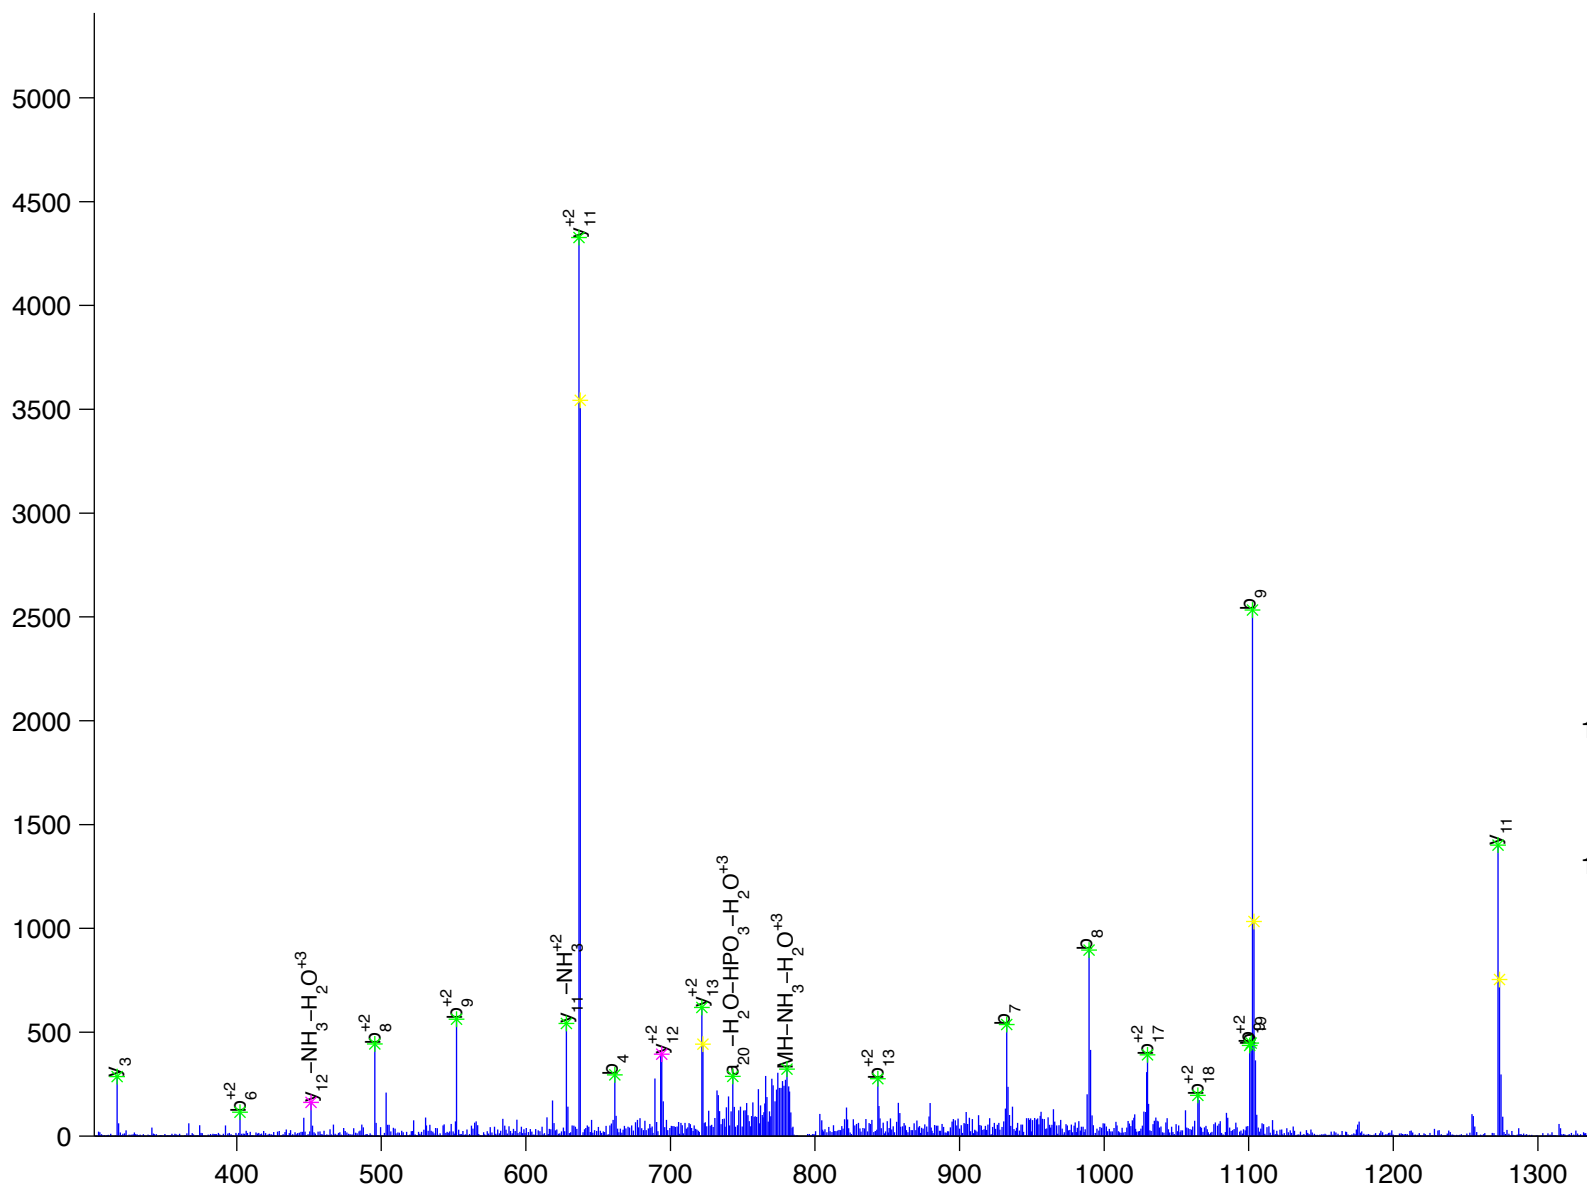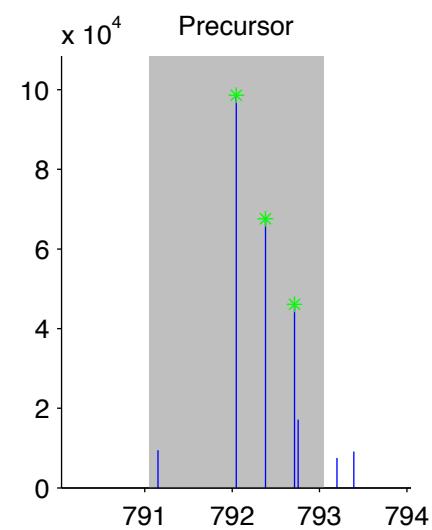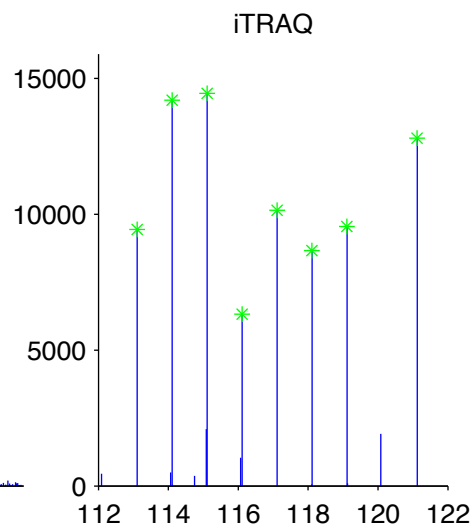

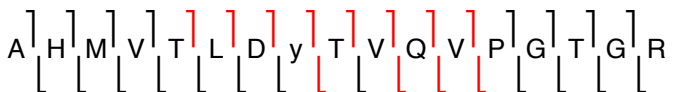

glycine N-methyltransferase

Charge State: +3

Scan Number: 6062

File Name: 090806ptp1blivers\_M\_NC2.raw

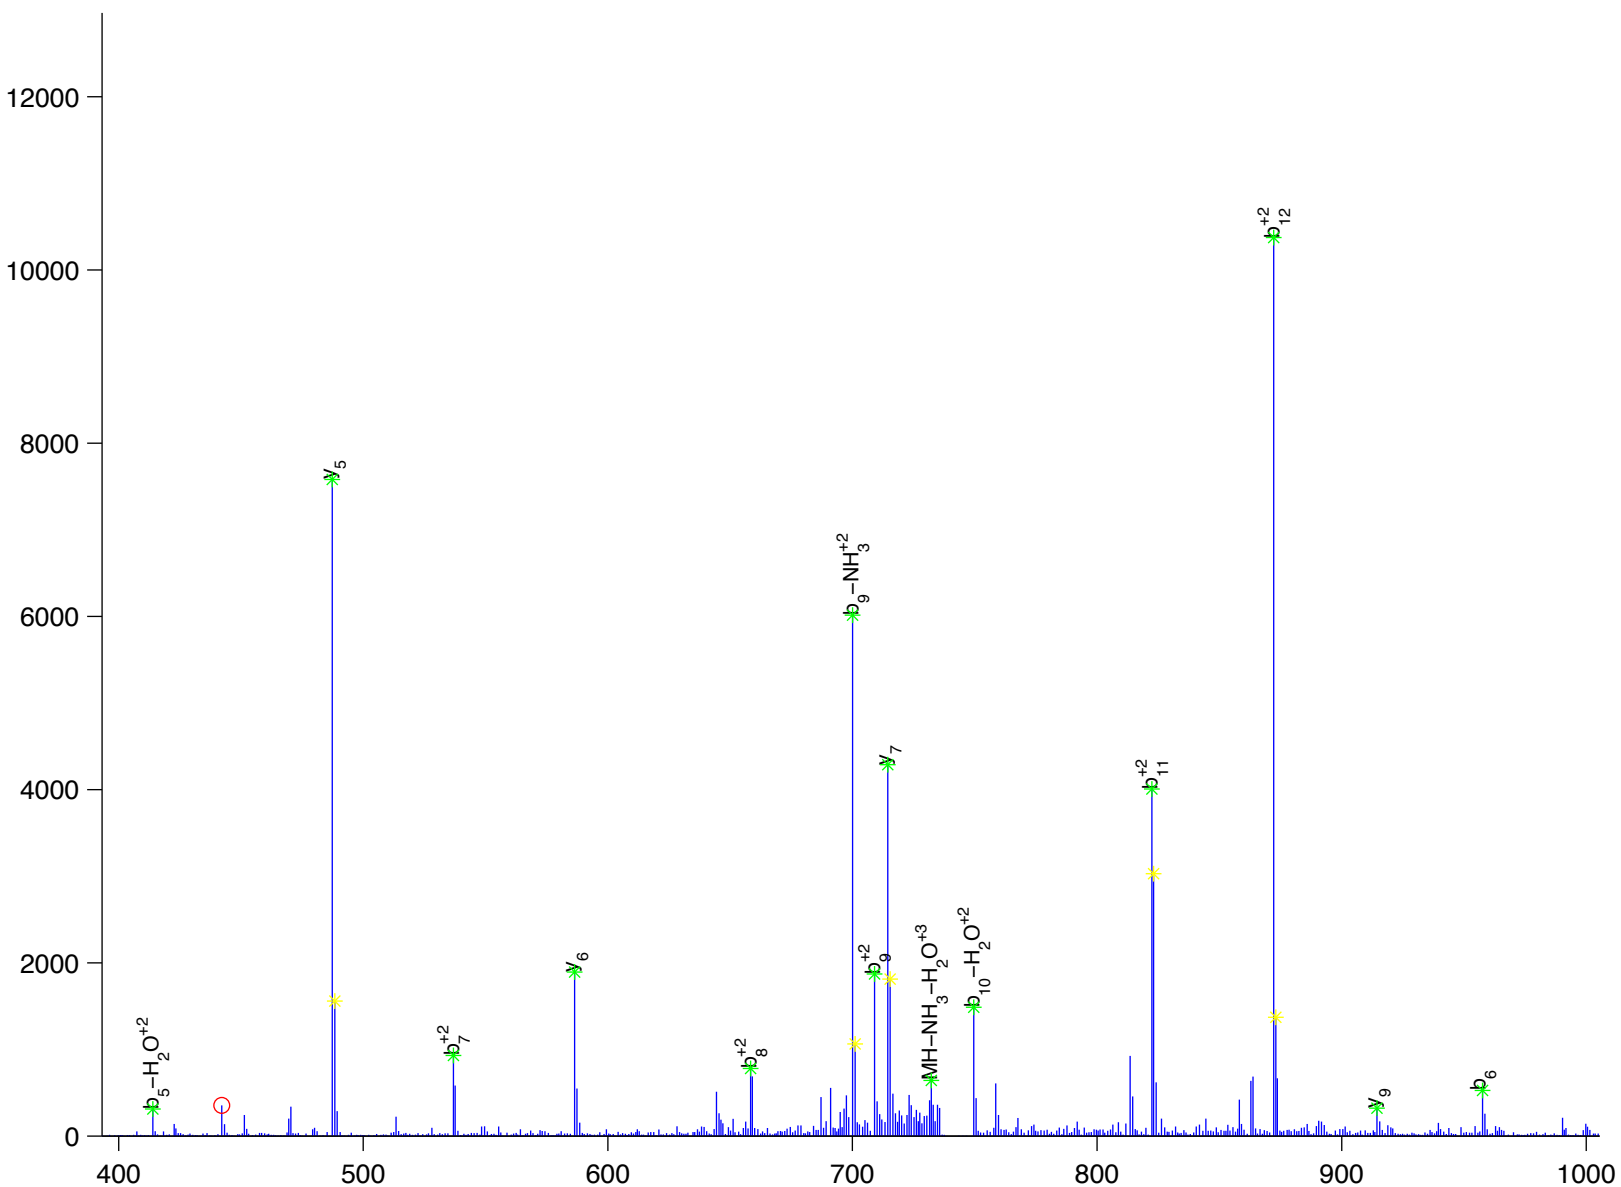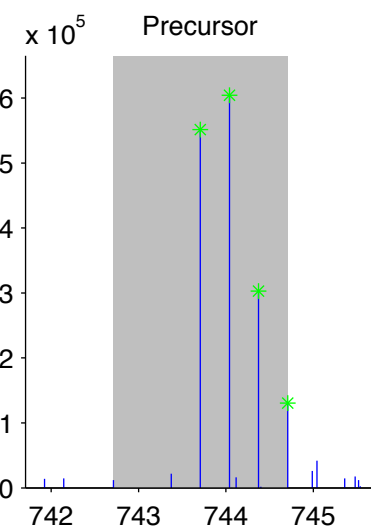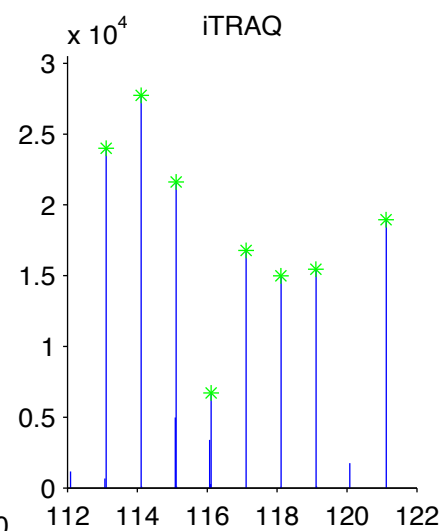



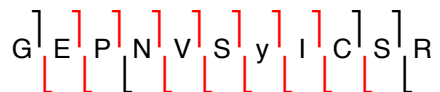

glycogen synthase kinase 3 beta

Charge State: +3

Scan Number: 3651

File Name: 100905ptp1blivers\_ncHFD\_basal.raw

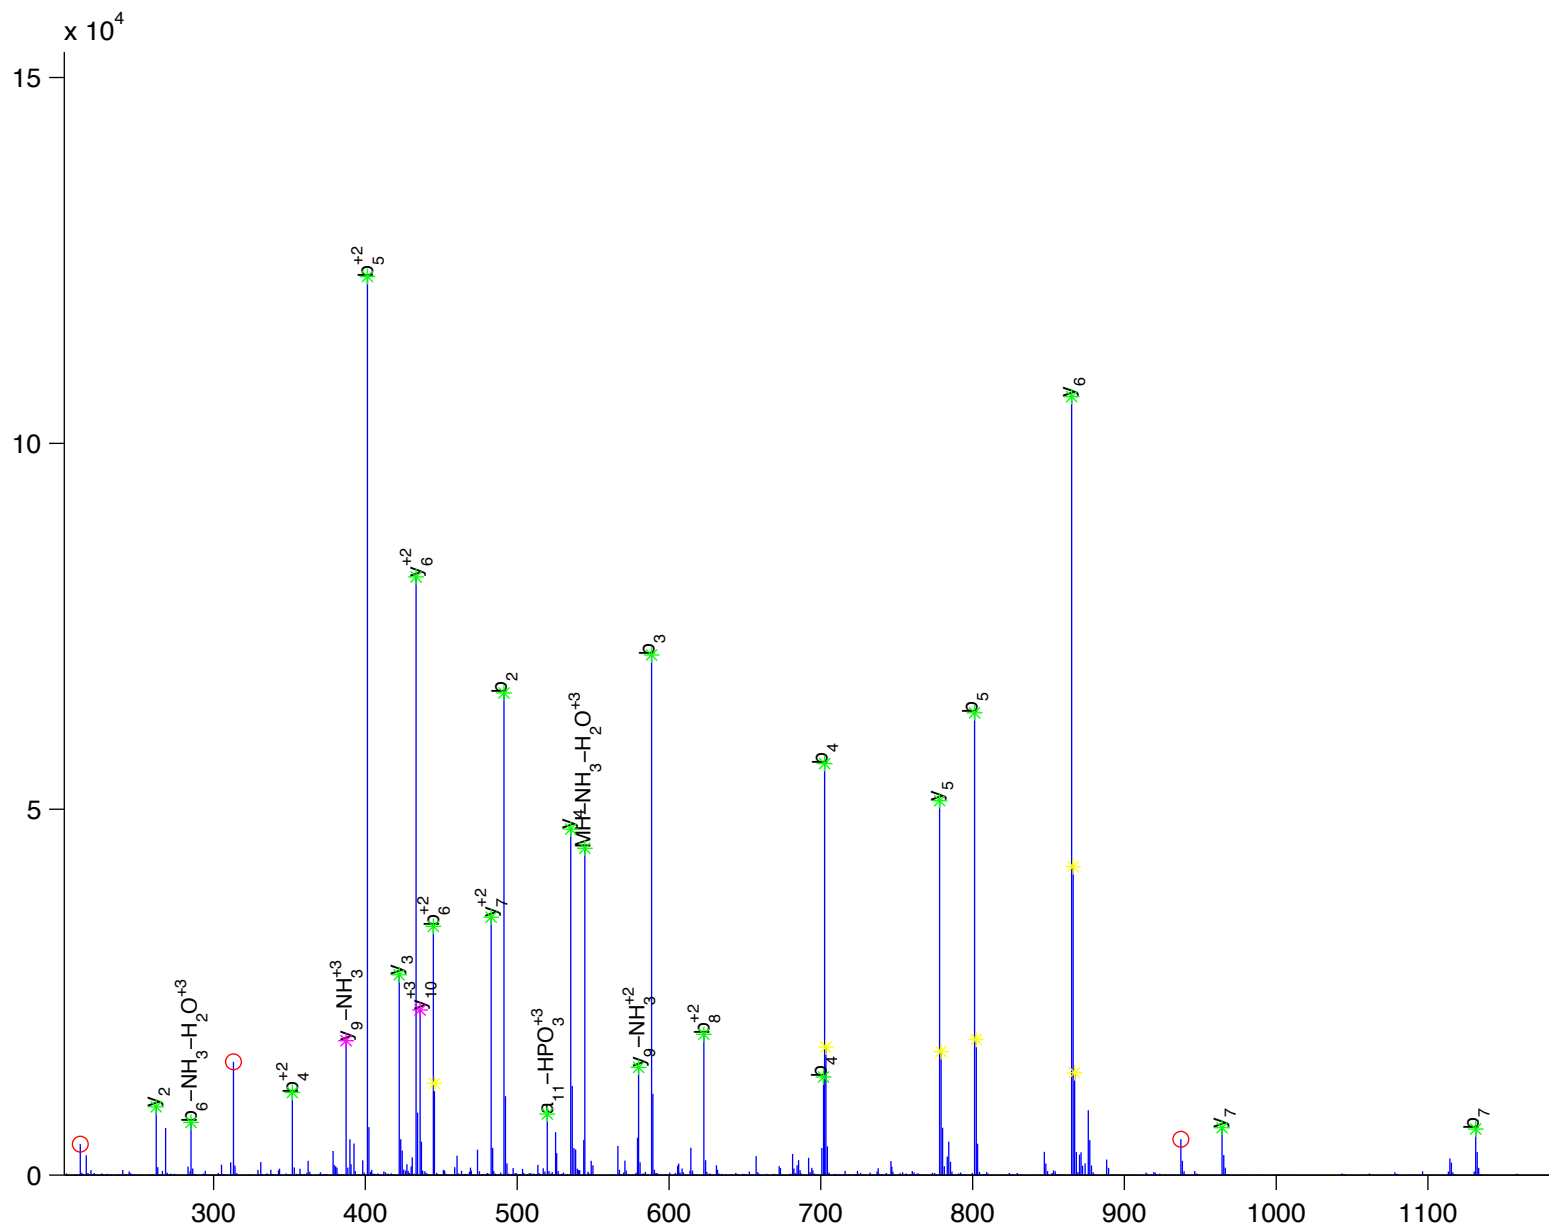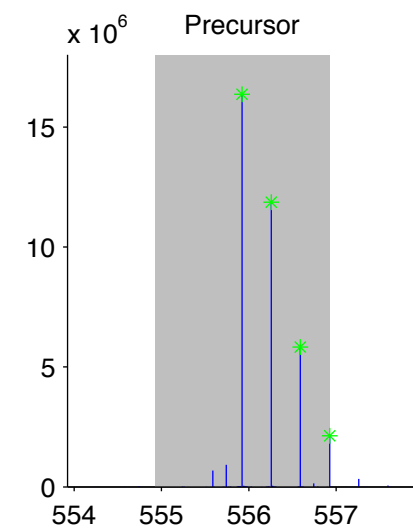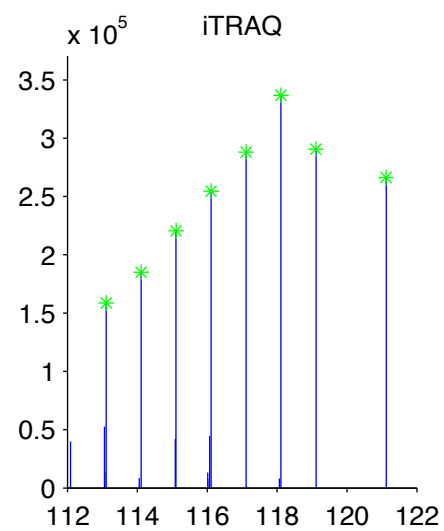

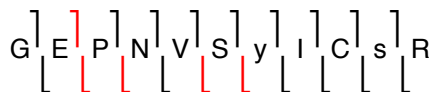

glycogen synthase kinase 3 beta

Charge State: +2

Scan Number: 4078

File Name: 090728ptp1blivers\_M\_NC\_ins\_e.raw

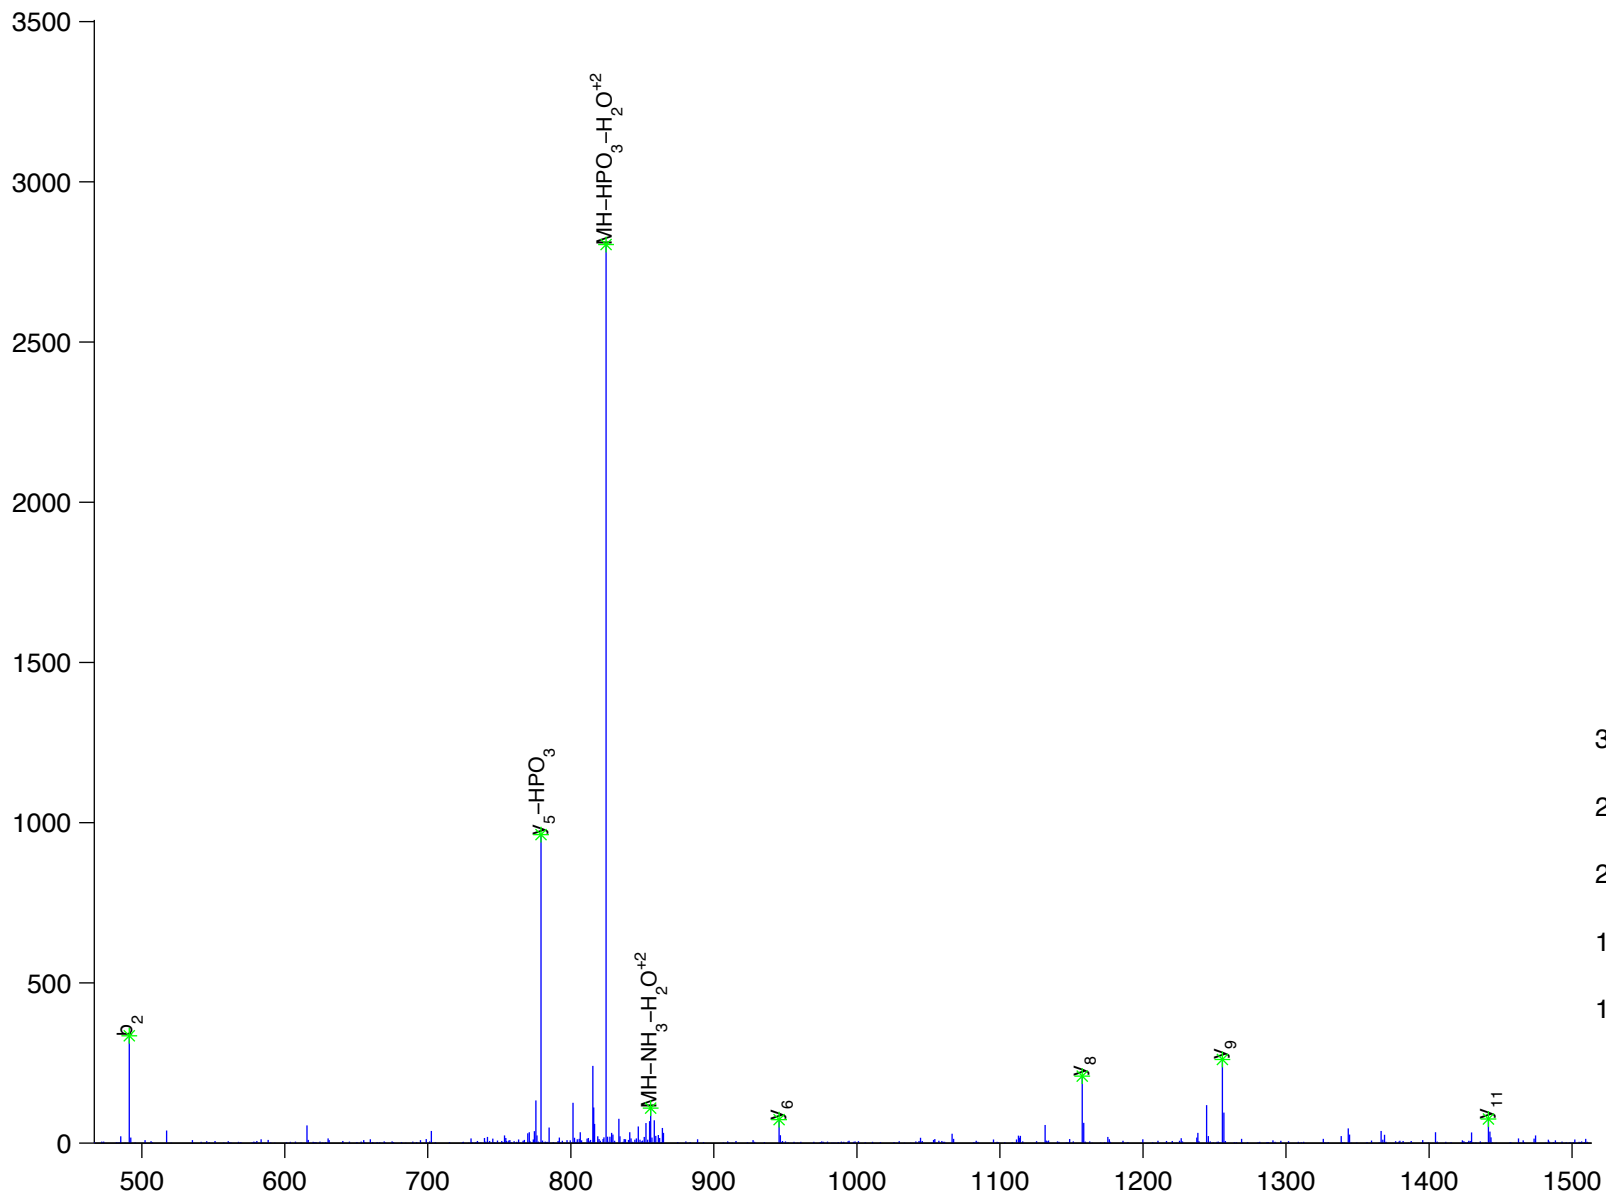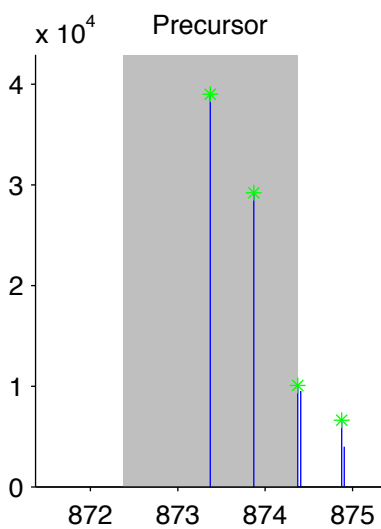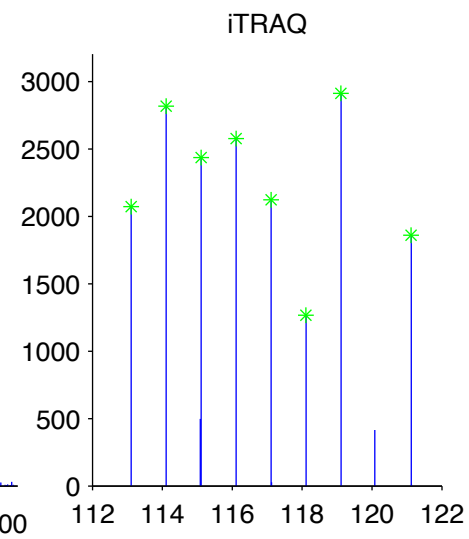

S [ S ] L [ T ] G [ S ] E [ T ] D [ N ] E [ D ] V [ y ] T [ F ] K

growth factor receptor bound protein 2-associated protein 2

Charge State: +3

Scan Number: 3835

File Name: 100827ptp1blivers\_ncHFD\_basal.raw

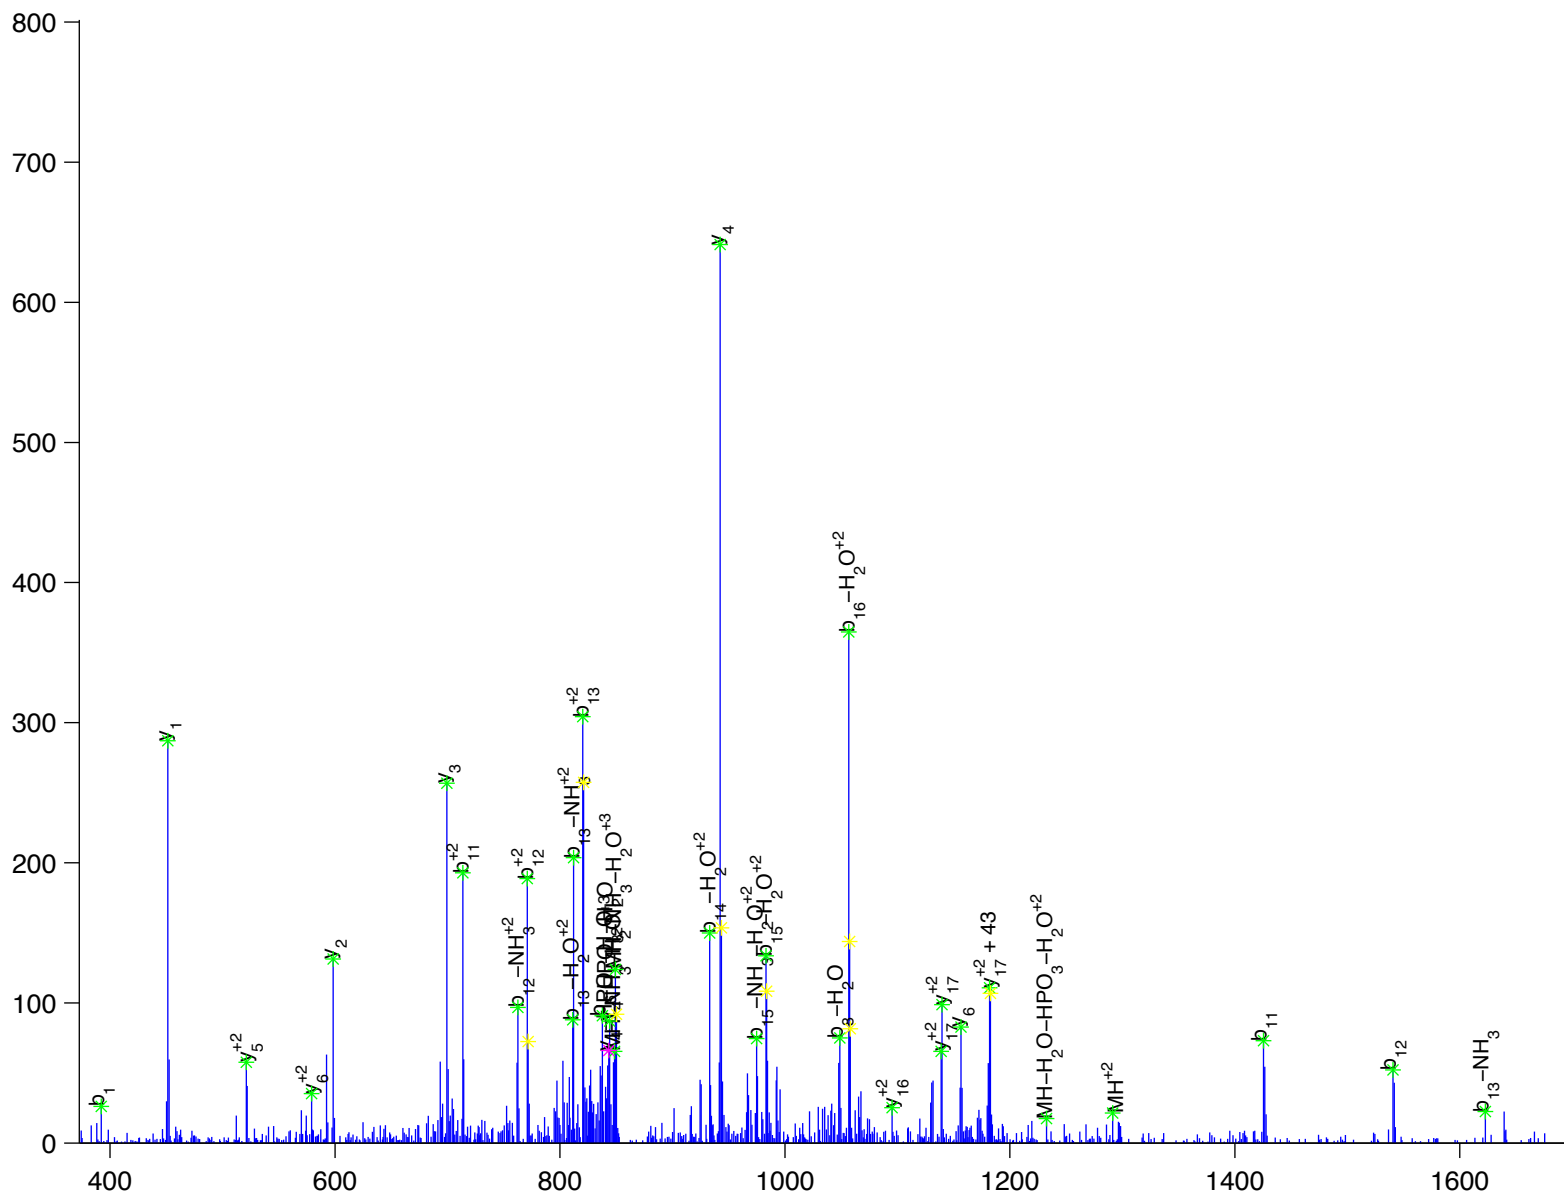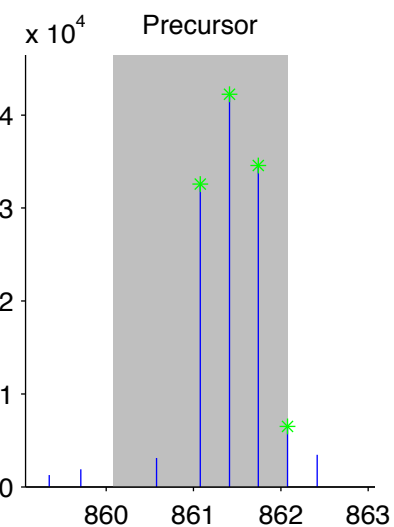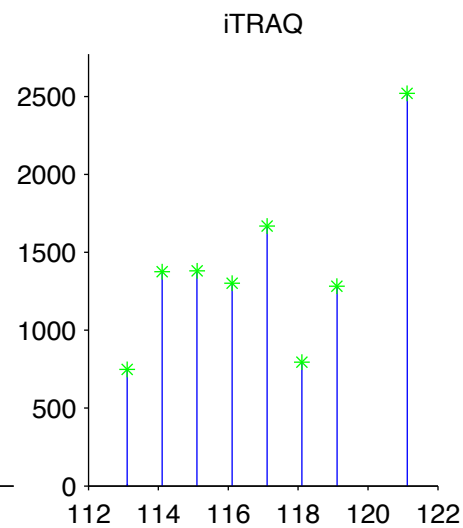

S [ V ] [ L ] [ G ] [ N ] [ N ] [ F ] [ y ] [ E ] [ Y ] [ Y ] [ V ] [ N ] [ D ] [ P ] [ P ] [ R ]

GTP cyclohydrolase I feedback regulator

Charge State: +3

Scan Number: 5672

File Name: 090728ptp1blivers\_M\_NC\_ins\_e.raw

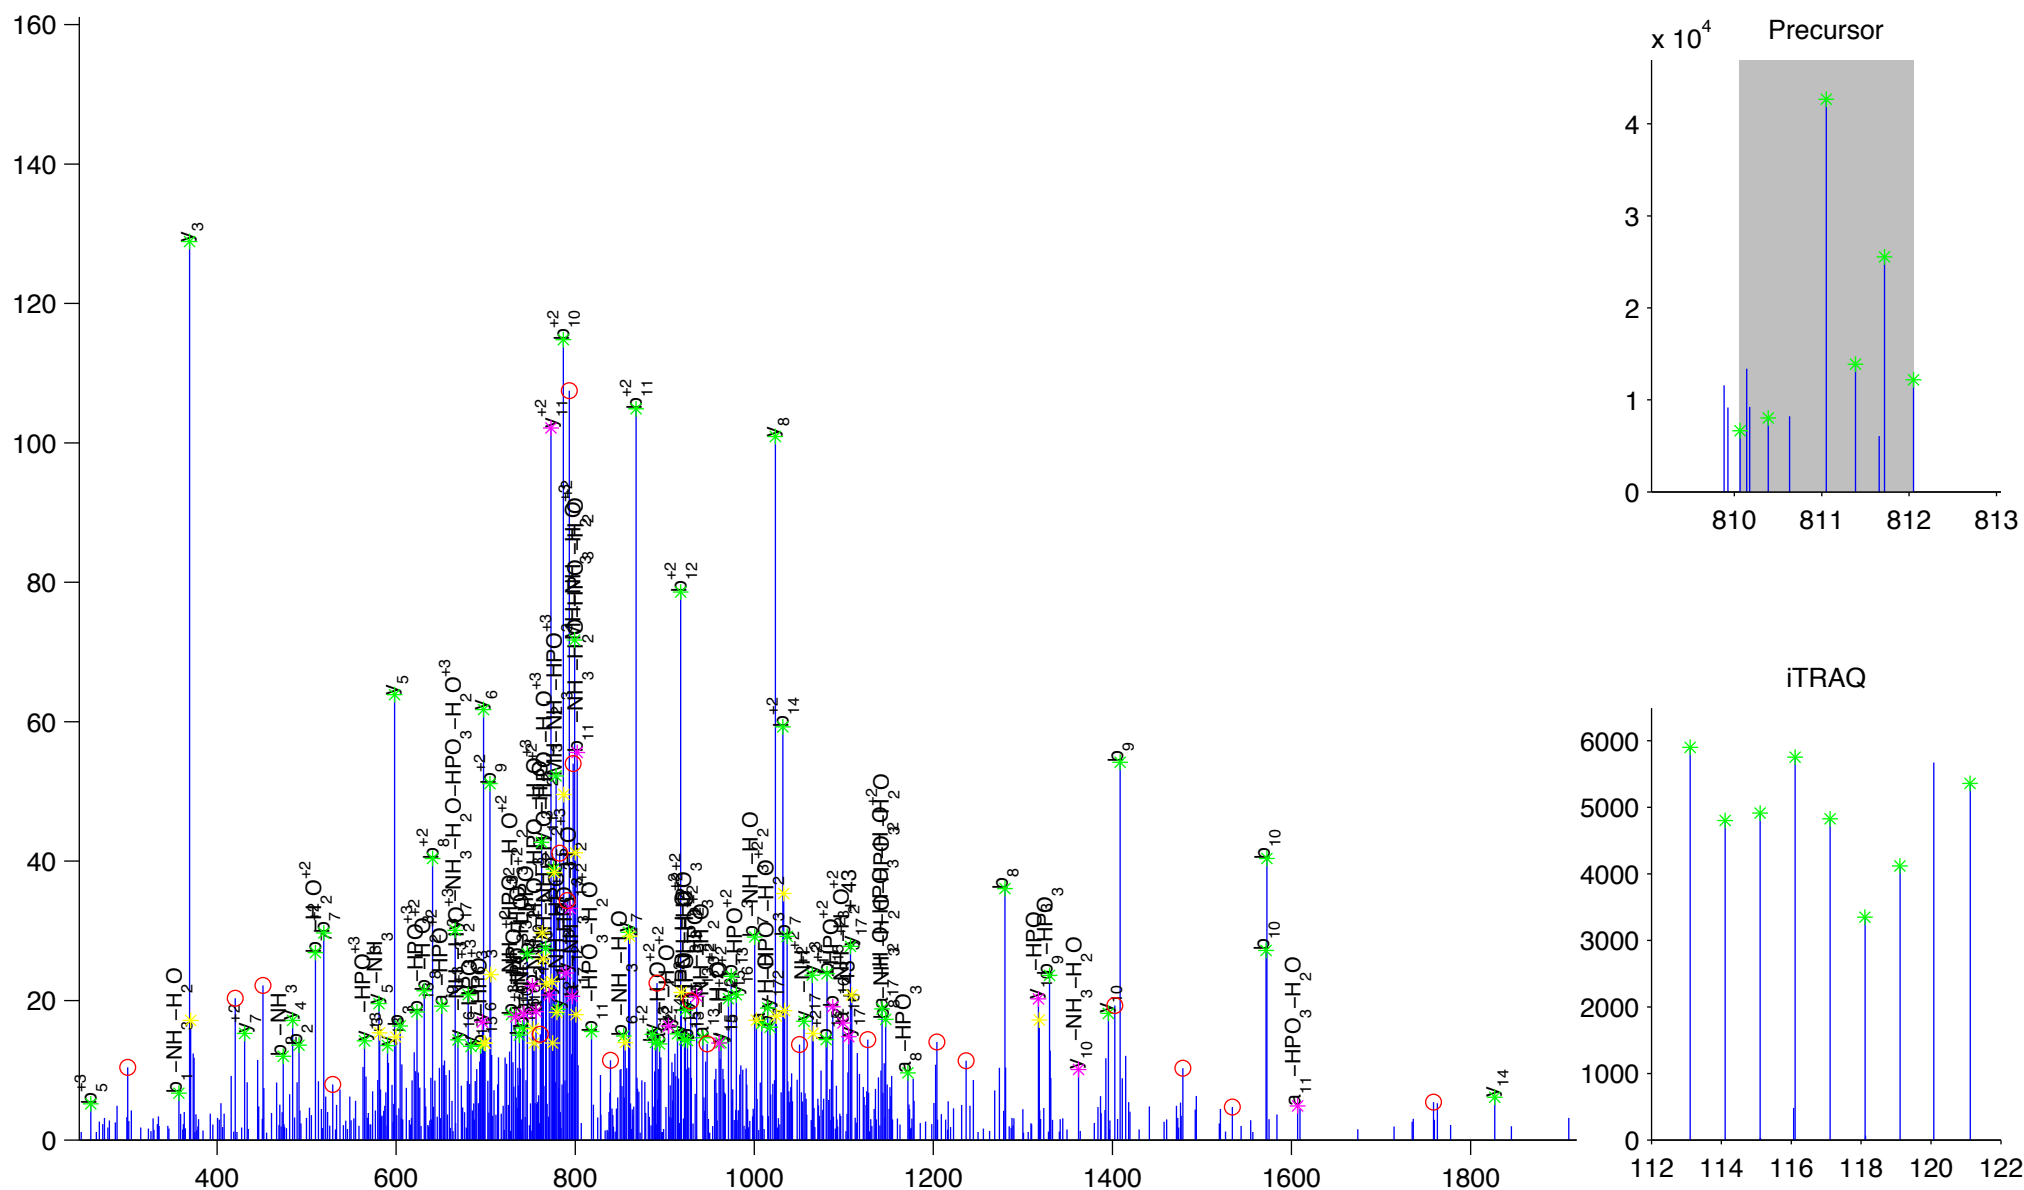

V L L P E y G G T K

heat shock protein 1 (chaperonin 10)

Charge State: +3

Scan Number: 4908

File Name: 100908ptp1blivers\_ncHFD3\_basal.raw

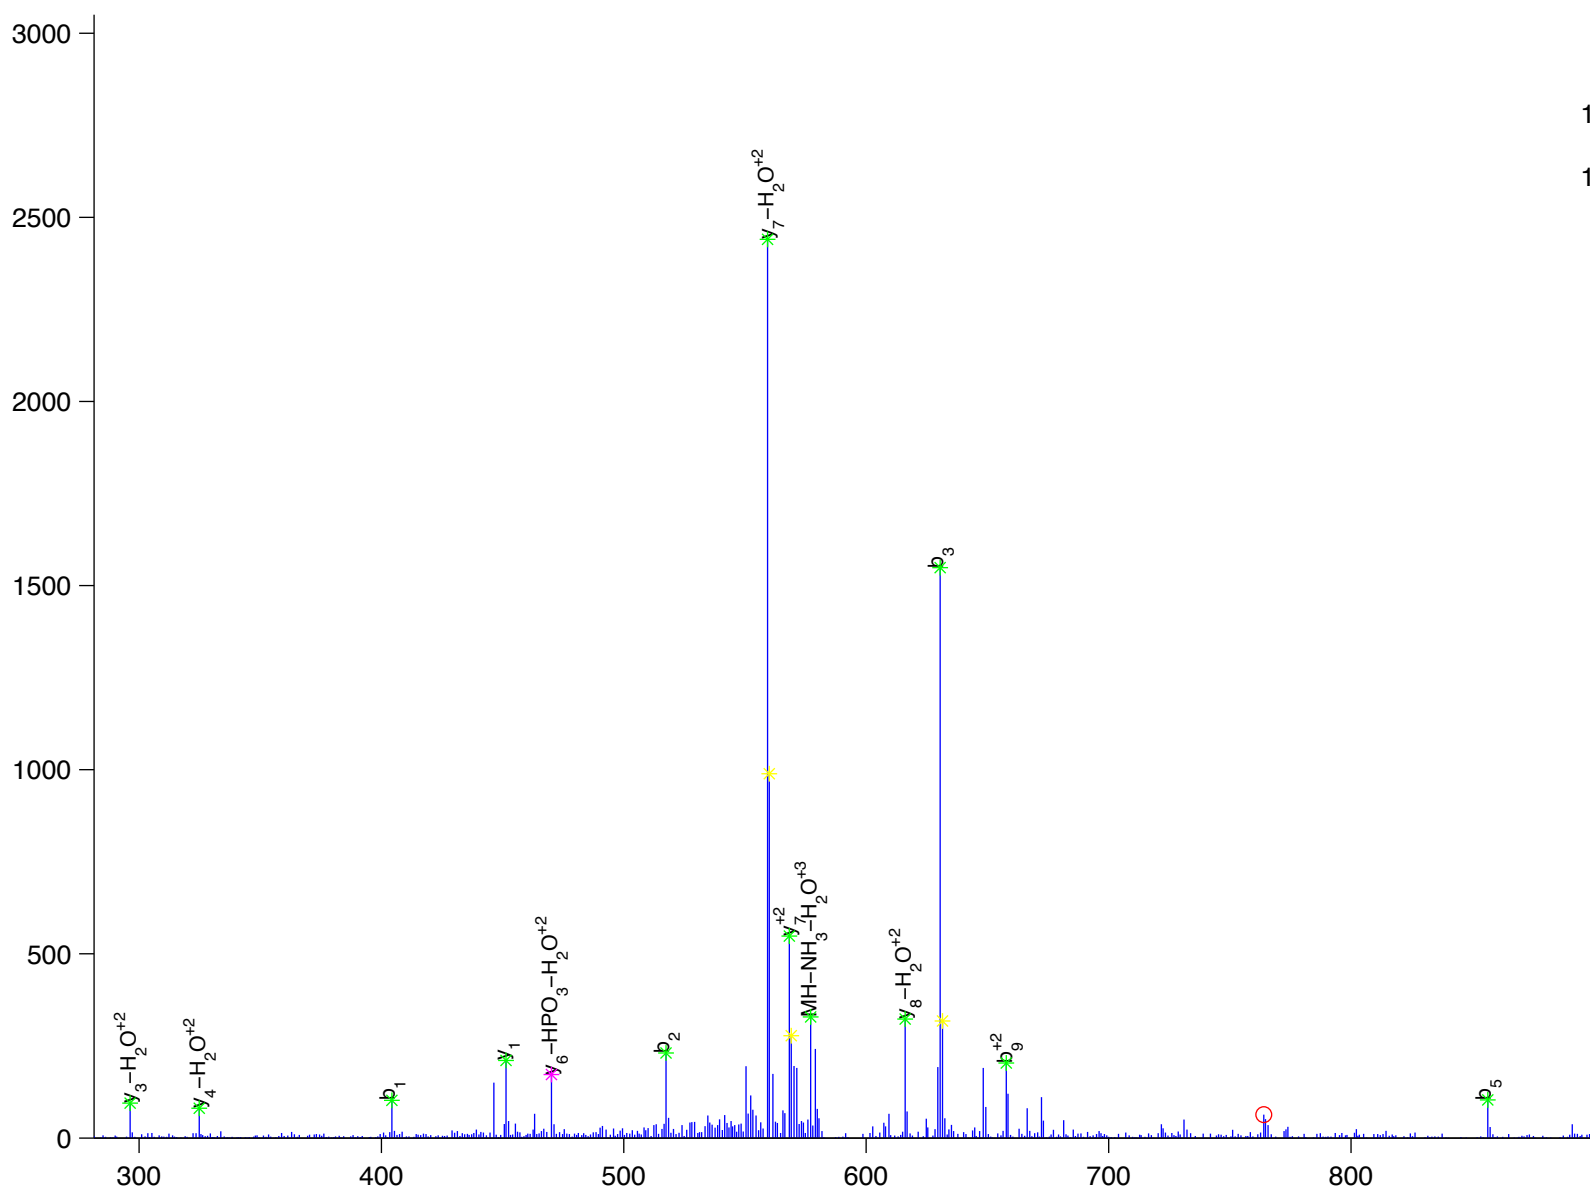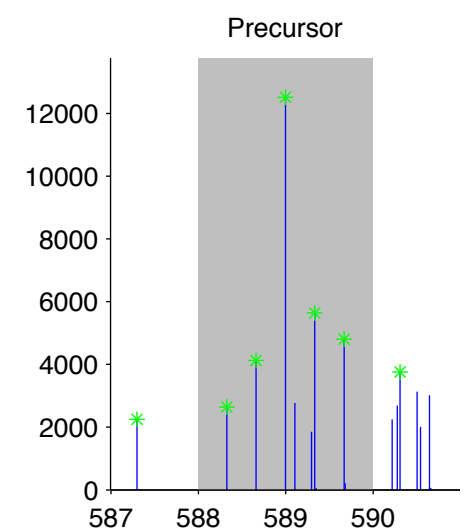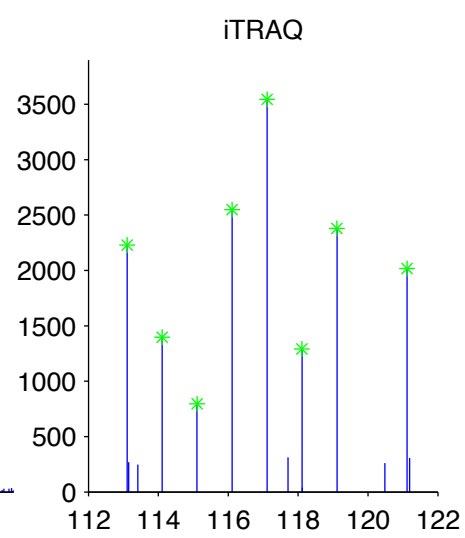

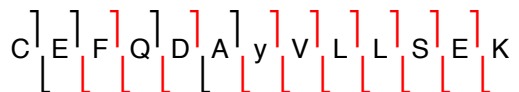

heat shock protein 1 (chaperonin)

Charge State: +3

Scan Number: 5991

File Name: 090728ptp1blivers\_M\_NC\_ins\_e.raw

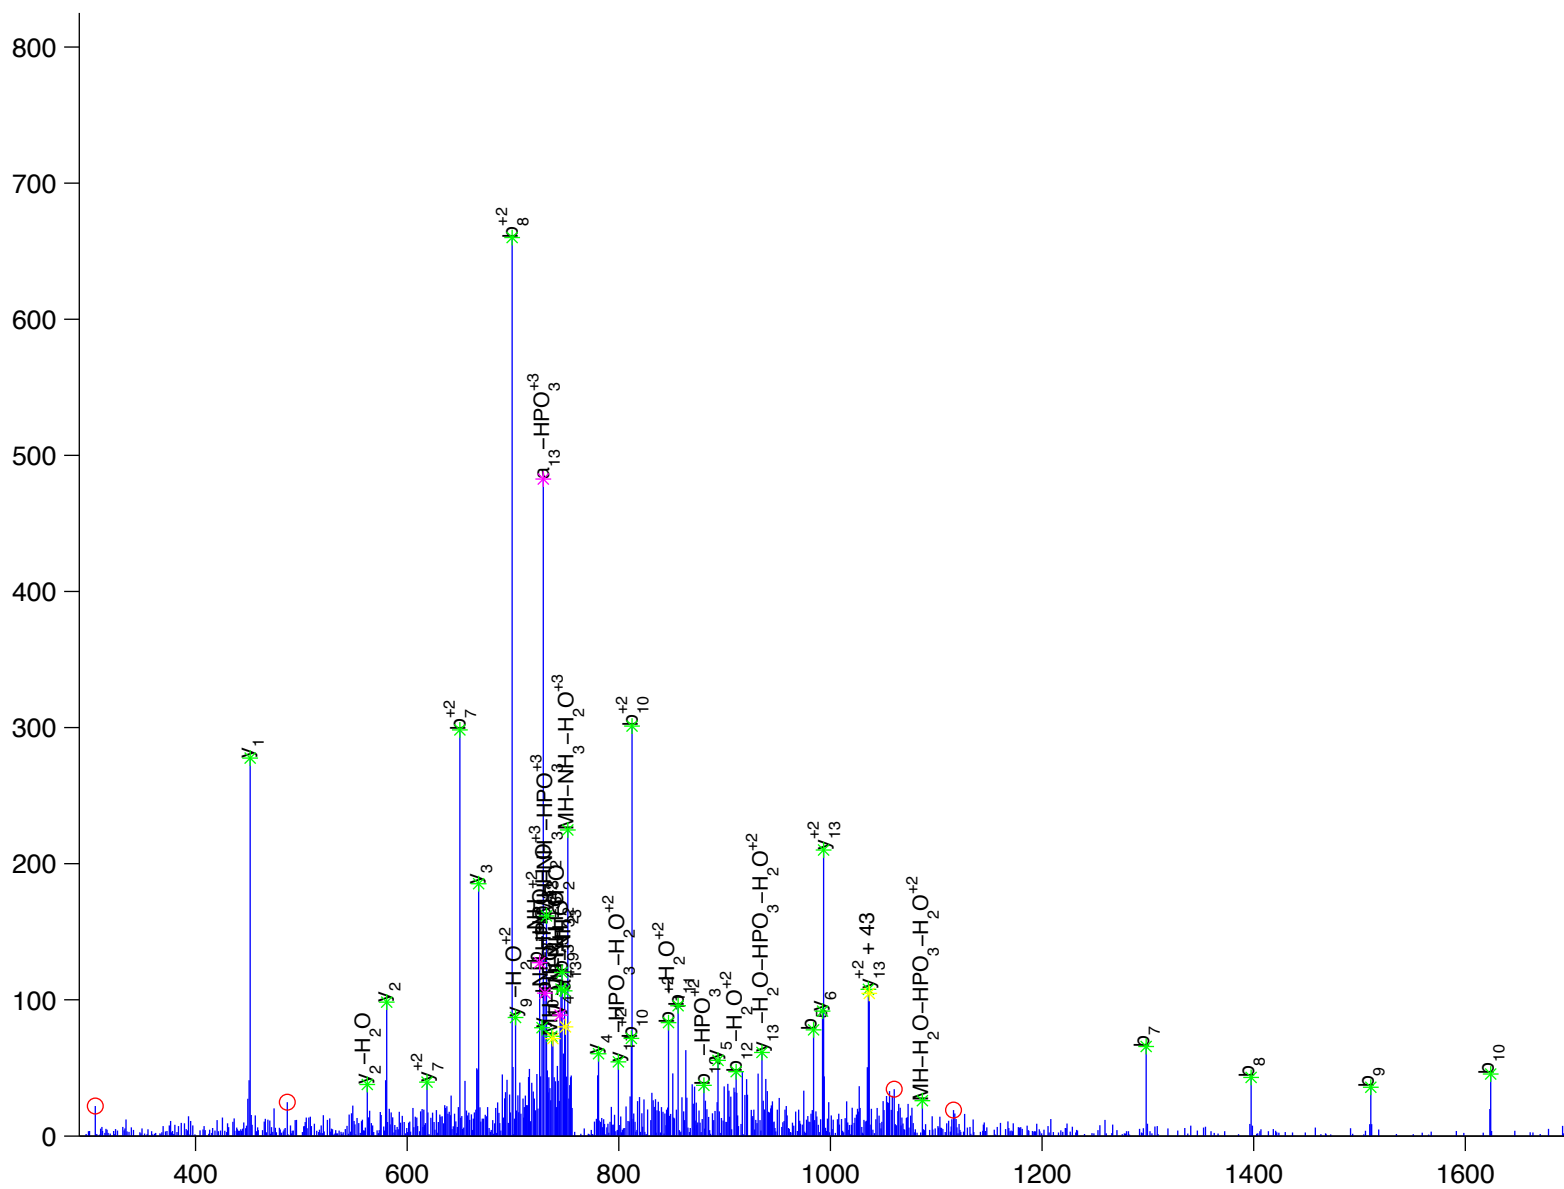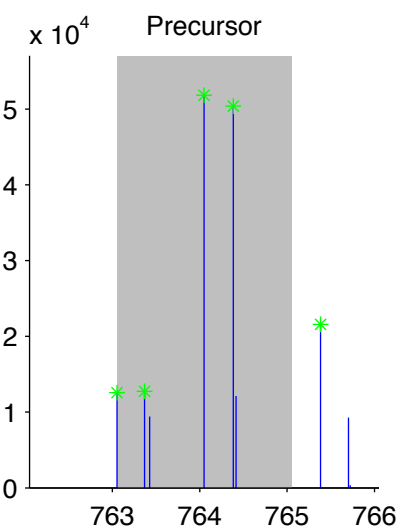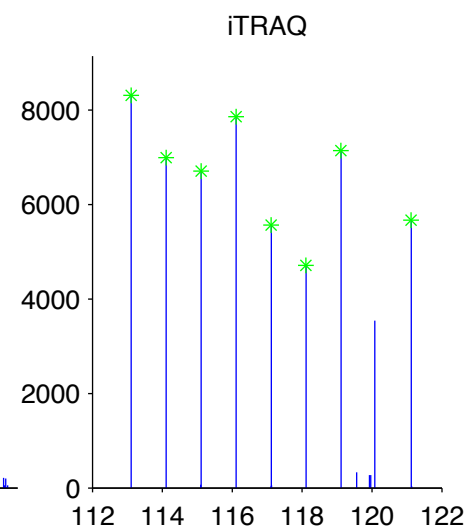

I [ Q ] E [ I ] T [ E ] Q [ L ] D [ I ] T [ T ] S [ E ] y [ E ] K [ E ] K [

heat shock protein 1 (chaperonin)

Charge State: +4

Scan Number: 6435

File Name: 100908ptp1blivers\_ncHFD3\_basal.raw

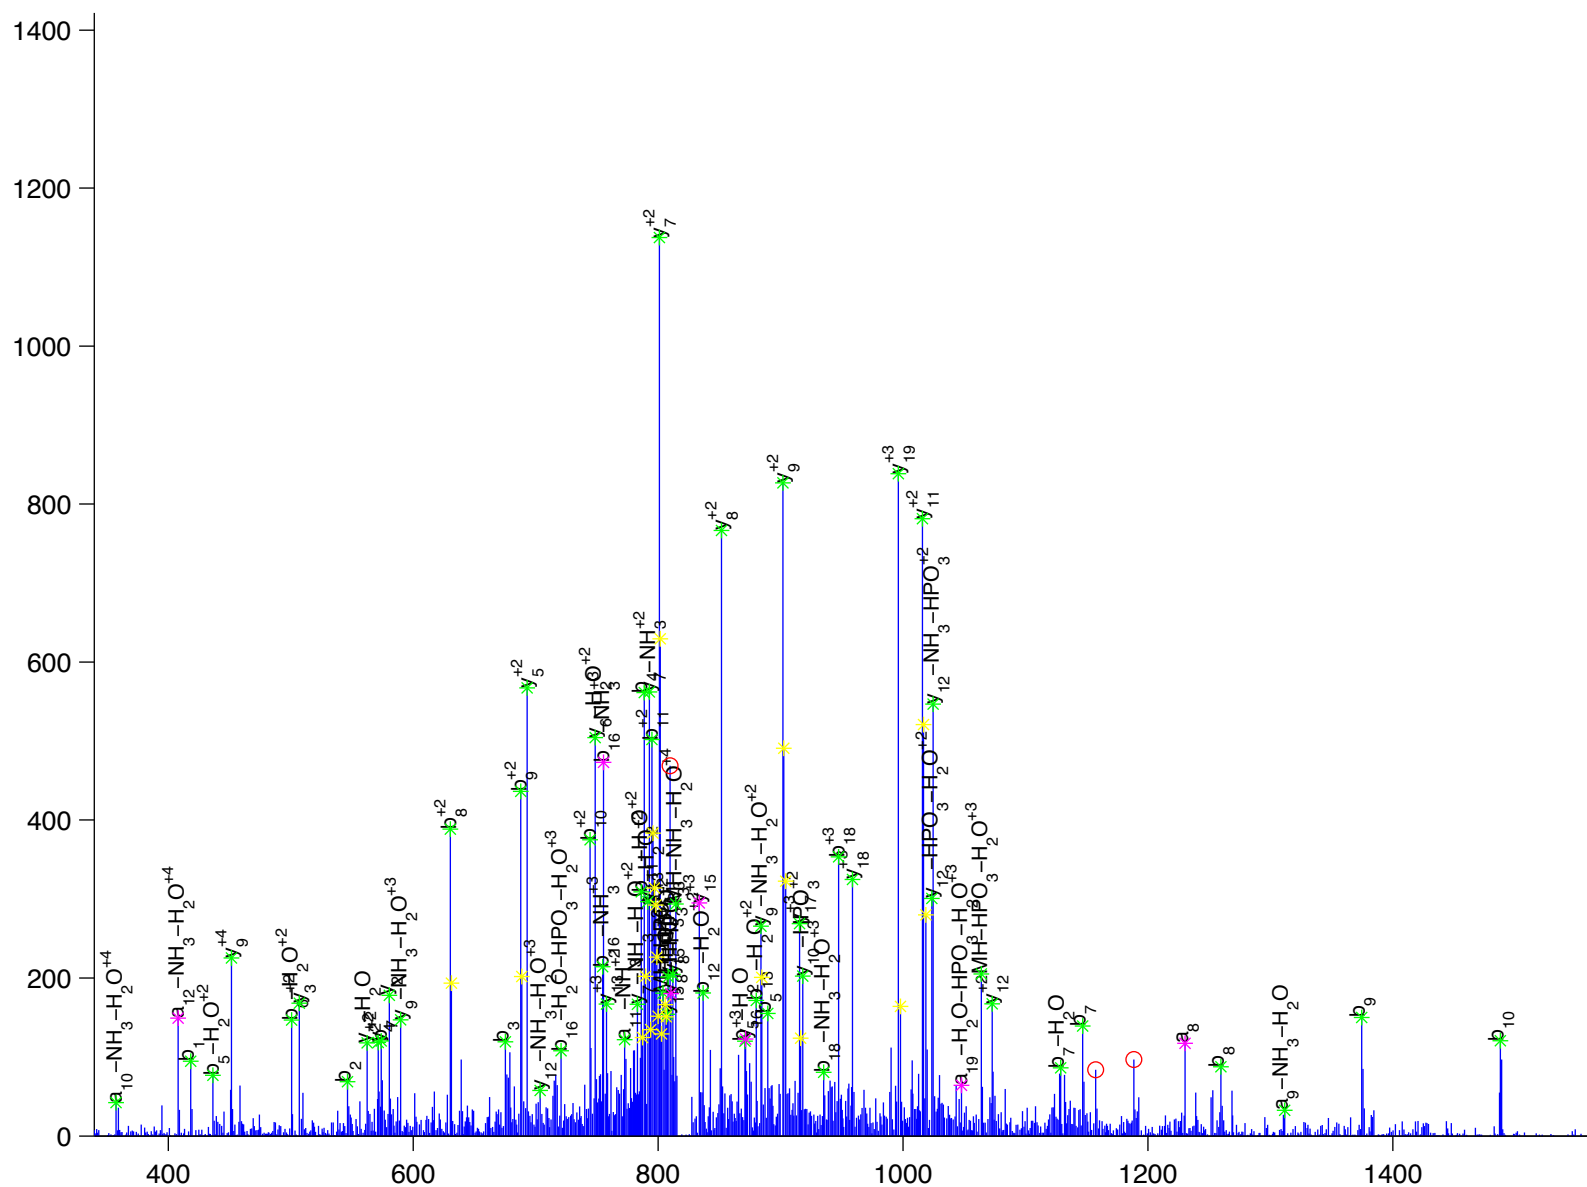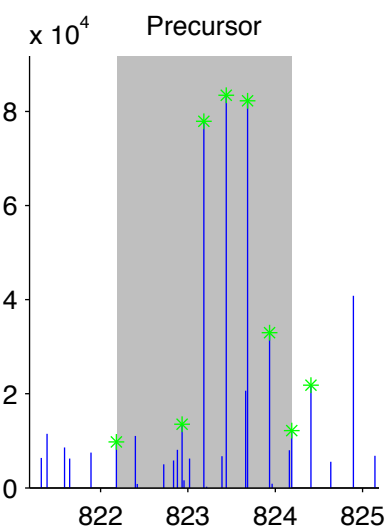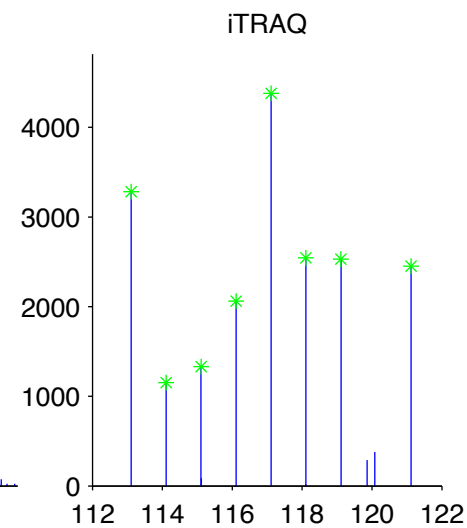

y I D Q E E L N K

heat shock protein 1, alpha

Charge State: +3

Scan Number: 3293

File Name: 100827ptp1blivers\_ncHFD\_basal.raw

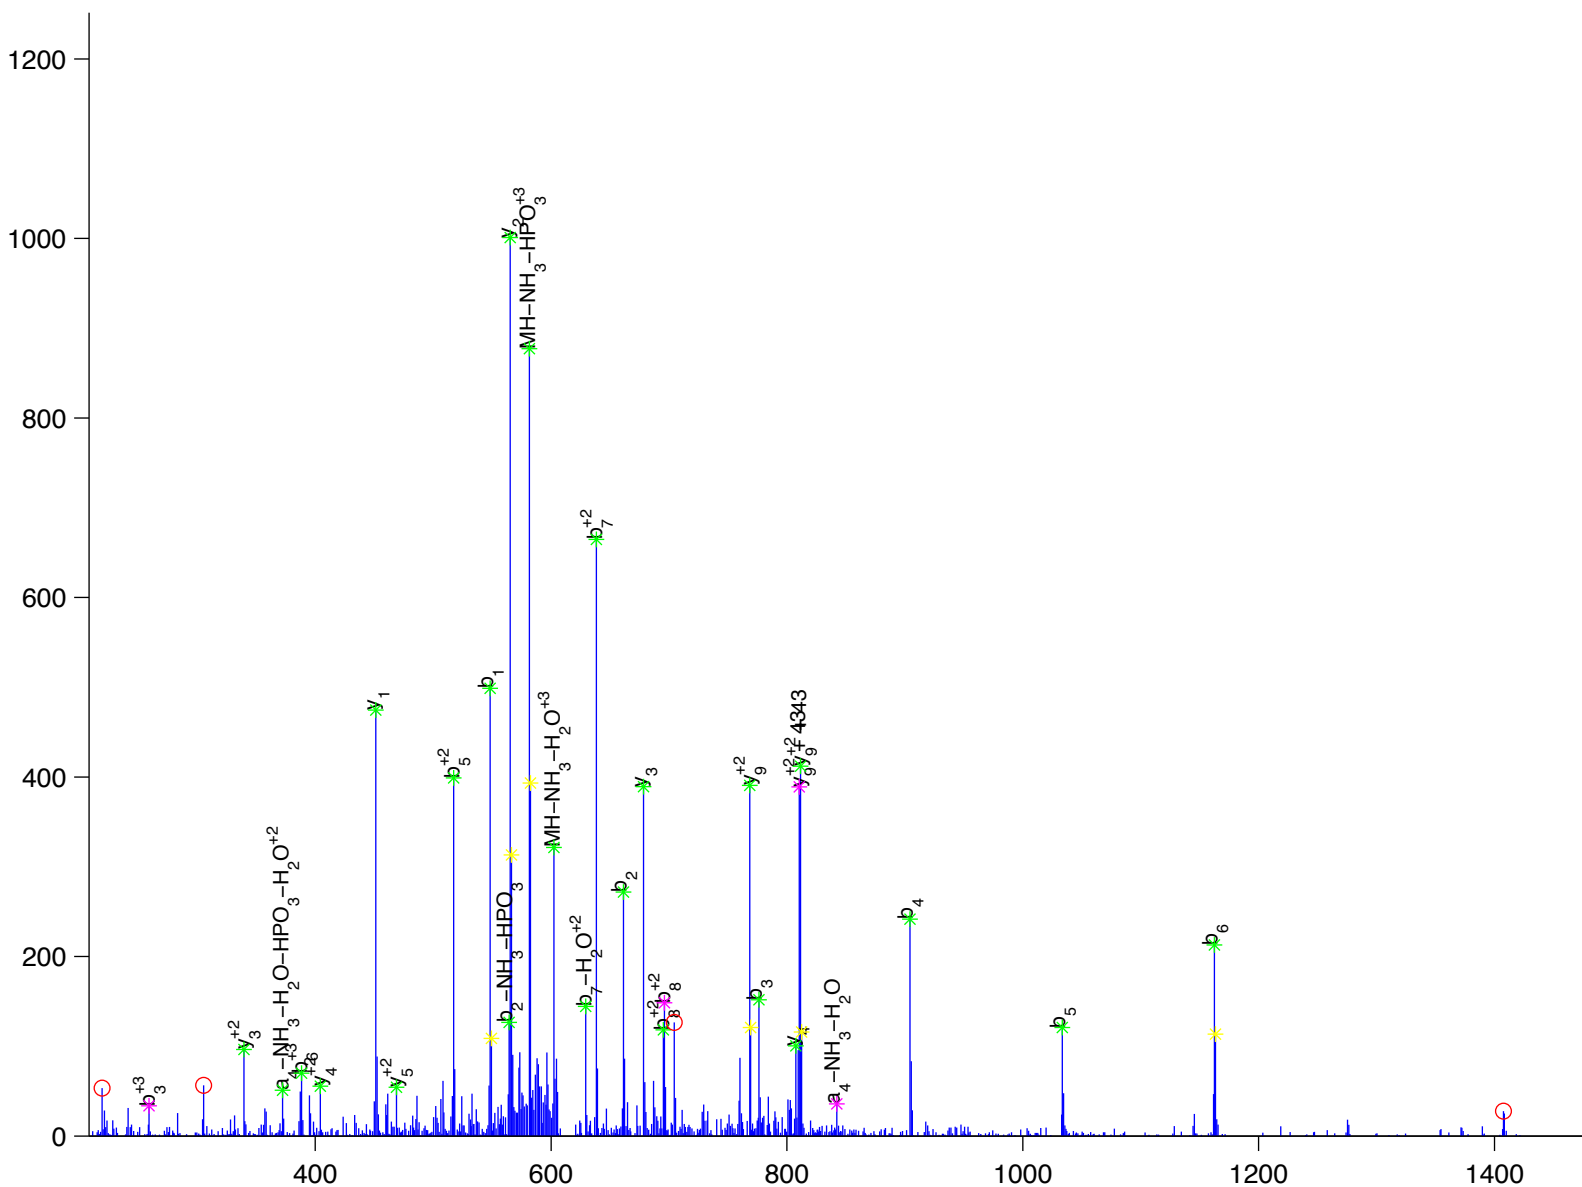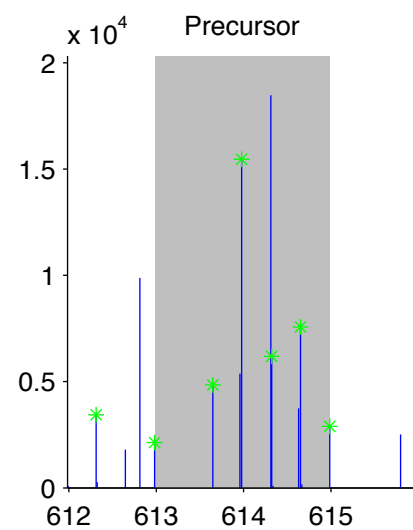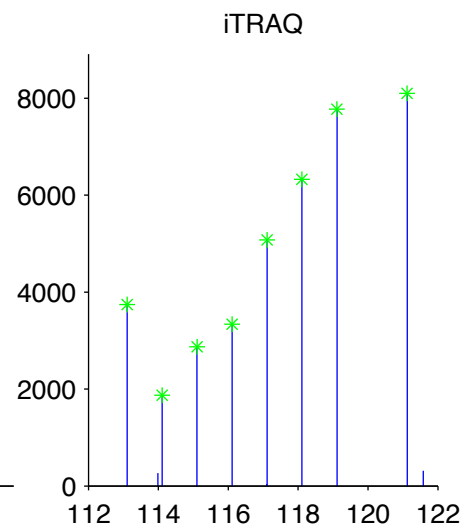



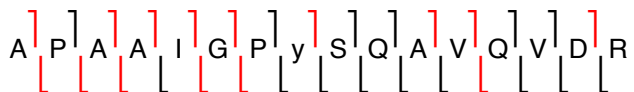

heat-responsive protein 12

Charge State: +2

Scan Number: 3813

File Name: 090728ptp1blivers\_M\_NC\_ins\_e.raw

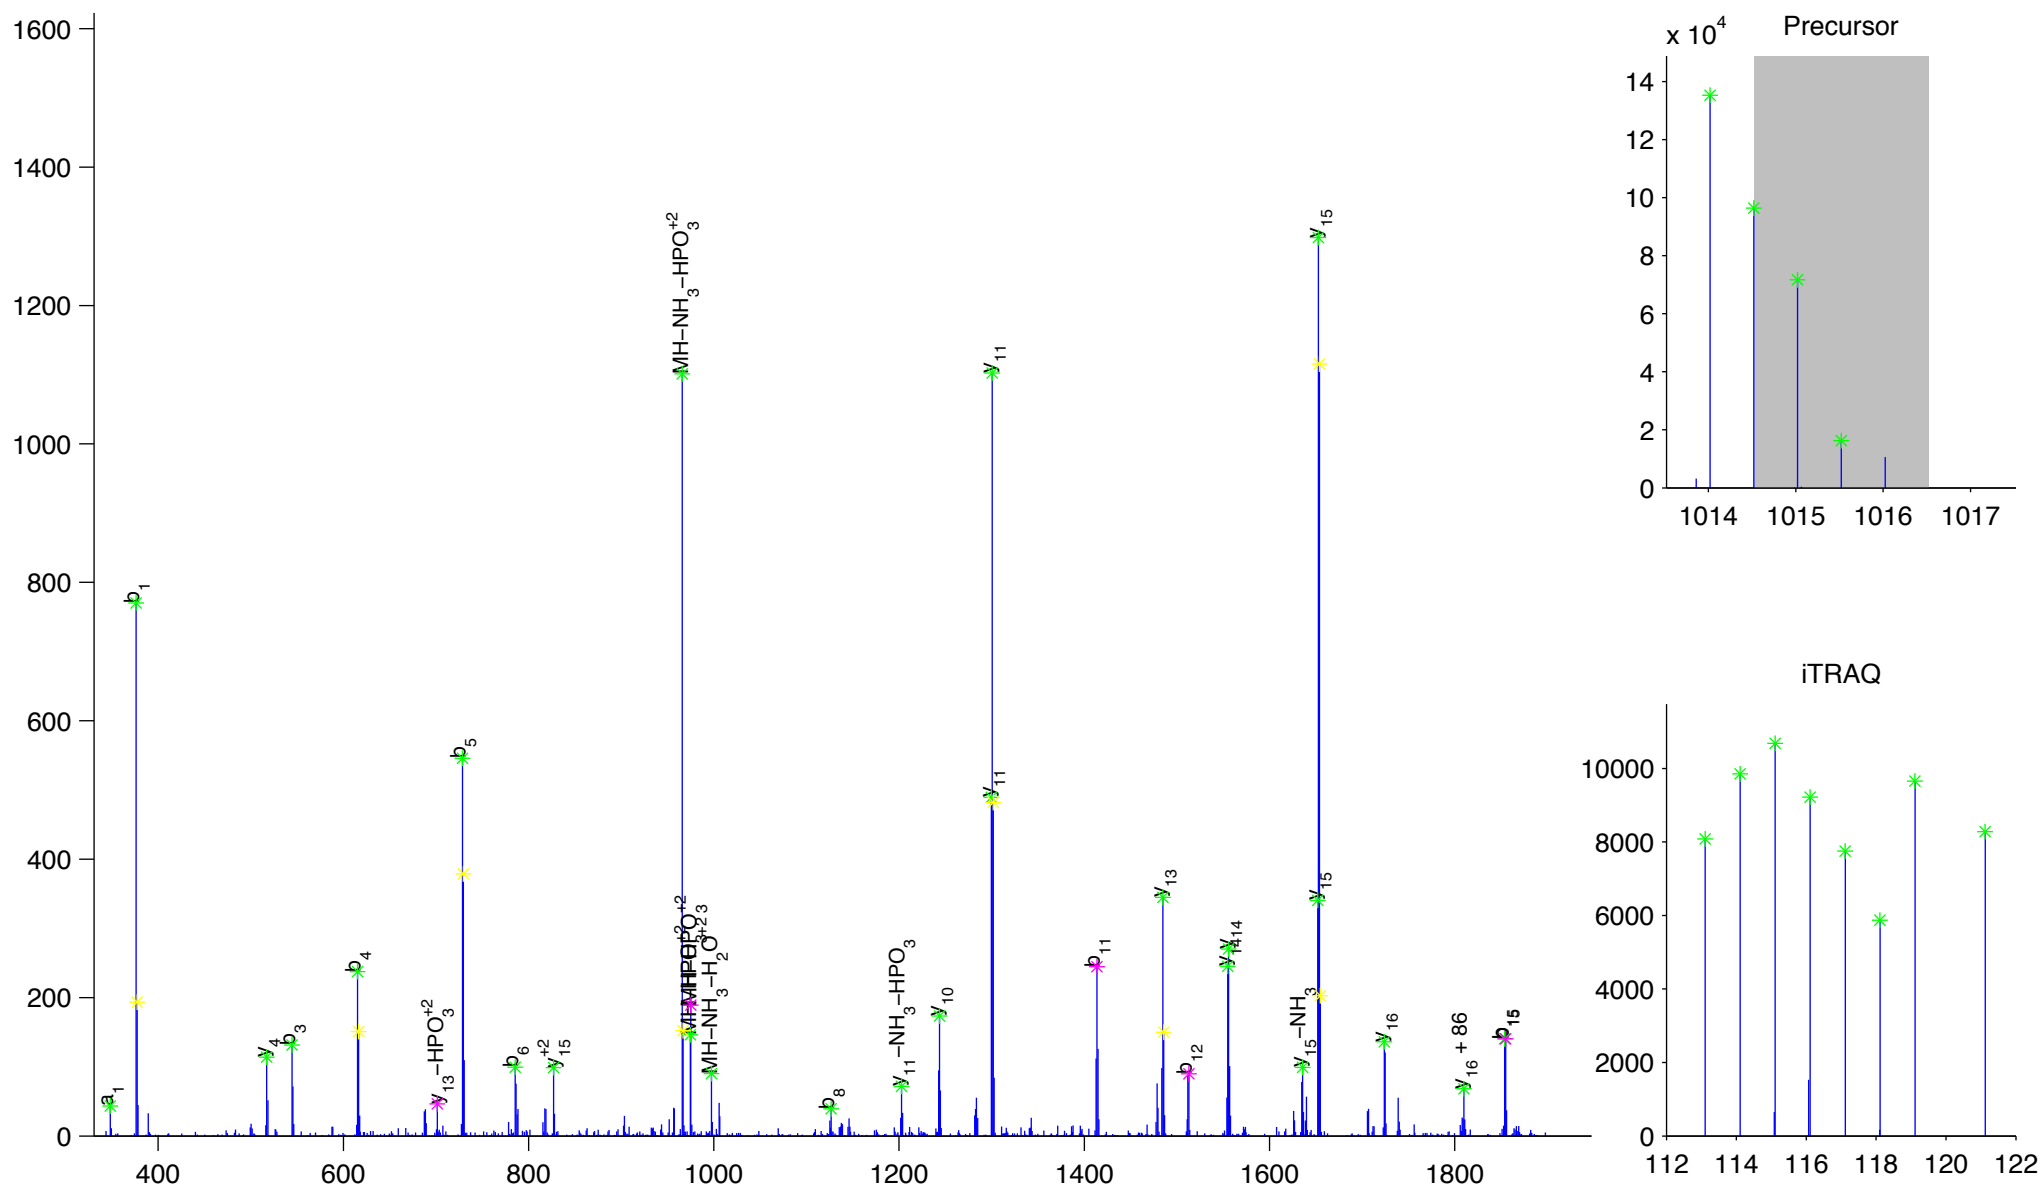

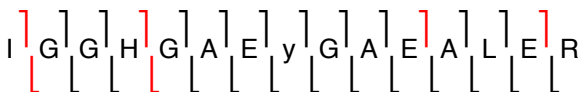

hemoglobin alpha 1 chain

Charge State: +2

Scan Number: 5317

File Name: 090807ptp1blivers\_M\_HFD\_basal.raw

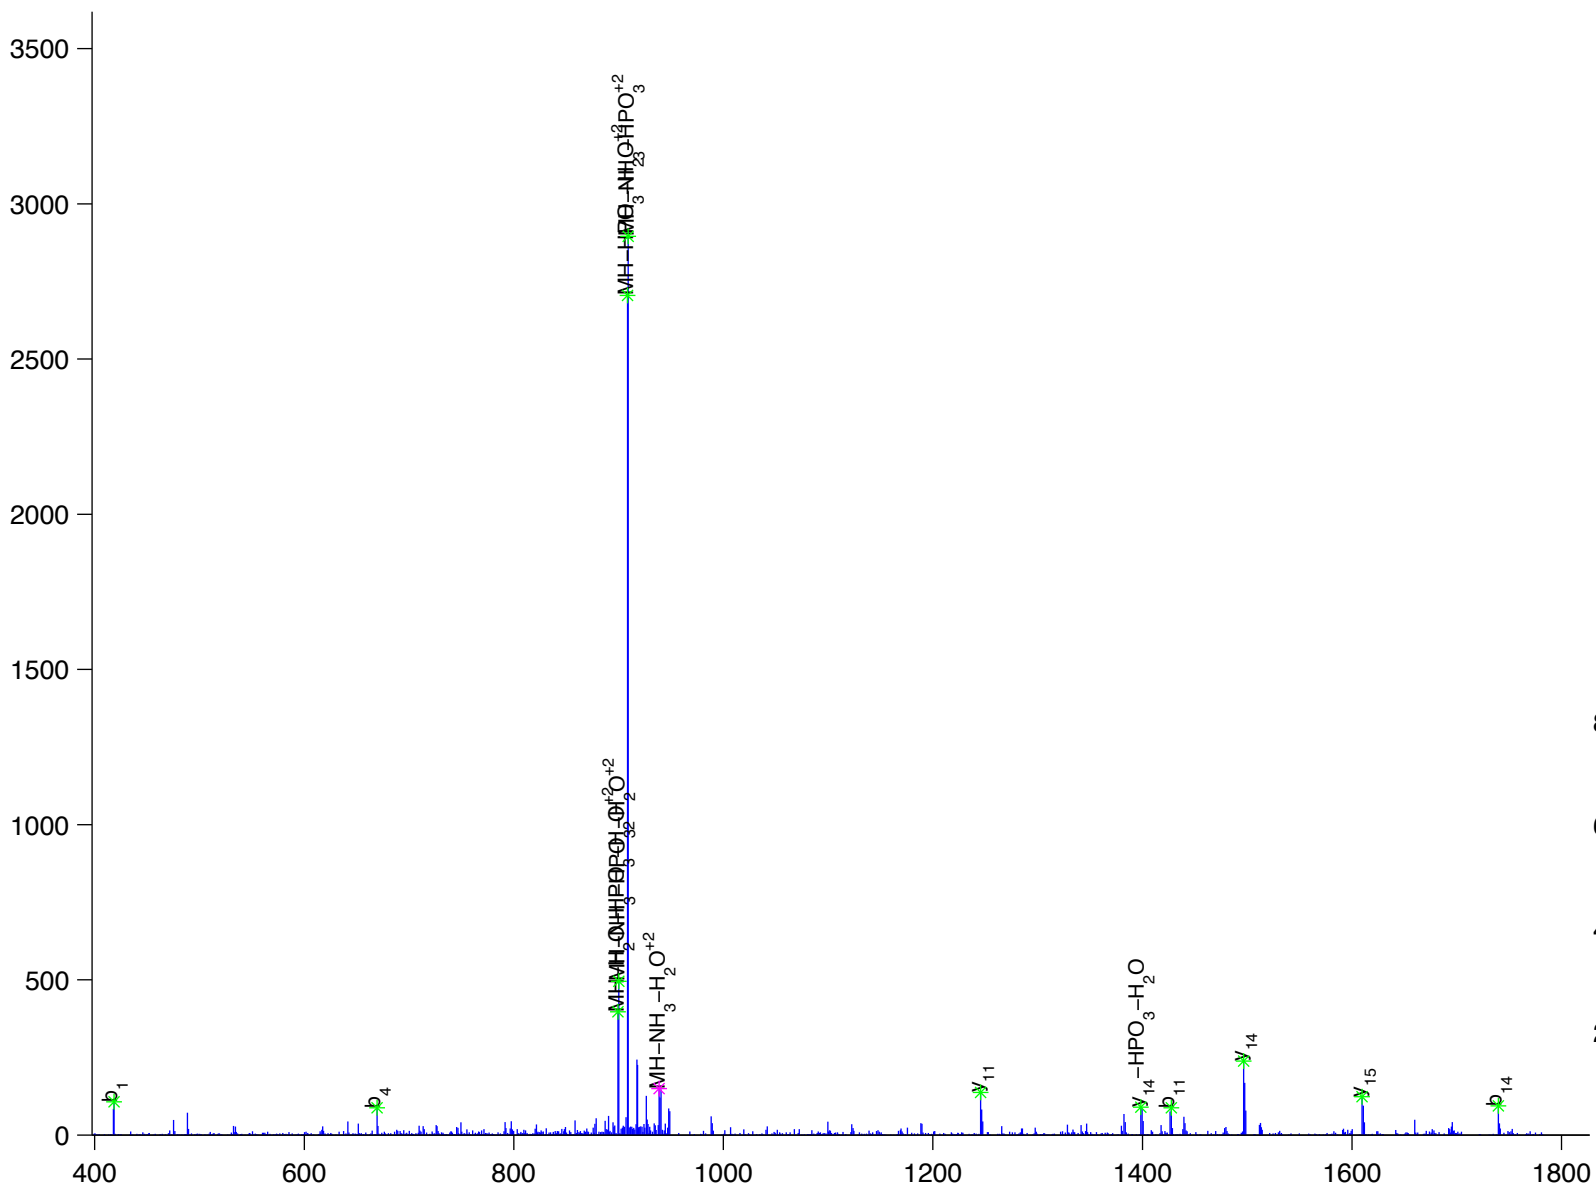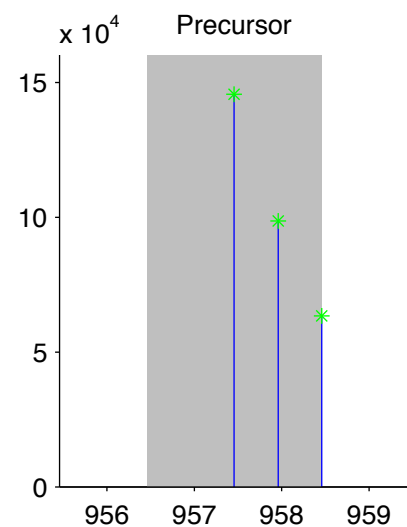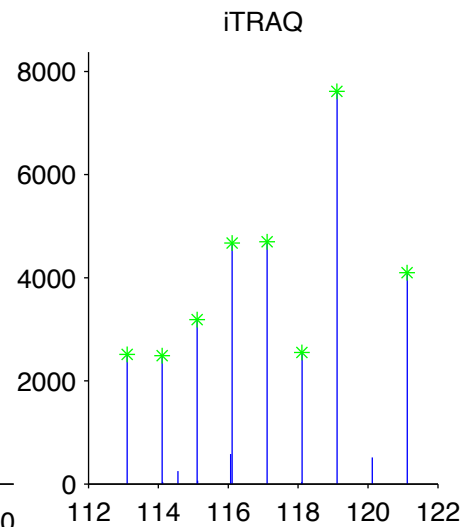

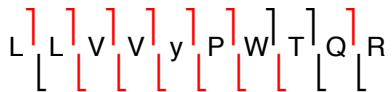

hemoglobin, beta adult major chain

Charge State: +3

Scan Number: 4175

File Name: HJ072909\_HFD\_E1\_2.raw

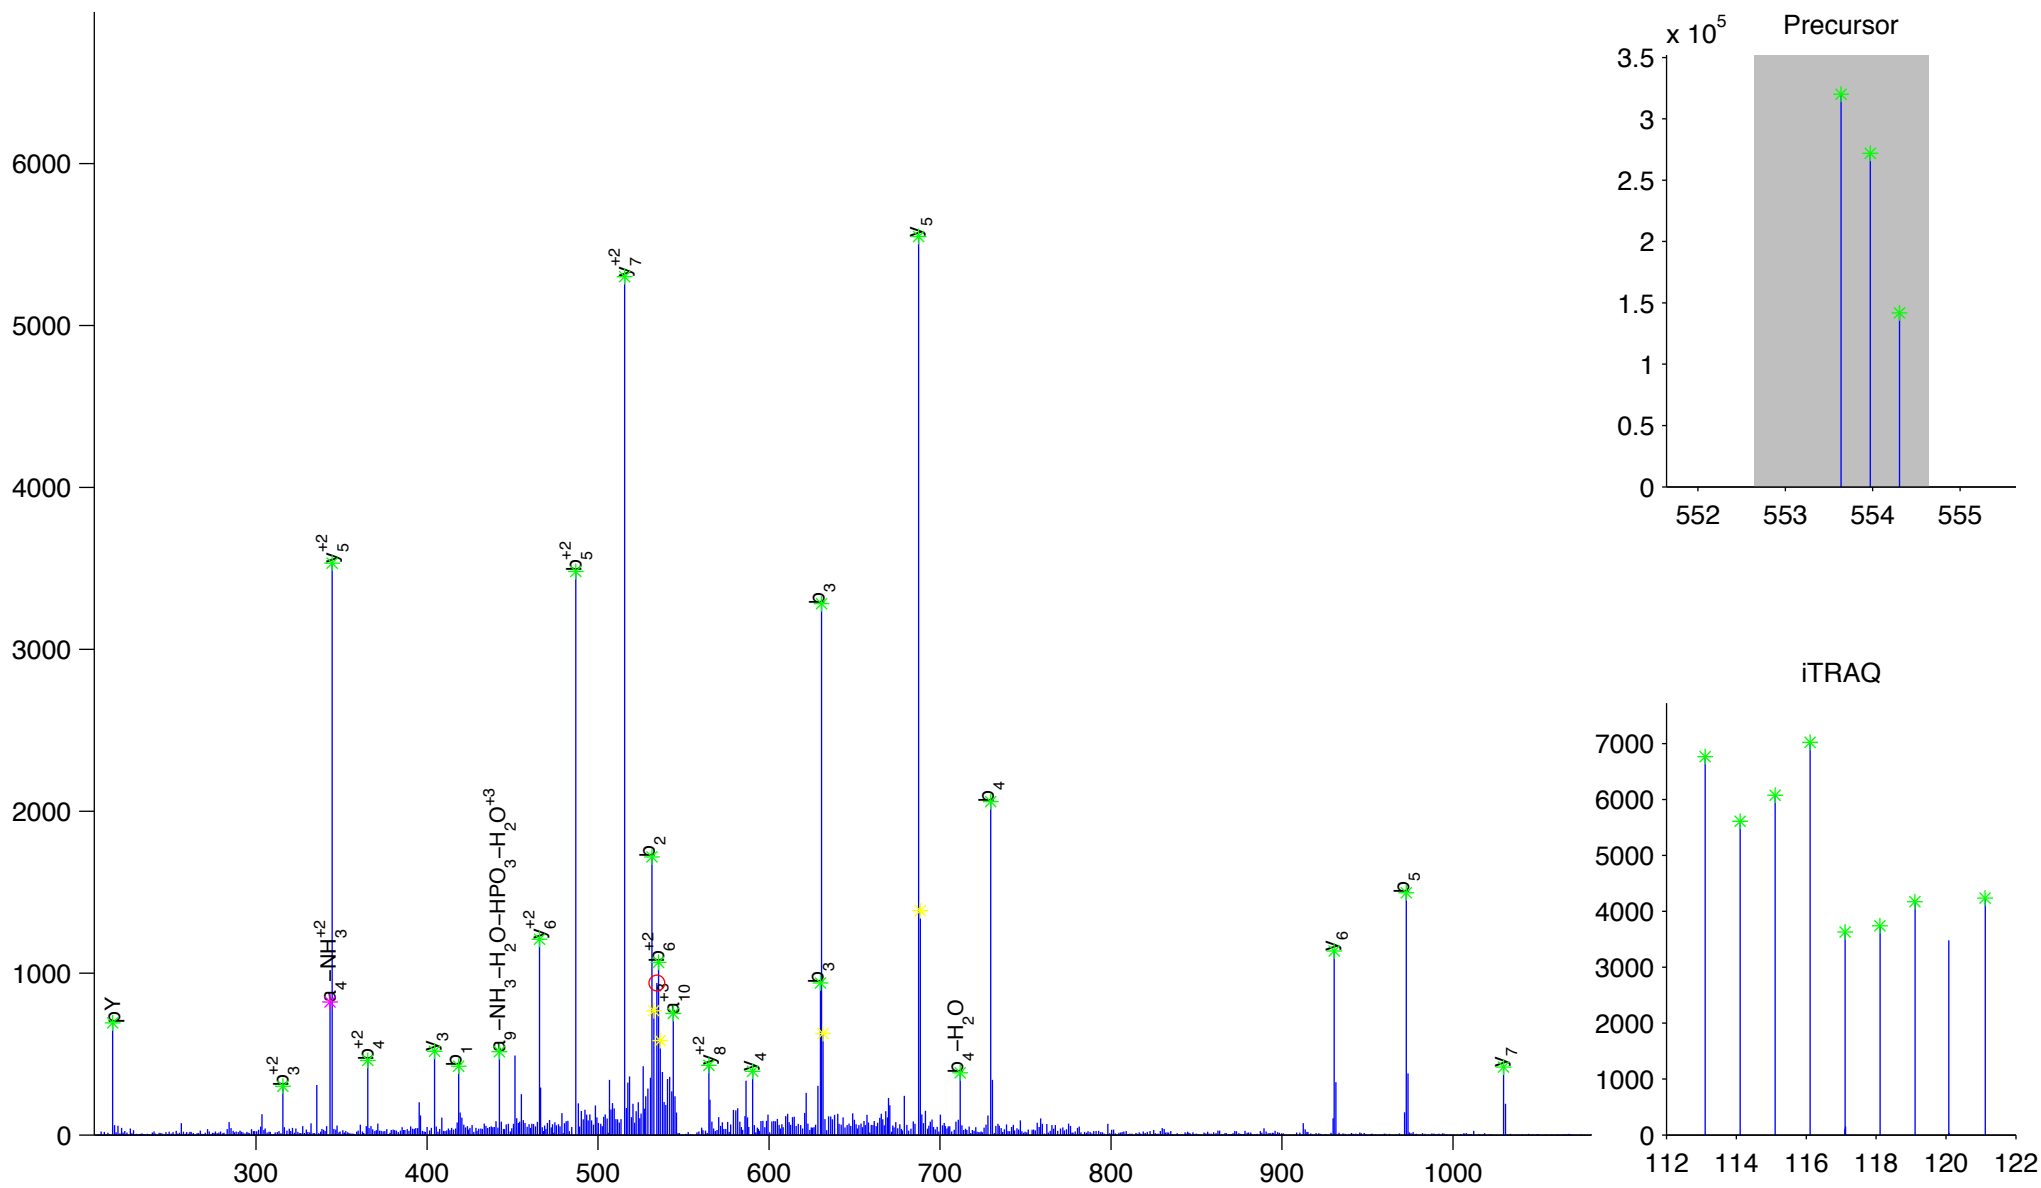

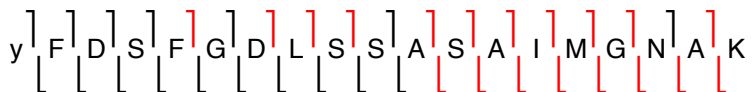

hemoglobin, beta adult major chain

Charge State: +3

Scan Number: 9176

File Name: 090806ptp1blivers\_M\_NC2.raw

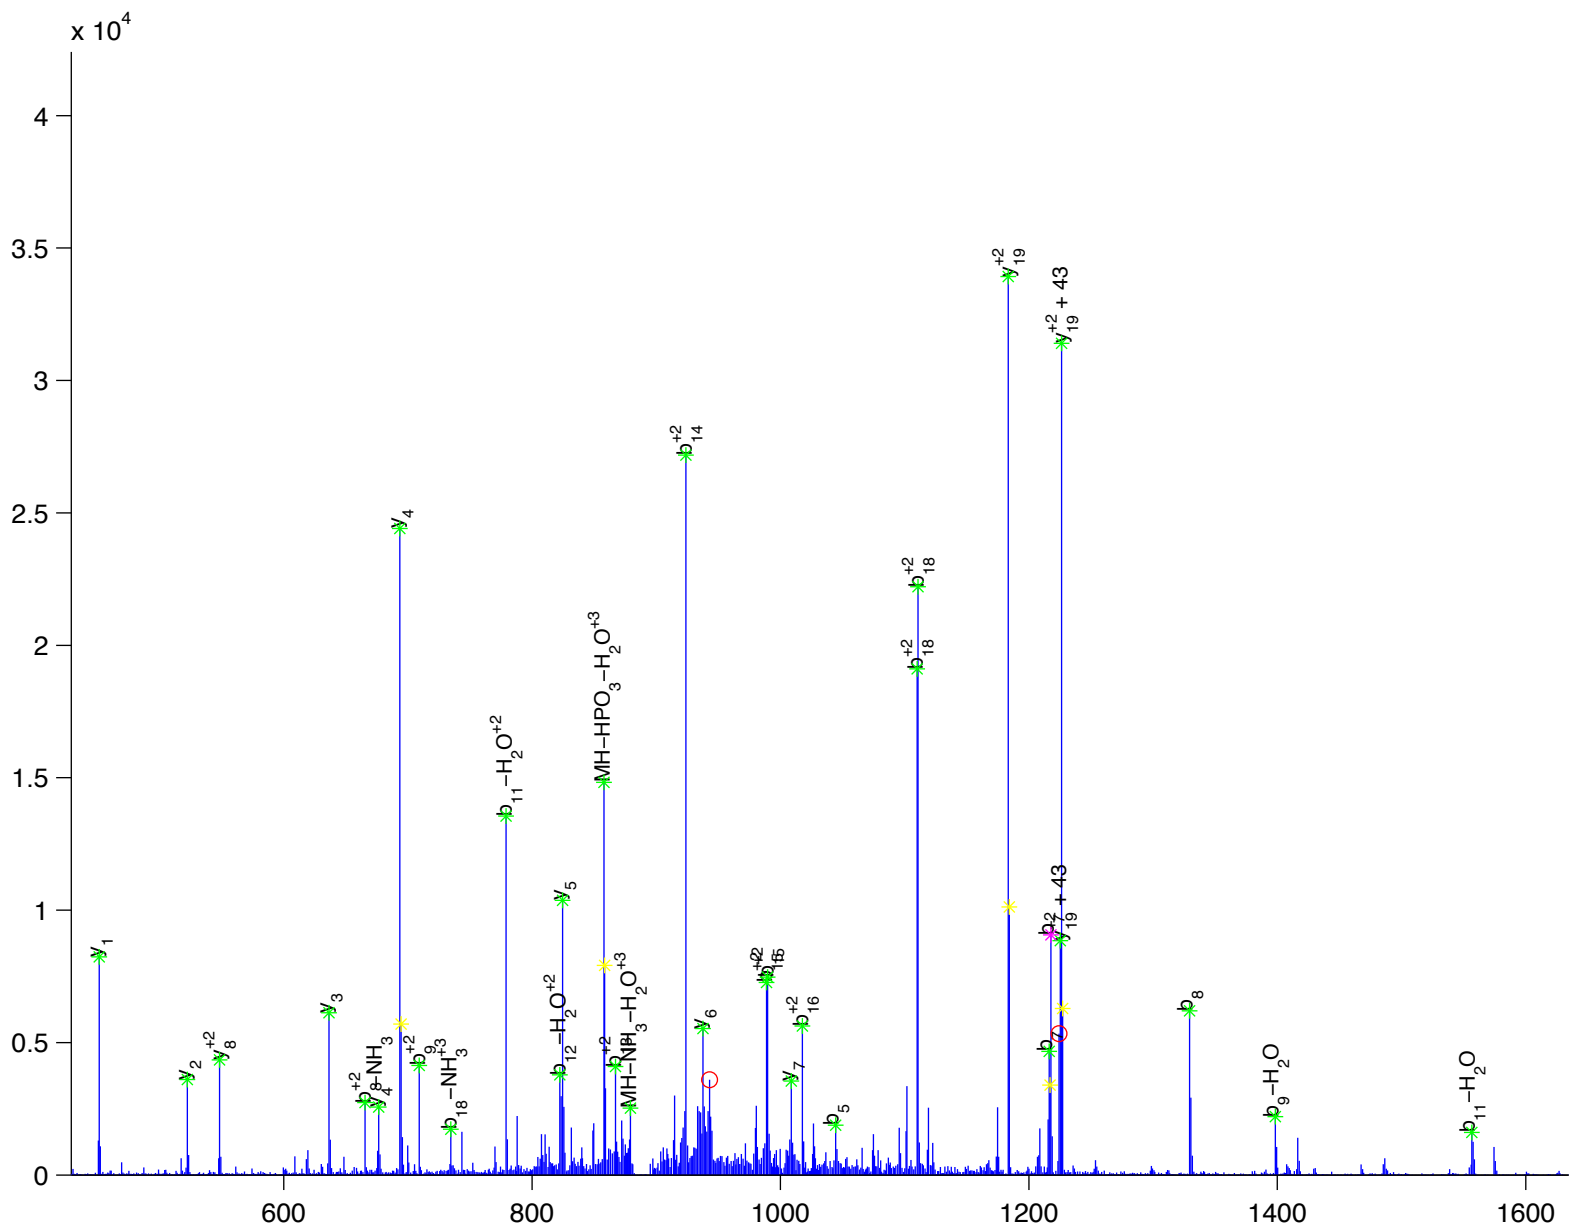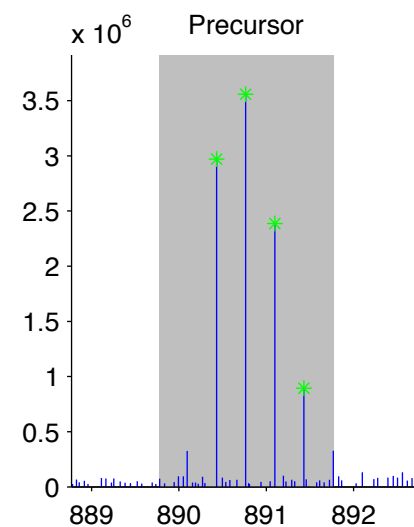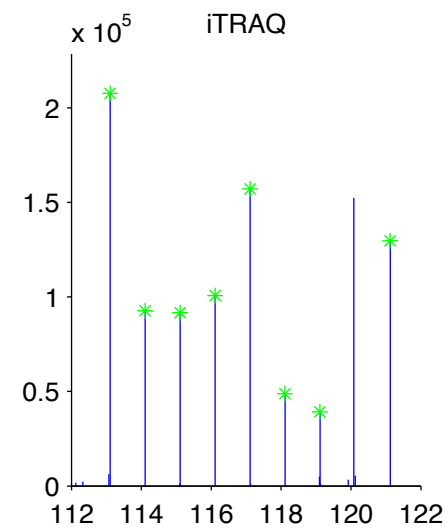

V [ C ] E [ P ] C [ y ] E [ Q ] L [ N ] K

HGF-regulated tyrosine kinase substrate

Charge State: +3

Scan Number: 4733

File Name: 091130ptp1blivers\_hfd\_basal2.raw

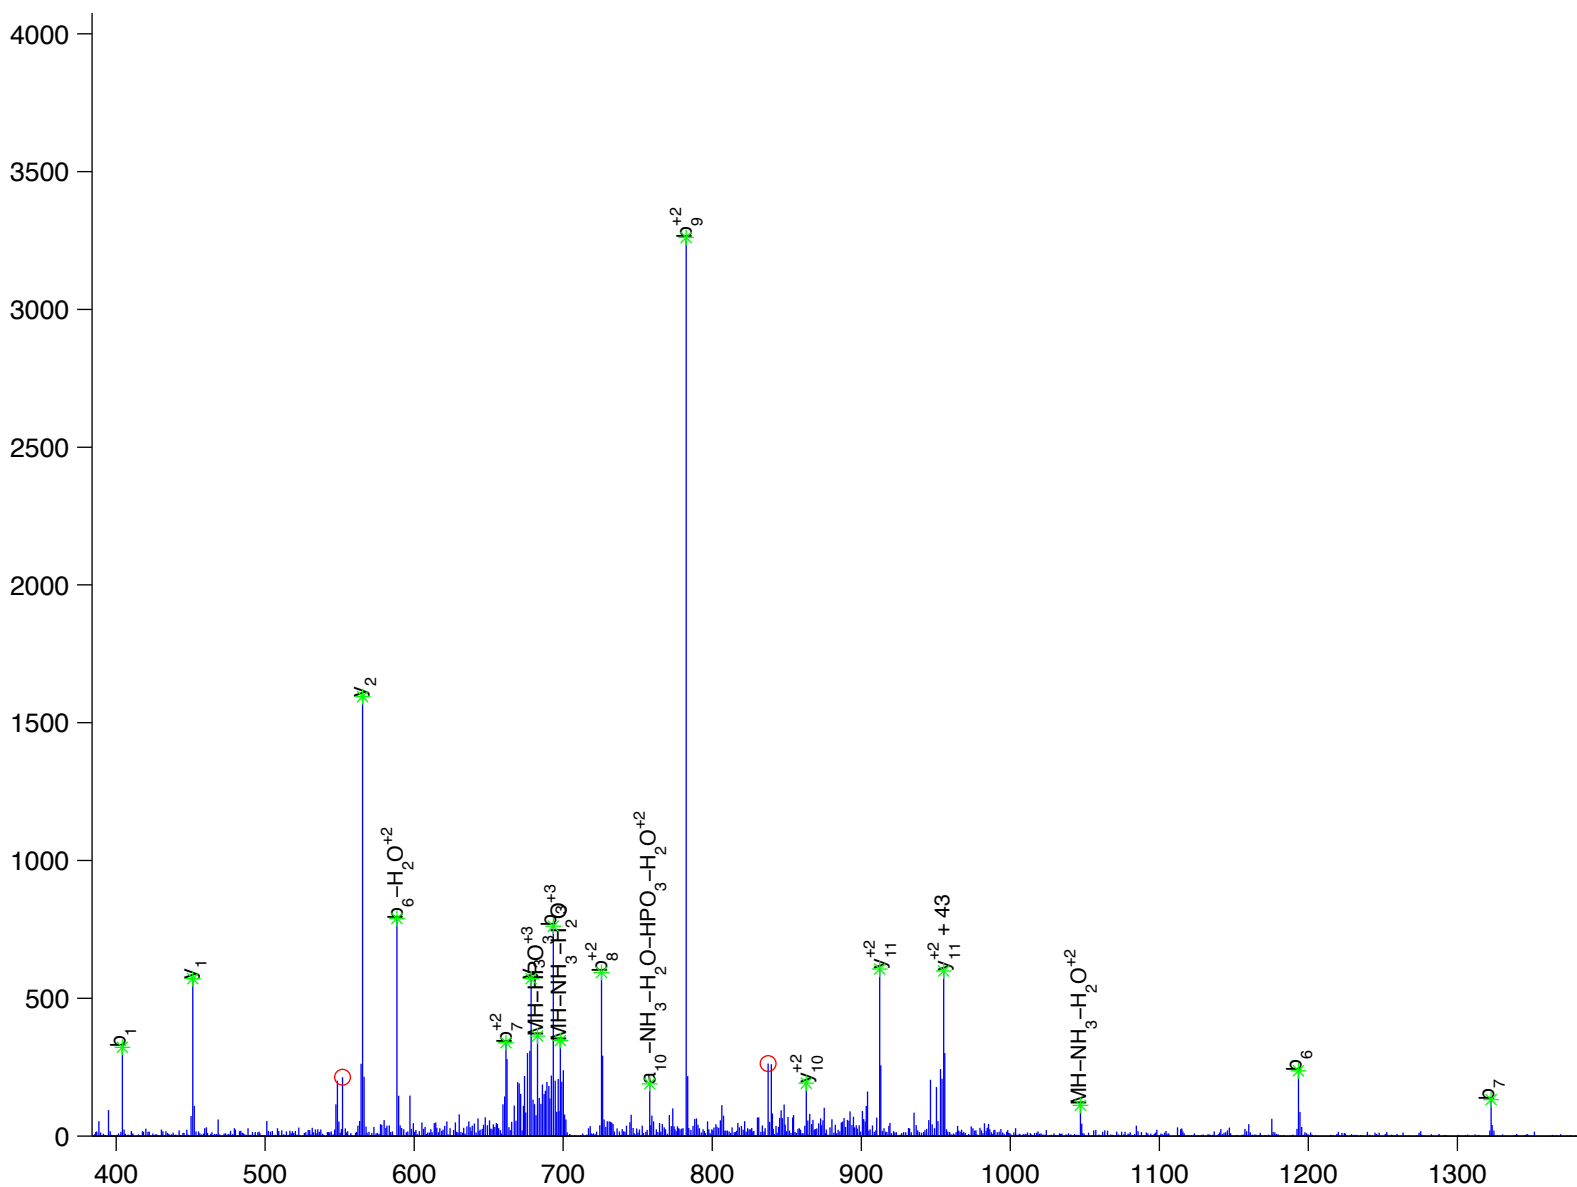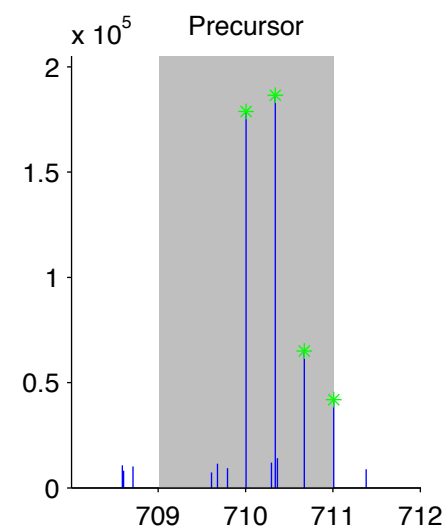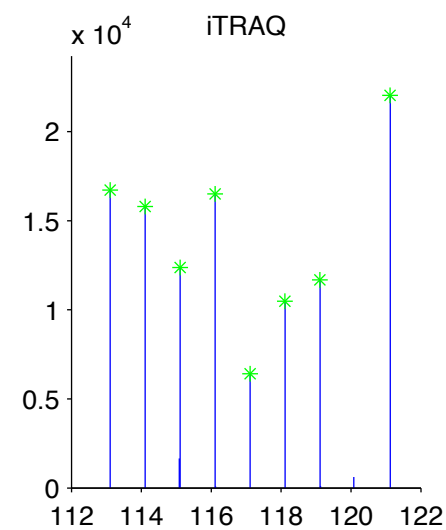

M [ D ] y [ V ] E [ I ] N [ I ] D [ H ] K

high density lipoprotein binding protein

Charge State: +3

Scan Number: 5865

File Name: 090806ptp1blivers\_M\_NC2.raw

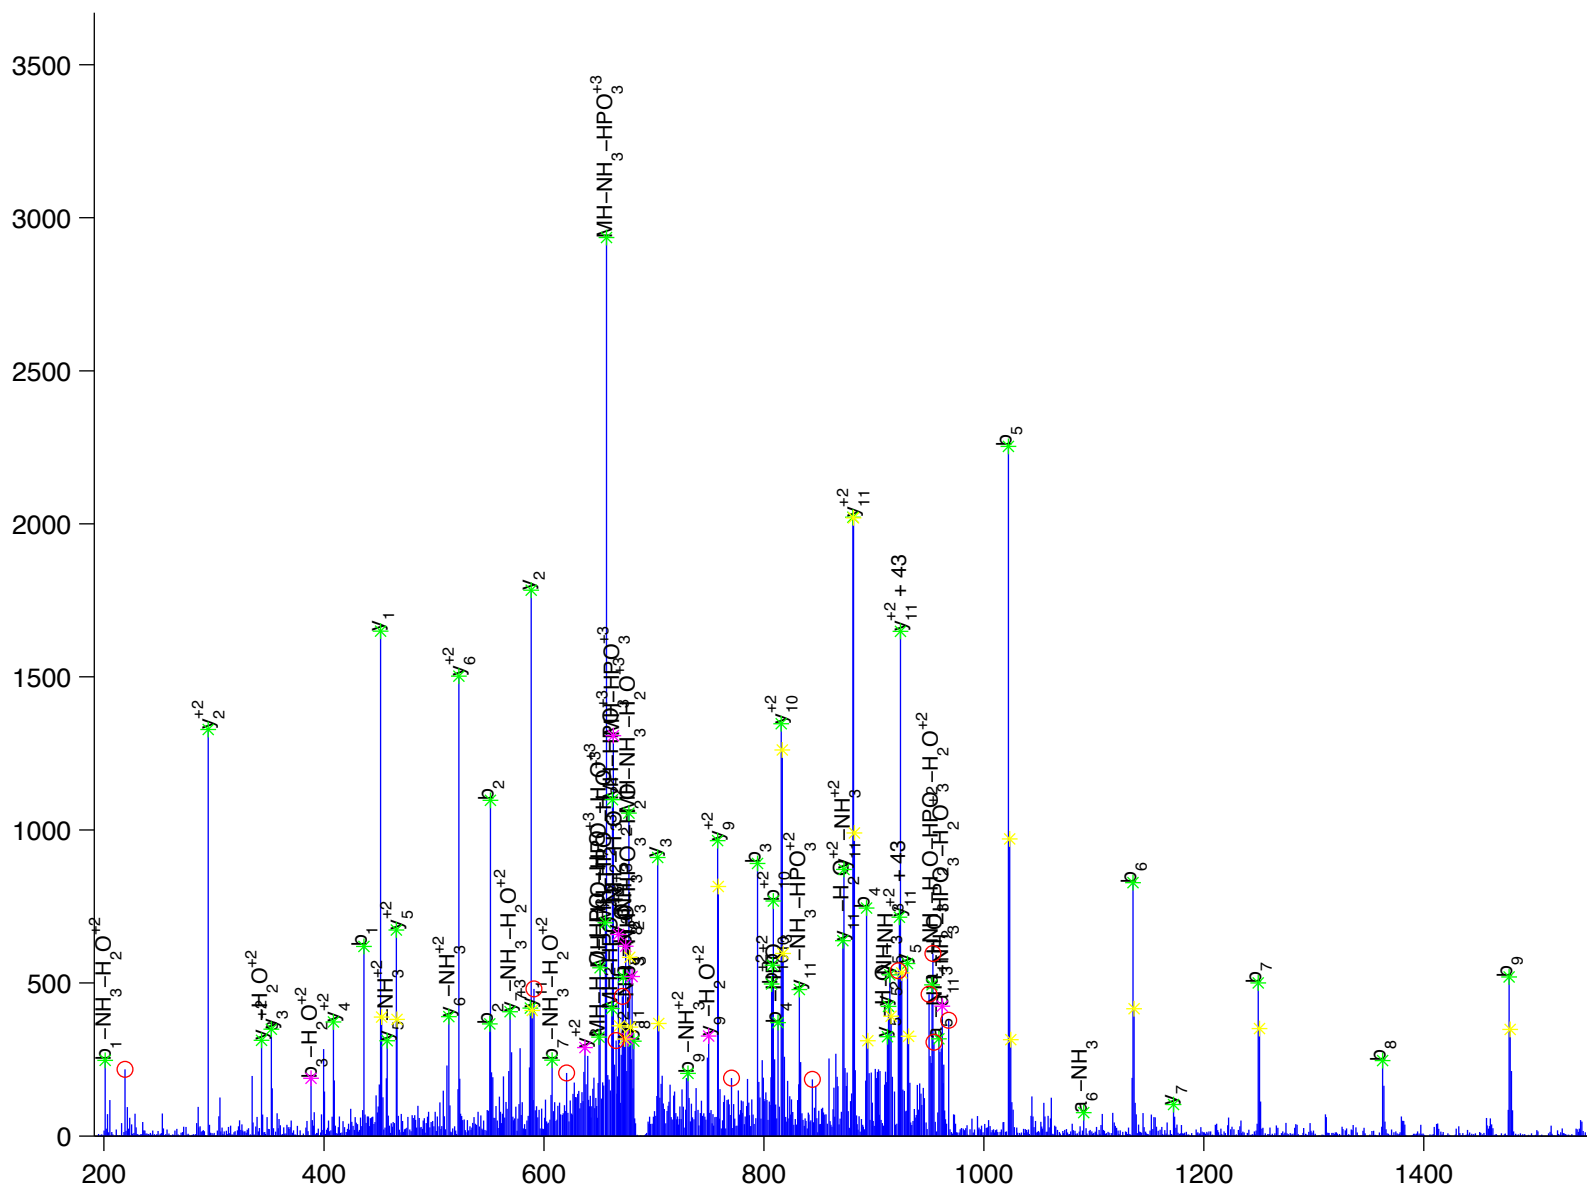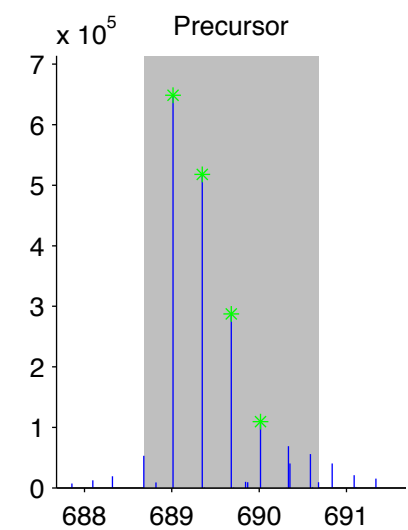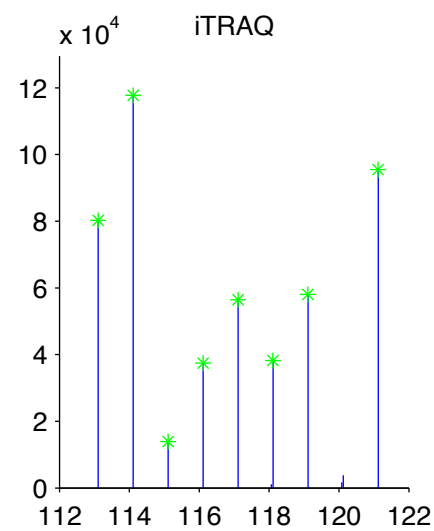

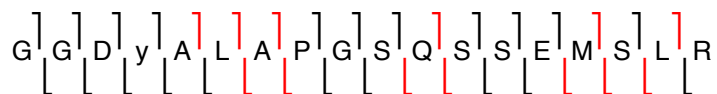

histocompatibility 2, D region locus 1

Charge State: +3

Scan Number: 5020

File Name: 090806ptp1blivers\_M\_NC2.raw

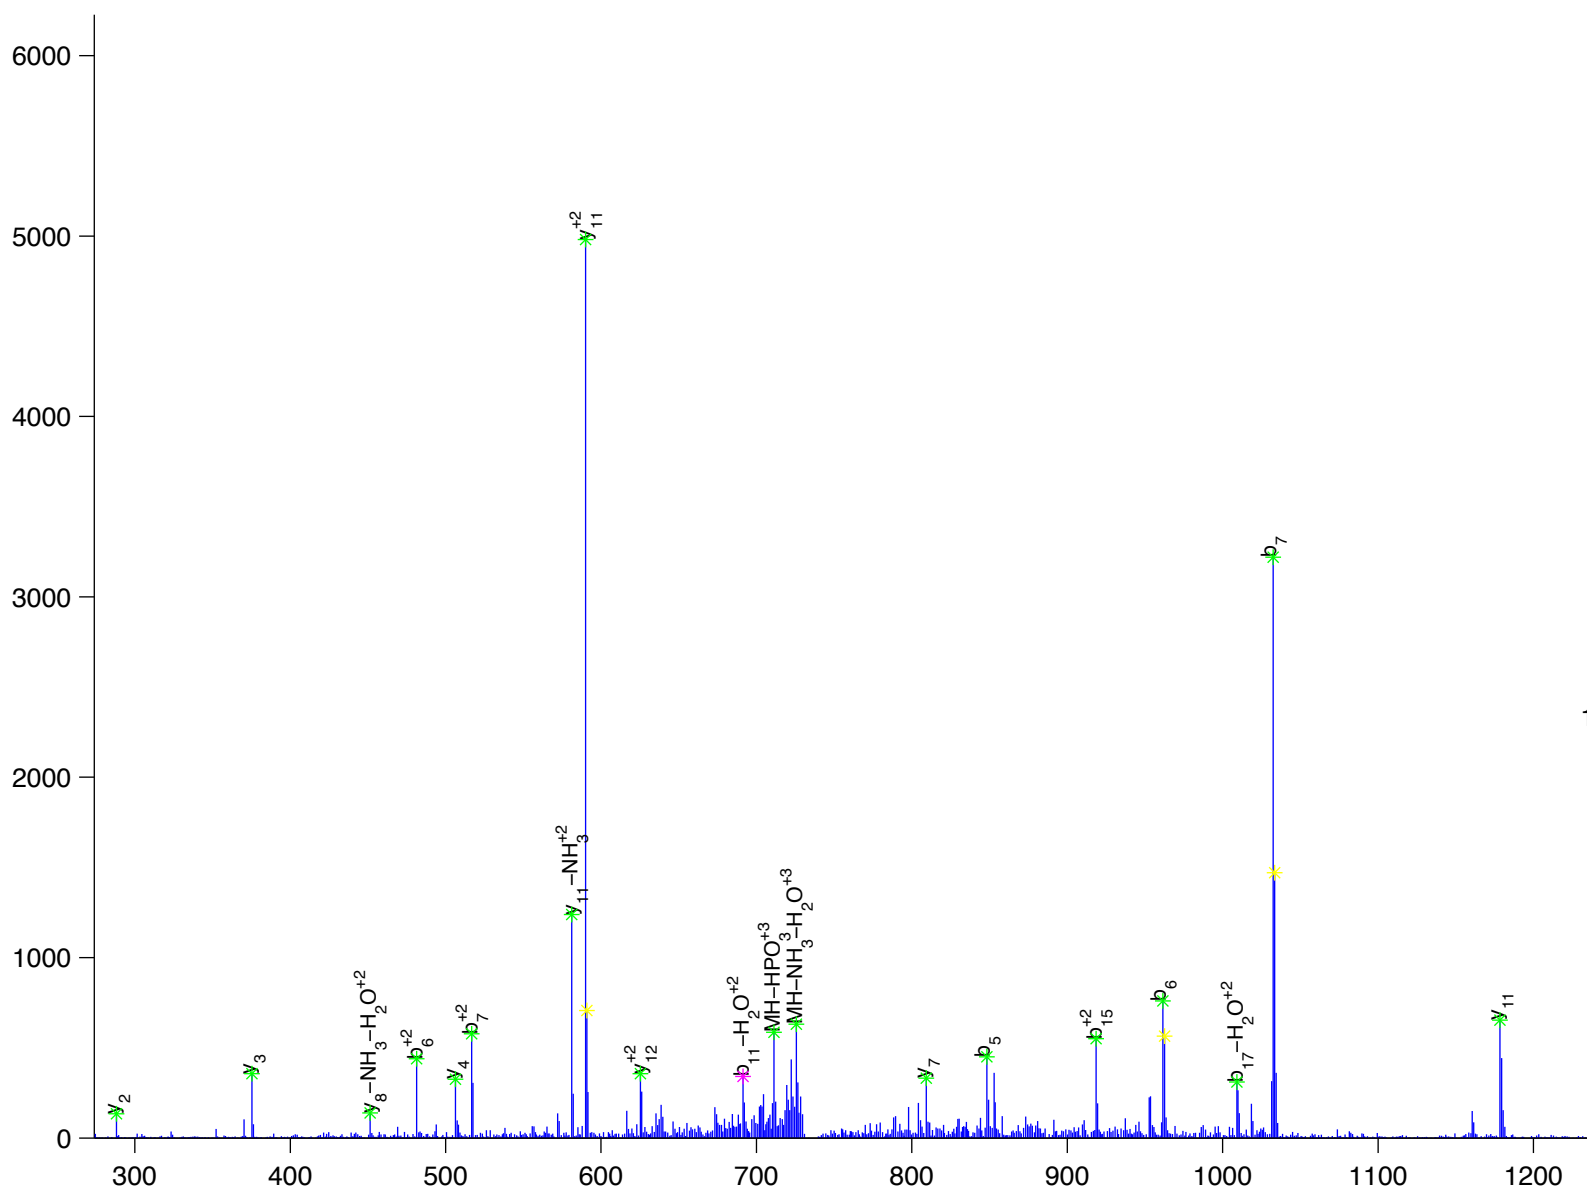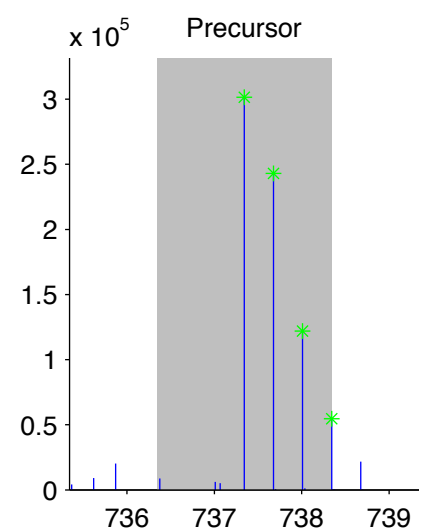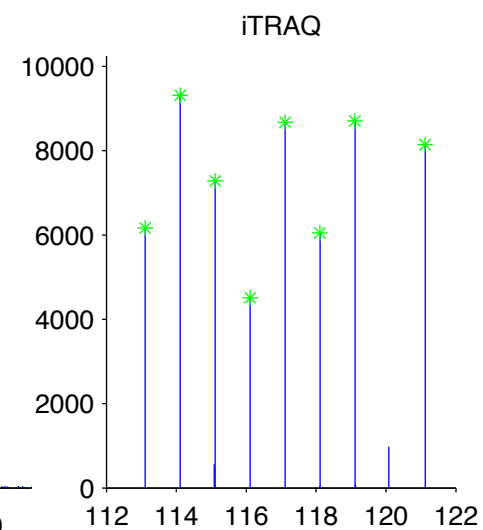

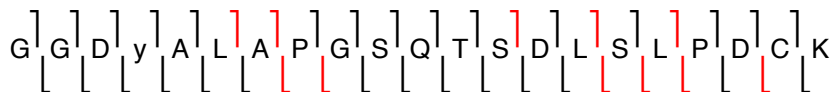

histocompatibility 2, K1, K region isoform 1  
Charge State: +3  
Scan Number: 1453  
File Name: HJ072909\_HFD\_E1\_2.raw

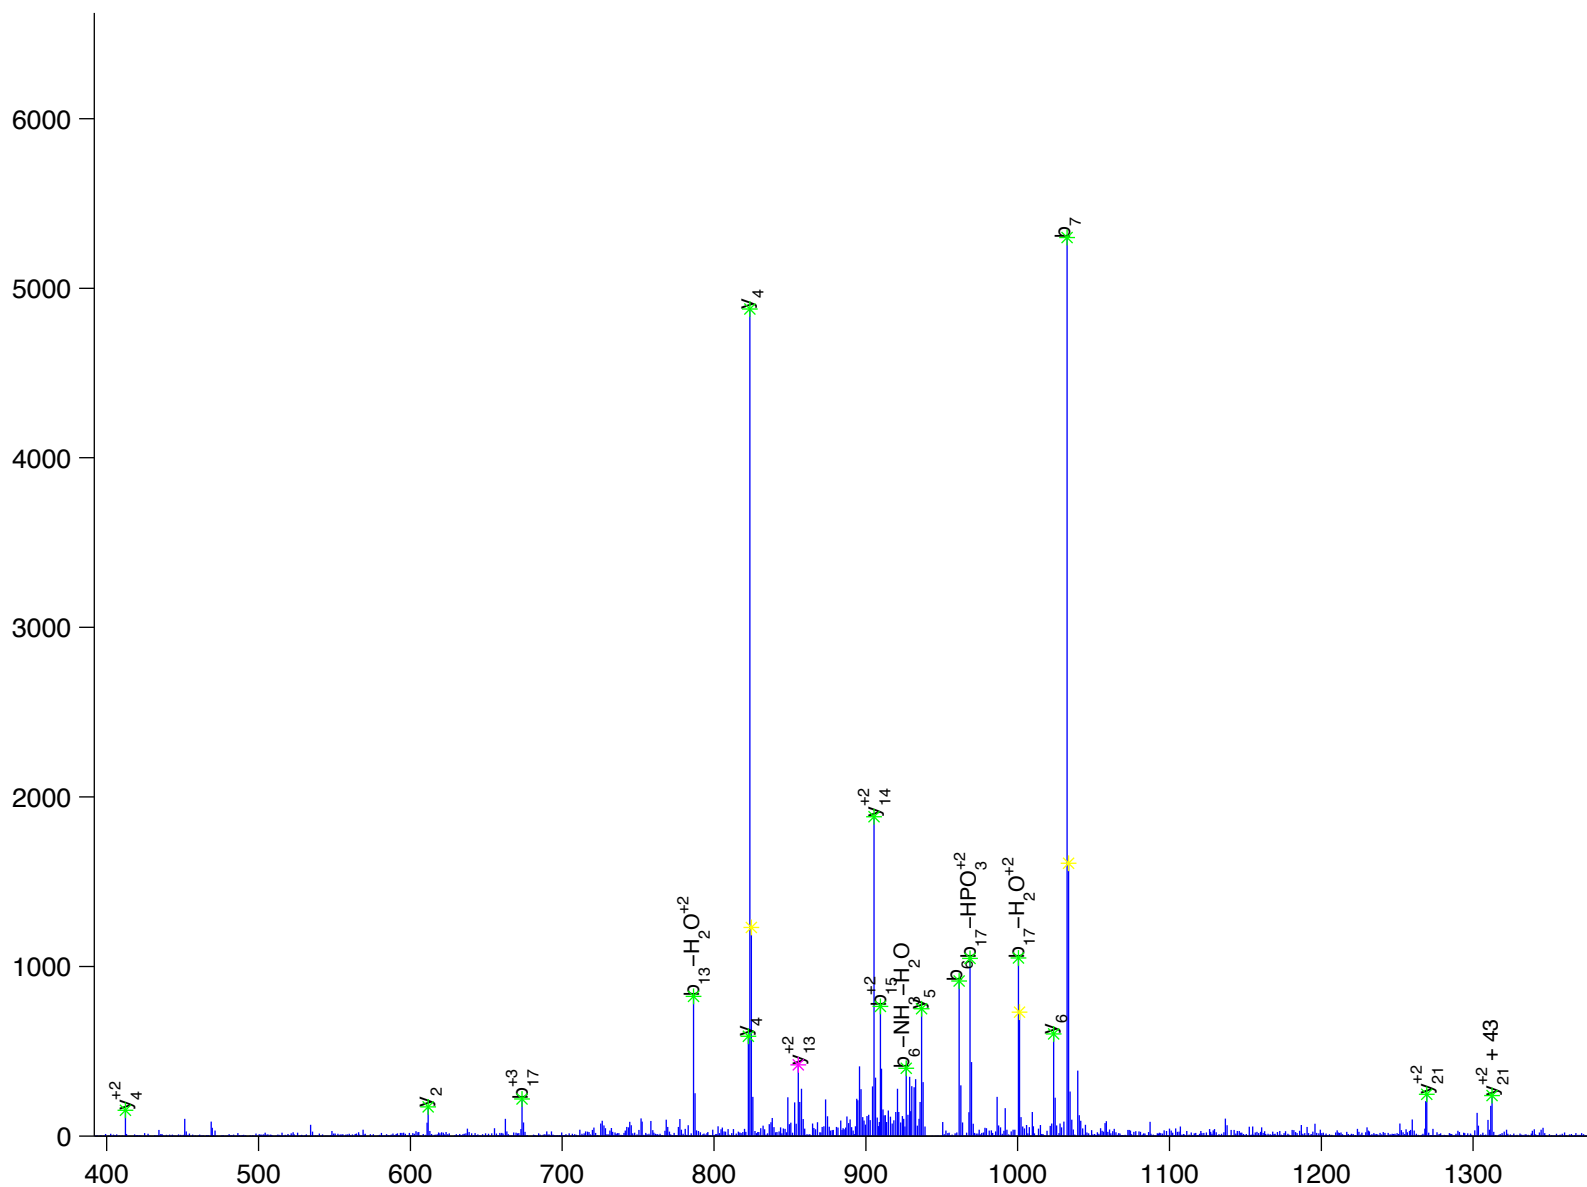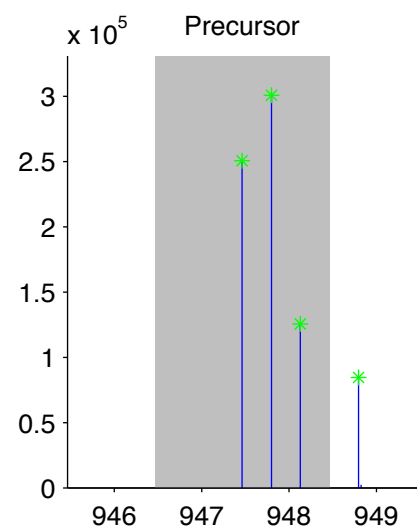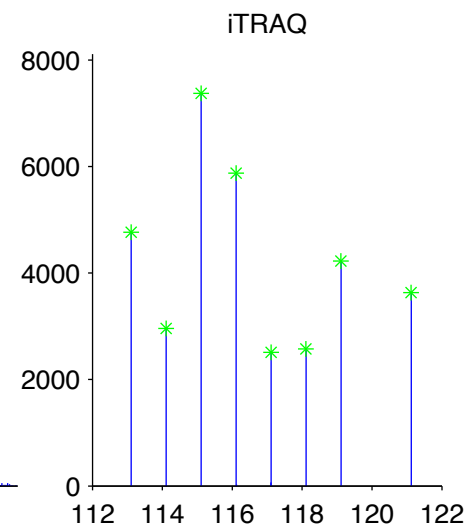



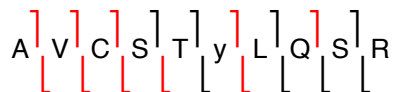

homeodomain interacting protein kinase 1  
 Charge State: +2  
 Scan Number: 3744  
 File Name: HJ072909\_HFD\_E1.raw

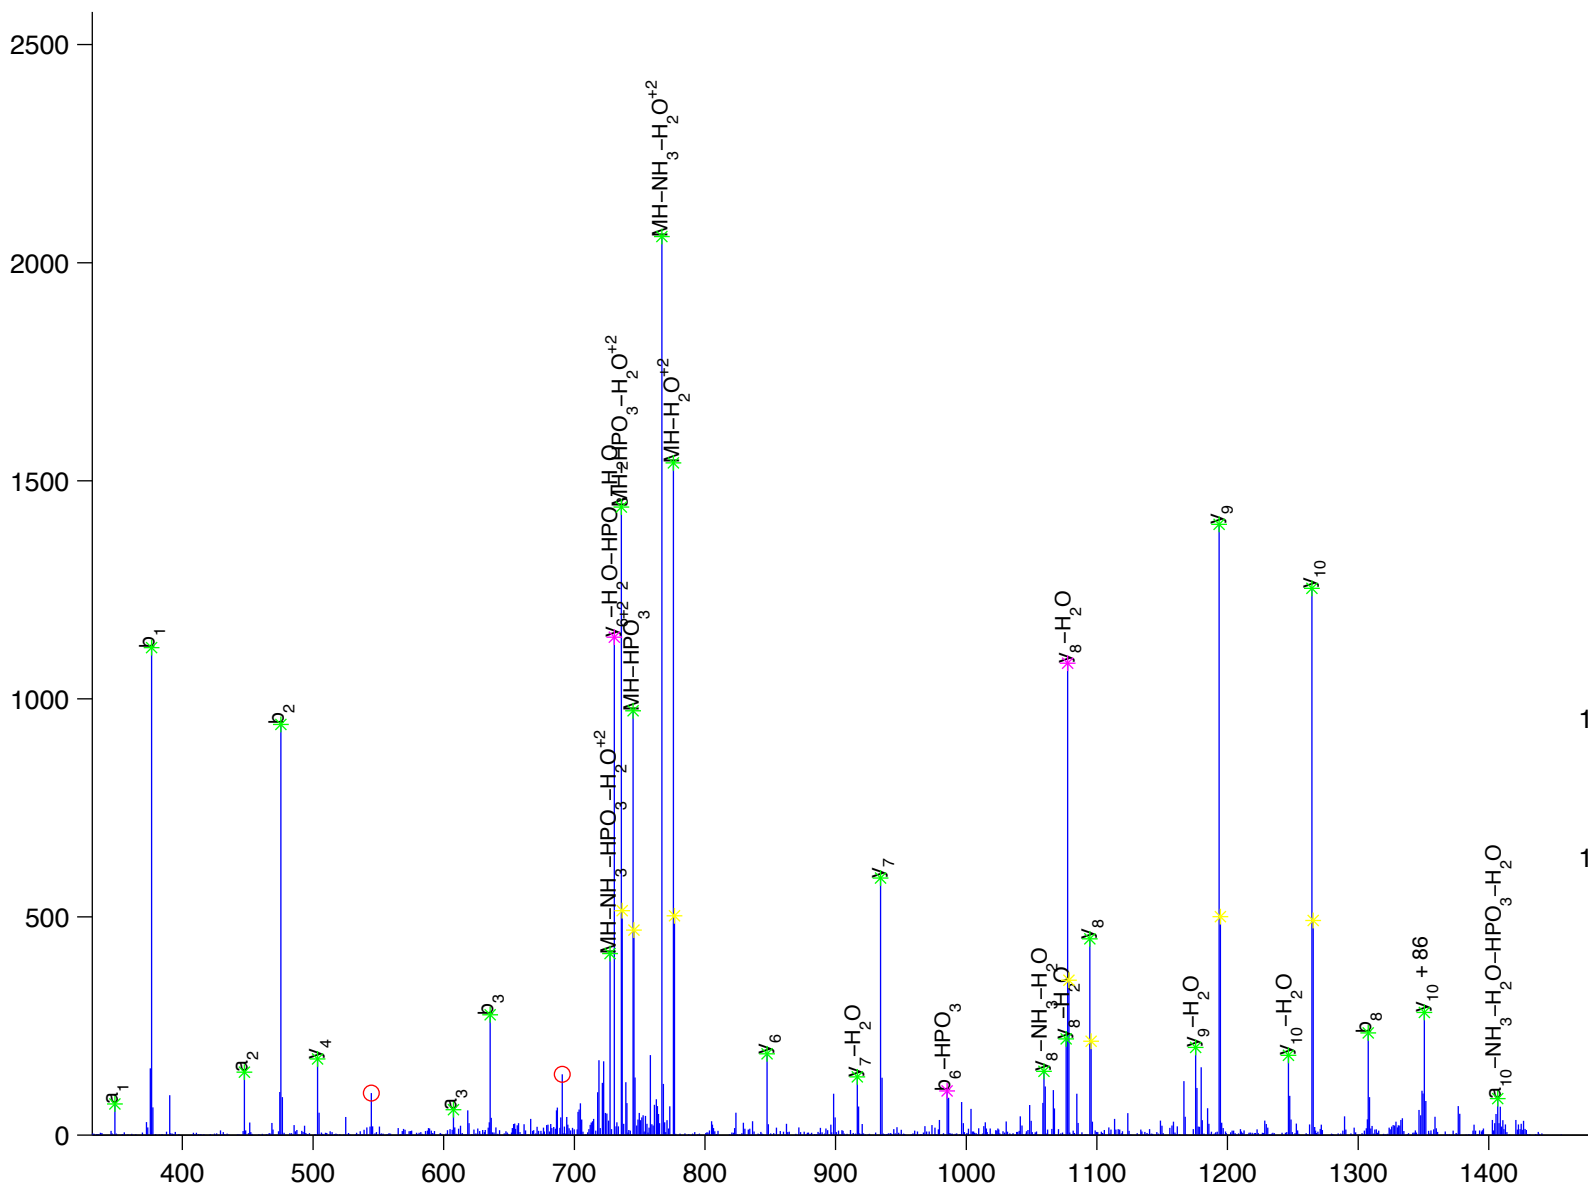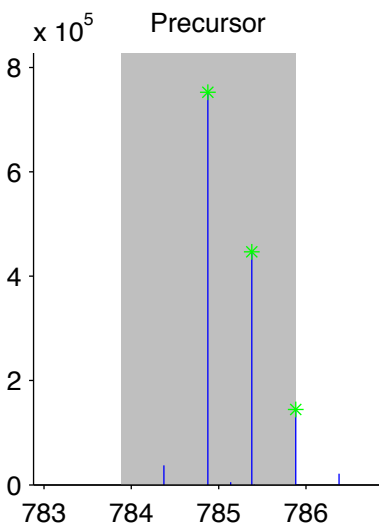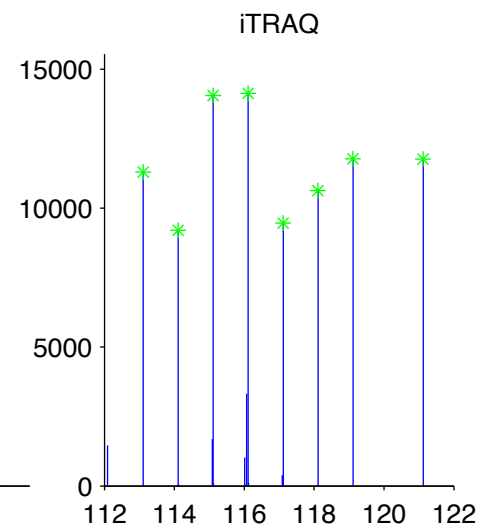

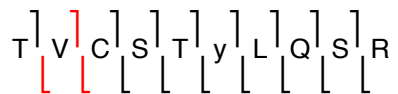

homeodomain interacting protein kinase 3

Charge State: +2

Scan Number: 4755

File Name: 090807ptp1blivers\_M\_HFD\_basal.raw

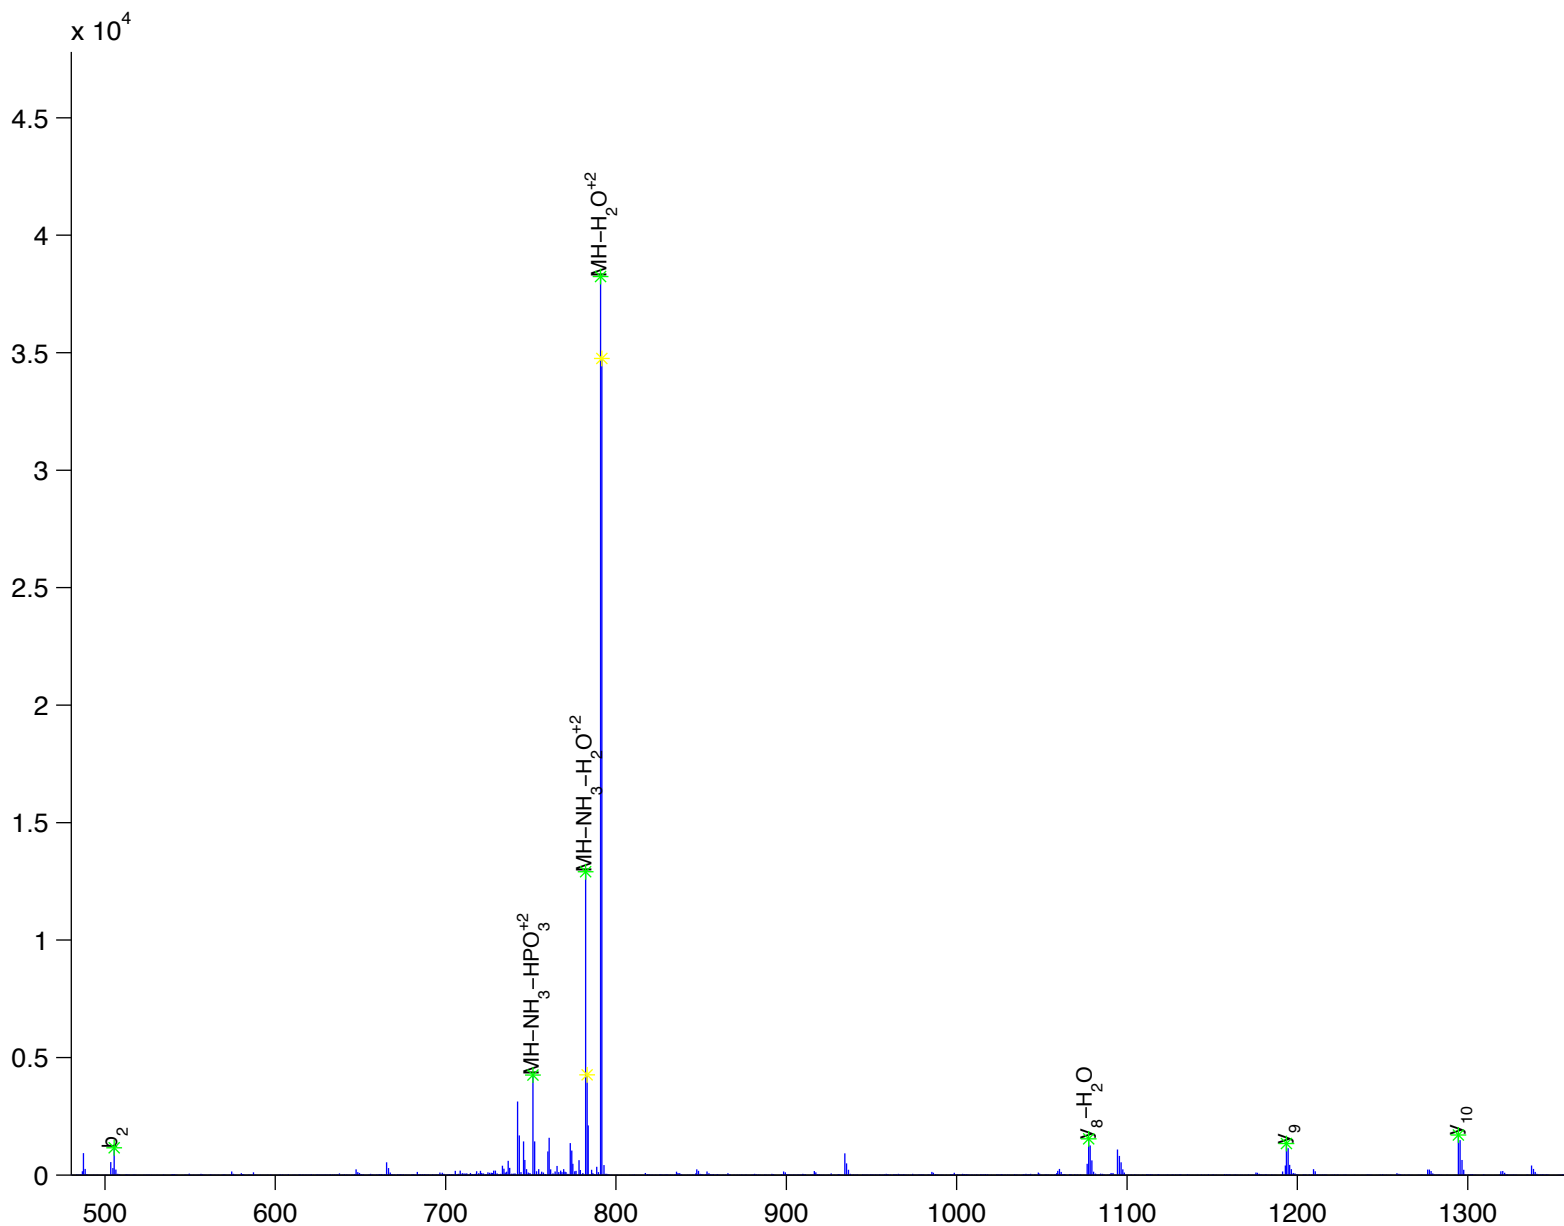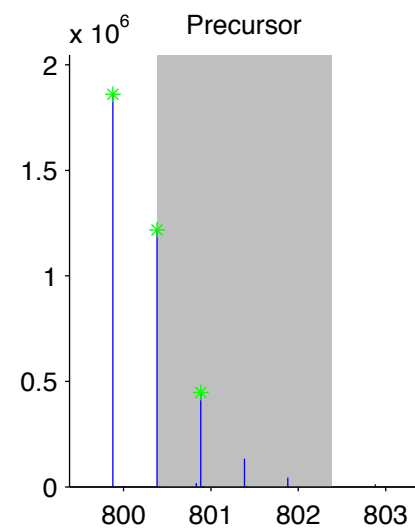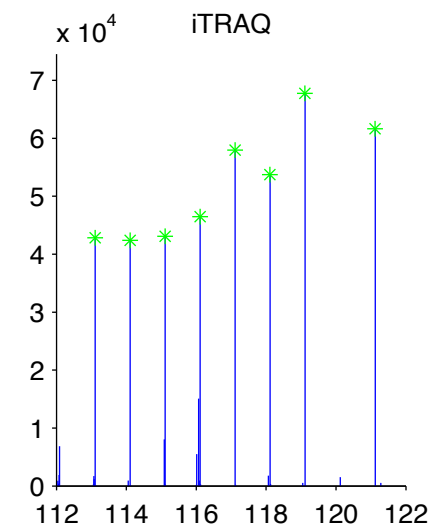

G[Q]N[N]P[Q]V[C]P[Y]N[L]y[A]E[Q]L[S]G[S]A[F]T[C]P[R]

homogentisate 1, 2-dioxygenase

Charge State: +3

Scan Number: 7018

File Name: 091130ptp1blivers\_hfd\_basal2.raw

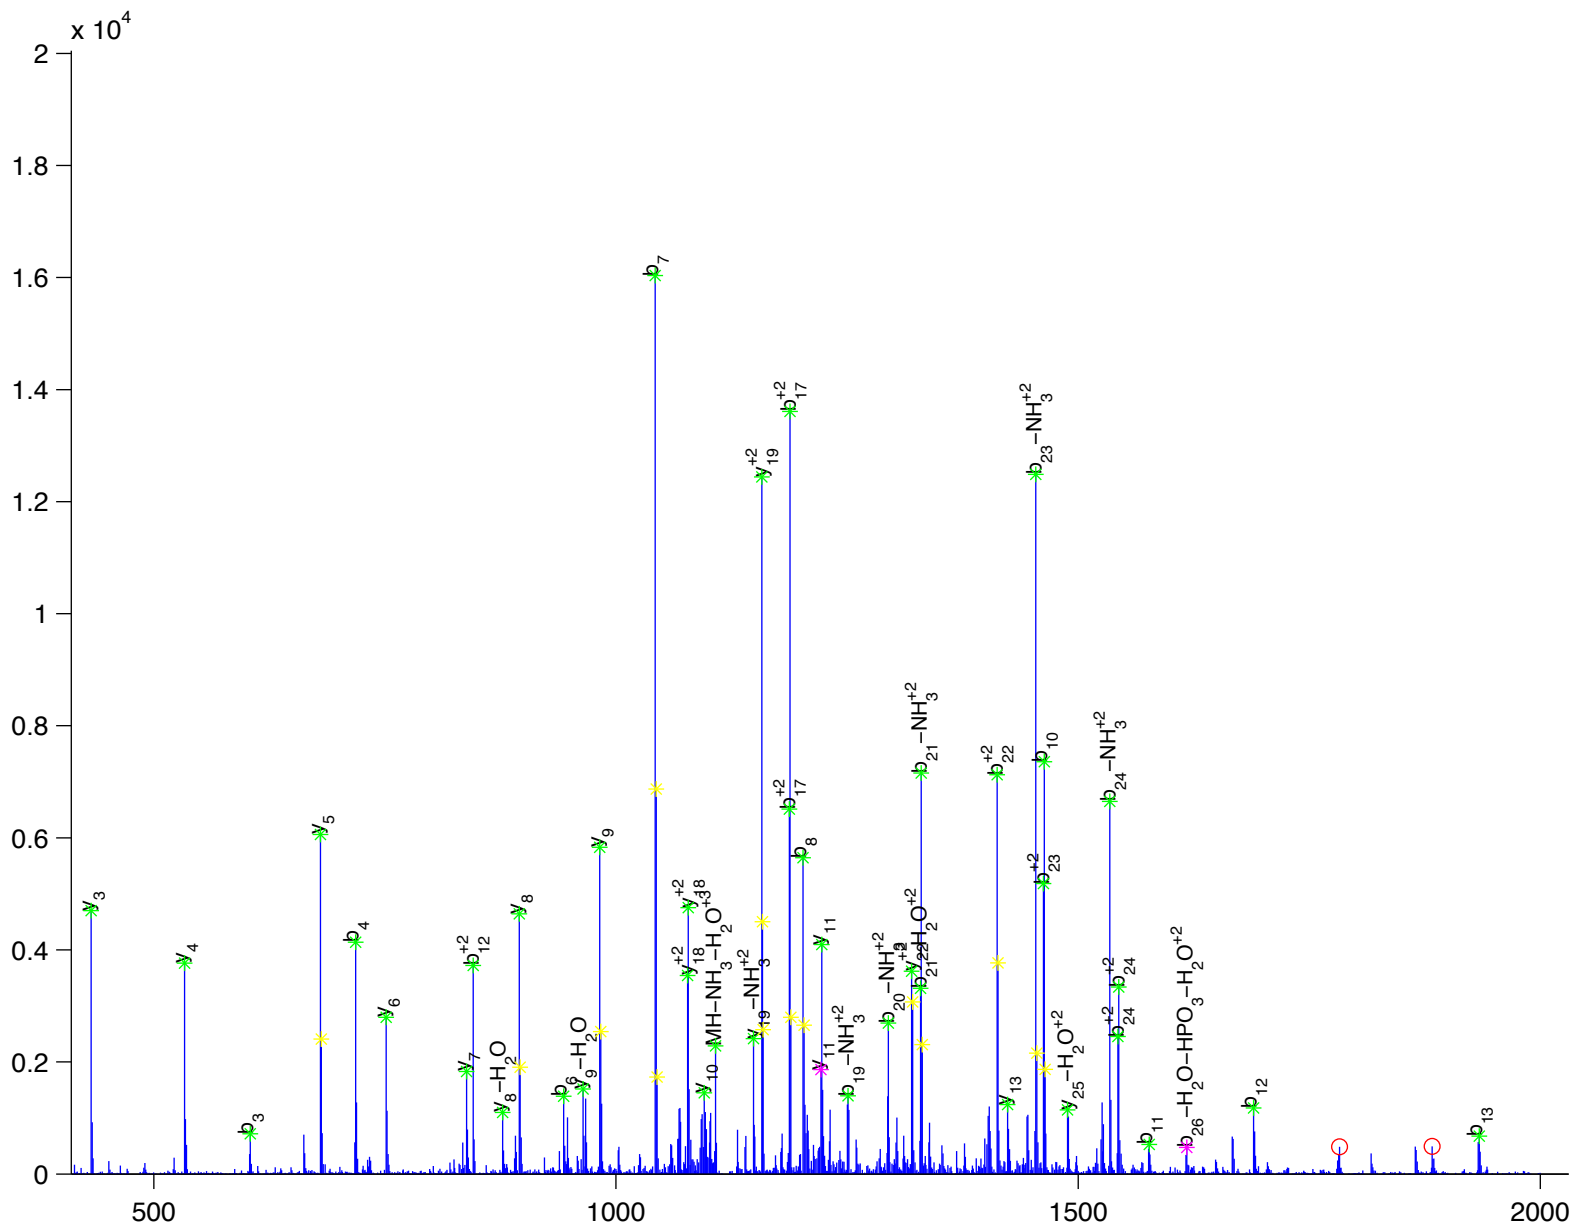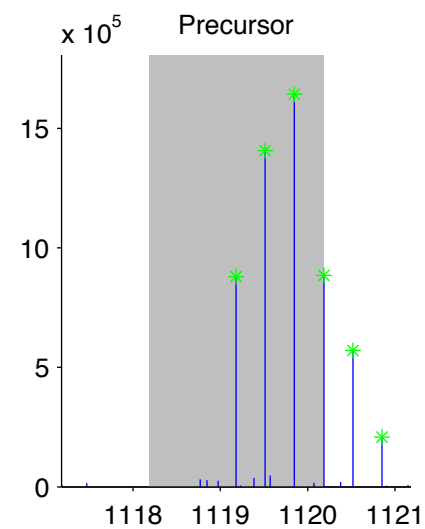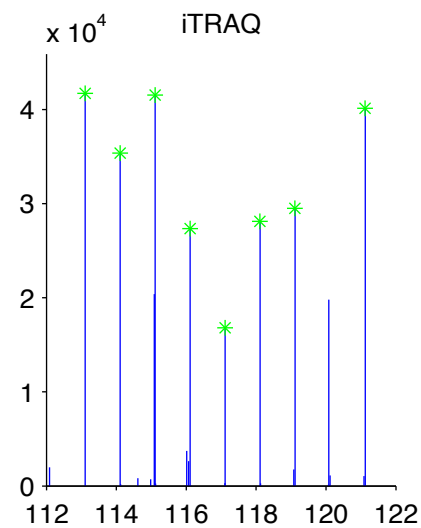

T [ E ] V [ P ] y [ E ] E [ L ] W [ L ] E [ E ] G [ K ] P [ S ] R

hypothetical protein LOC381126

Charge State: +3

Scan Number: 7028

File Name: 090806ptp1blivers\_M\_NC2.raw

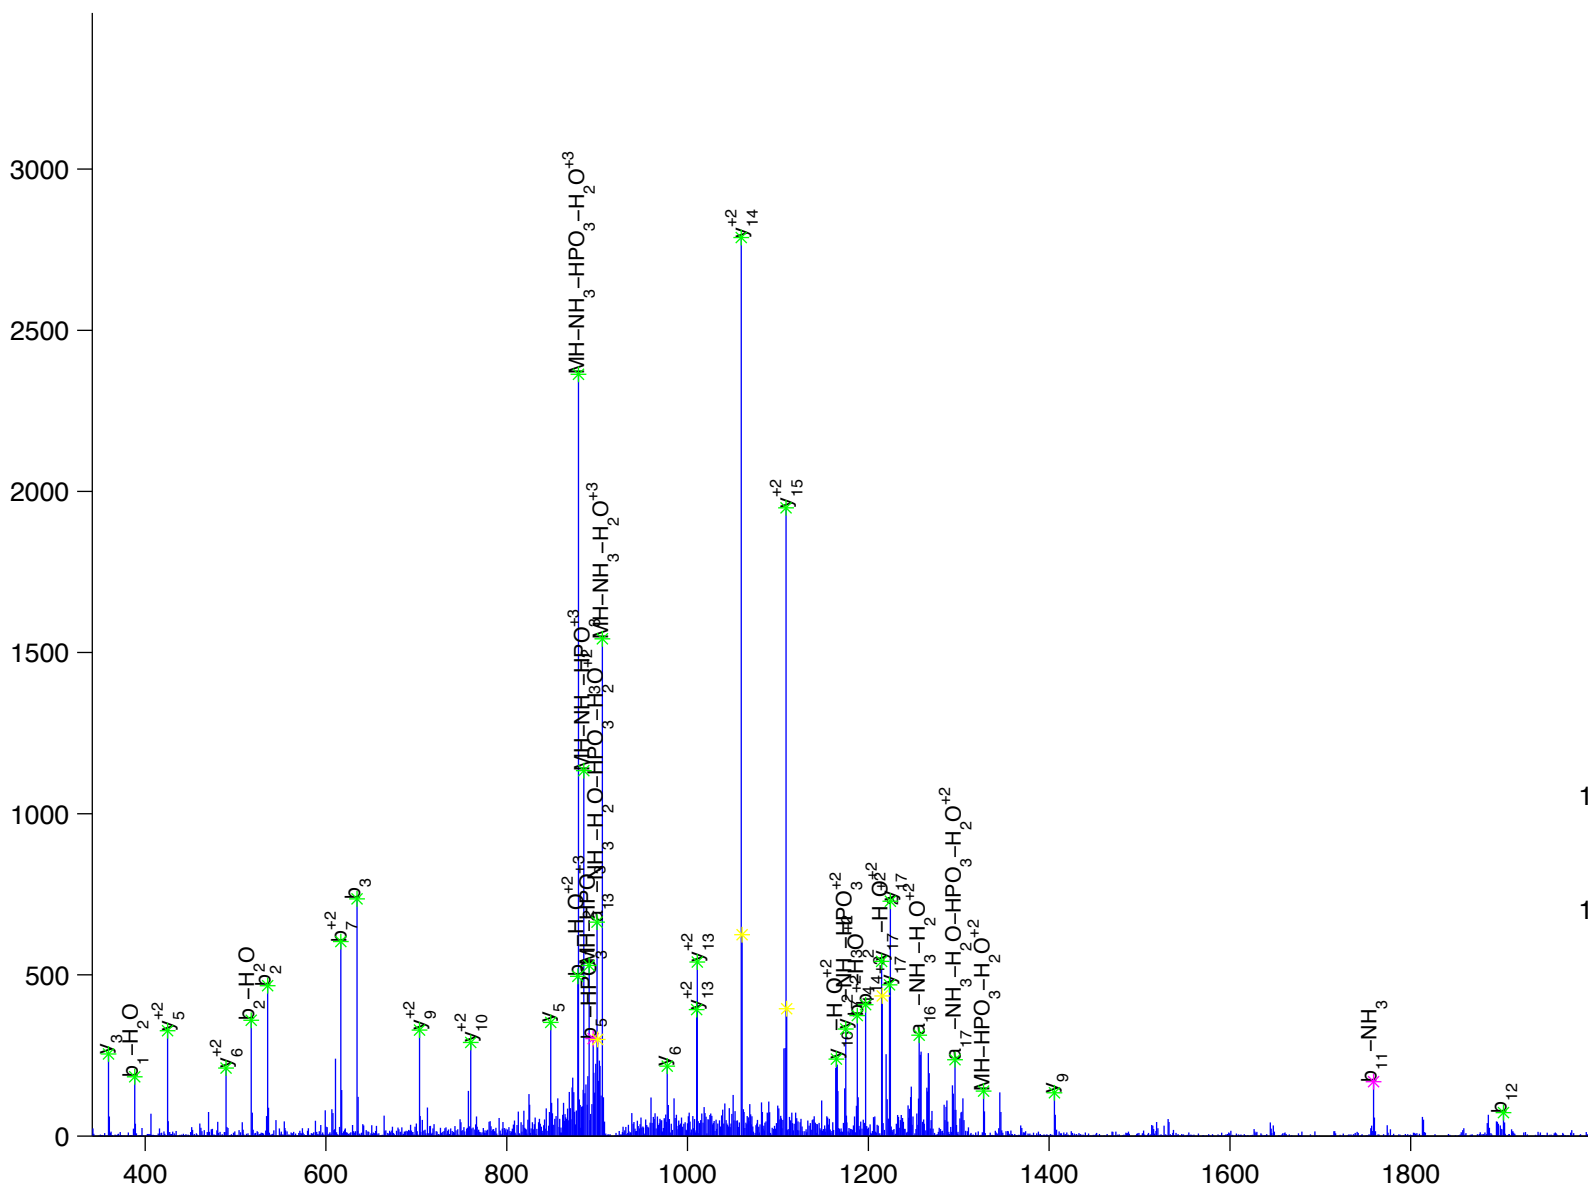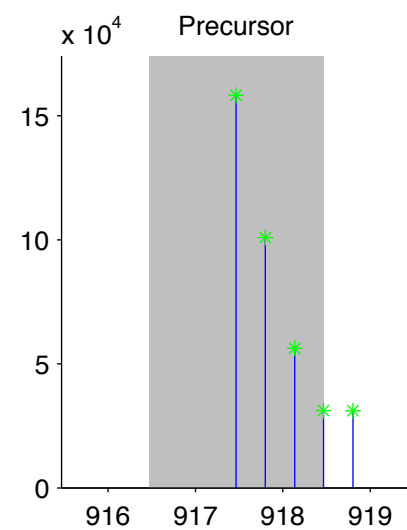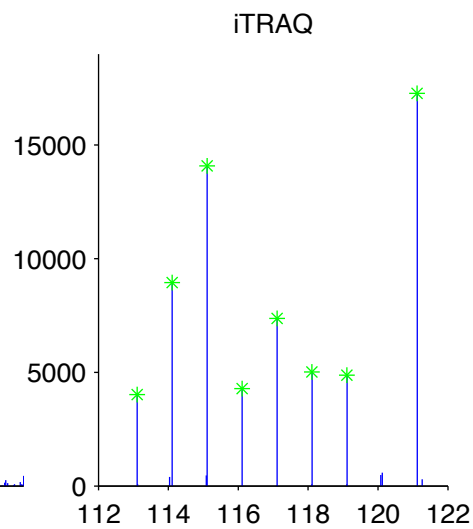

T[S]N[S]T[S]E[E]S[D]L[H]y[A]D[I]H[V]L[R]

hypothetical protein LOC66952

Charge State: +4

Scan Number: 5956

File Name: 100908ptp1blivers\_ncHFD3\_basal.raw

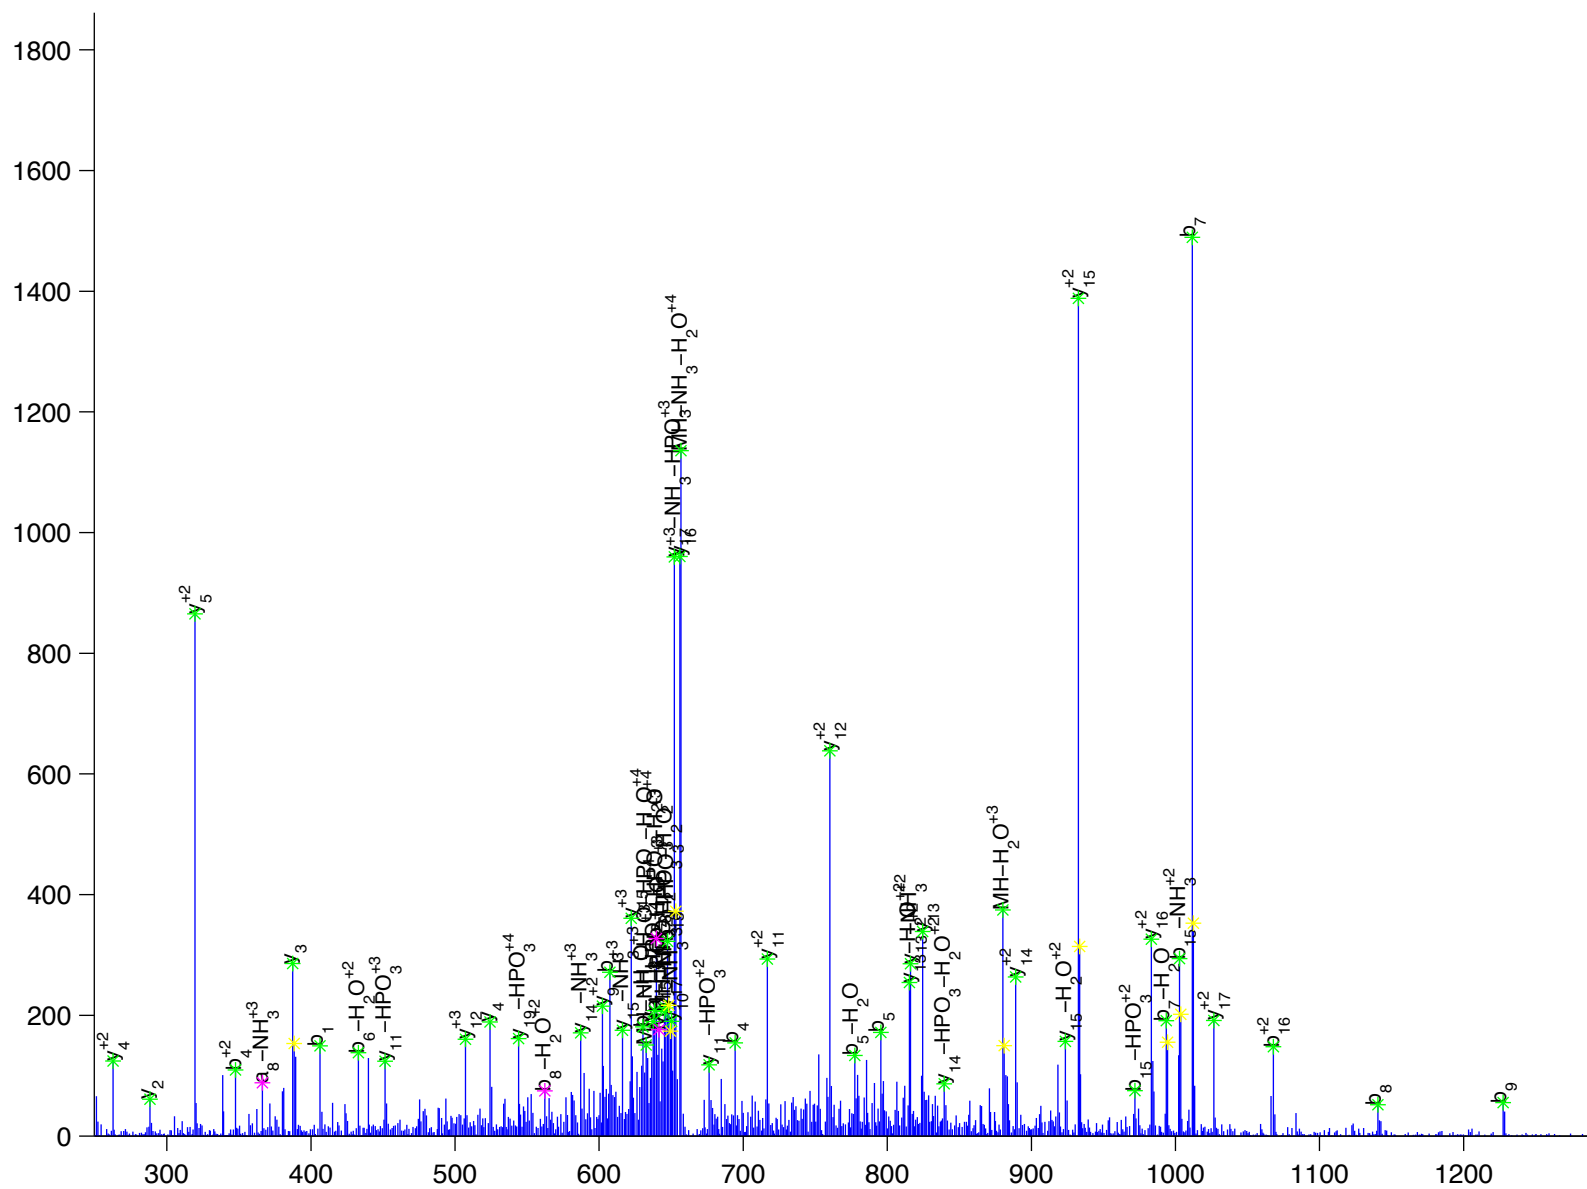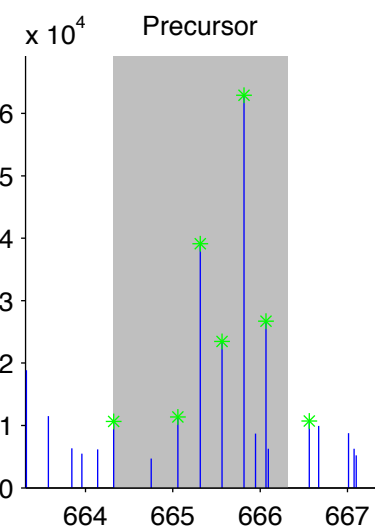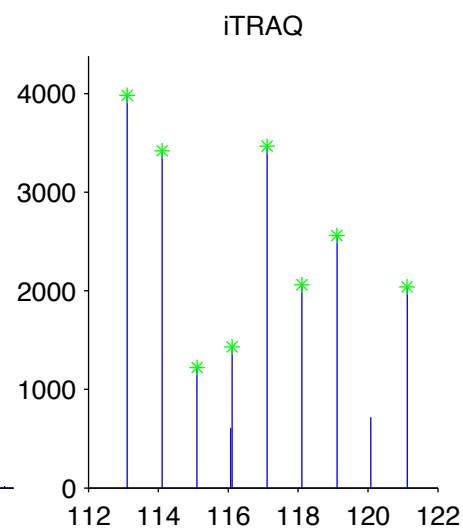

I [G] I [V] G [G] C [Q] E [y] T [G] A [P] Y [F] A [G] I [S] A [L] K

hypothetical protein LOC69225

Charge State: +4

Scan Number: 8507

File Name: 091130ptp1blivers\_hfd\_basal2.raw

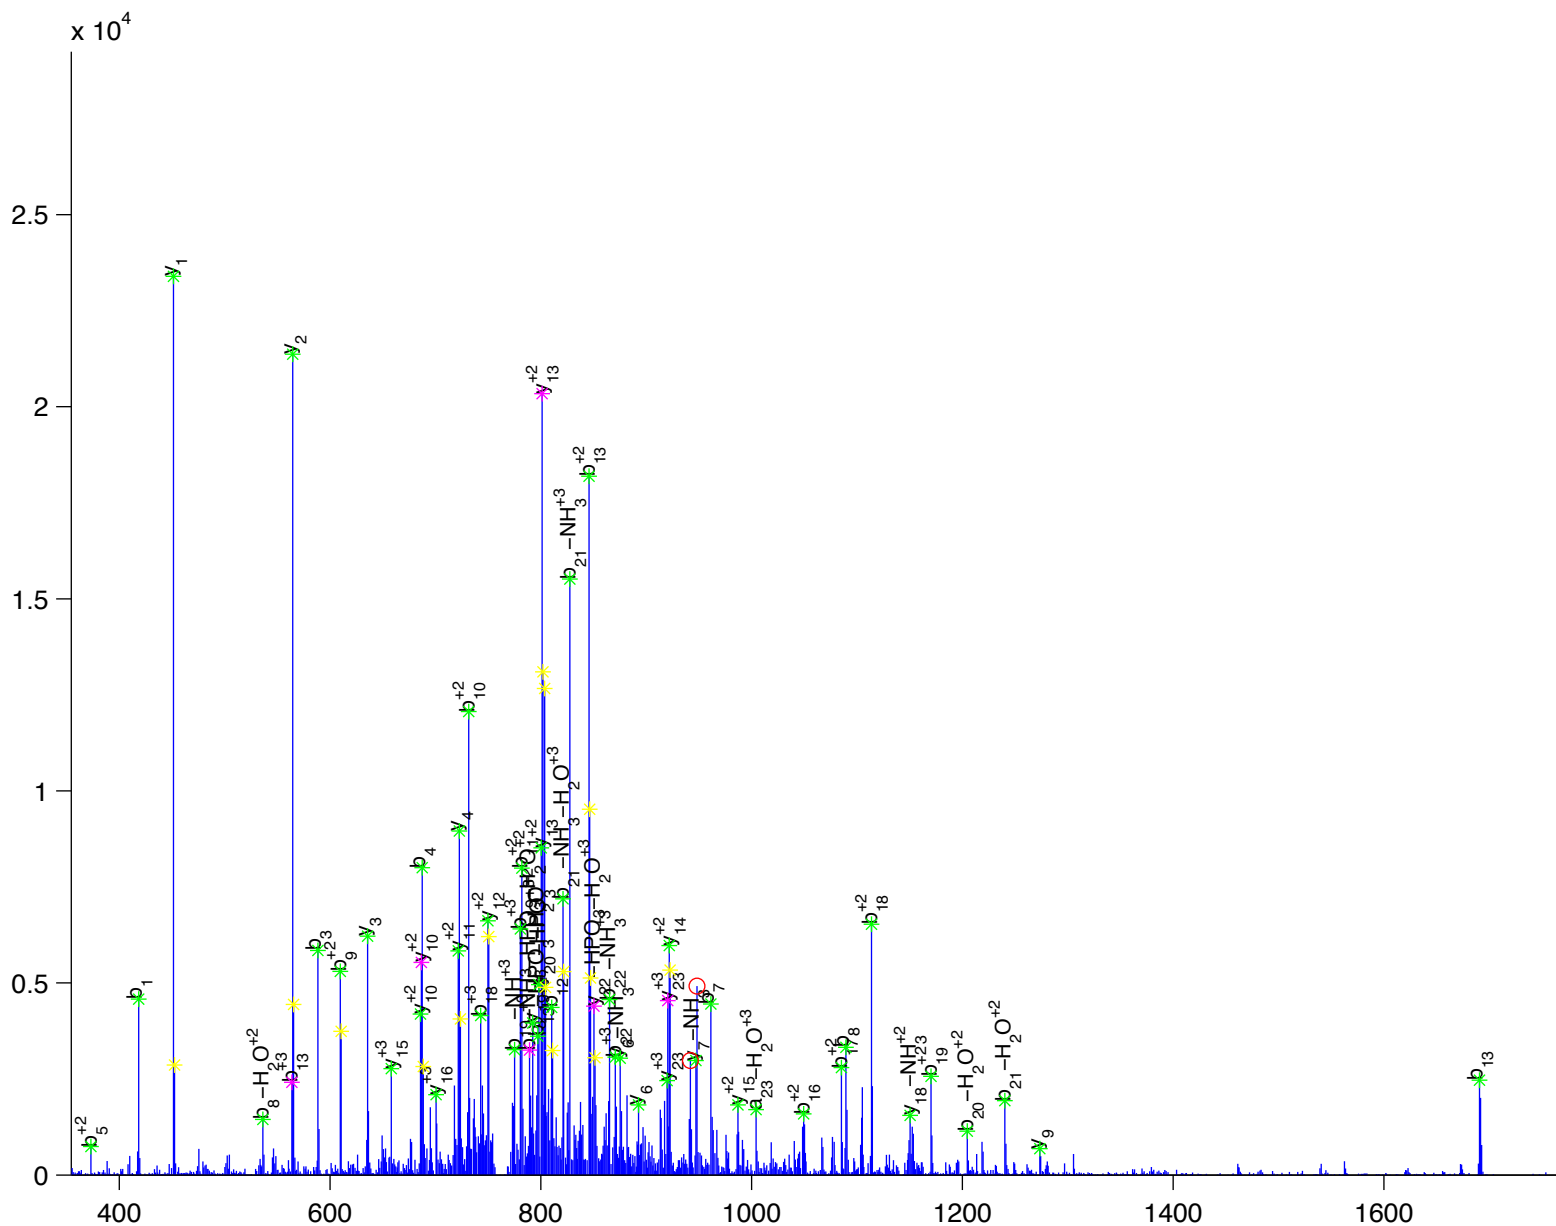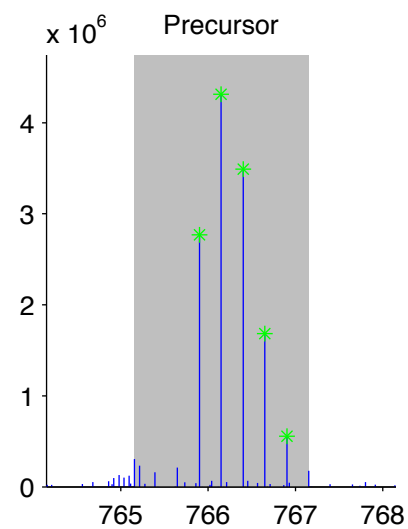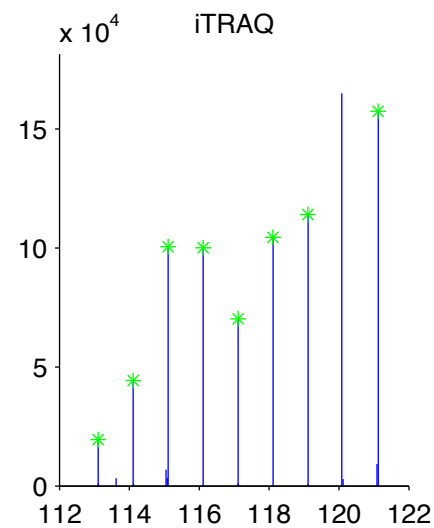

Y [ y ] K [ E ] T [ S ] G [ L ] M [ L ] D [ V ] G [ G ] Y [ M ] K

hypothetical protein LOC76429

Charge State: +4

Scan Number: 8132

File Name: 090806ptp1blivers\_M\_NC2.raw

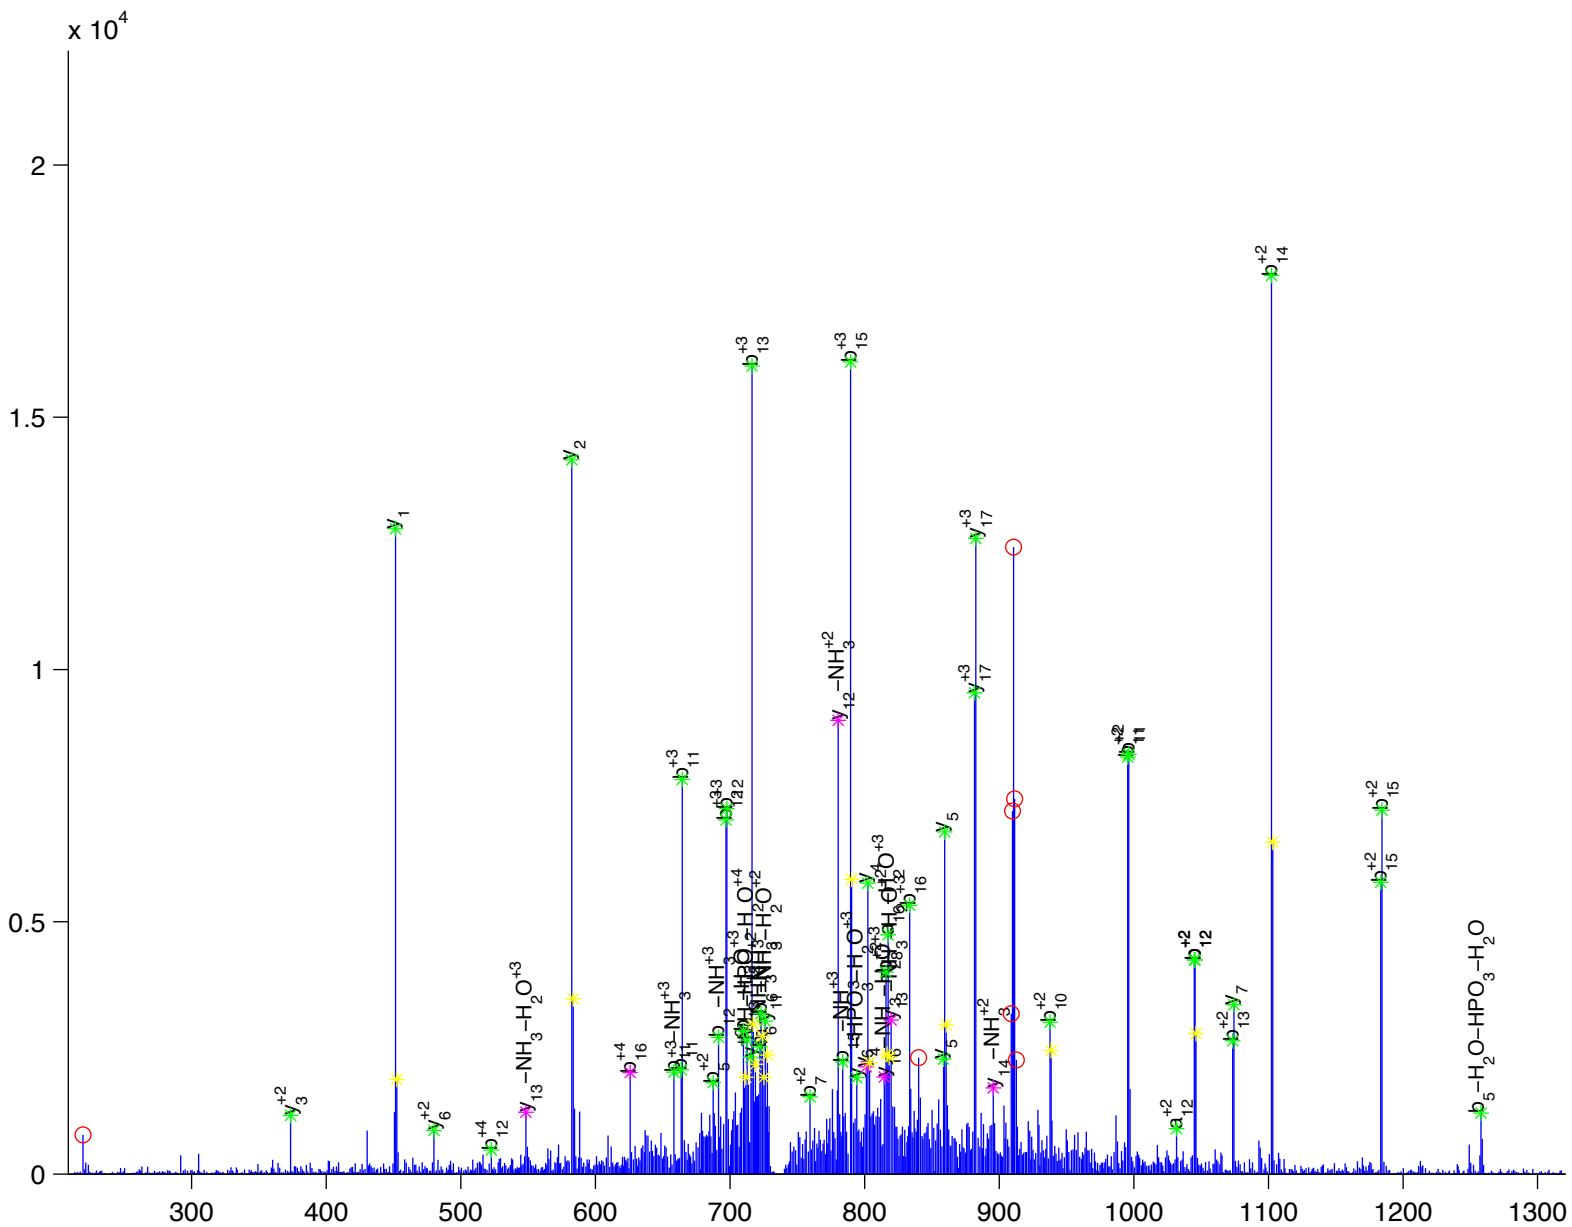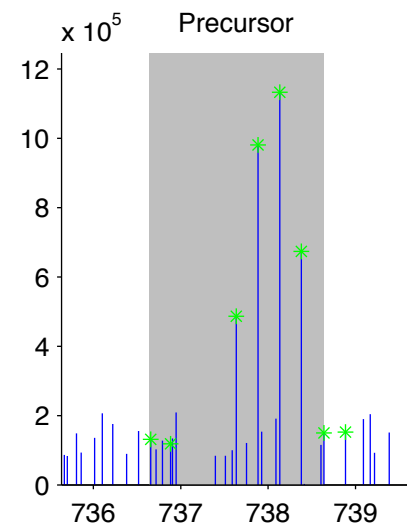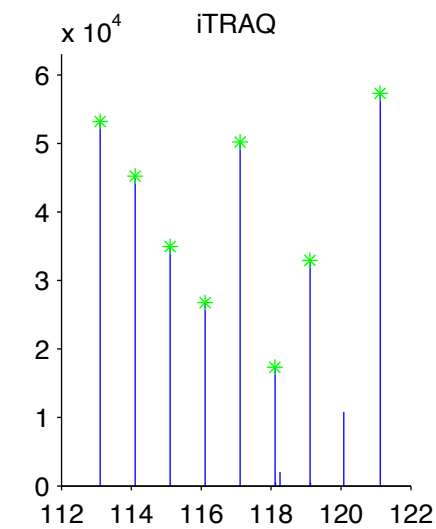

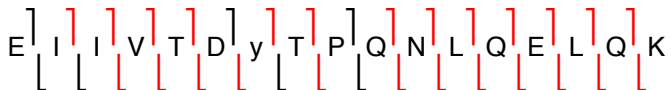

indolethylamine N-methyltransferase

Charge State: +3

Scan Number: 7064

File Name: 091130ptp1blivers\_hfd\_basal2.raw

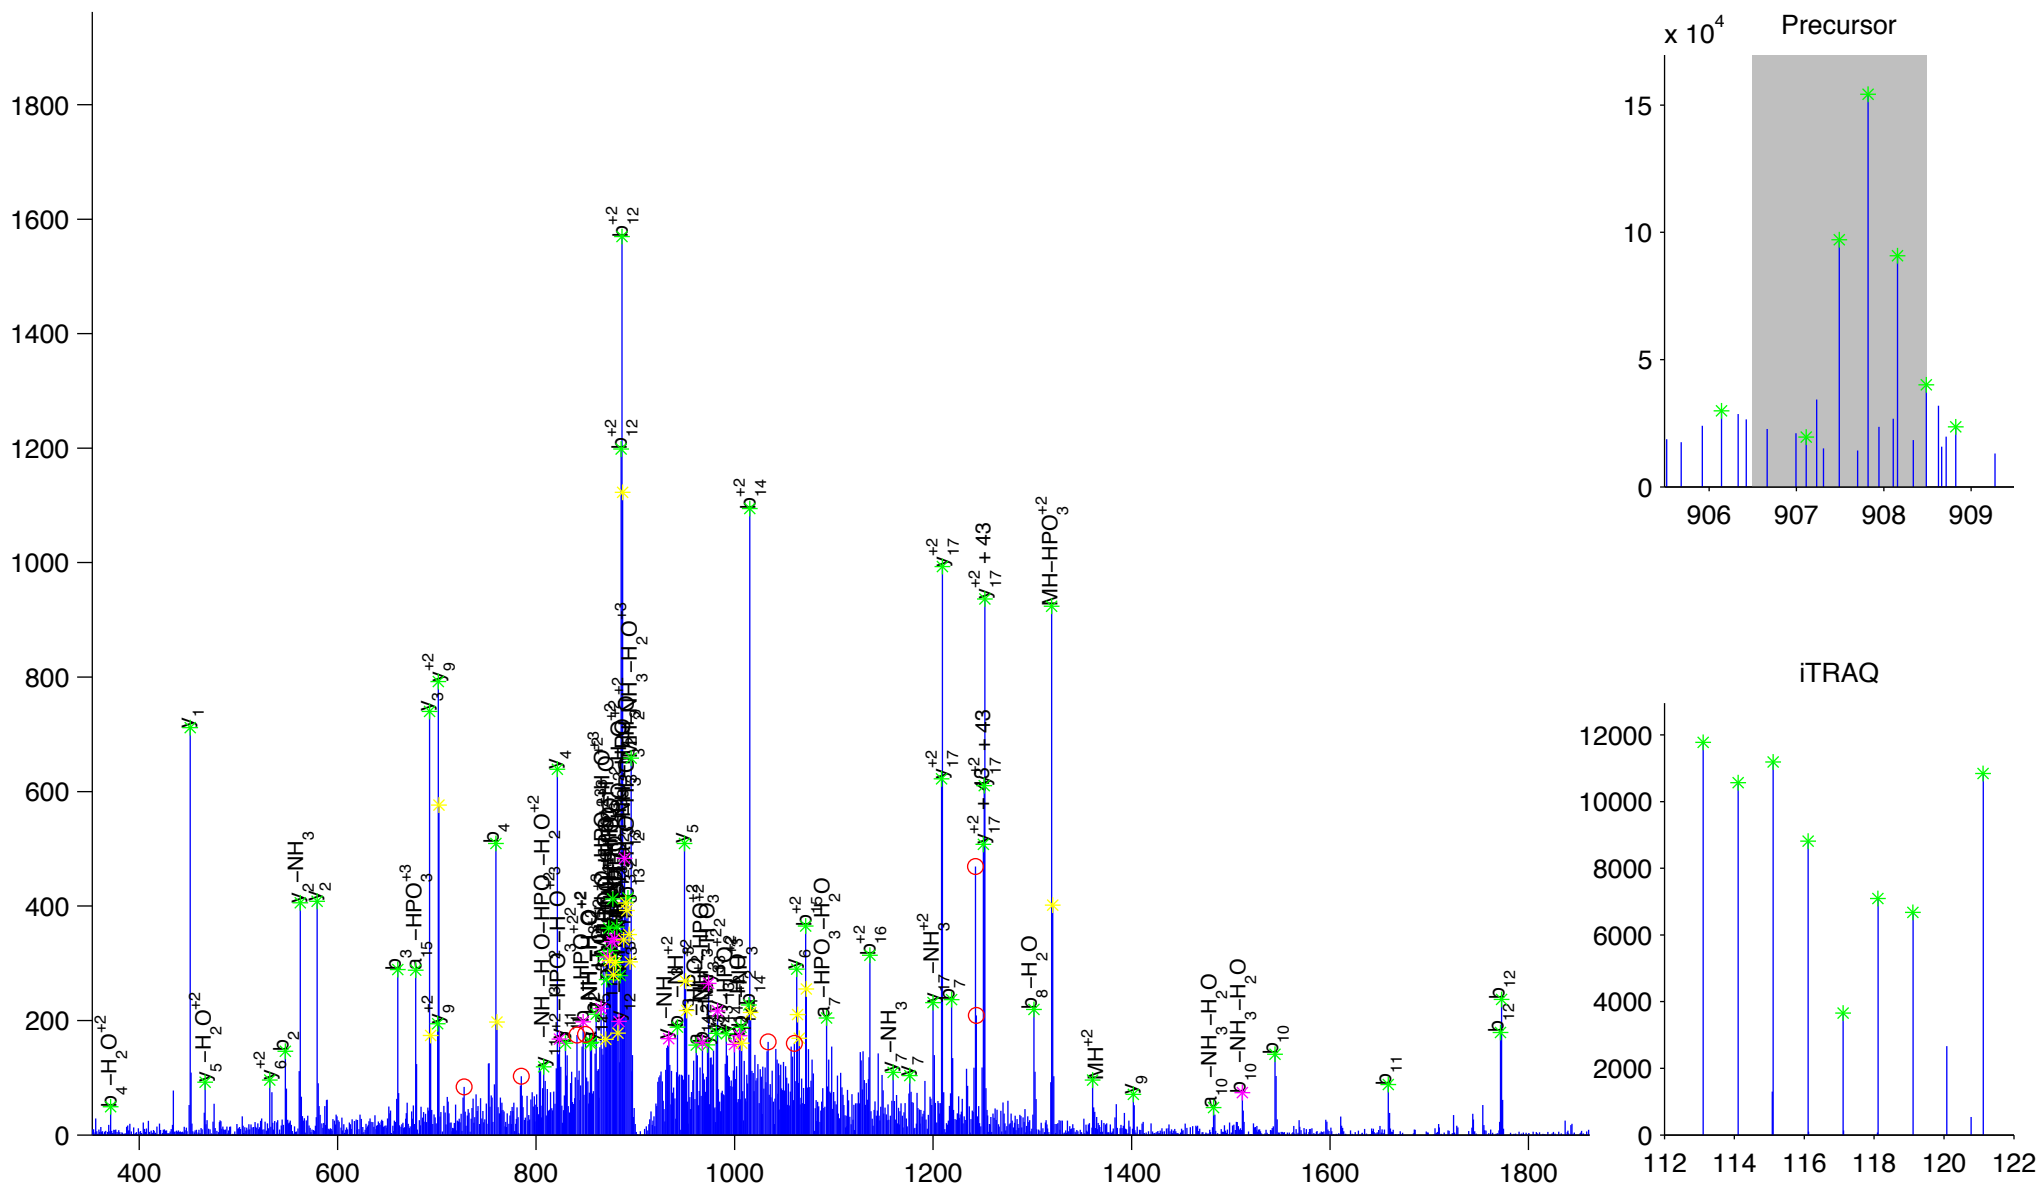



T L S E V D y A P G P G R

inositol polyphosphate phosphatase-like 1

Charge State: +2

Scan Number: 4518

File Name: 090806ptp1blivers\_M\_NC2.raw

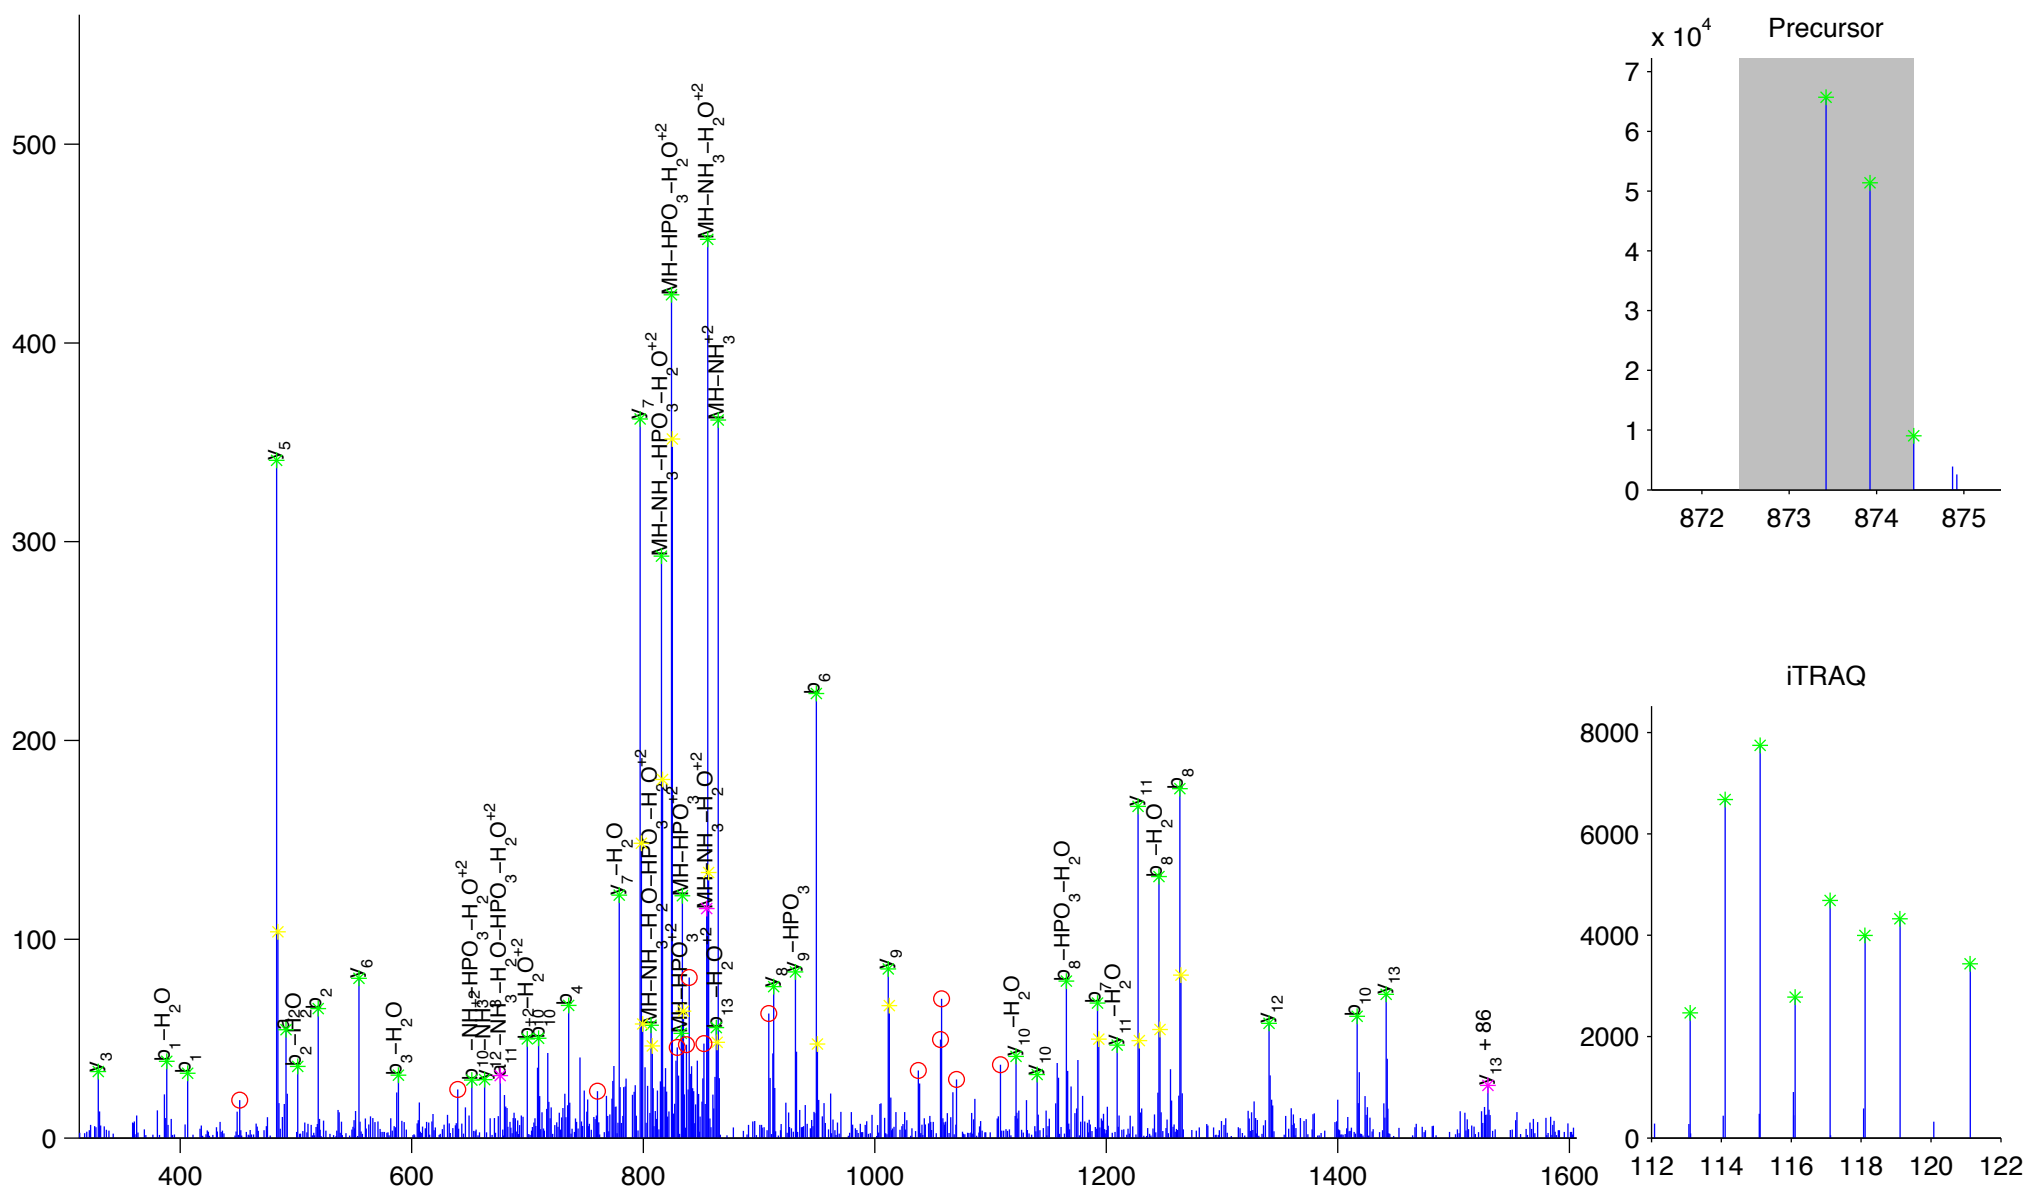

D I y E T D y Y R K

insulin receptor

Charge State: +3

Scan Number: 4193

File Name: 090728ptp1blivers\_M\_NC\_ins\_e.raw

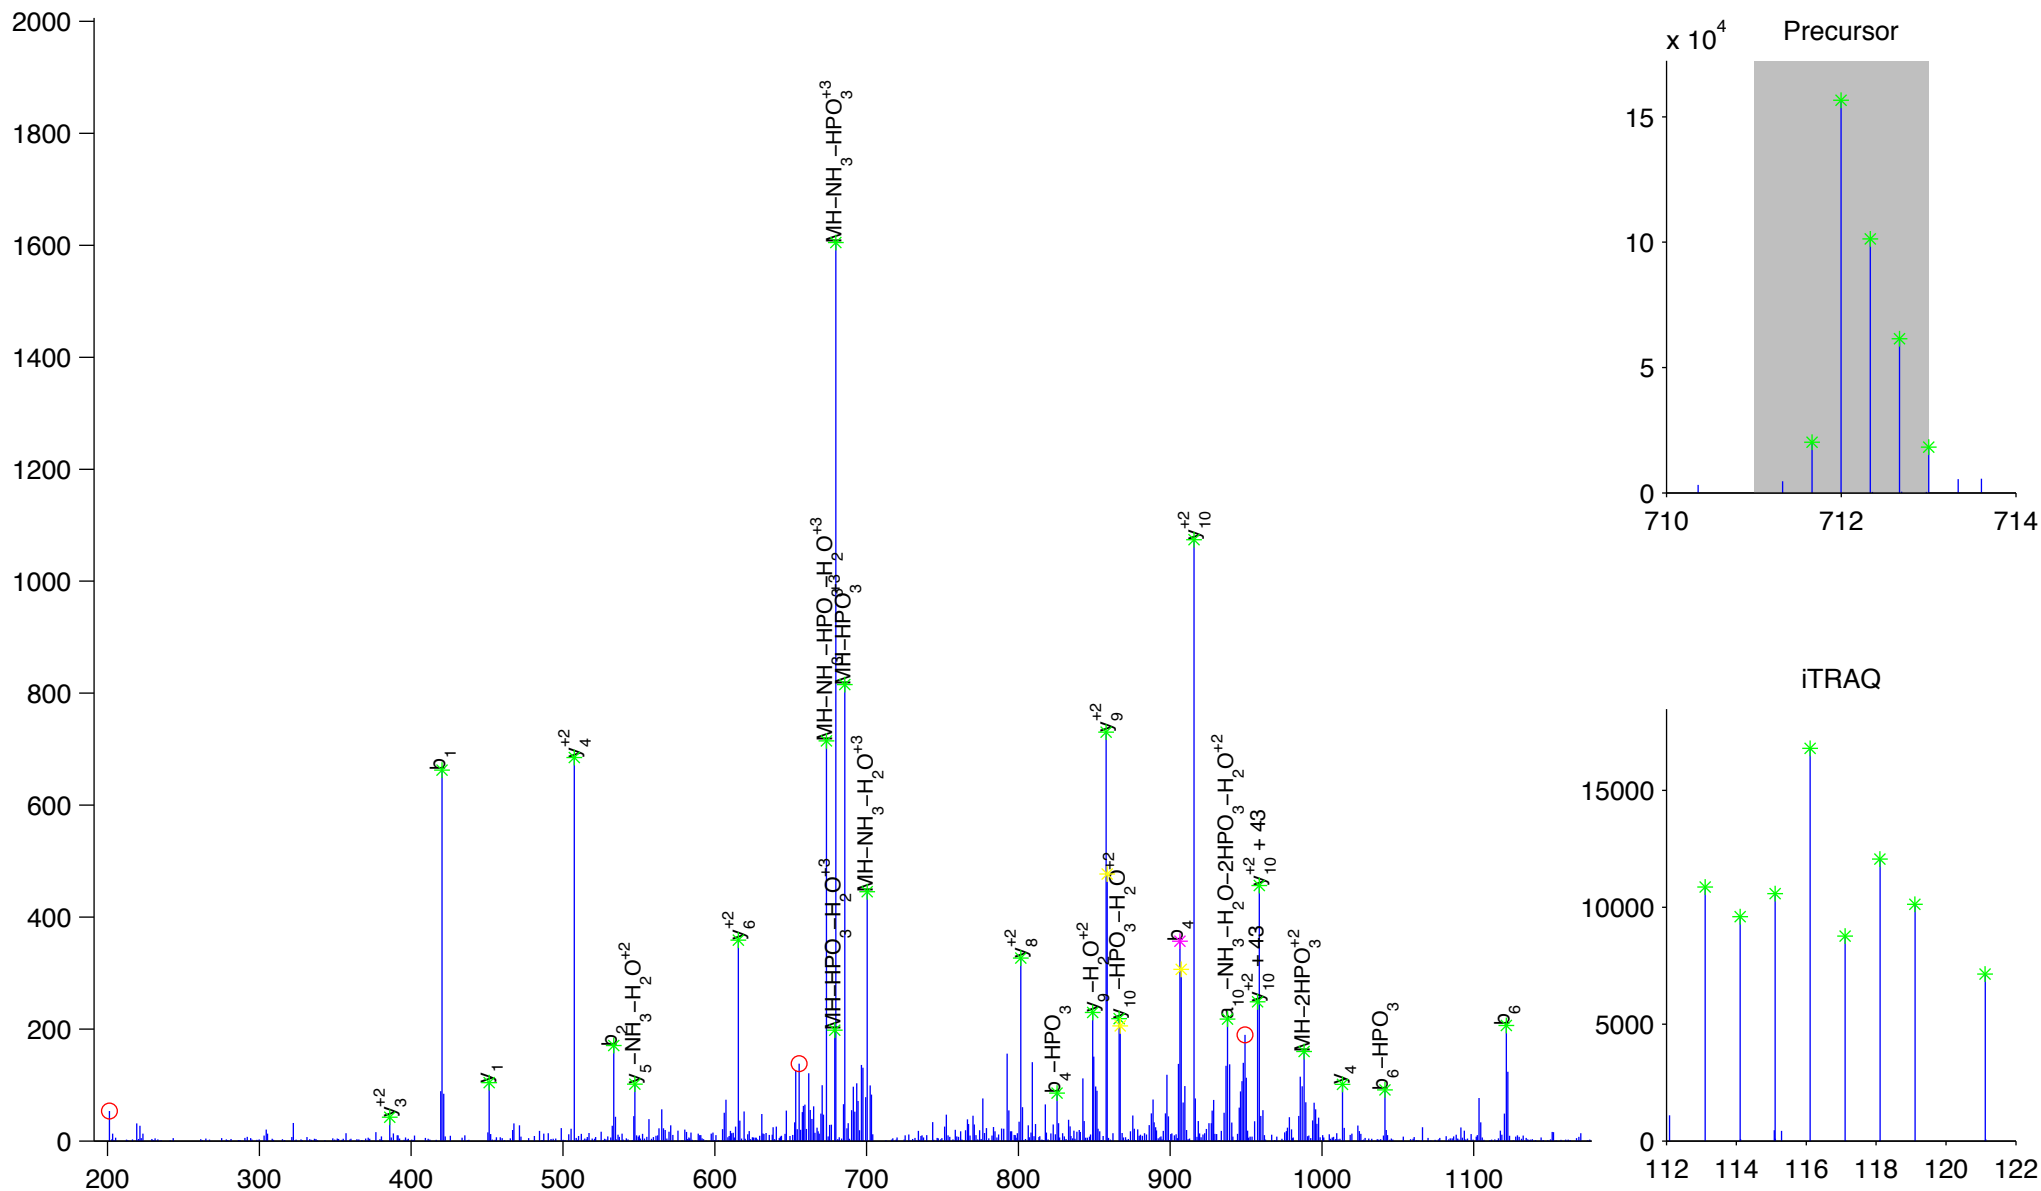

D I y E T D Y Y R

insulin receptor

Charge State: +2

Scan Number: 4485

File Name: 090806ptp1blivers\_M\_NC2.raw

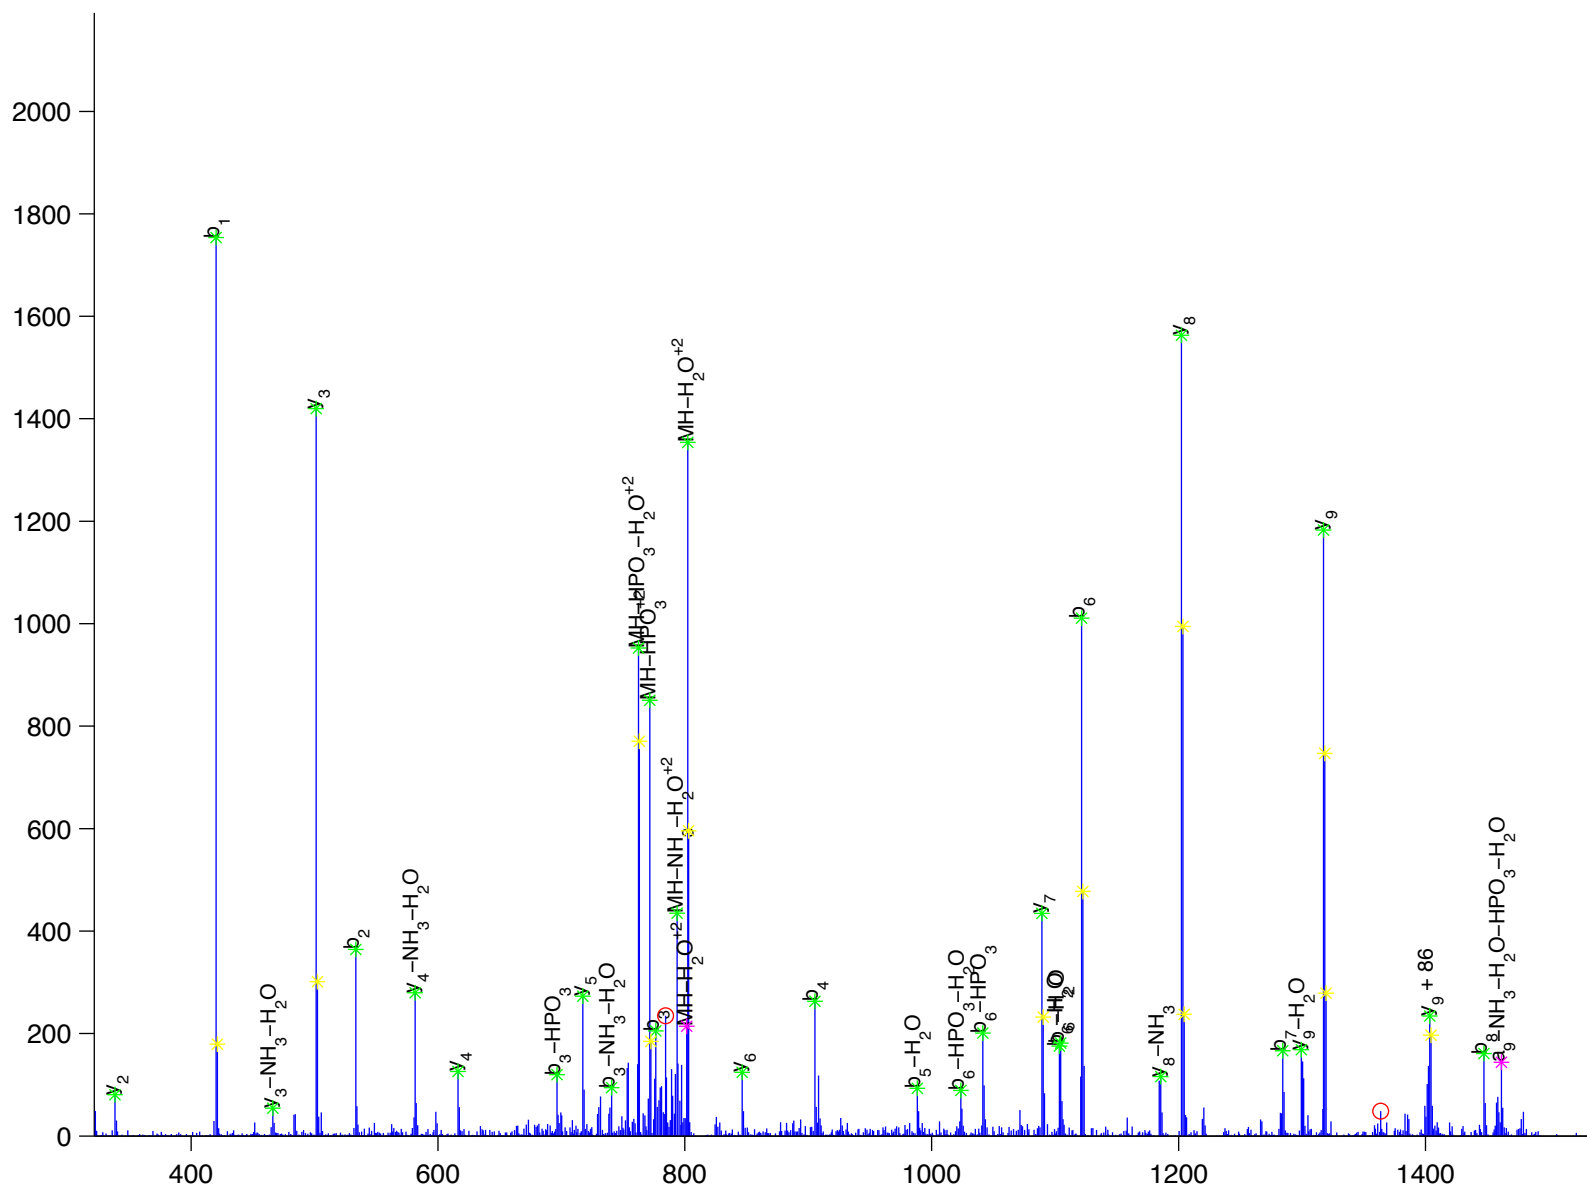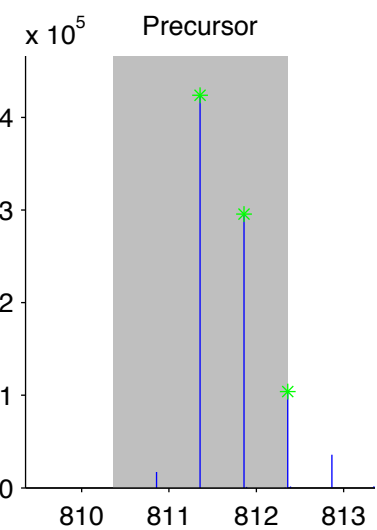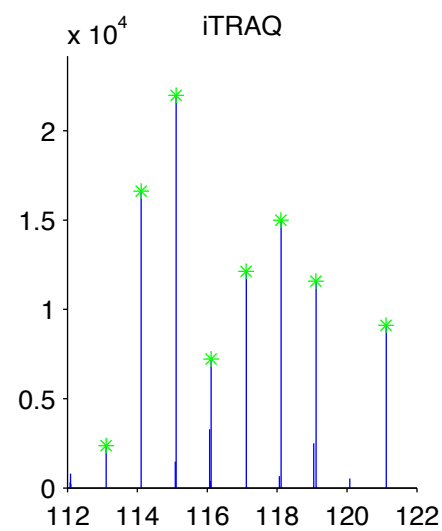

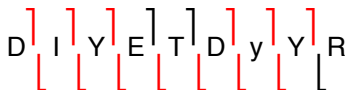

insulin receptor

Charge State: +2

Scan Number: 4485

File Name: 090806ptp1blivers\_M\_NC2.raw

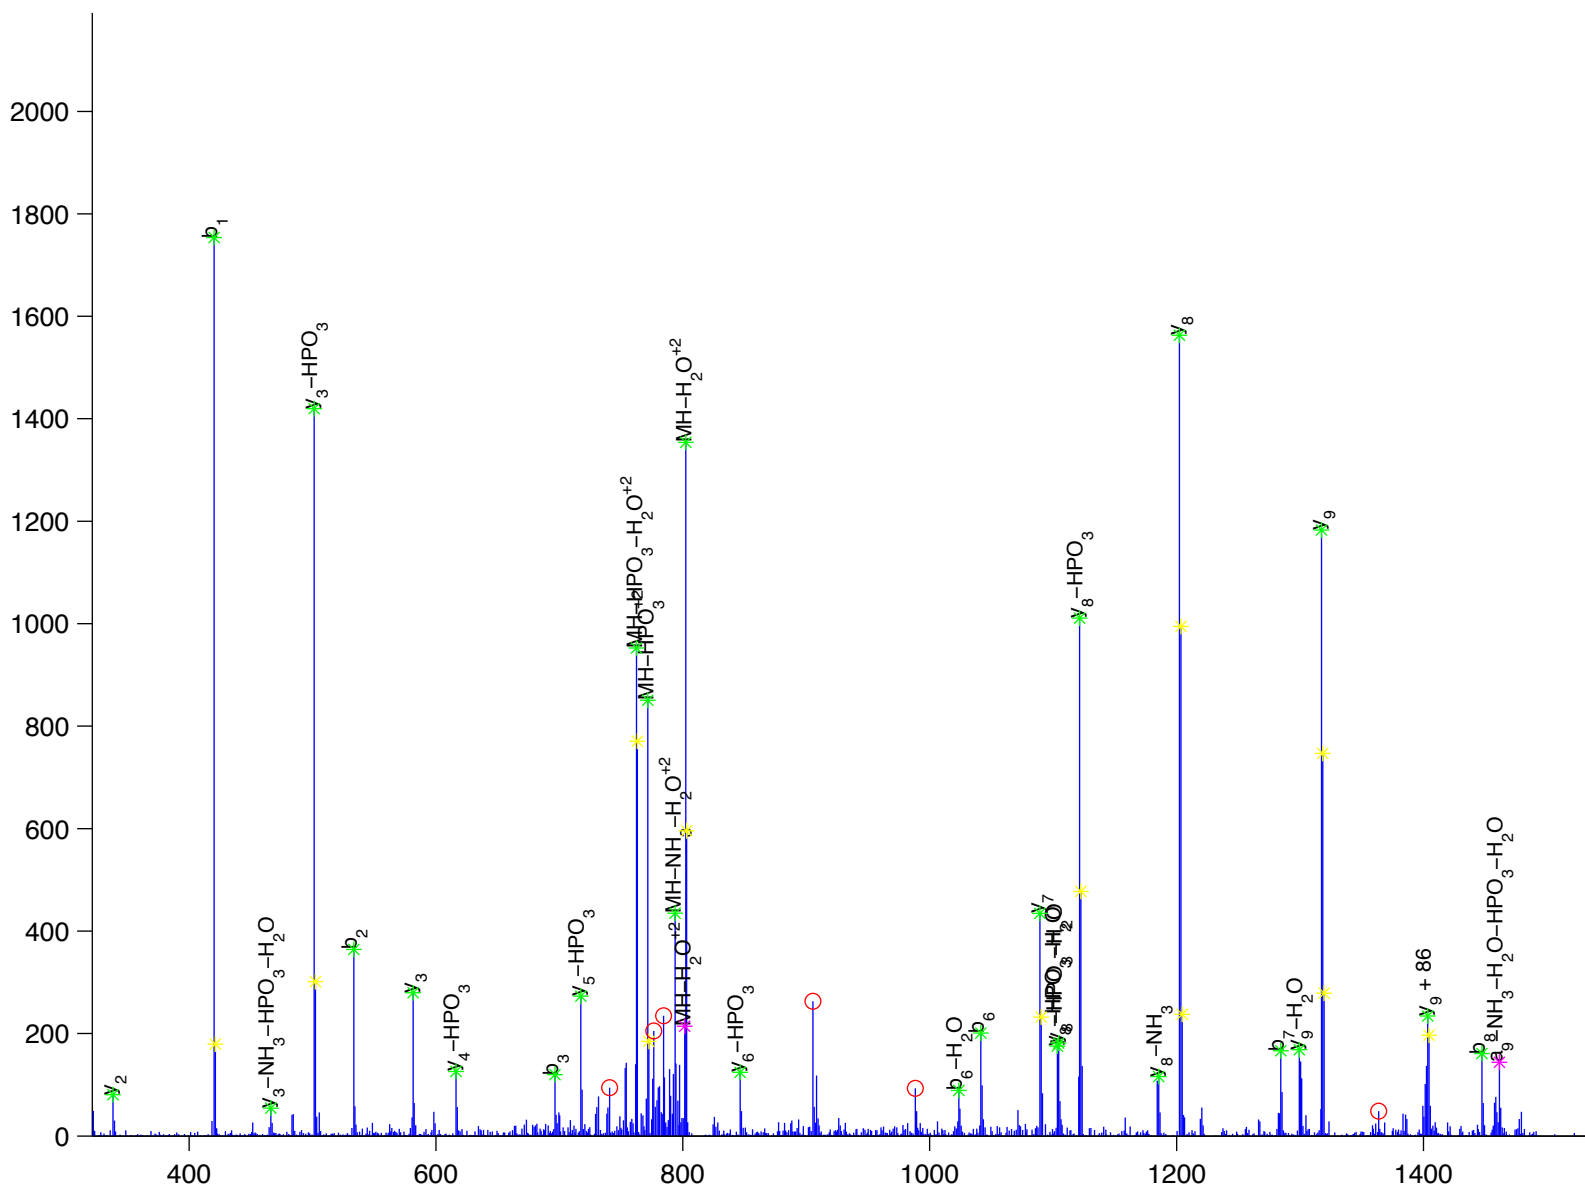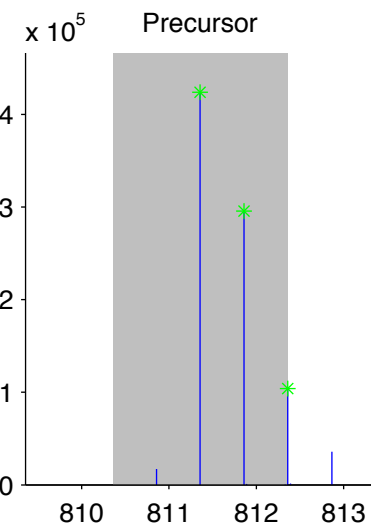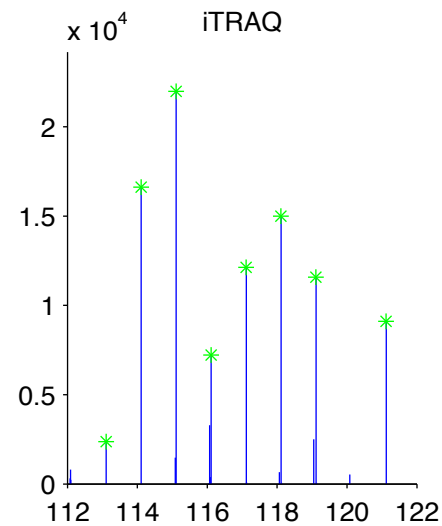

G[E]E[E]L[S]N[y]I[C]M[G]G[K]

insulin receptor substrate 1

Charge State: +3

Scan Number: 4877

File Name: 090728ptp1blivers\_M\_NC\_ins\_e.raw

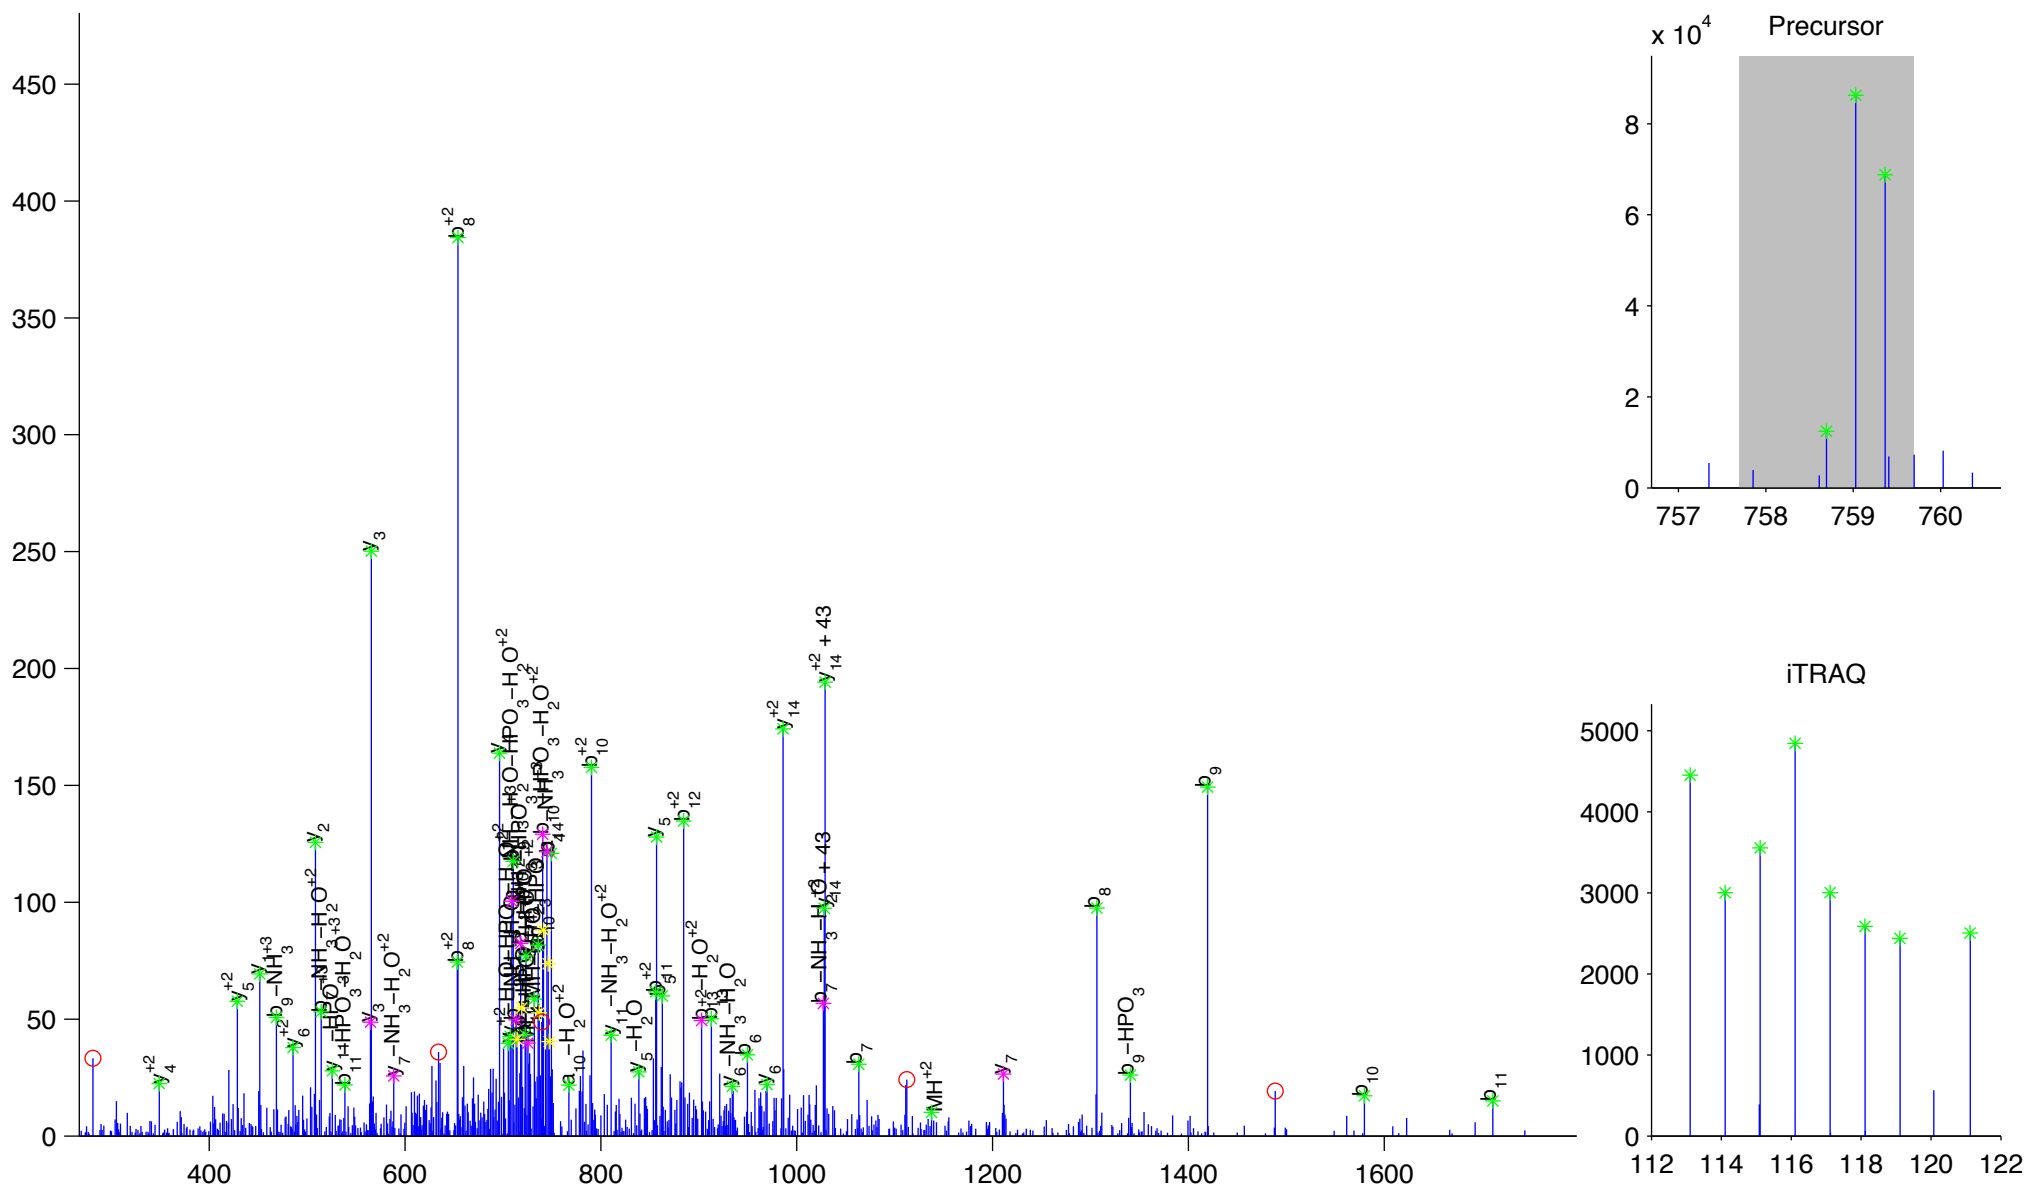

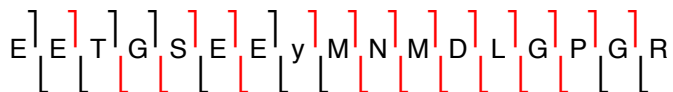

insulin receptor substrate 1

Charge State: +3

Scan Number: 5251

File Name: 090806ptp1blivers\_M\_NC2.raw

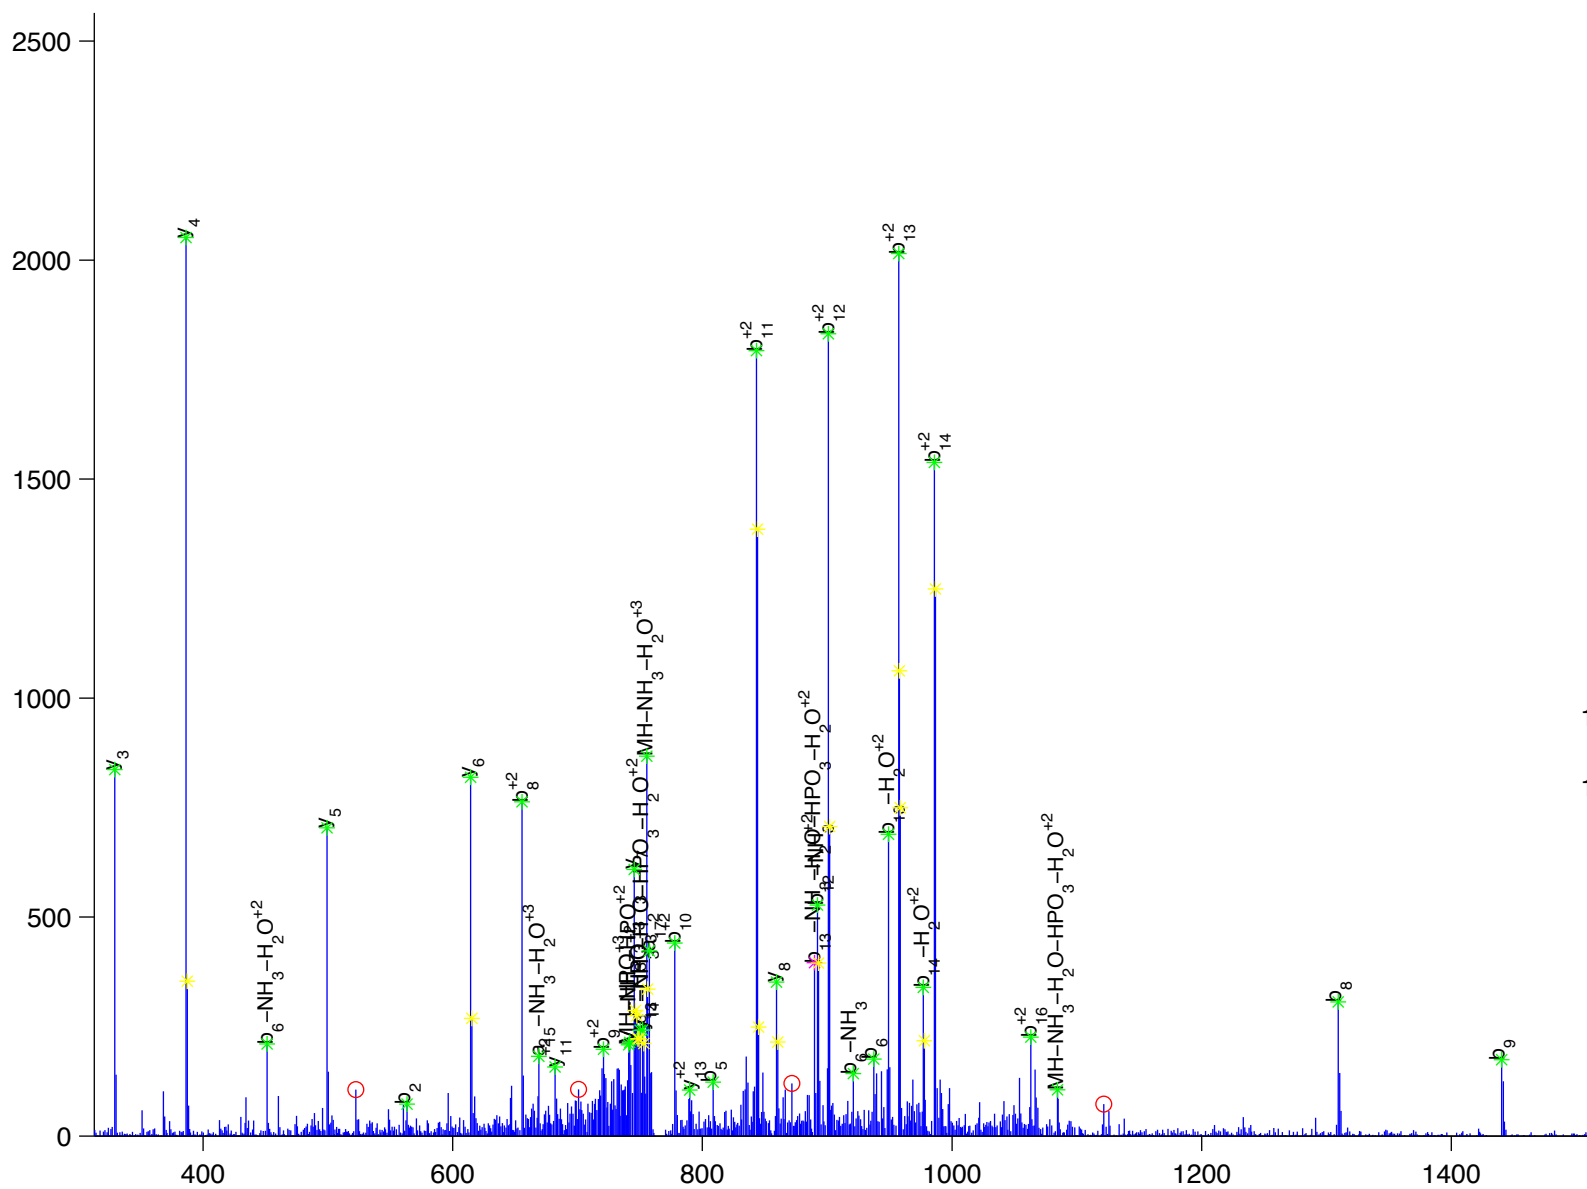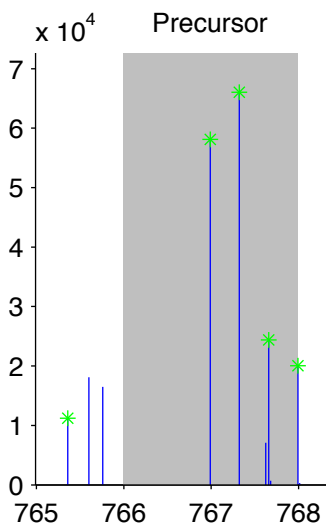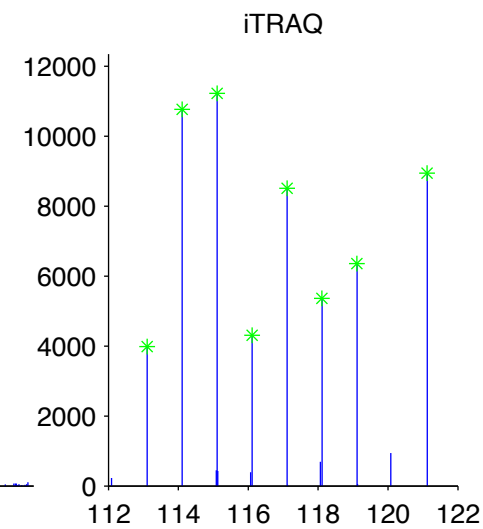

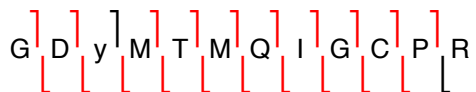

insulin receptor substrate 1

Charge State: +2

Scan Number: 5562

File Name: 090806ptp1blivers\_M\_NC2.raw

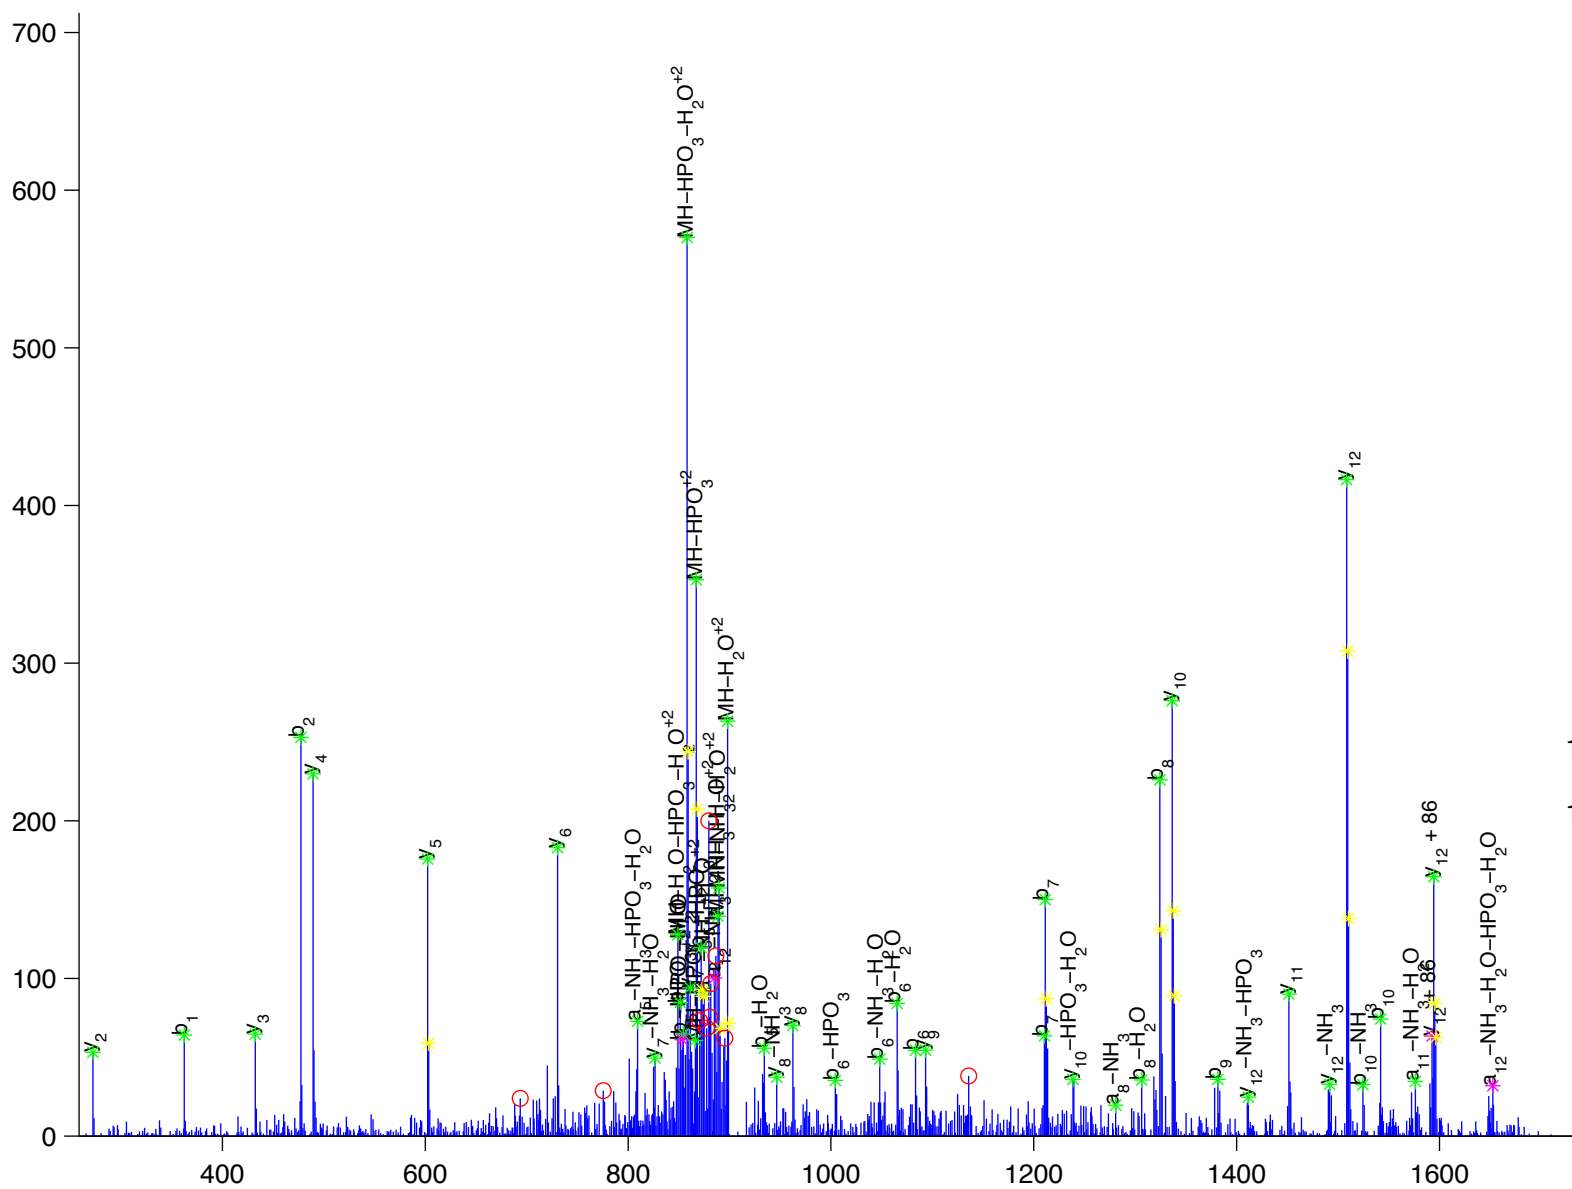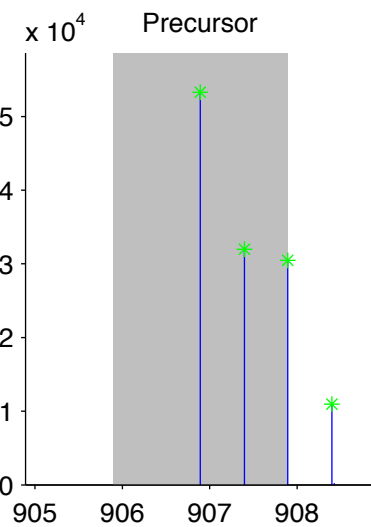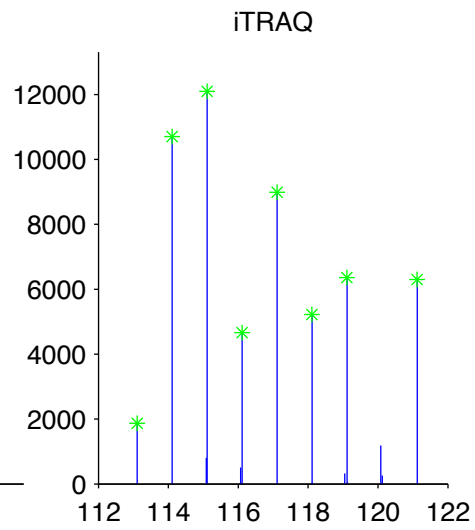

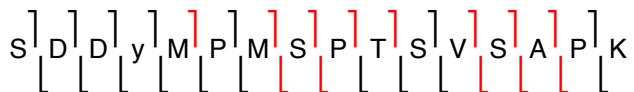

insulin receptor substrate 2

Charge State: +3

Scan Number: 5157

File Name: 090806ptp1blivers\_M\_NC2.raw

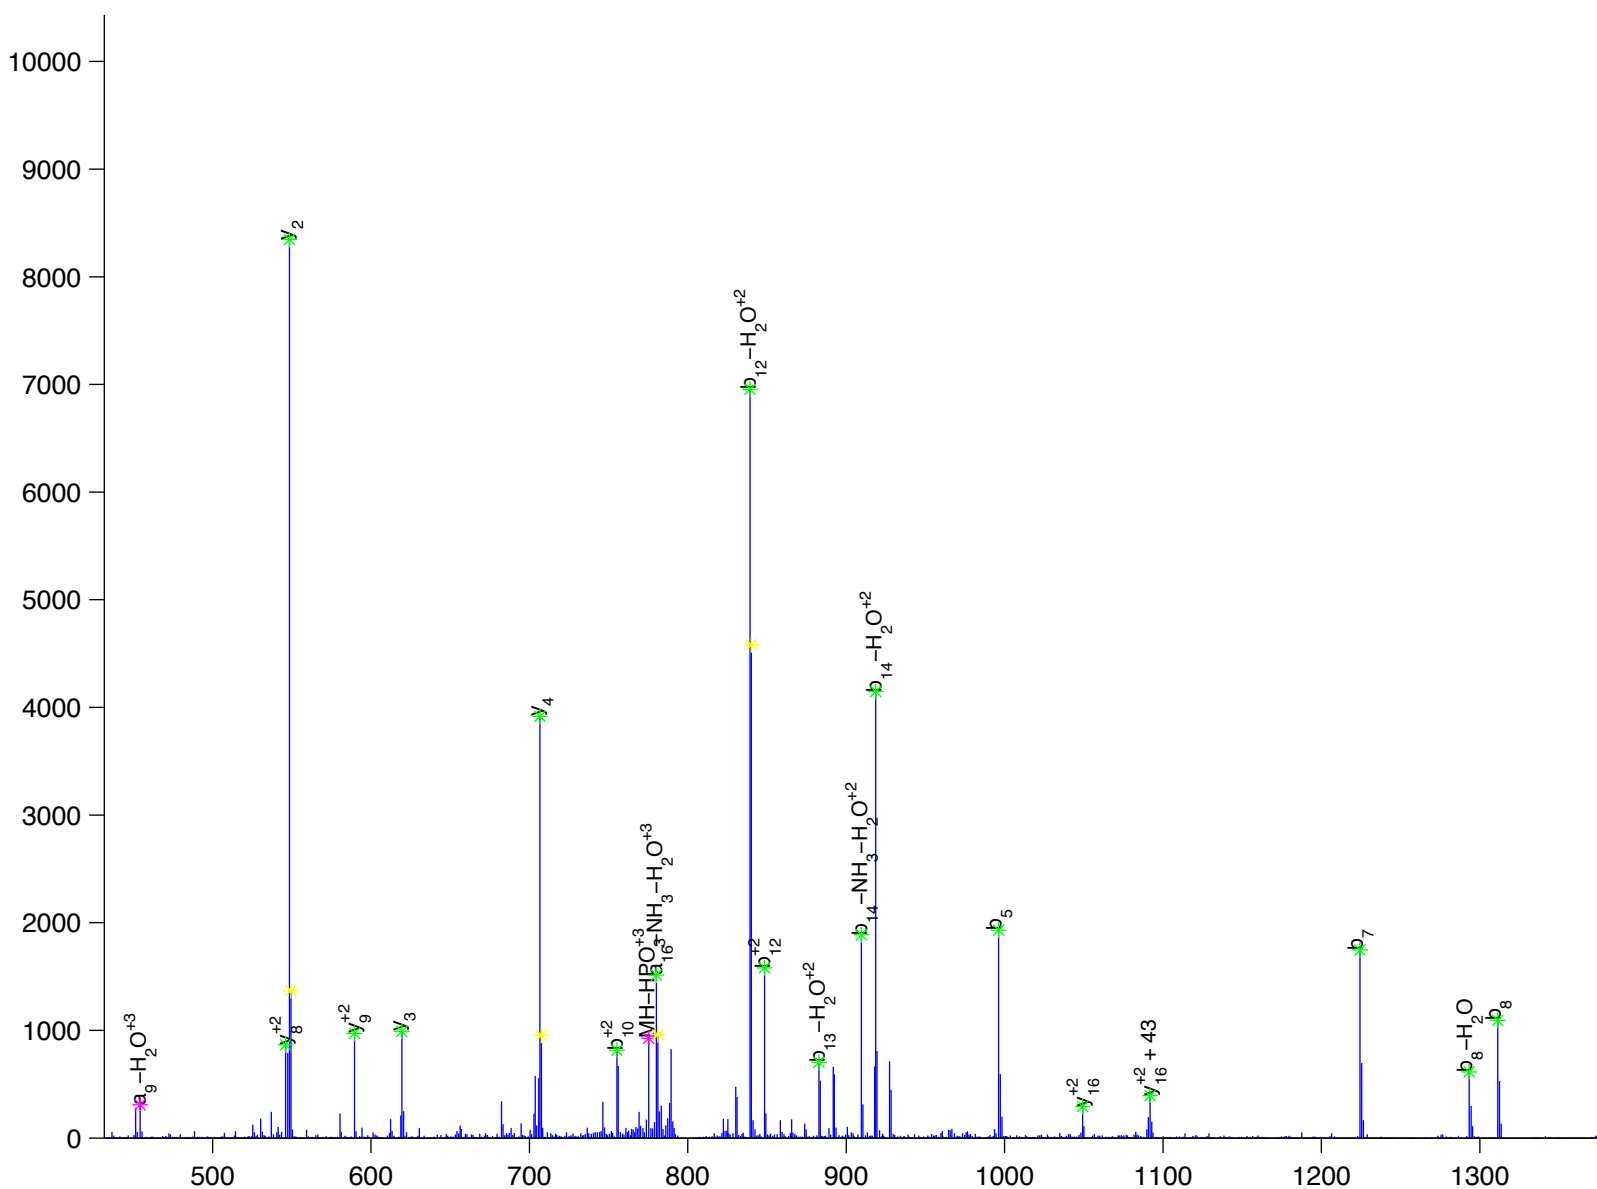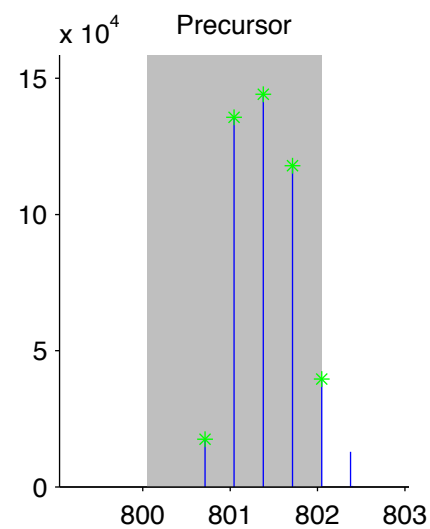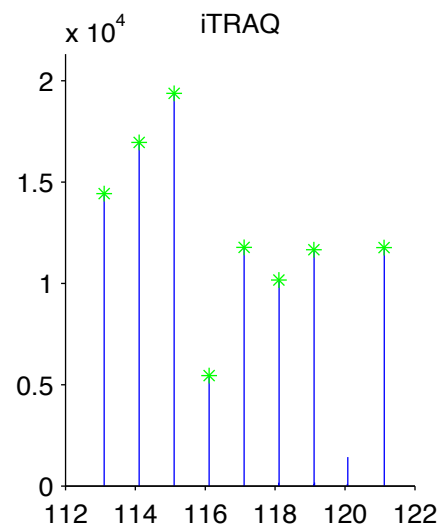



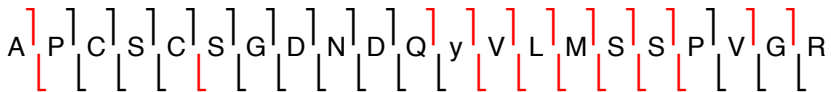

insulin receptor substrate 2

Charge State: +3

Scan Number: 5779

File Name: 091130ptp1blivers\_hfd\_basal2.raw

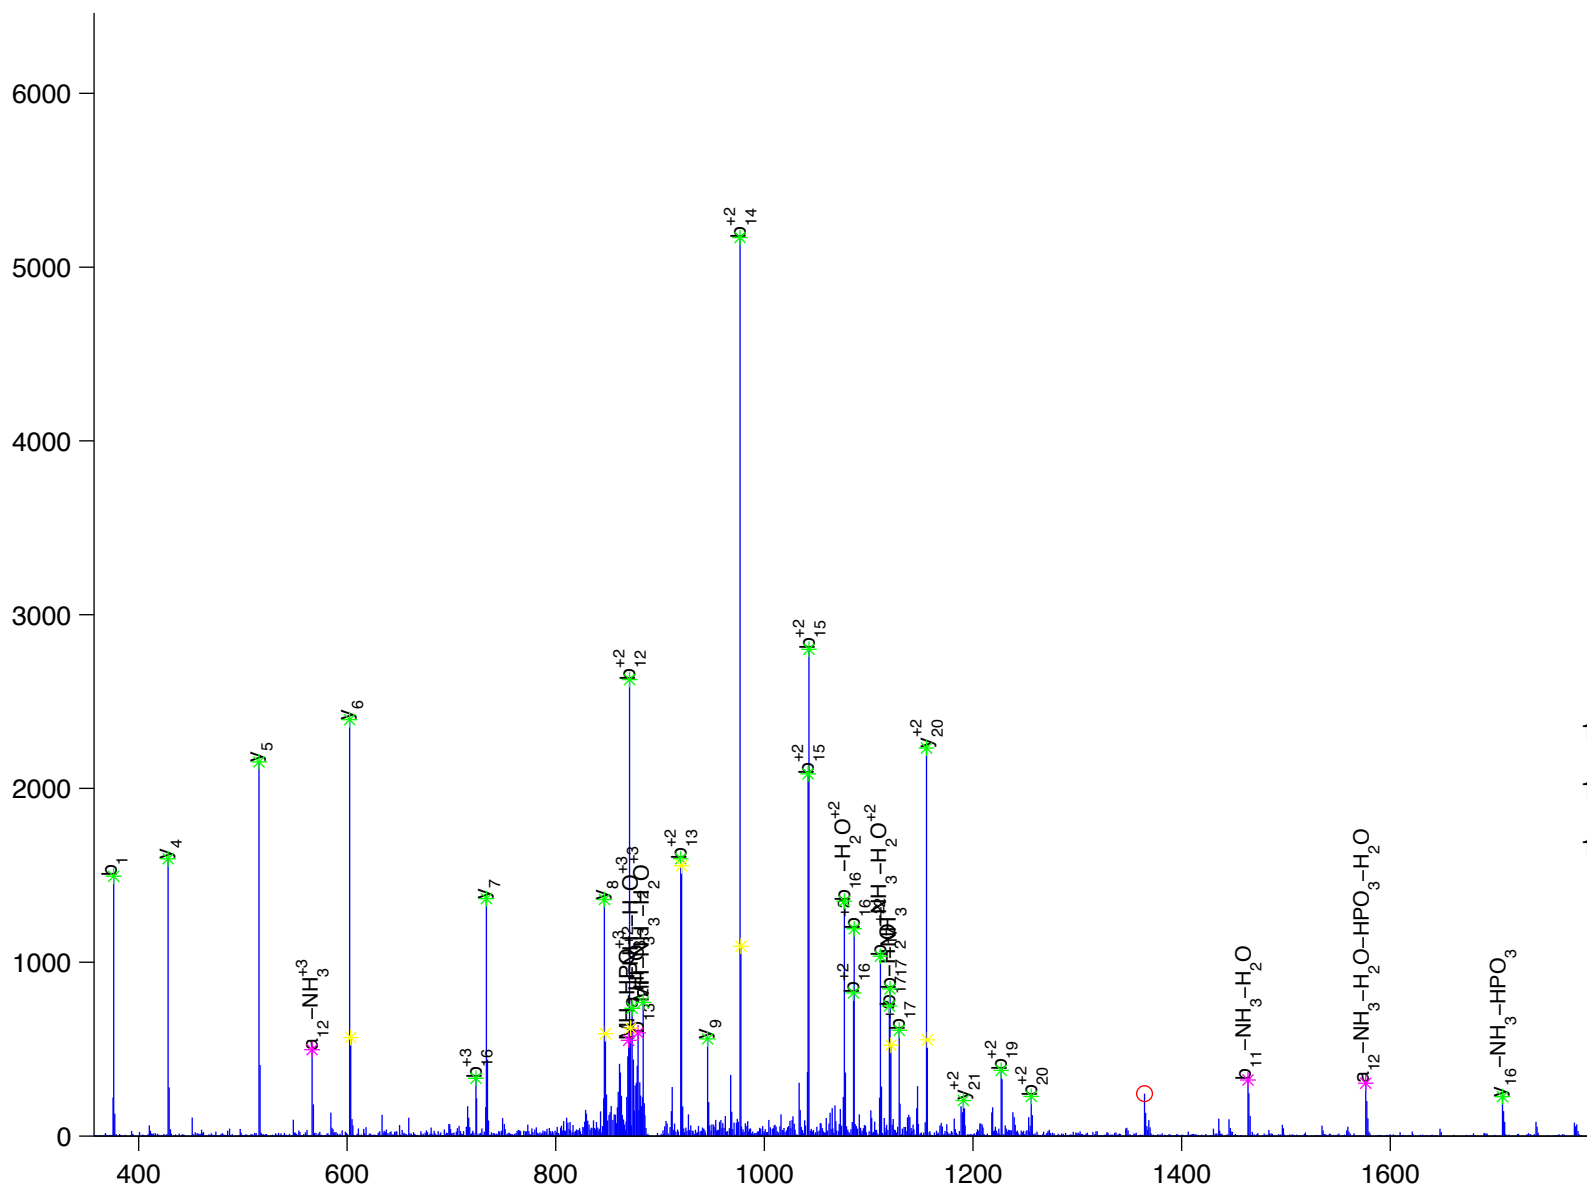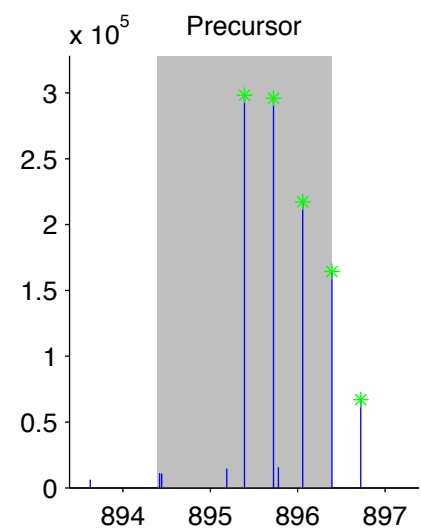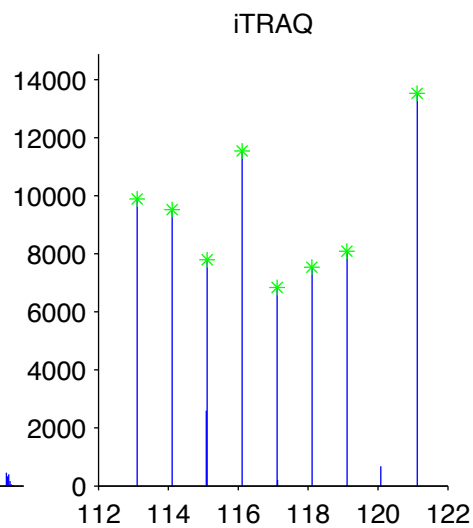

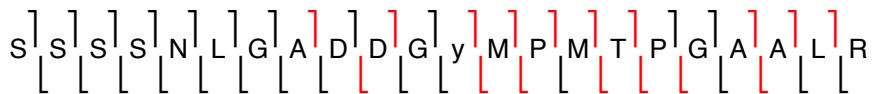

insulin receptor substrate 2

Charge State: +3

Scan Number: 6281

File Name: 091130ptp1blivers\_hfd\_basal2.raw

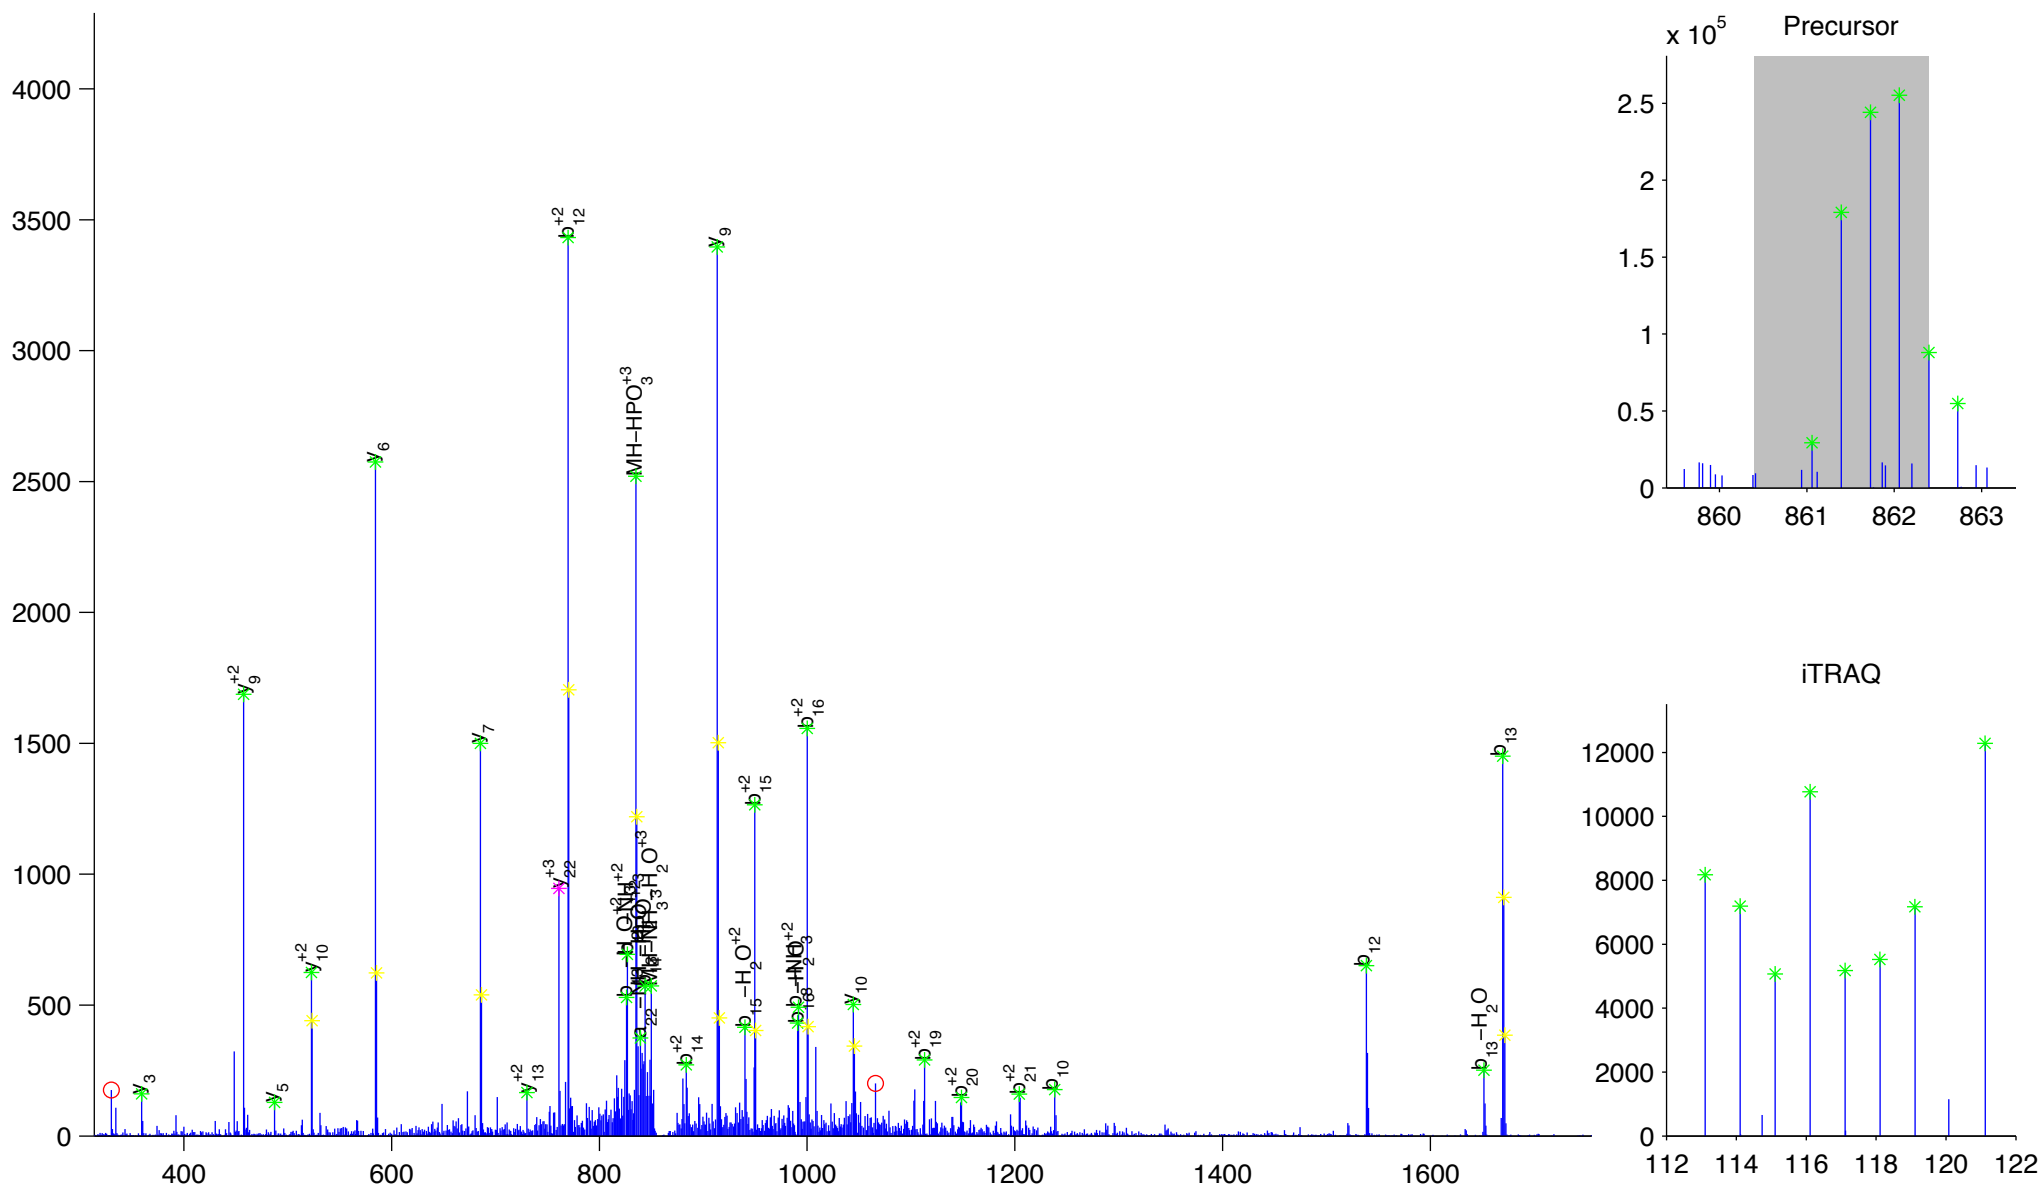

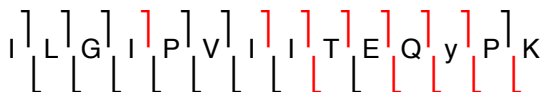

isochorismatase domain containing 1

Charge State: +3

Scan Number: 9032

File Name: 091130ptp1blivers\_hfd\_basal2.raw

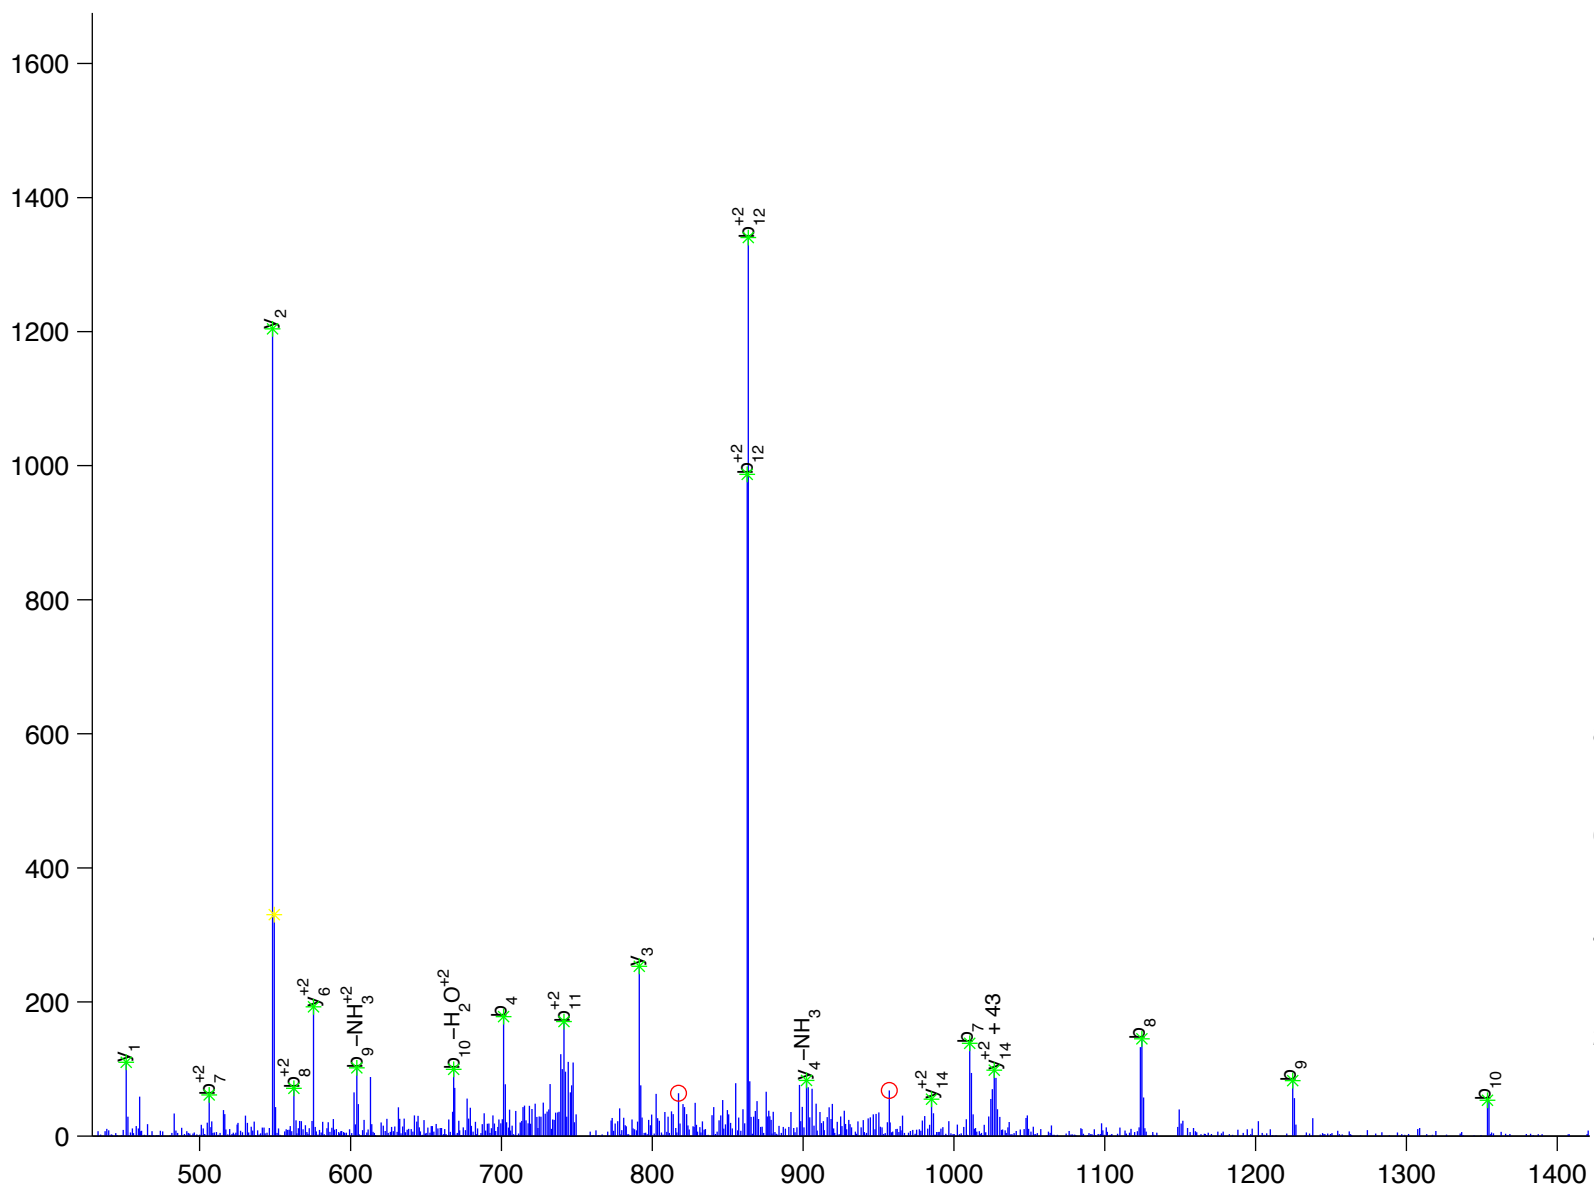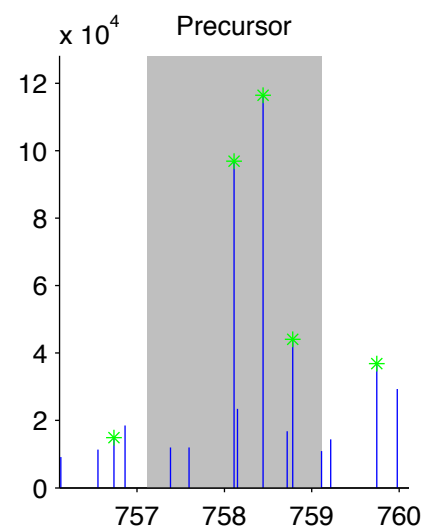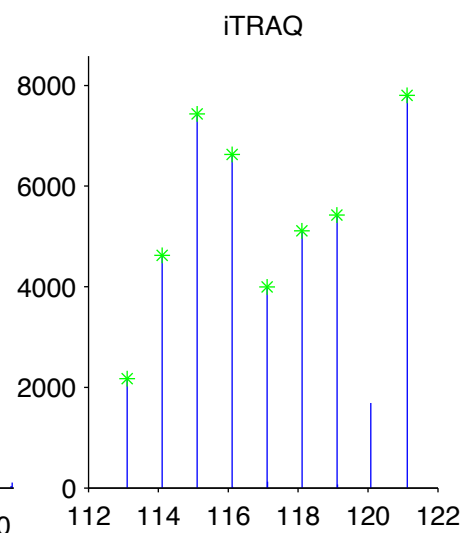



R [ E ] V [ G ] D [ y ] G [ Q ] L [ H ] K

Janus kinase 2

Charge State: +4

Scan Number: 3914

File Name: 091130ptp1blivers\_hfd\_basal2.raw

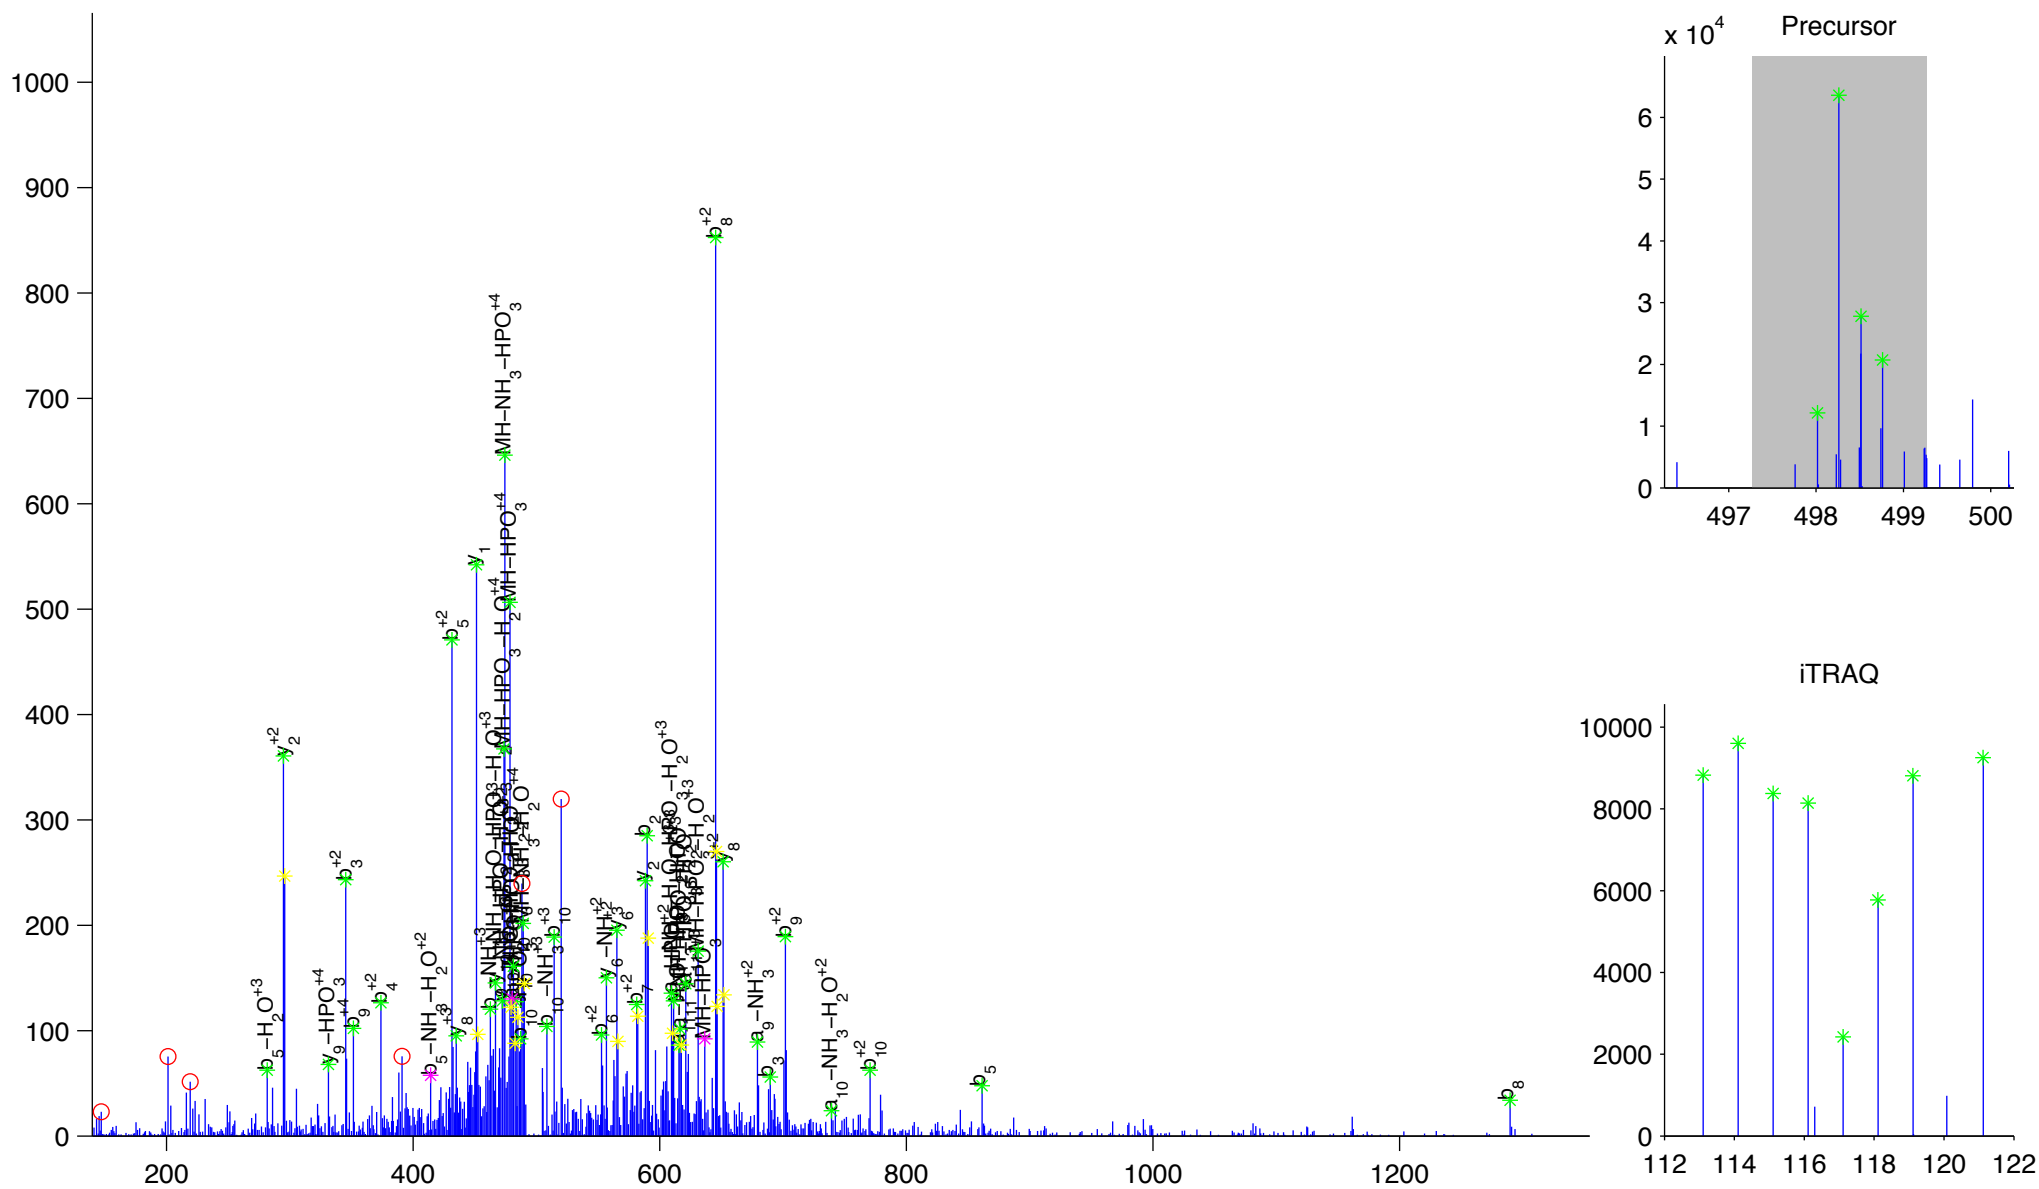

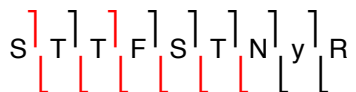

keratin 18

Charge State: +2

Scan Number: 4139

File Name: 091130ptp1blivers\_hfd\_basal2.raw

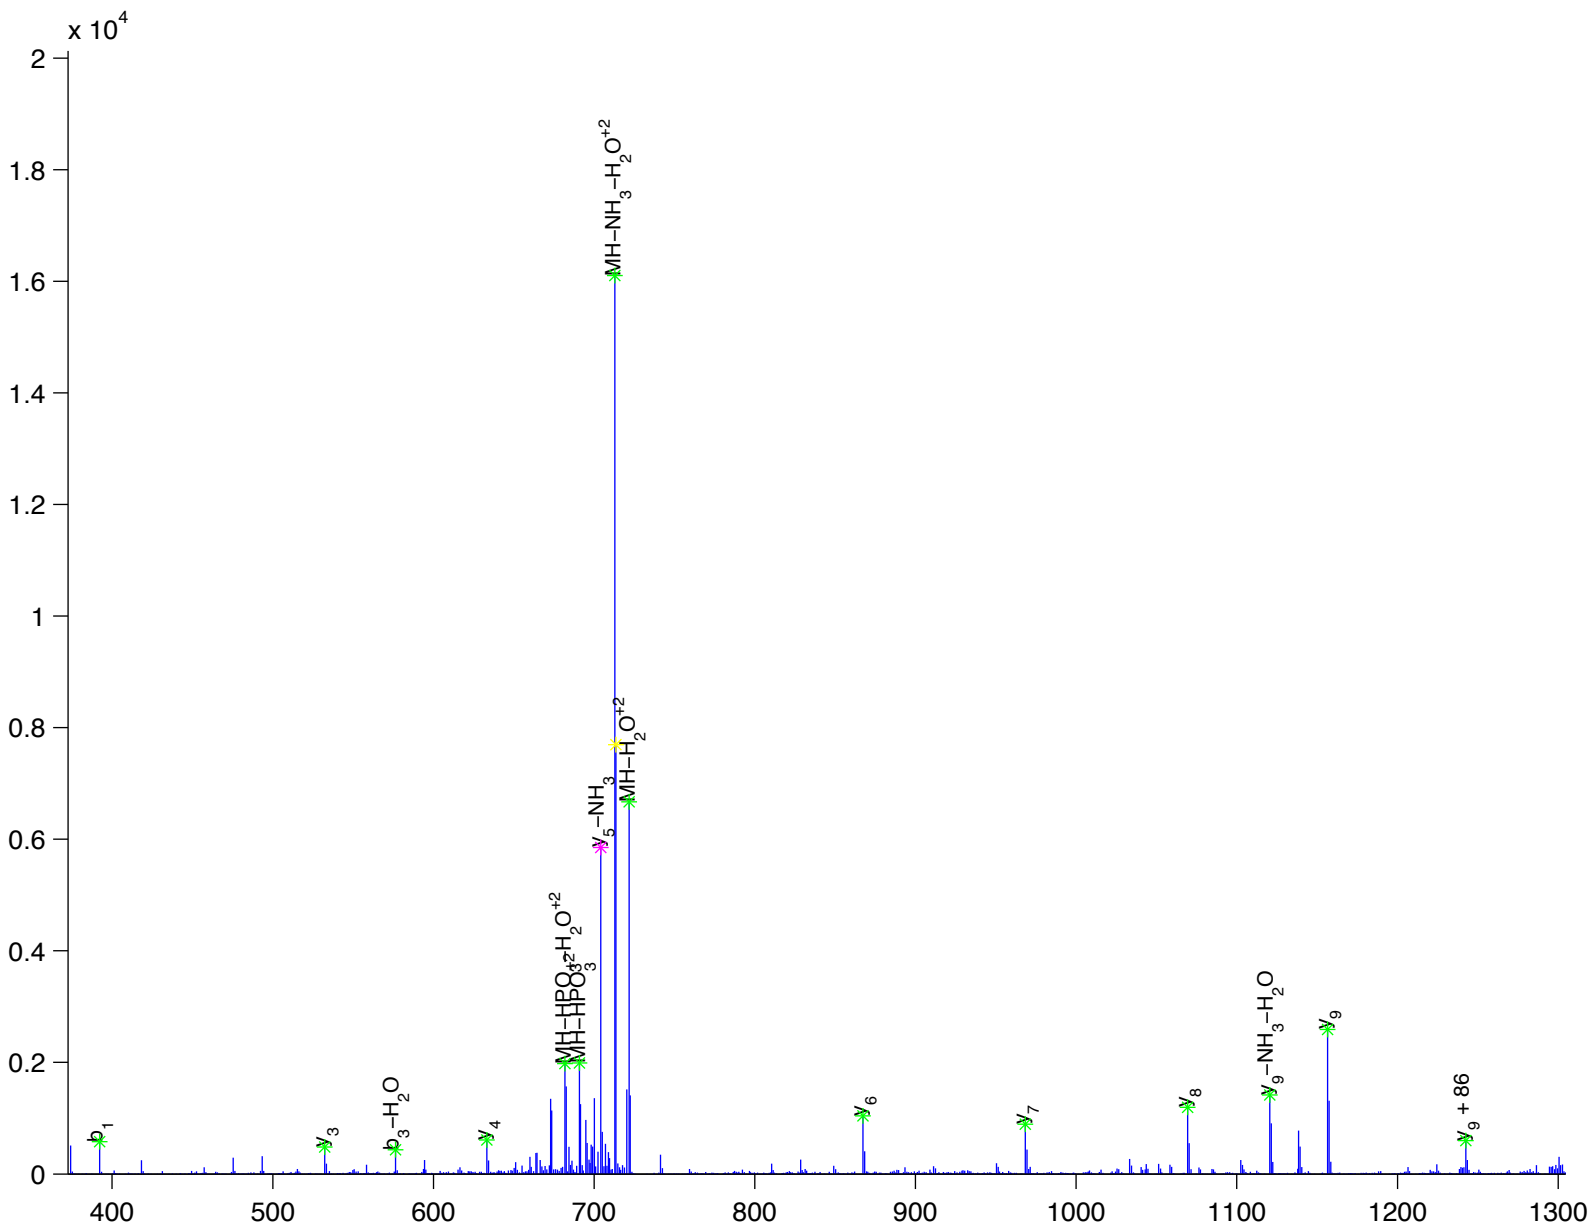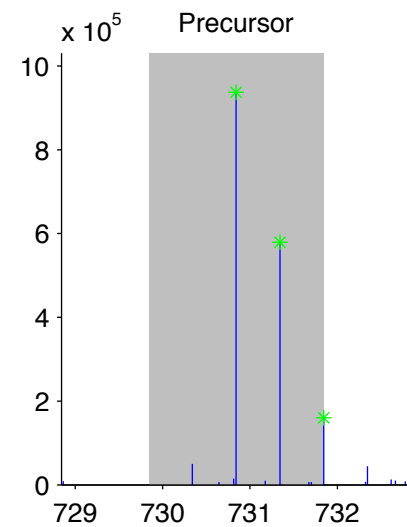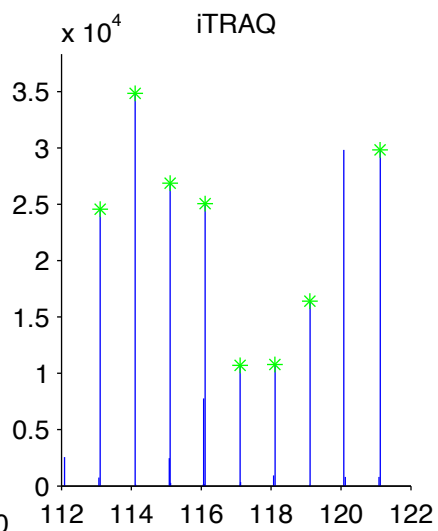

D[V]D[C]A]y[L]R

keratin complex 2, basic gene 18

Charge State: +2

Scan Number: 4005

File Name: 090806ptp1blivers\_M\_NC2.raw

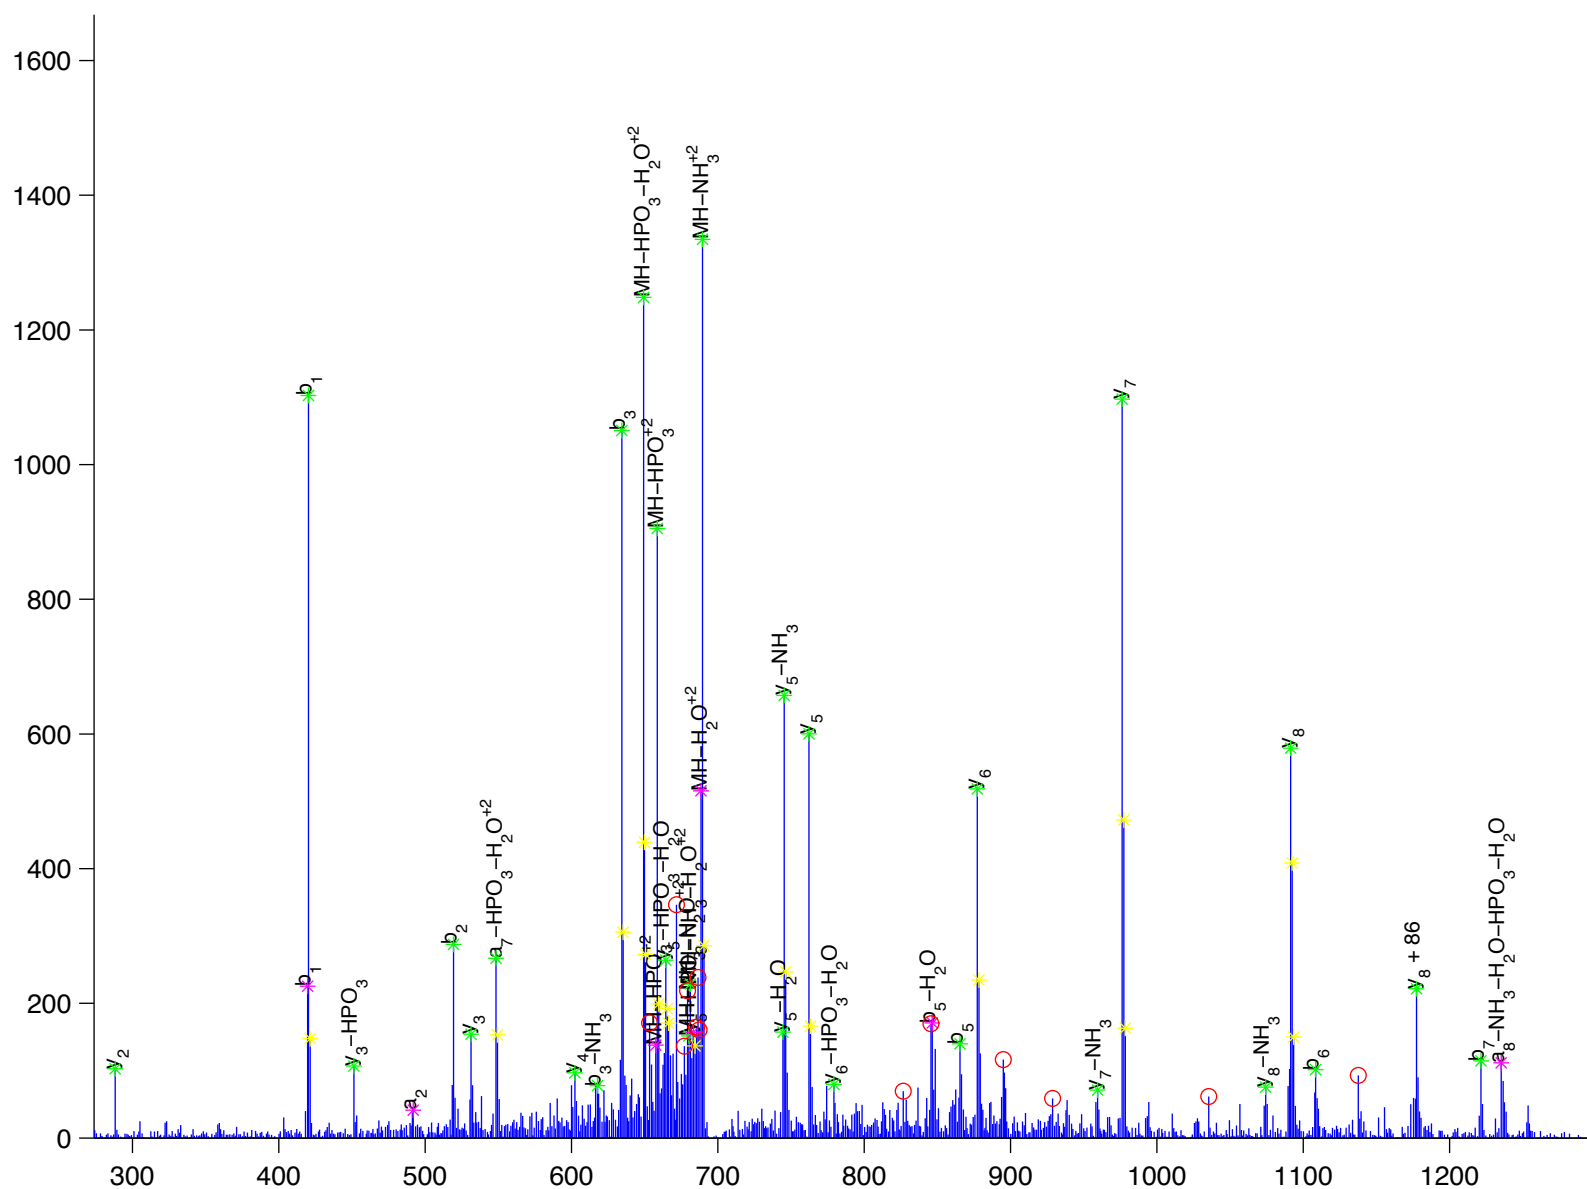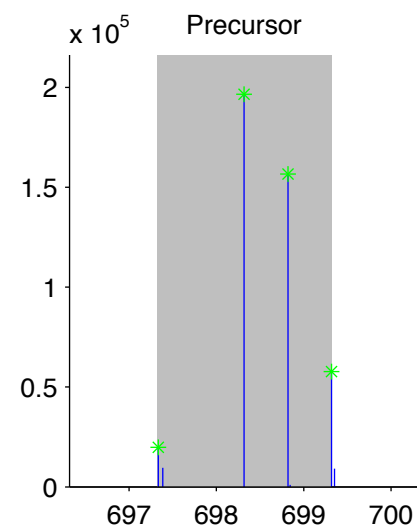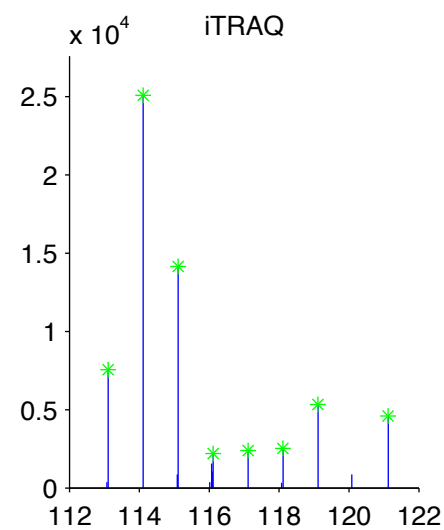

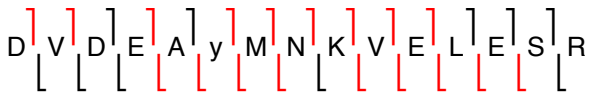

keratin complex 2, basic, gene 8

Charge State: +

Scan Number: 4188

File Name: 100905ptp1blivers\_ncHFD\_basal.raw

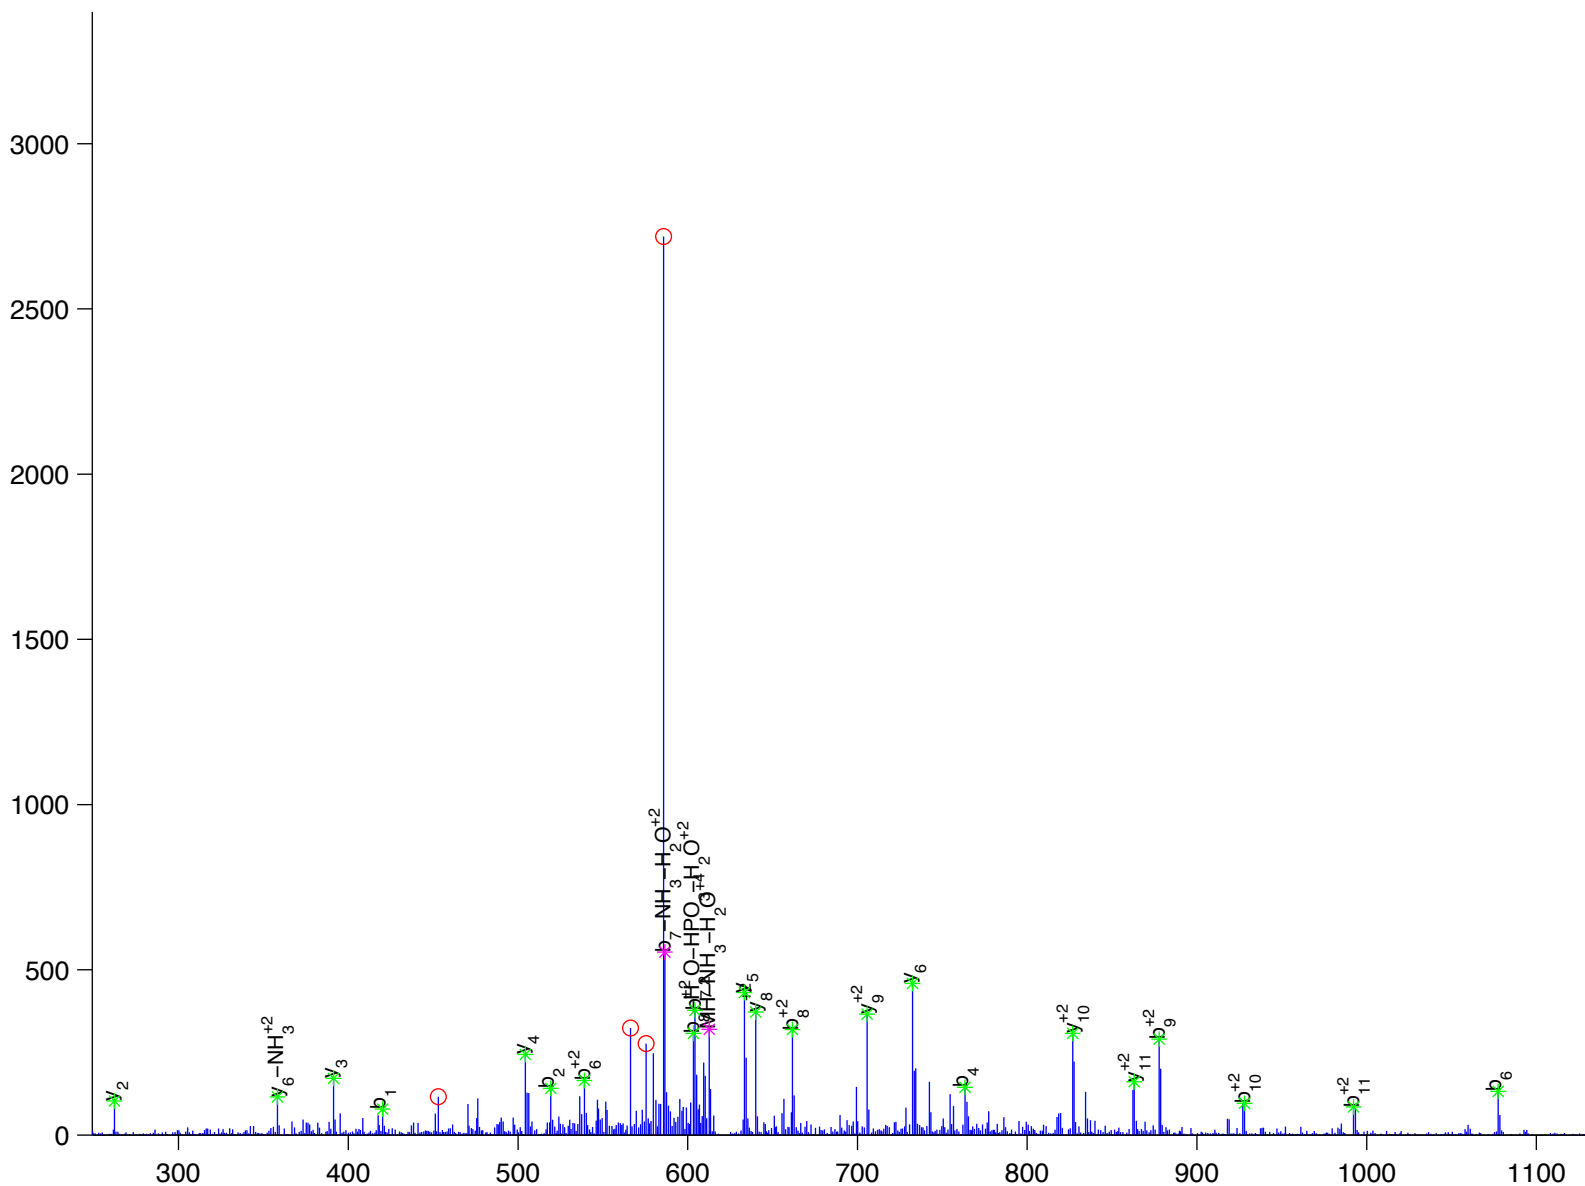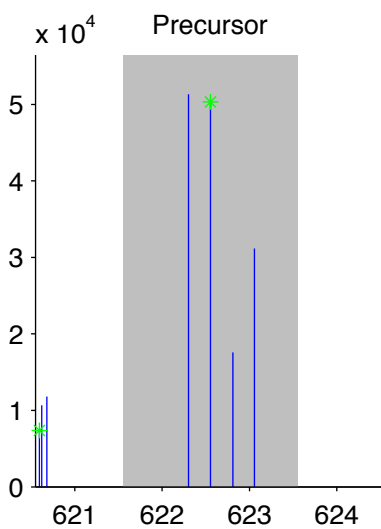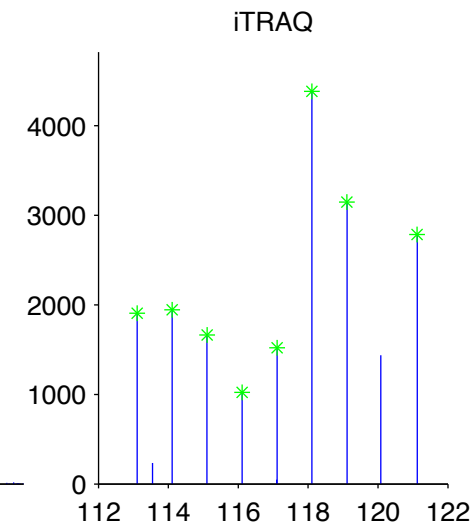



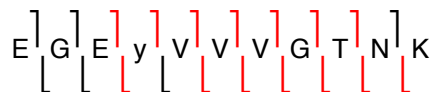

kinesin family member 13B

Charge State: +3

Scan Number: 4596

File Name: 091130ptp1blivers\_hfd\_basal2.raw

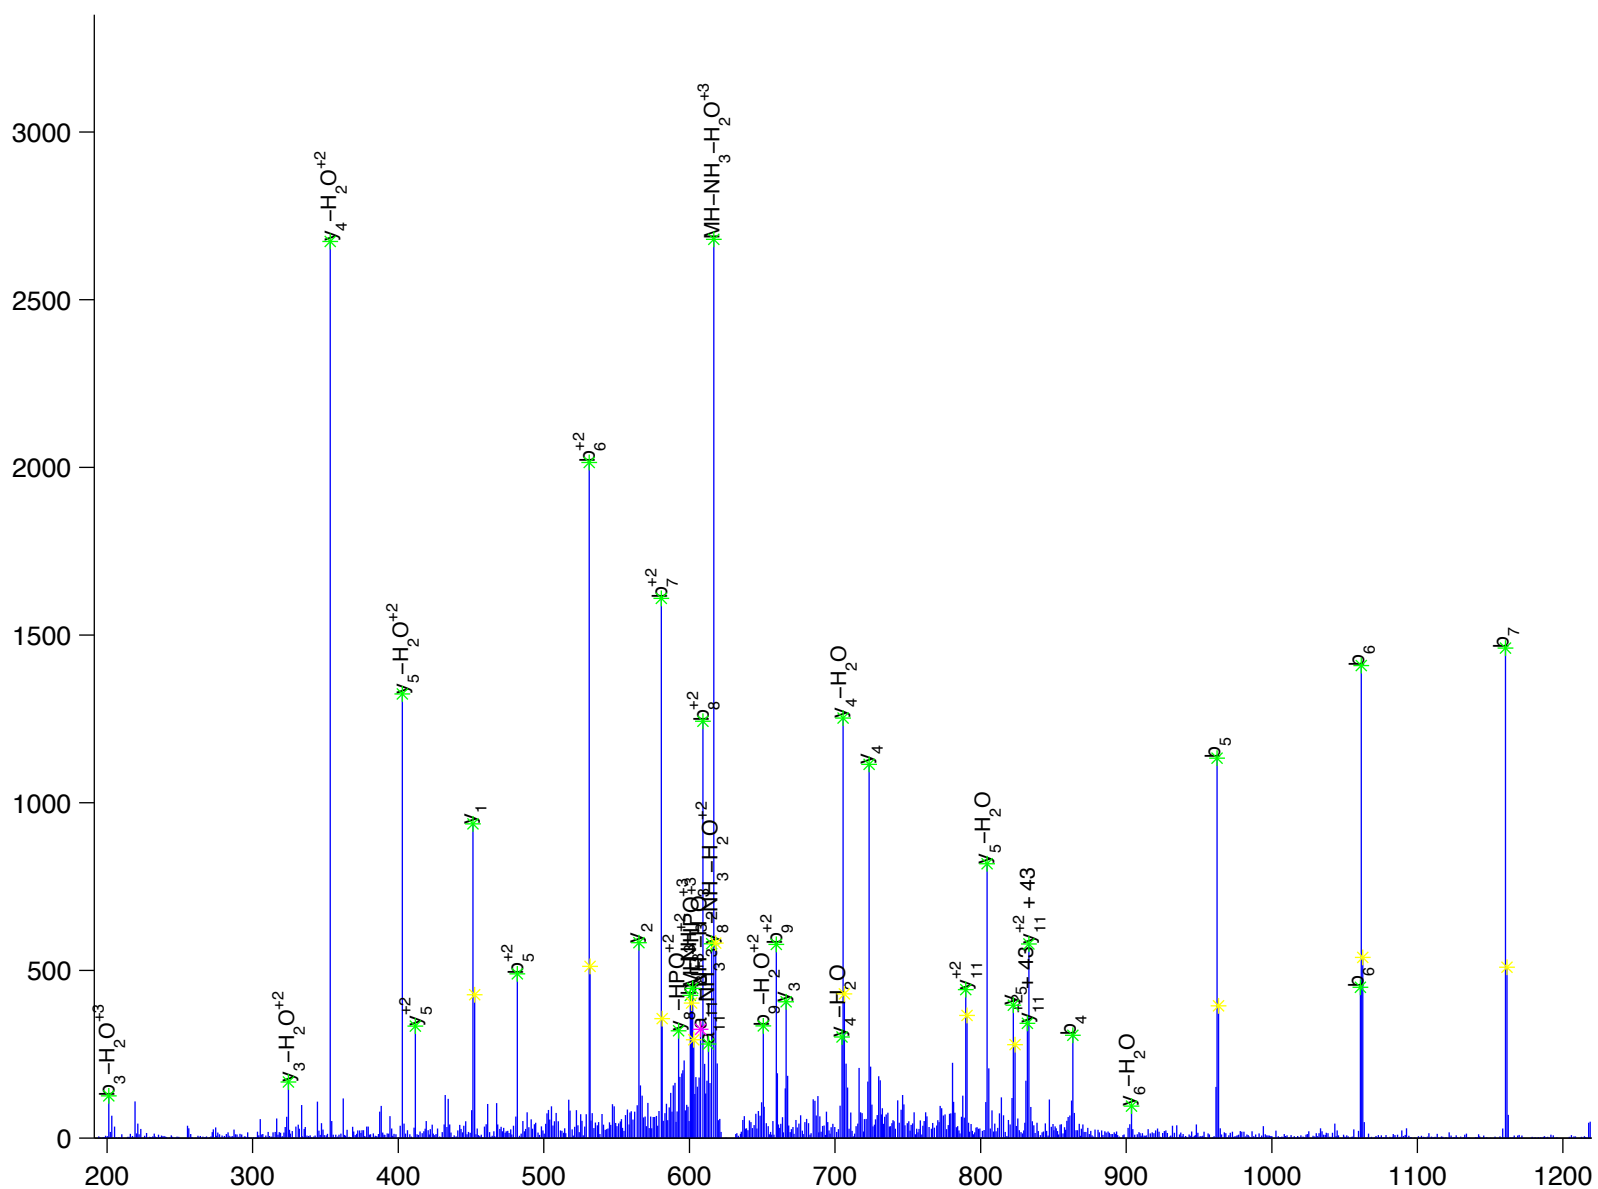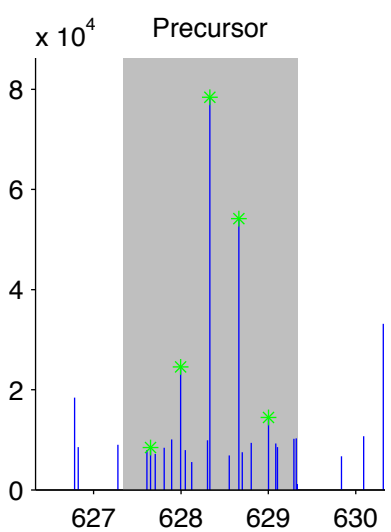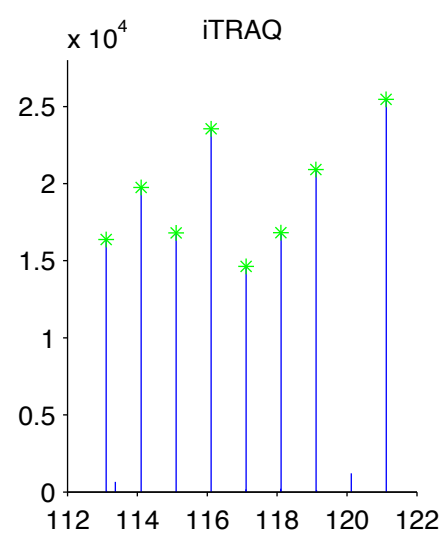

Q[VV]D[S]A[y]E[V]I]K

lactate dehydrogenase A

Charge State: +3

Scan Number: 7447

File Name: 090807ptp1blivers\_M\_HFD\_basal.raw

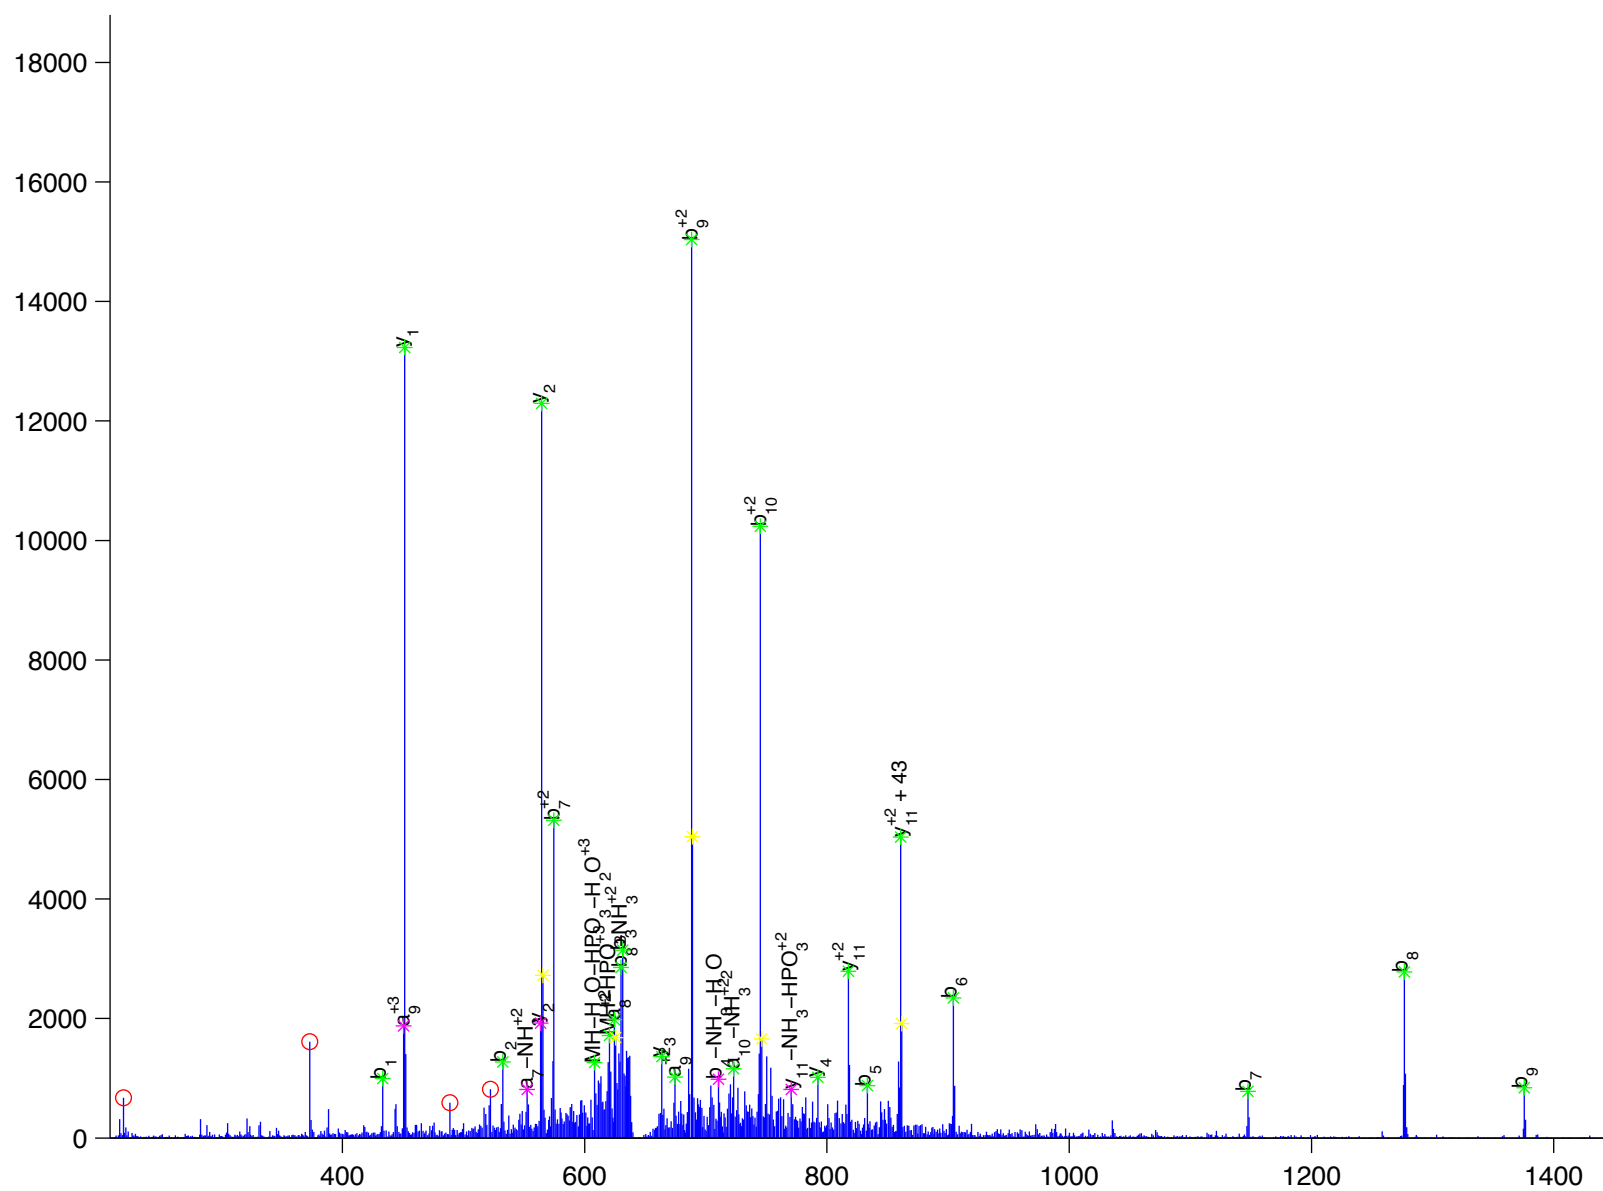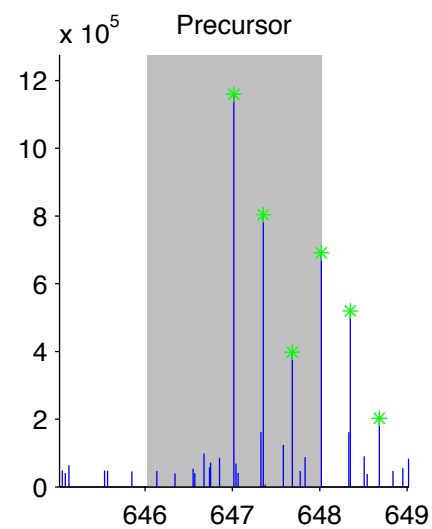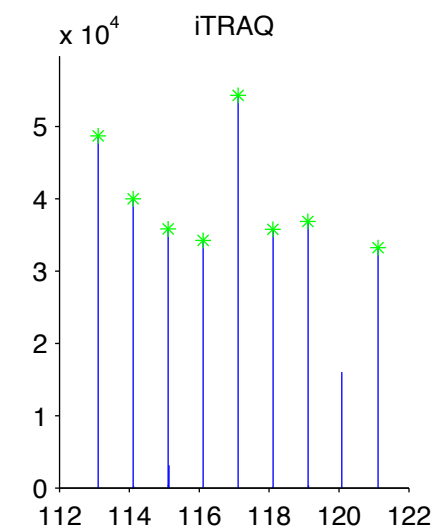

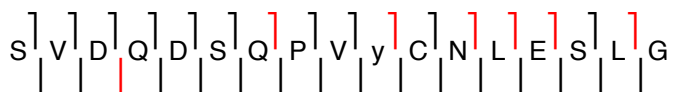

leucine rich repeat containing 25

Charge State: +3

Scan Number: 4951

File Name: 100905ptp1blivers\_ncHFD\_basal.raw

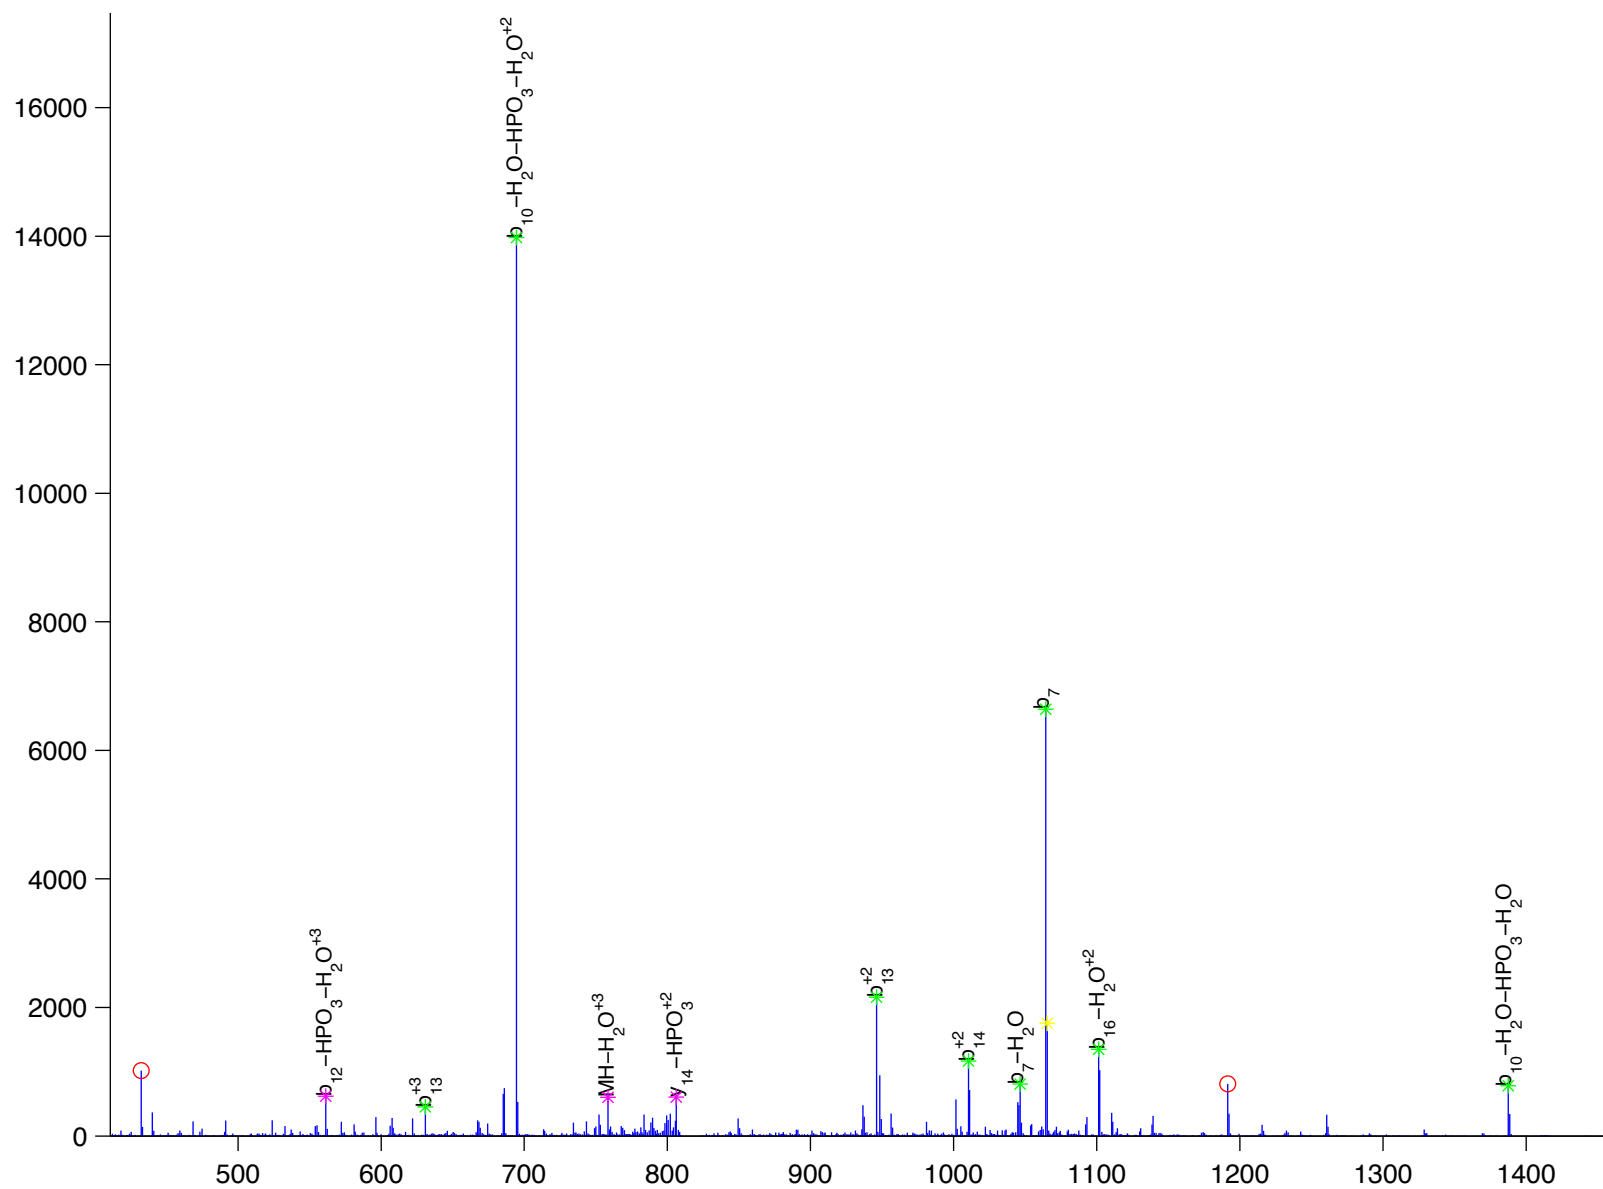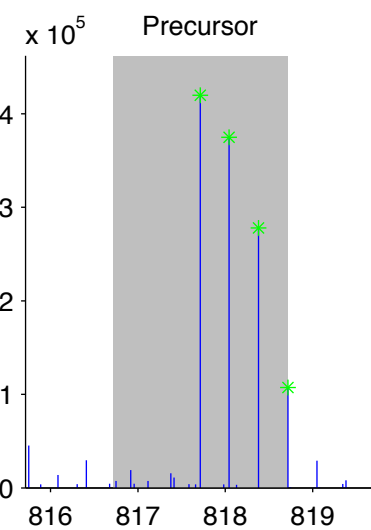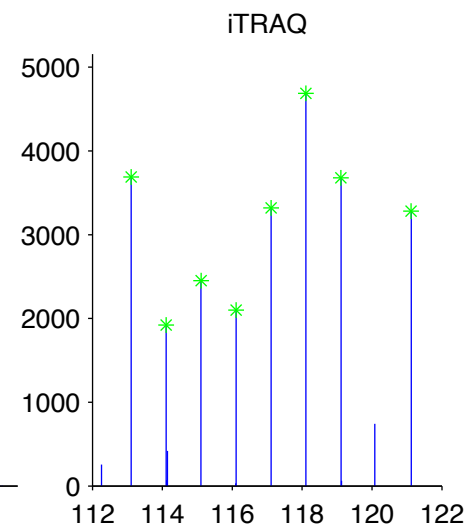

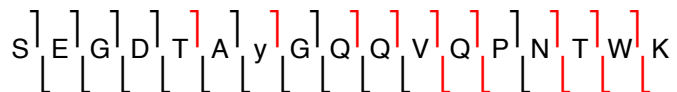

LIM domain containing preferred translocation partner in lipoma

Charge State: +3

Scan Number: 5758

File Name: 090807ptp1blivers\_M\_HFD\_basal.raw

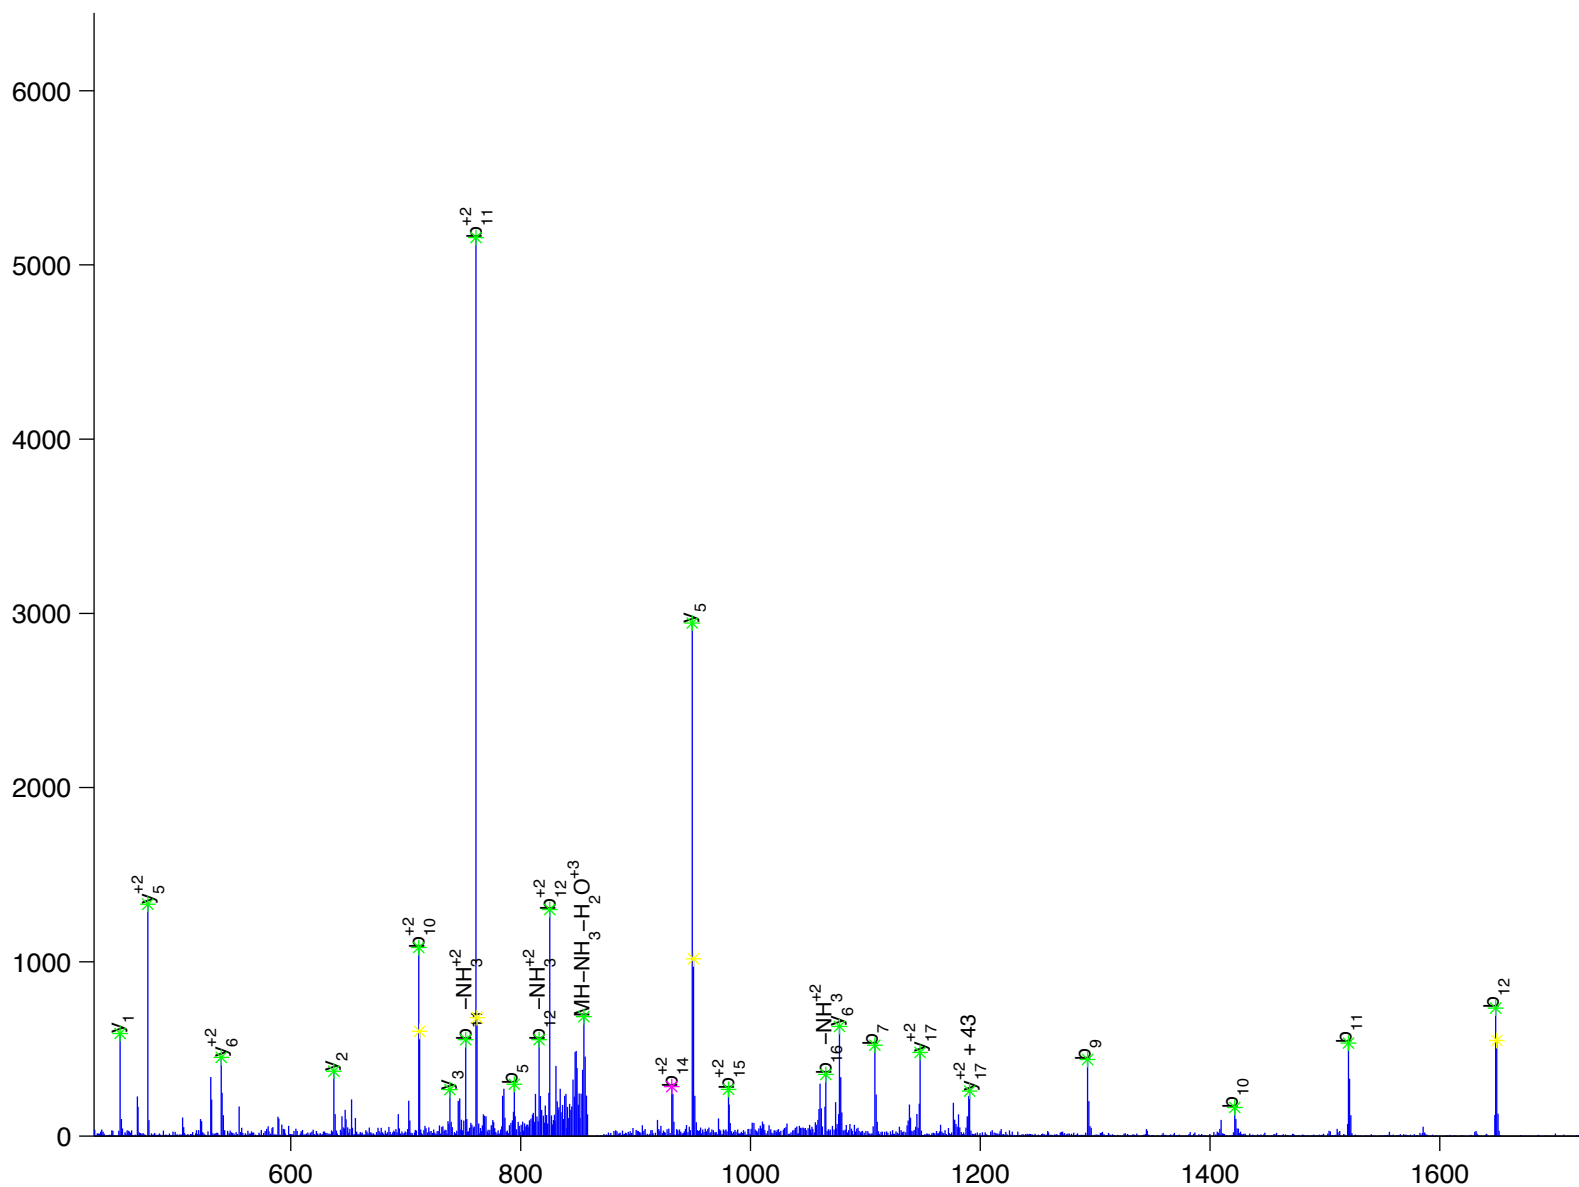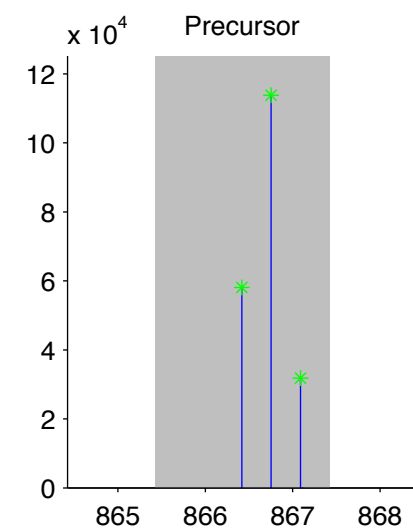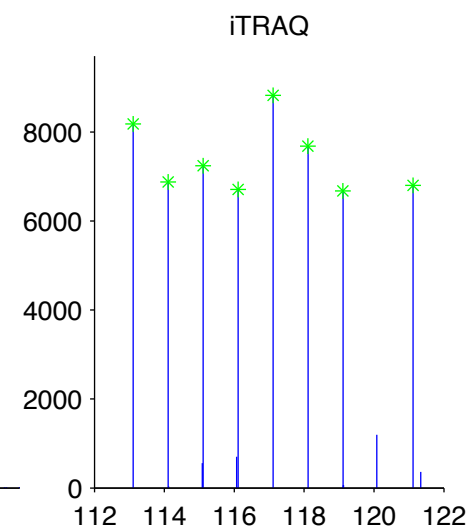

G[V]N[I]G[G]A[G]S[Y]I[y]E[K]P[Q]T[E]A[P]Q[V]T[G]P[I]E[V]P[V]V[R]

LIM only protein HLP

Charge State: +5

Scan Number: 8959

File Name: 090807ptp1blivers\_M\_HFD\_basal.raw

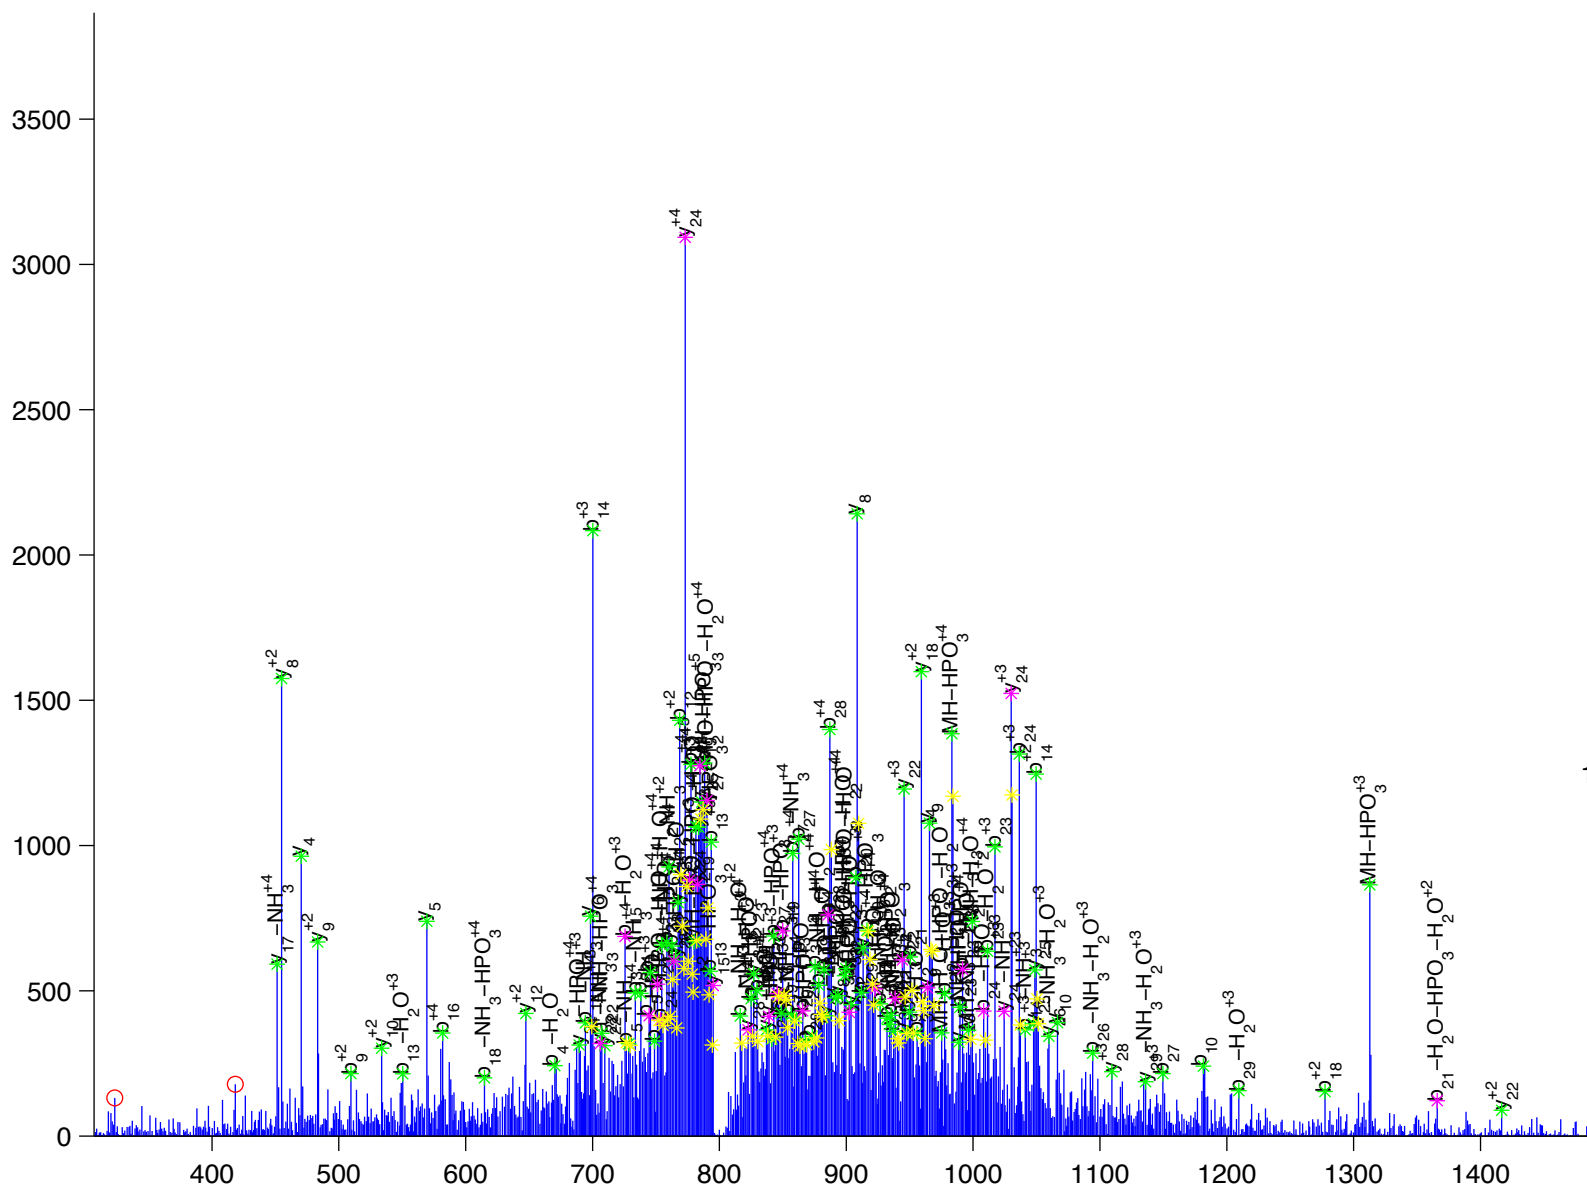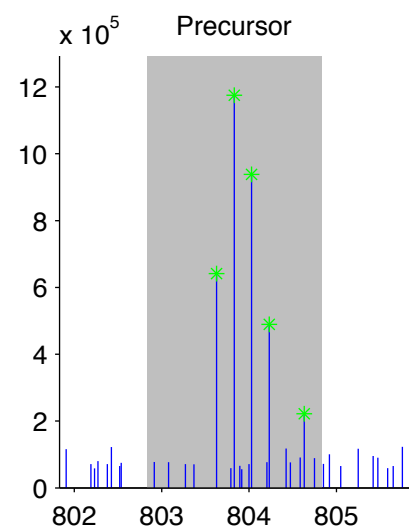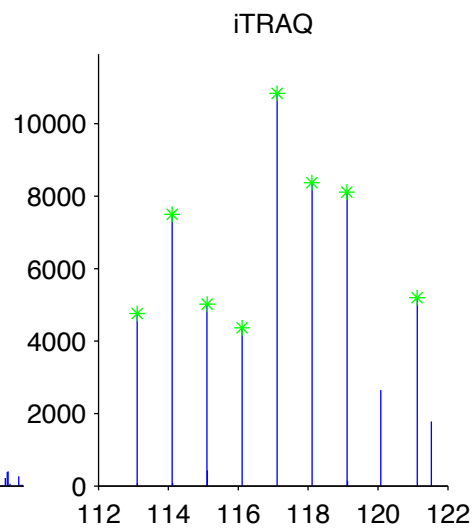

V[D]T[D]G[N]G[y]I[S]C[N]E[L]N[D]L[F]K

lymphocyte cytosolic protein 1

Charge State: +3

Scan Number: 6257

File Name: 100905ptp1blivers\_ncHFD\_basal.raw

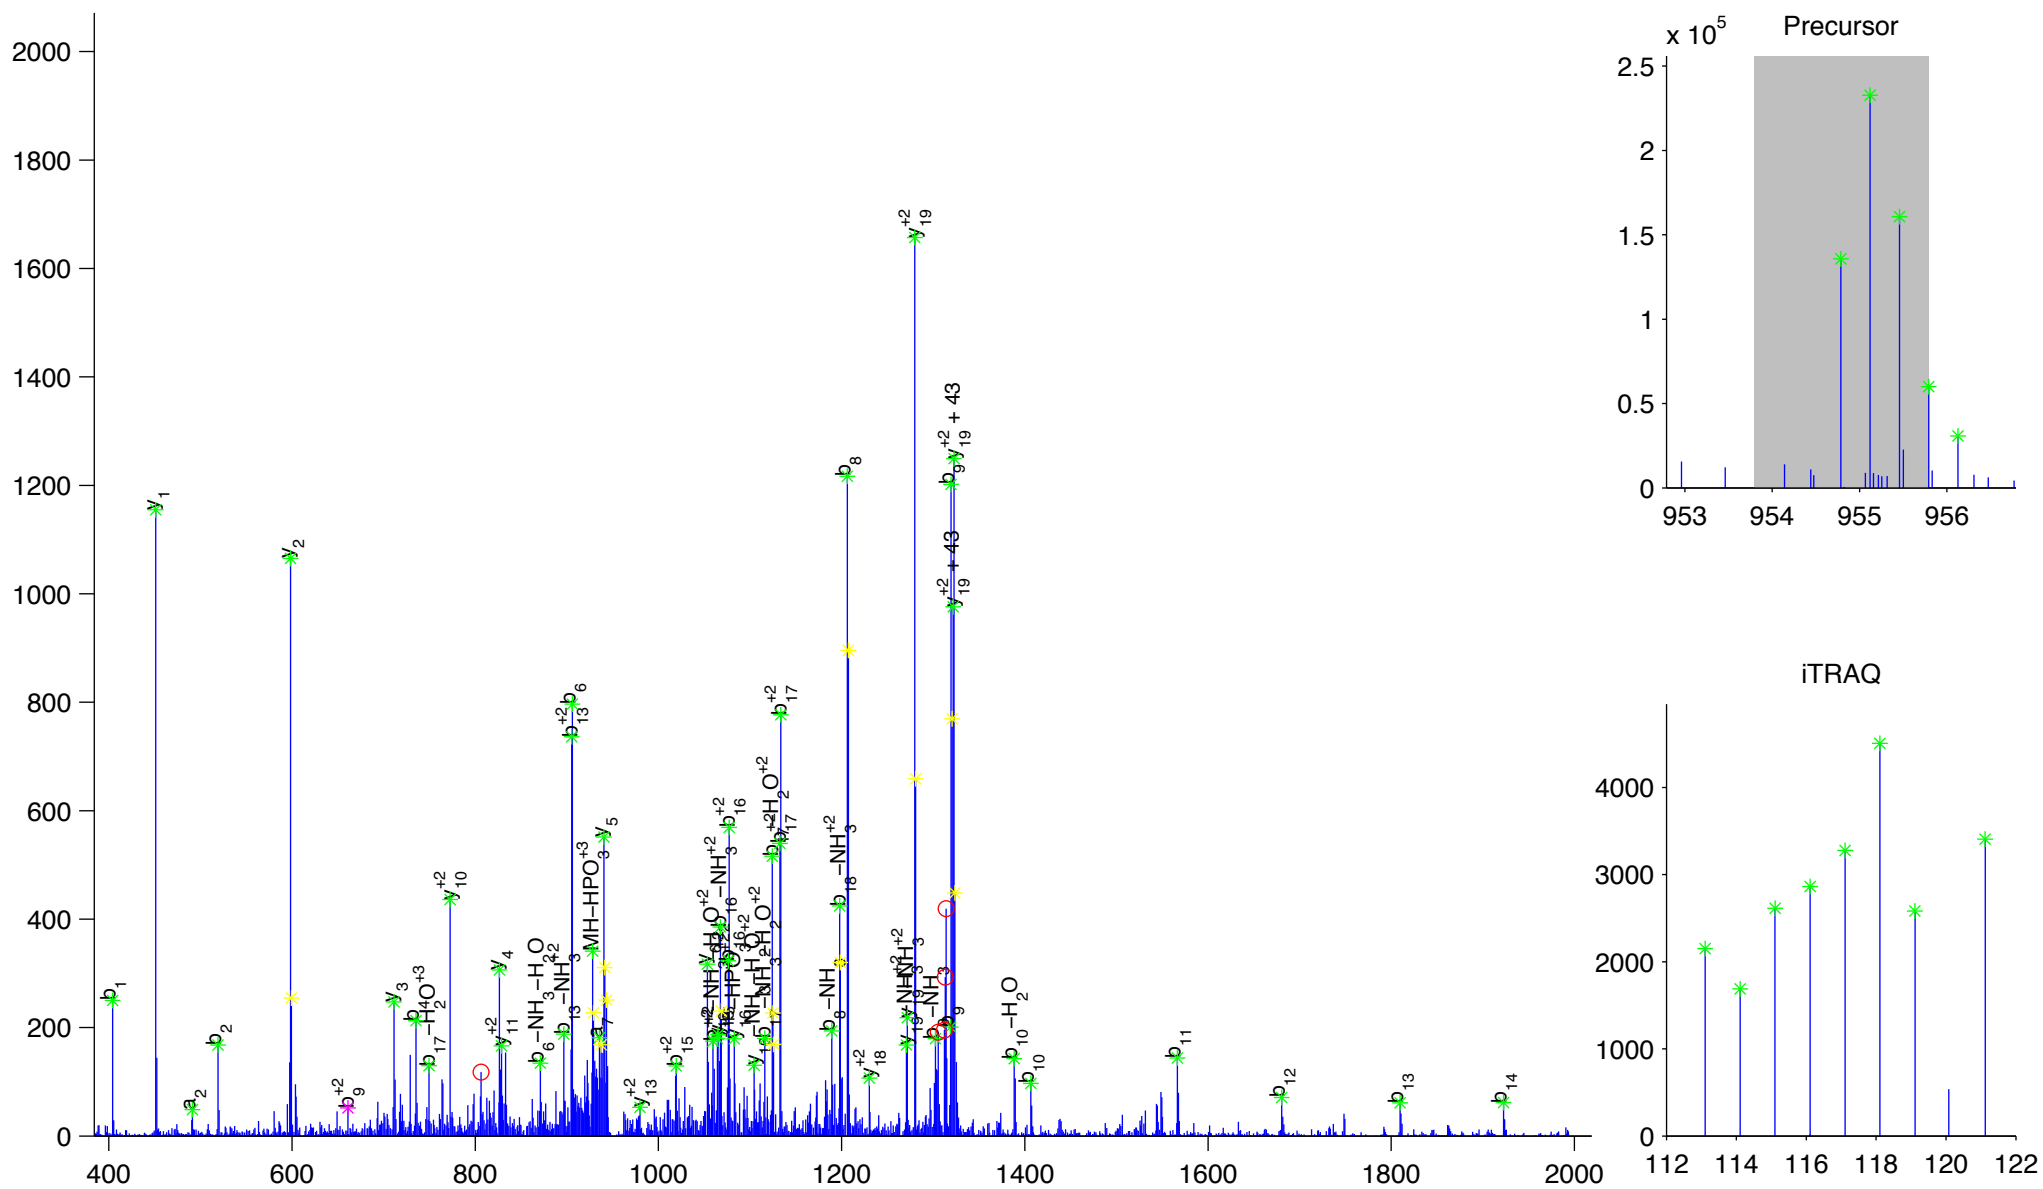

E[V]G[V]y[E]A[L]K[D]D[S]W[L]K

malate dehydrogenase 1, NAD (soluble)

Charge State: +4

Scan Number: 6198

File Name: 100908ptp1blivers\_ncHFD3\_basal.raw

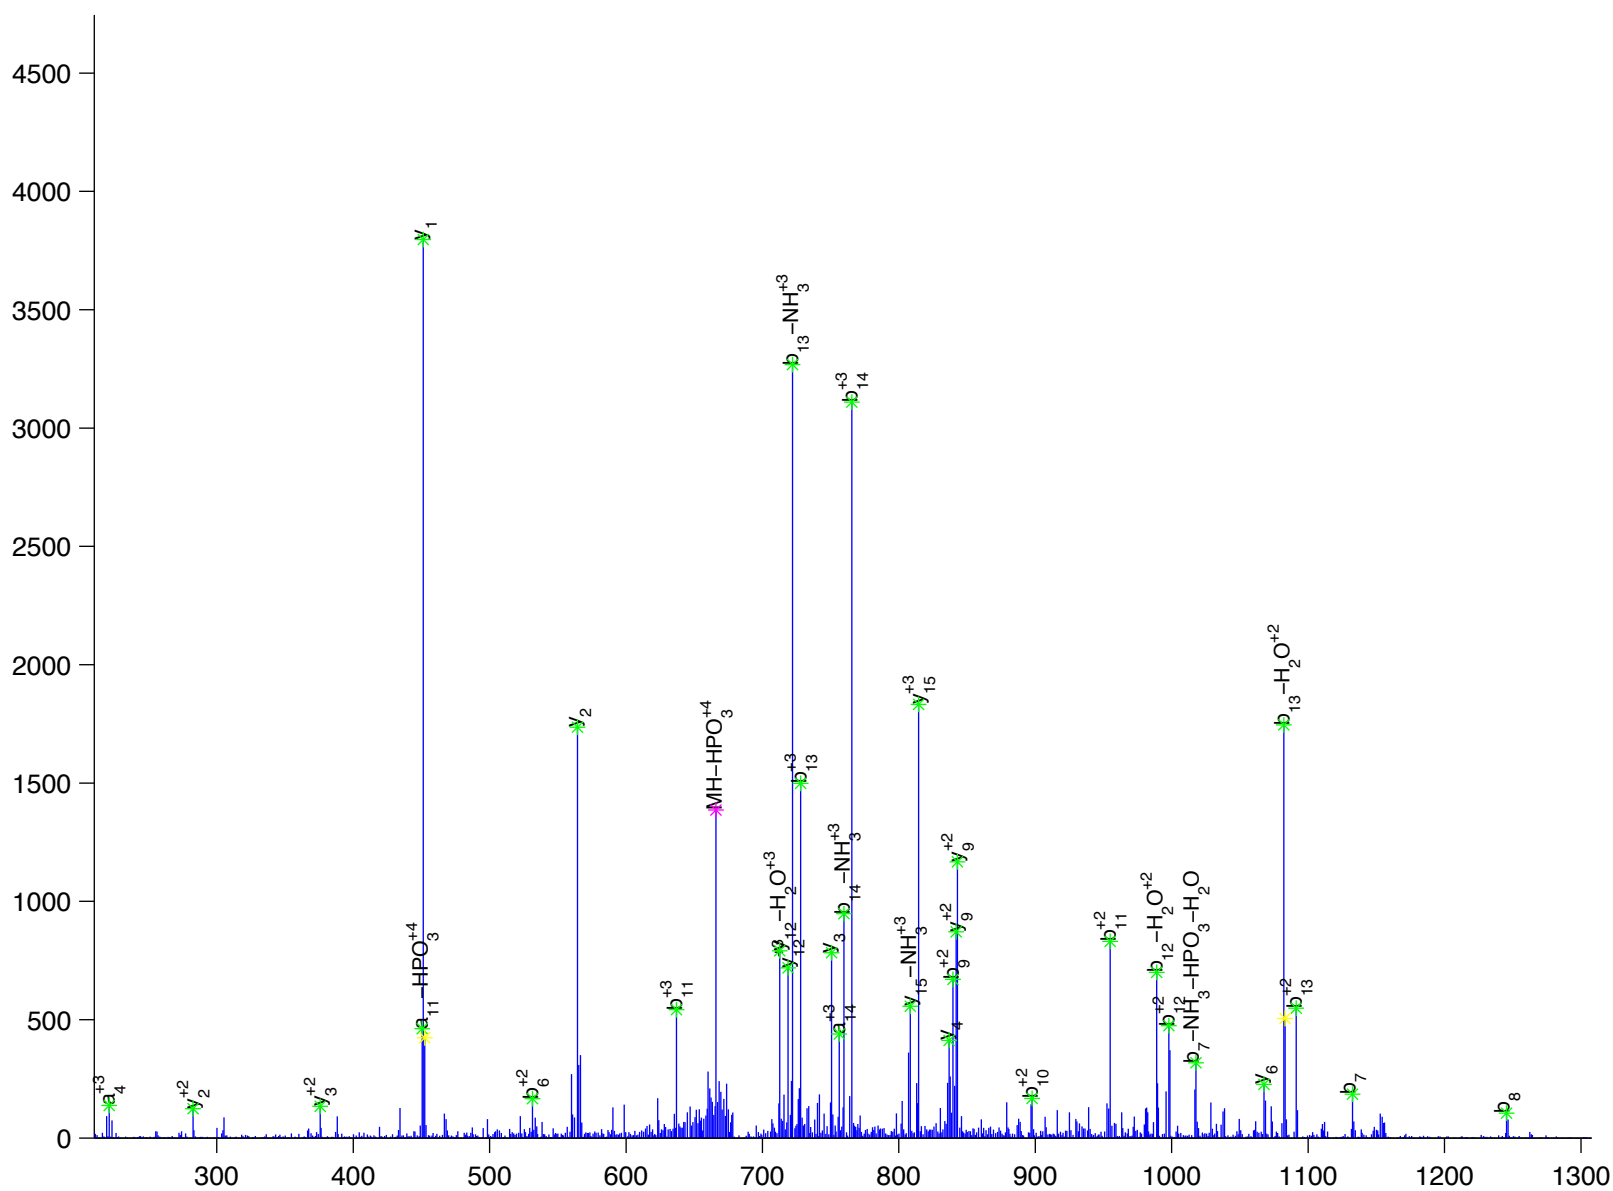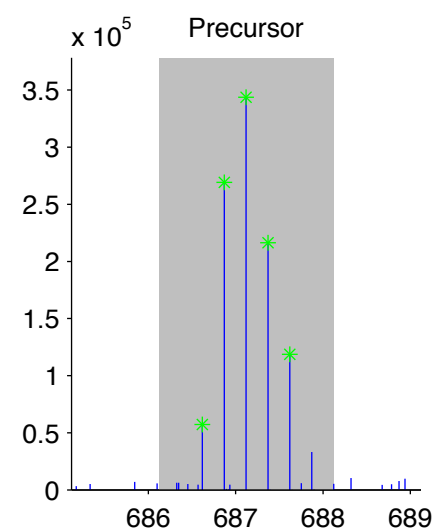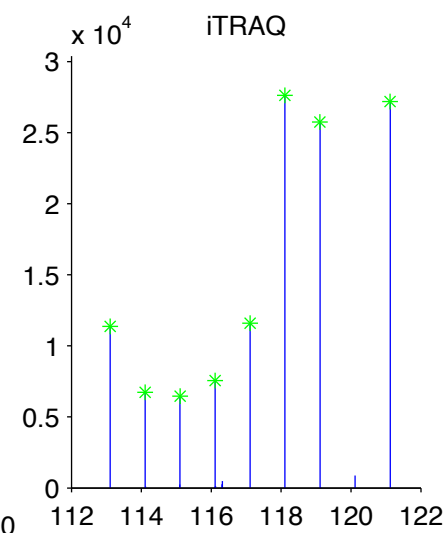

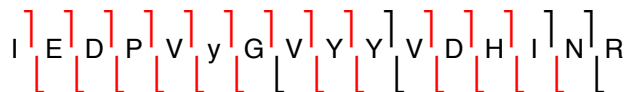

membrane associated guanylate kinase, WW and PDZ domain containing 1 isoform a

Charge State: +3

Scan Number: 6080

File Name: 100908ptp1blivers\_ncHFD3\_basal.raw

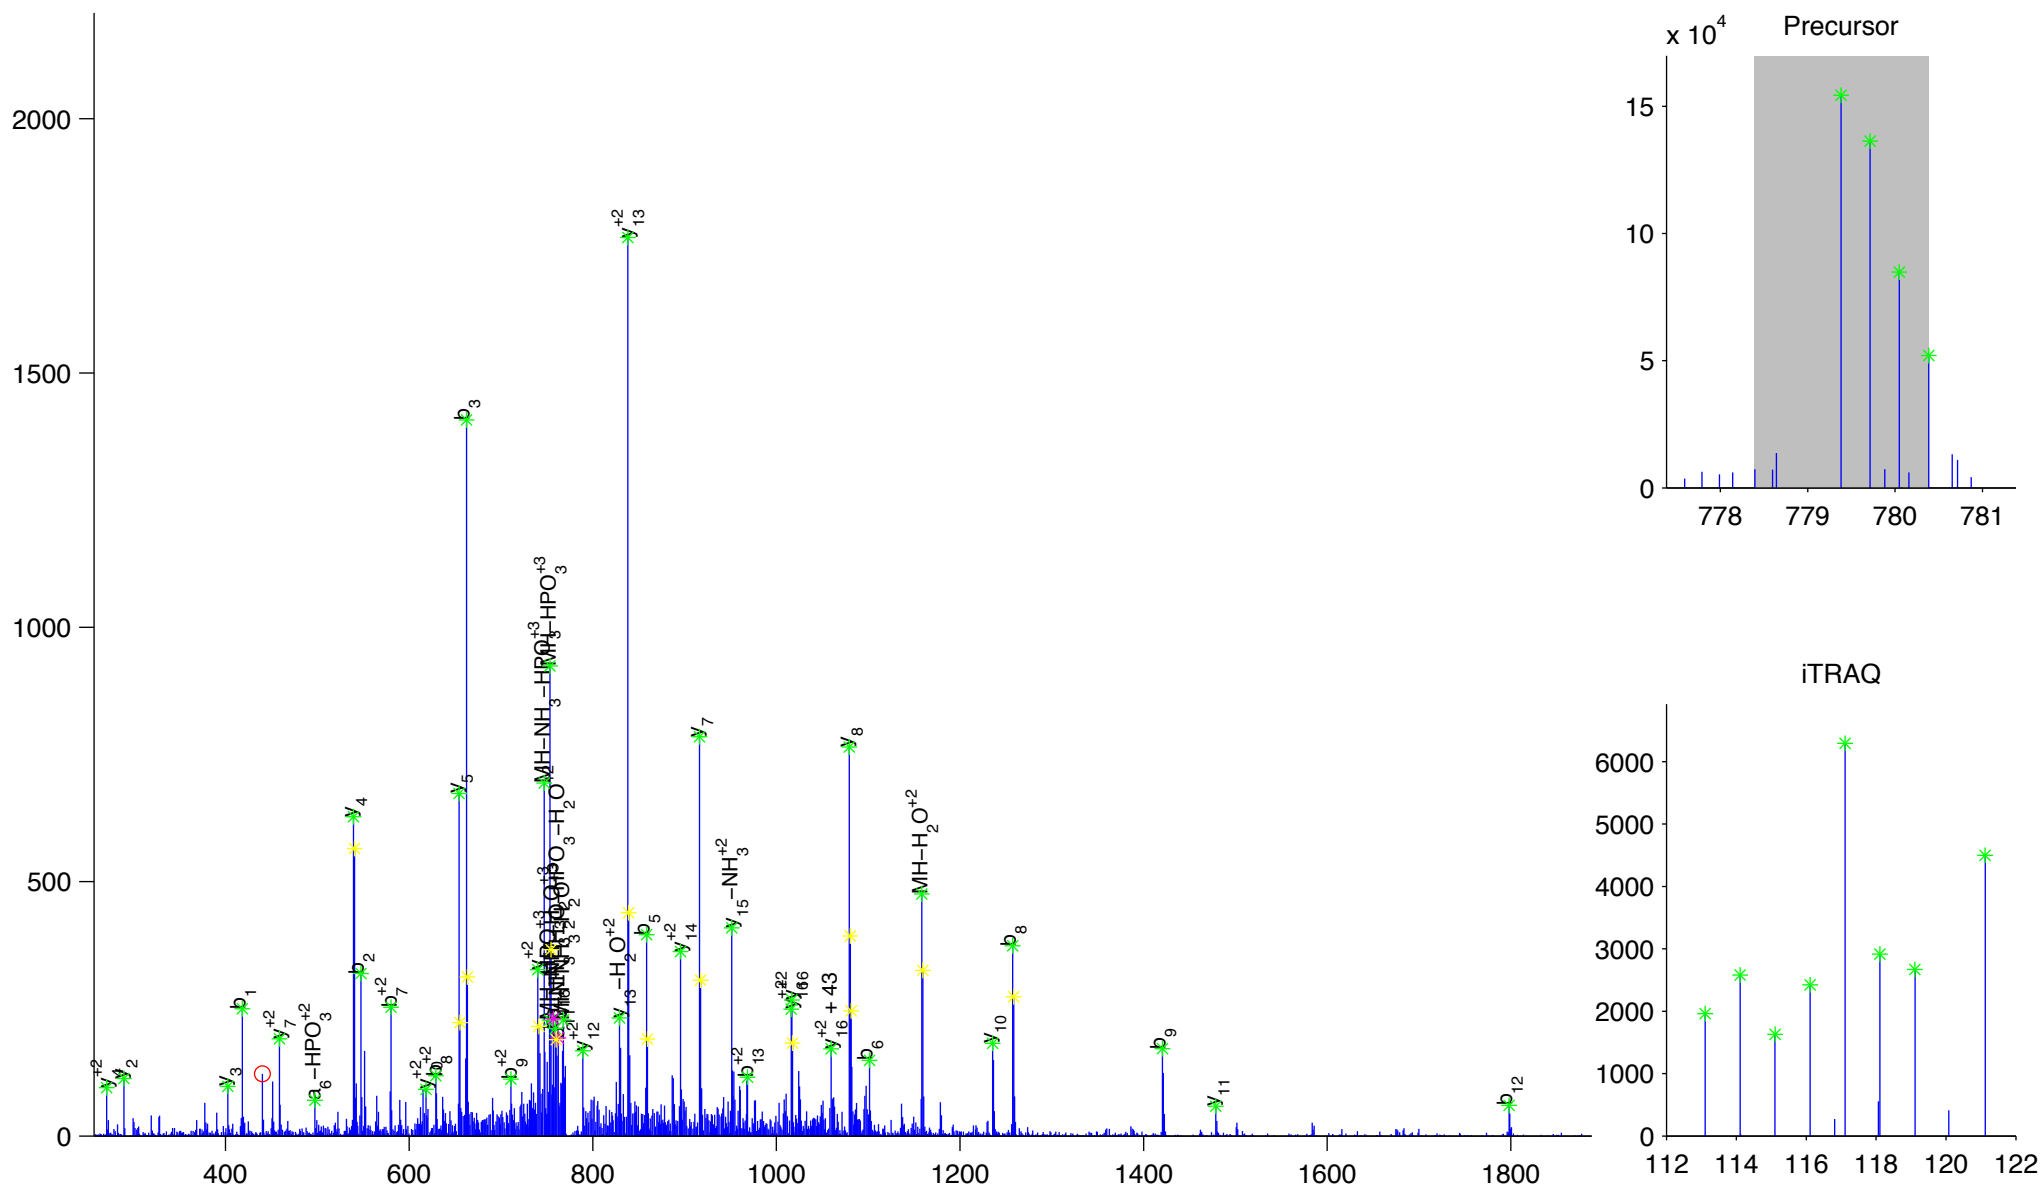



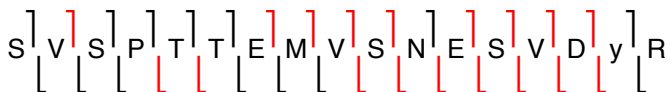

met proto-oncogene

Charge State: +3

Scan Number: 5067

File Name: 091130ptp1blivers\_hfd\_basal2.raw

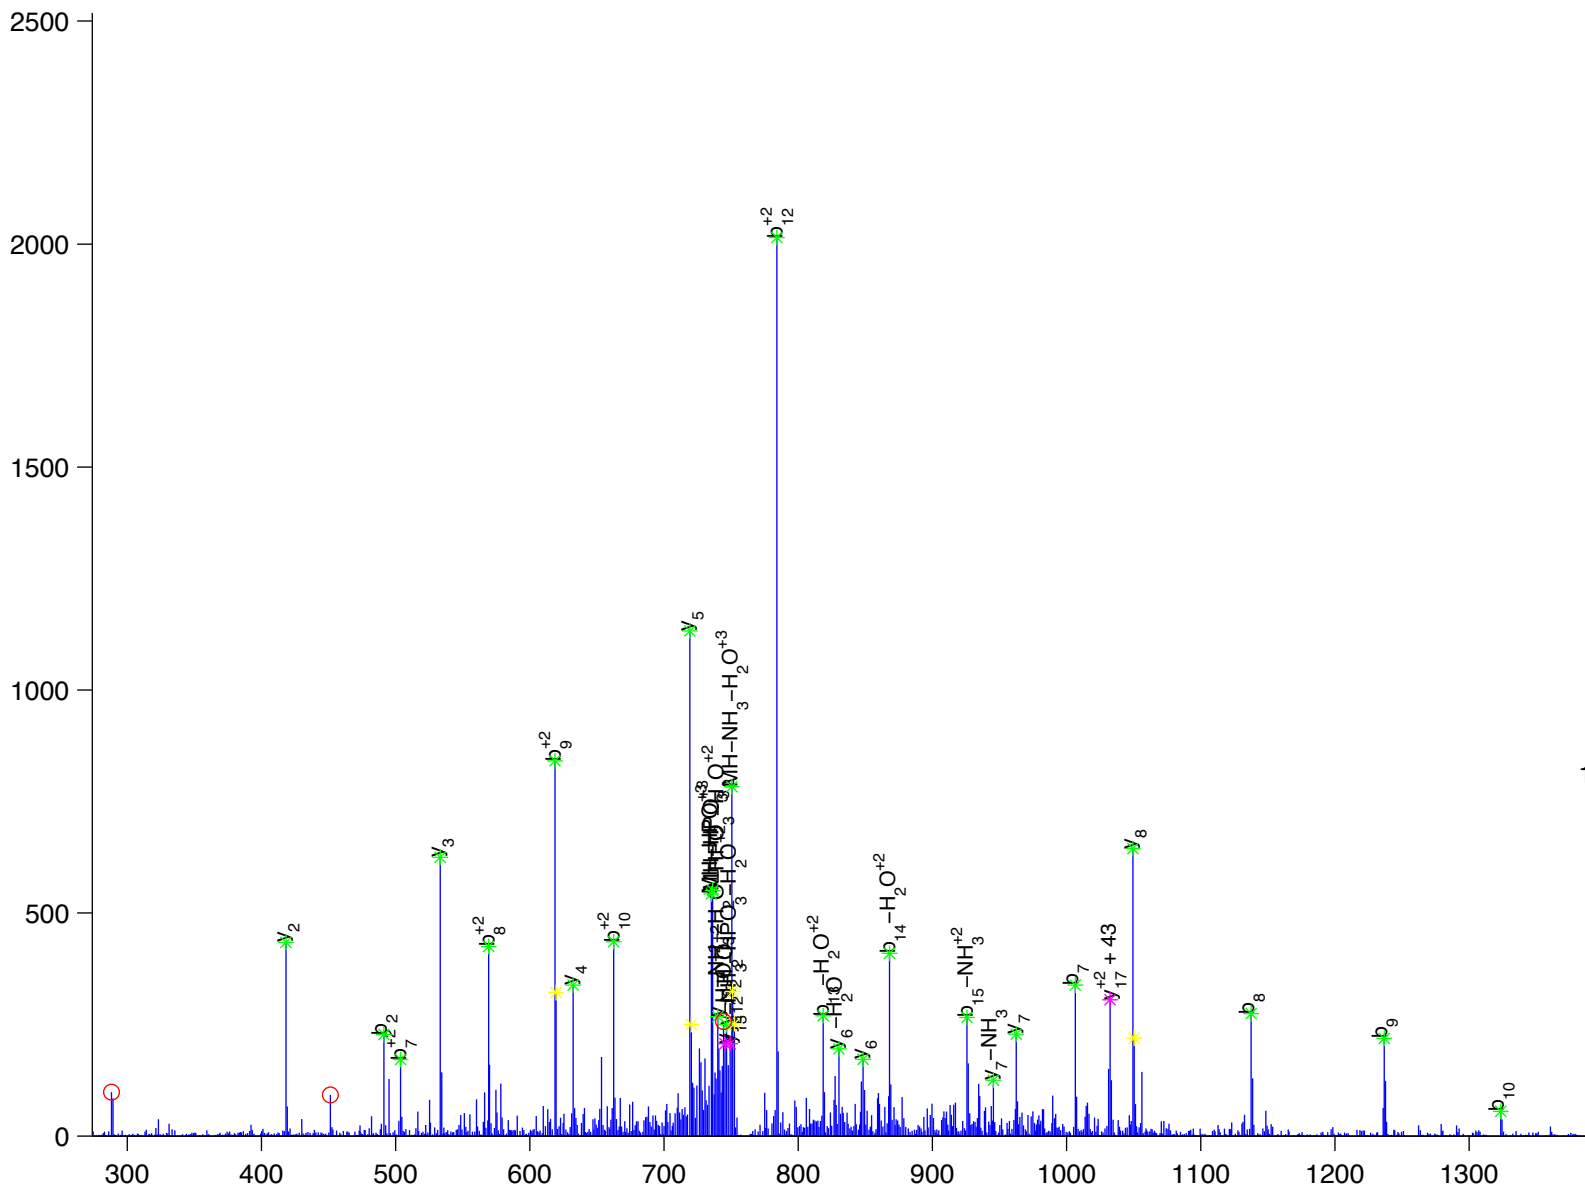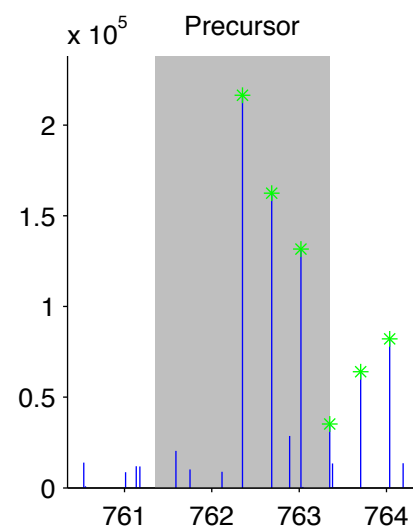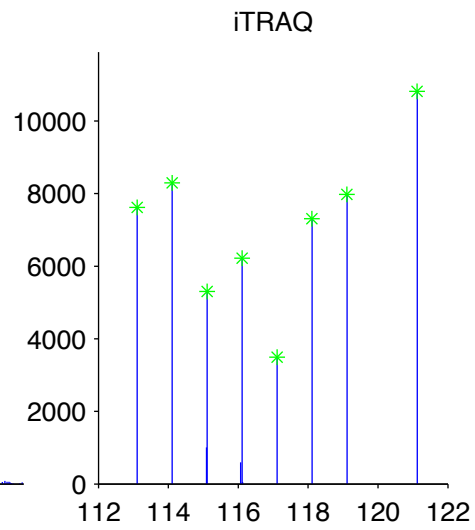

F V D L y G A Q K

mitochondrial trifunctional protein, alpha subunit

Charge State: +3

Scan Number: 6234

File Name: 091130ptp1blivers\_hfd\_basal2.raw

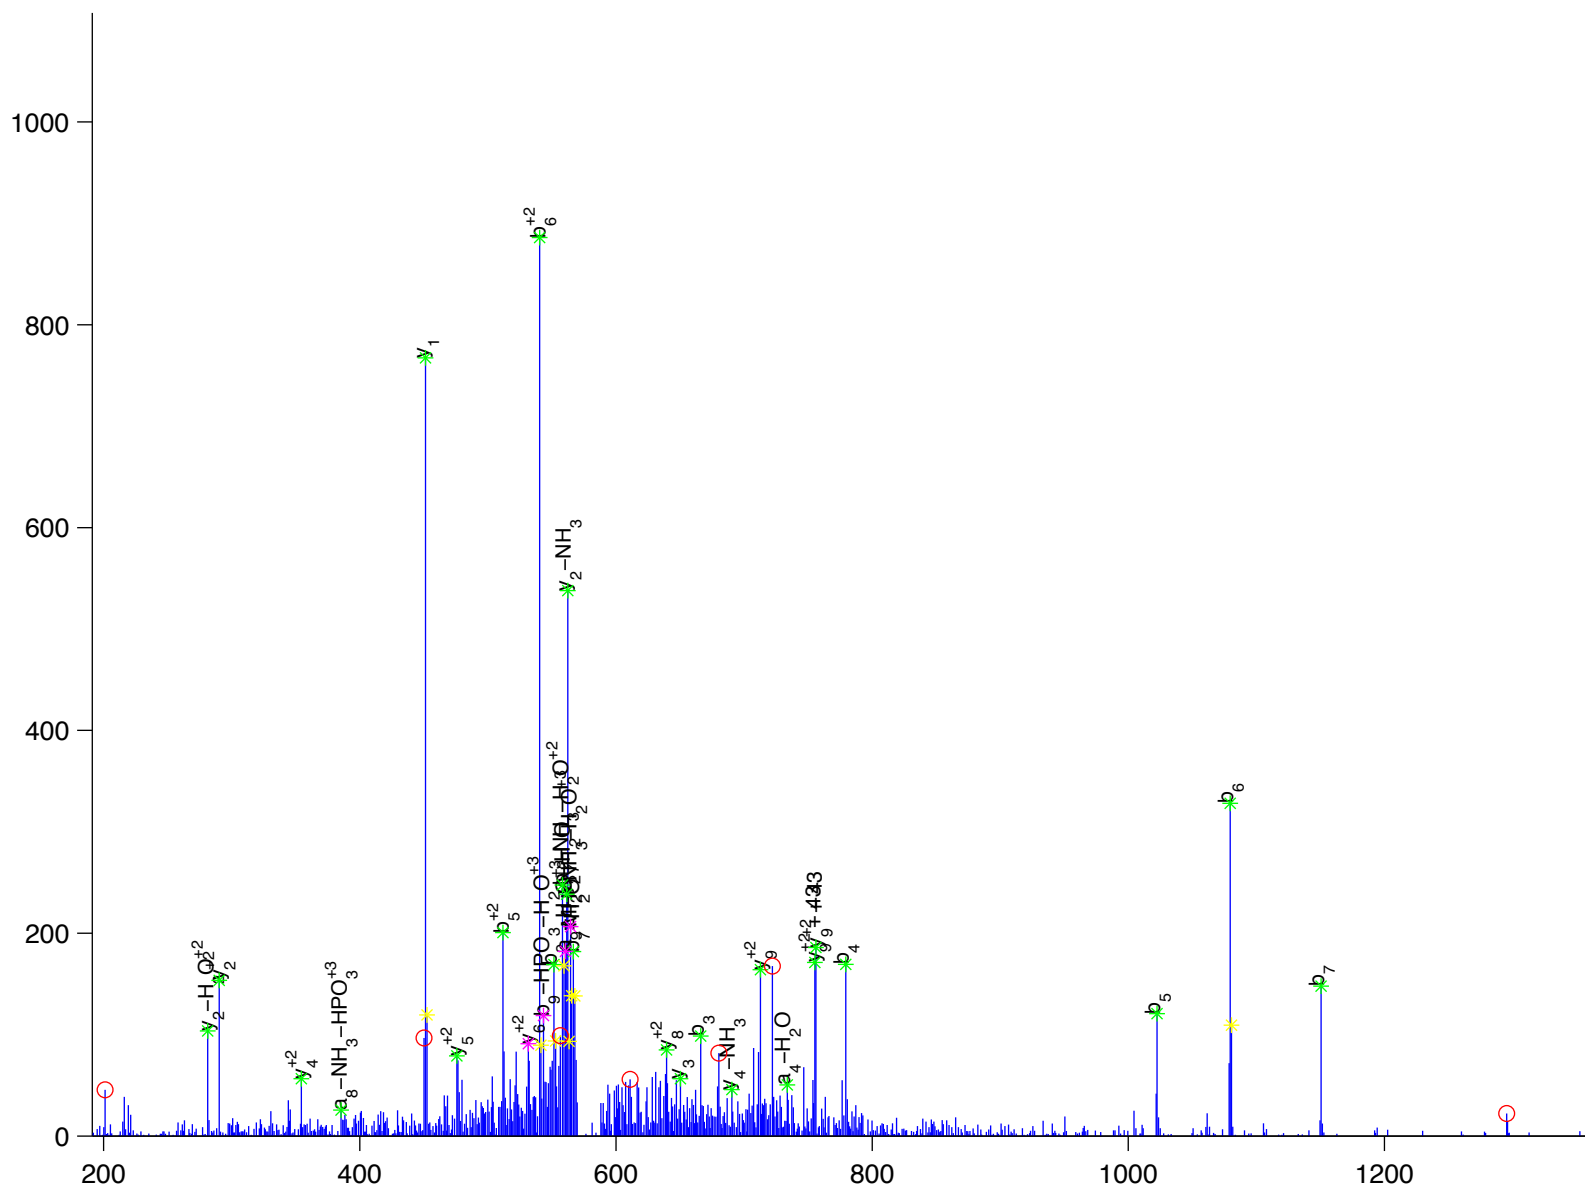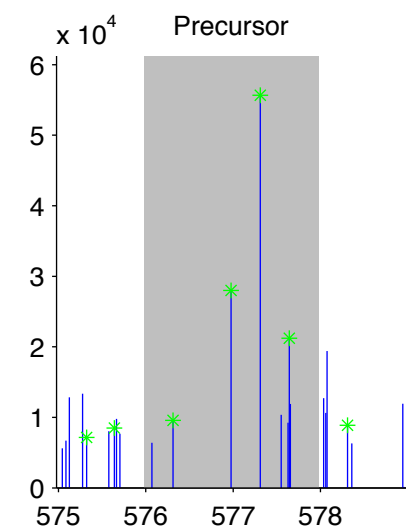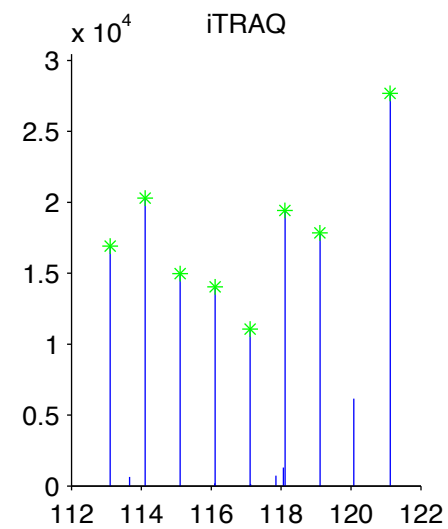

V[A][D][P][D][H][D][H][T][G][F][L][t][E][Y][V][A][T]R

mitogen activated protein kinase 1

Charge State: +3

Scan Number: 4993

File Name: 090806ptp1blivers\_M\_NC2.raw

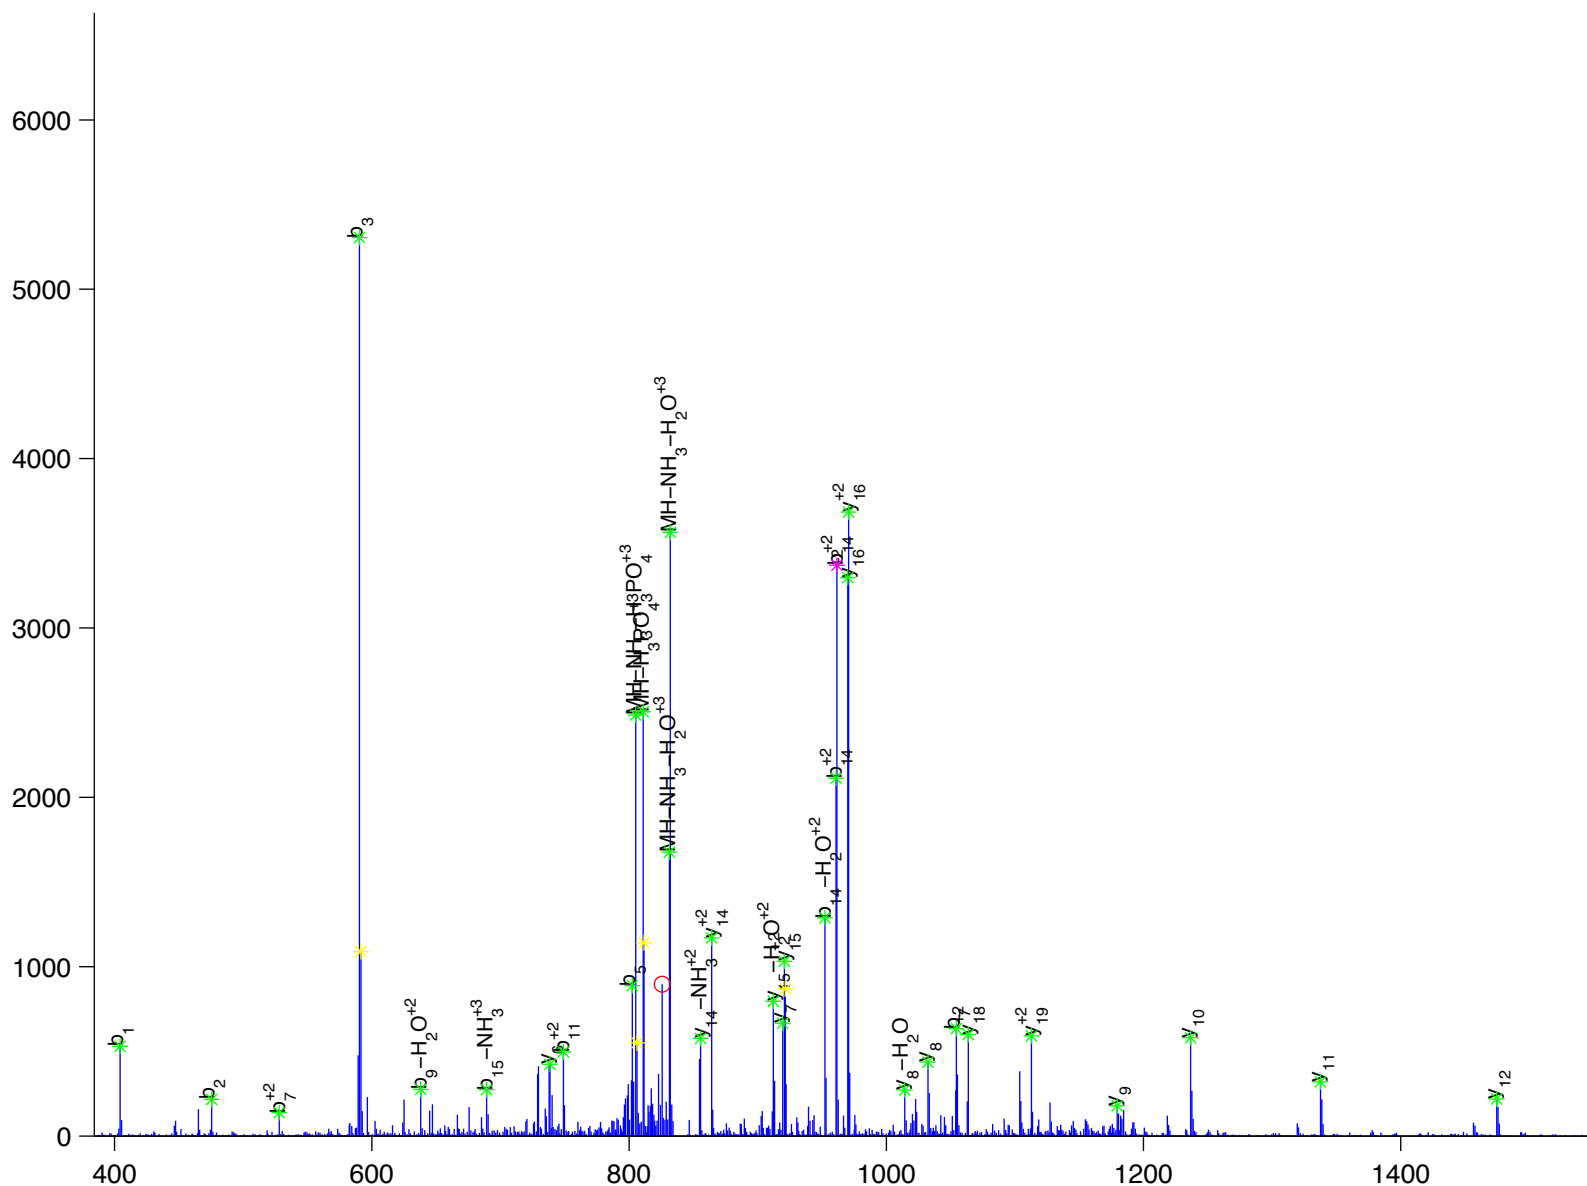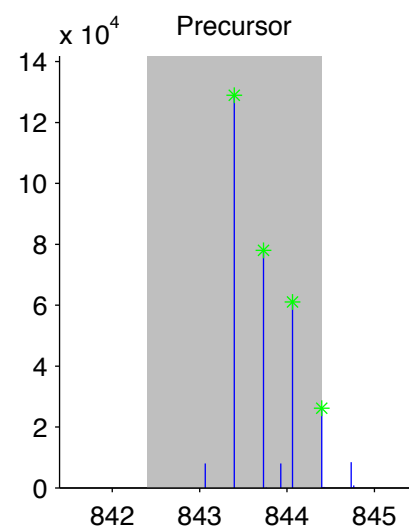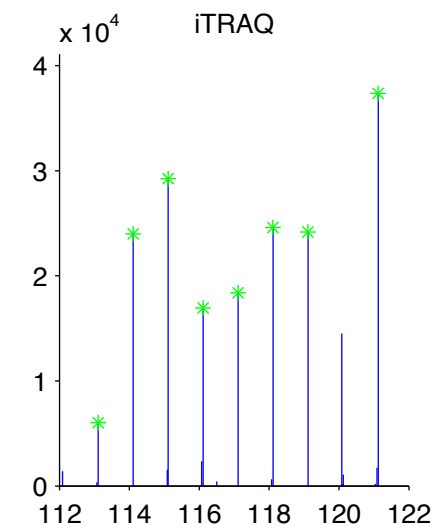

V[A][D][P][D][H][D][H][T][G][F][L][T][E]Y[V][A][t]R

mitogen activated protein kinase 1

Charge State: +3

Scan Number: 4993

File Name: 090806ptp1blivers\_M\_NC2.raw

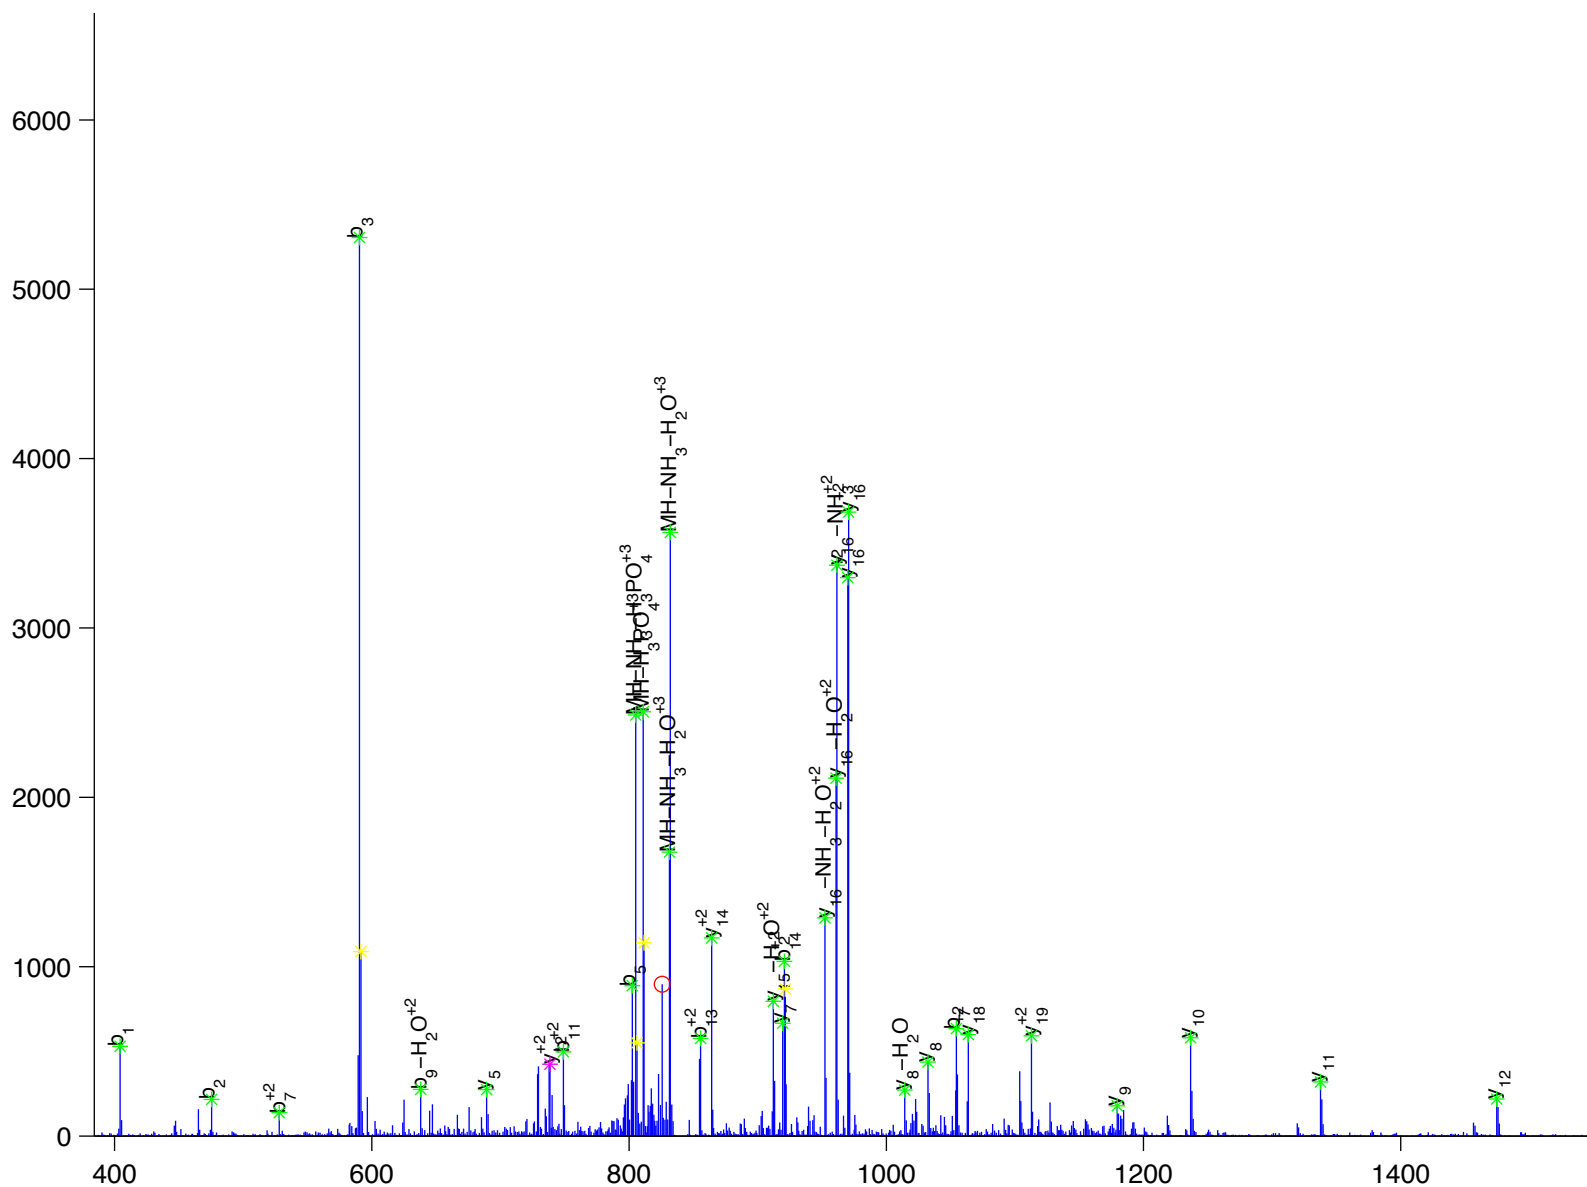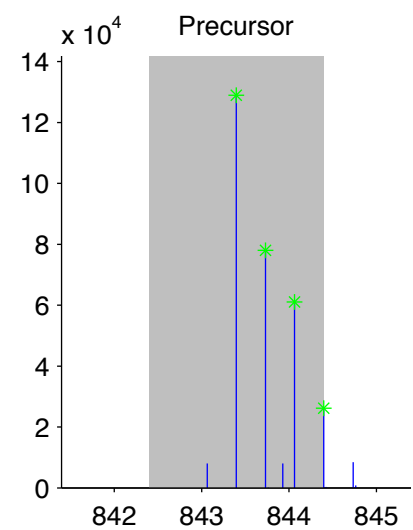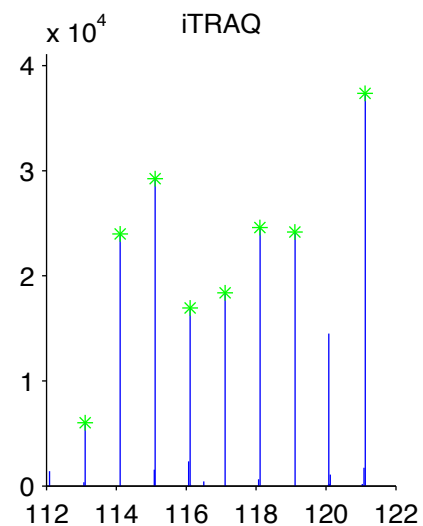

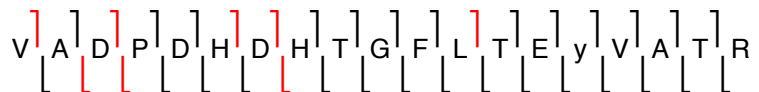

mitogen activated protein kinase 1

Charge State: +3

Scan Number: 5589

File Name: 100908ptp1blivers\_ncHFD3\_basal.raw

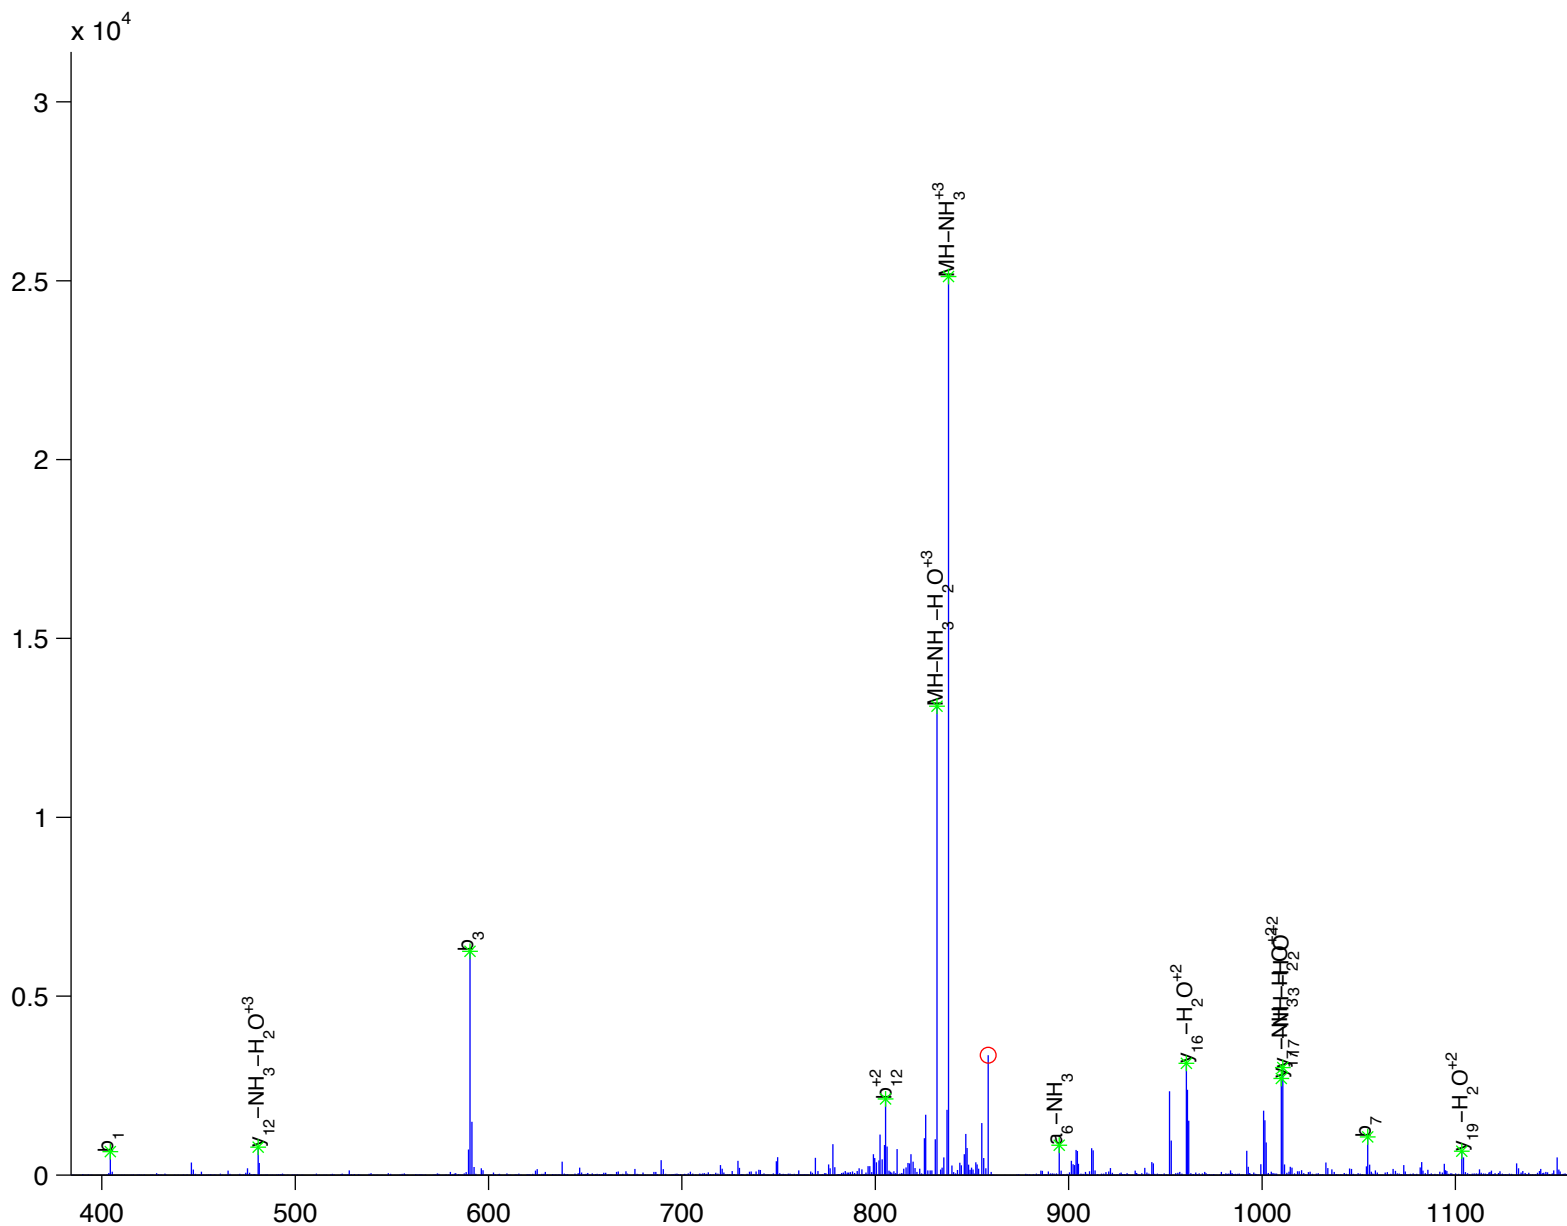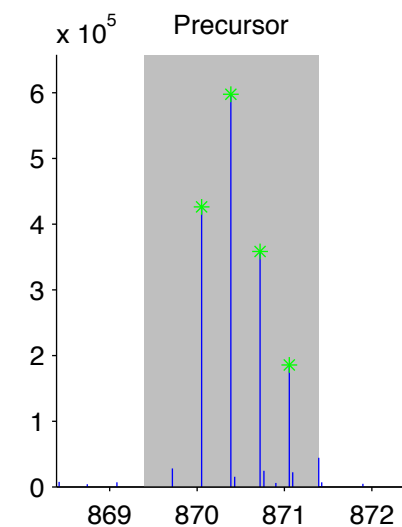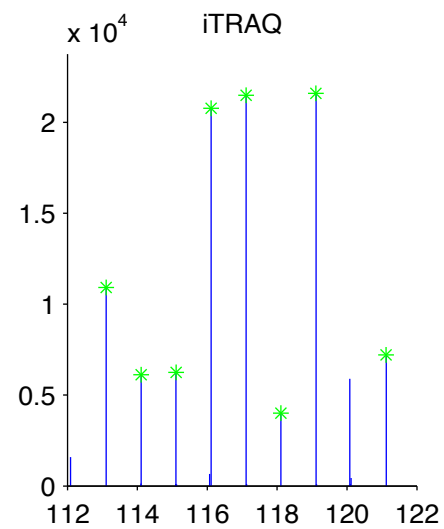

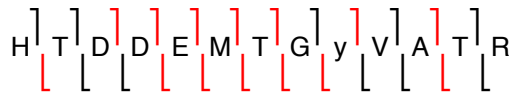

mitogen activated protein kinase 14

Charge State: +3

Scan Number: 3124

File Name: 100905ptp1blivers\_ncHFD\_basal.raw

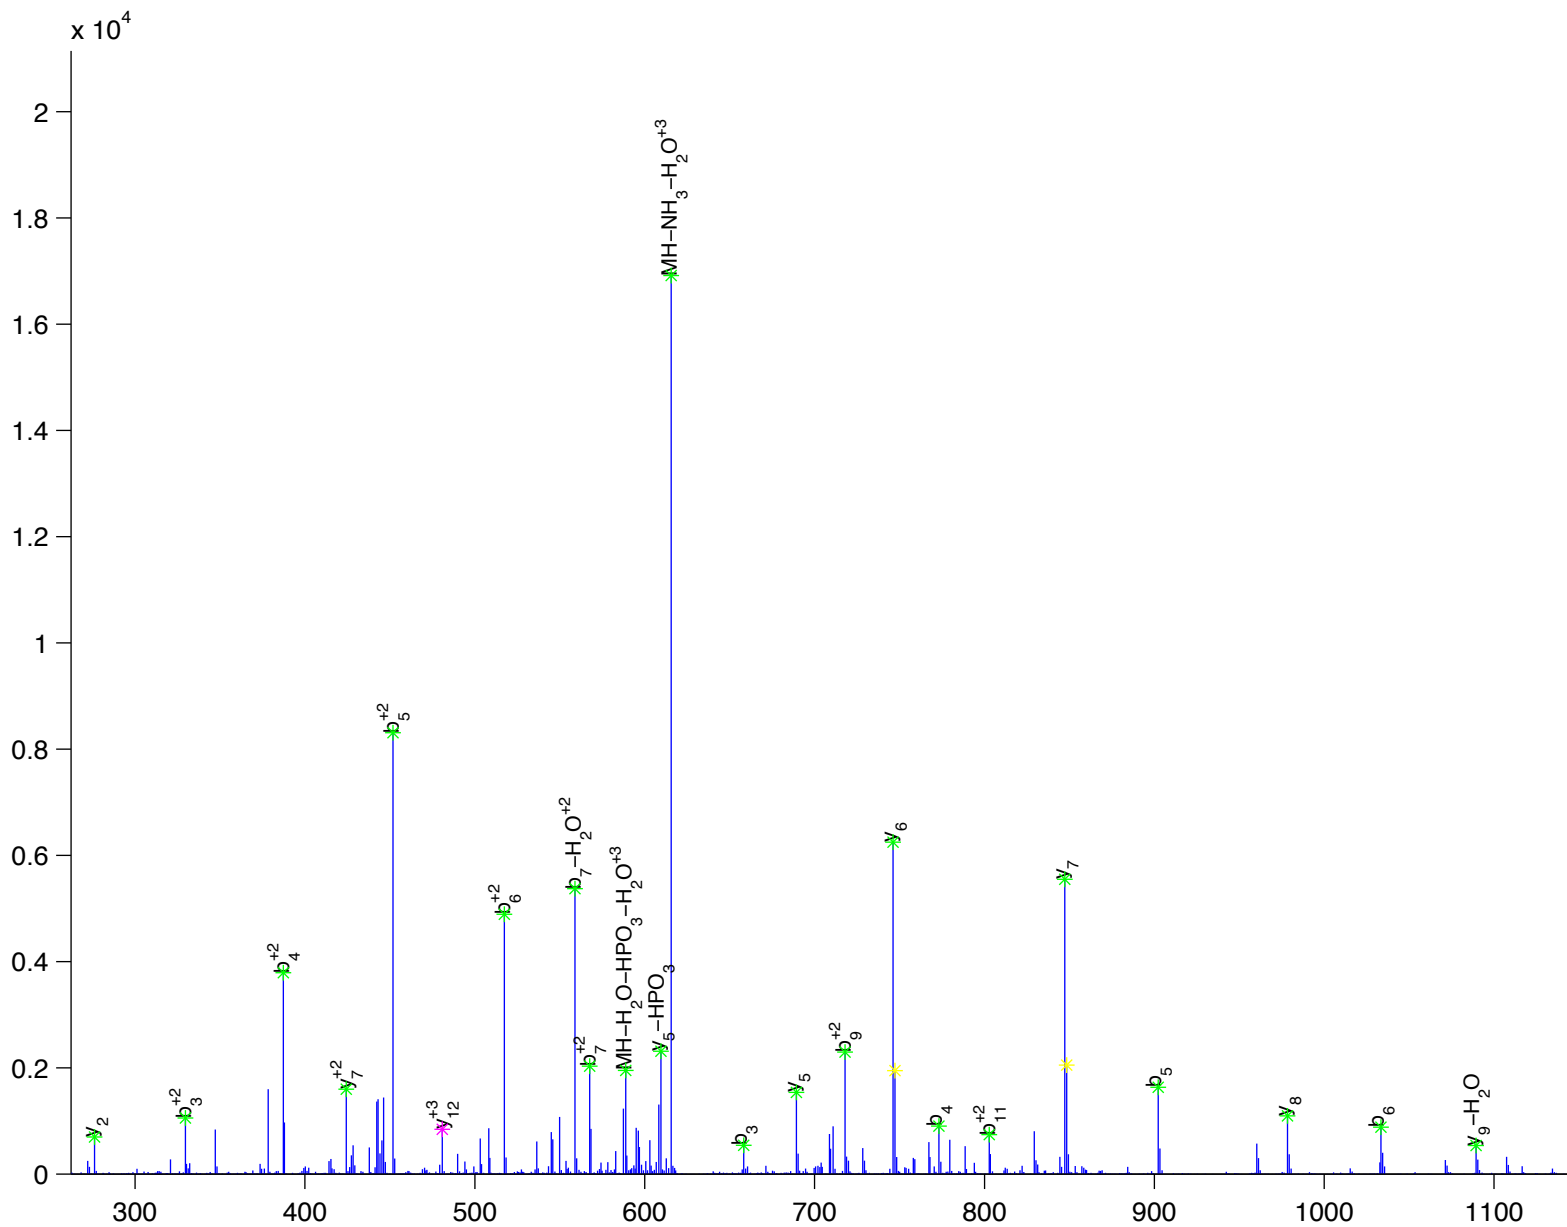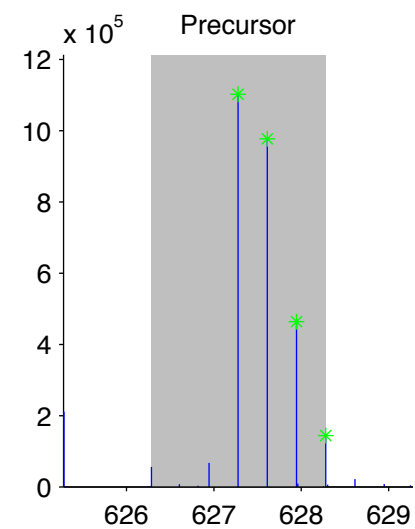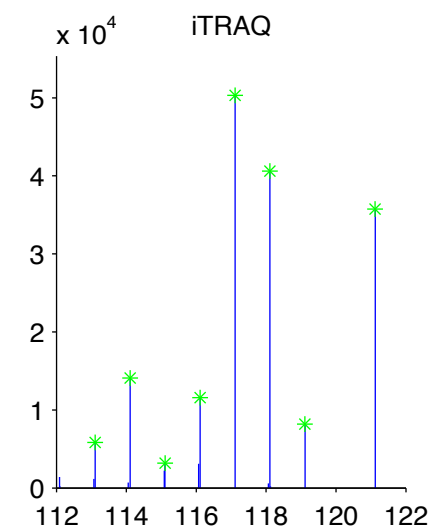

H  
[ T ]  
[ ]  
[ D ]  
[ ]  
[ D ]  
[ ]  
[ E ]  
[ ]  
[ M ]  
[ ]  
t  
[ G ]  
[ ]  
y  
[ V ]  
[ ]  
A  
[ T ]  
[ ]  
R

mitogen activated protein kinase 14

Charge State: +3

Scan Number: 3727

File Name: 090728ptp1blivers\_M\_NC\_ins\_e.raw

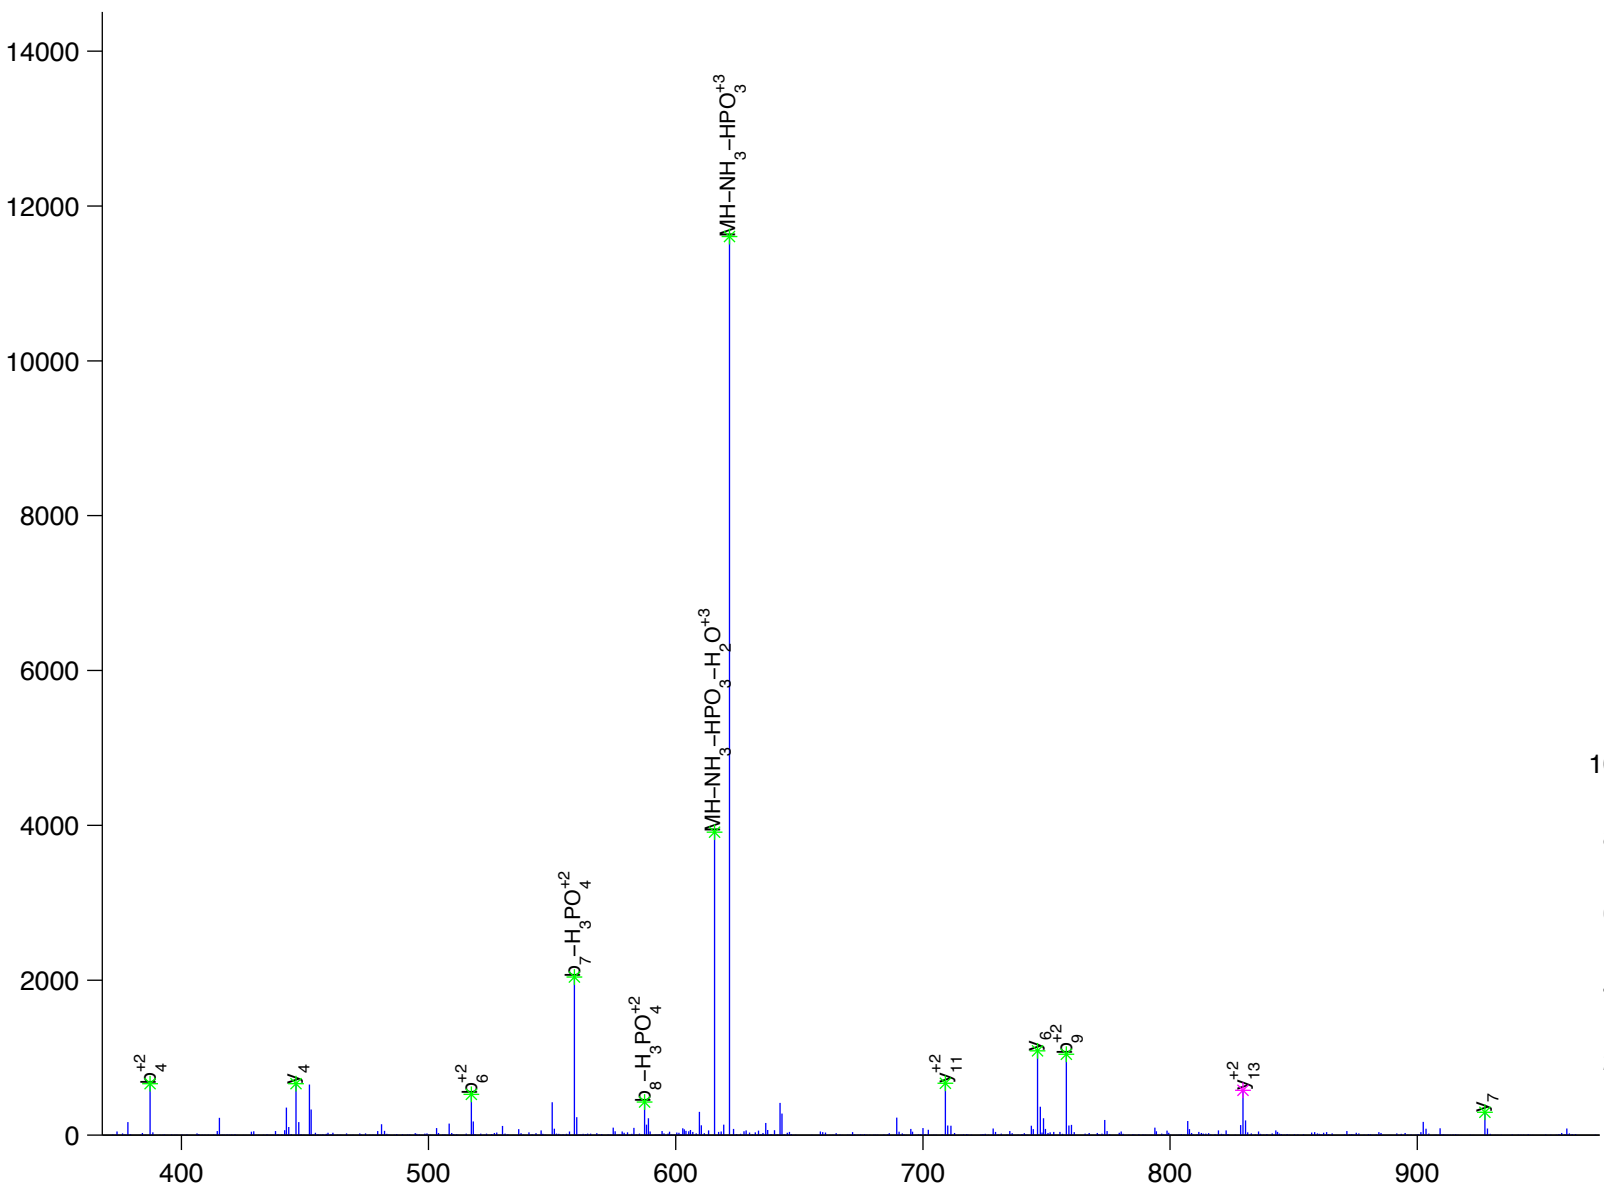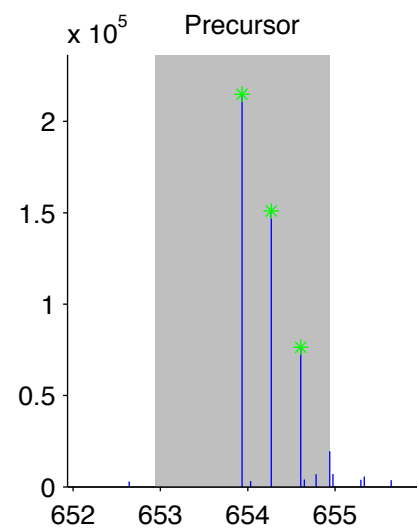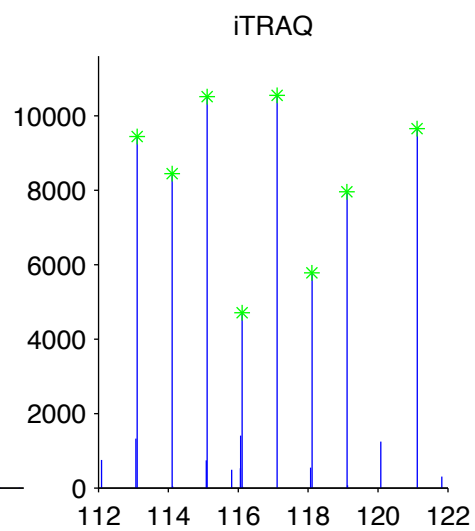

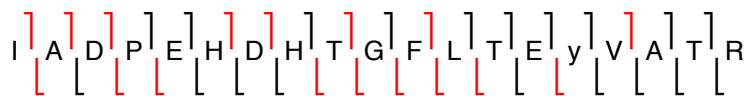

mitogen activated protein kinase 3

Charge State: +3

Scan Number: 4631

File Name: 100905ptp1blivers\_ncHFD\_basal.raw

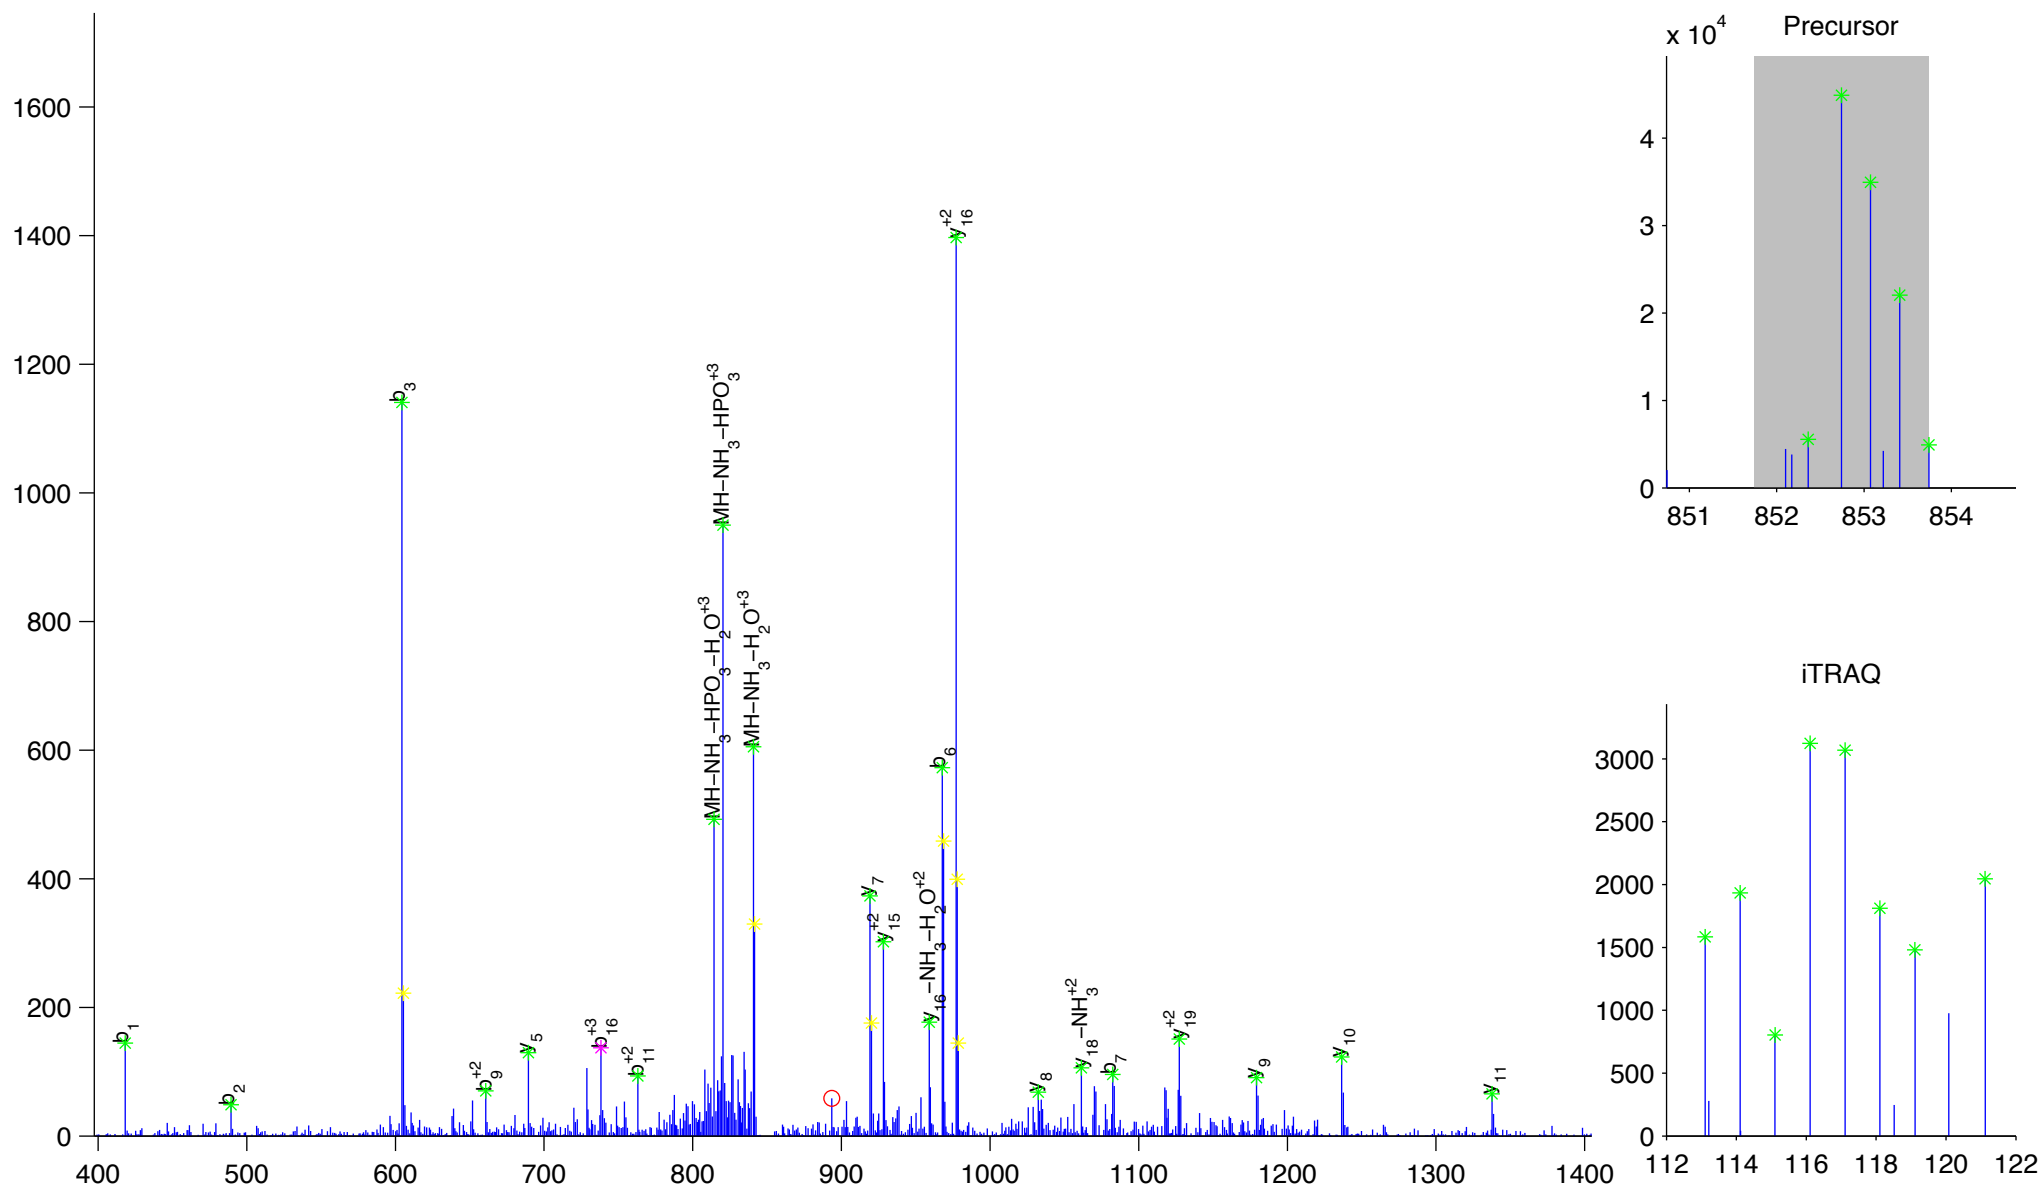



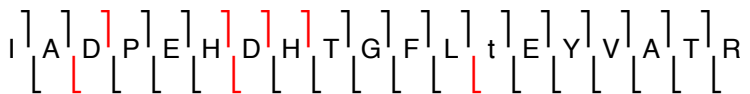

mitogen activated protein kinase 3

Charge State: +3

Scan Number: 5727

File Name: 100611ptp1blivers\_nc\_basal.raw

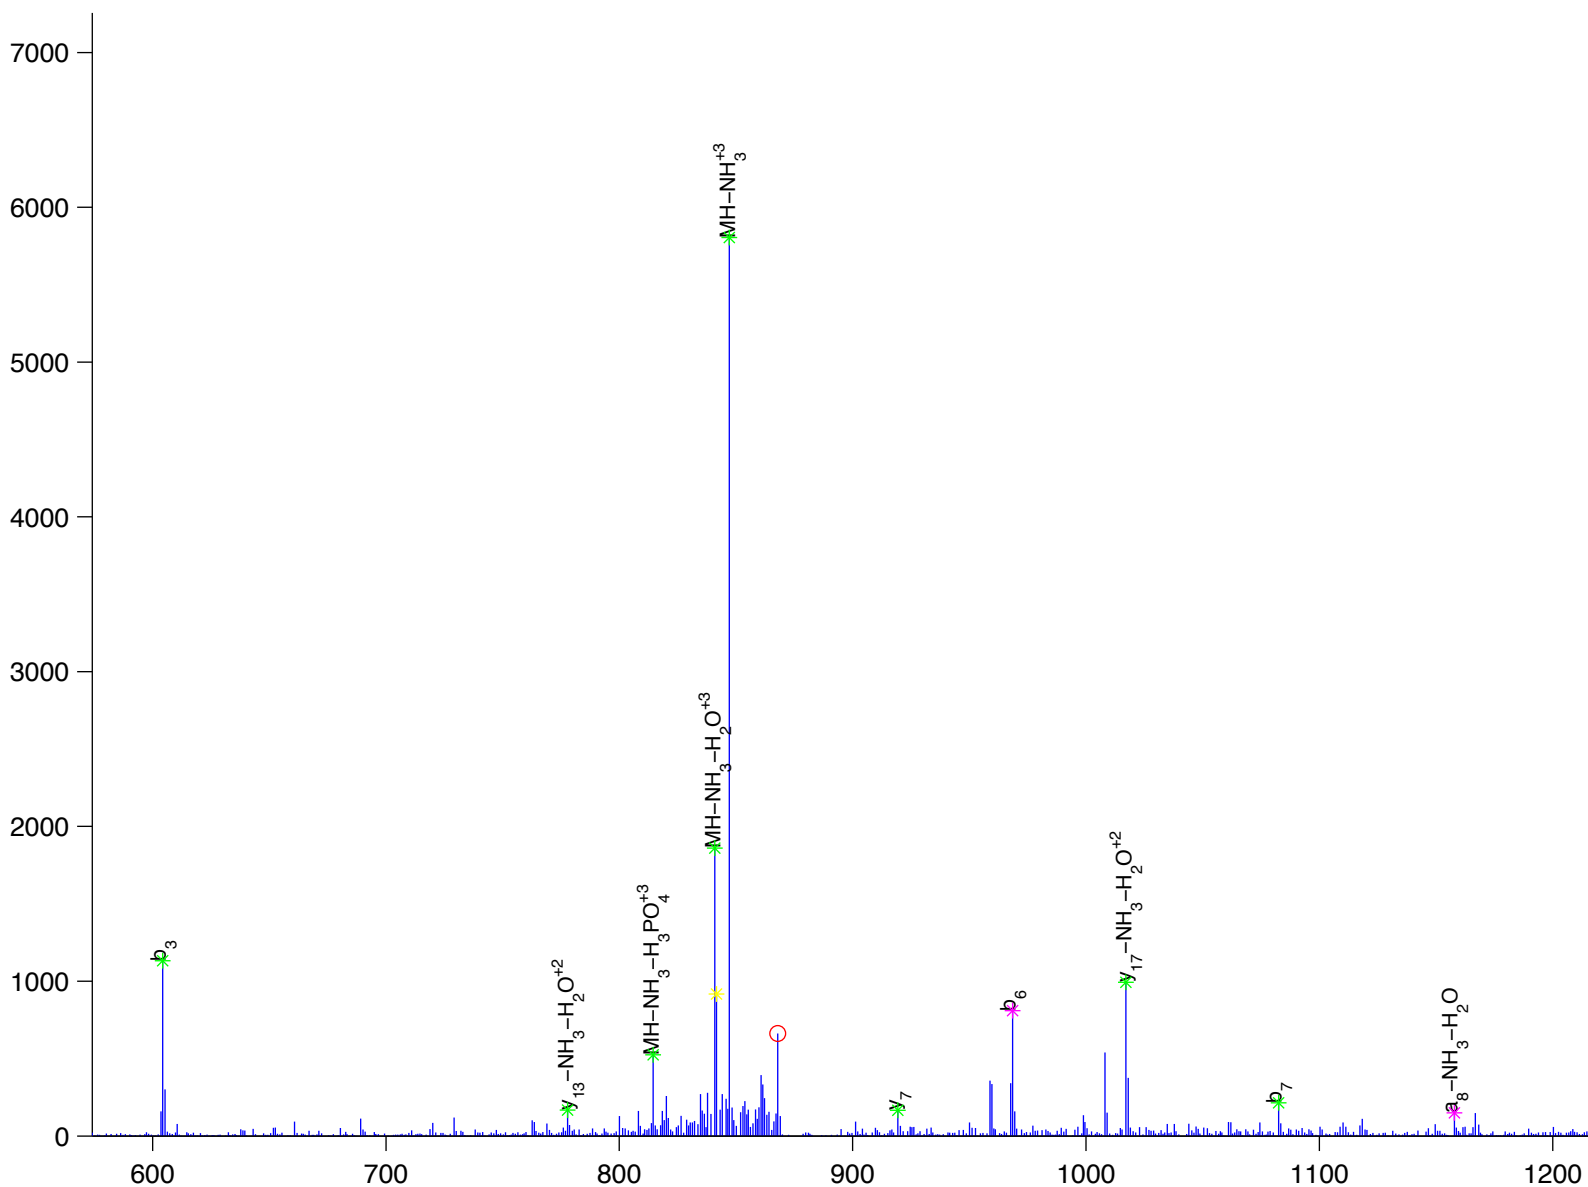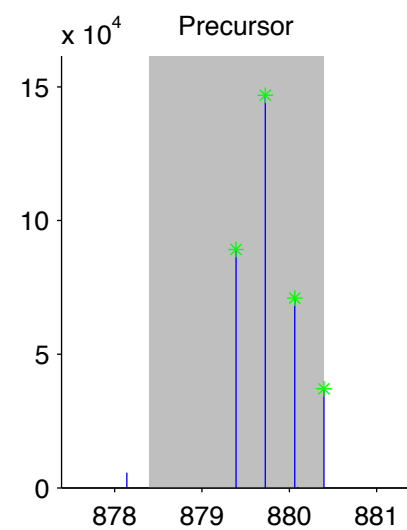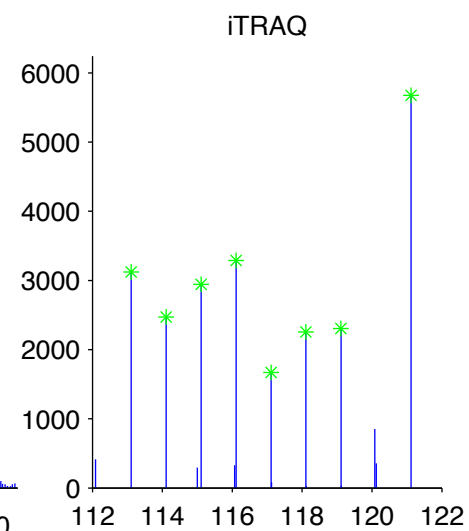

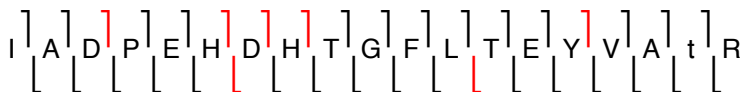

mitogen activated protein kinase 3

Charge State: +3

Scan Number: 5727

File Name: 100611ptp1blivers\_nc\_basal.raw

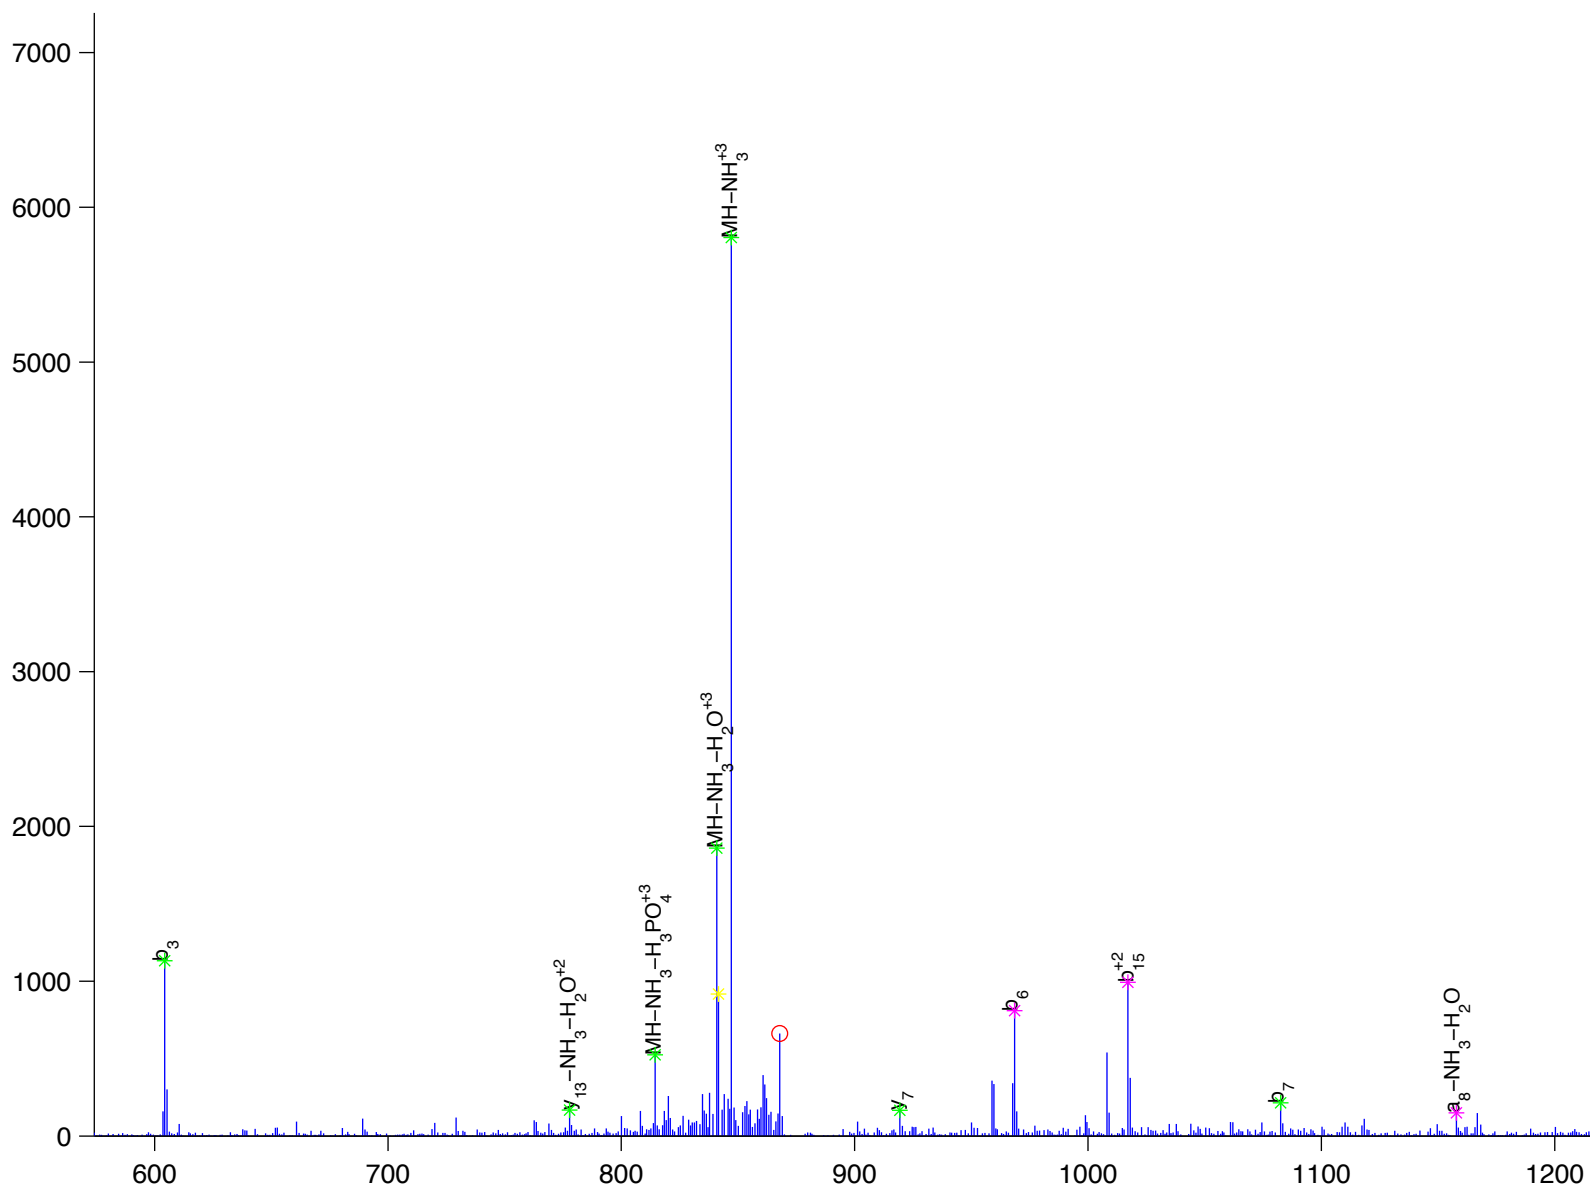

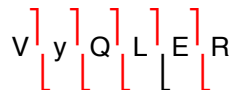

myeloid/lymphoid or mixed lineage–leukemia translocation to 4 homolog isoform 1

Charge State: +2

Scan Number: 5432

File Name: 0090807ptp1blivers\_M\_HFD2.raw

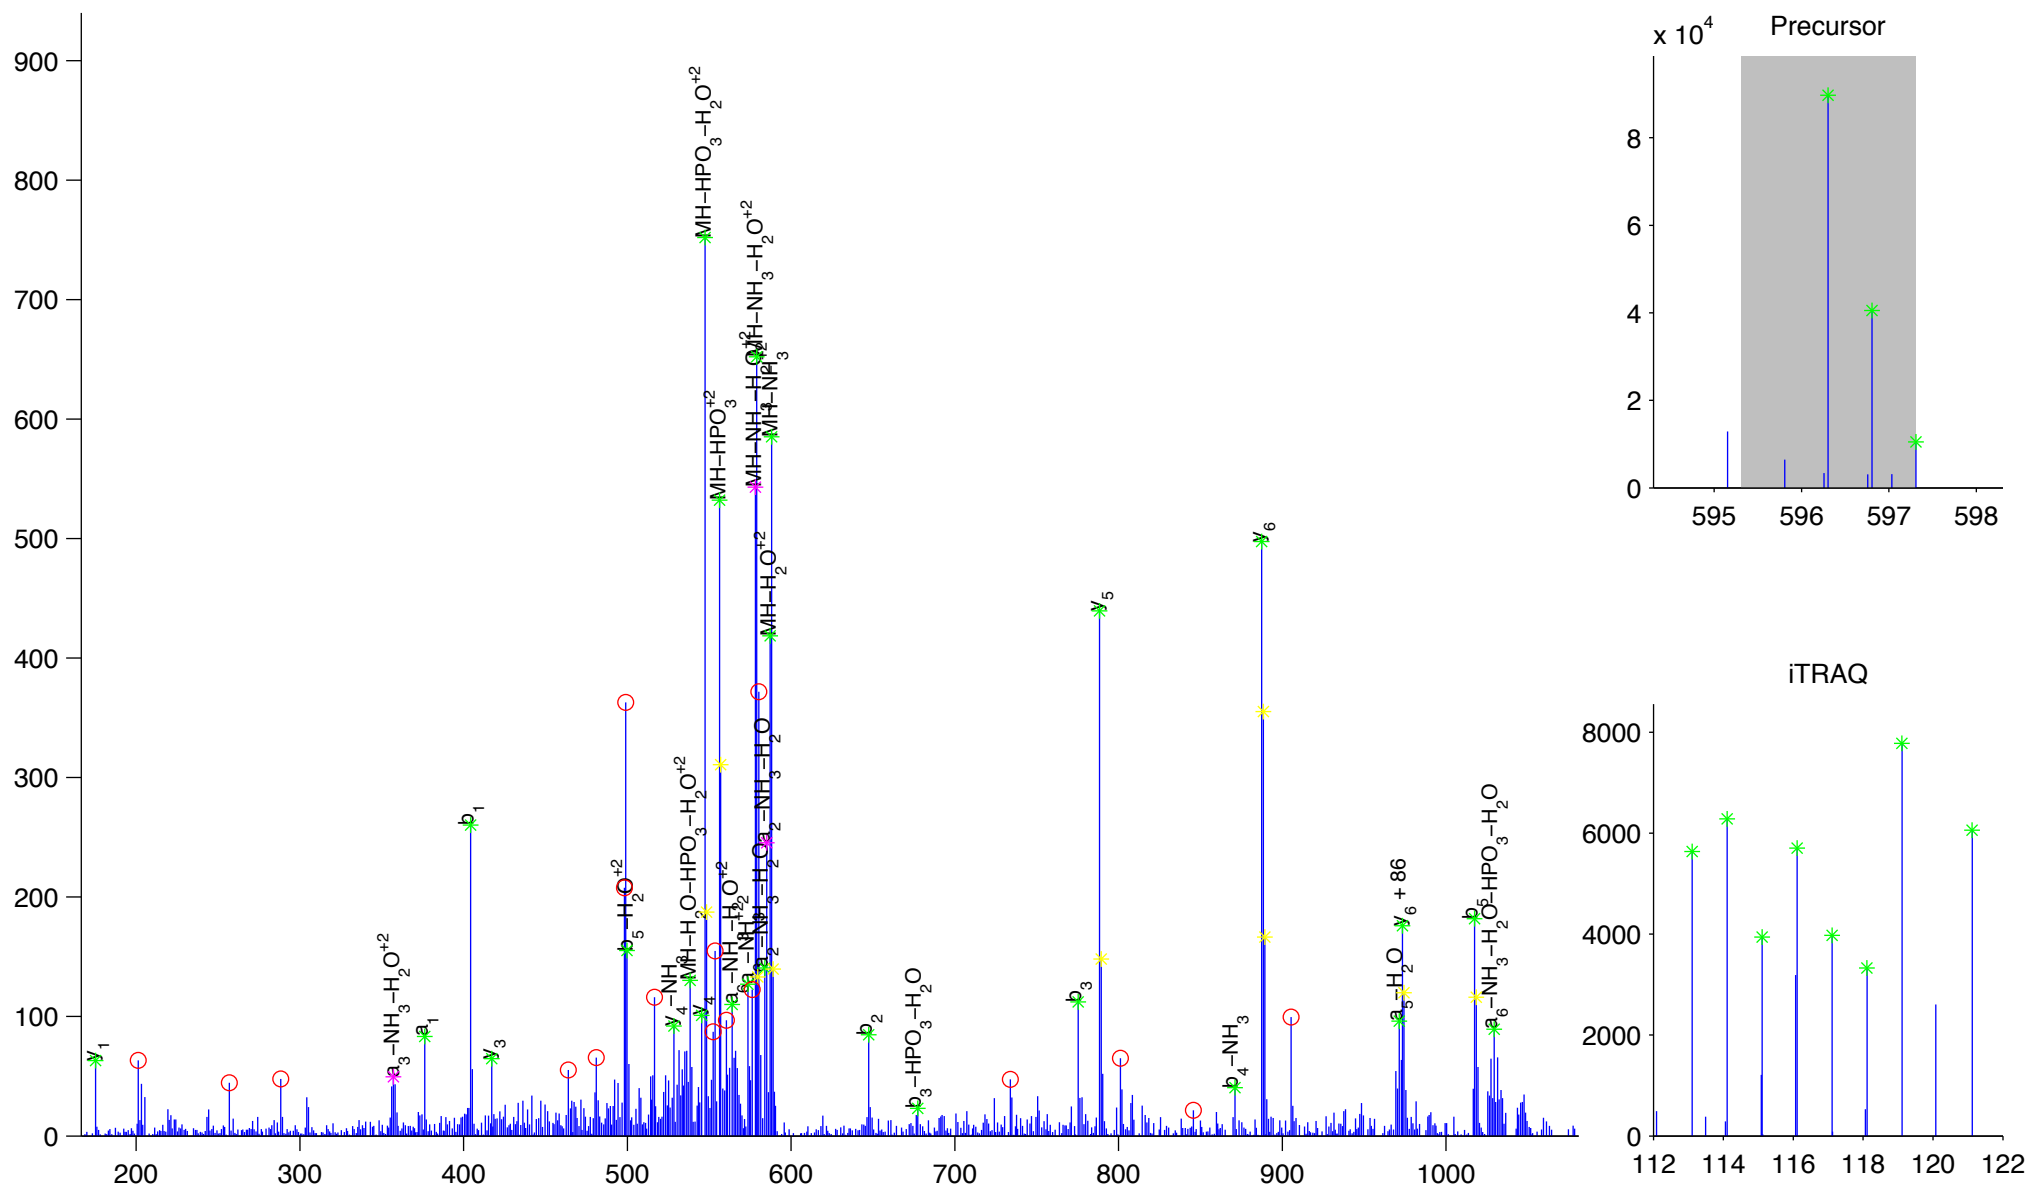

E [ y ] F T F P A S K  
[ [ [ [ [ [ [ [ ] ] ] ] ] ] ] ]

myeloid/lymphoid or mixed lineage–leukemia translocation to 4 homolog isoform 1

Charge State: +3

Scan Number: 6969

File Name: 090806ptp1blivers\_M\_NC2.raw

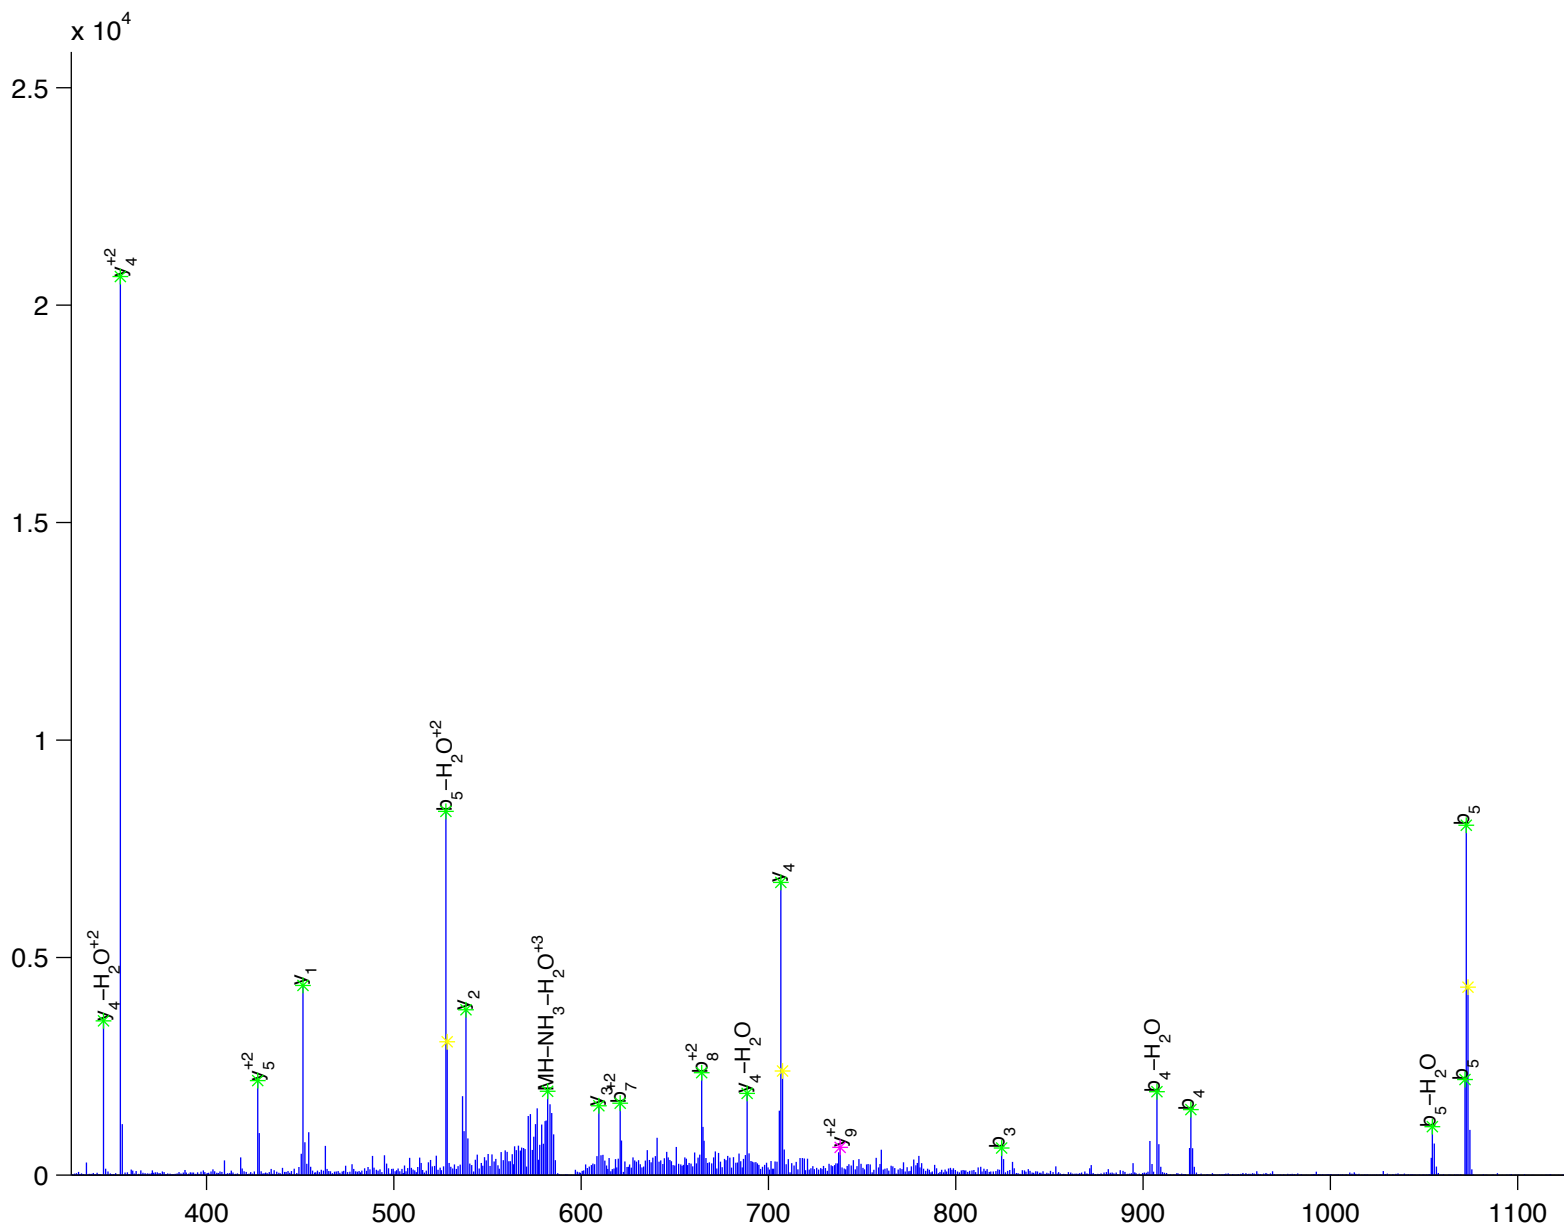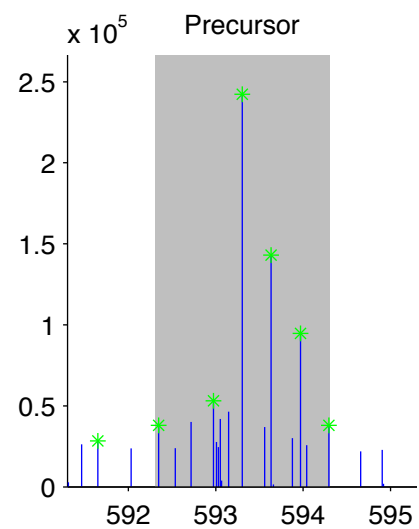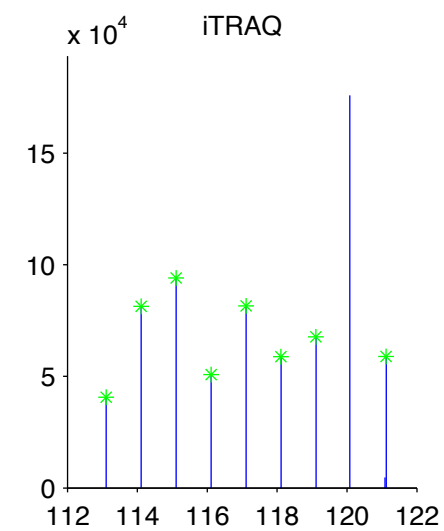

G I V V y T G D R

Na<sup>+</sup>/K<sup>+</sup> -ATPase alpha 1 subunit

Charge State: +2

Scan Number: 4771

File Name: 091130ptp1blivers\_hfd\_basal2.raw

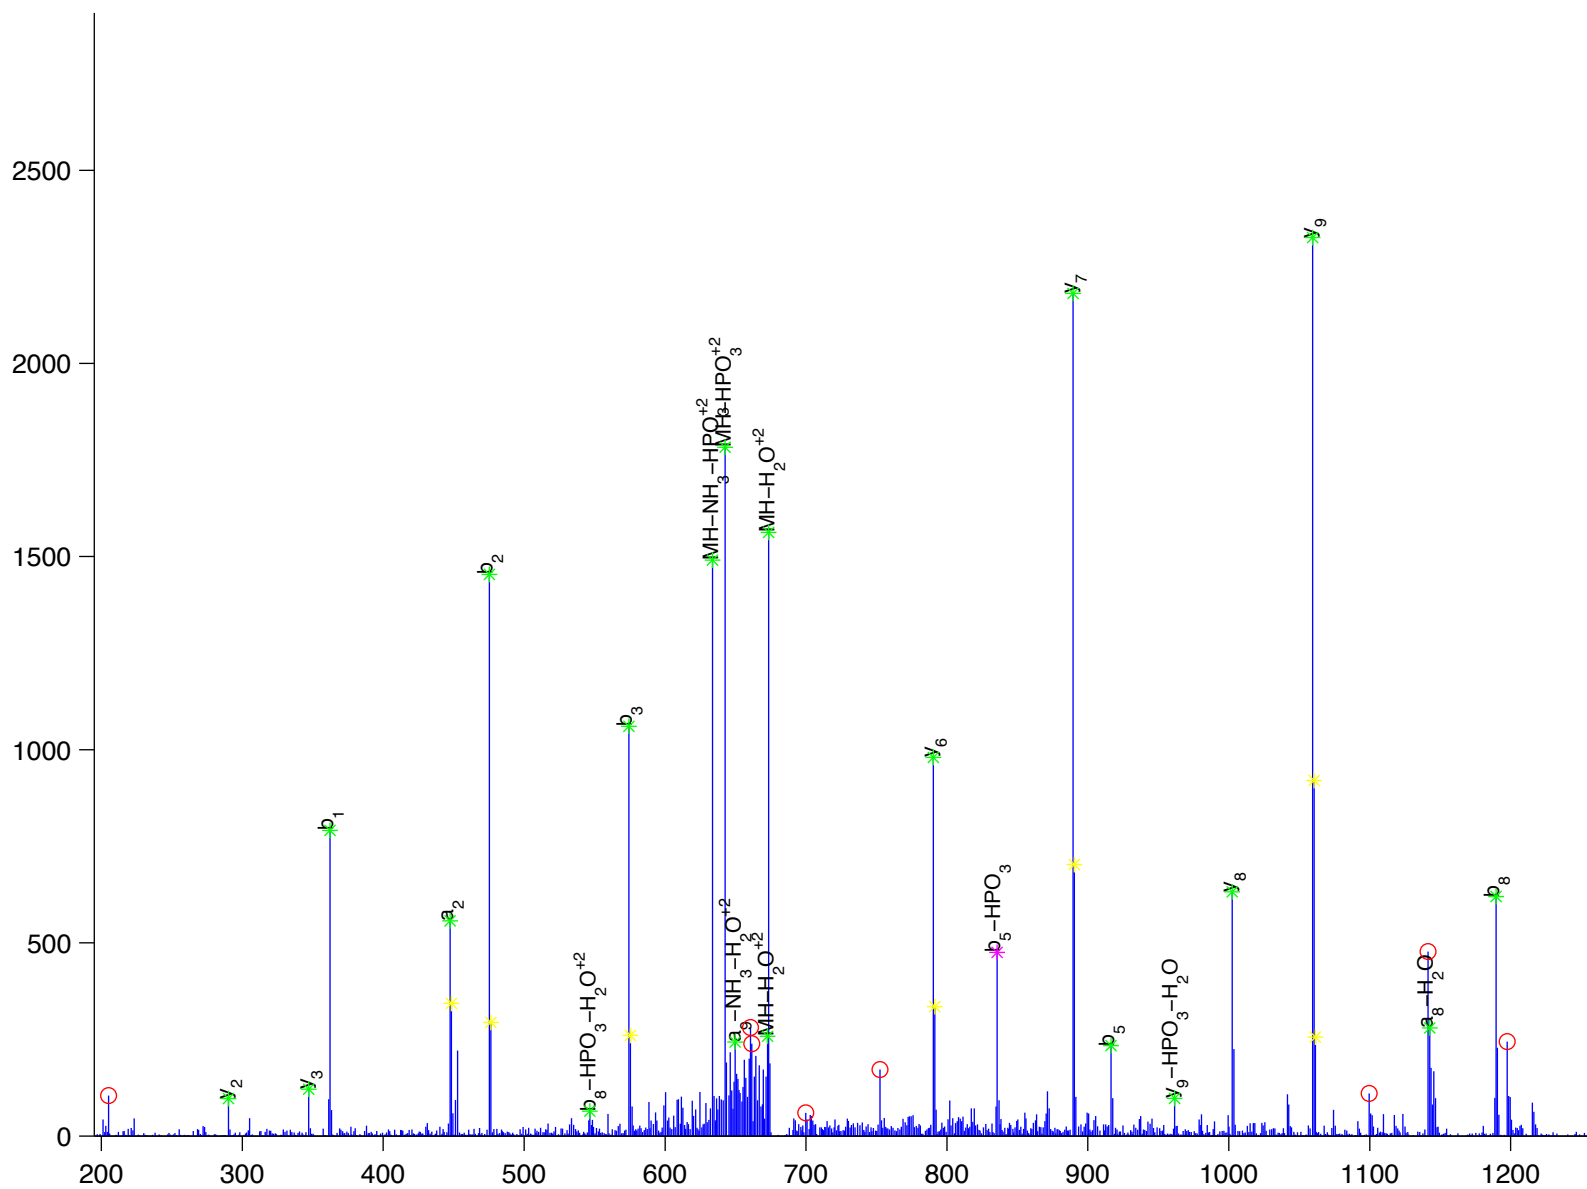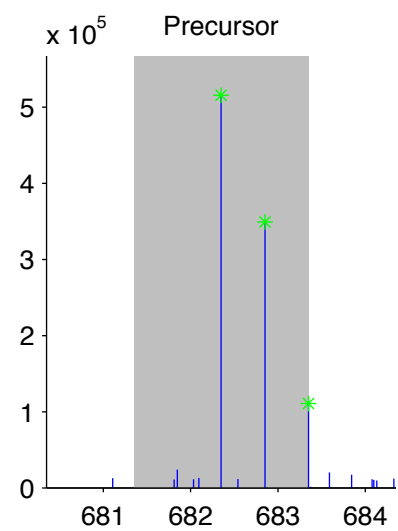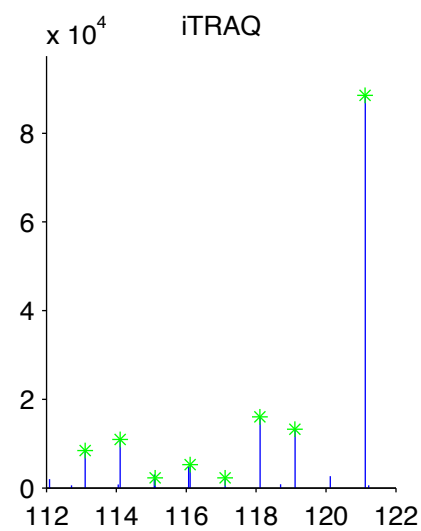

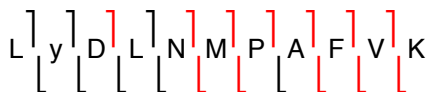

non-catalytic region of tyrosine kinase adaptor protein 1

Charge State: +3

Scan Number: 9342

File Name: 090806ptp1blivers\_M\_NC2.raw

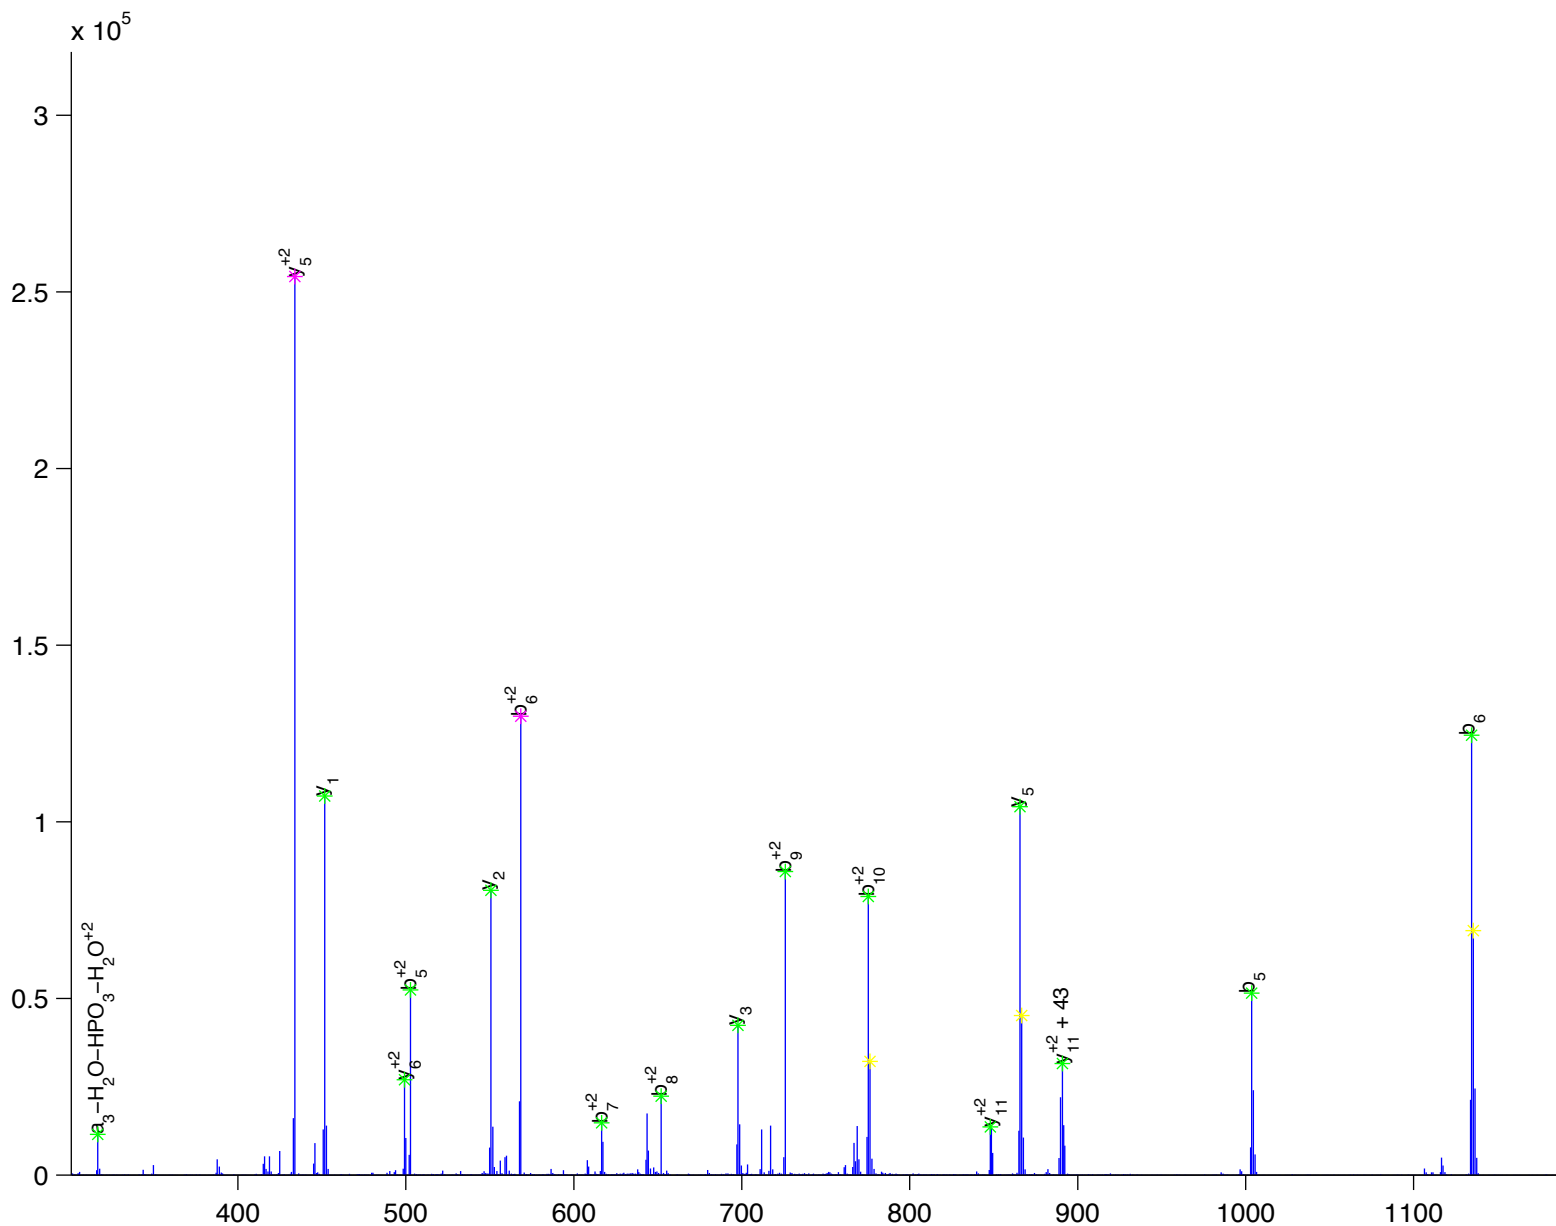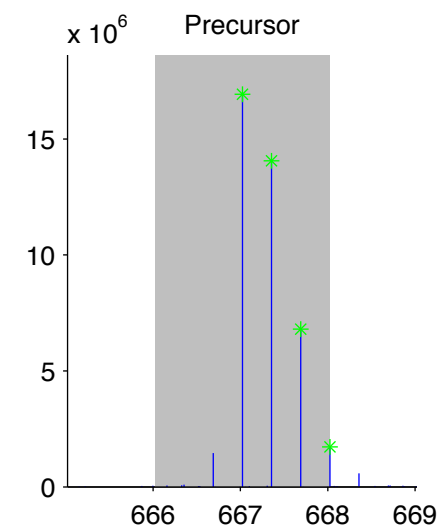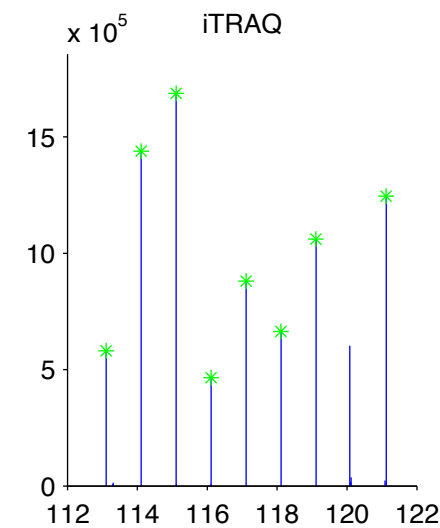

K T E Q G P P S S E y I F E R

ornithine aminotransferase

Charge State: +3

Scan Number: 5517

File Name: 100908ptp1blivers\_ncHFD3\_basal.raw

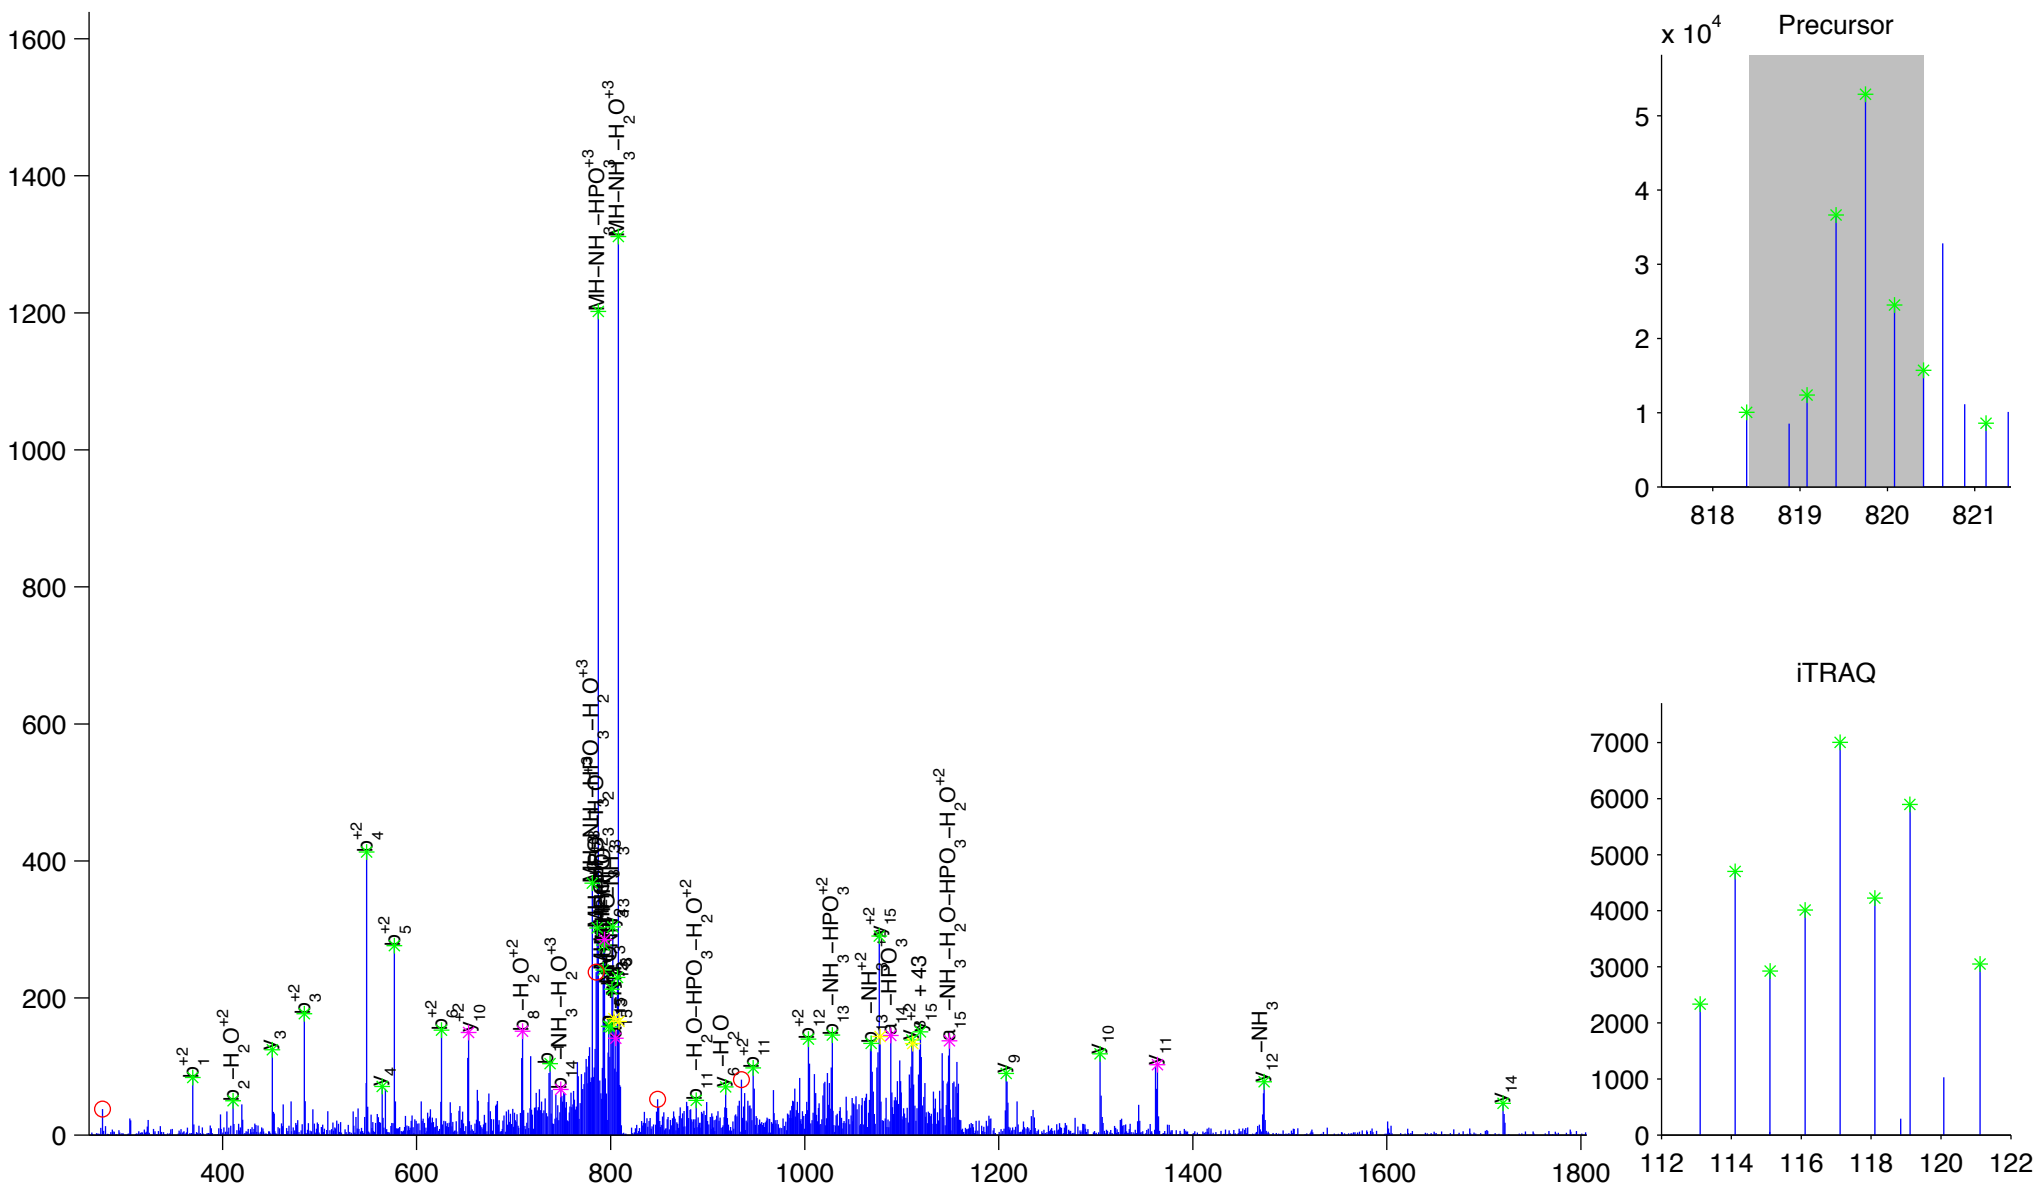





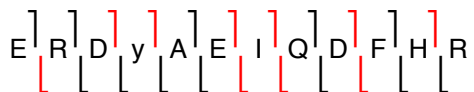

partitioning-defective protein 3 homolog isoform 3

Charge State: +3

Scan Number: 4227

File Name: 091130ptp1blivers\_hfd\_basal2.raw

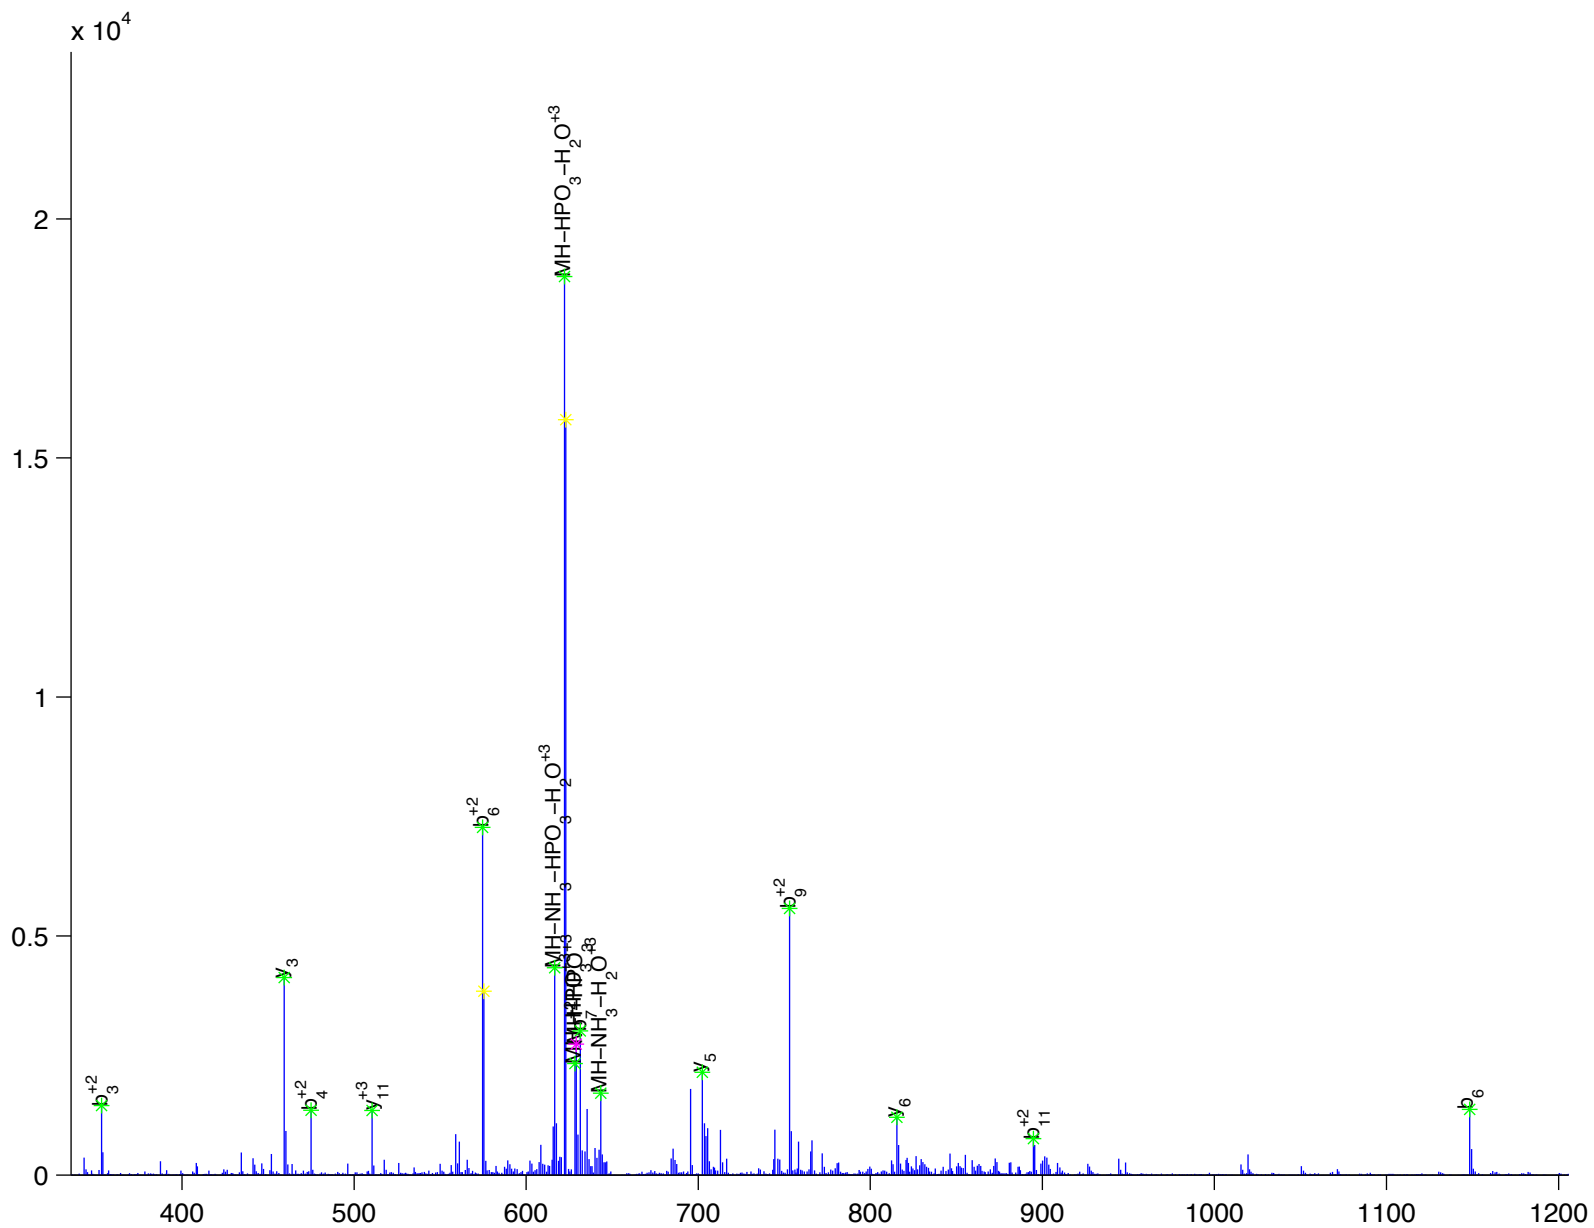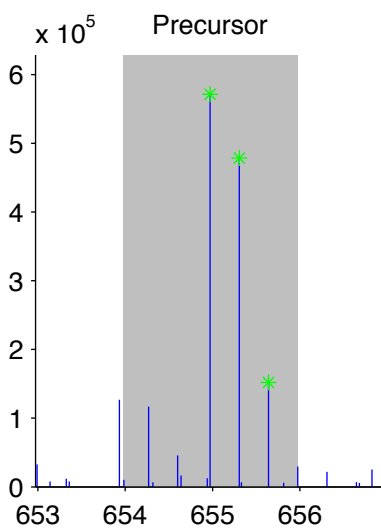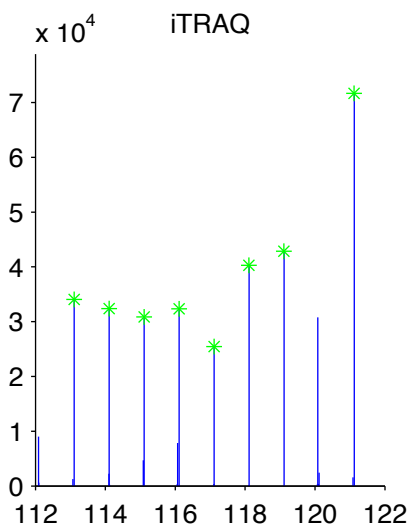

E [G] H [L] M [D] T [L] y [A] Q [V] K

partitioning-defective protein 3 homolog isoform 3

Charge State: +3

Scan Number: 5884

File Name: 091130ptp1blivers\_hfd\_basal2.raw

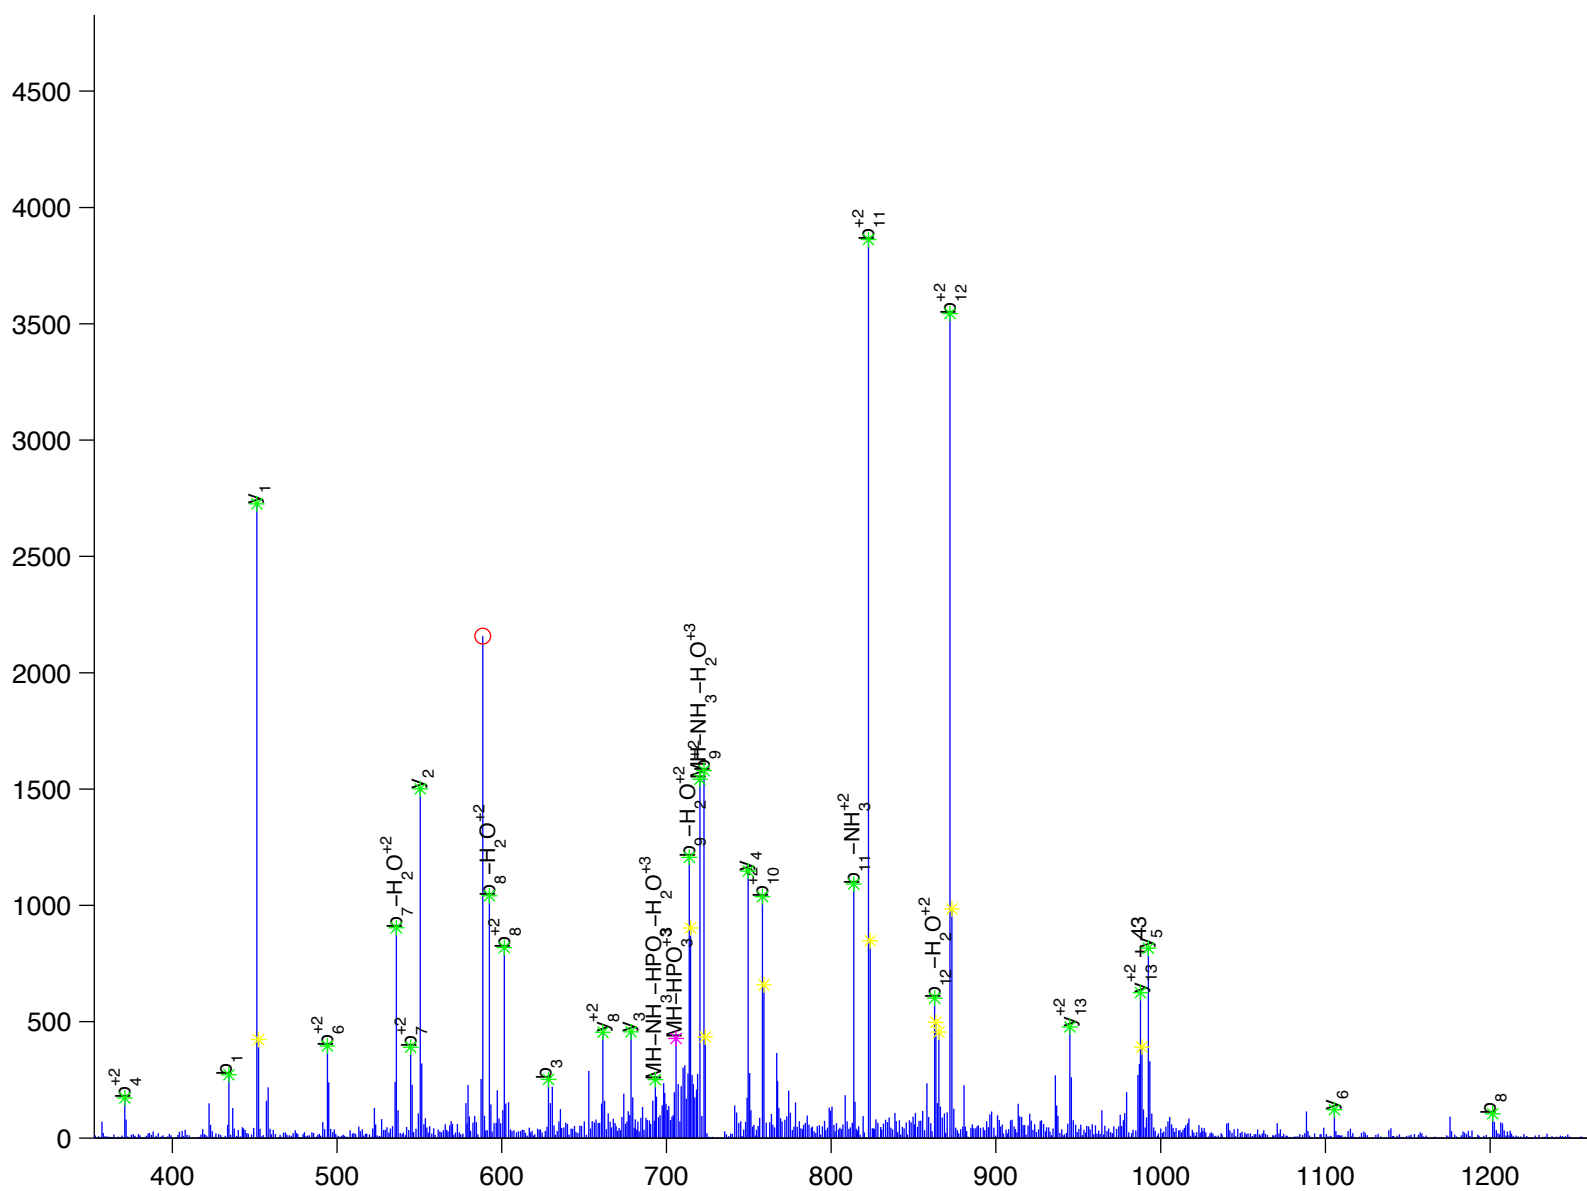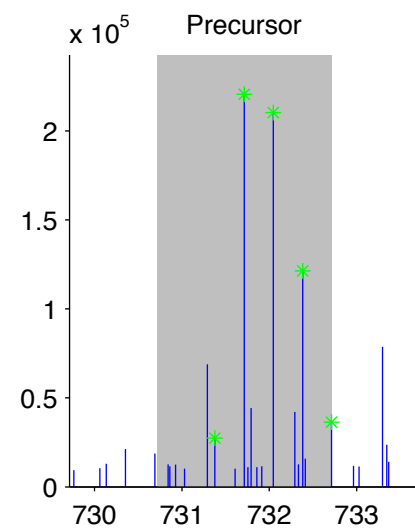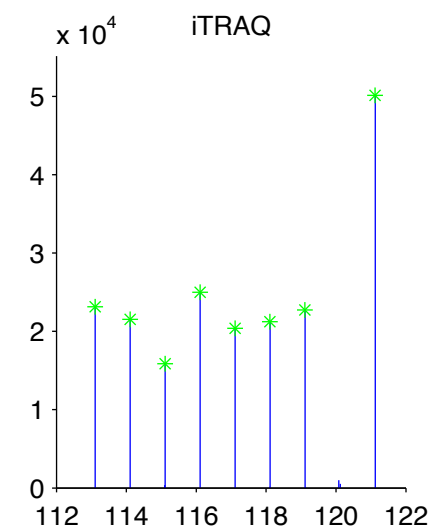

A [G] [E] [E] [E] [H] [V] [y] [S] [F] [P] [N] K

paxillin isoform alpha

Charge State: +3

Scan Number: 3672

File Name: 100905ptp1blivers\_ncHFD\_basal.raw

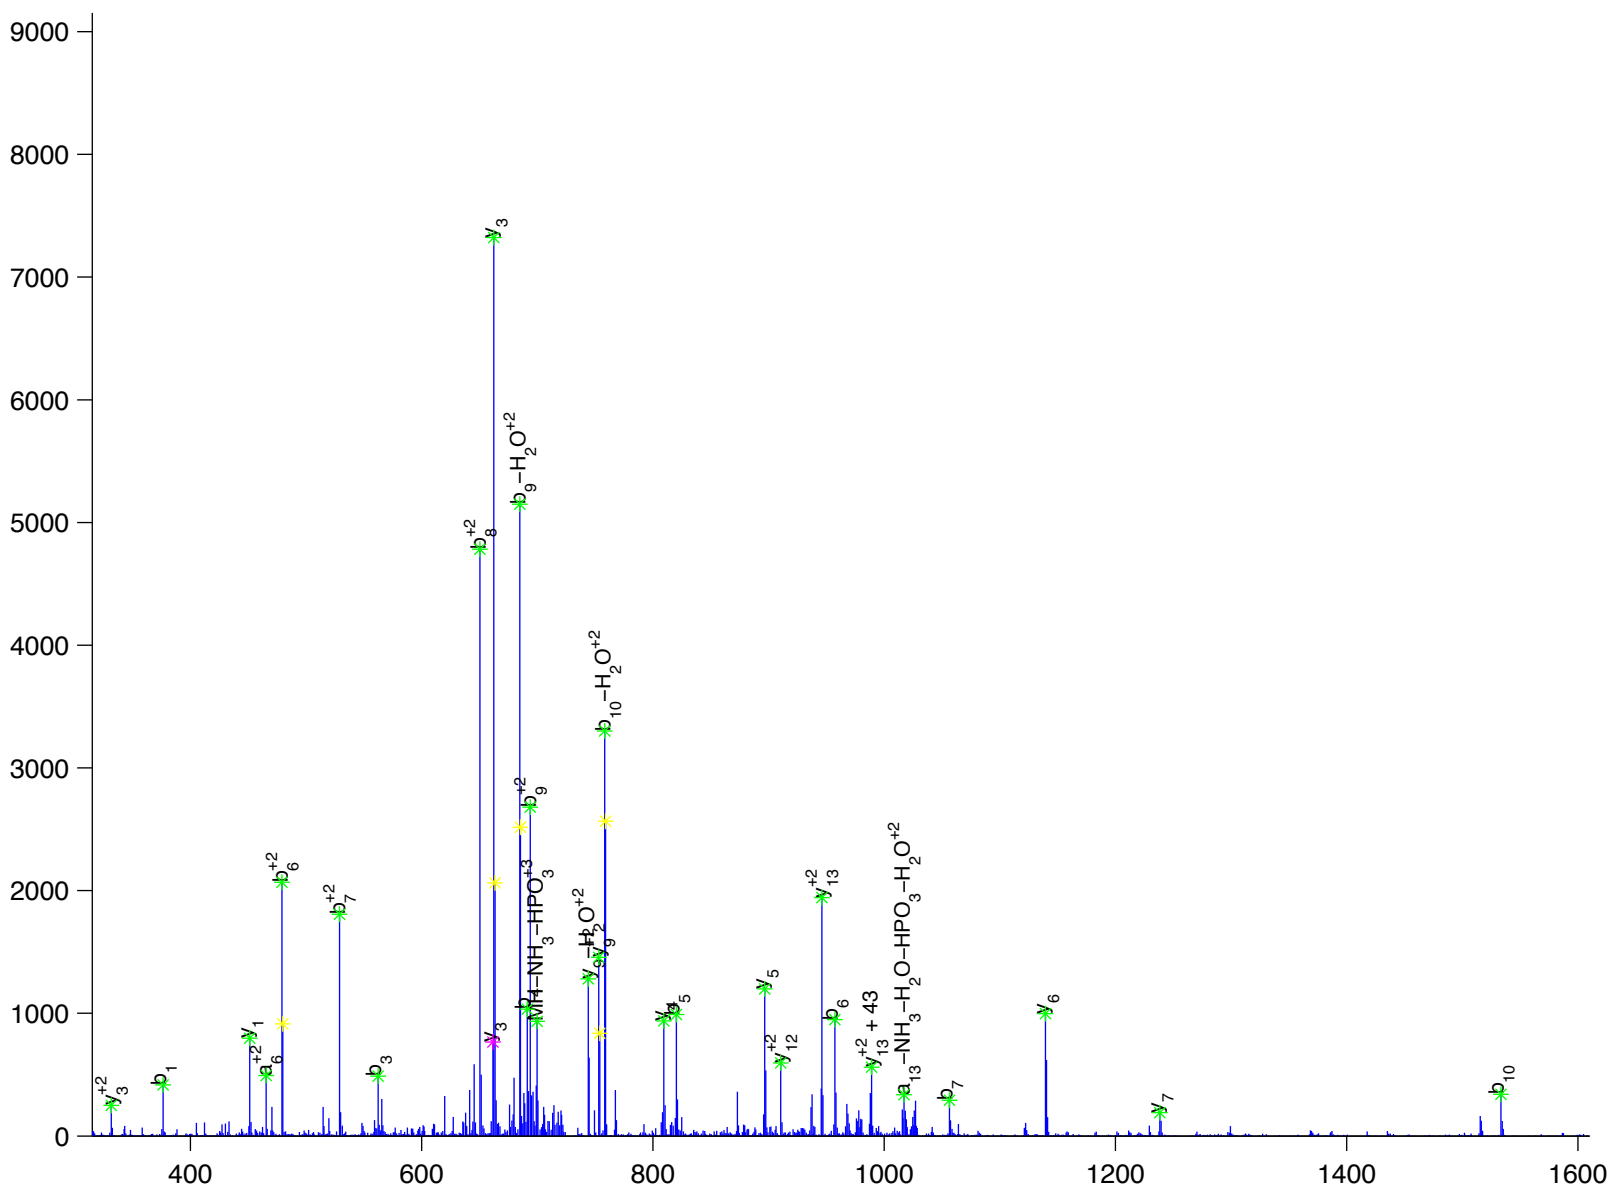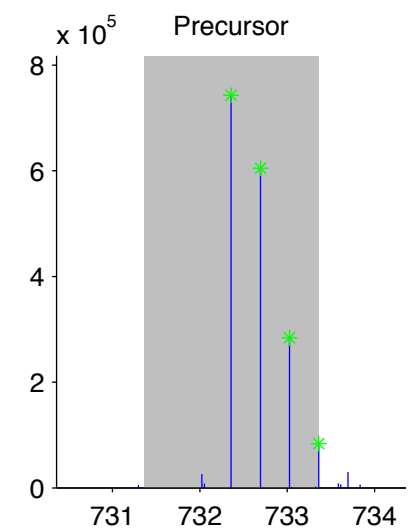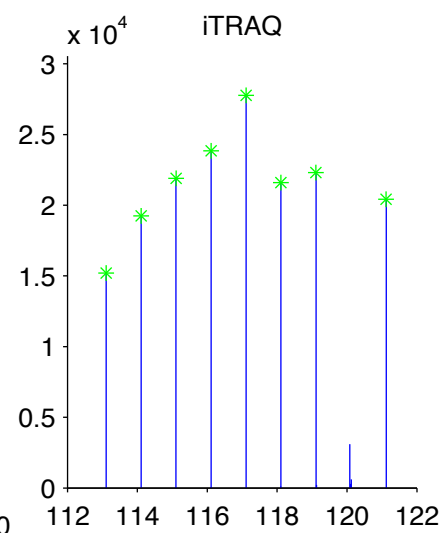

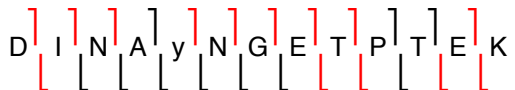

peroxiredoxin 6

Charge State: +3

Scan Number: 3319

File Name: 100905ptp1blivers\_ncHFD\_basal.raw

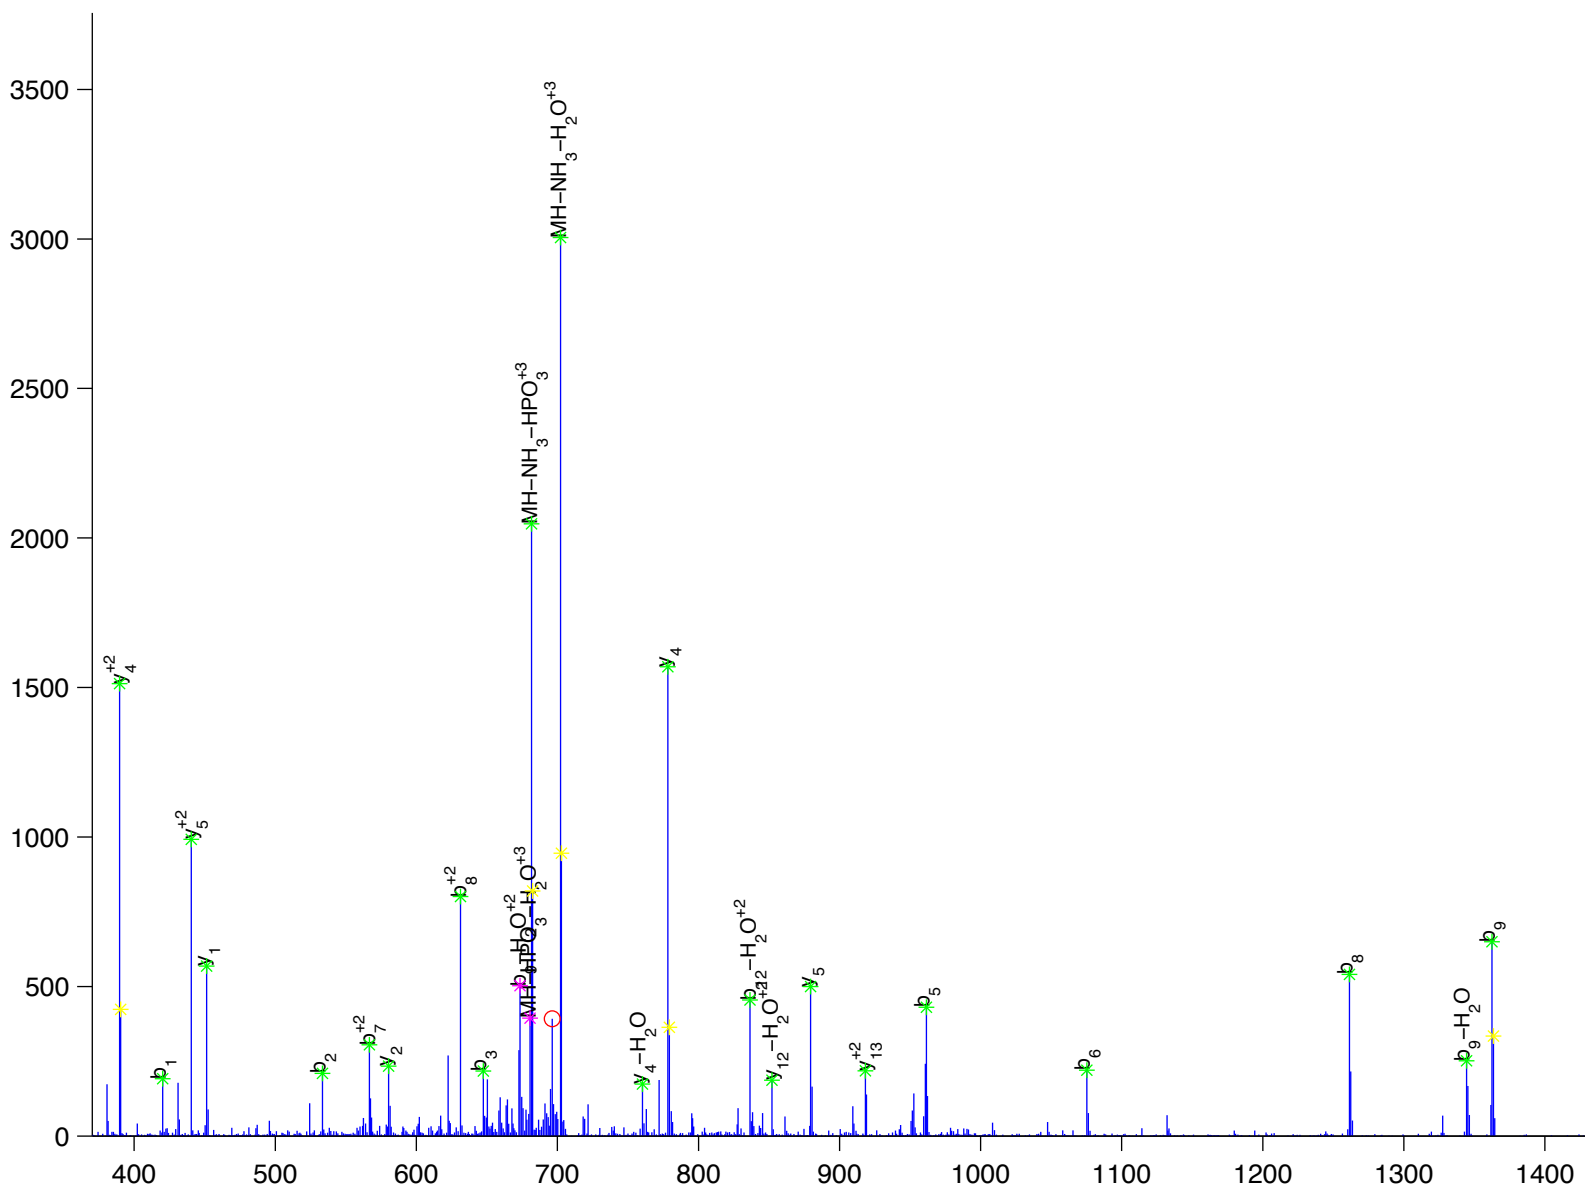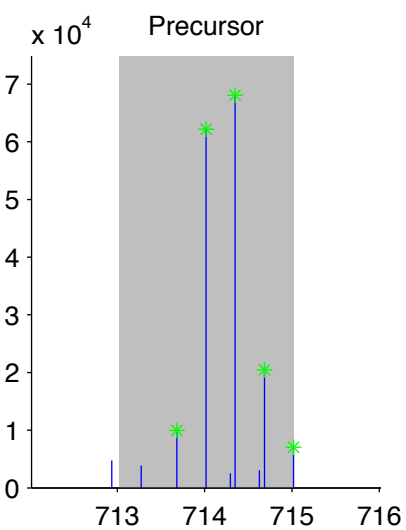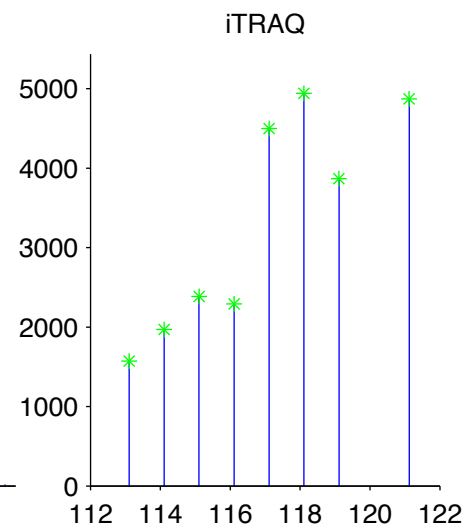

Q[F]A[D]I[A]y[N]Y[R]

phenylalanine hydroxylase

Charge State: +2

Scan Number: 4923

File Name: 090728ptp1blivers\_M\_NC\_ins\_e.raw

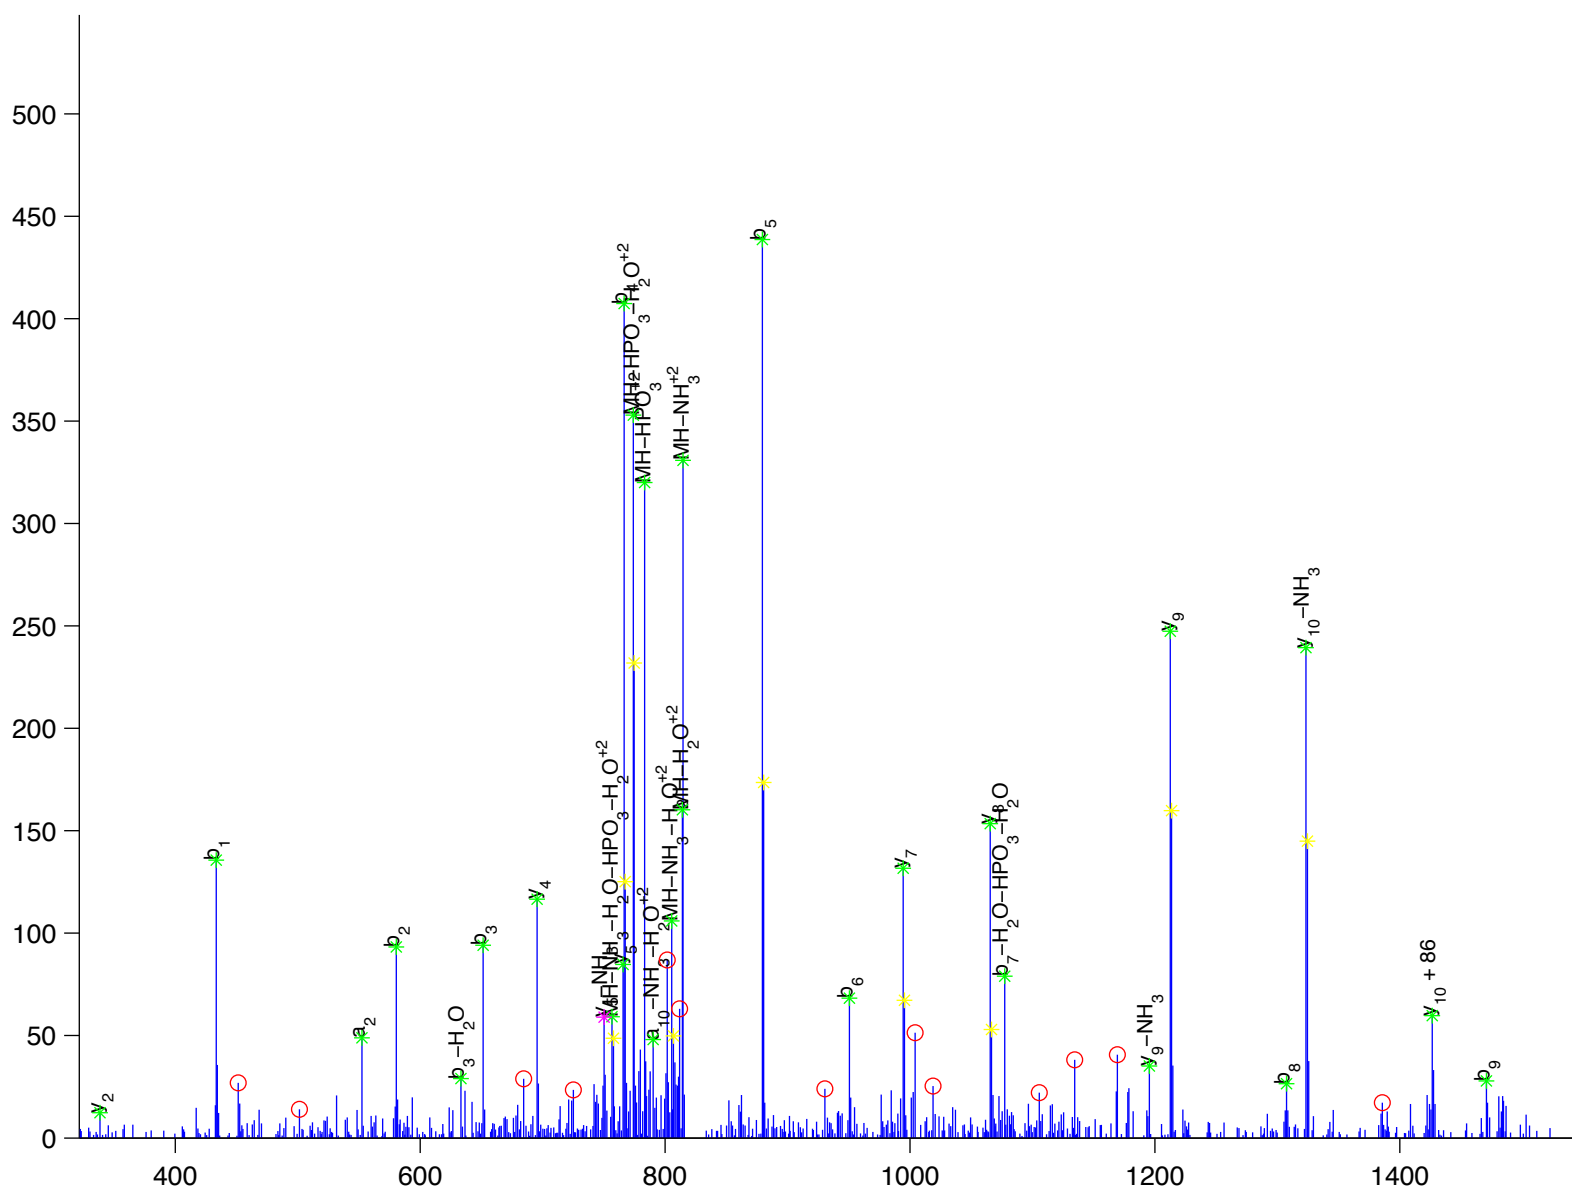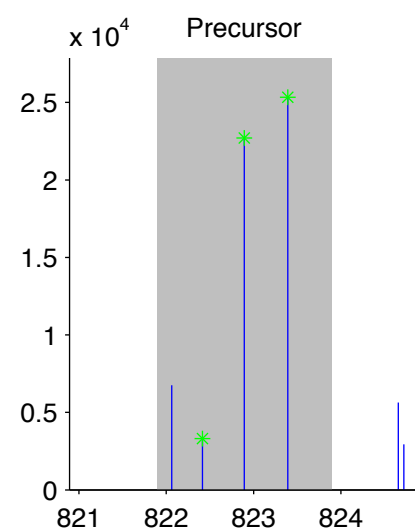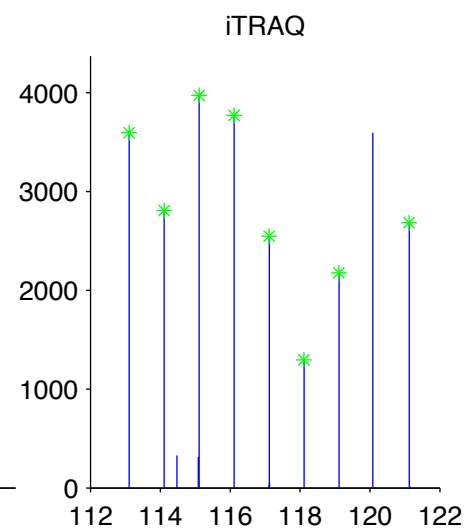

L y E Q L S G

phosphatidylethanolamine binding protein 1  
Charge State: +3  
Scan Number: 5466  
File Name: 091130ptp1blivers\_hfd\_basal2.raw

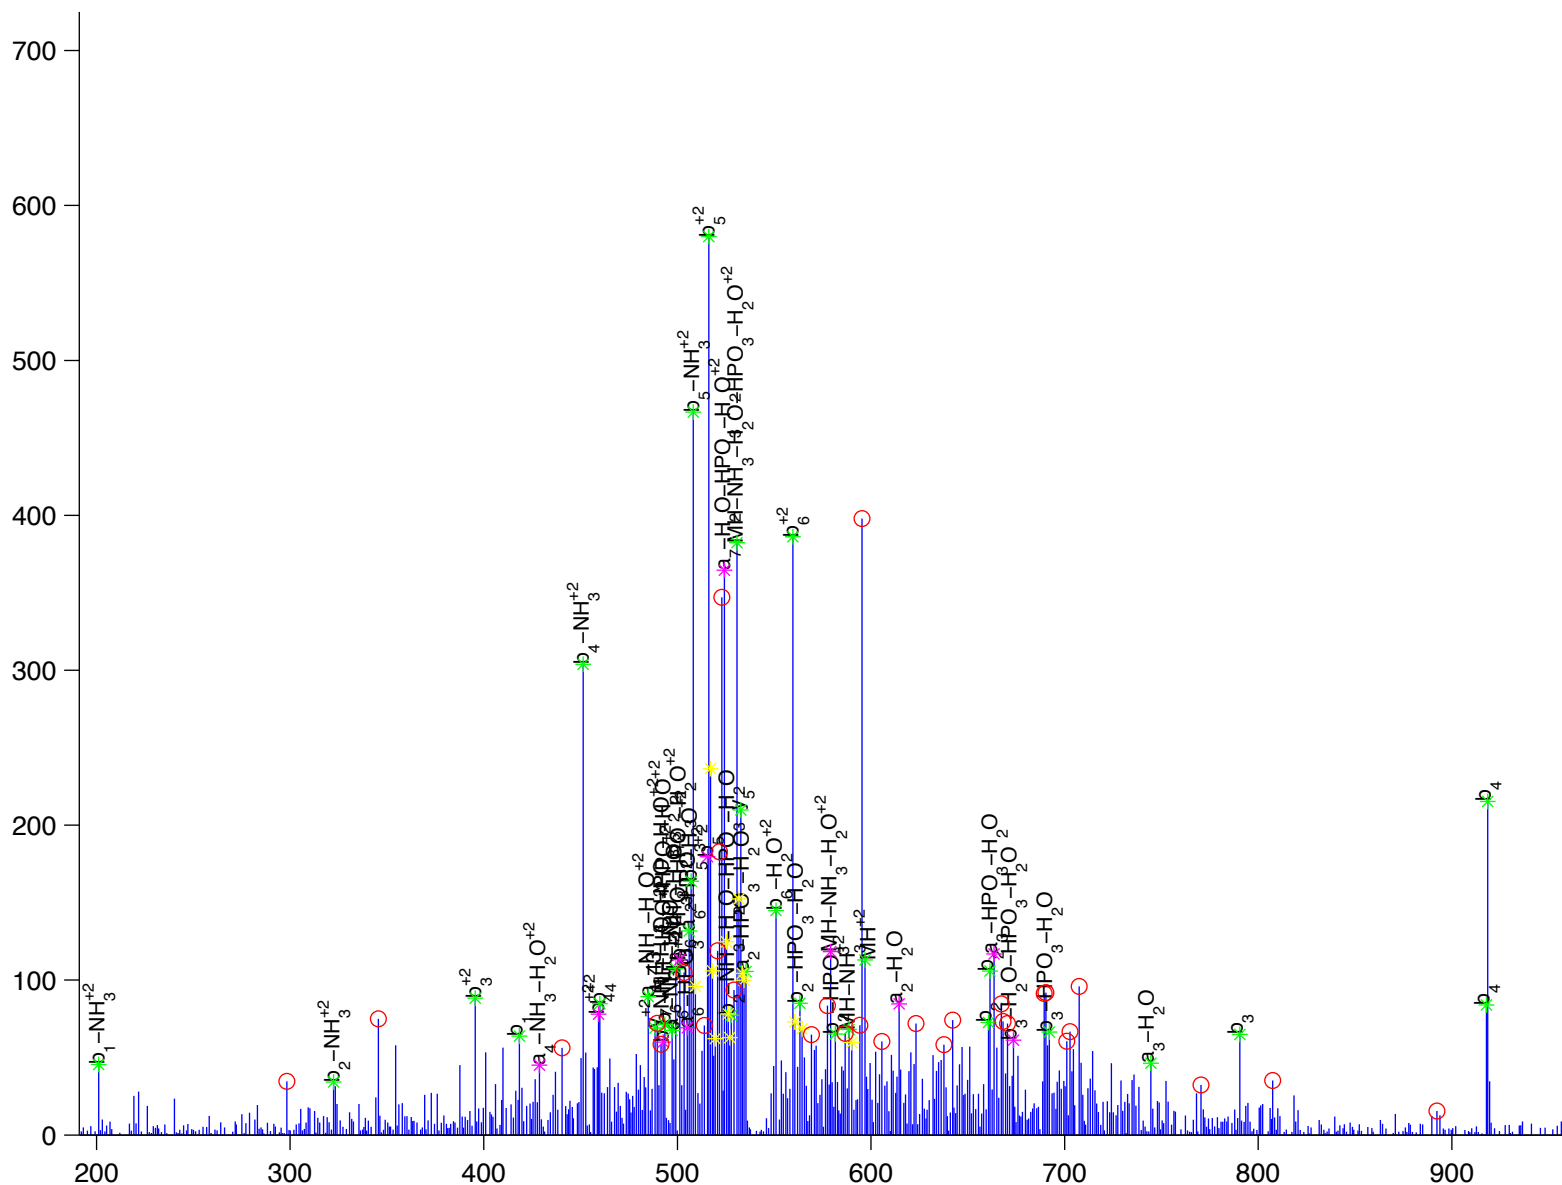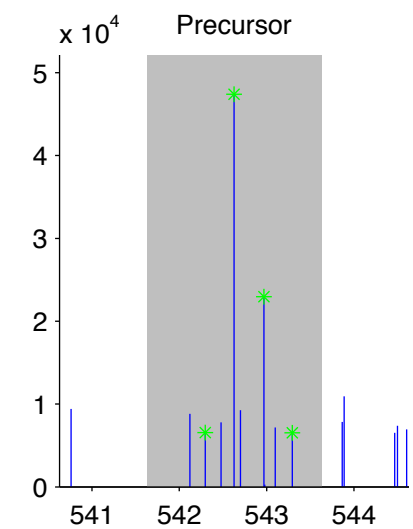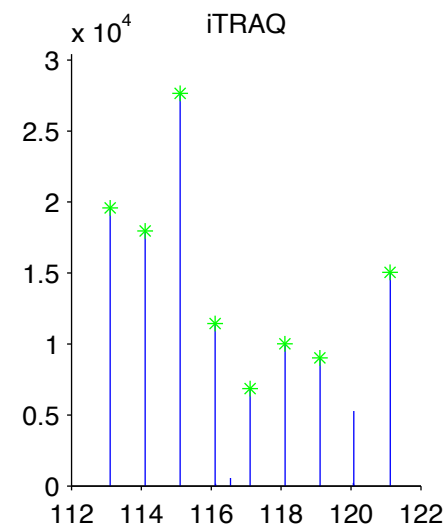

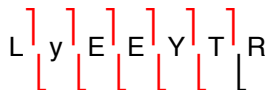

phosphatidylinositol 3 kinase, regulatory subunit, polypeptide 3 (p55)

Charge State: +2

Scan Number: 4407

File Name: 090806ptp1blivers\_M\_NC2.raw

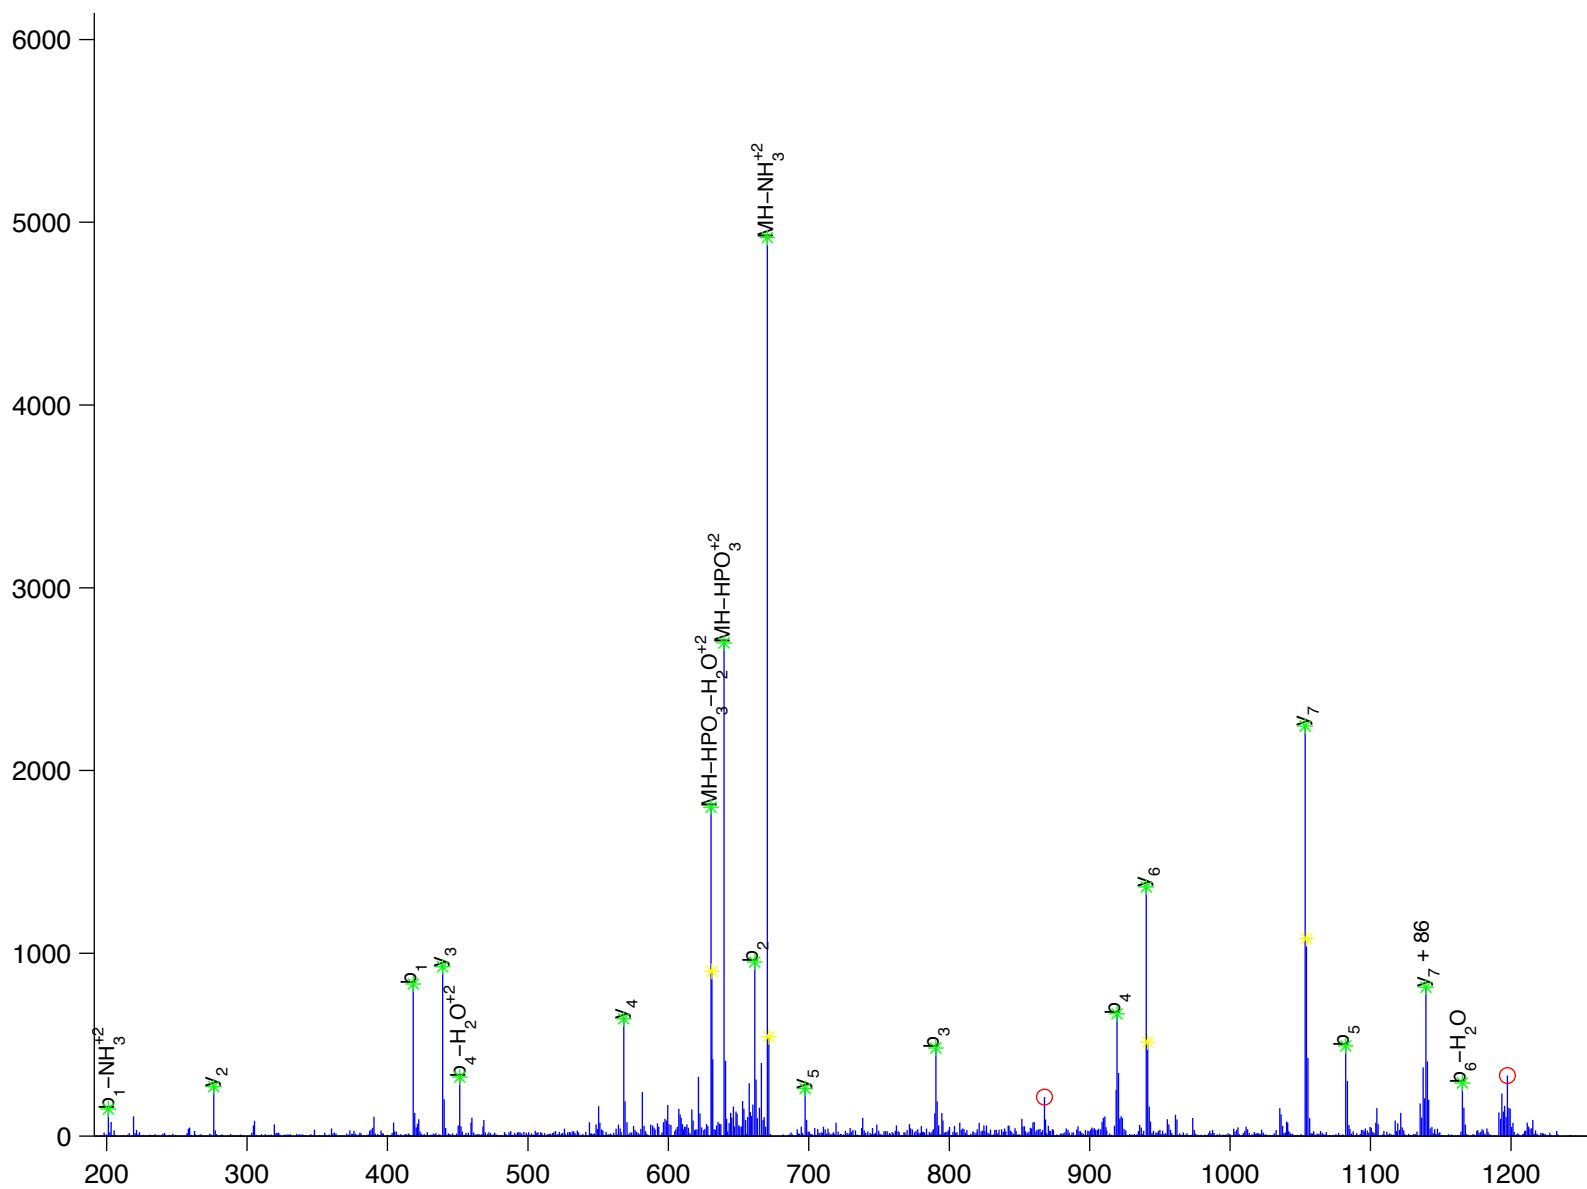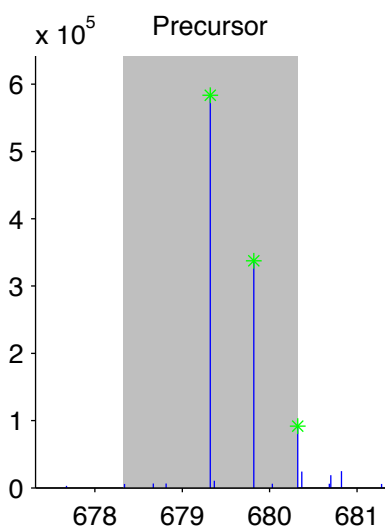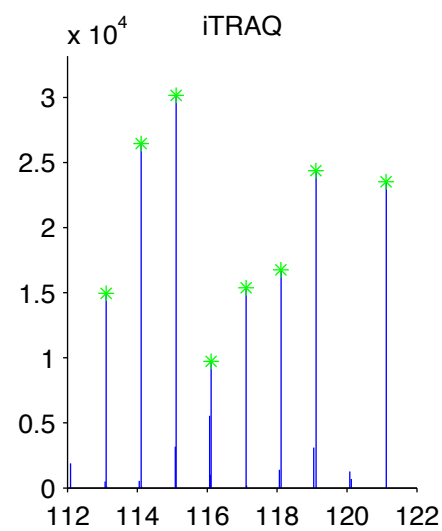

D [ Q ] y [ L ] M [ W ] L [ T ] Q [ K ]

phosphatidylinositol 3-kinase, regulatory subunit, polypeptide 1 isoform 1

Charge State: +3

Scan Number: 6119

File Name: 090728ptp1blivers\_M\_NC\_ins\_e.raw

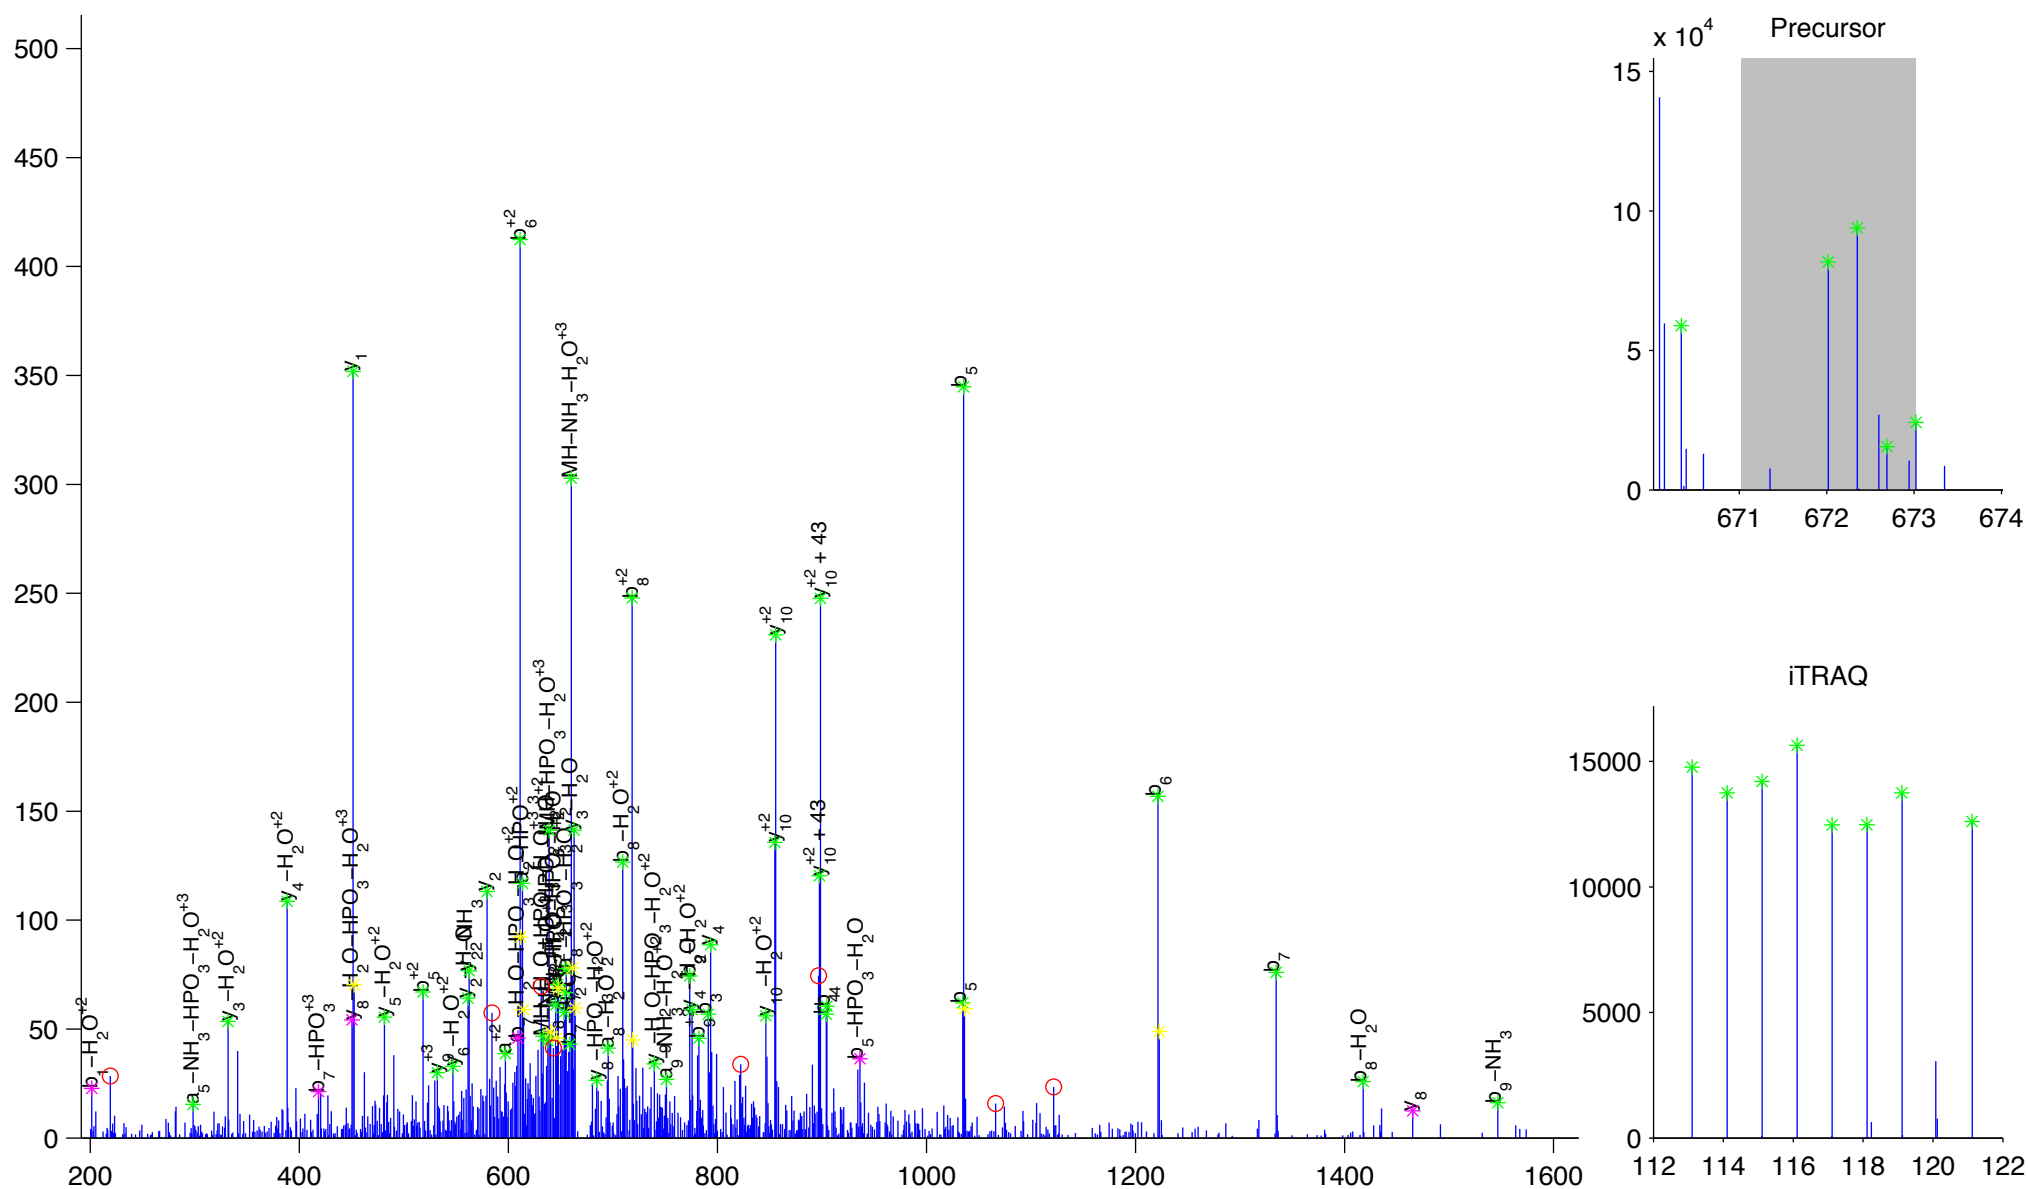



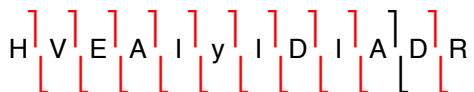

phosphatidylinositol transfer protein, alpha

Charge State: +3

Scan Number: 6071

File Name: 091130ptp1blivers\_hfd\_basal2.raw

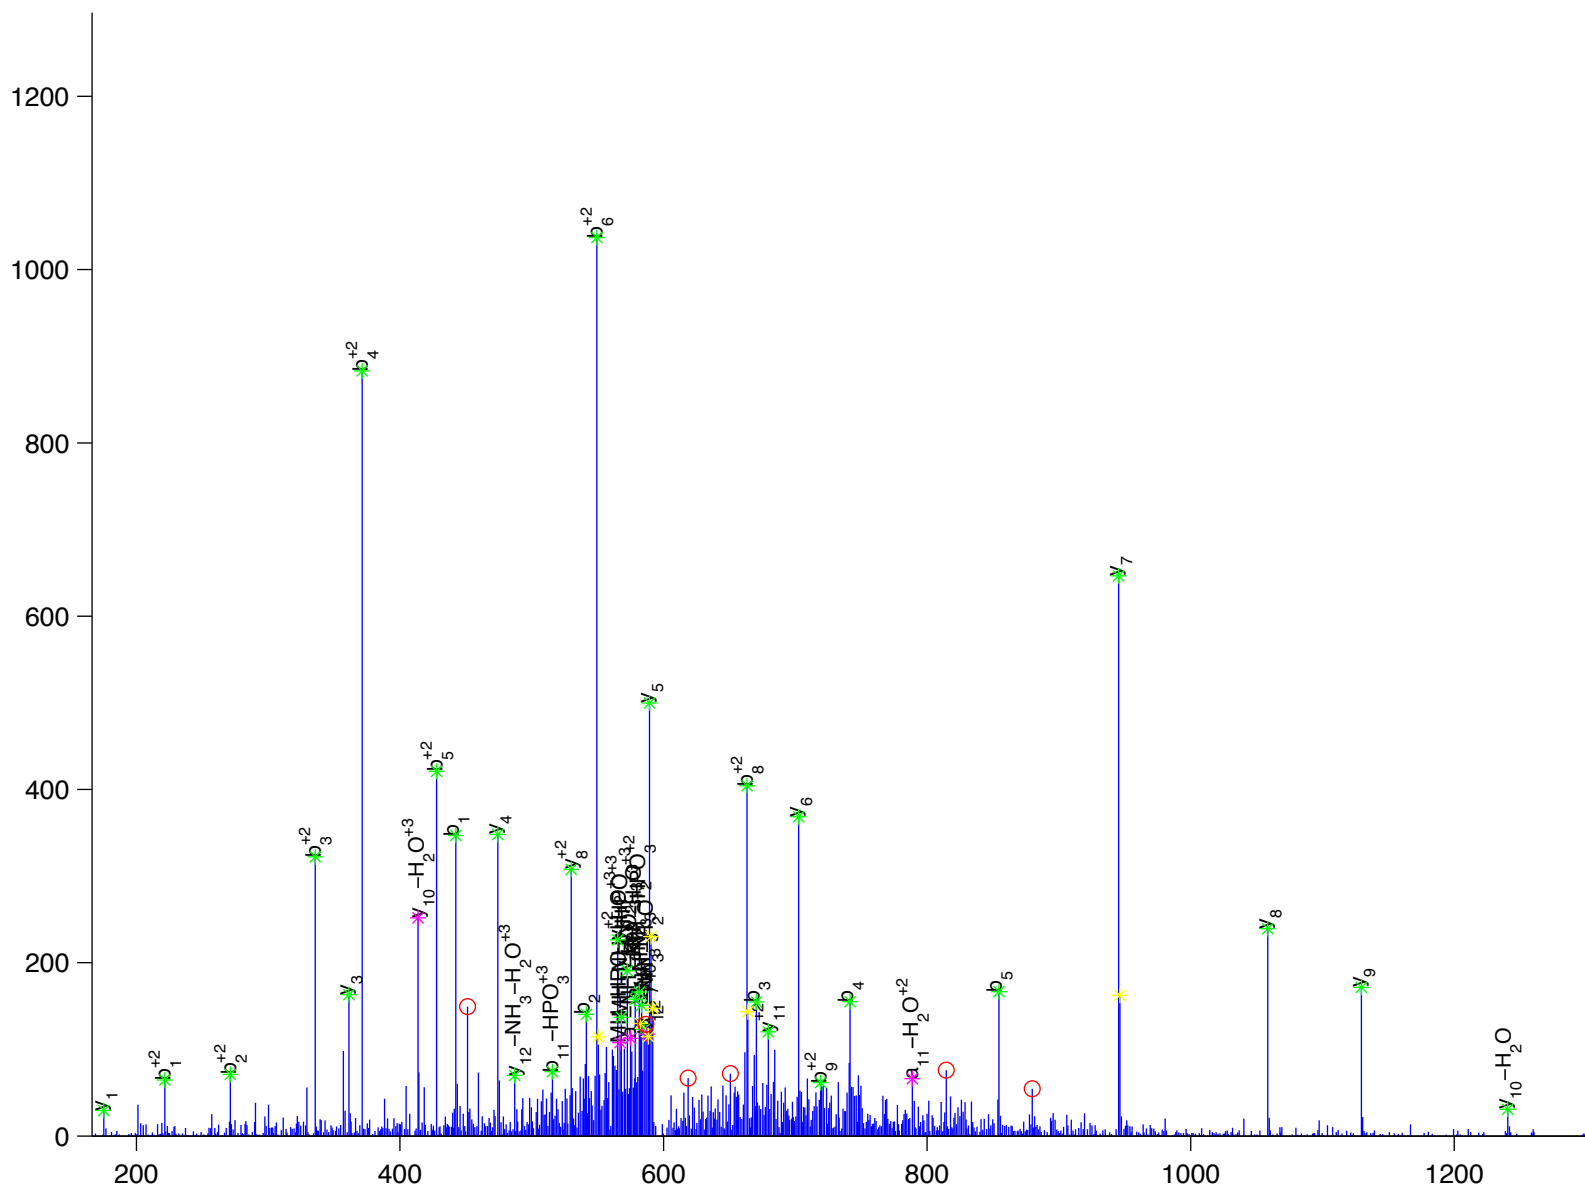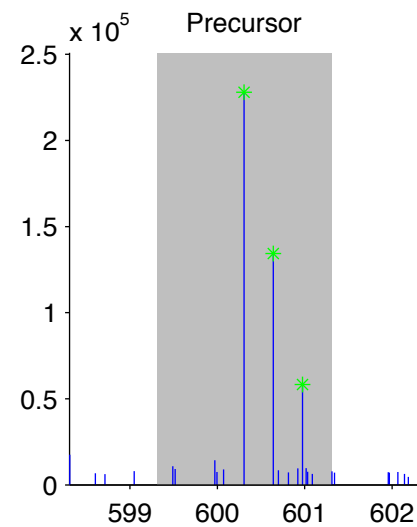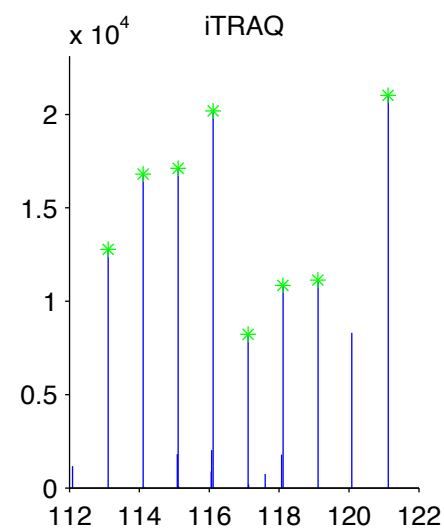

I [A] L y [E] T [P] T [G] W [K]

phosphoglucomutase 2

Charge State: +3

Scan Number: 6848

File Name: 091130ptp1blivers\_hfd\_basal2.raw

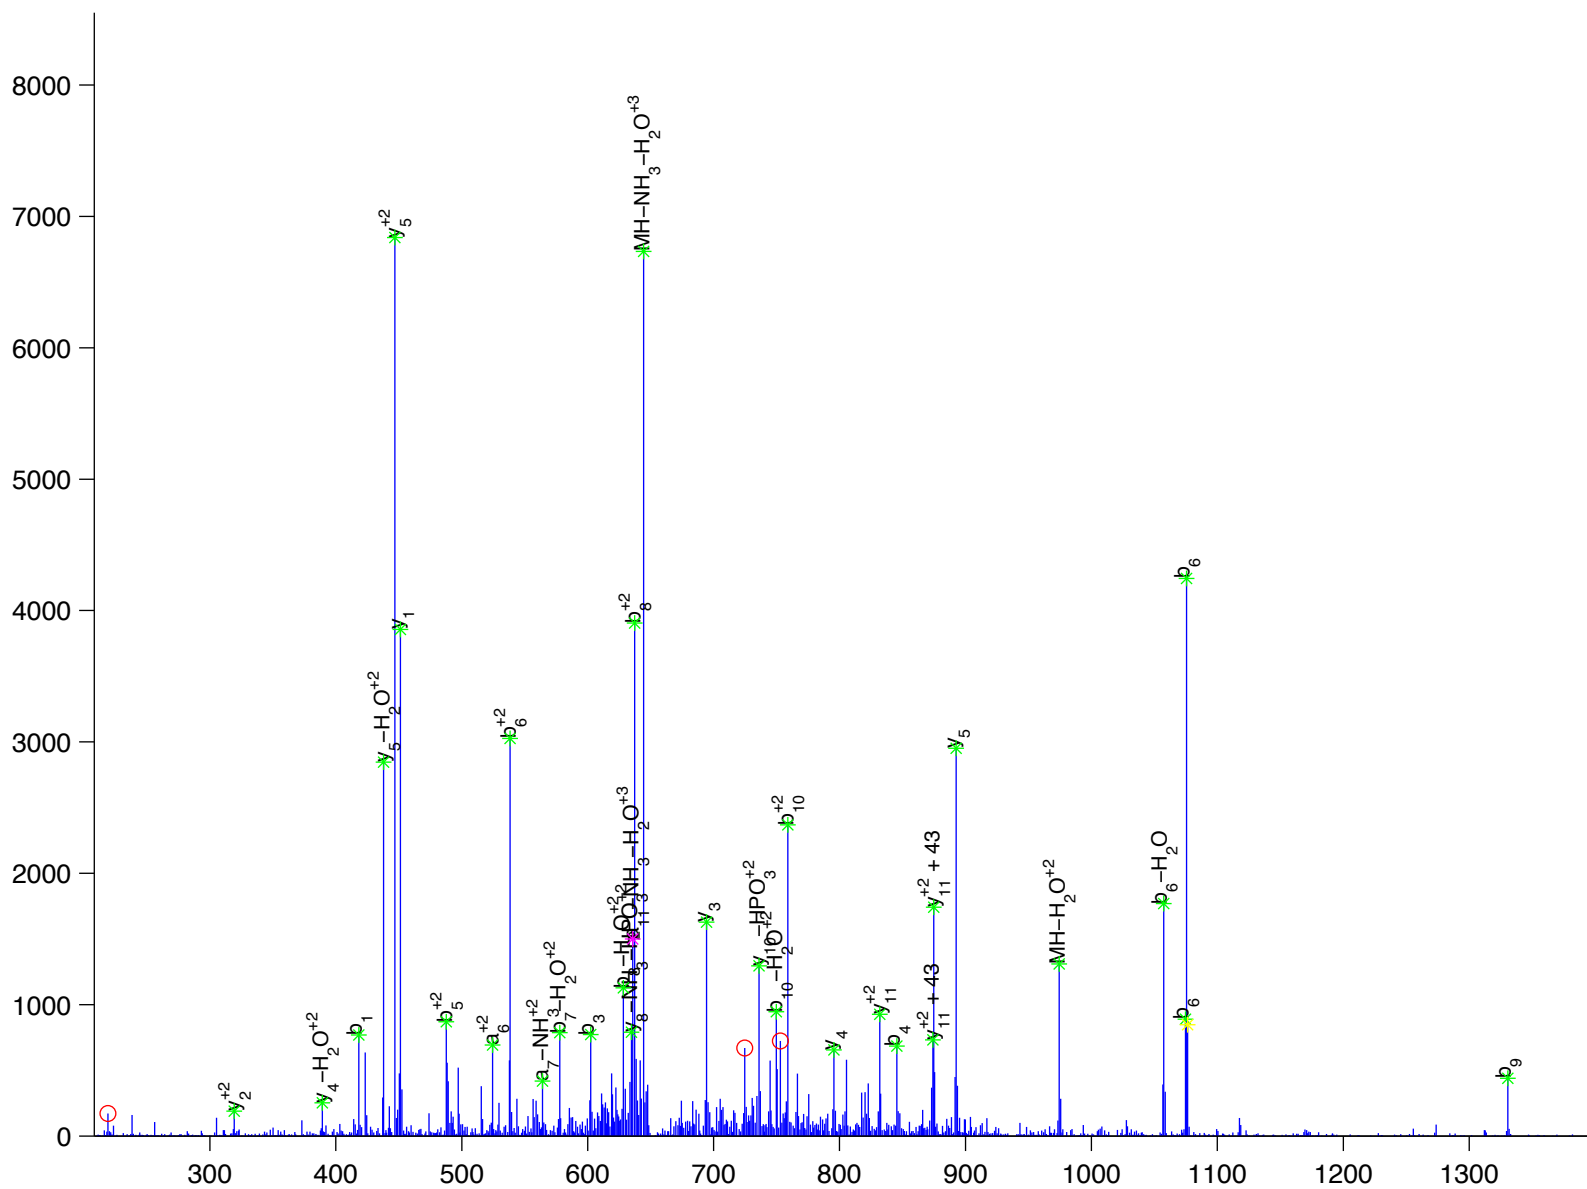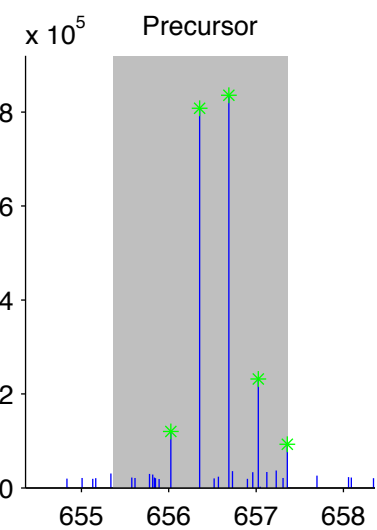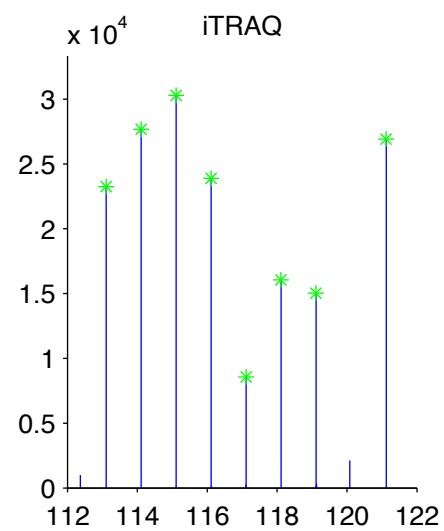

E  
[ L ]  
[ N ] y  
[ F ]  
[ A ]  
K

phosphoglycerate kinase 1

Charge State: +3

Scan Number: 5823

File Name: 091130ptp1blivers\_hfd\_basal2.raw

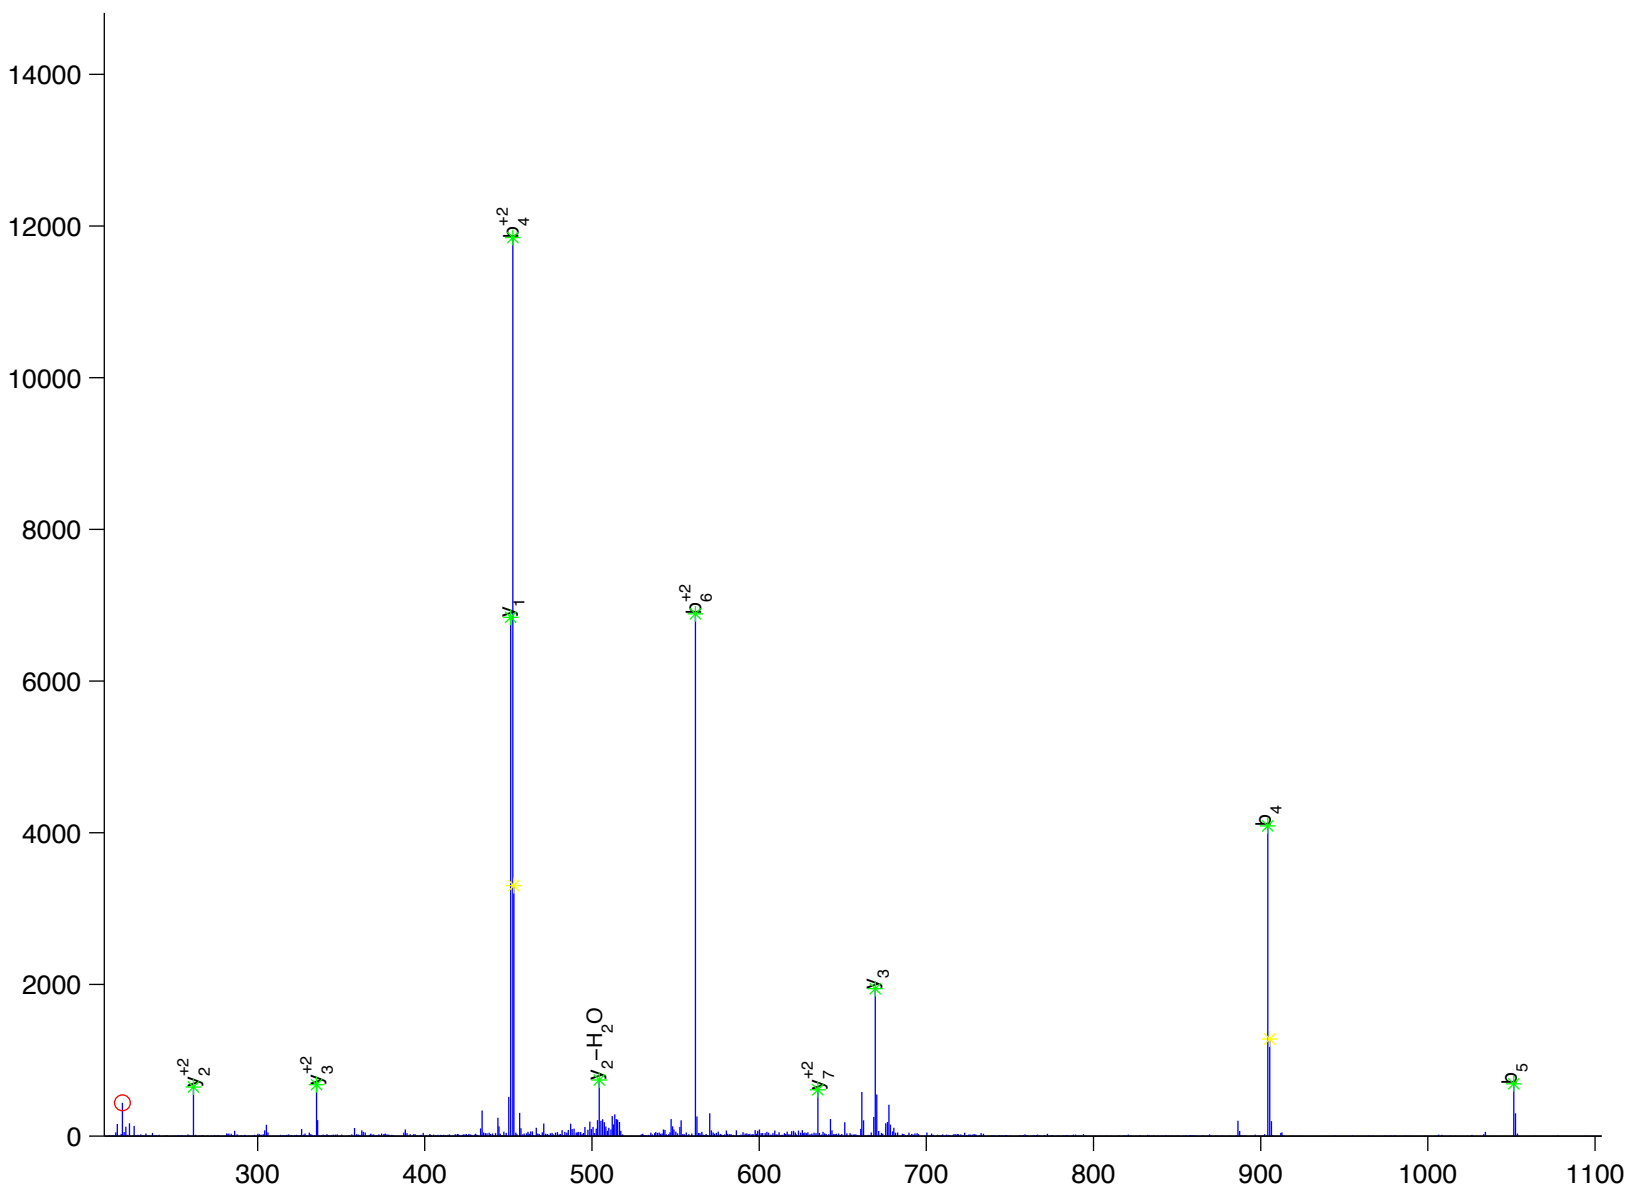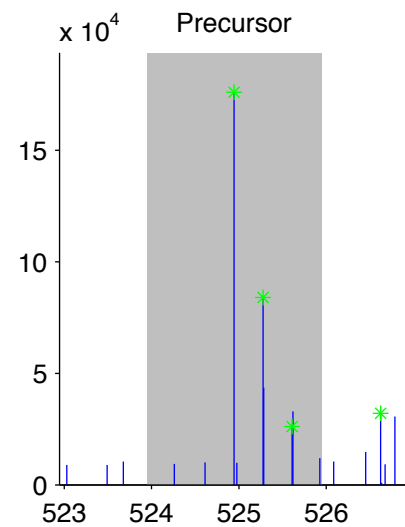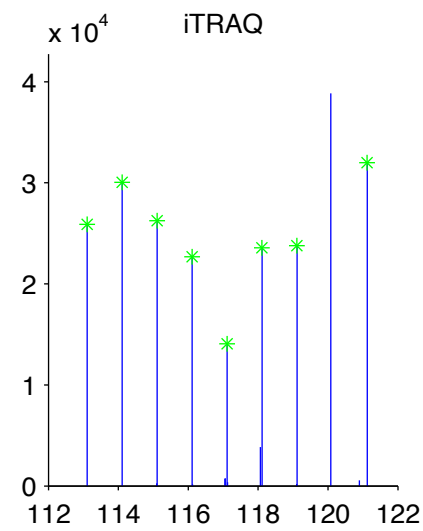

H<sup>+</sup> y<sup>+</sup> G<sup>+</sup> G<sup>+</sup> L<sup>+</sup> T<sup>+</sup> G<sup>+</sup> L<sup>+</sup> N<sup>+</sup> K<sup>+</sup>

phosphoglycerate mutase 2

Charge State: +3

Scan Number: 4393

File Name: 091130ptp1blivers\_hfd\_basal2.raw

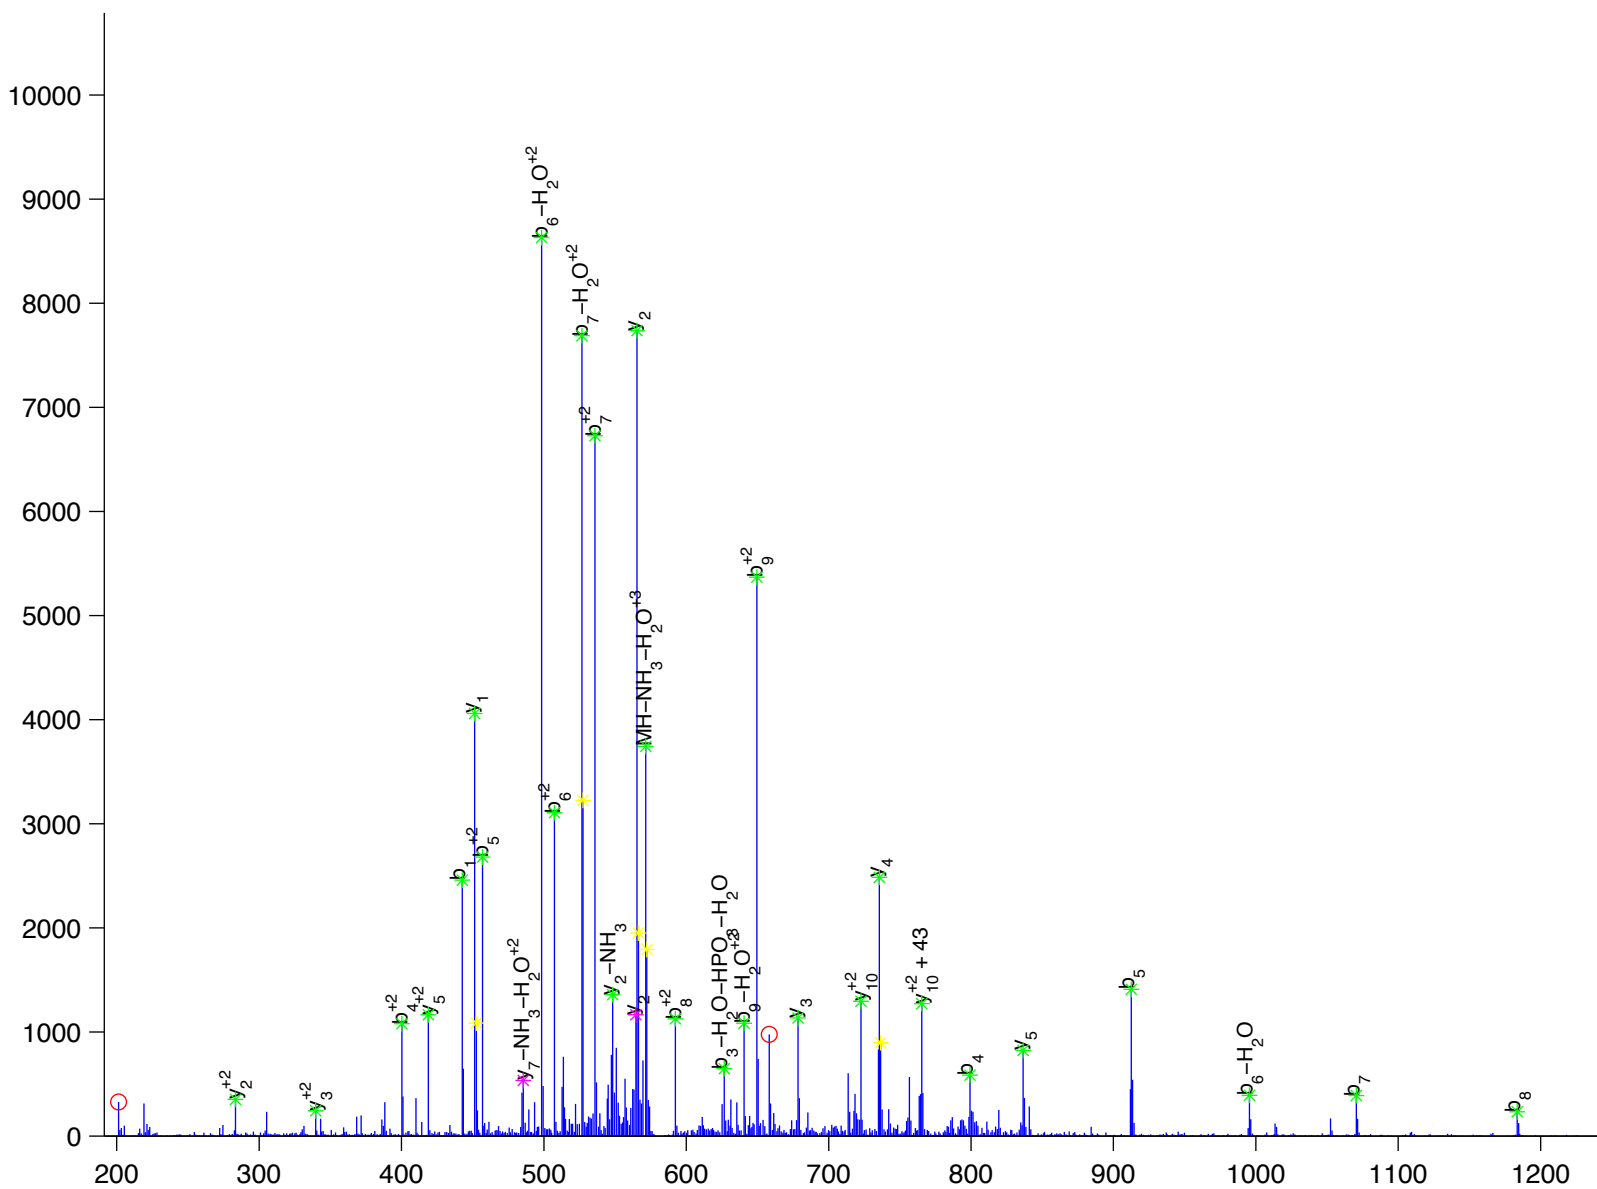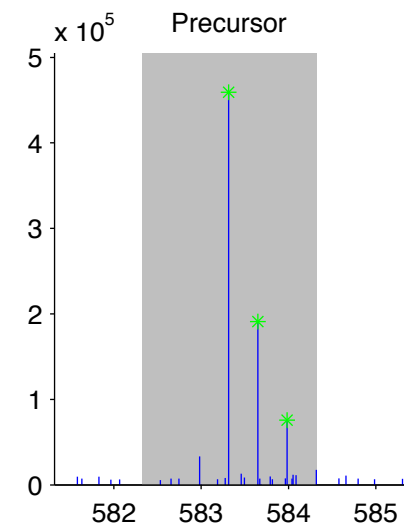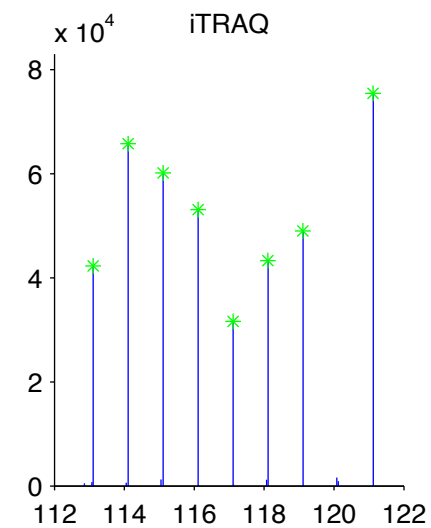

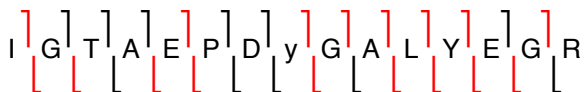

phospholipase C, gamma 1

Charge State: +3

Scan Number: 5569

File Name: 090806ptp1blivers\_M\_NC2.raw

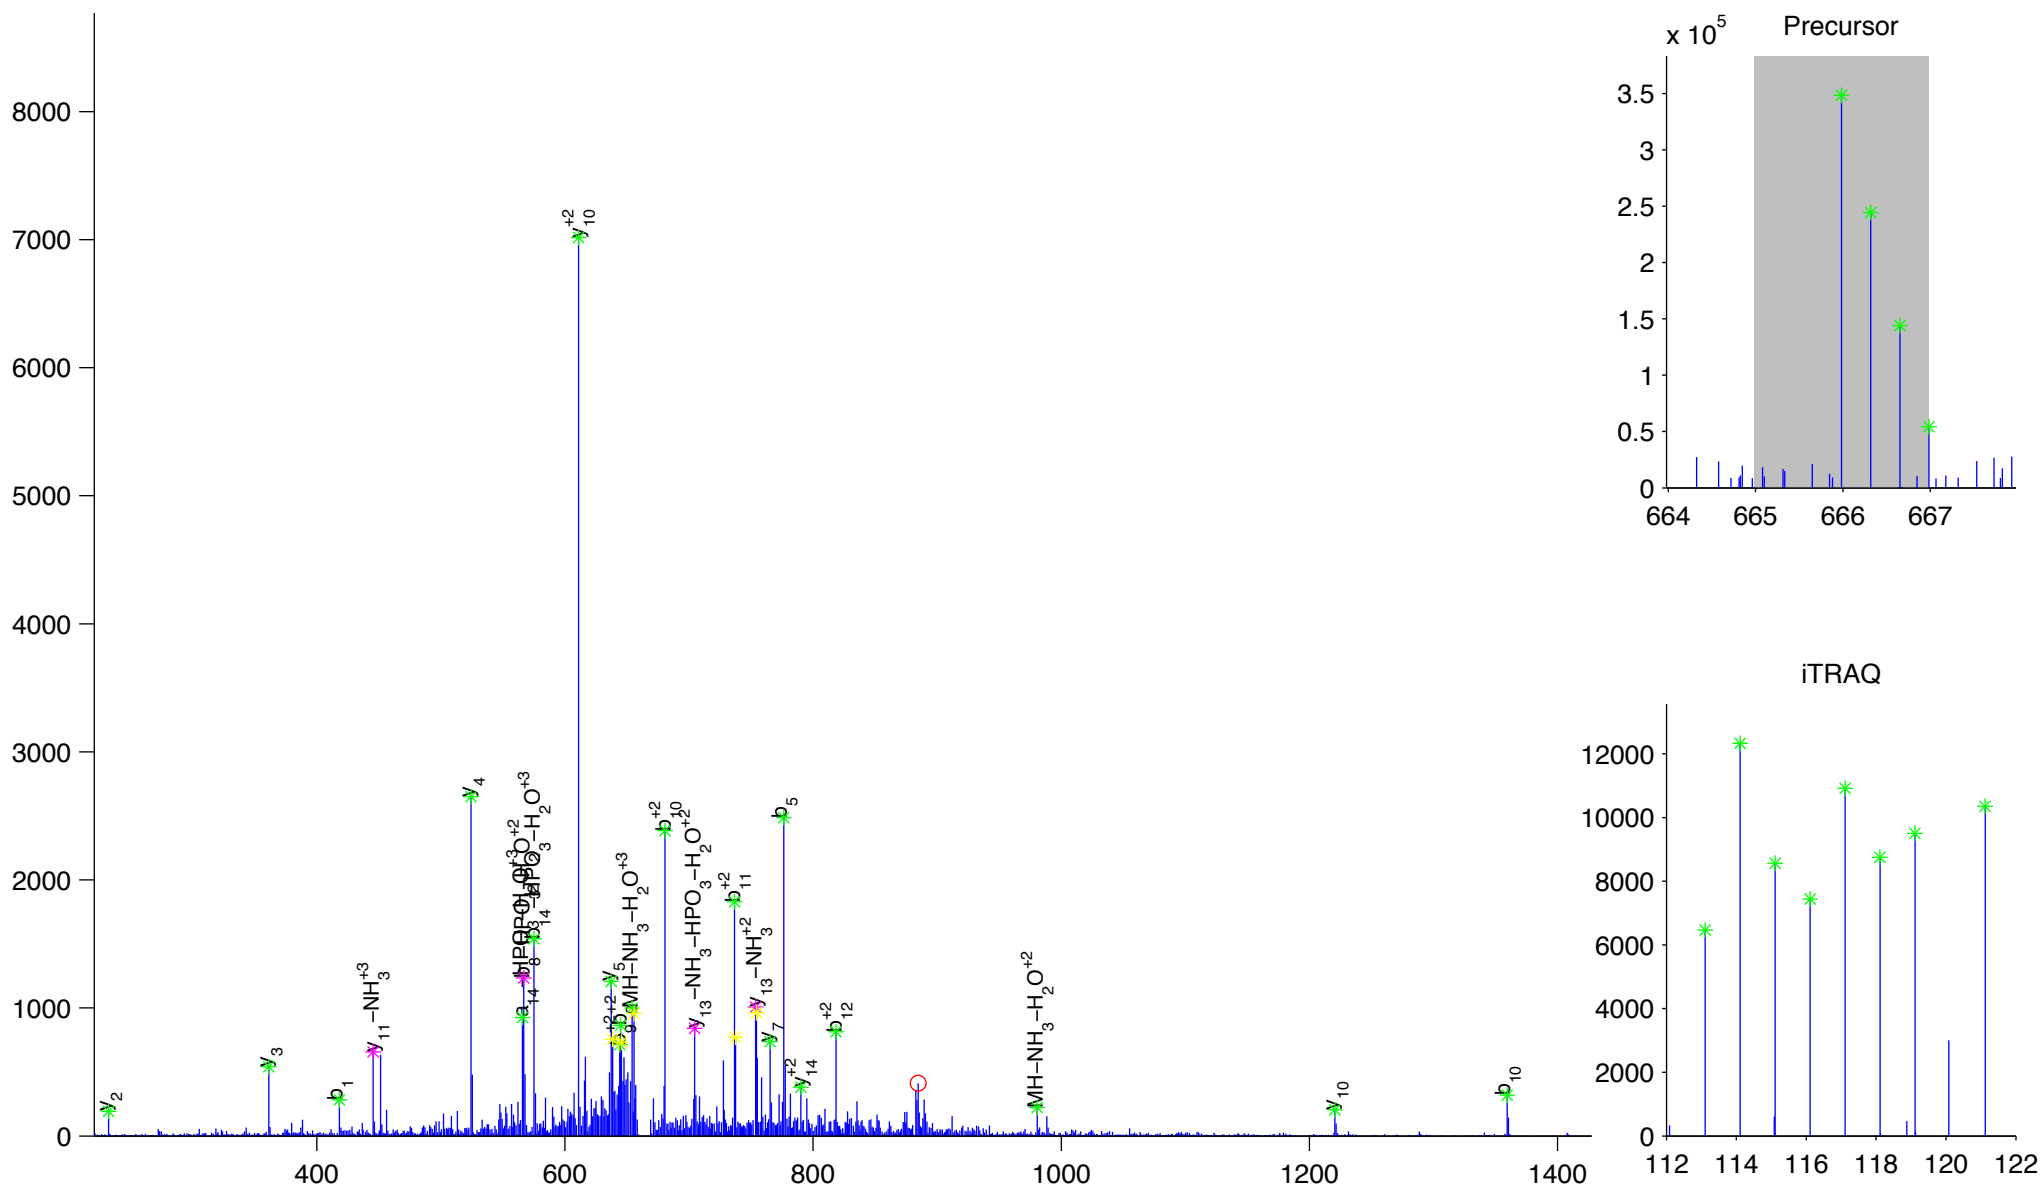

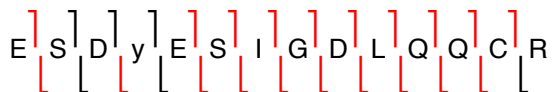

phosphoprotein associated with glycosphingolipid microdomains 1

Charge State: +3

Scan Number: 4058

File Name: 100905ptp1blivers\_ncHFD\_basal.raw

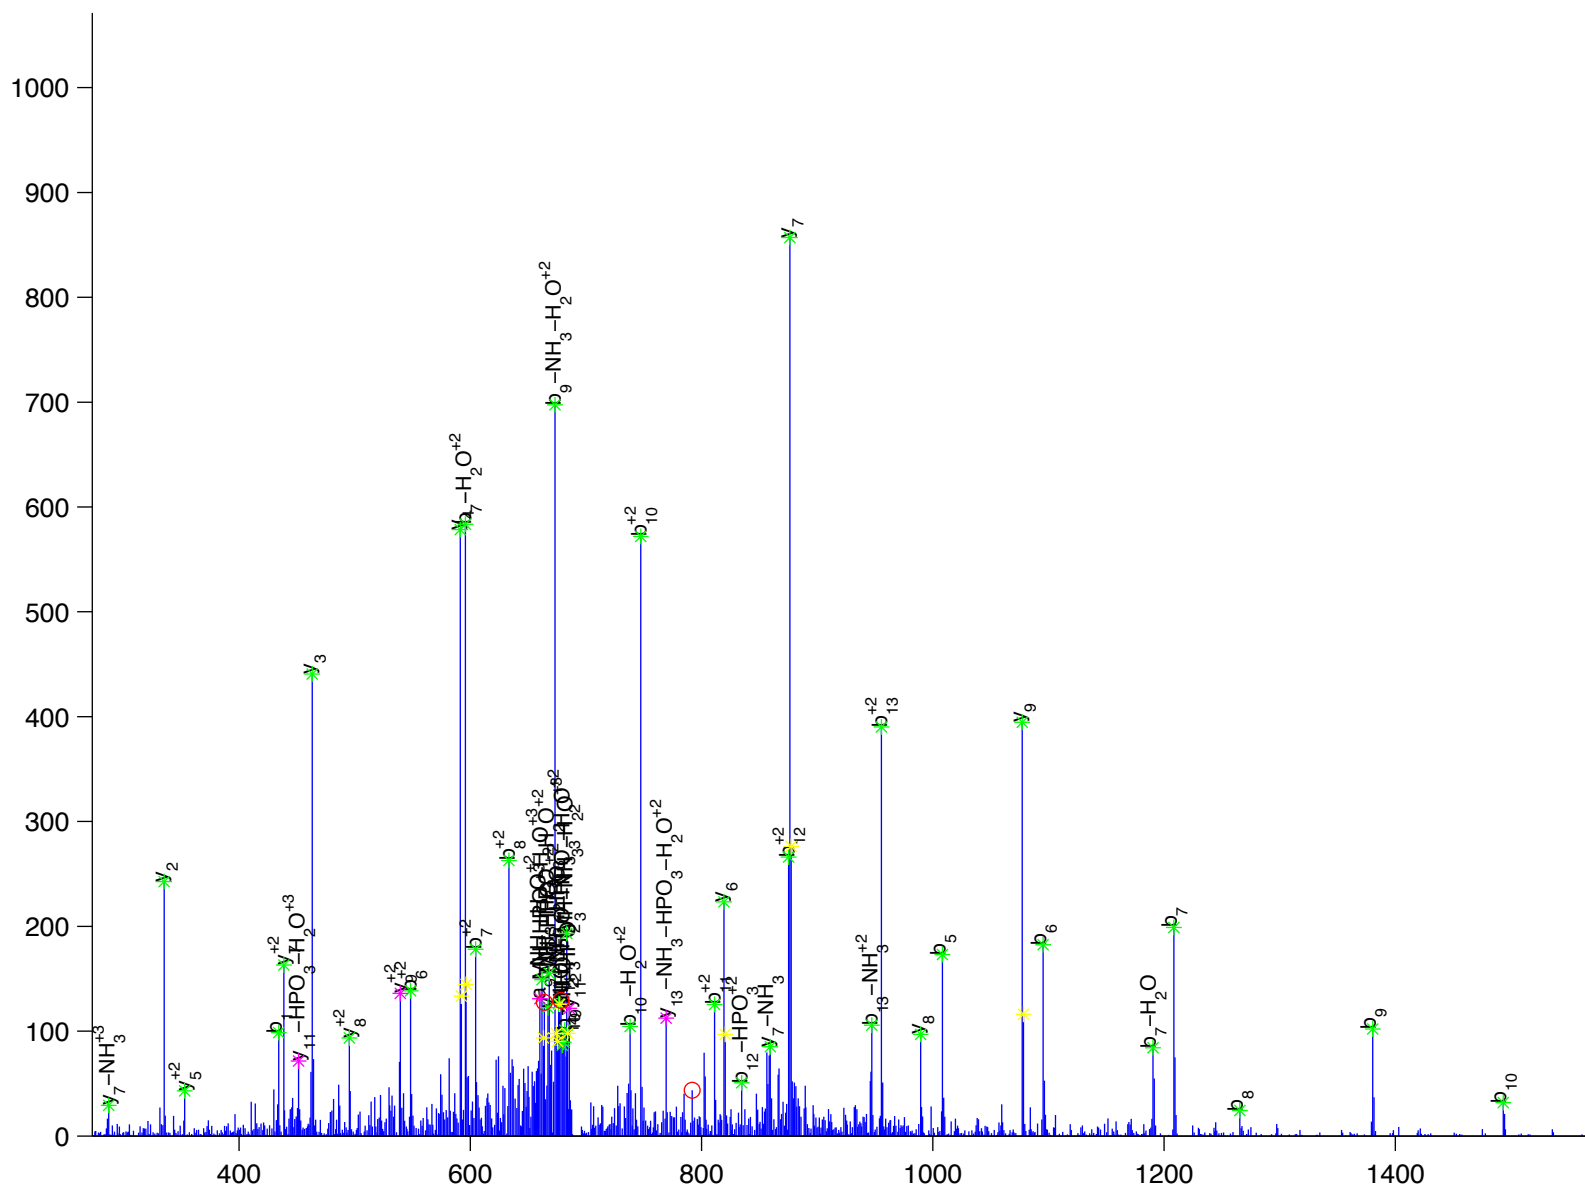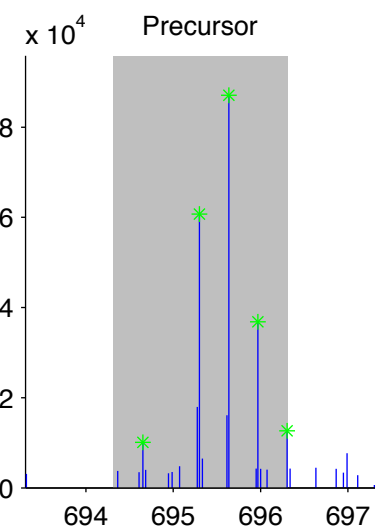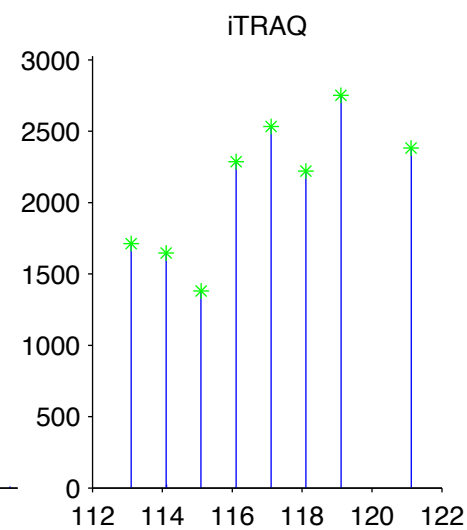

Q[G]I[D]H[E]y[L]S[S]V[D]L]K

pipecolic acid oxidase

Charge State: +4

Scan Number: 5509

File Name: 100908ptp1blivers\_ncHFD3\_basal.raw

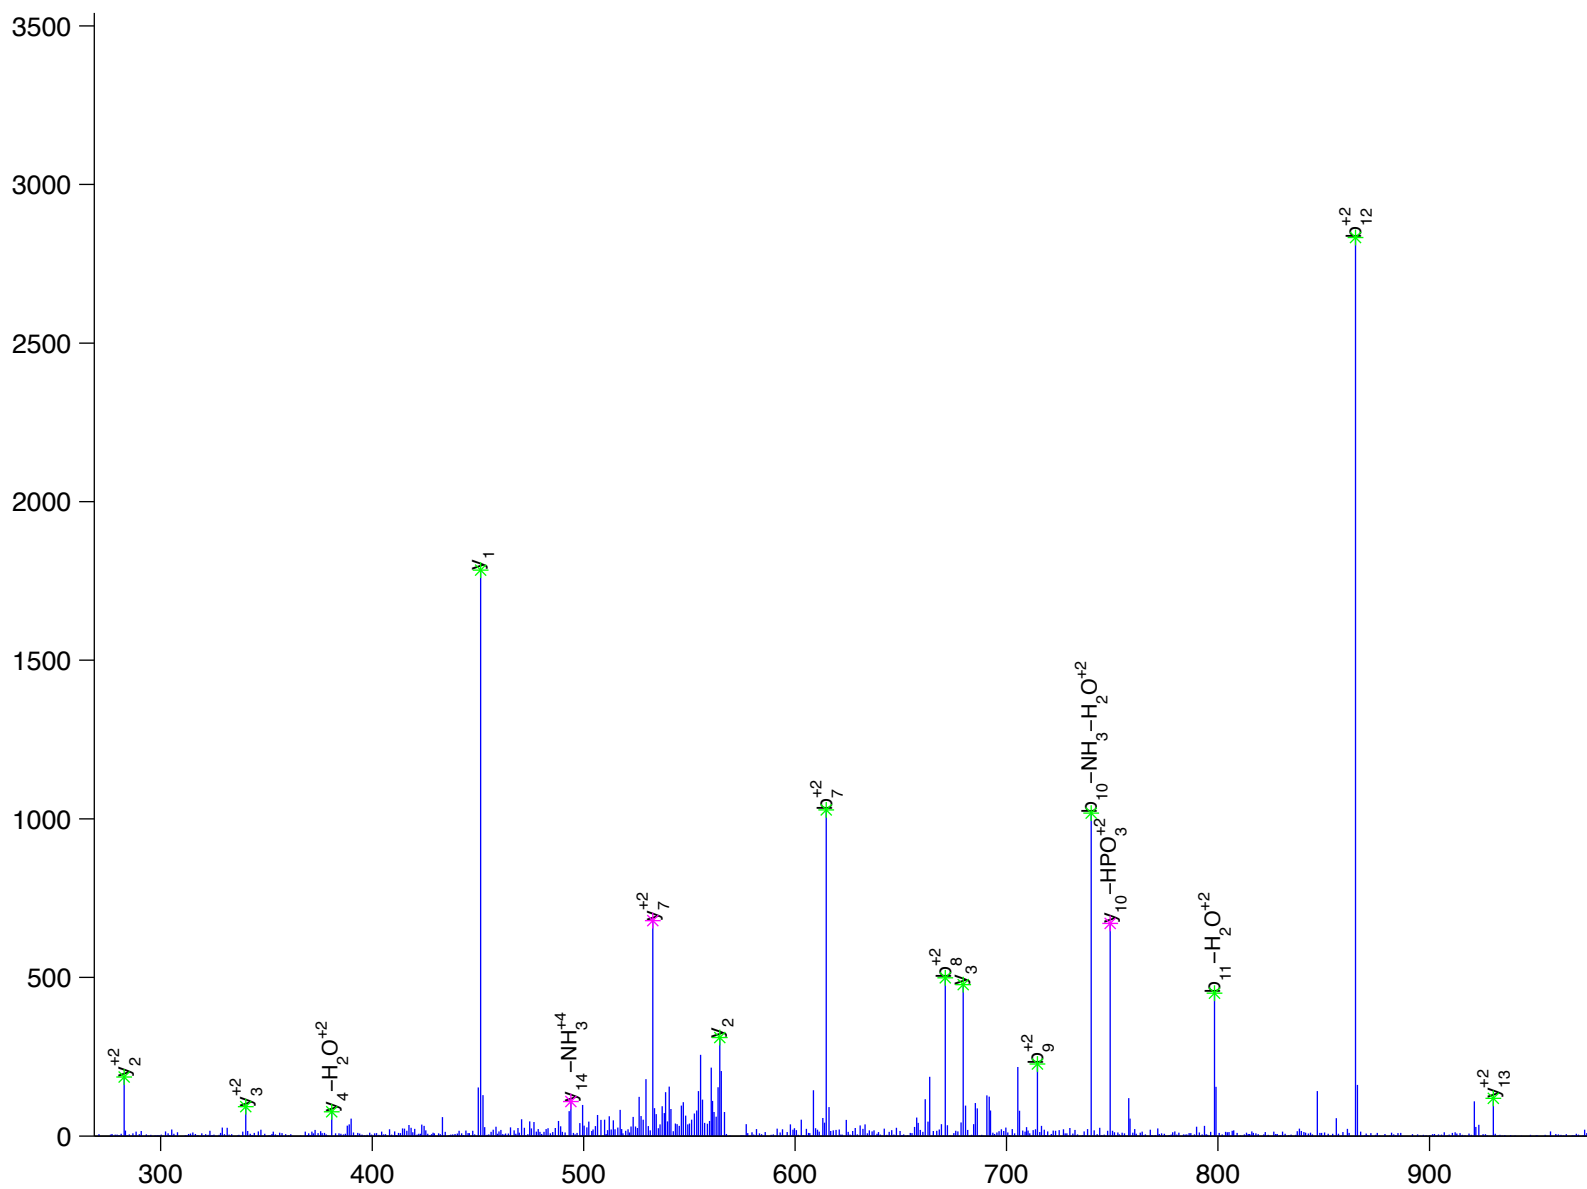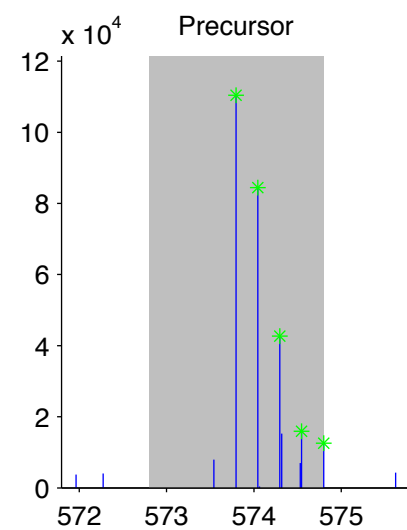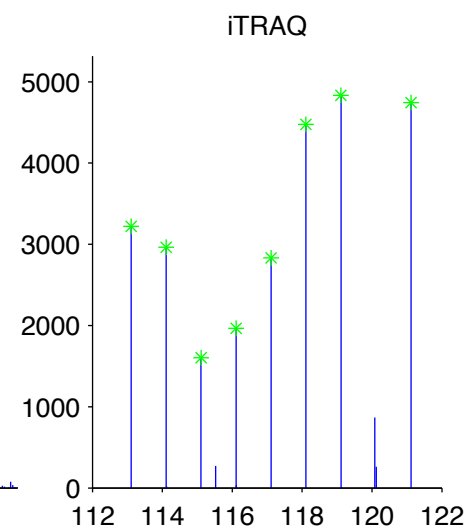

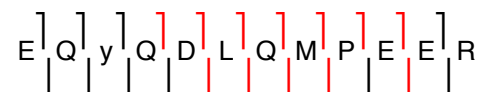

plakophilin 2

Charge State: +3

Scan Number: 3304

File Name: 100827ptp1blivers\_ncHFD\_basal.raw

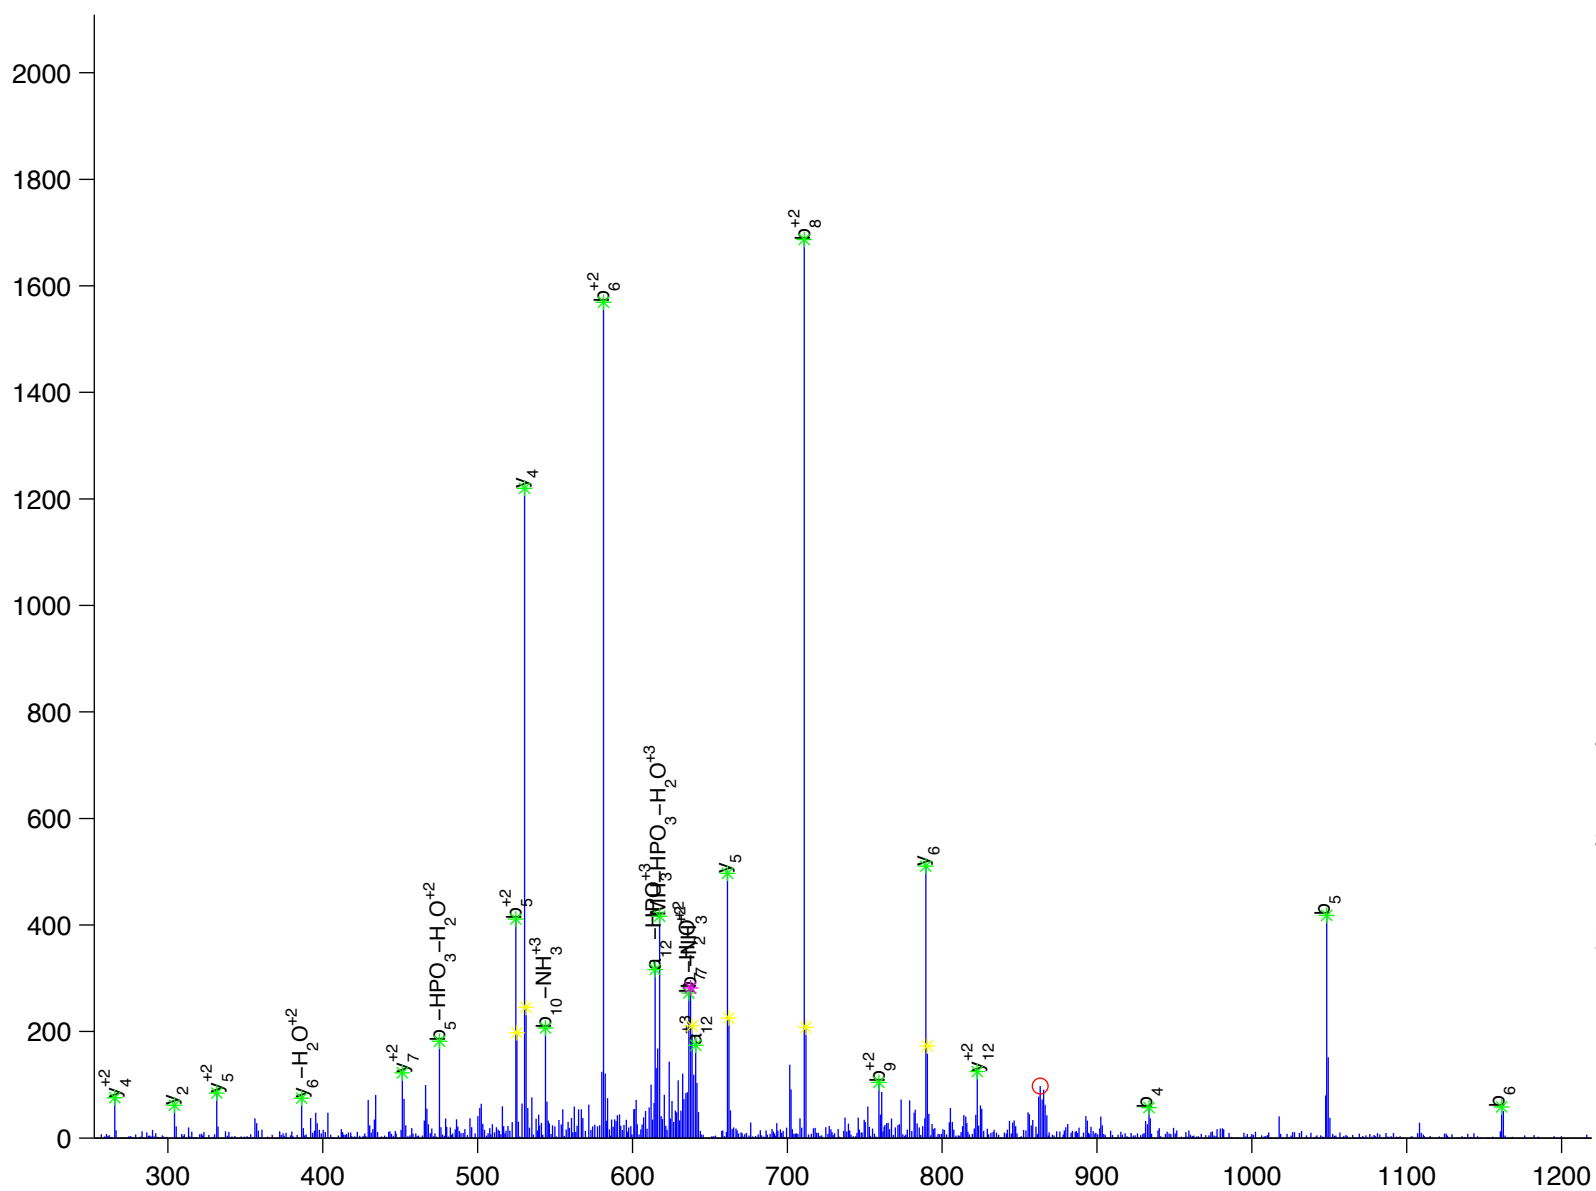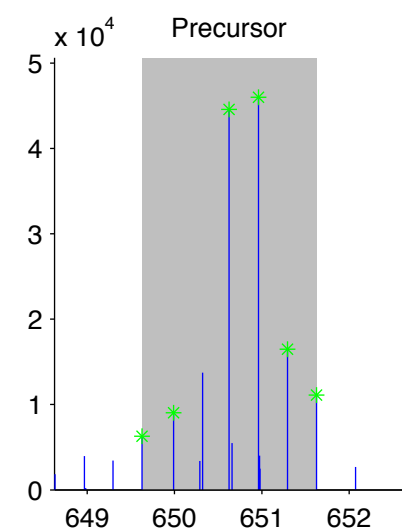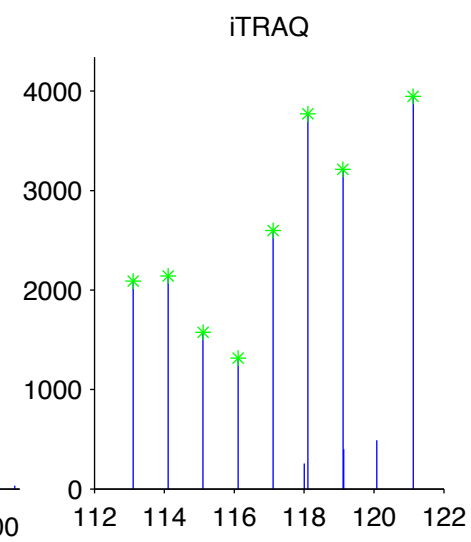



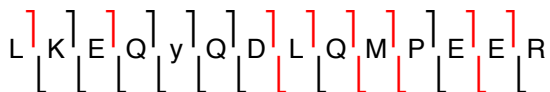

plakophilin 2

Charge State: +3

Scan Number: 5088

File Name: 091130ptp1blivers\_hfd\_basal2.raw

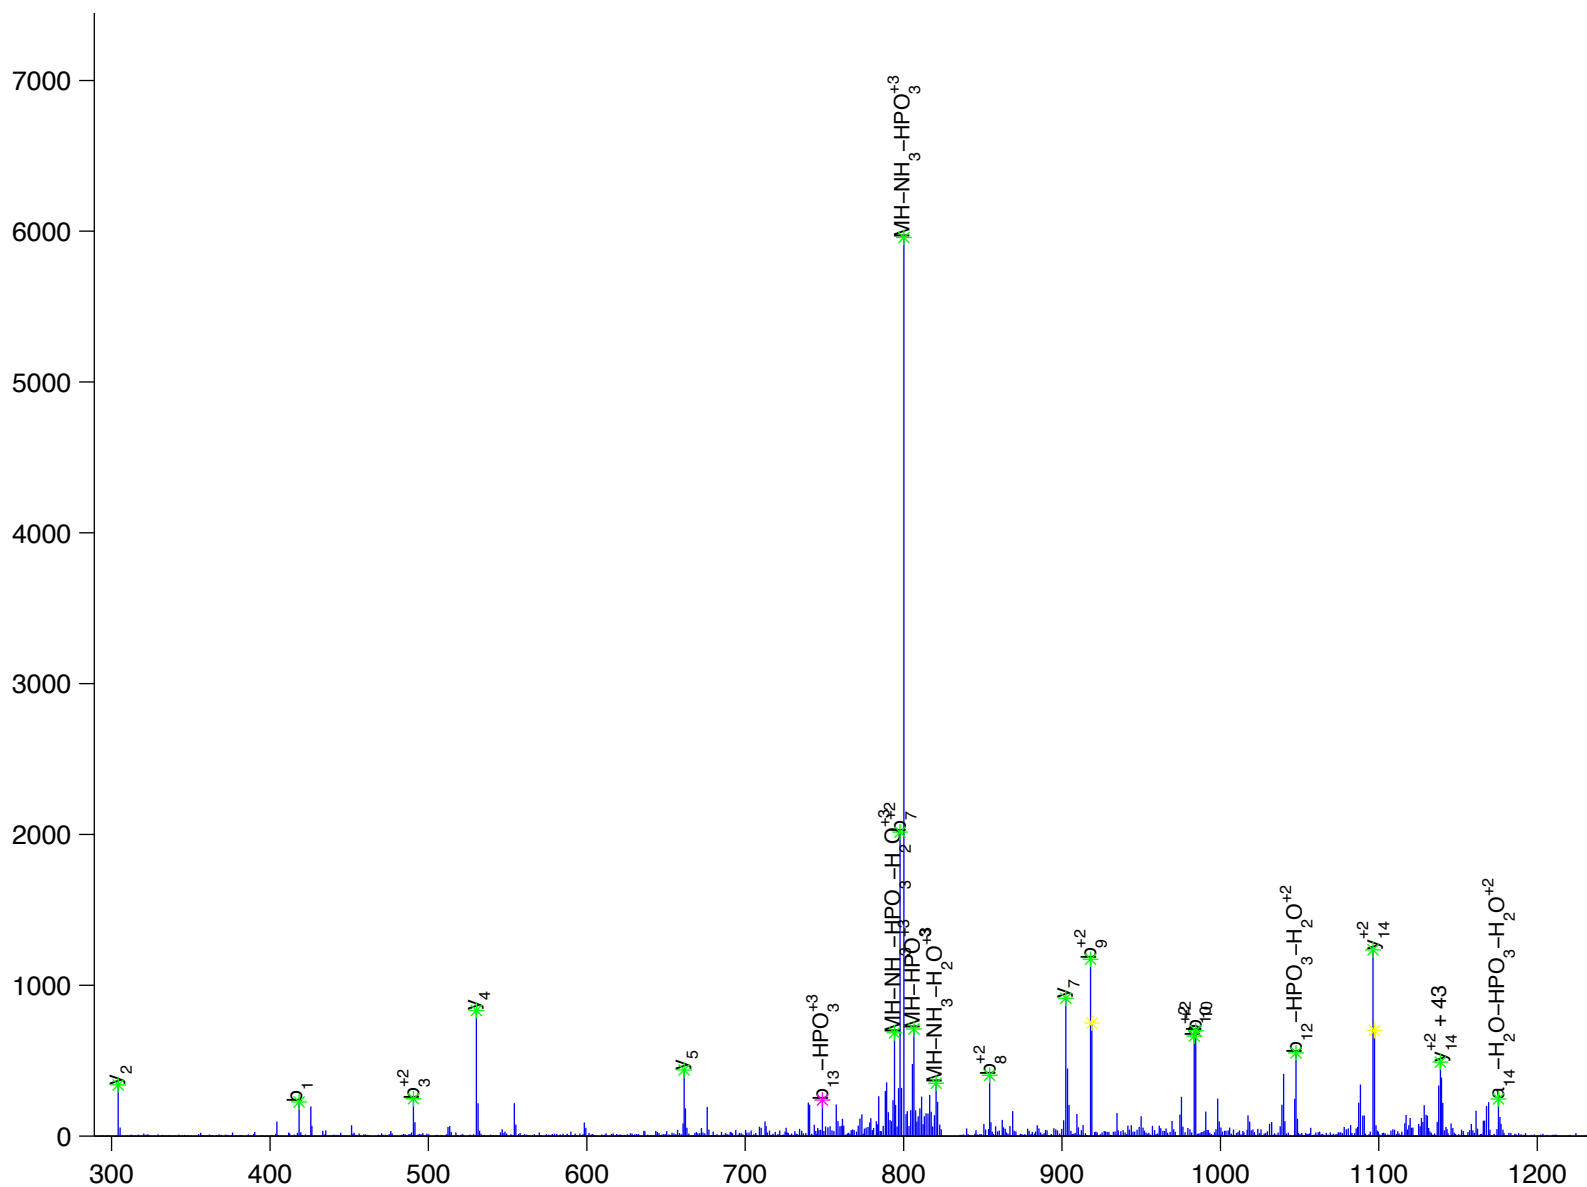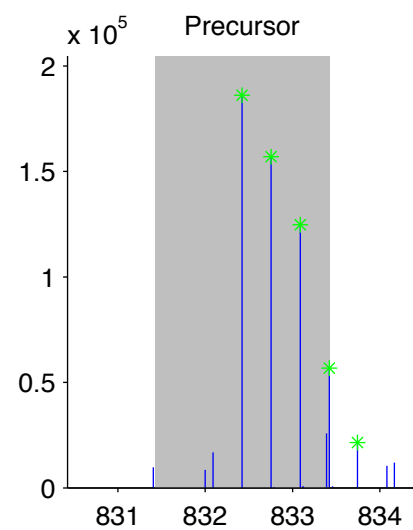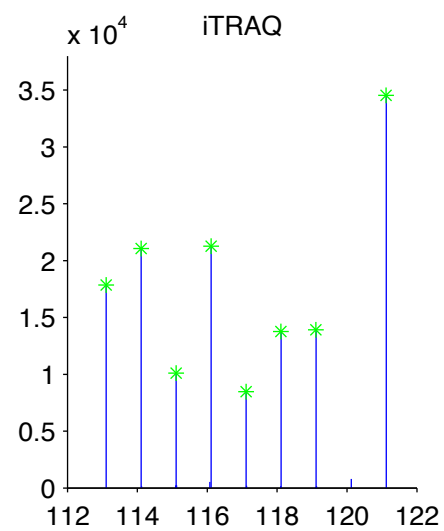

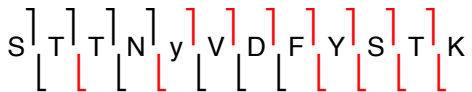

plakophilin 4 isoform 1

Charge State: +3

Scan Number: 4214

File Name: 090728ptp1blivers\_M\_NC\_ins\_e.raw

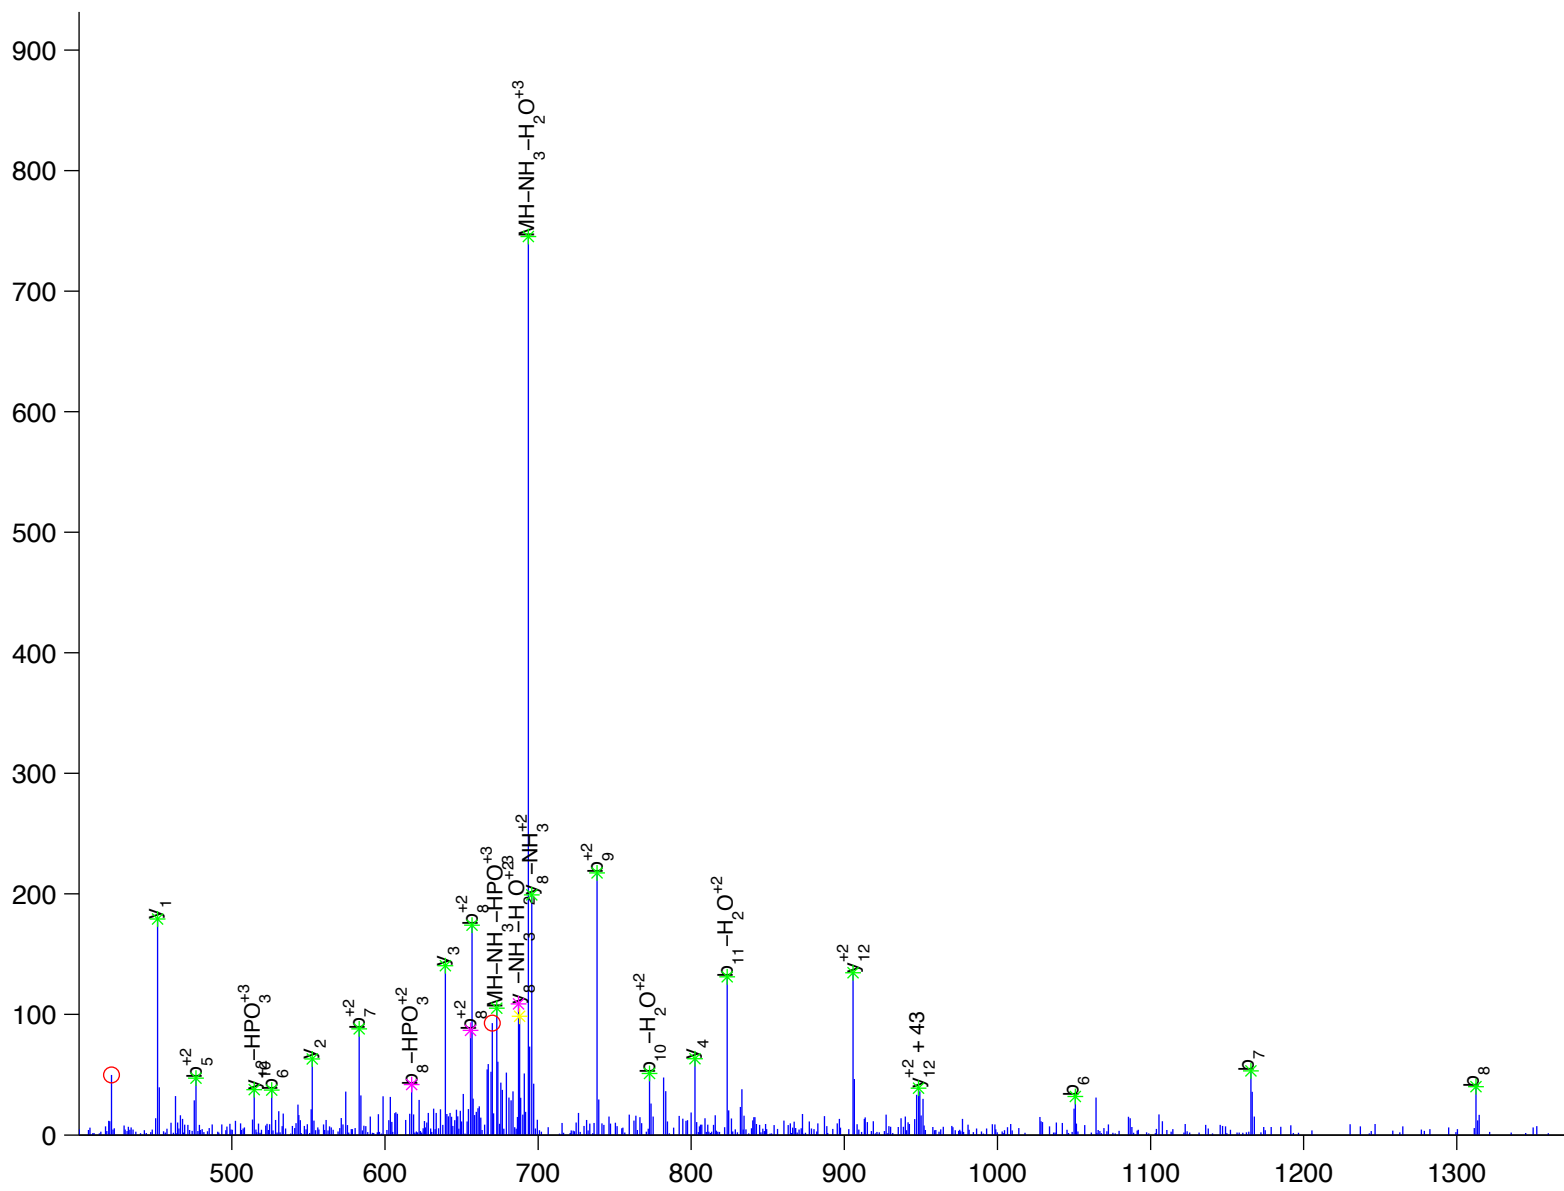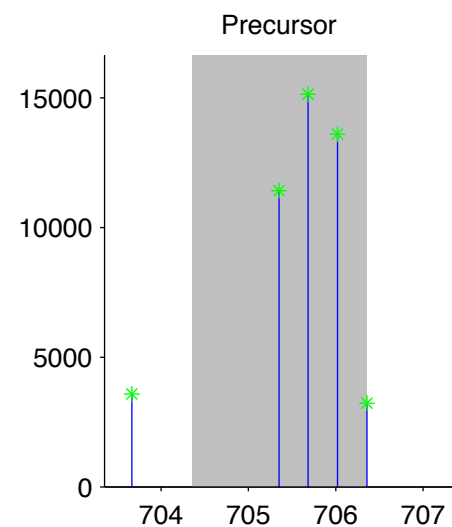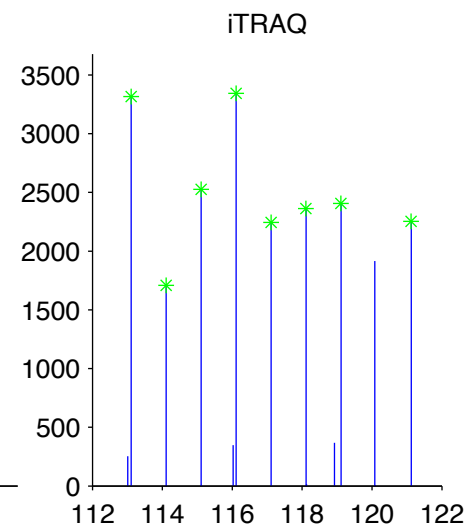

N [ N ] y [ A ] L [ N ] T [ A ] A [ T ] Y [ A ] E [ P ] Y [ R ] P [ V ] Q [ Y ] R

plakophilin 4 isoform 1

Charge State: +3

Scan Number: 5646

File Name: 091130ptp1blivers\_hfd\_basal2.raw

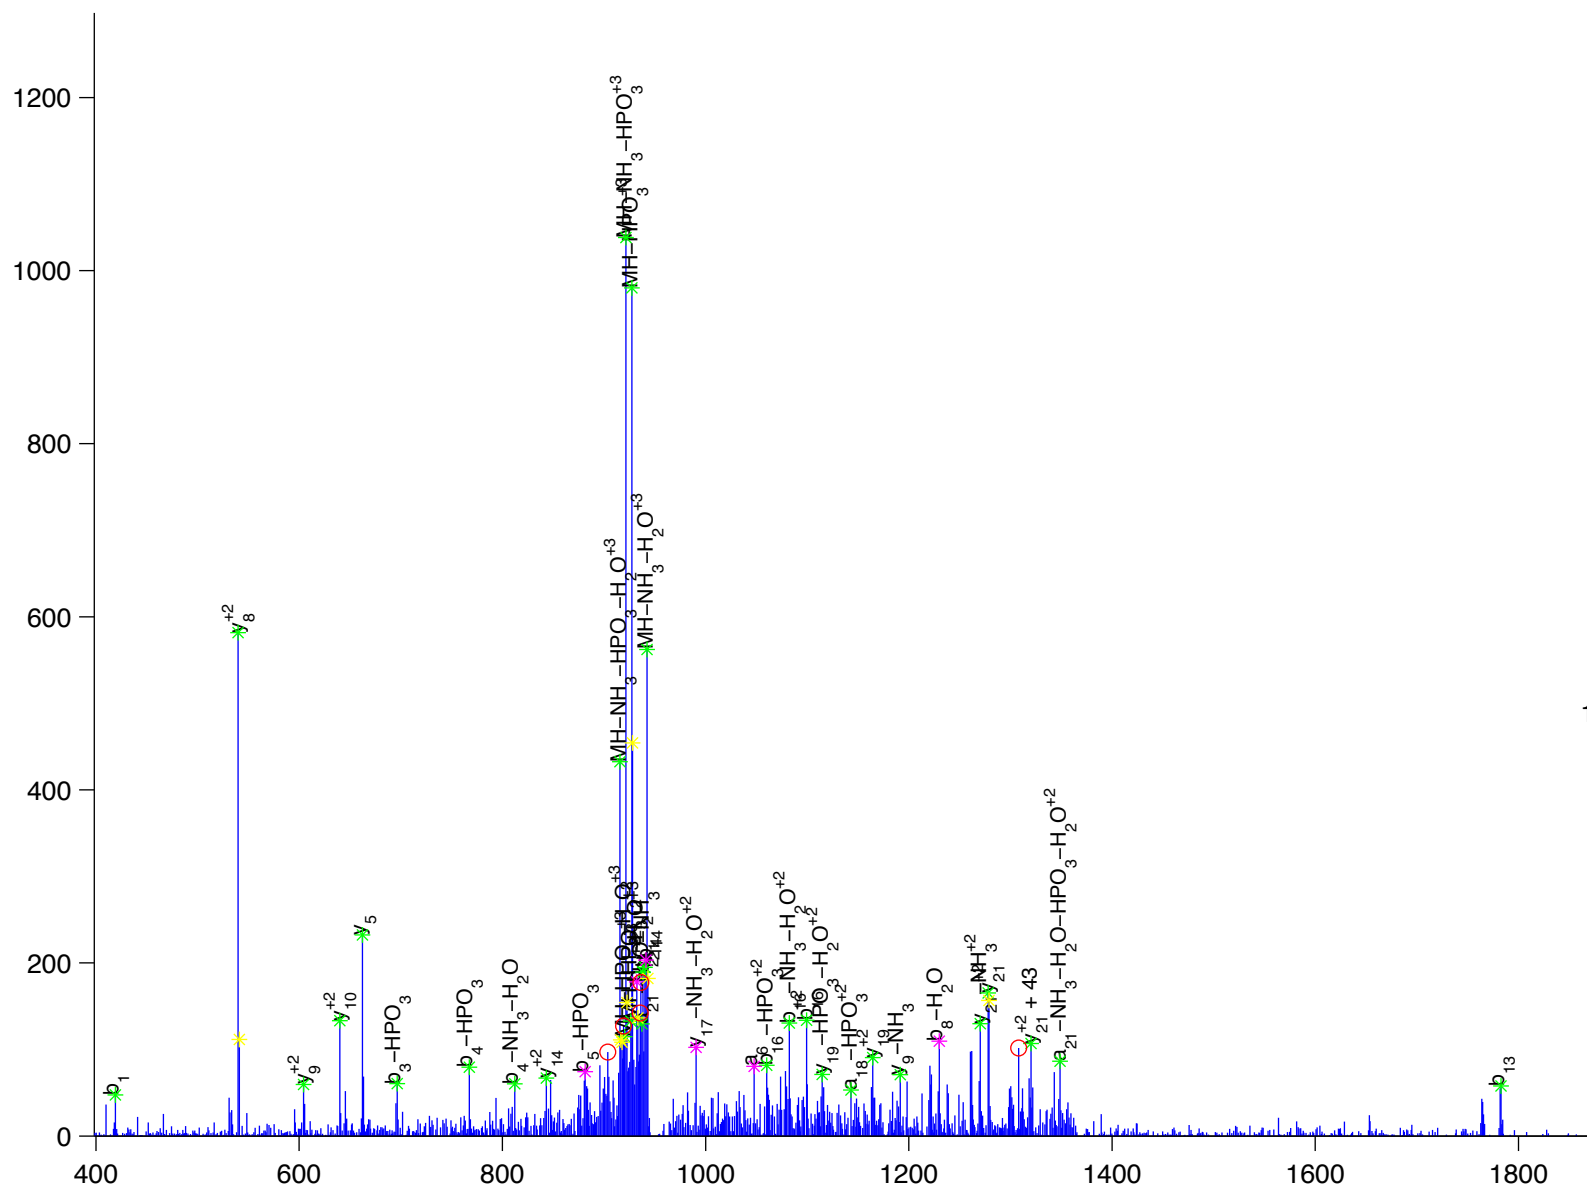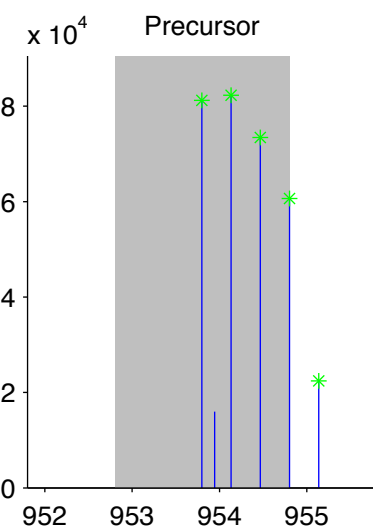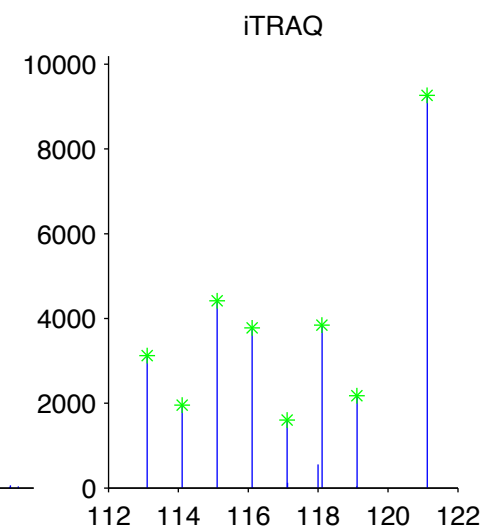

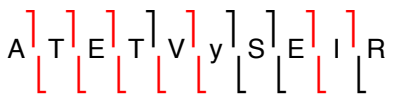

platelet/endothelial cell adhesion molecule 1 isoform 1

Charge State: +2

Scan Number: 4987

File Name: 091130ptp1blivers\_hfd\_basal2.raw

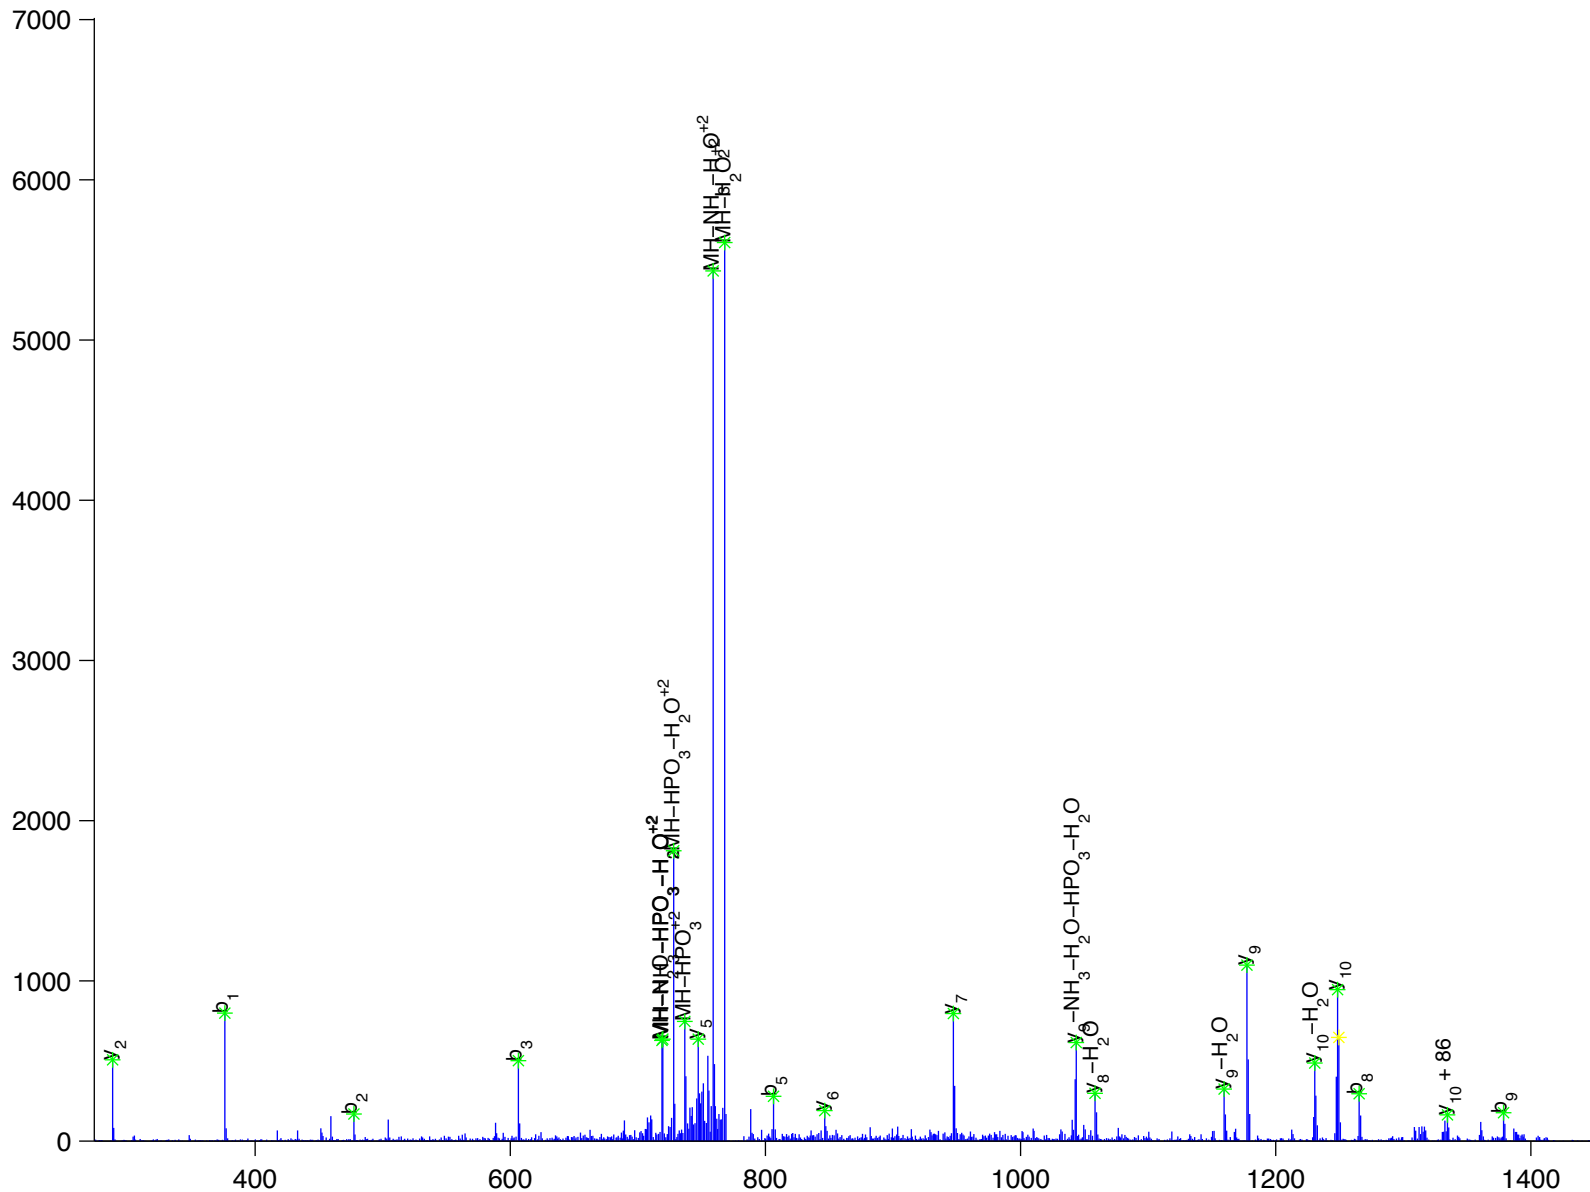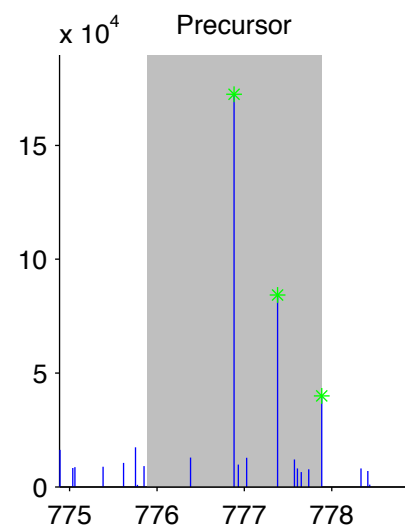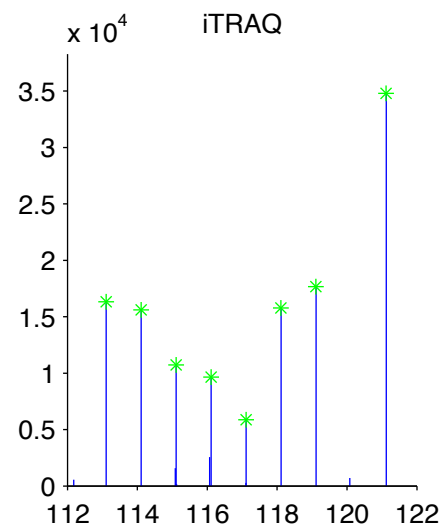

S  
[A]  
[D]  
[D]  
[T]  
y  
[L]  
[Q]  
[L]  
K

pleckstrin homology domain containing, family A member 7

Charge State: +3

Scan Number: 4136

File Name: 100905ptp1blivers\_ncHFD\_basal.raw

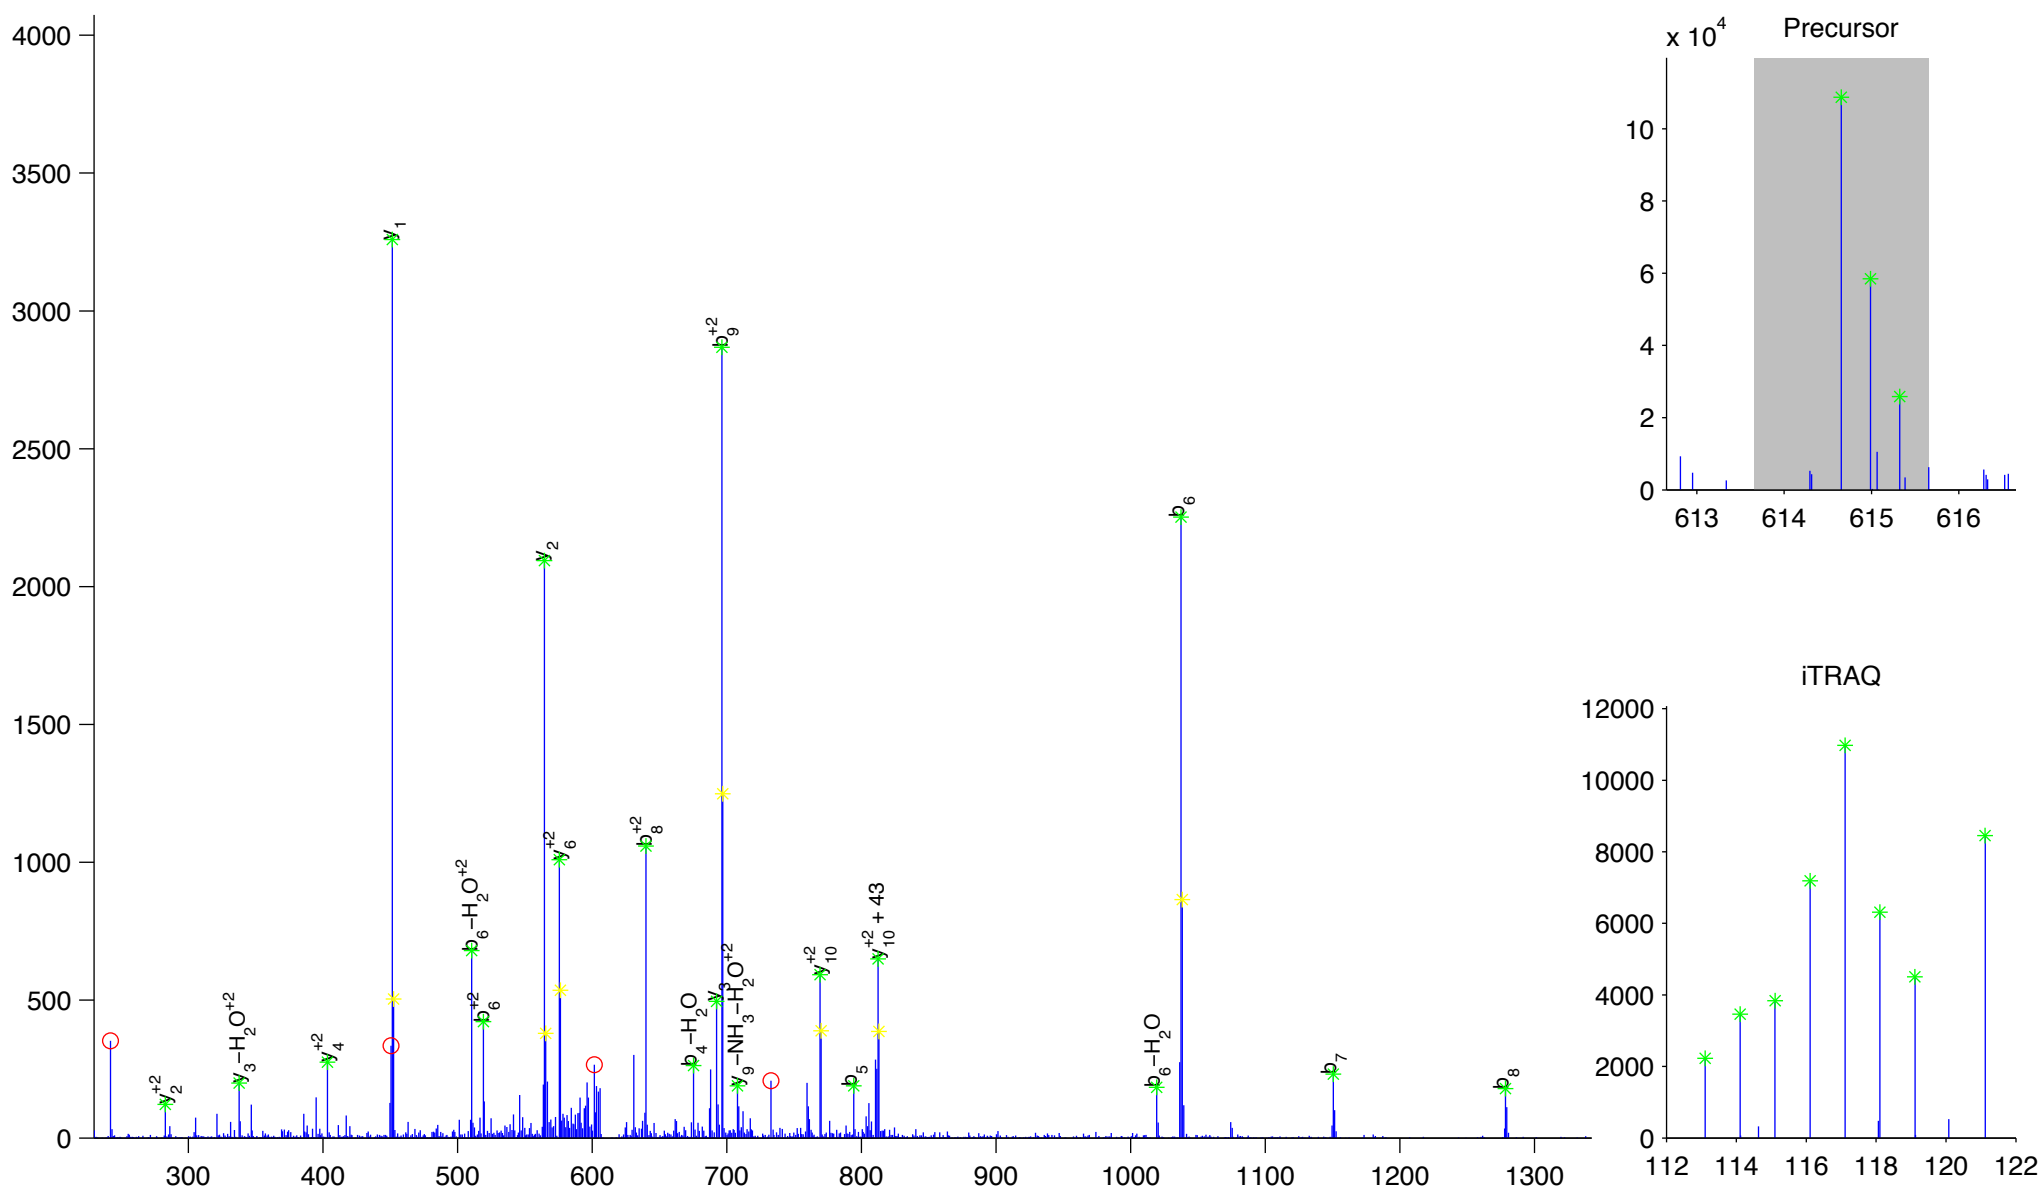

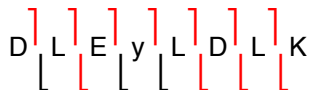

pleckstrin homology domain containing, family A member 7

Charge State: +3

Scan Number: 4854

File Name: 100827ptp1blivers\_ncHFD\_basal.raw

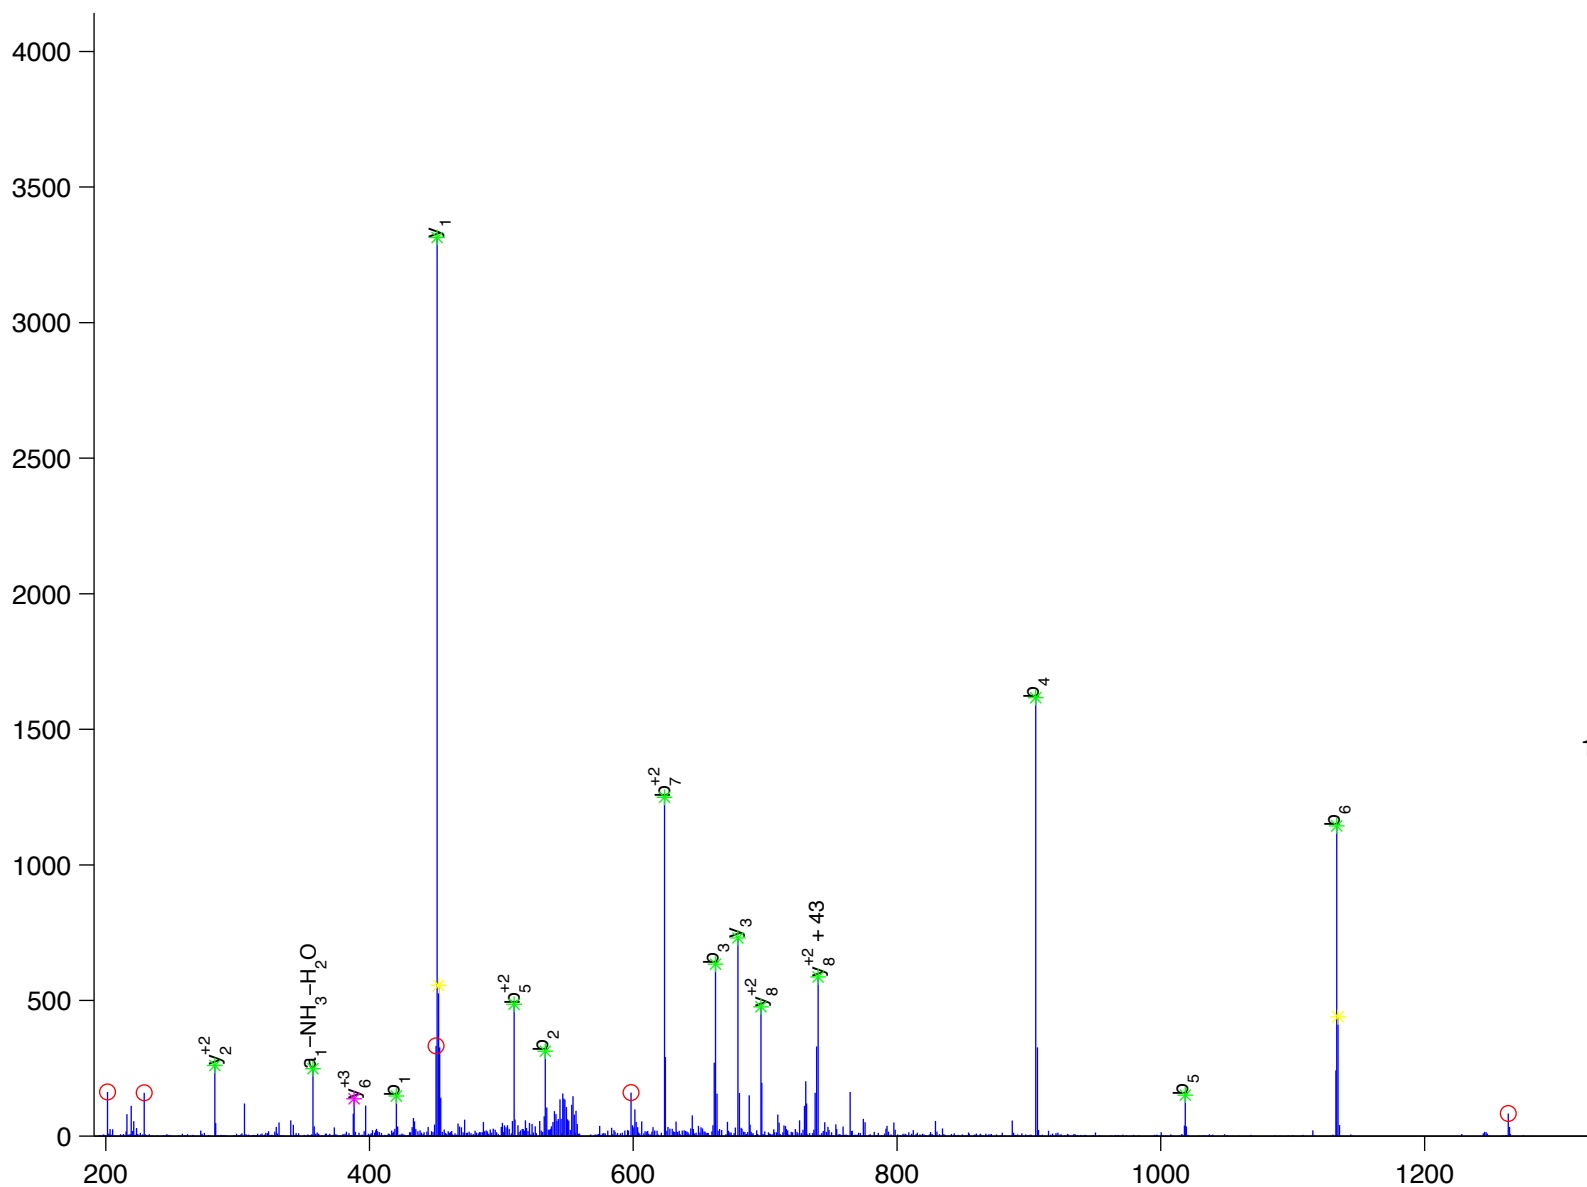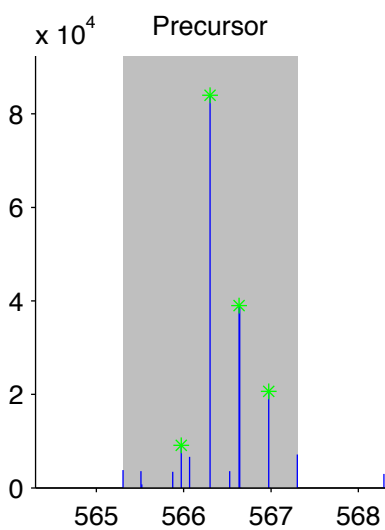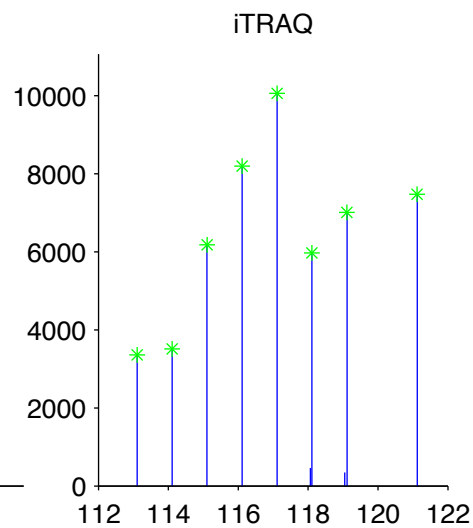



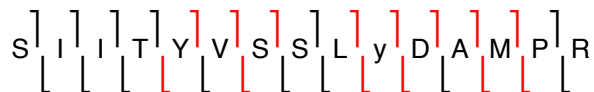

plectin 1 isoform 1

Charge State: +3

Scan Number: 10413

File Name: 090806ptp1blivers\_M\_NC2.raw

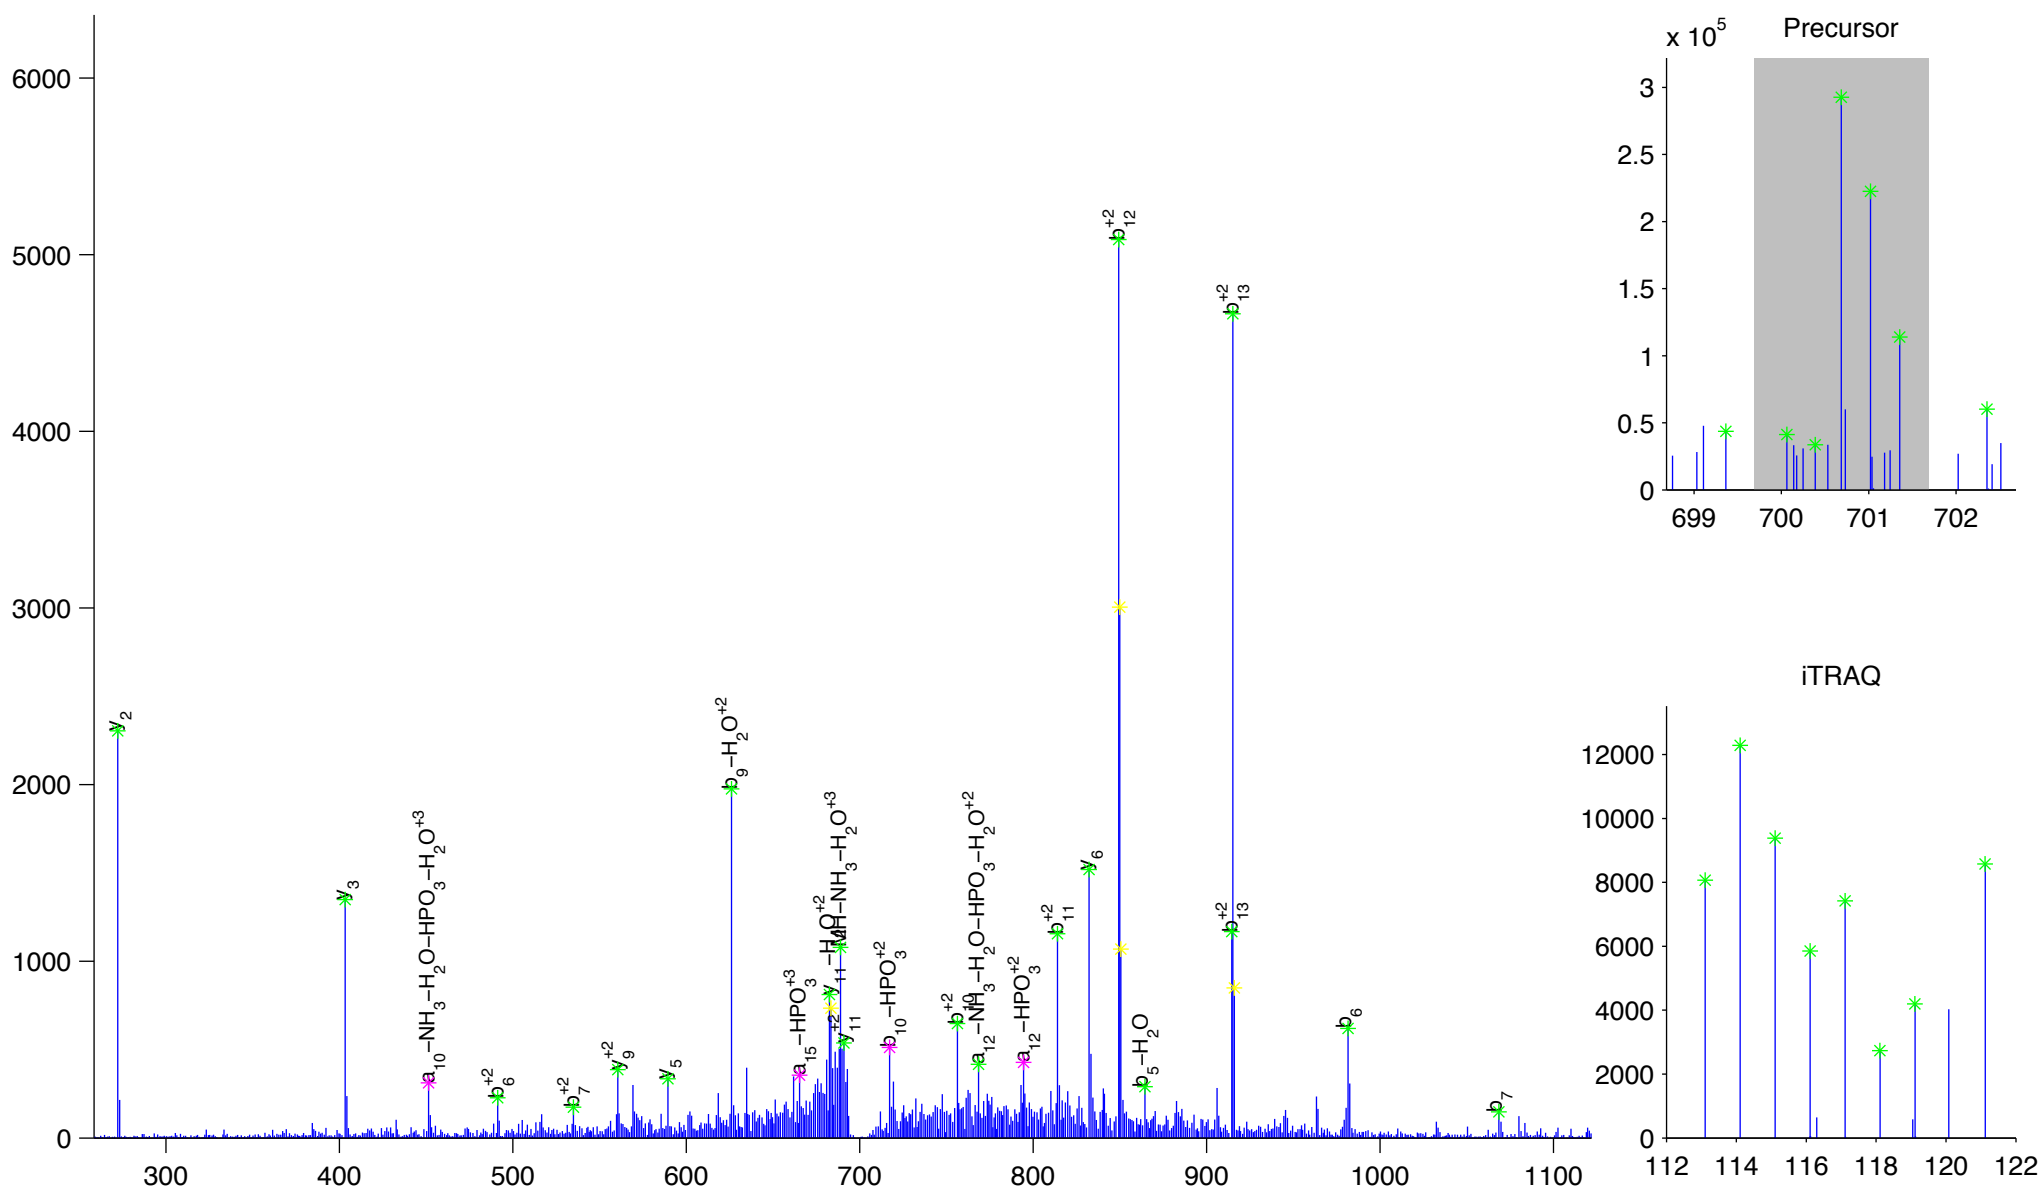



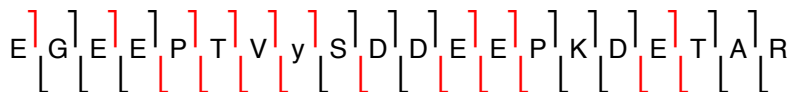

progesterone receptor membrane component

Charge State: +4

Scan Number: 2863

File Name: 100827ptp1blivers\_ncHFD\_basal.raw

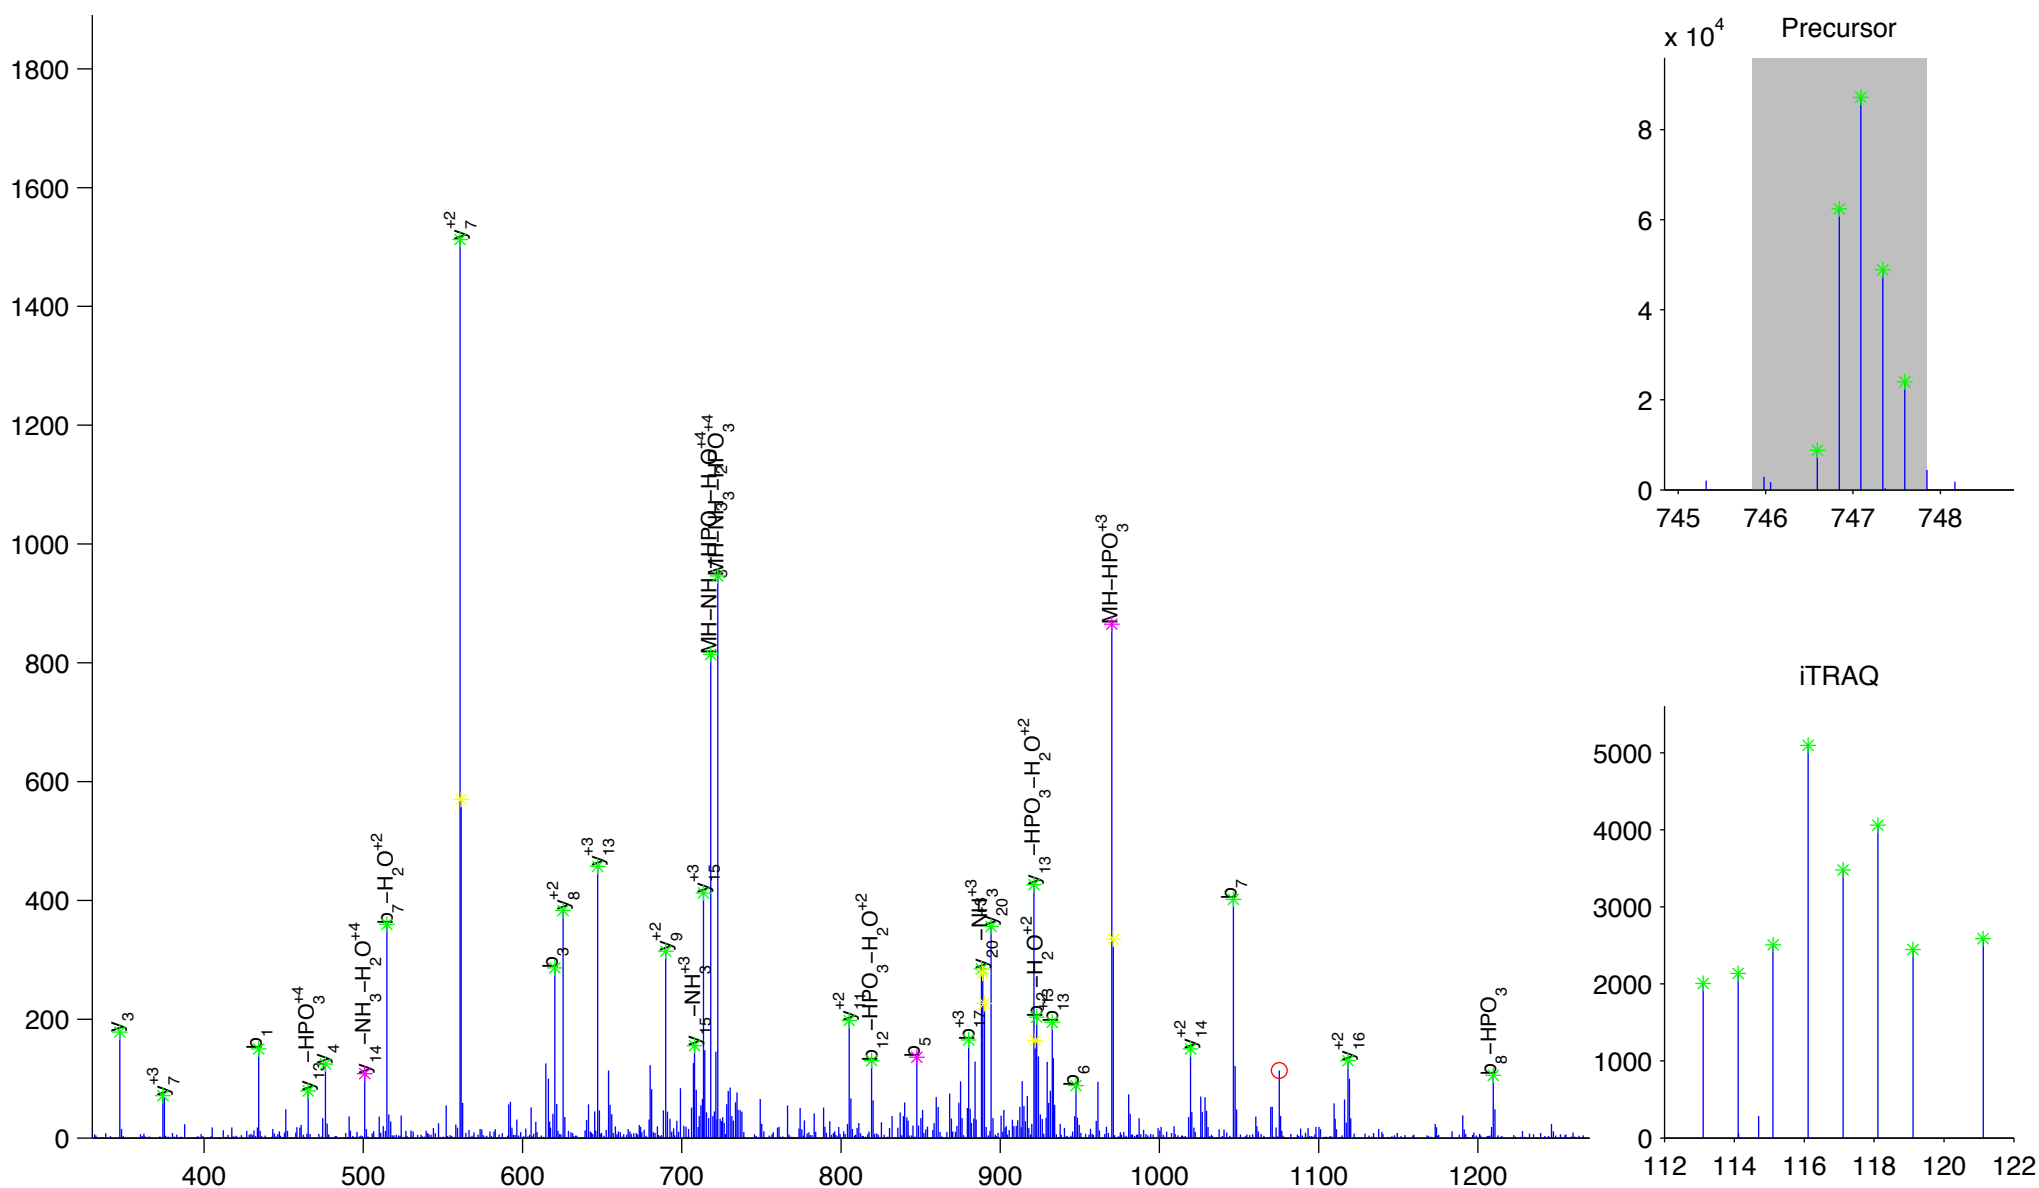

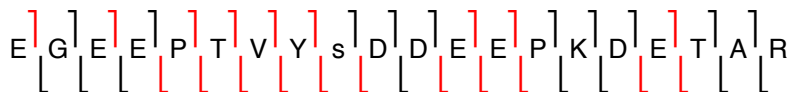

progesterone receptor membrane component

Charge State: +4

Scan Number: 2863

File Name: 100827ptp1blivers\_ncHFD\_basal.raw

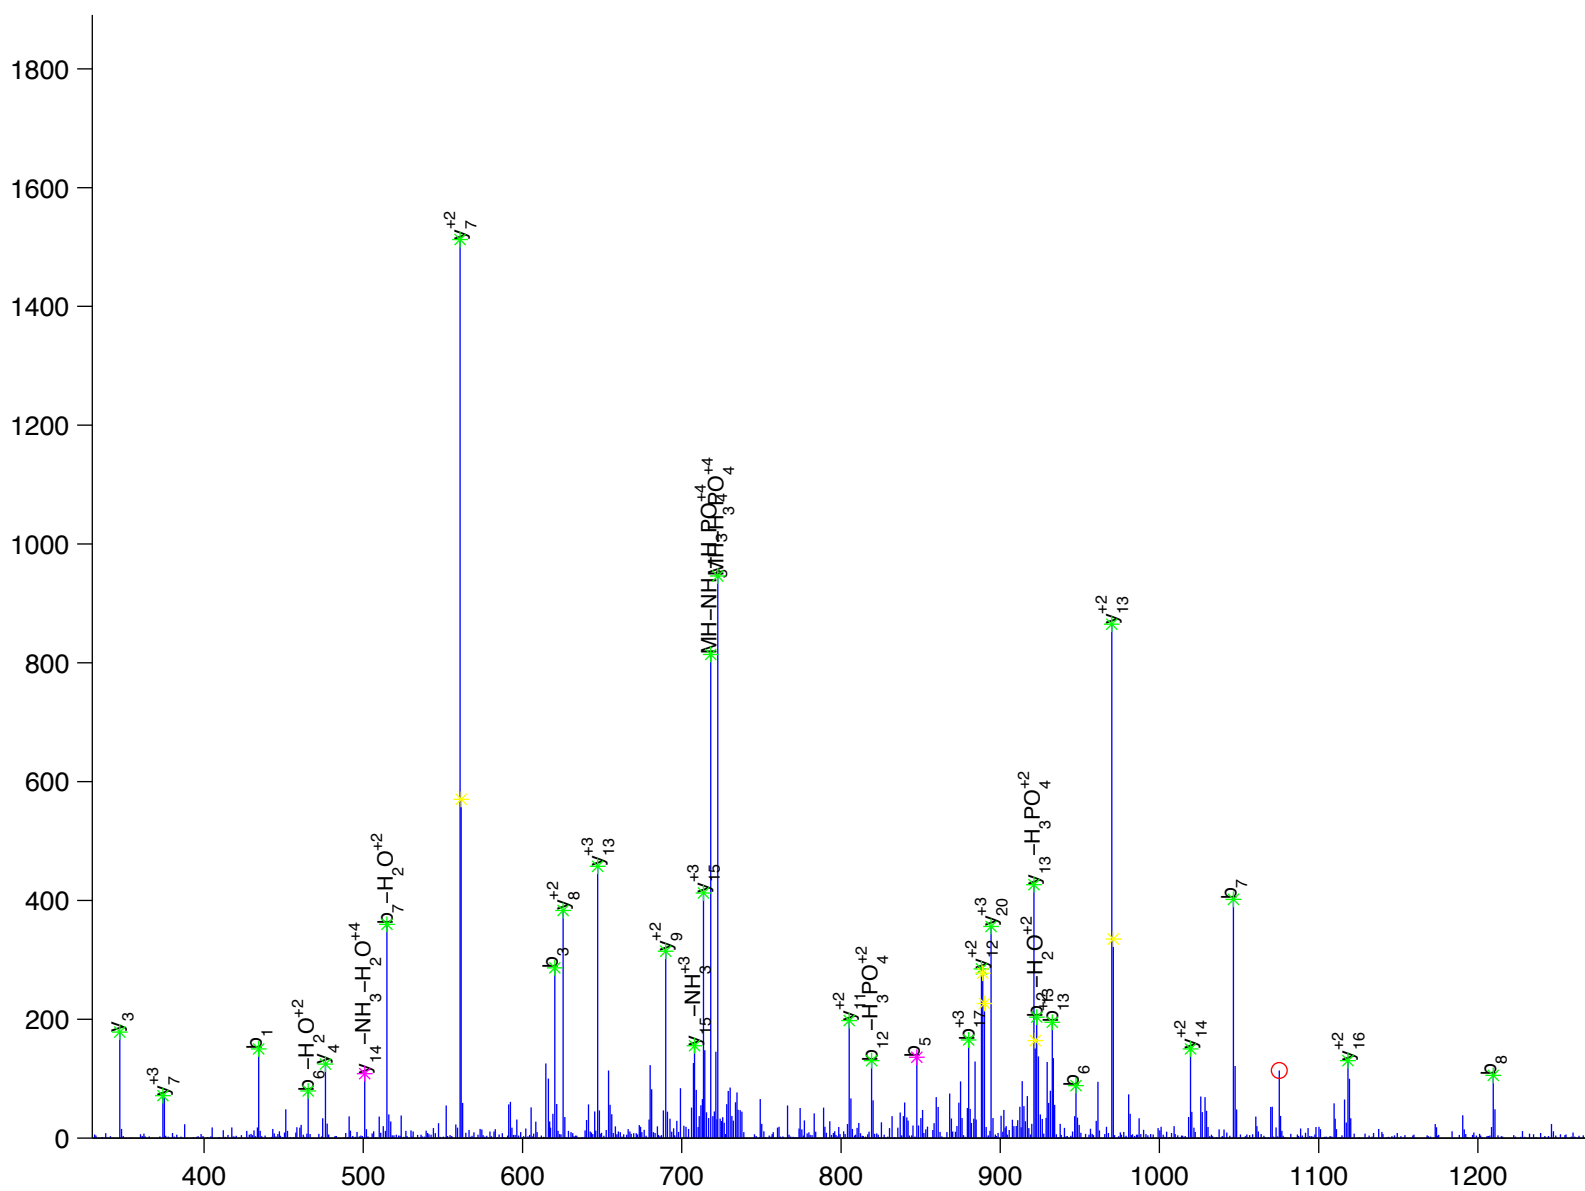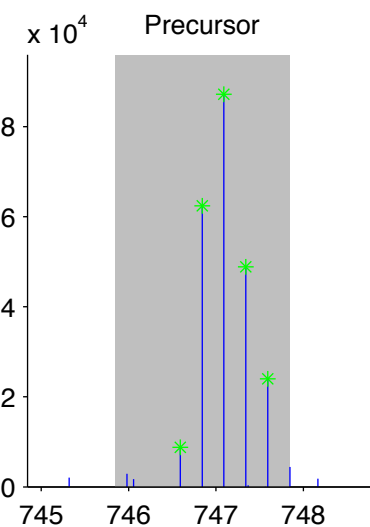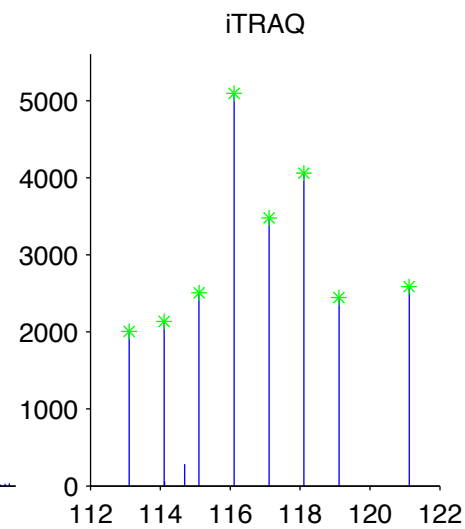

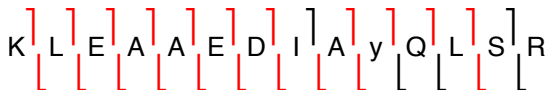

prohibitin  
 Charge State: +3  
 Scan Number: 6513  
 File Name: 100905ptp1blivers\_ncHFD\_basal.raw

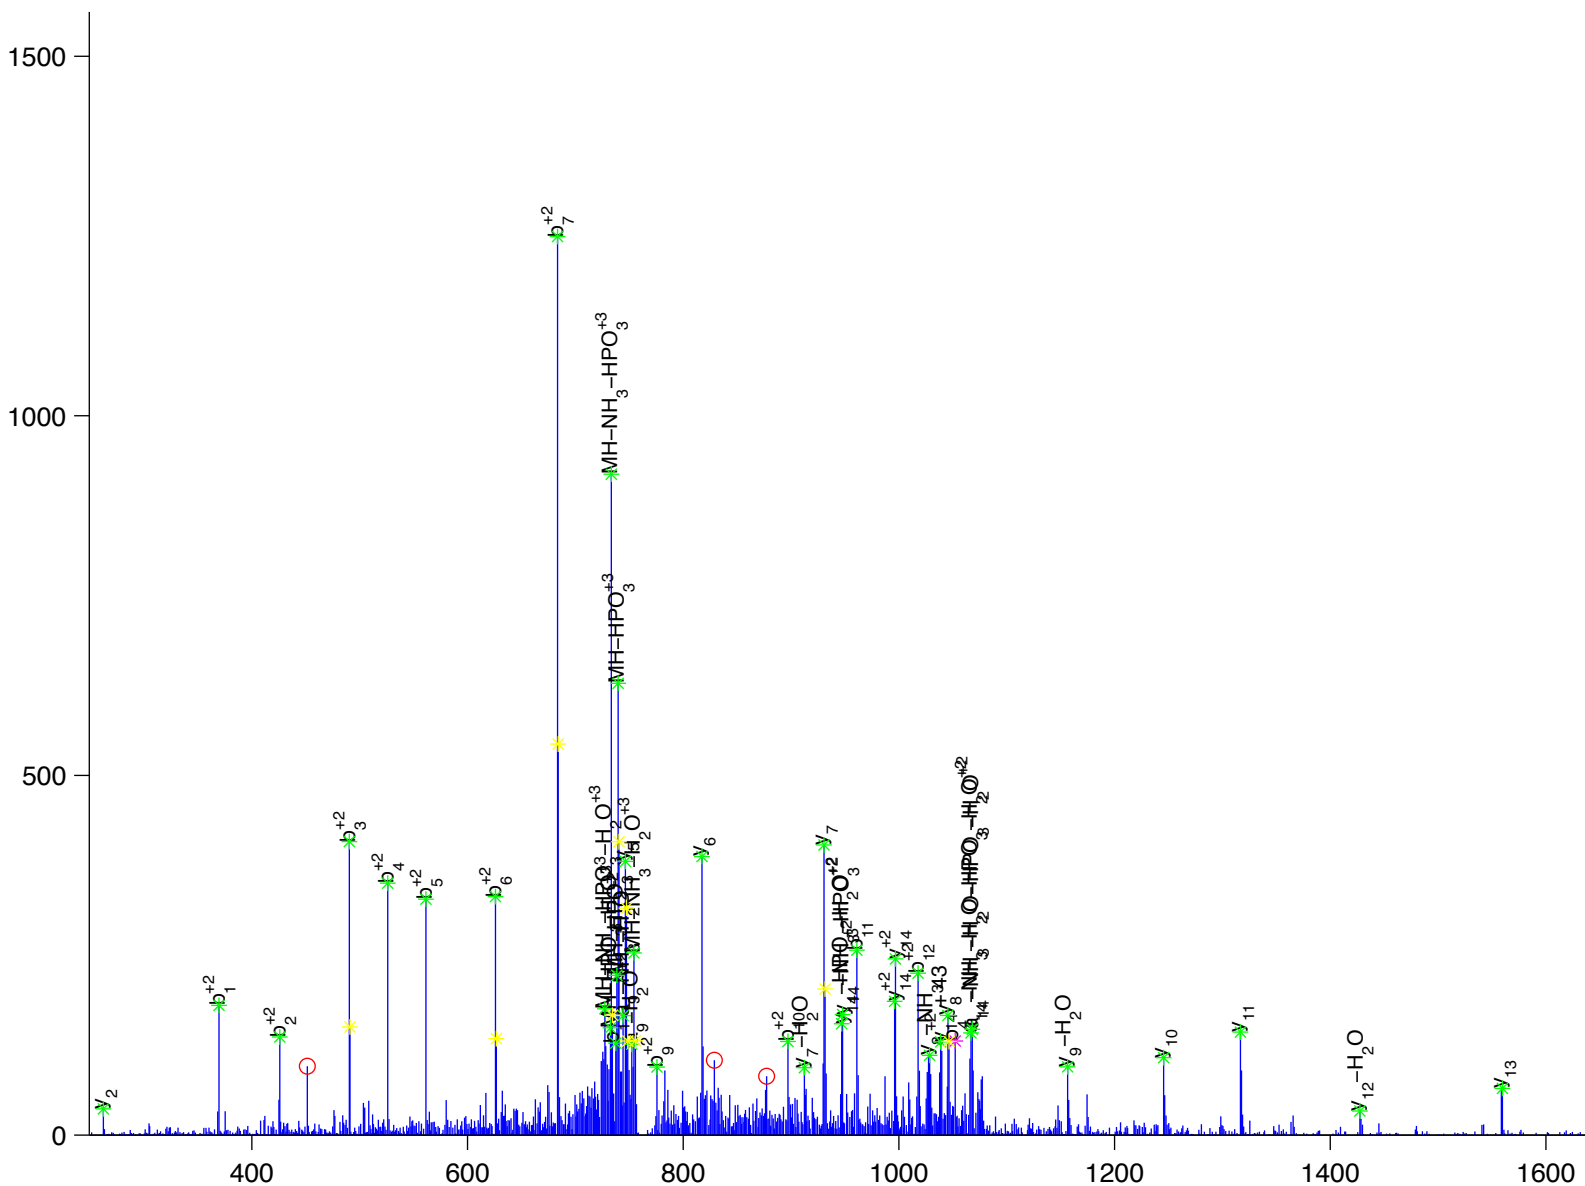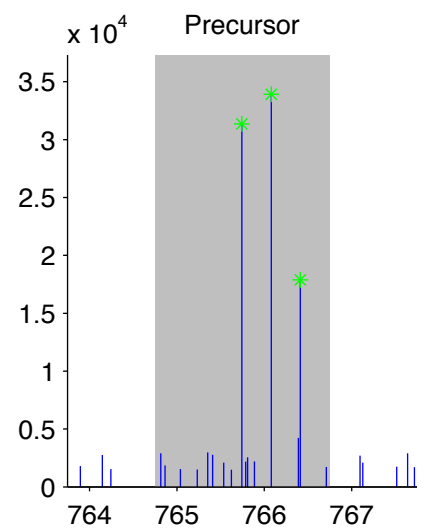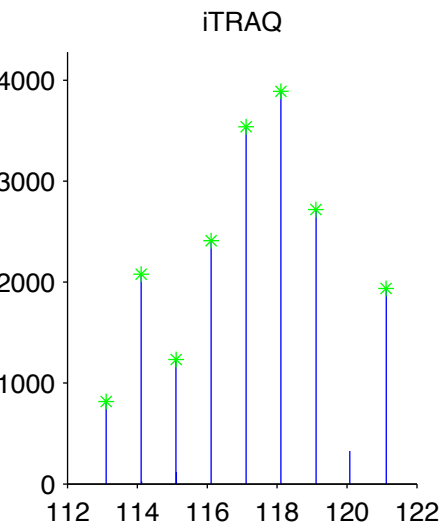

T[F]G[E]N[y]V[Q]E[L]L[E]K

proline synthetase co-transcribed isoform a

Charge State: +3

Scan Number: 11729

File Name: 090807ptp1blivers\_M\_HFD\_basal.raw

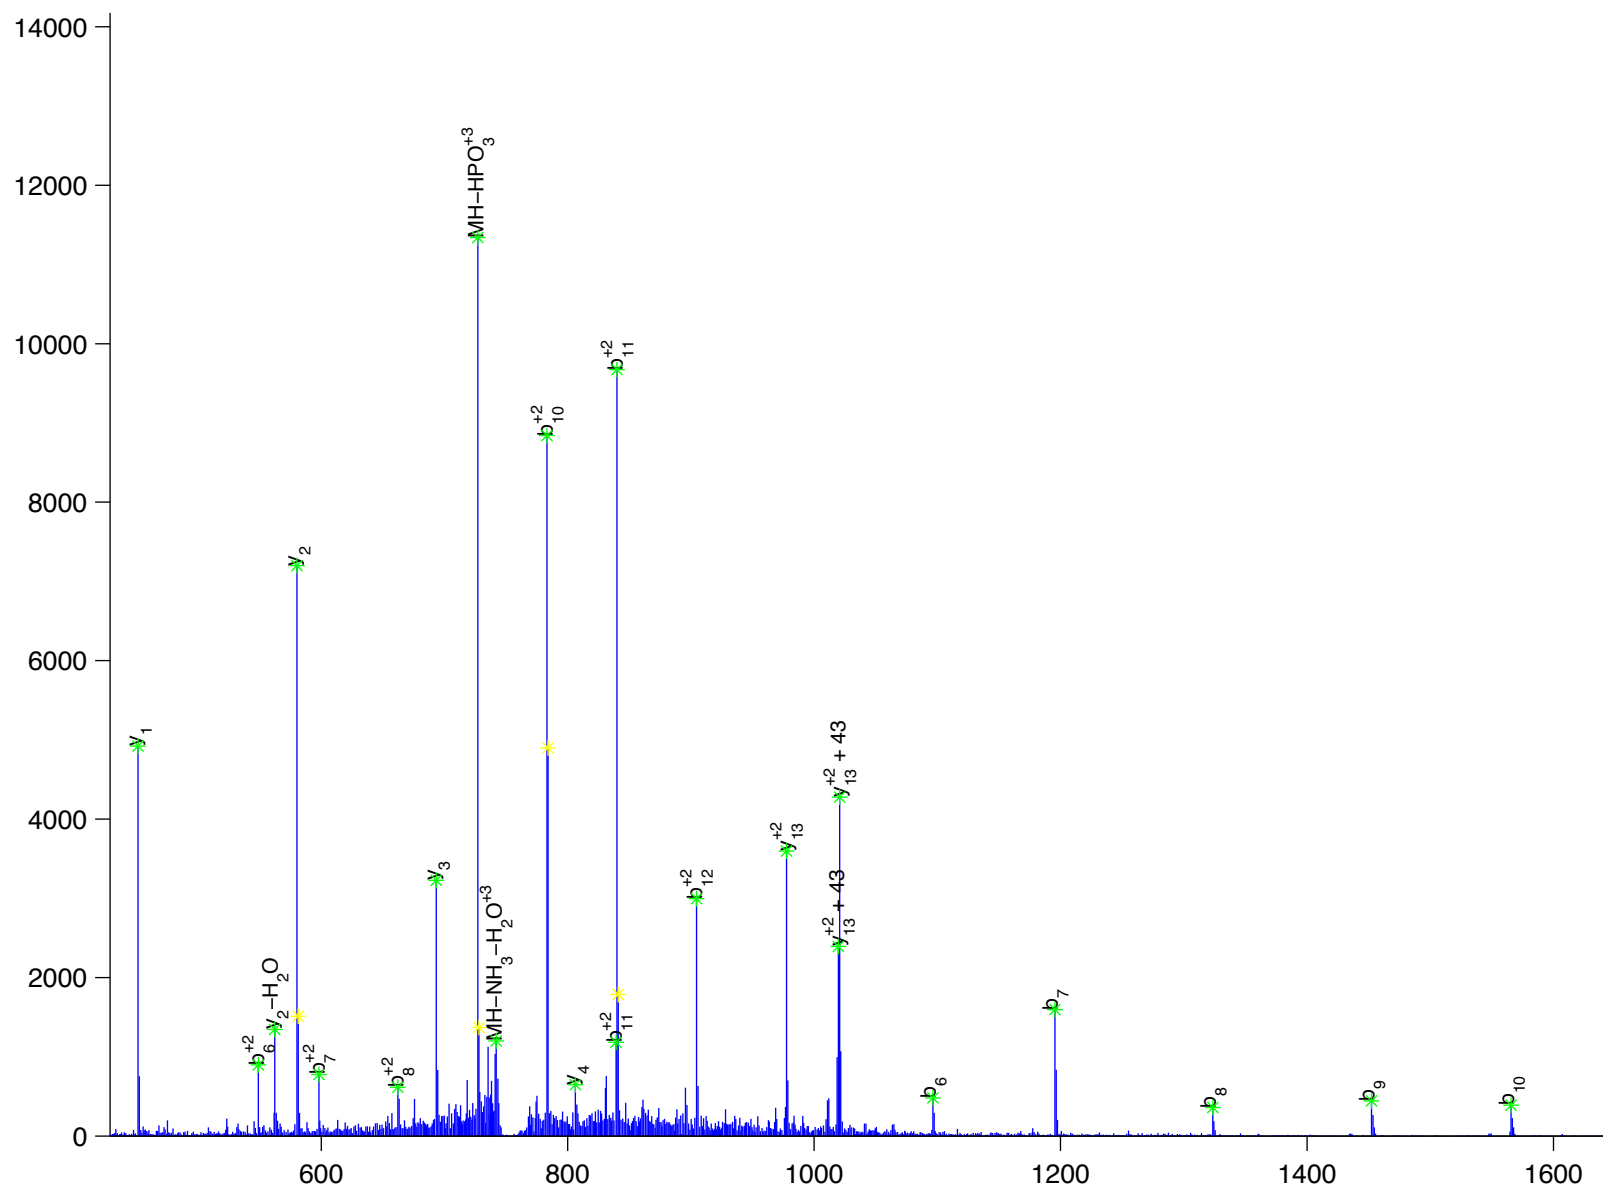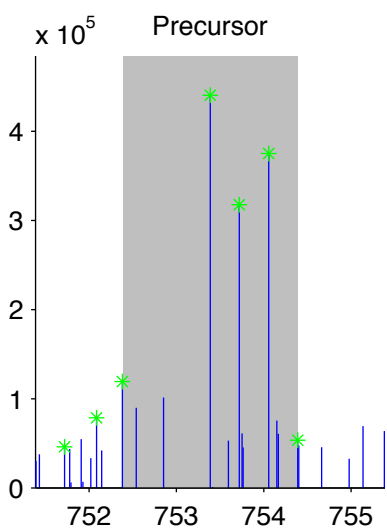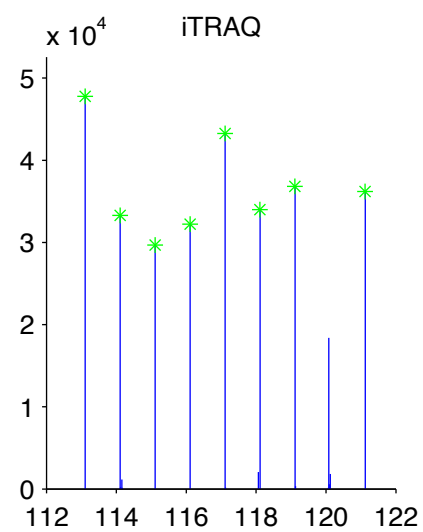

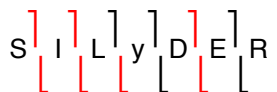

proteasome (prosome, macropain) subunit, alpha type 2

Charge State: +2

Scan Number: 4451

File Name: 090806ptp1blivers\_M\_NC2.raw

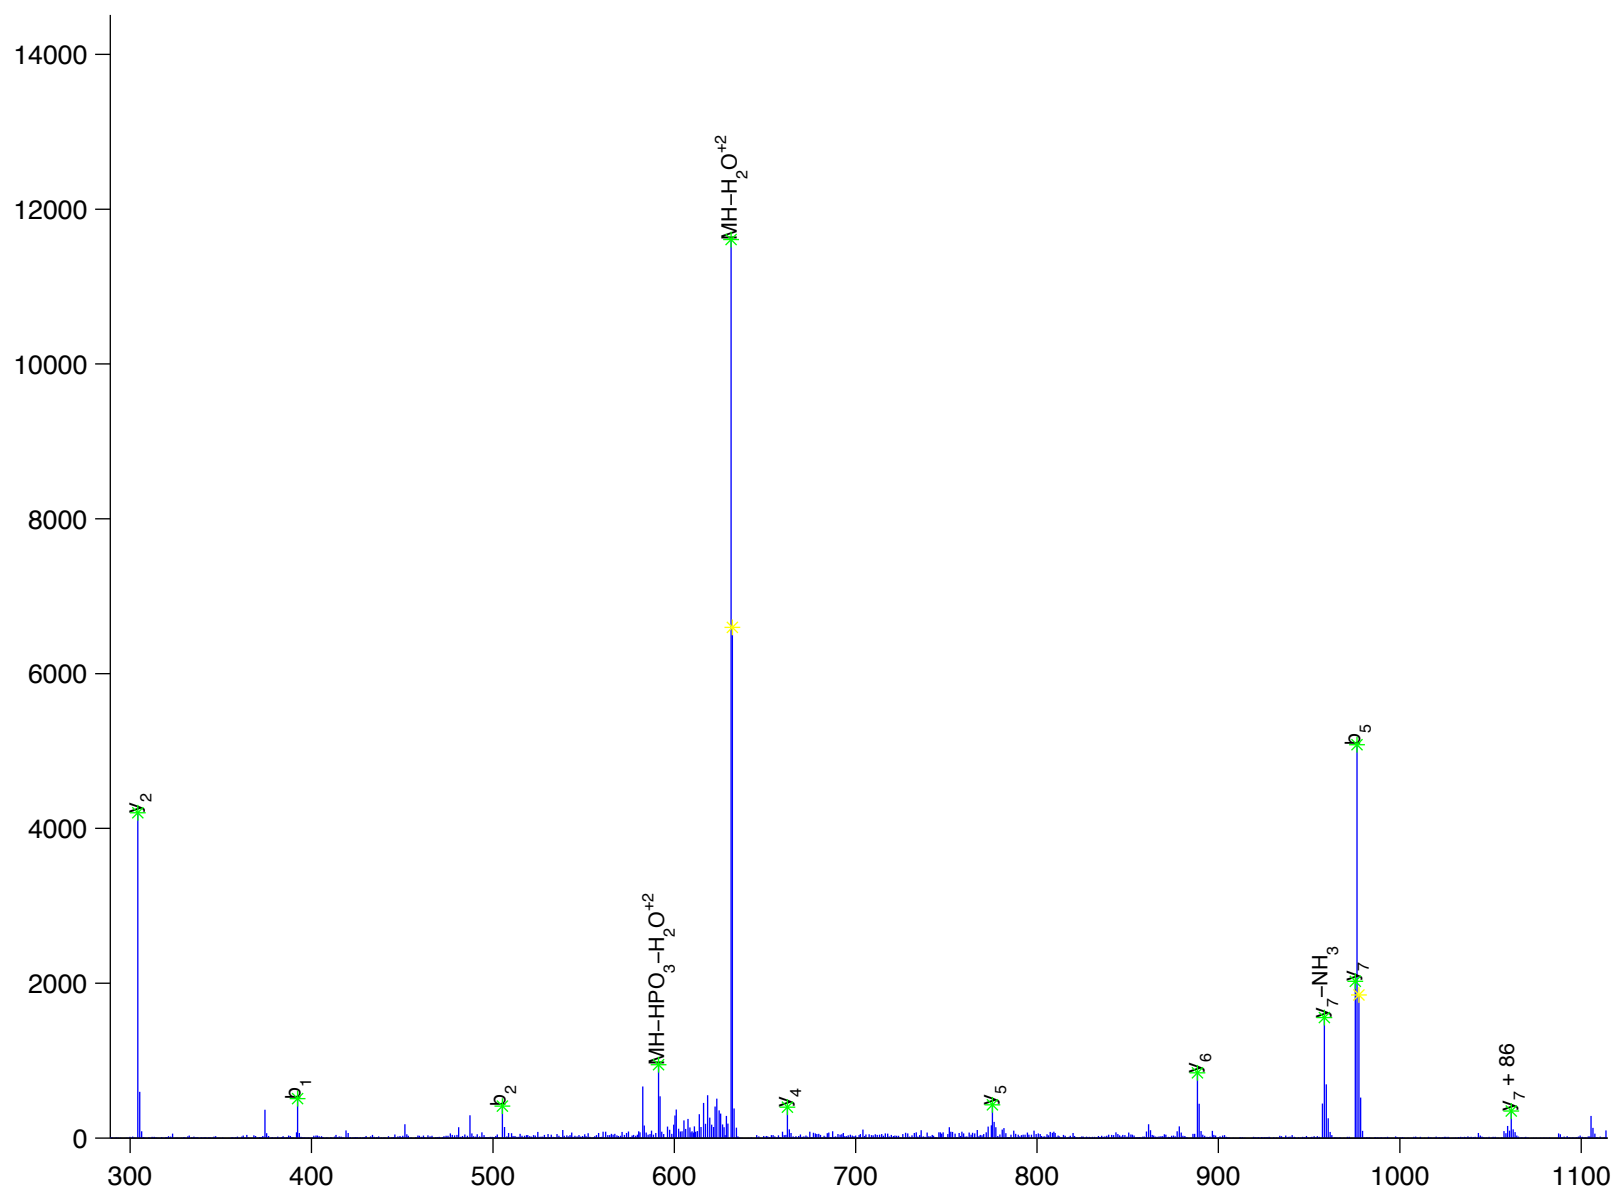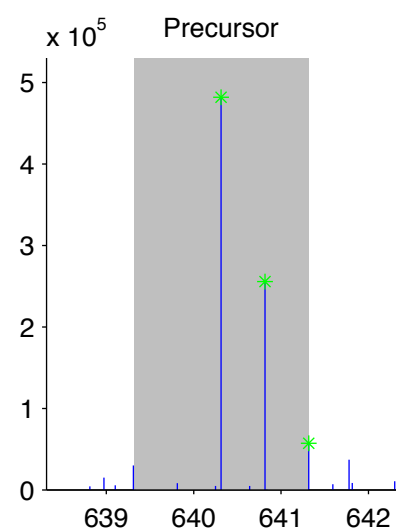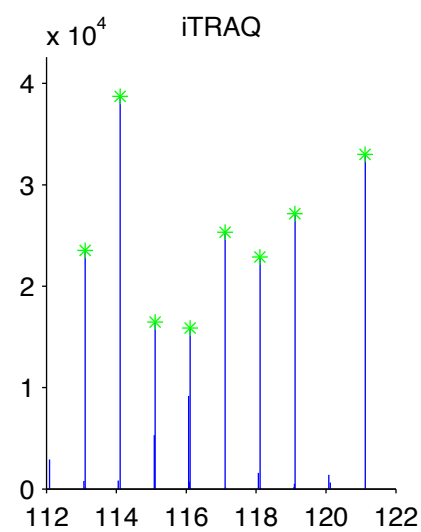

V [ y ] E [ N ] V [ G ] L [ M ] Q [ Q ] Q [ R ]

protein tyrosine phosphatase, non-receptor type 11

Charge State: +2

Scan Number: 284

File Name: HJ072909\_HFD\_E1\_2.raw

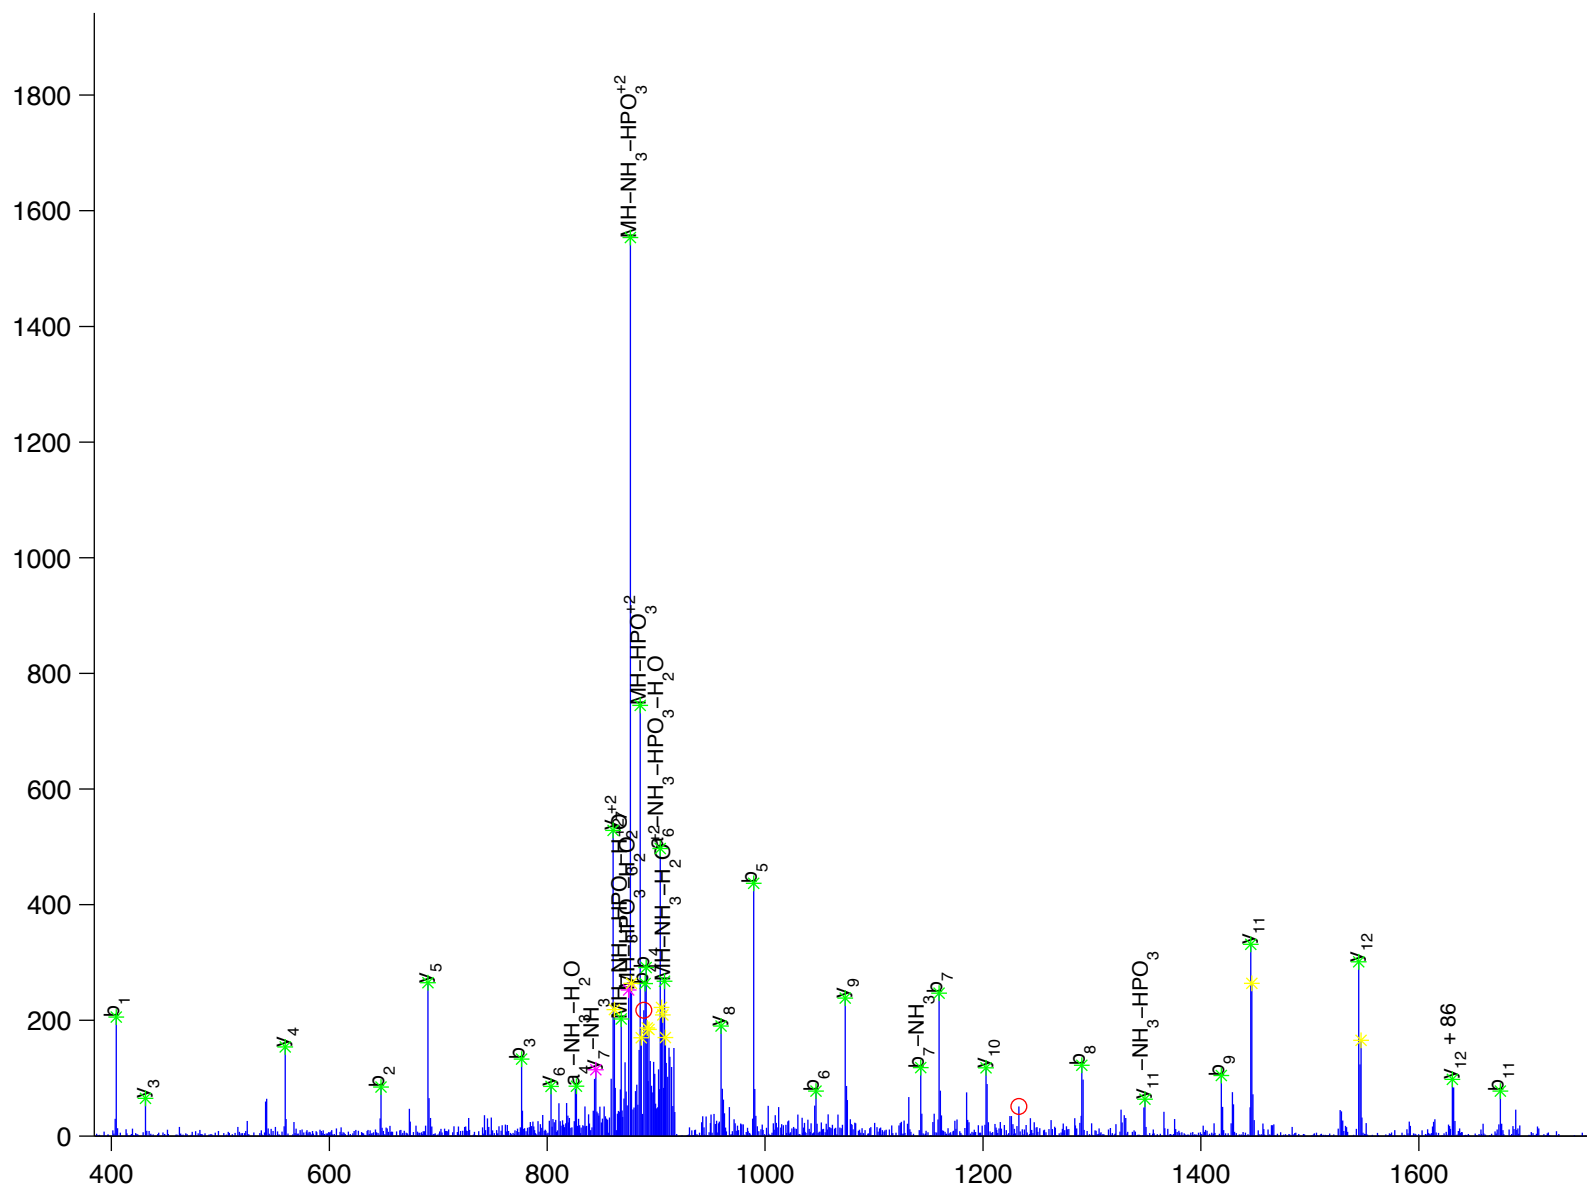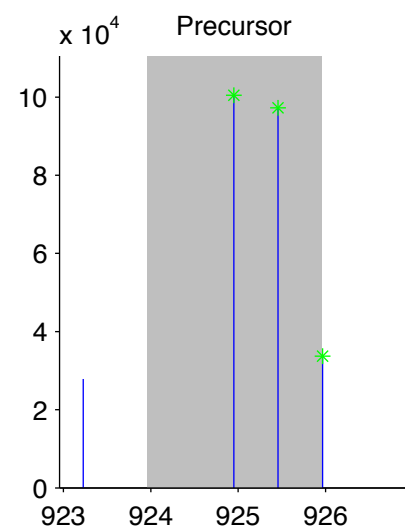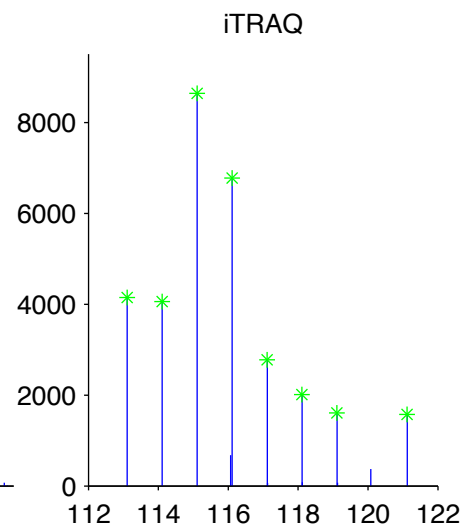

I [Q] [N] [T] [G] [D] y [Y] [D] [L] [Y] [G] [G] [E] K

protein tyrosine phosphatase, non-receptor type 11

Charge State: +3

Scan Number: 4678

File Name: 100905ptp1blivers\_ncHFD\_basal.raw

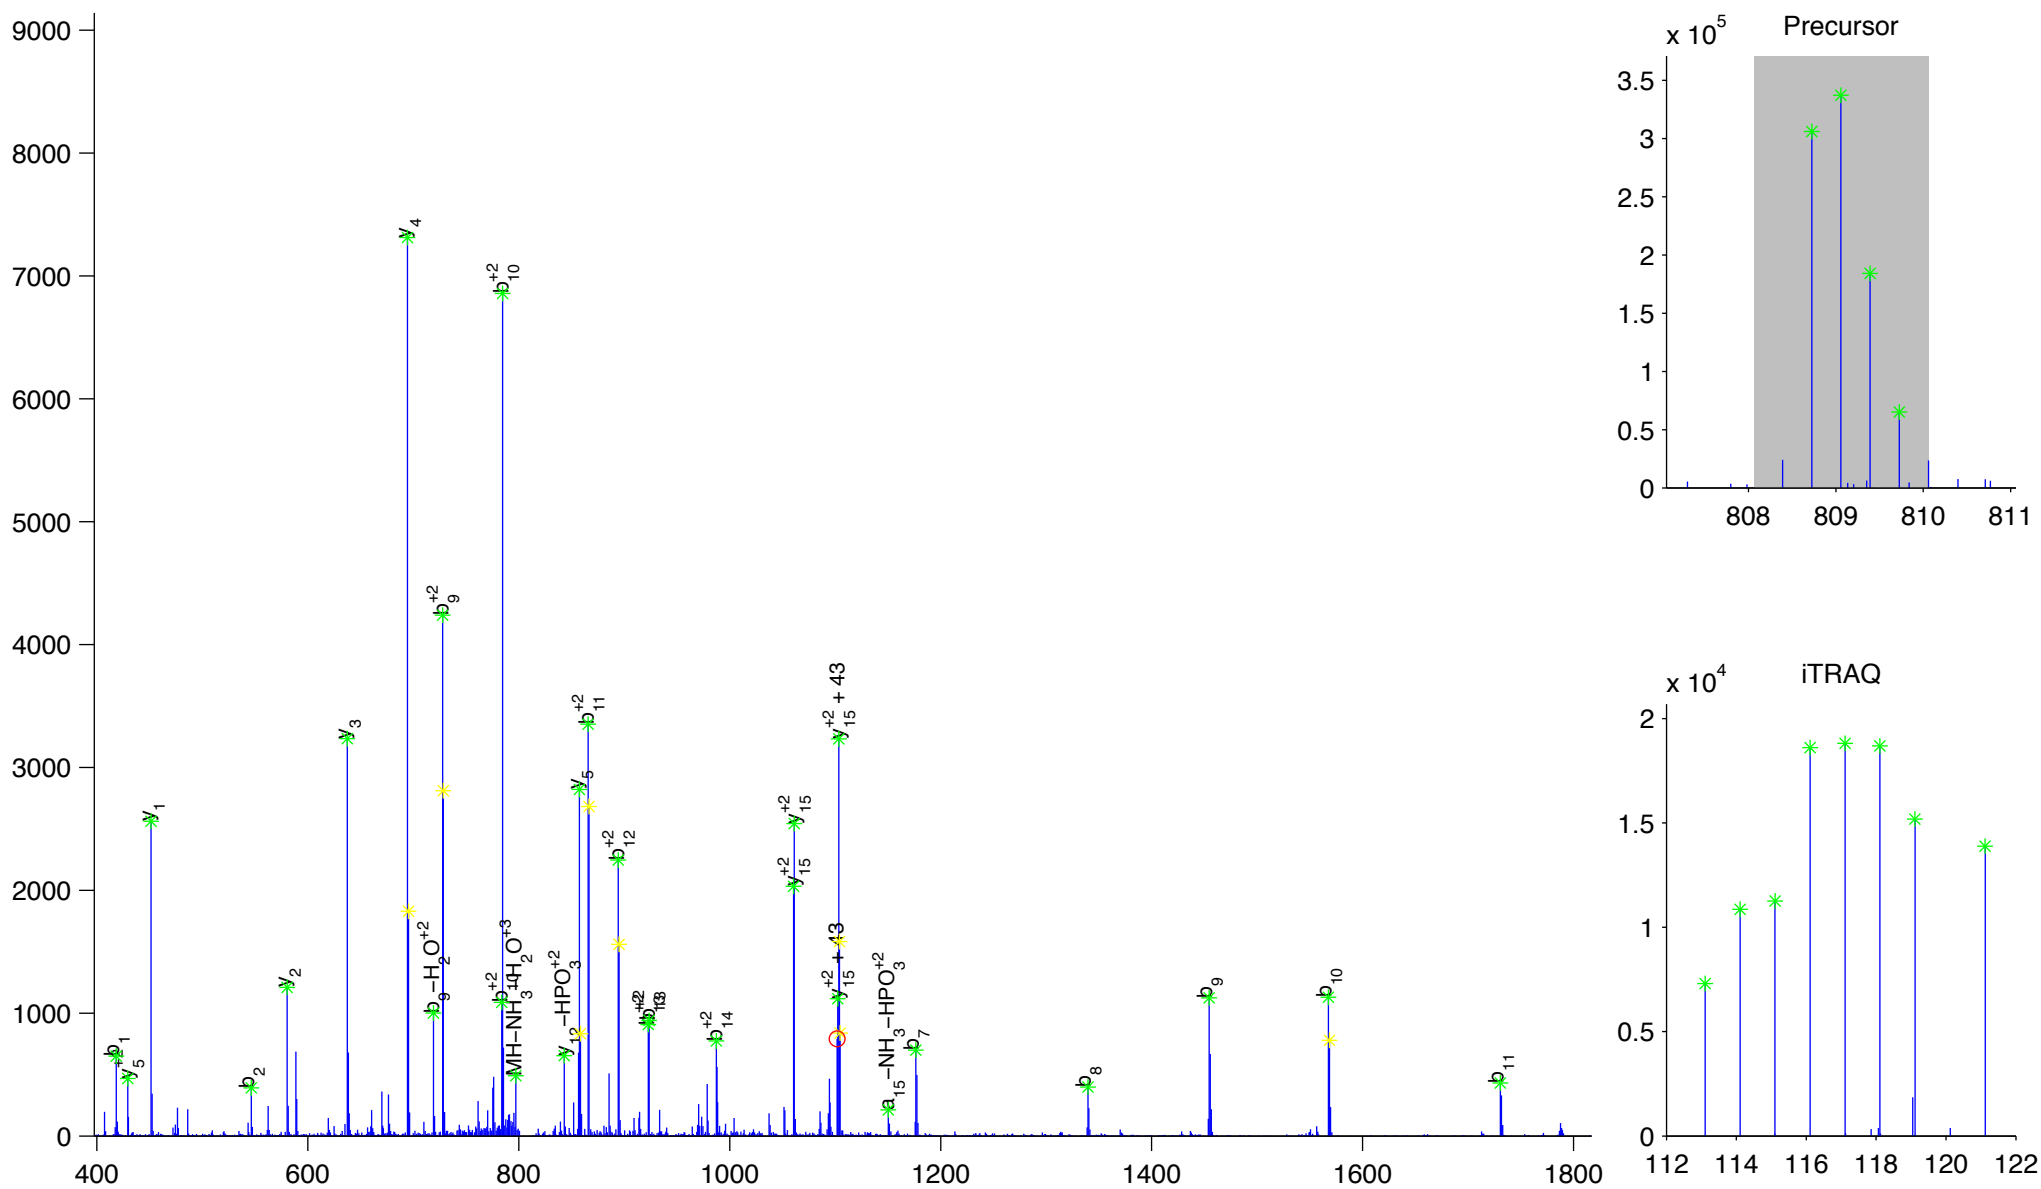

V V Q E Y I D A F S D y A N F

protein tyrosine phosphatase, receptor type, A

Charge State: +3

Scan Number: 13649

File Name: 090807ptp1blivers\_M\_HFD\_basal.raw

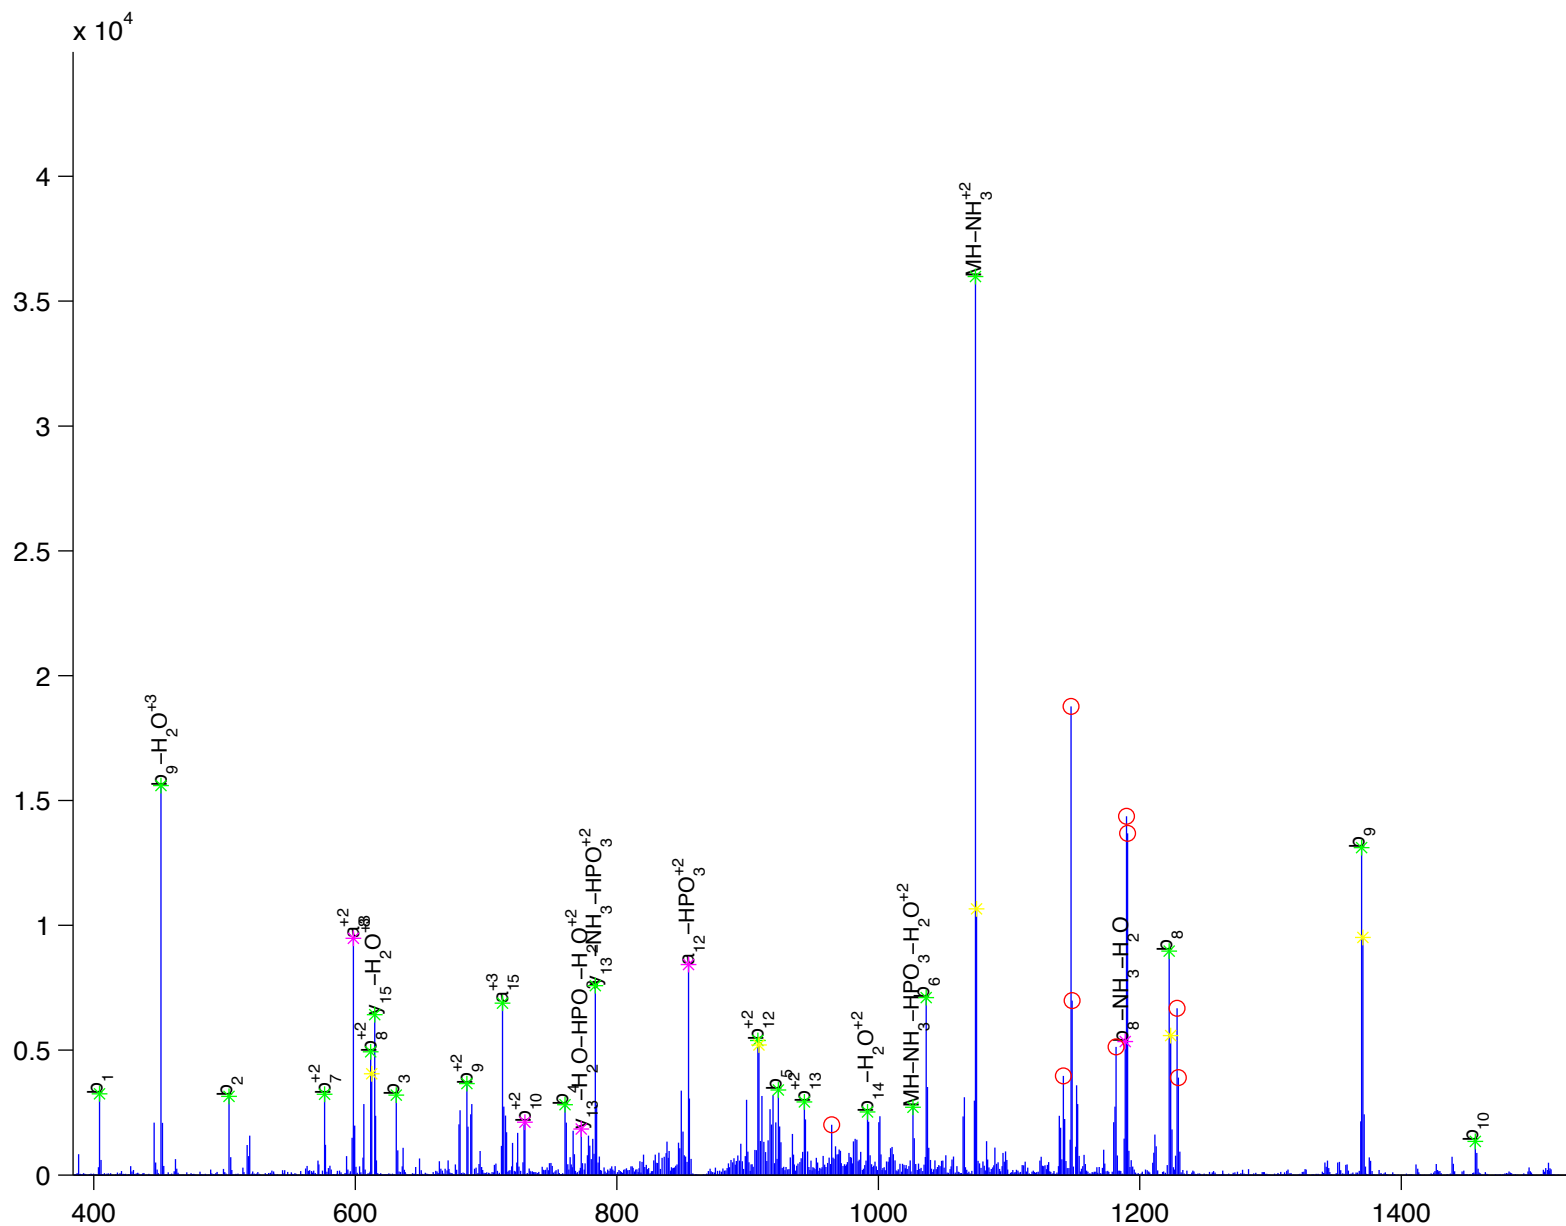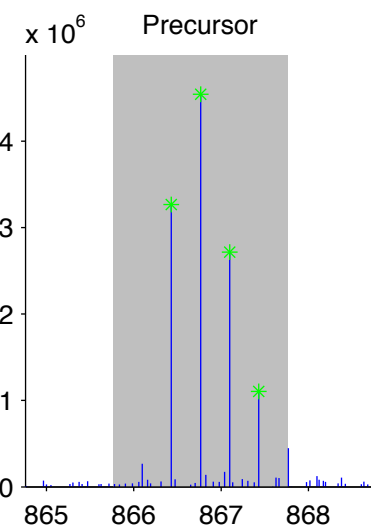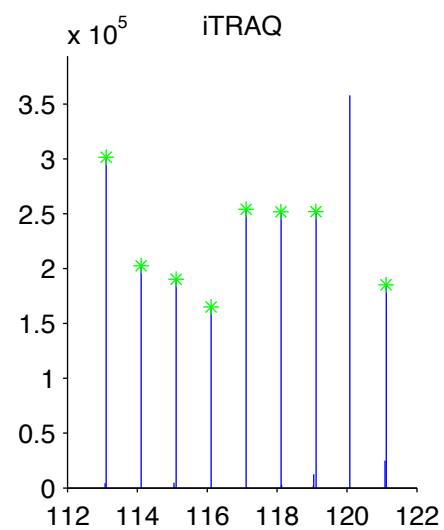



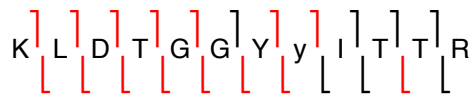

proto-oncogene tyrosine-protein kinase Fgr

Charge State: +3

Scan Number: 4876

File Name: 091130ptp1blivers\_hfd\_basal2.raw

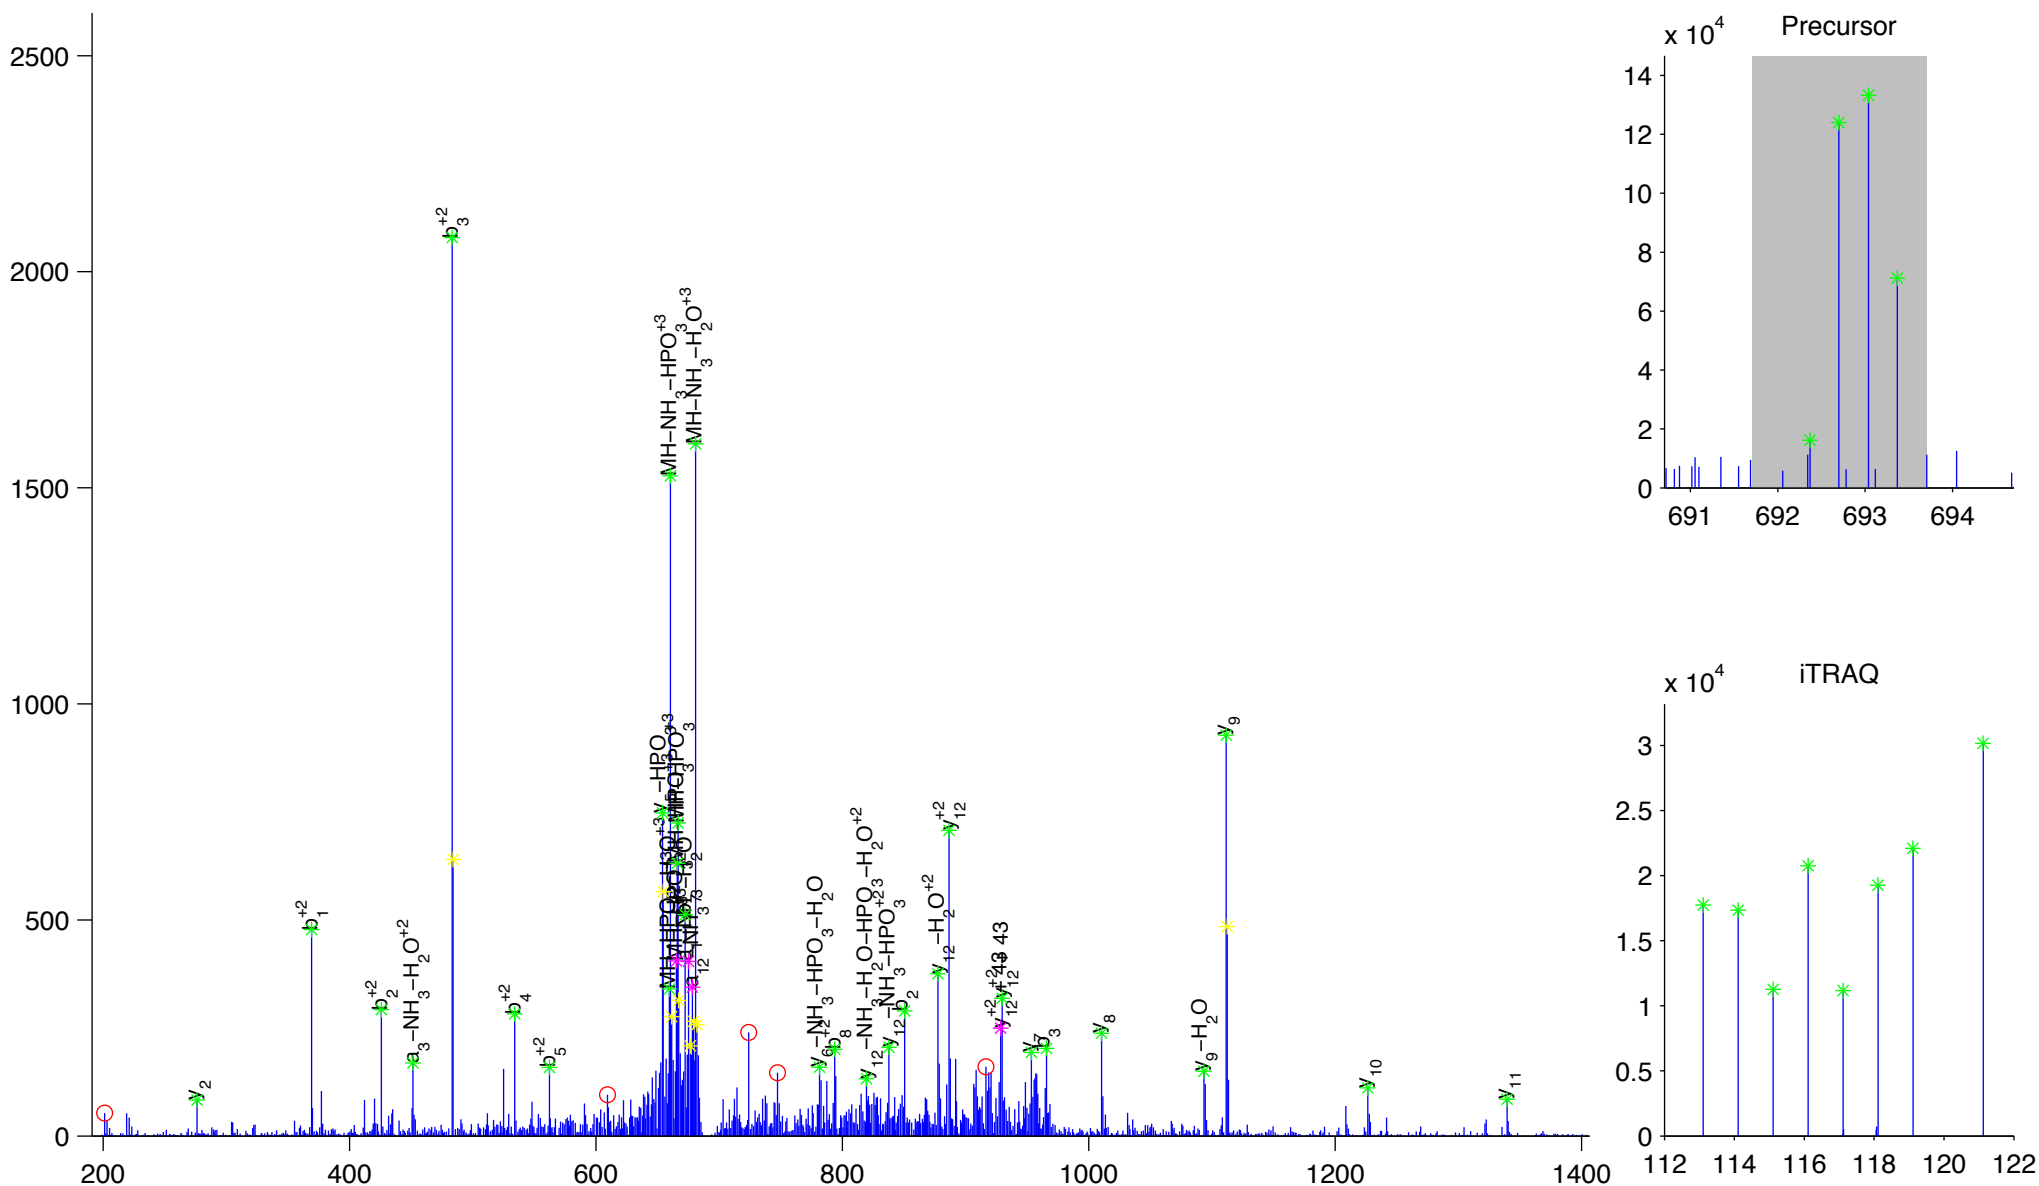

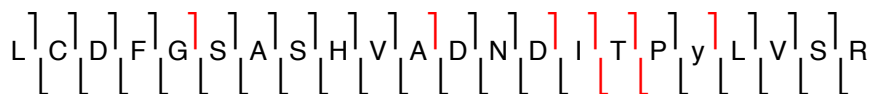

PRP4 pre-mRNA processing factor 4 homolog B

Charge State: +4

Scan Number: 7142

File Name: 091130ptp1blivers\_hfd\_basal2.raw

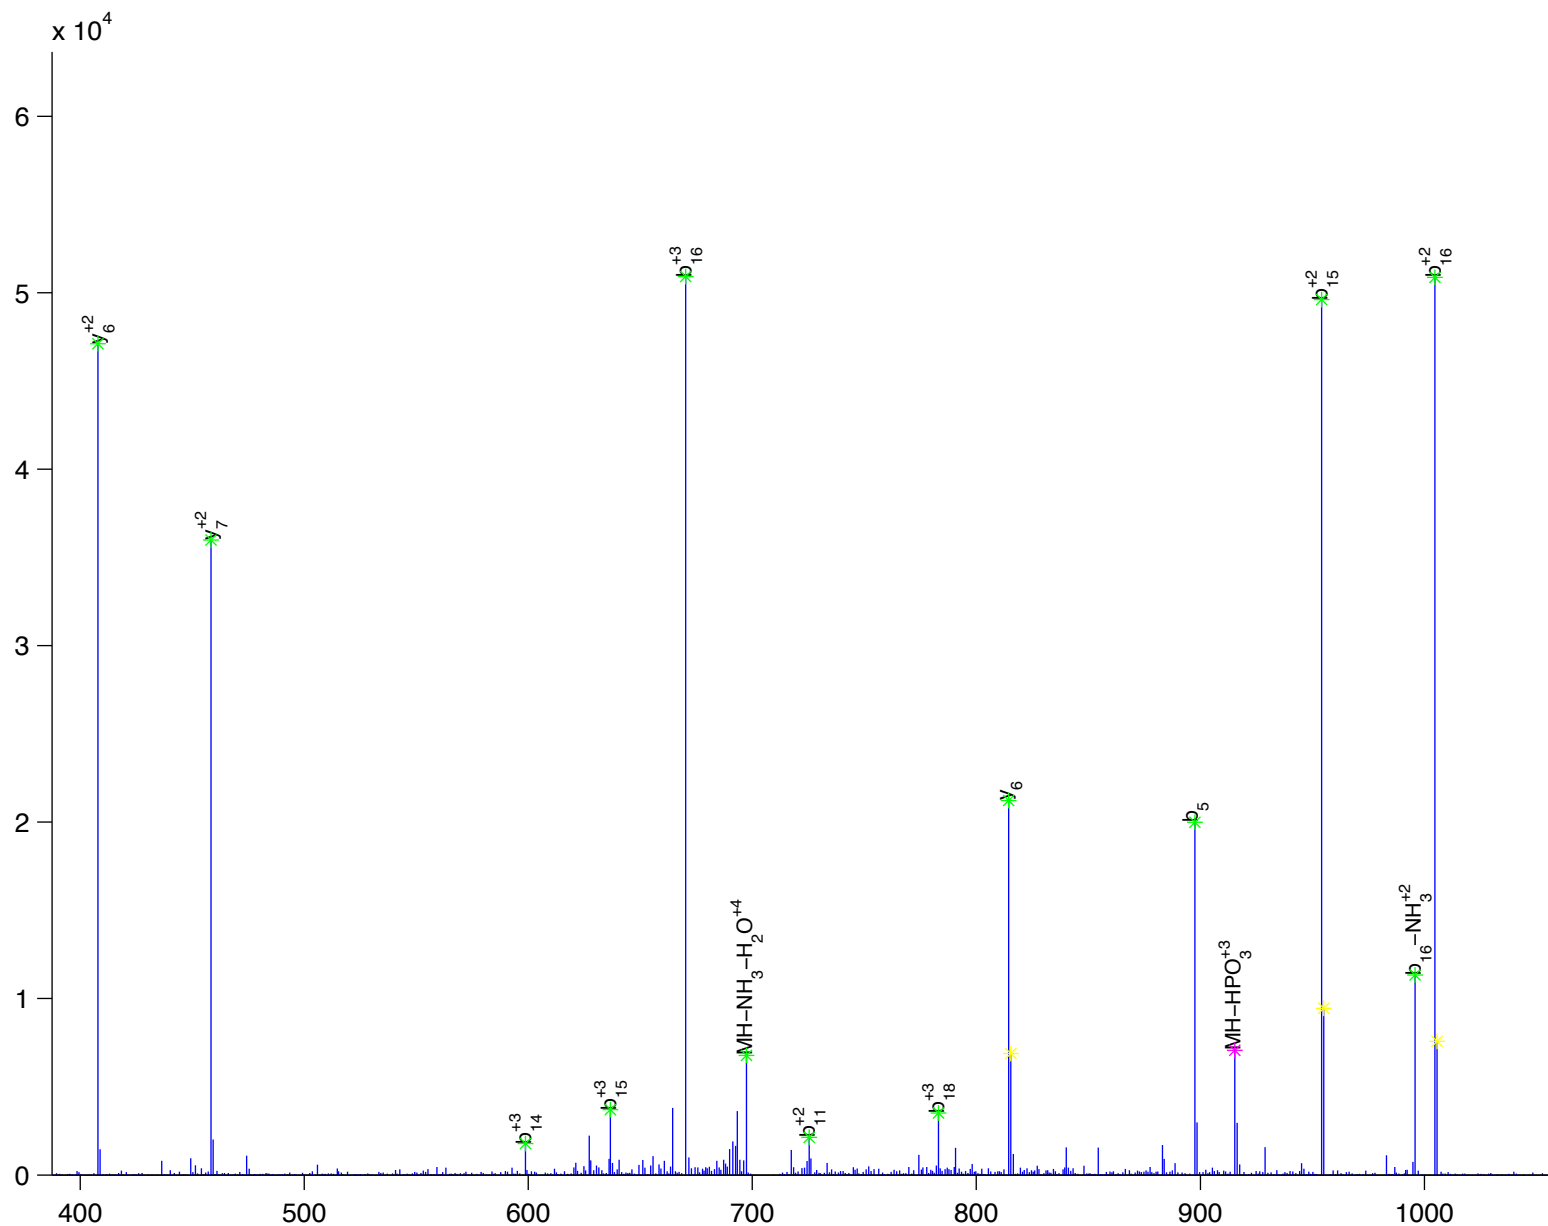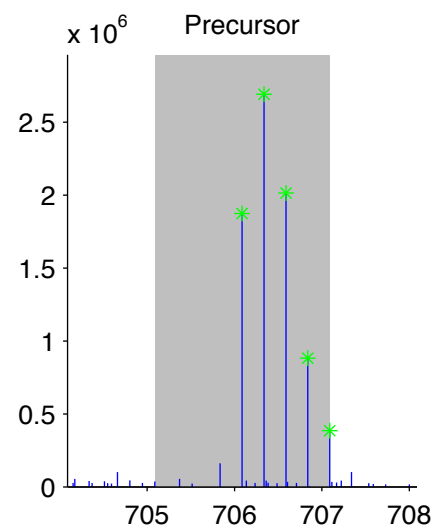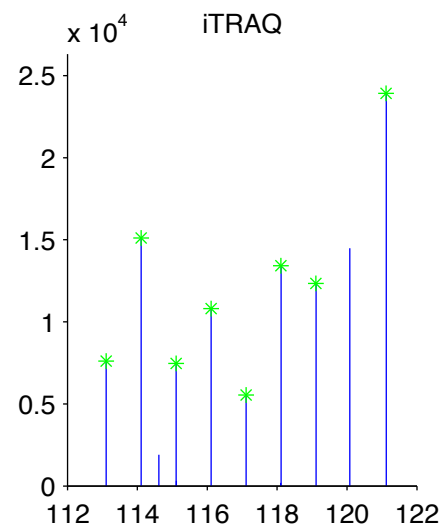

L [ D ] [ H ] [ H ] [ P ] [ E ] [ W ] [ F ] [ N ] [ V ] [ y ] [ N ] [ K ]

pterin 4 alpha carbinolamine dehydratase/dimerization cofactor of hepatocyte nuclear factor 1 alpha

Charge State: +4

Scan Number: 5661

File Name: 091130ptp1blivers\_hfd\_basal2.raw

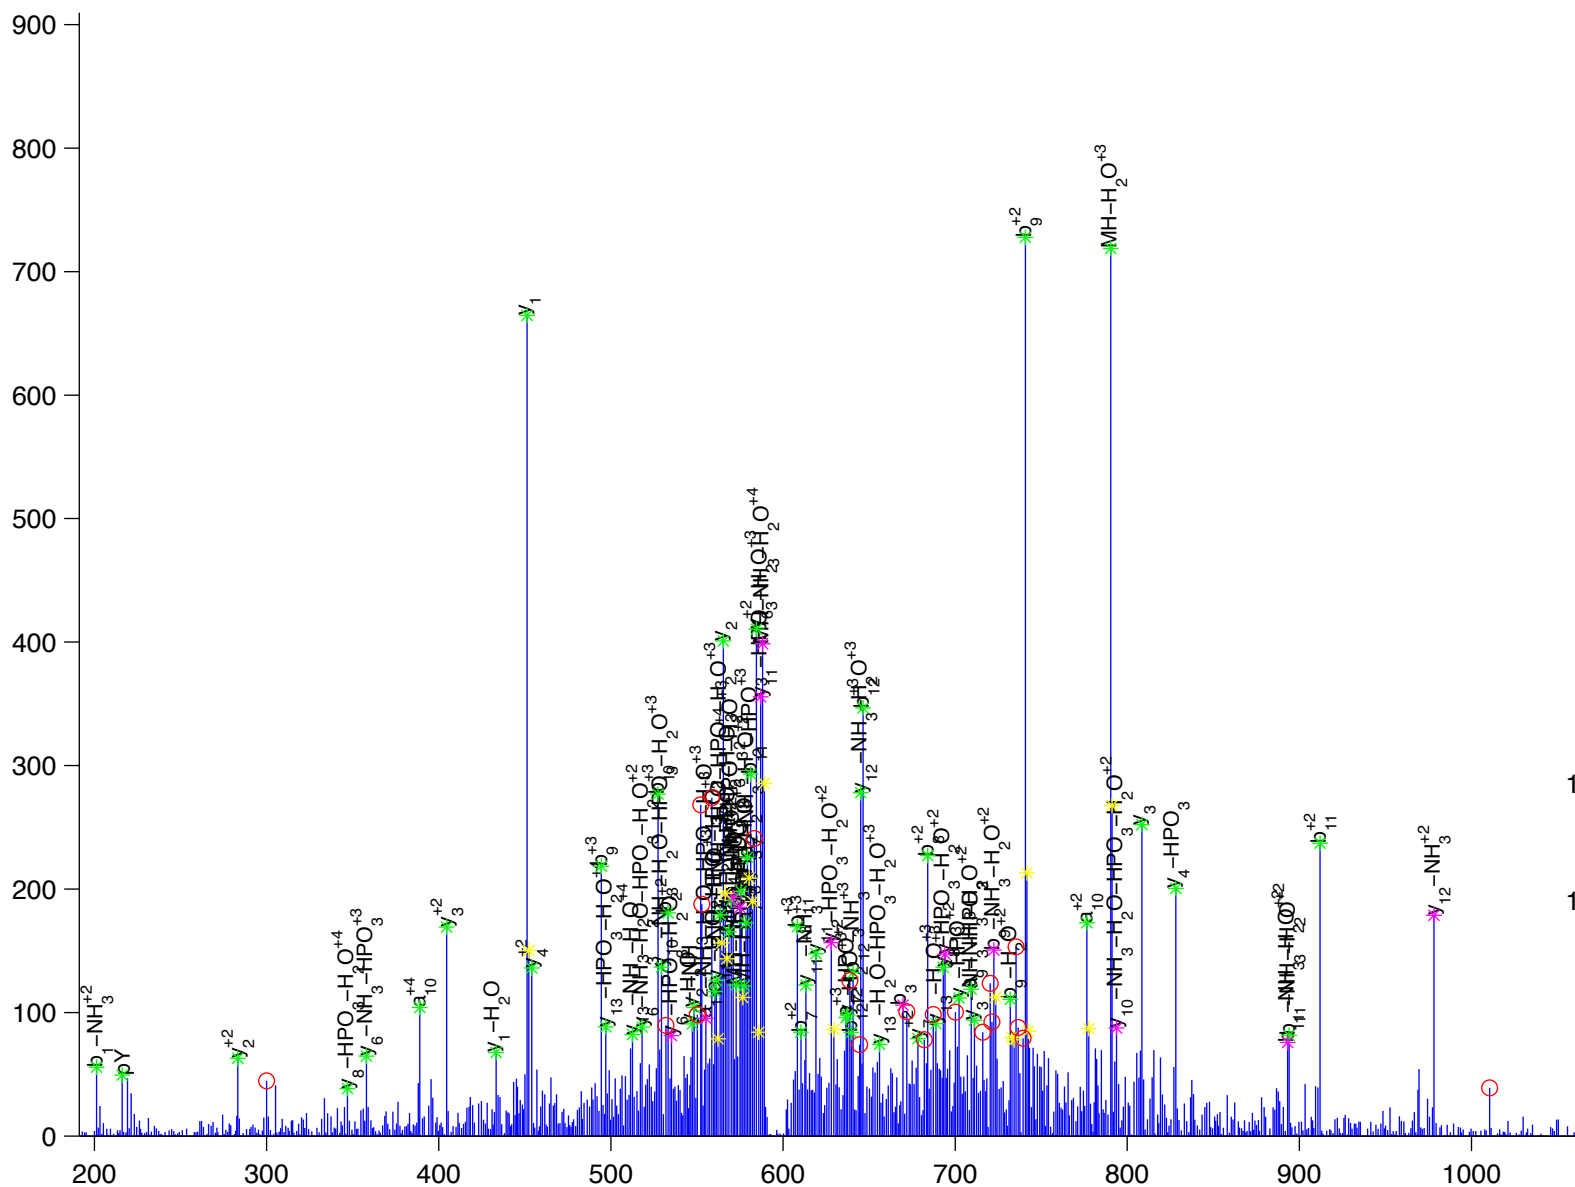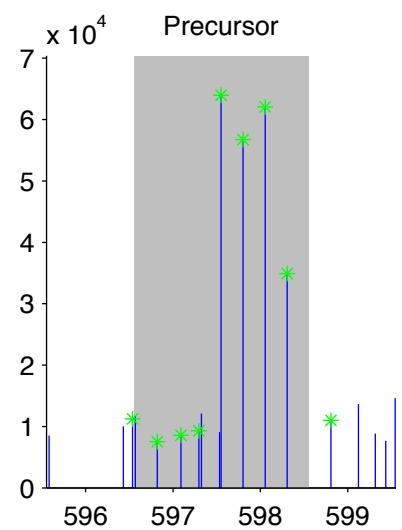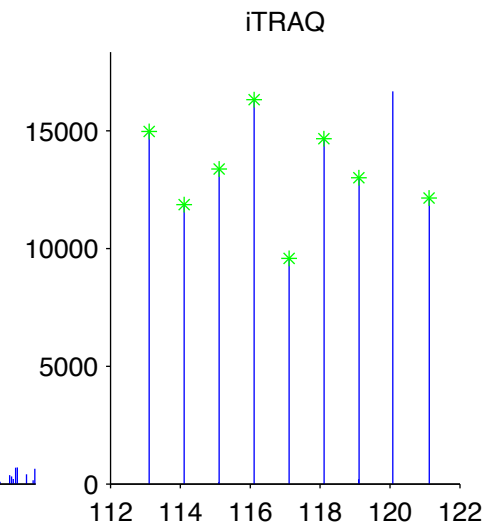

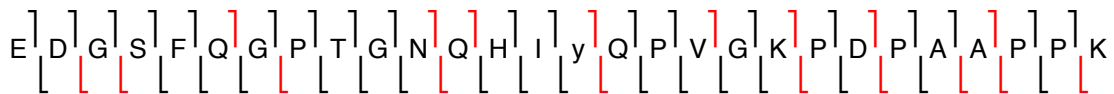

PTK2 protein tyrosine kinase 2

Charge State: +4

Scan Number: 4871

File Name: 091130ptp1blivers\_hfd\_basal2.raw

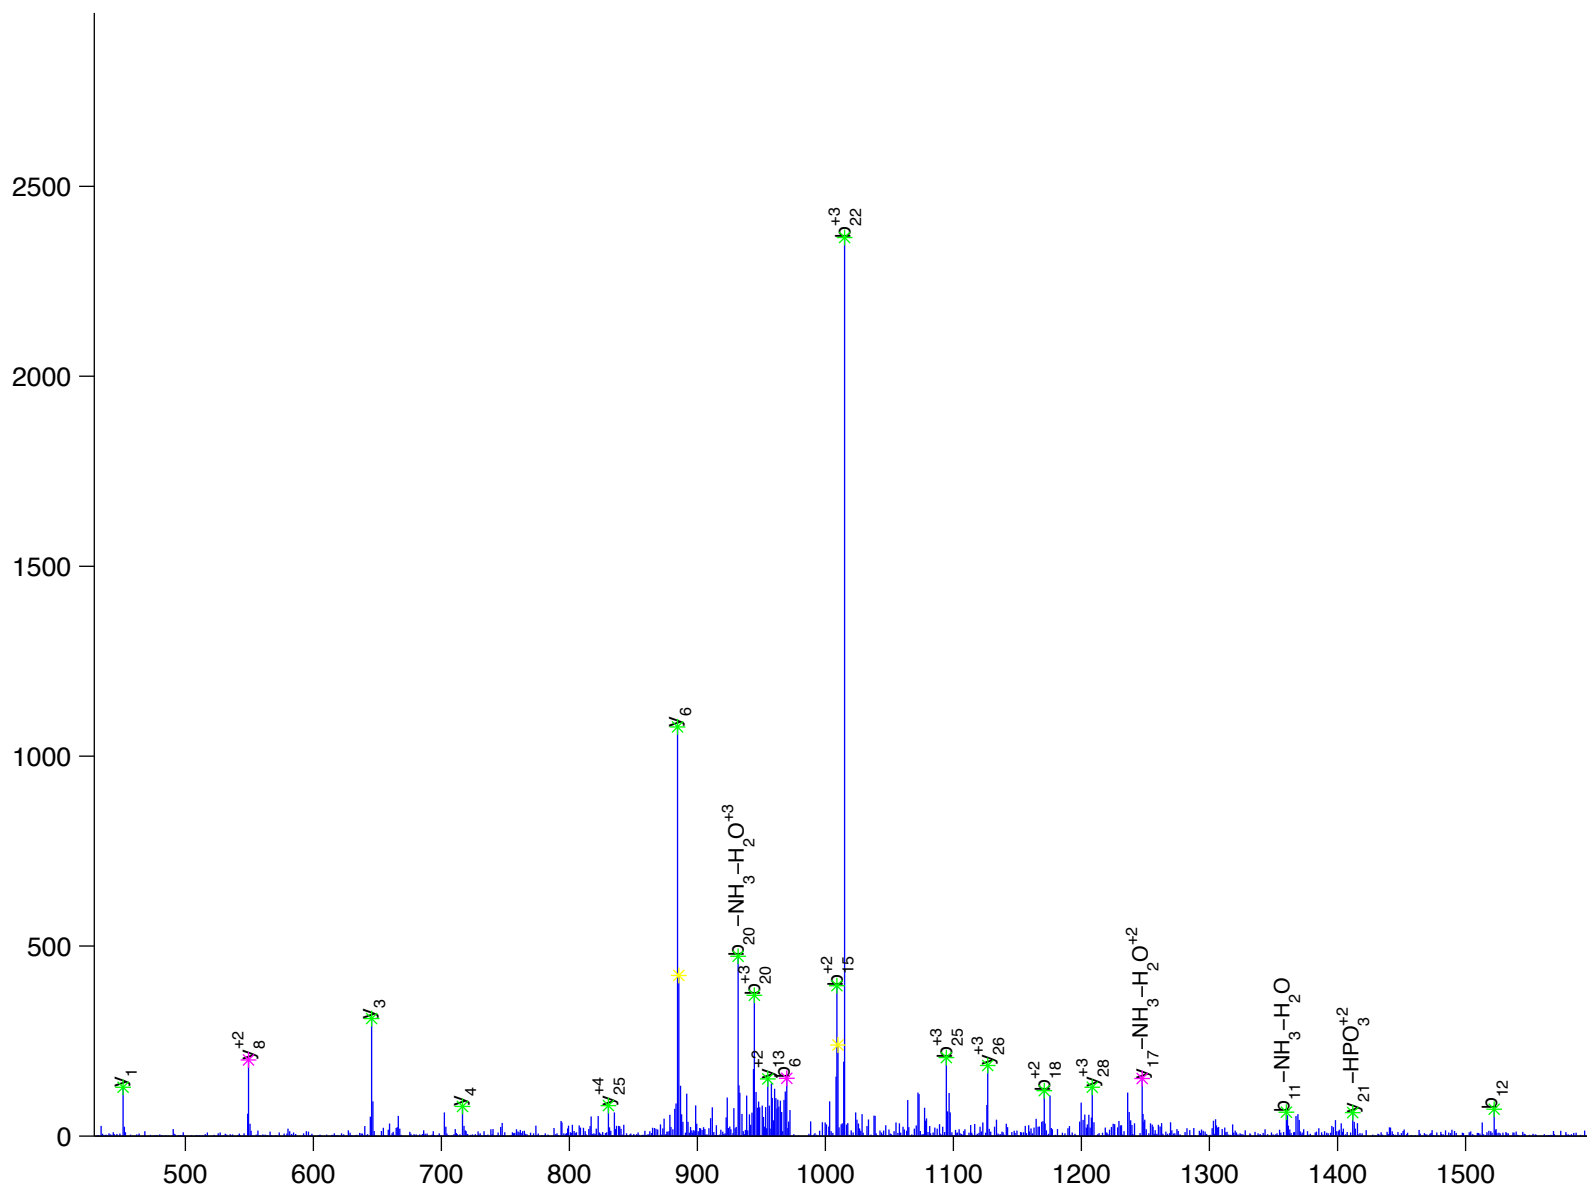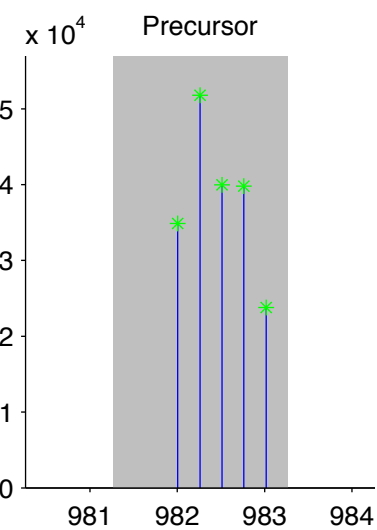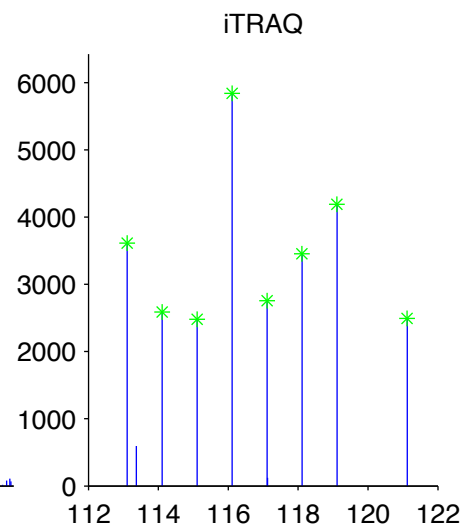

Y [ M ] [ E ] [ D ] [ s ] [ T ] [ Y ] [ y ] K

PTK2 protein tyrosine kinase 2

Charge State: +2

Scan Number: 5132

File Name: 091130ptp1blivers\_hfd\_basal2.raw

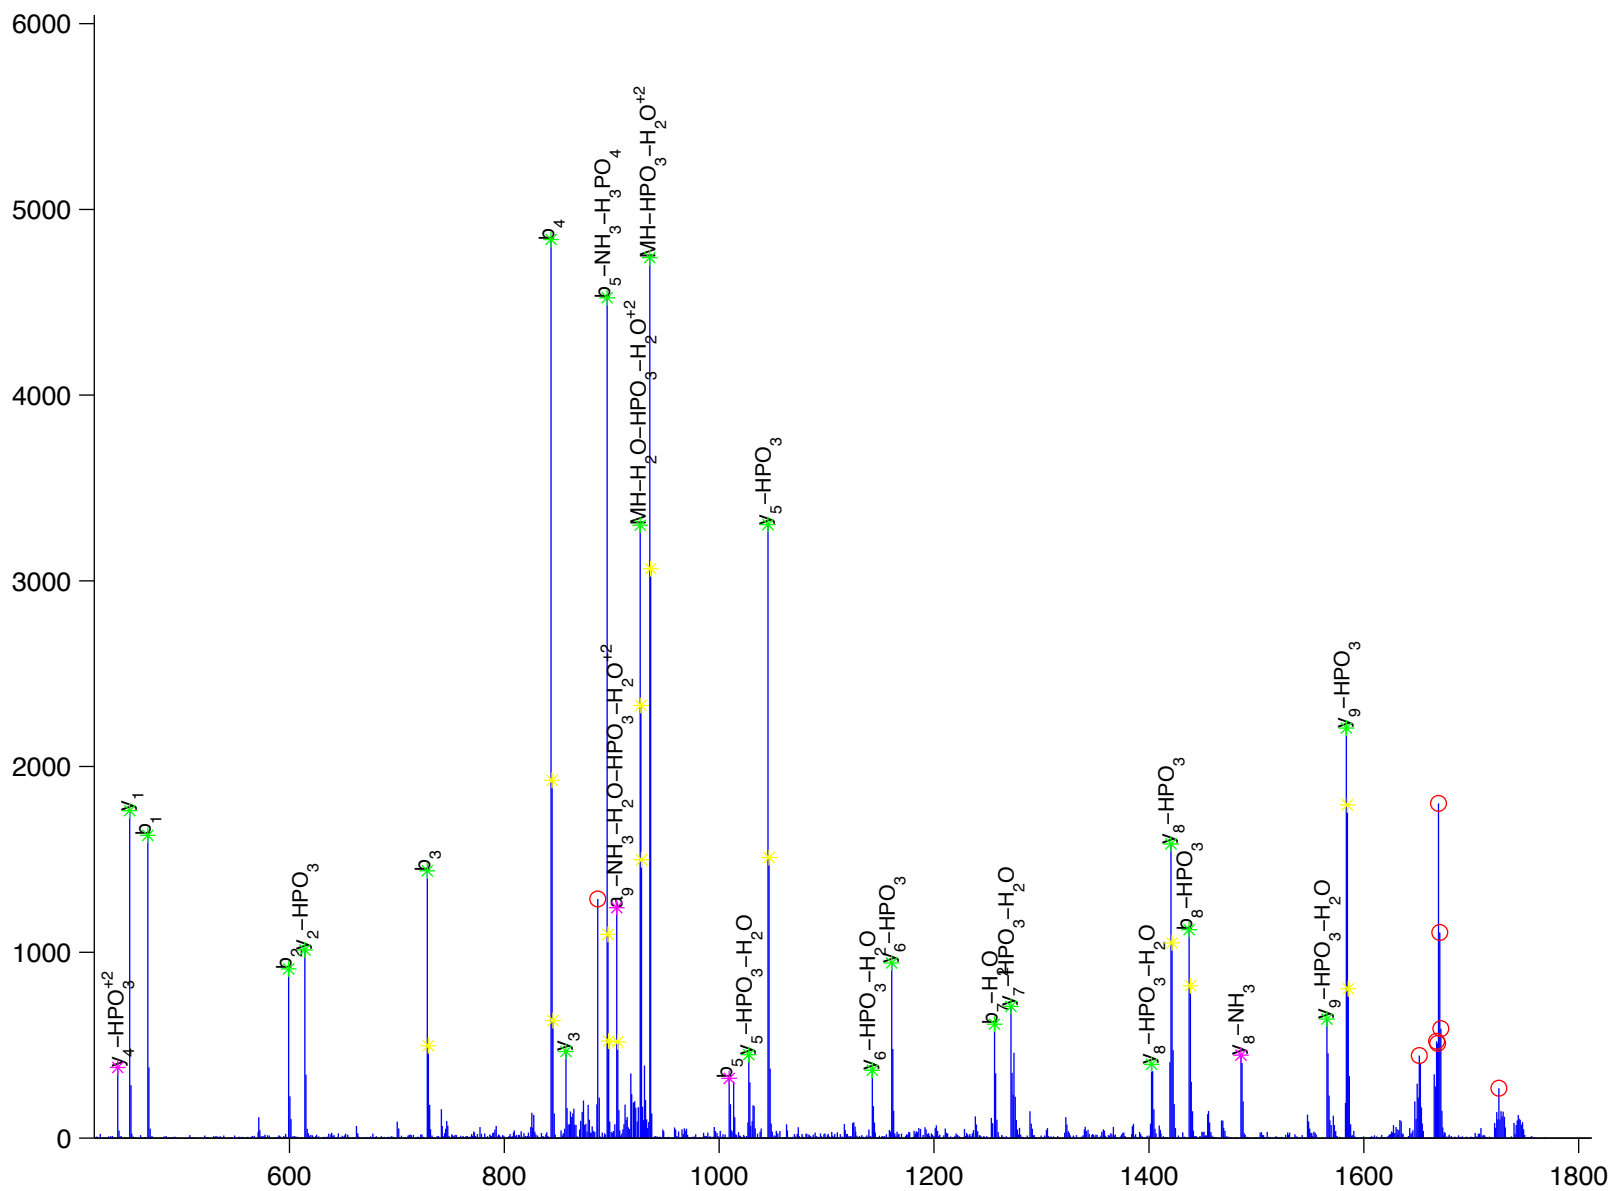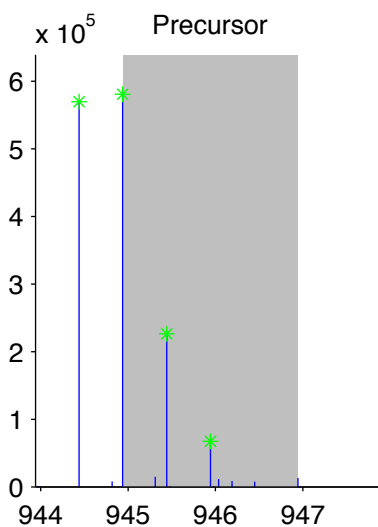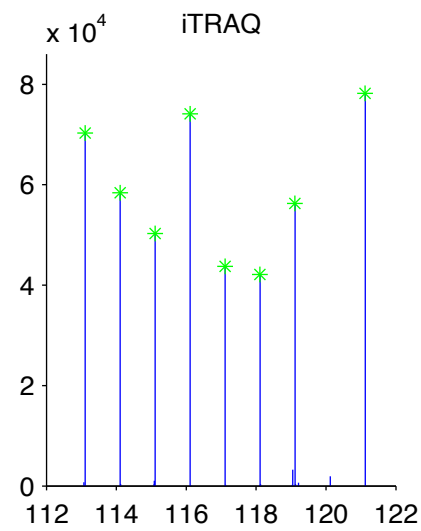

Y [ M ] [ E ] [ D ] [ S ] t [ Y ] y [ K ]

PTK2 protein tyrosine kinase 2

Charge State: +2

Scan Number: 5132

File Name: 091130ptp1blivers\_hfd\_basal2.raw

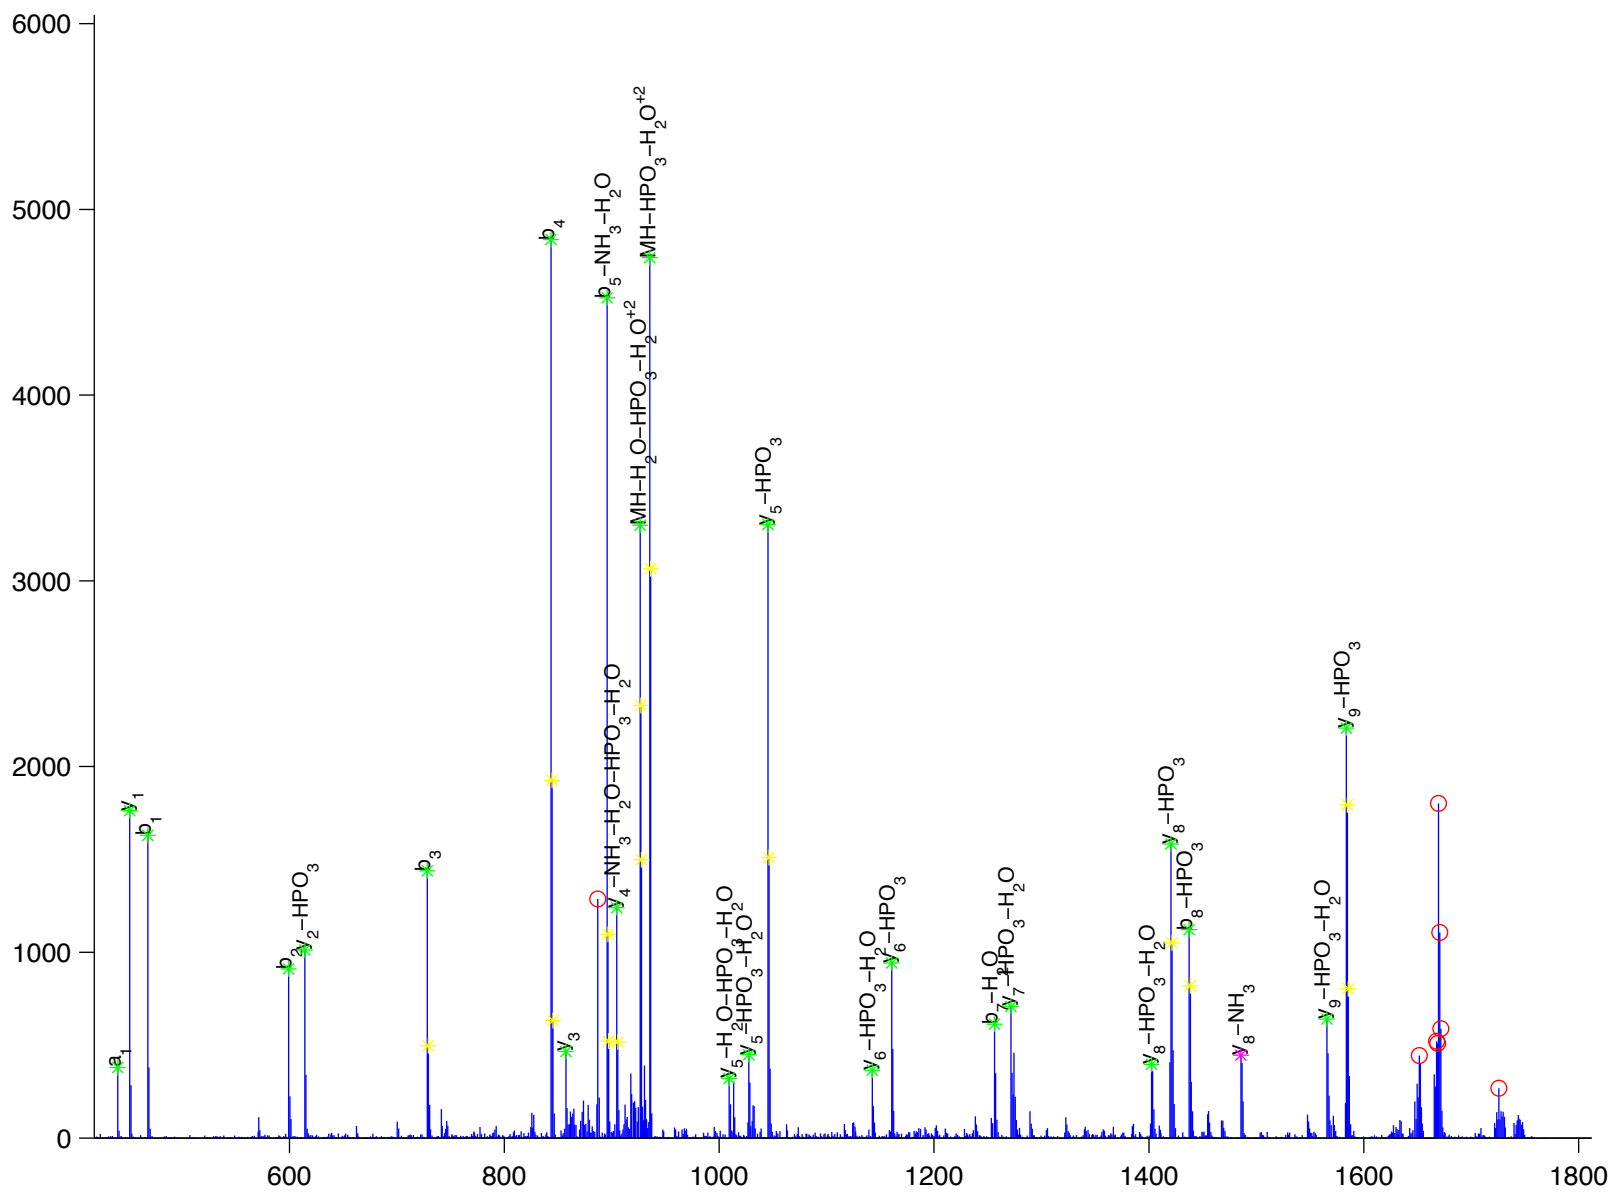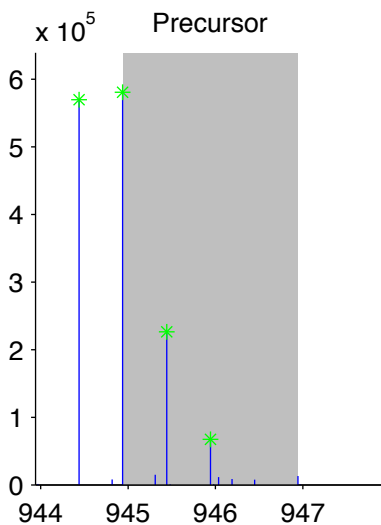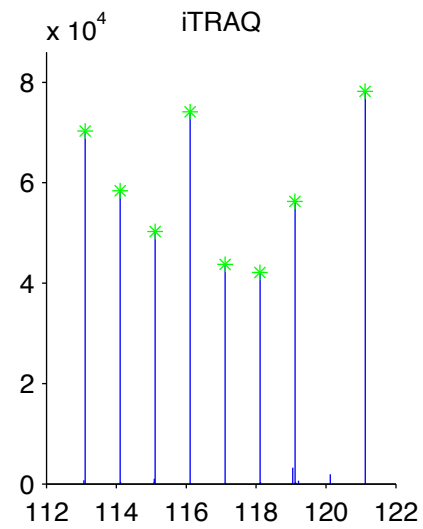

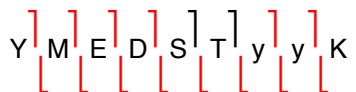

PTK2 protein tyrosine kinase 2

Charge State: +2

Scan Number: 5132

File Name: 091130ptp1blivers\_hfd\_basal2.raw

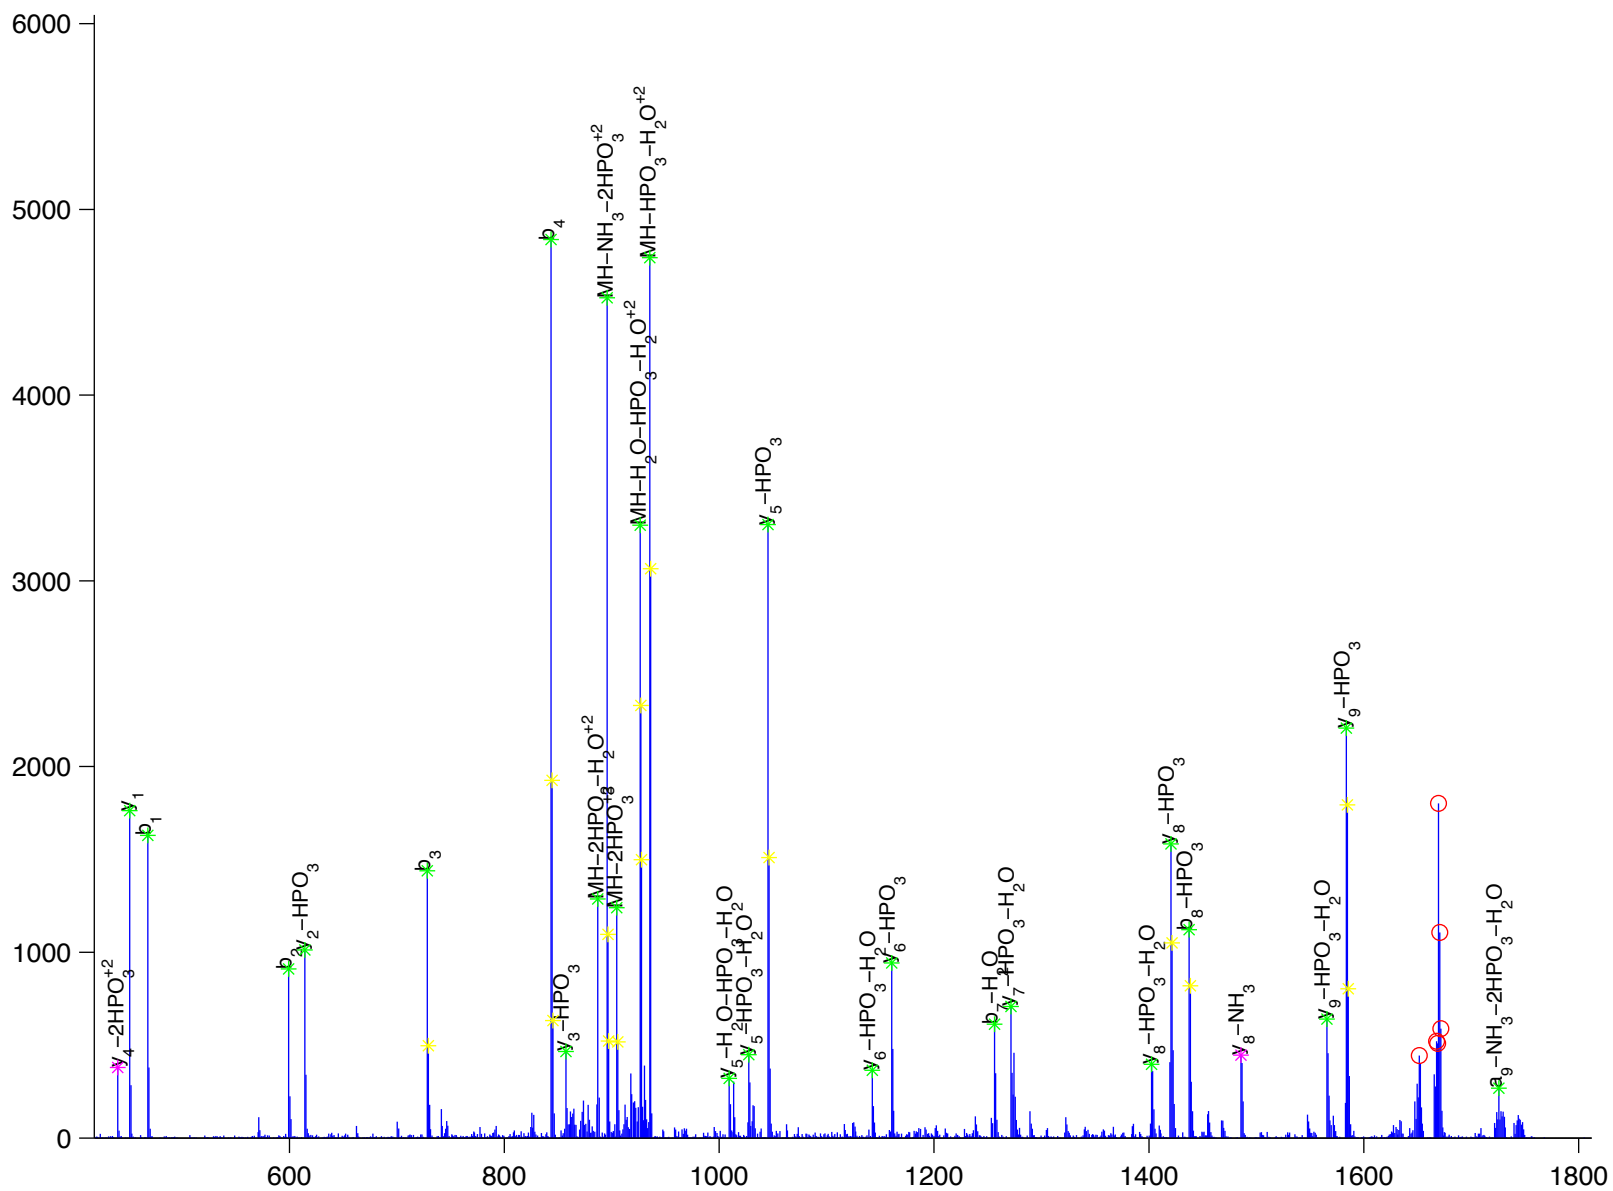

Y [ M ] [ E ] [ D ] [ S ] [ T ] [ Y ] [ y ] K

PTK2 protein tyrosine kinase 2

Charge State: +2

Scan Number: 5132

File Name: 091130ptp1blivers\_hfd\_basal2.raw

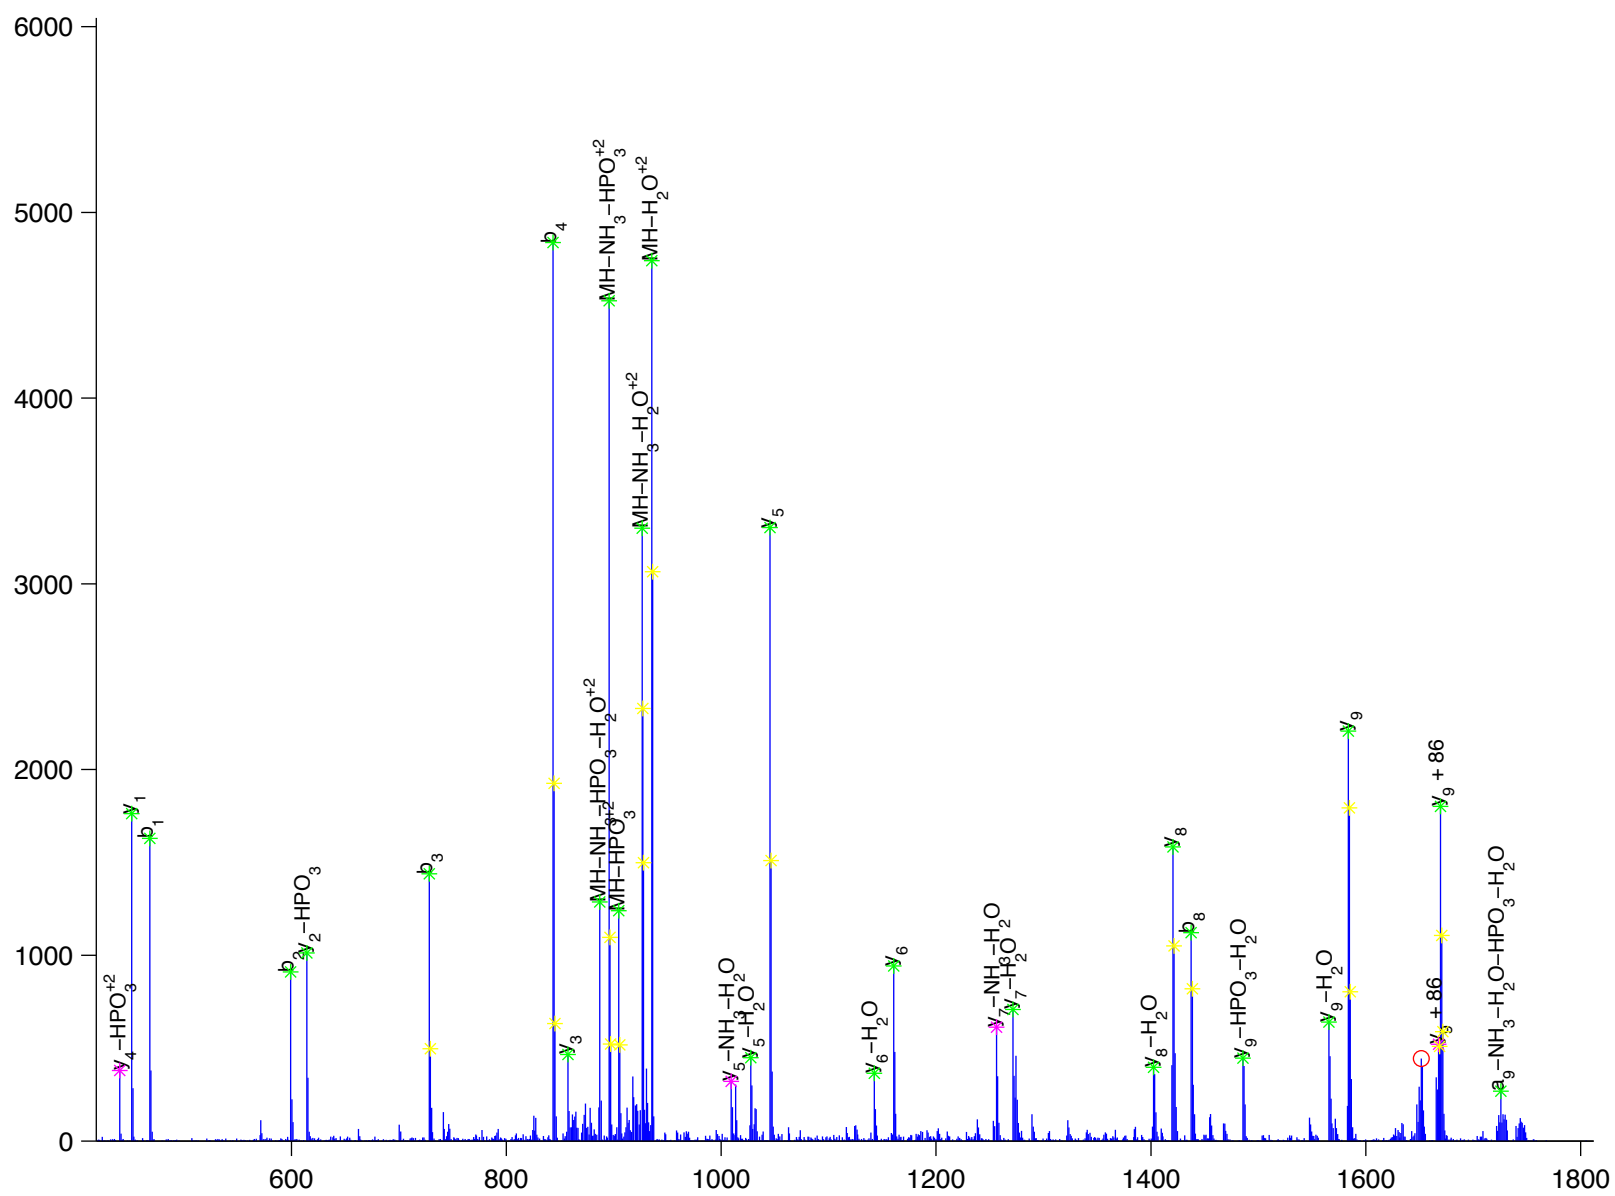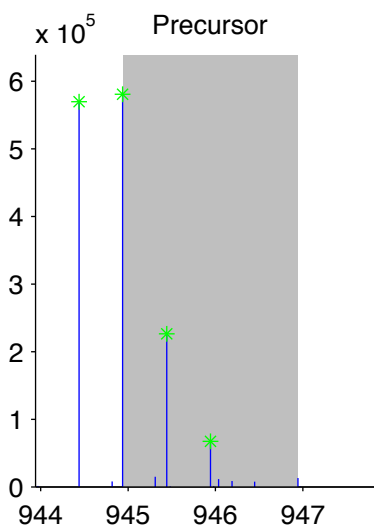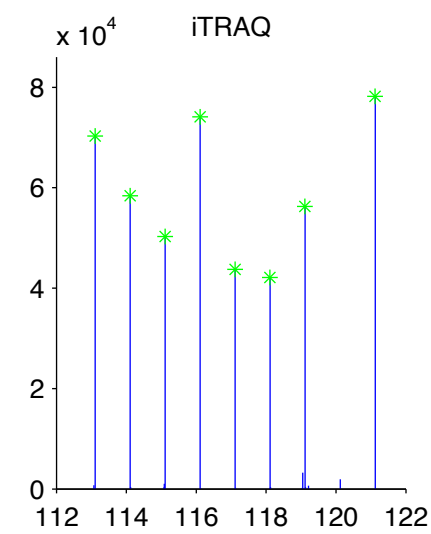



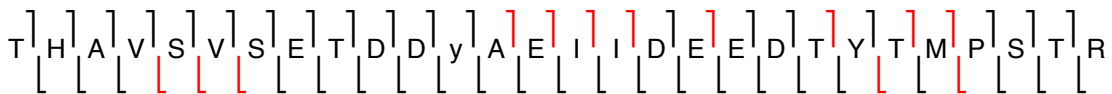

PTK2 protein tyrosine kinase 2

Charge State: +4

Scan Number: 6808

File Name: 090806ptp1blivers\_M\_NC2.raw

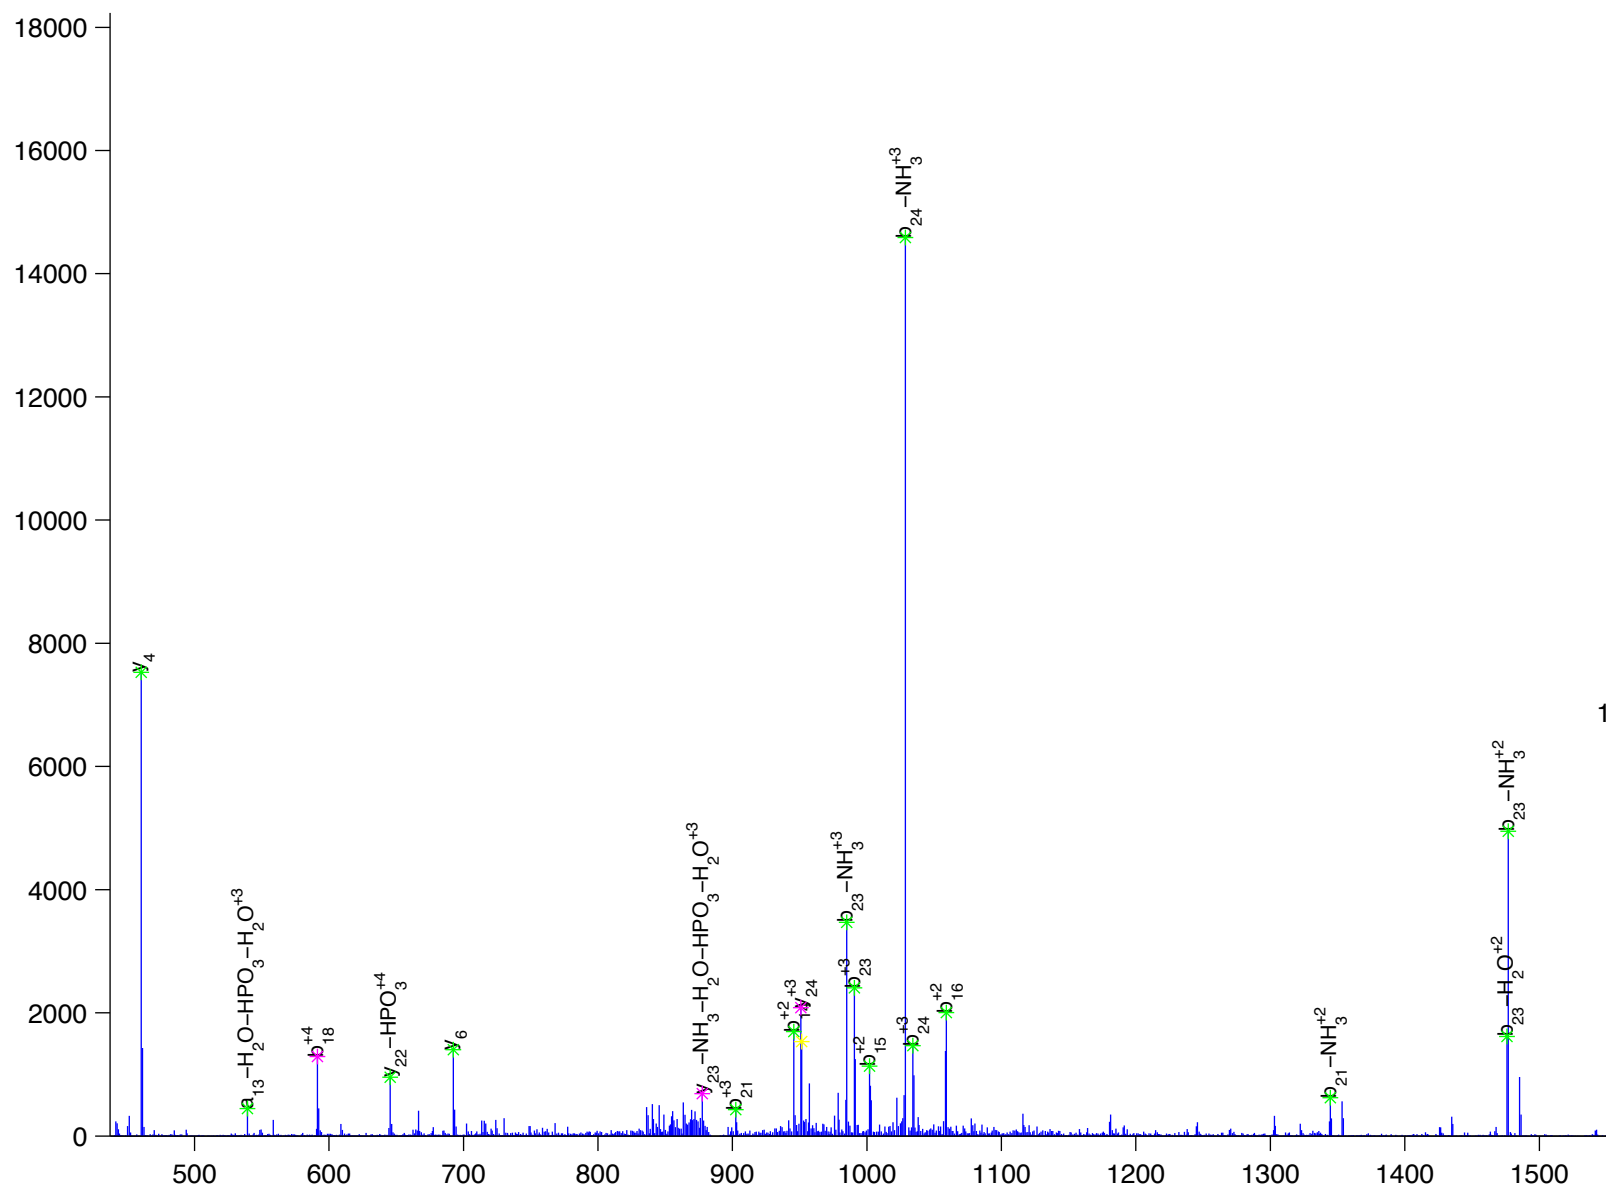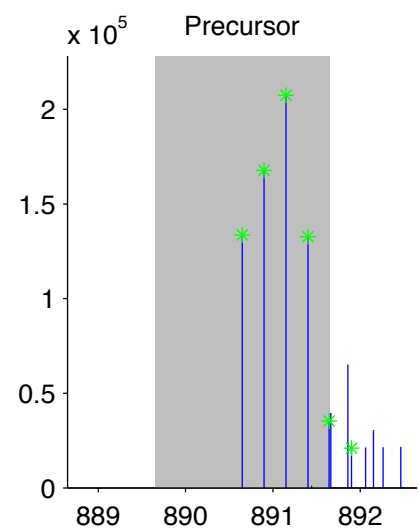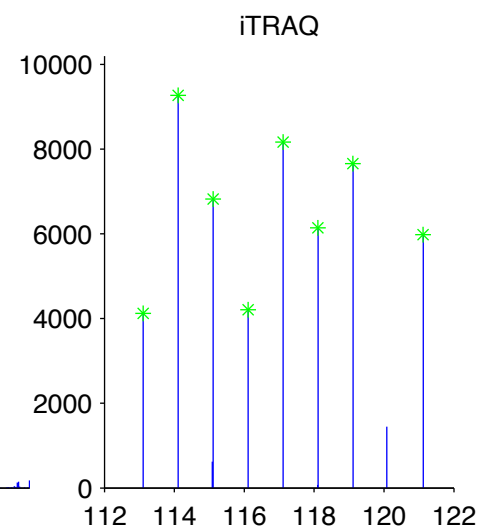

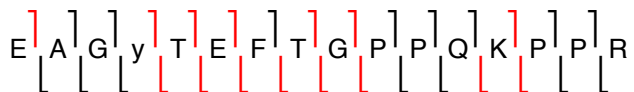

PTK2 protein tyrosine kinase 2 beta

Charge State: +4

Scan Number: 4519

File Name: 091130ptp1blivers\_hfd\_basal2.raw

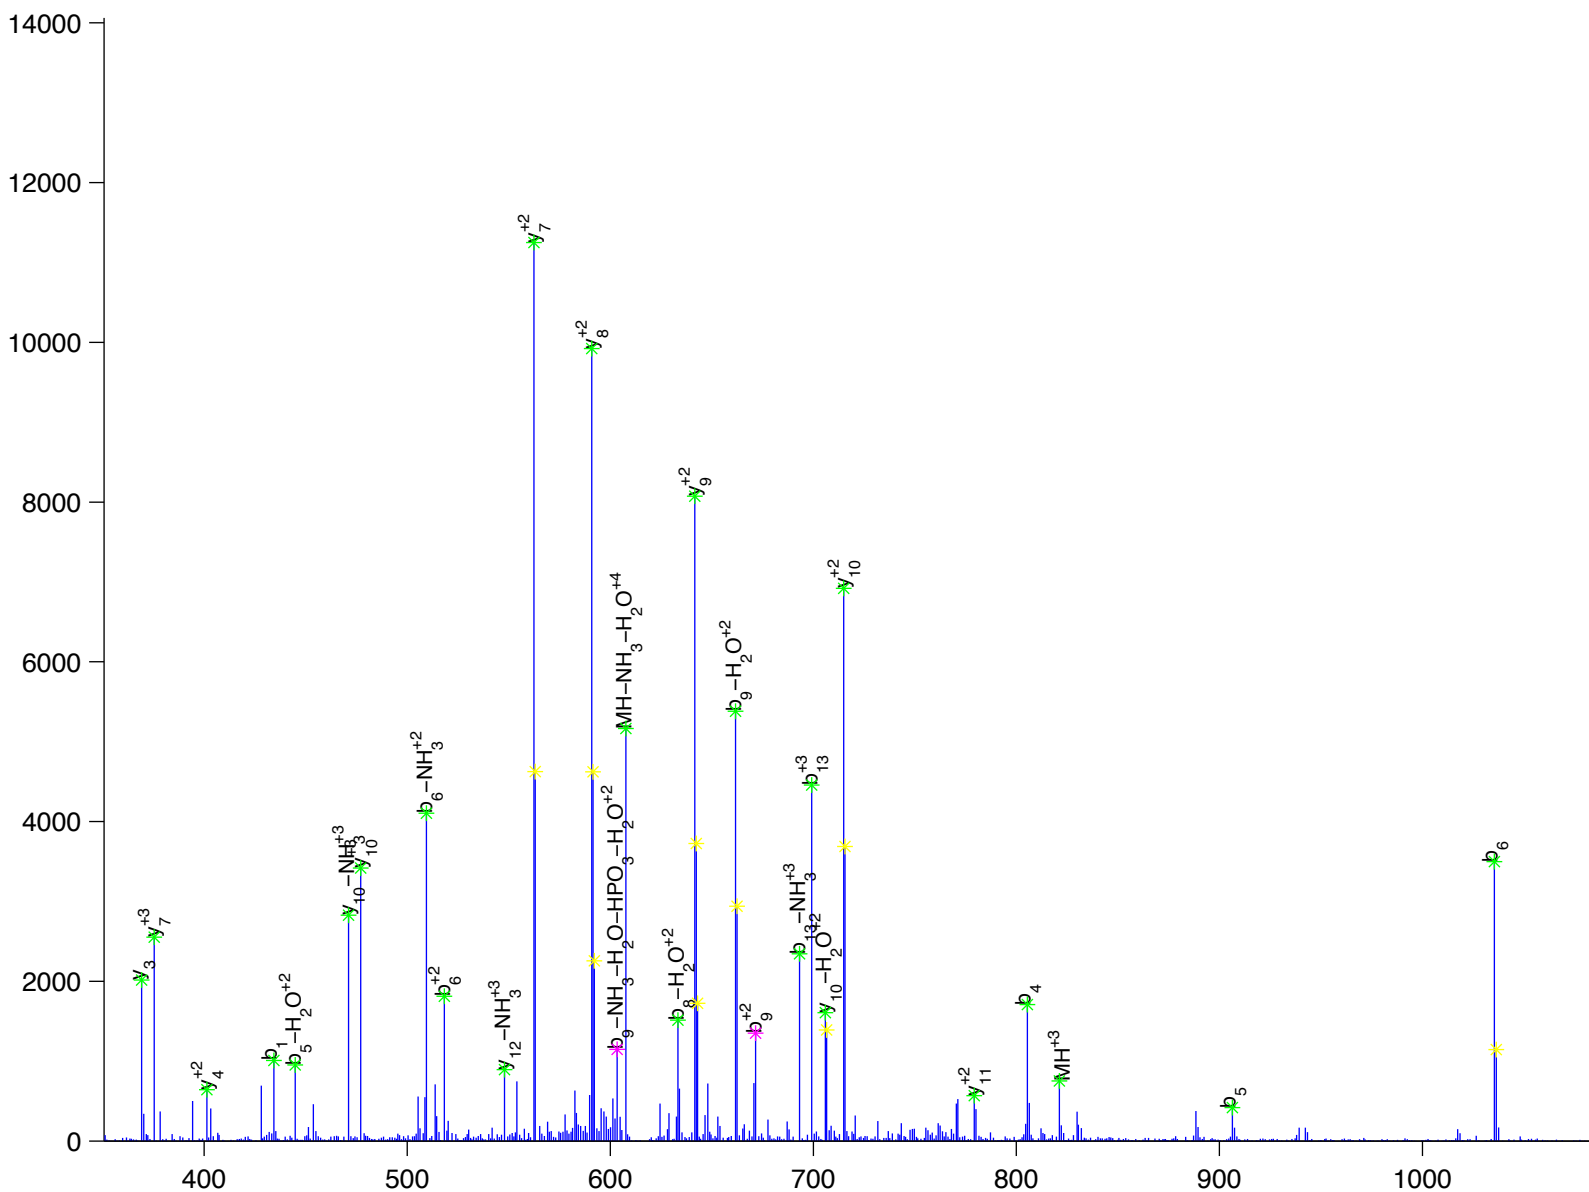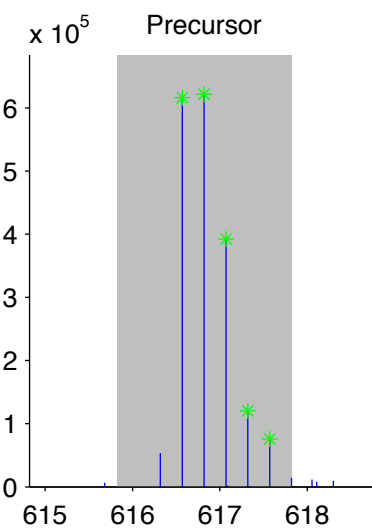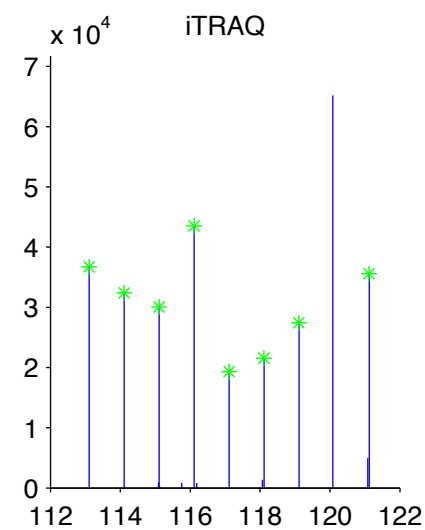

Y I E D E D y Y K A S V T R

PTK2 protein tyrosine kinase 2 beta

Charge State: +3

Scan Number: 4934

File Name: 090806ptp1blivers\_M\_NC2.raw

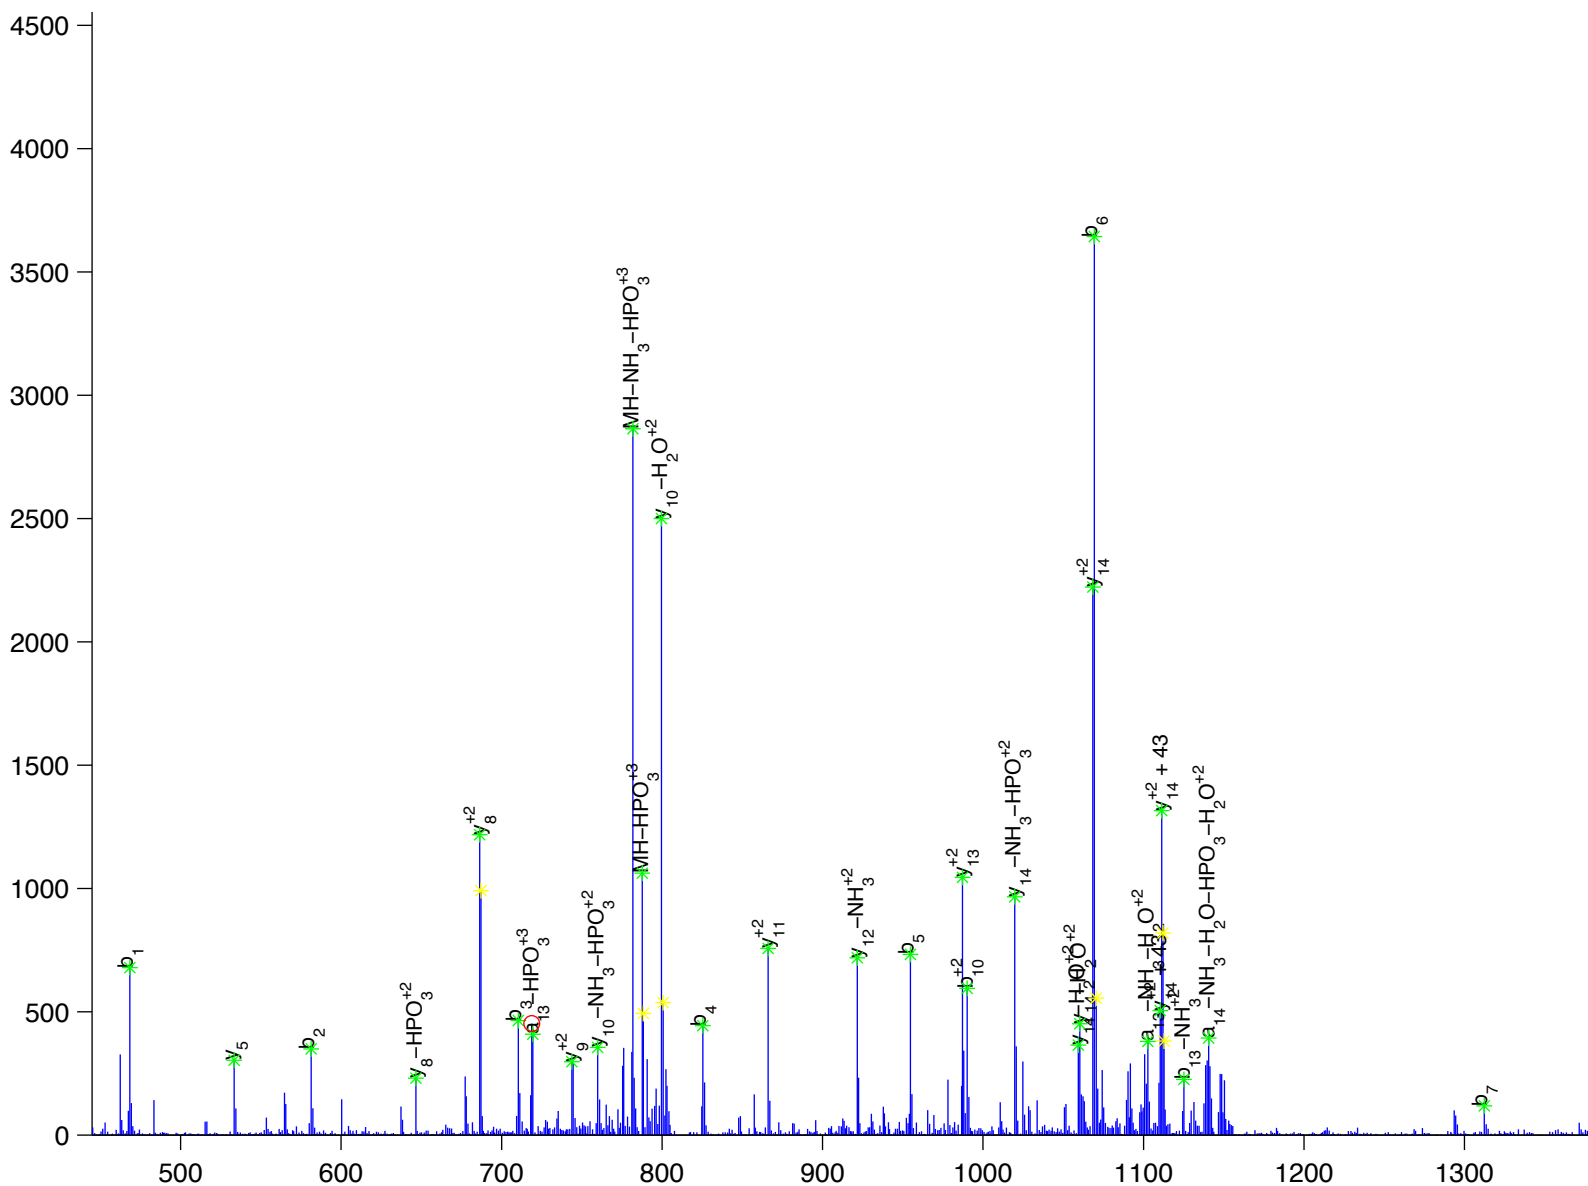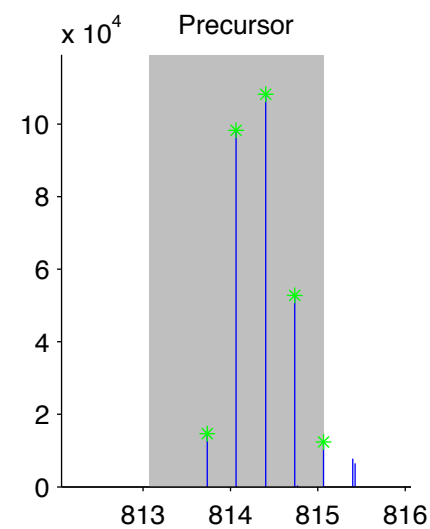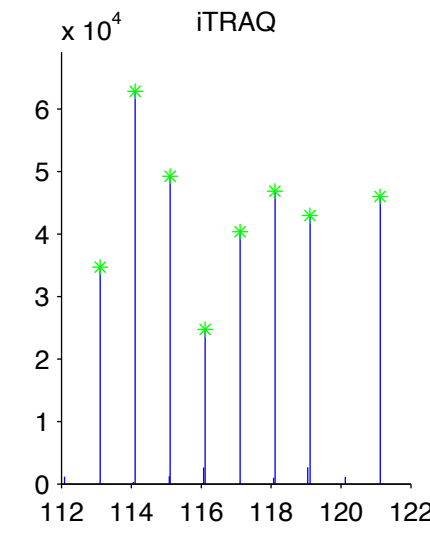

Y I E D E D y y K A S V T R

PTK2 protein tyrosine kinase 2 beta  
Charge State: +3  
Scan Number: 5197  
File Name: 091130ptp1blivers\_hfd\_basal2.raw

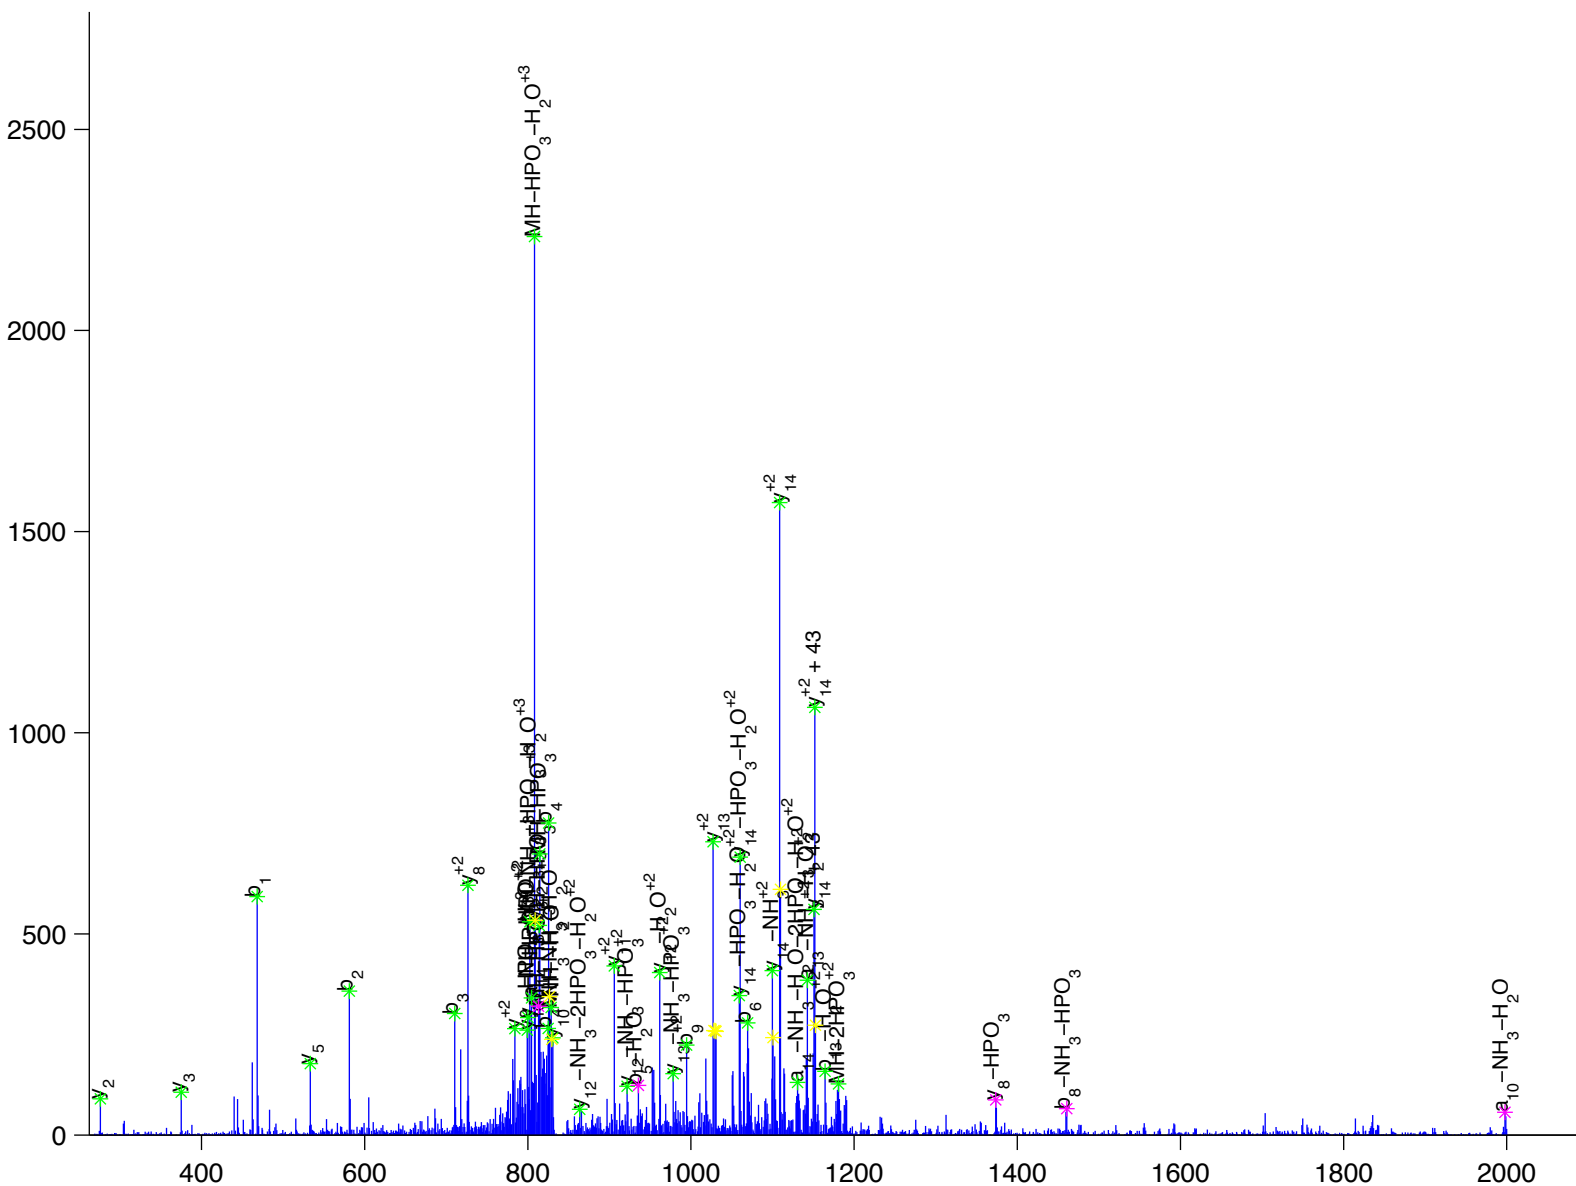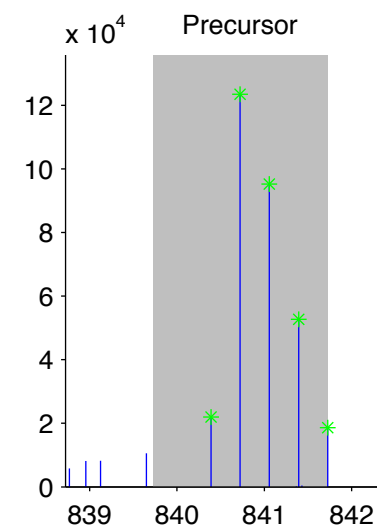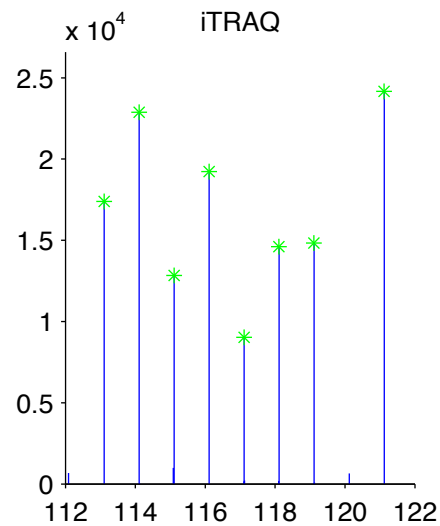

Y I E D E D y Y K

PTK2 protein tyrosine kinase 2 beta

Charge State: +3

Scan Number: 5422

File Name: 091130ptp1blivers\_hfd\_basal2.raw

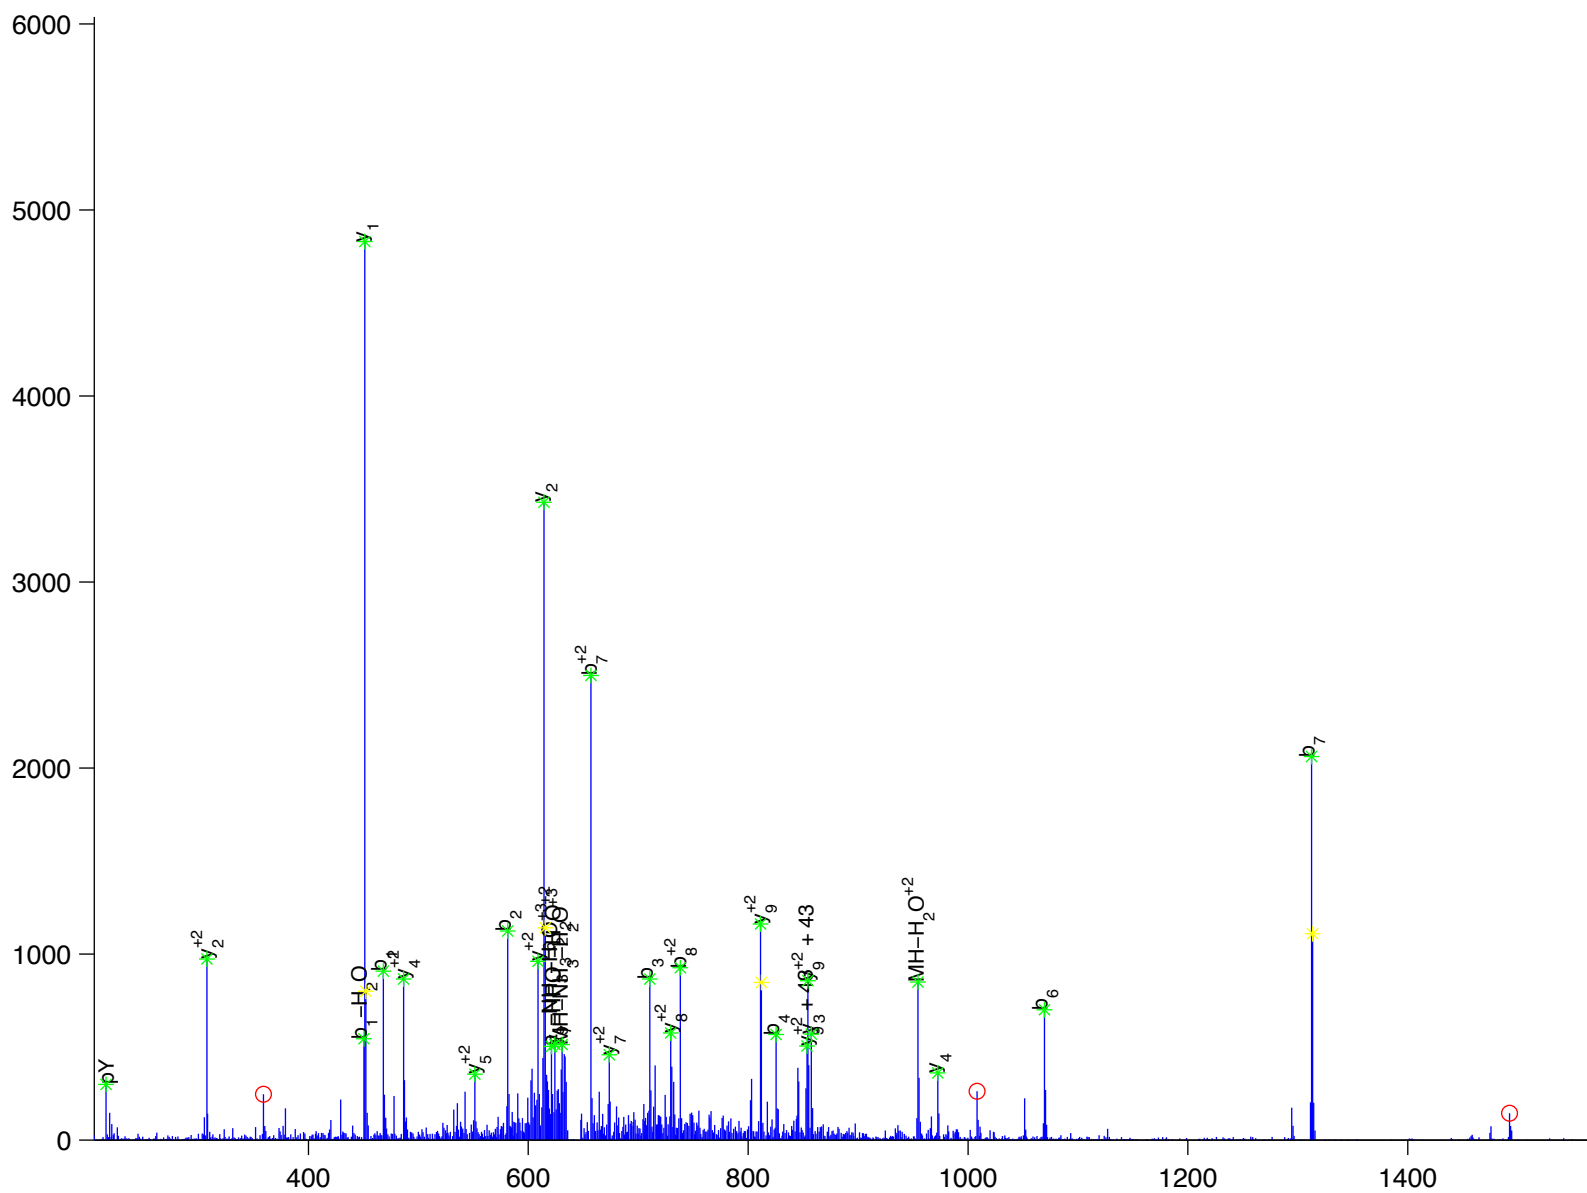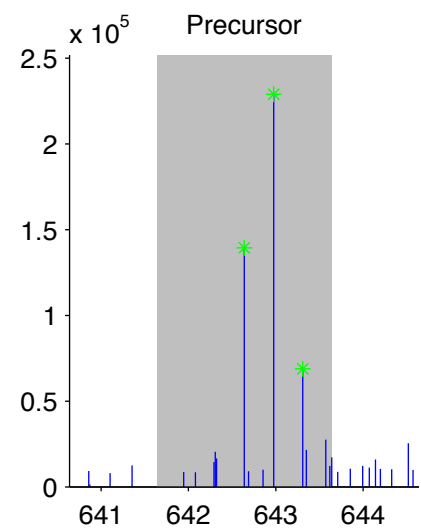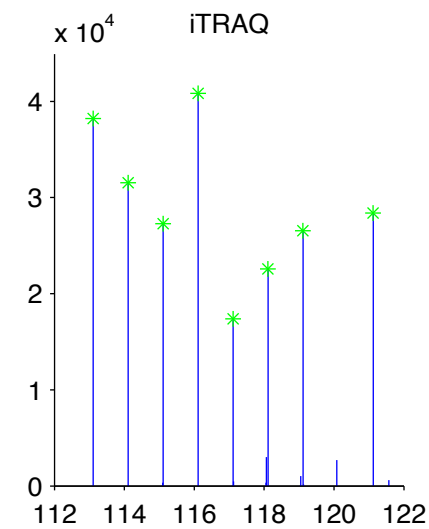

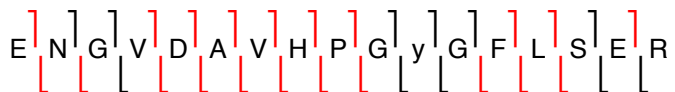

pyruvate carboxylase

Charge State: +3

Scan Number: 4497

File Name: 100905ptp1blivers\_ncHFD\_basal.raw

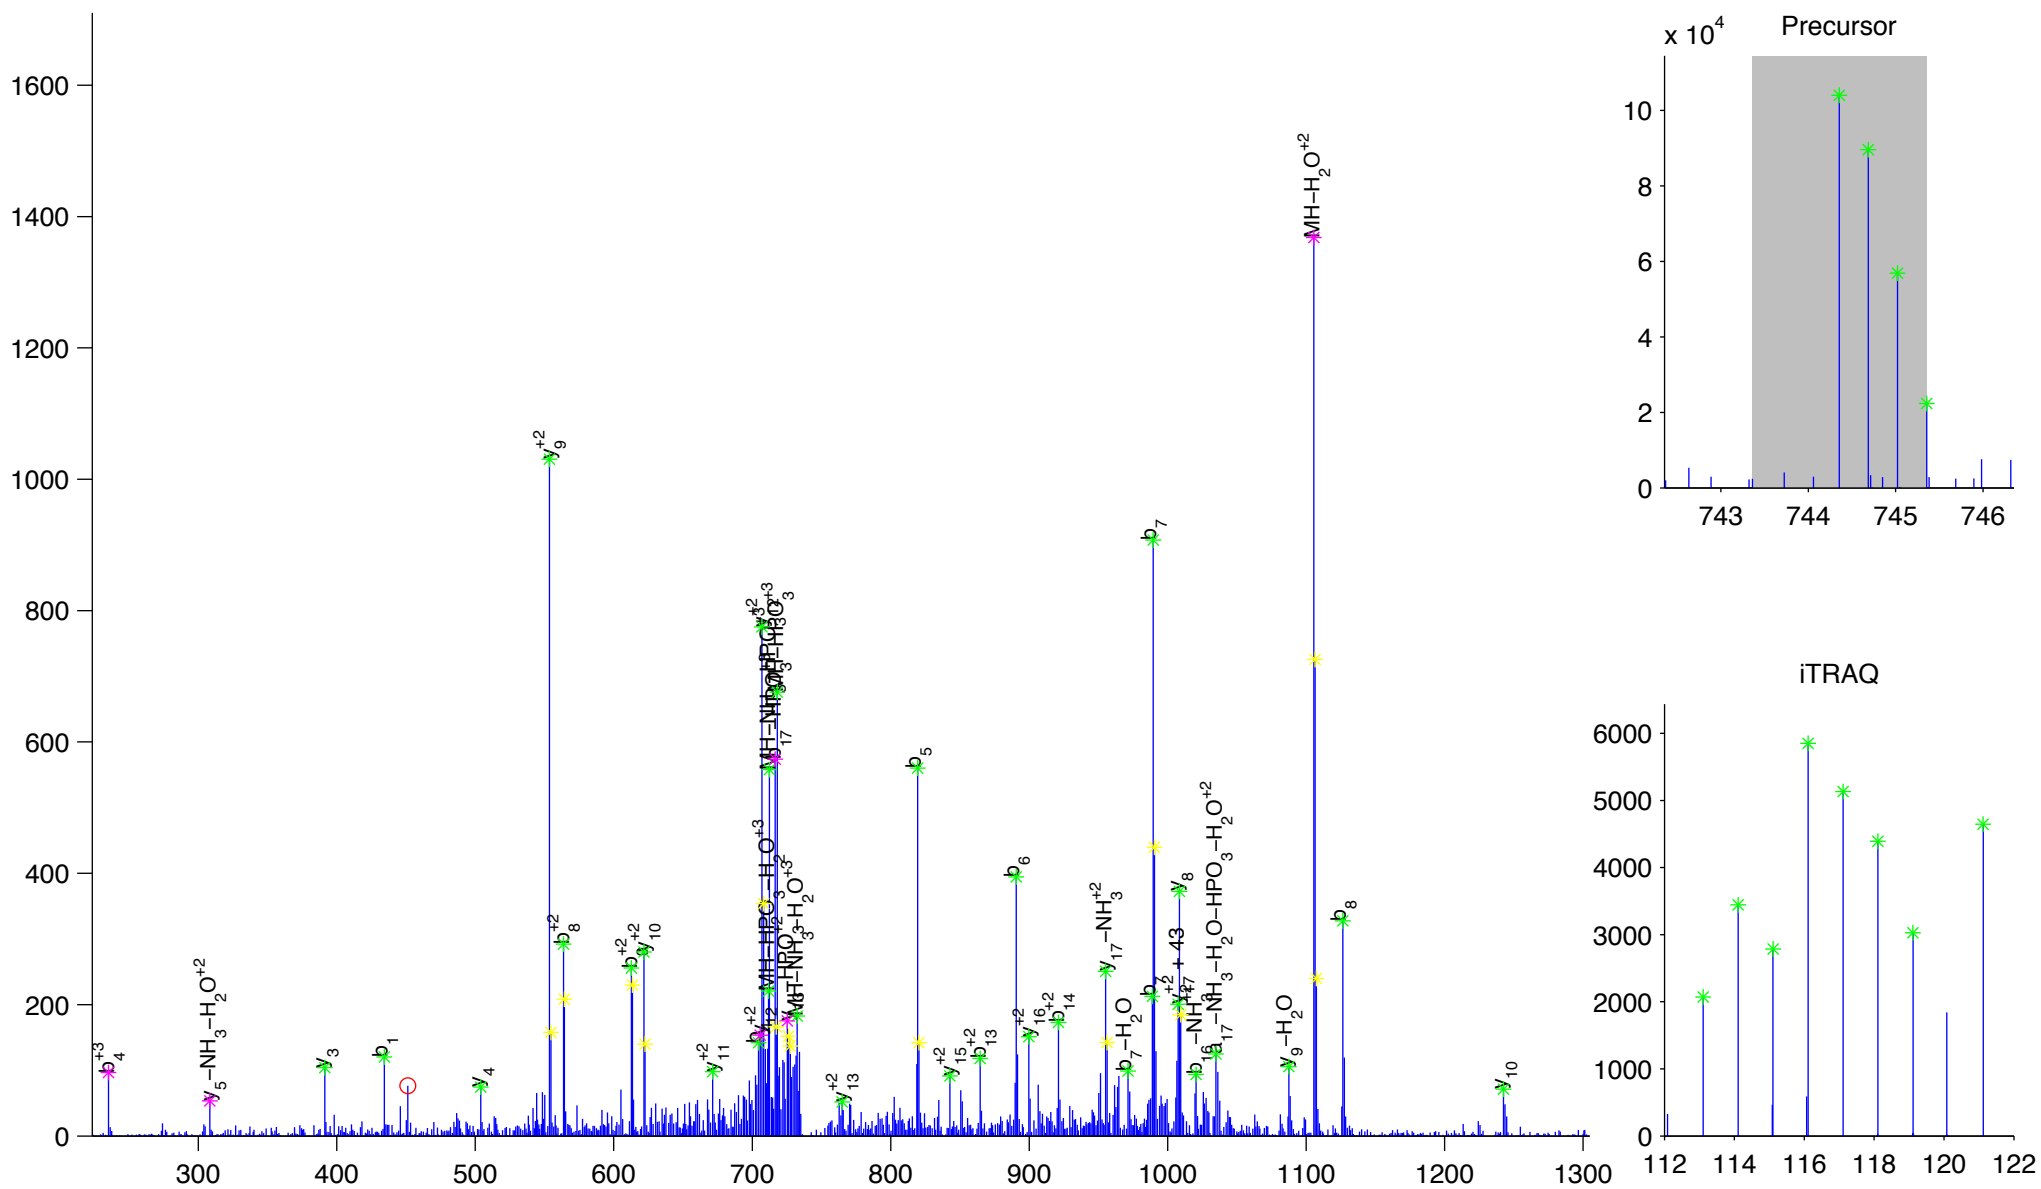

V[F]L[L]G[E]E[V]A[Q]Y[D]G[A]yK

pyruvate dehydrogenase (lipoamide) beta

Charge State: +3

Scan Number: 7708

File Name: 100905ptp1blivers\_ncHFD\_basal.raw

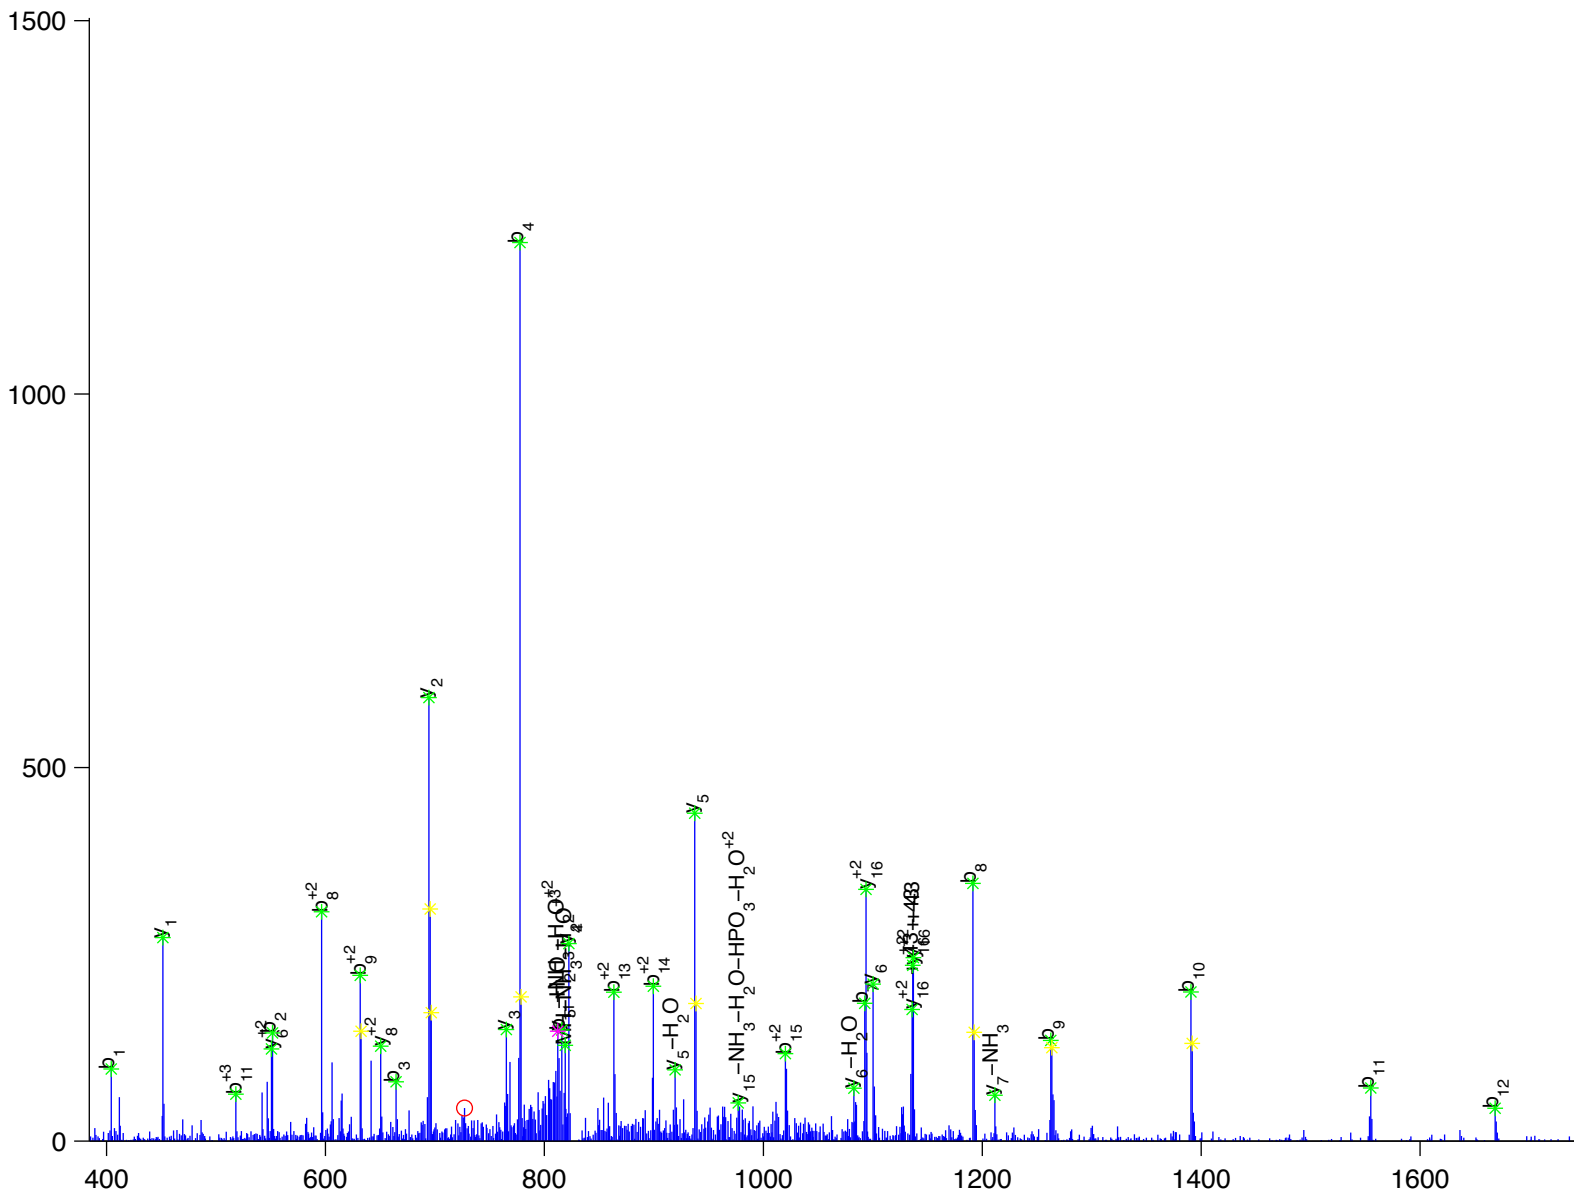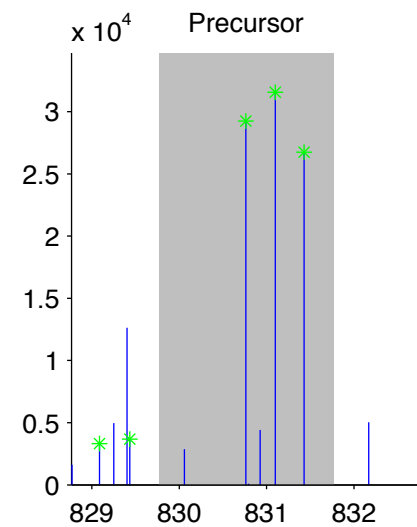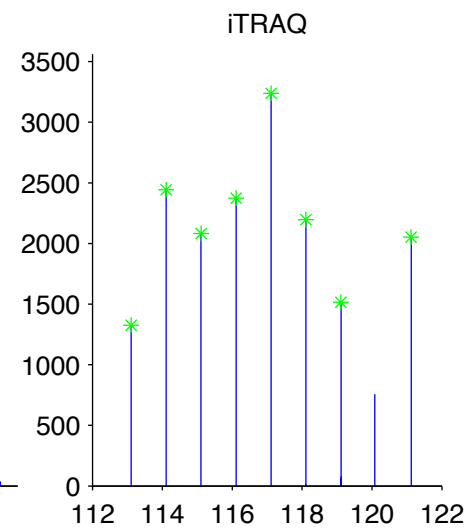

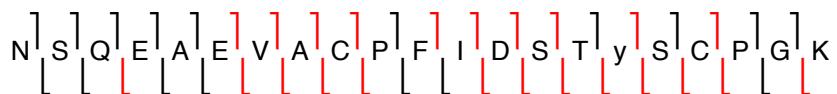

RanBP-type and C3HC4-type zinc finger containing 1

Charge State: +3

Scan Number: 6039

File Name: 091130ptp1blivers\_hfd\_basal2.raw

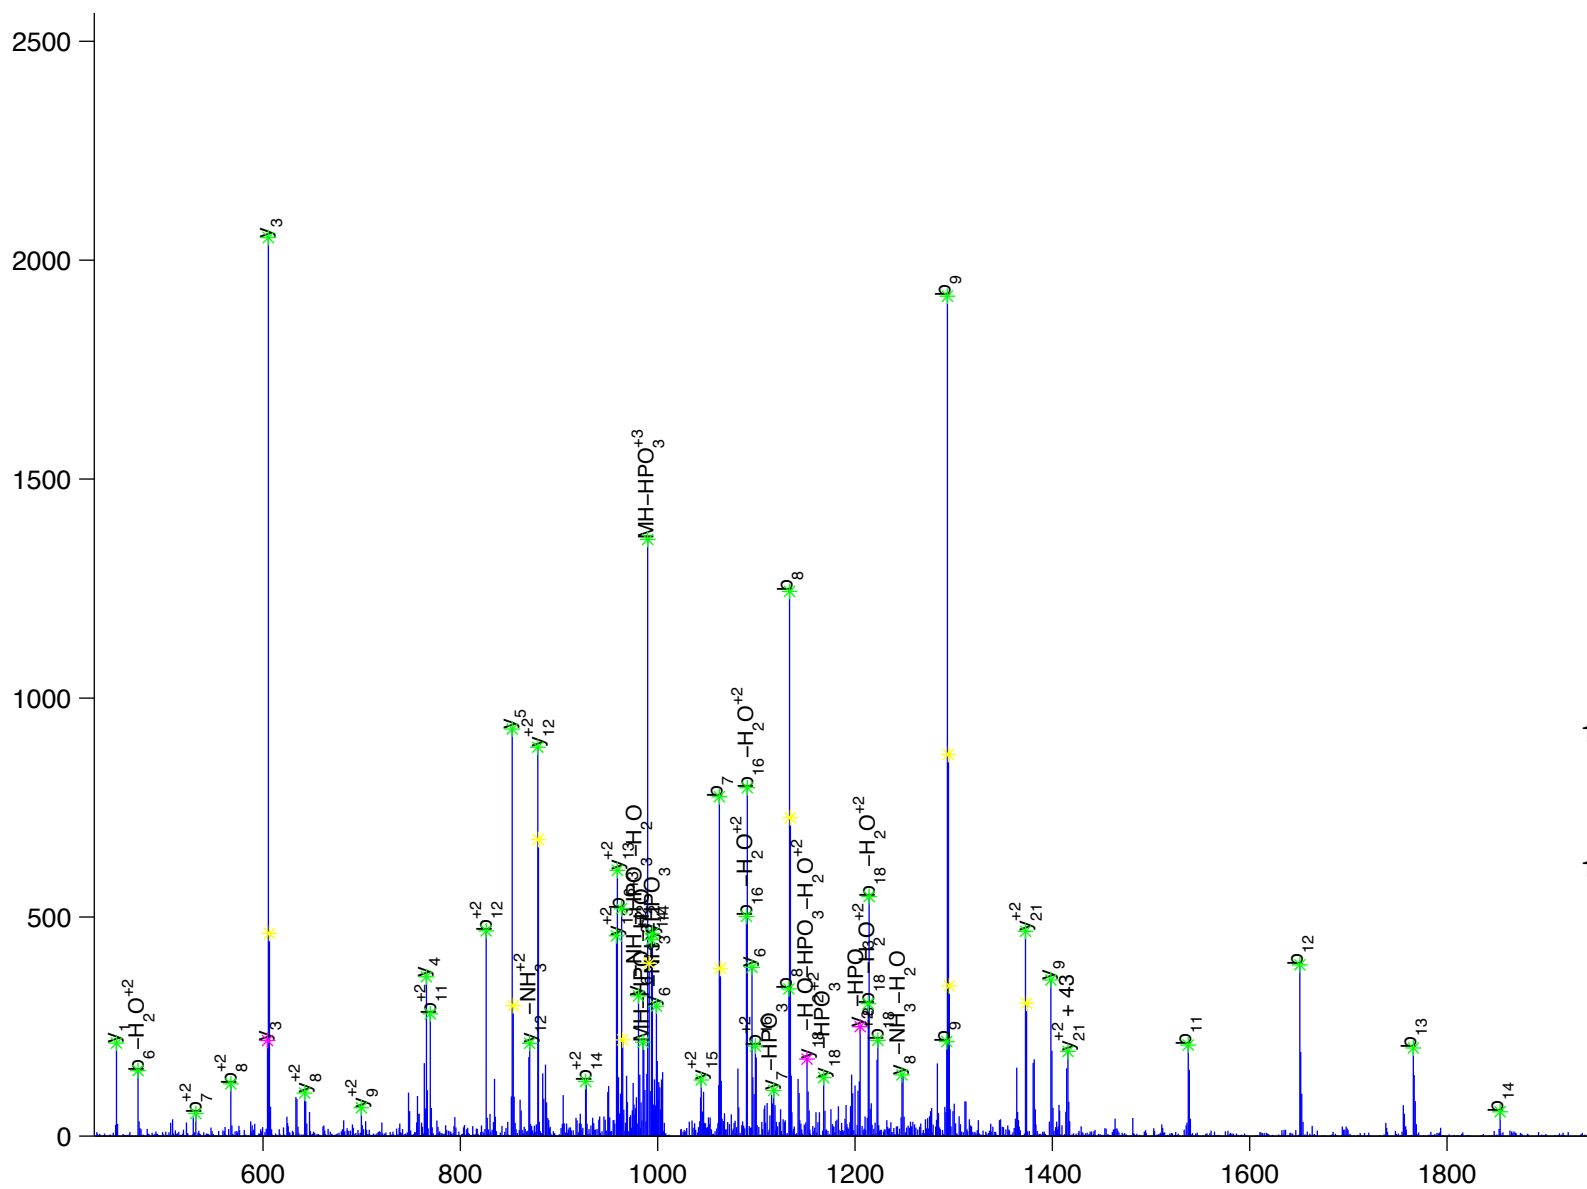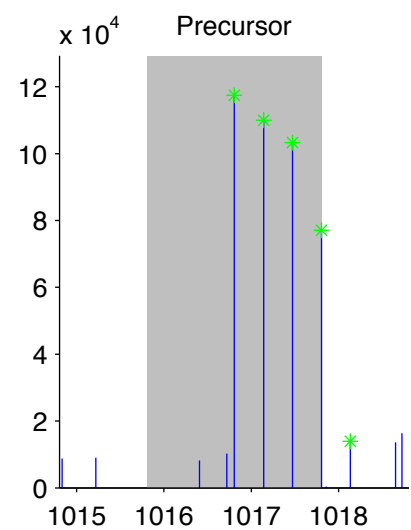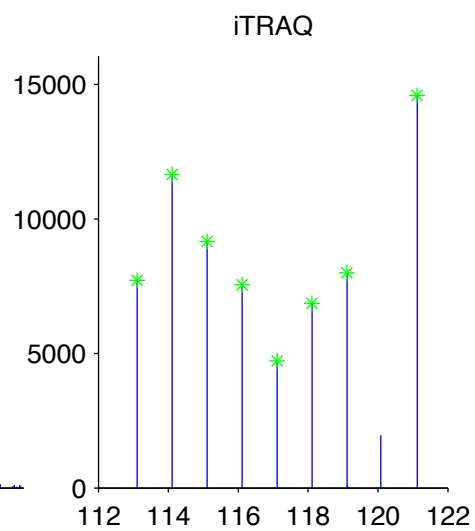



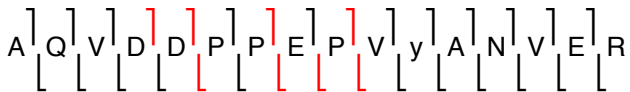

Rho GTPase activating protein 27 isoform 1

Charge State: +3

Scan Number: 3831

File Name: 100905ptp1blivers\_ncHFD\_basal.raw

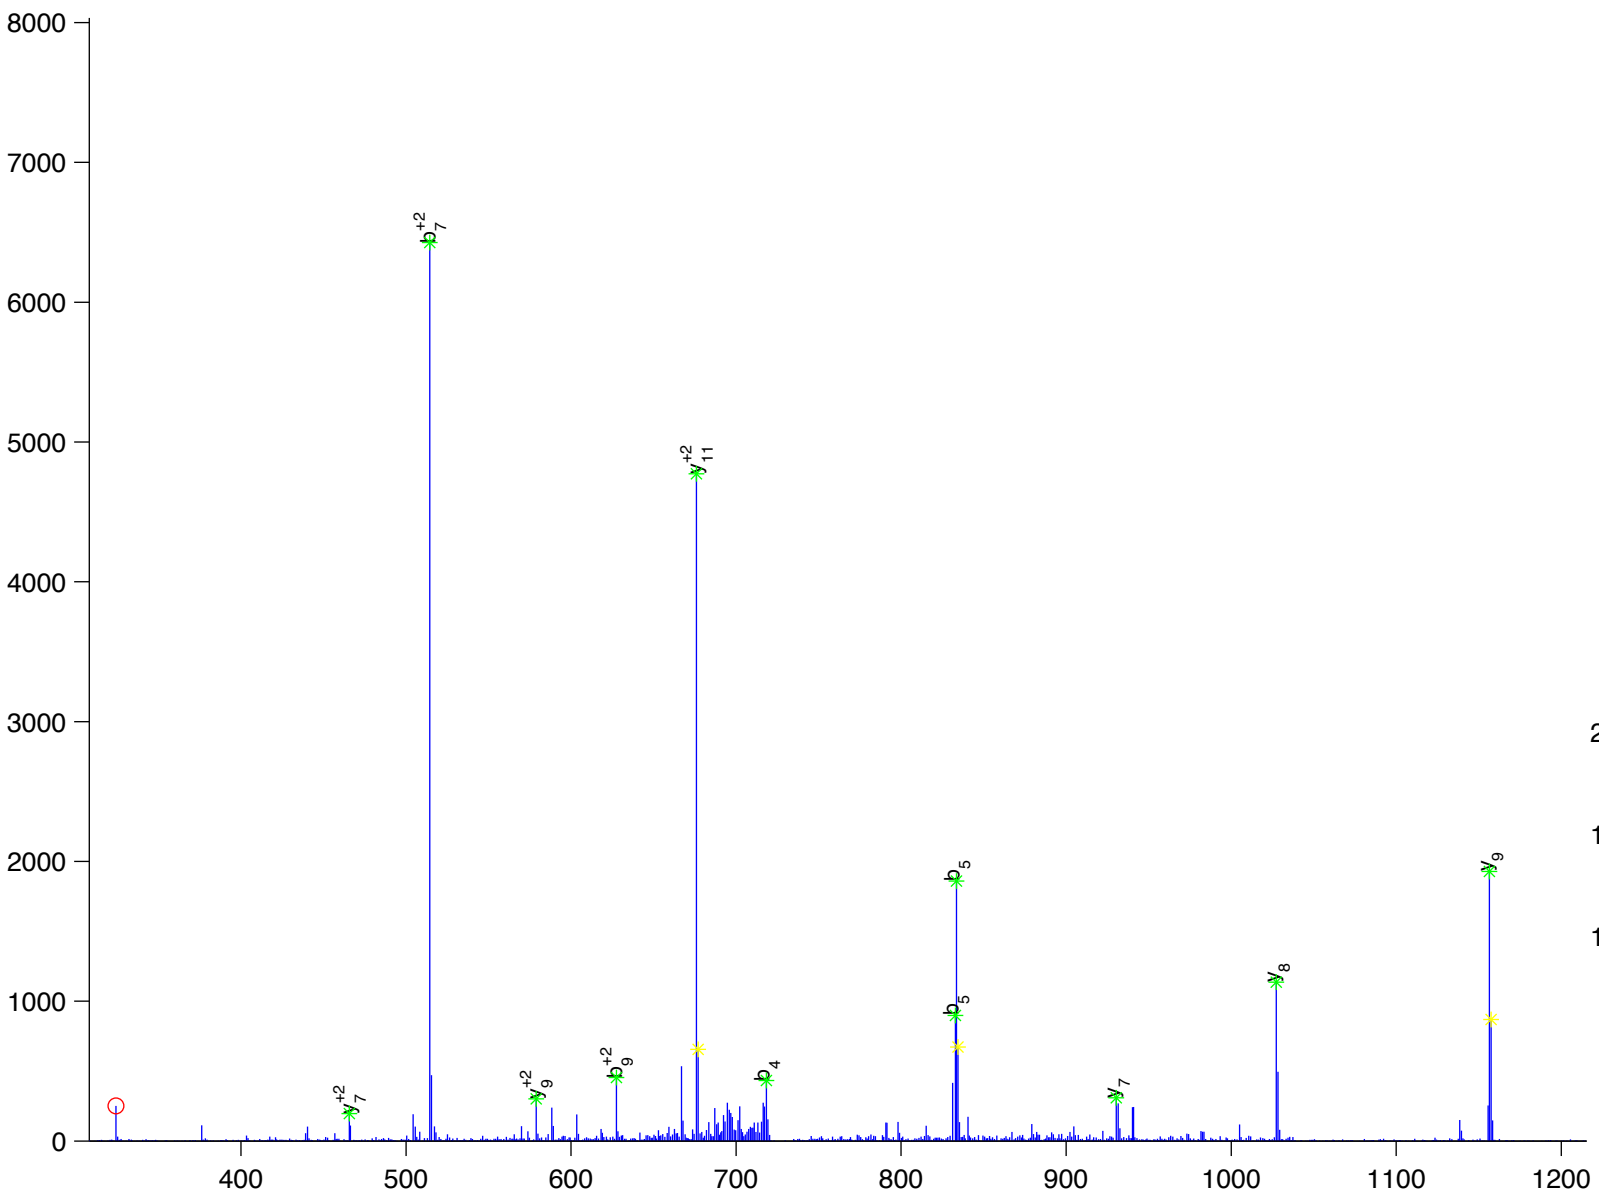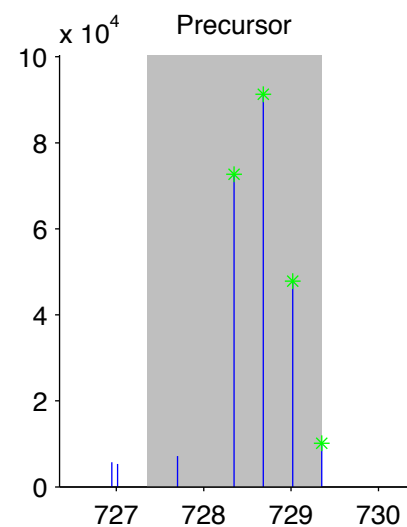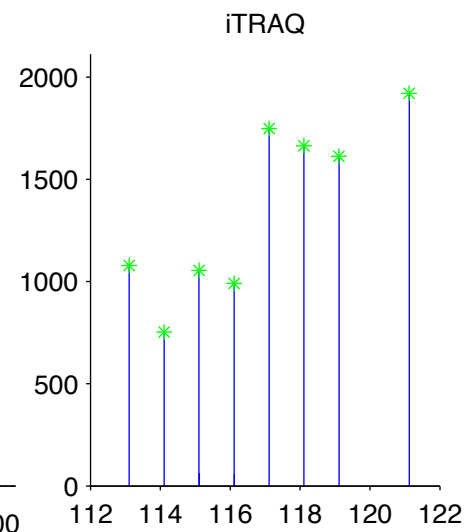

F [ A ] y [ L ] G [ R ]

ribosomal protein L13a

Charge State: +2

Scan Number: 6358

File Name: 091130ptp1blivers\_hfd\_basal2.raw

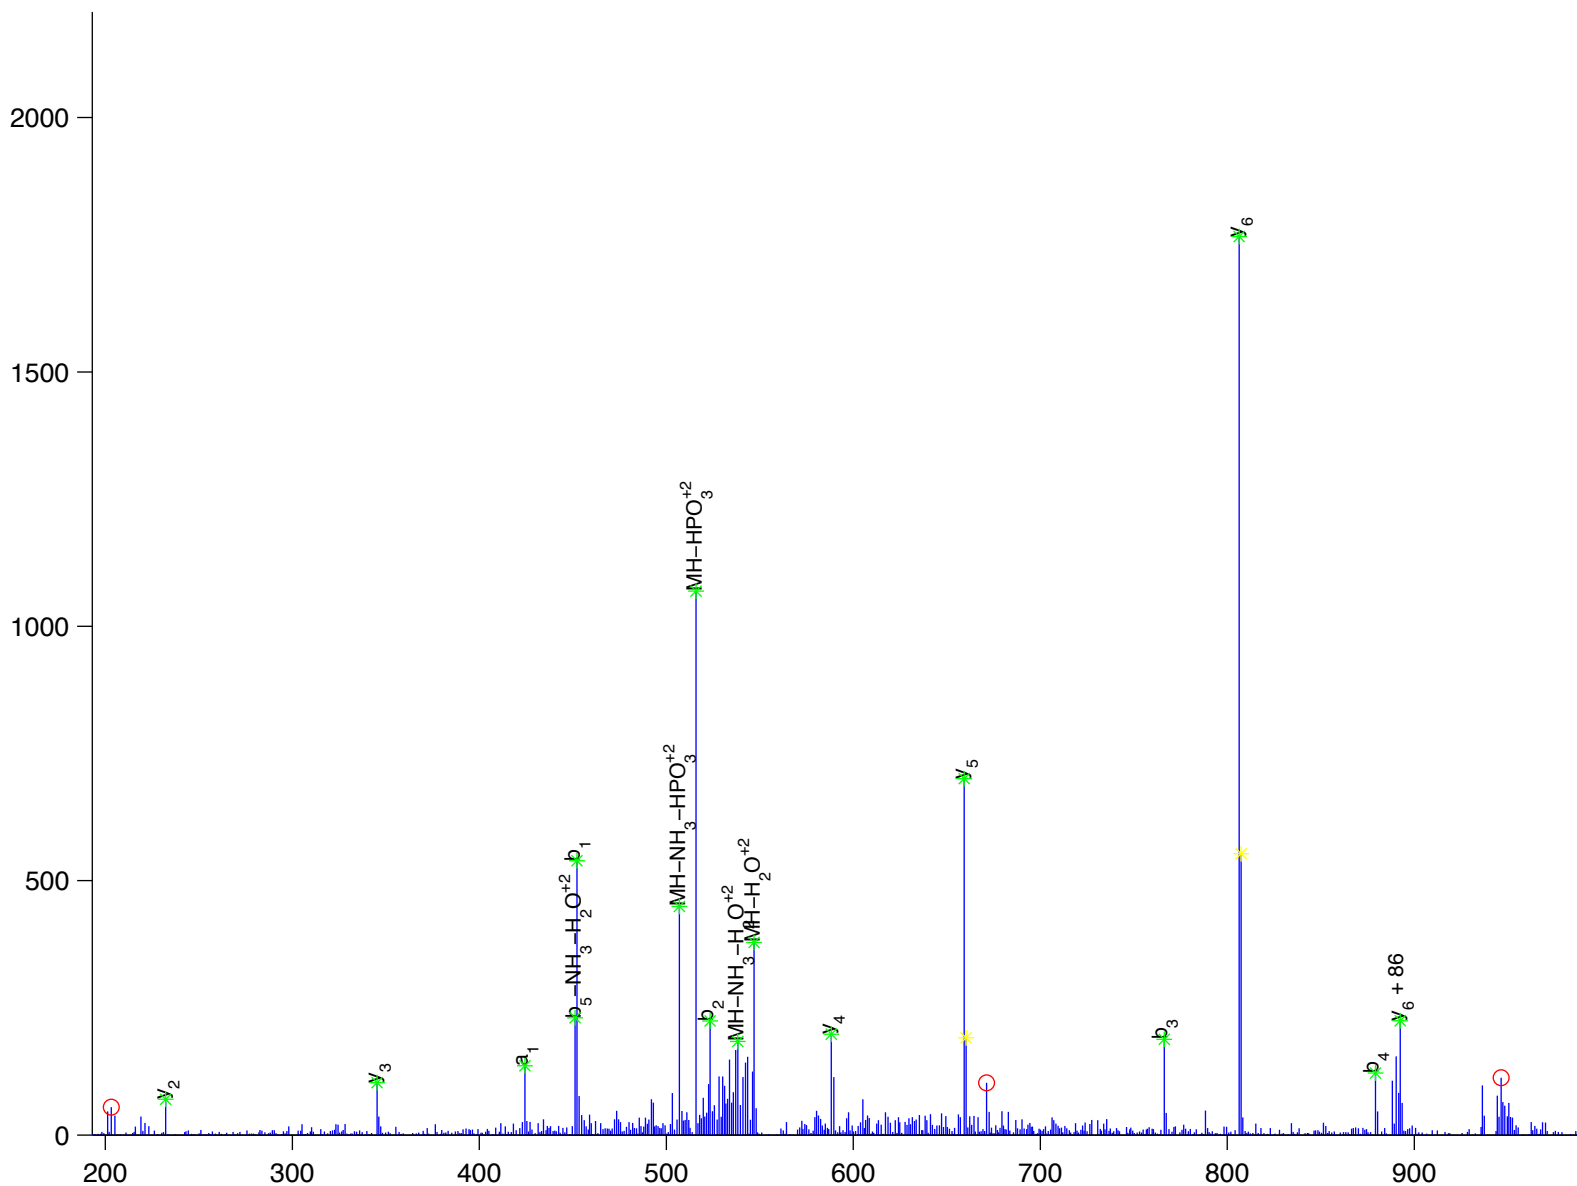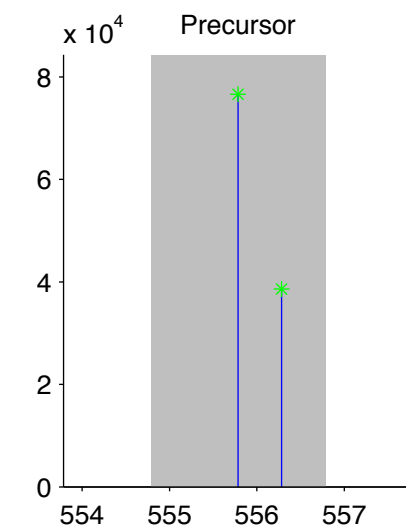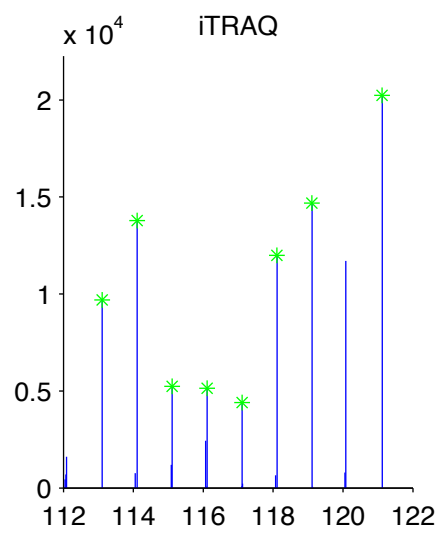

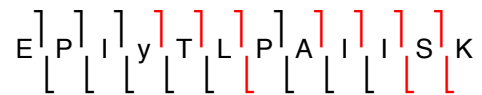

RIKEN cDNA 9030420J04 gene

Charge State: +3

Scan Number: 8846

File Name: 090806ptp1blivers\_M\_NC2.raw

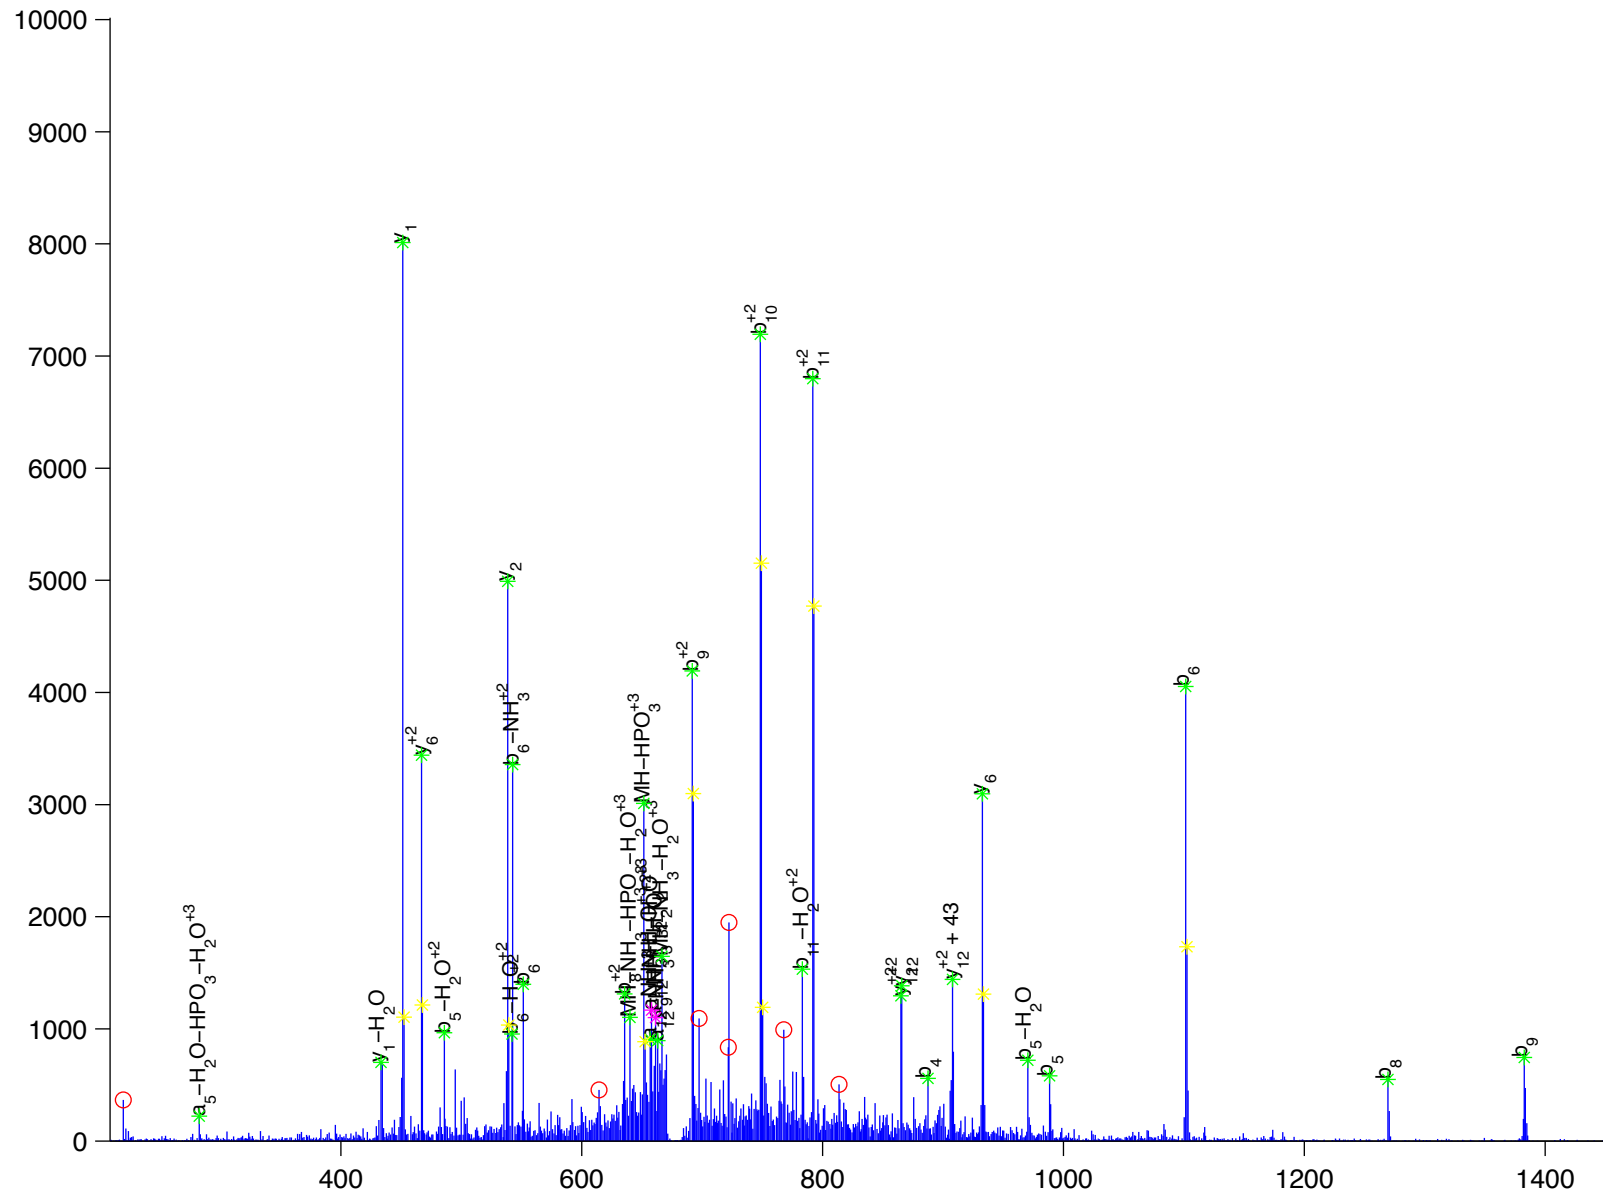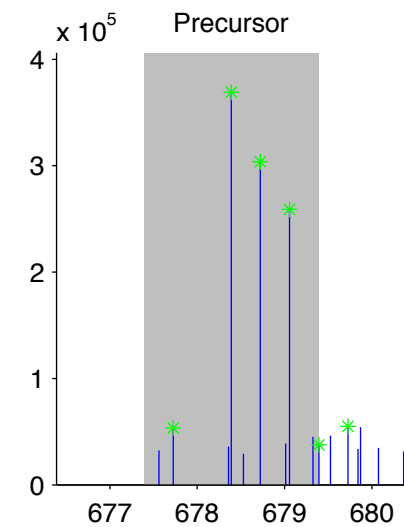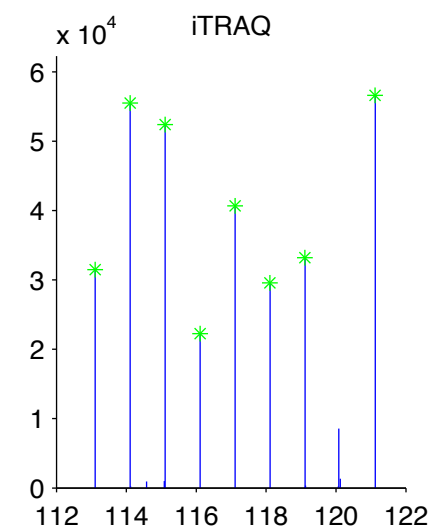

L [ W ] L [ E ] A [ M ] D [ G ] K [ E ] P [ I ] y [ T ] L [ P ] A [ I ] I [ S ] K

RIKEN cDNA 9030420J04 gene

Charge State: +4

Scan Number: 9674

File Name: 090806ptp1blivers\_M\_NC2.raw

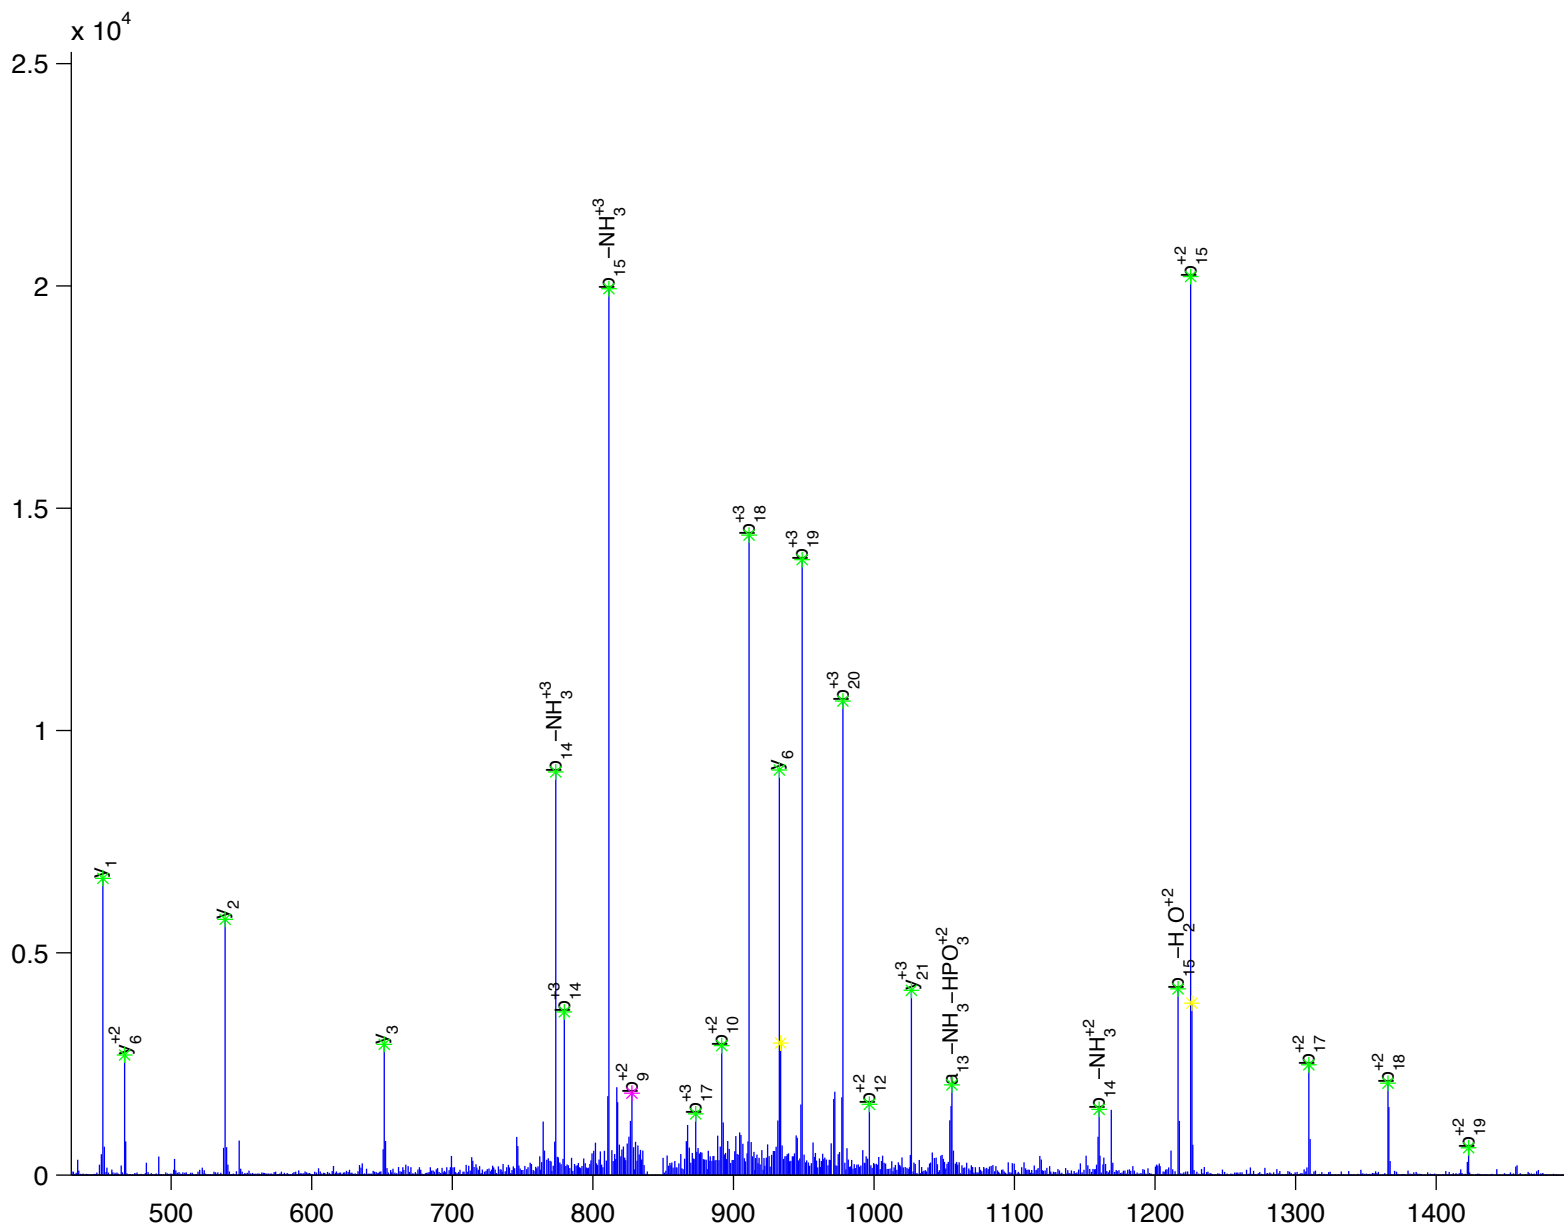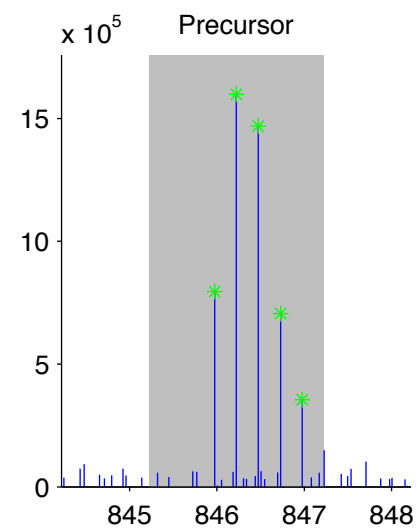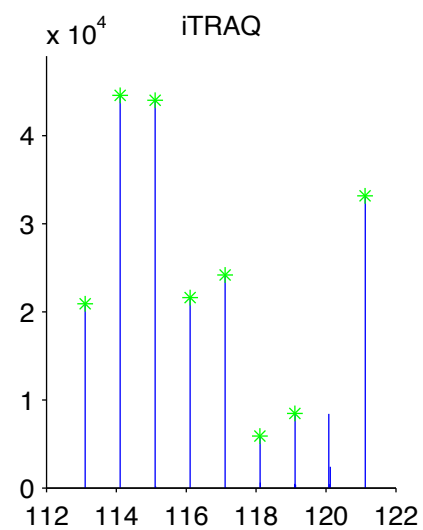

F [ D ] N [ L ] y [ G ] C [ R ]

S-adenosylhomocysteine hydrolase

Charge State: +2

Scan Number: 3991

File Name: 090728ptp1blivers\_M\_NC\_ins\_e.raw

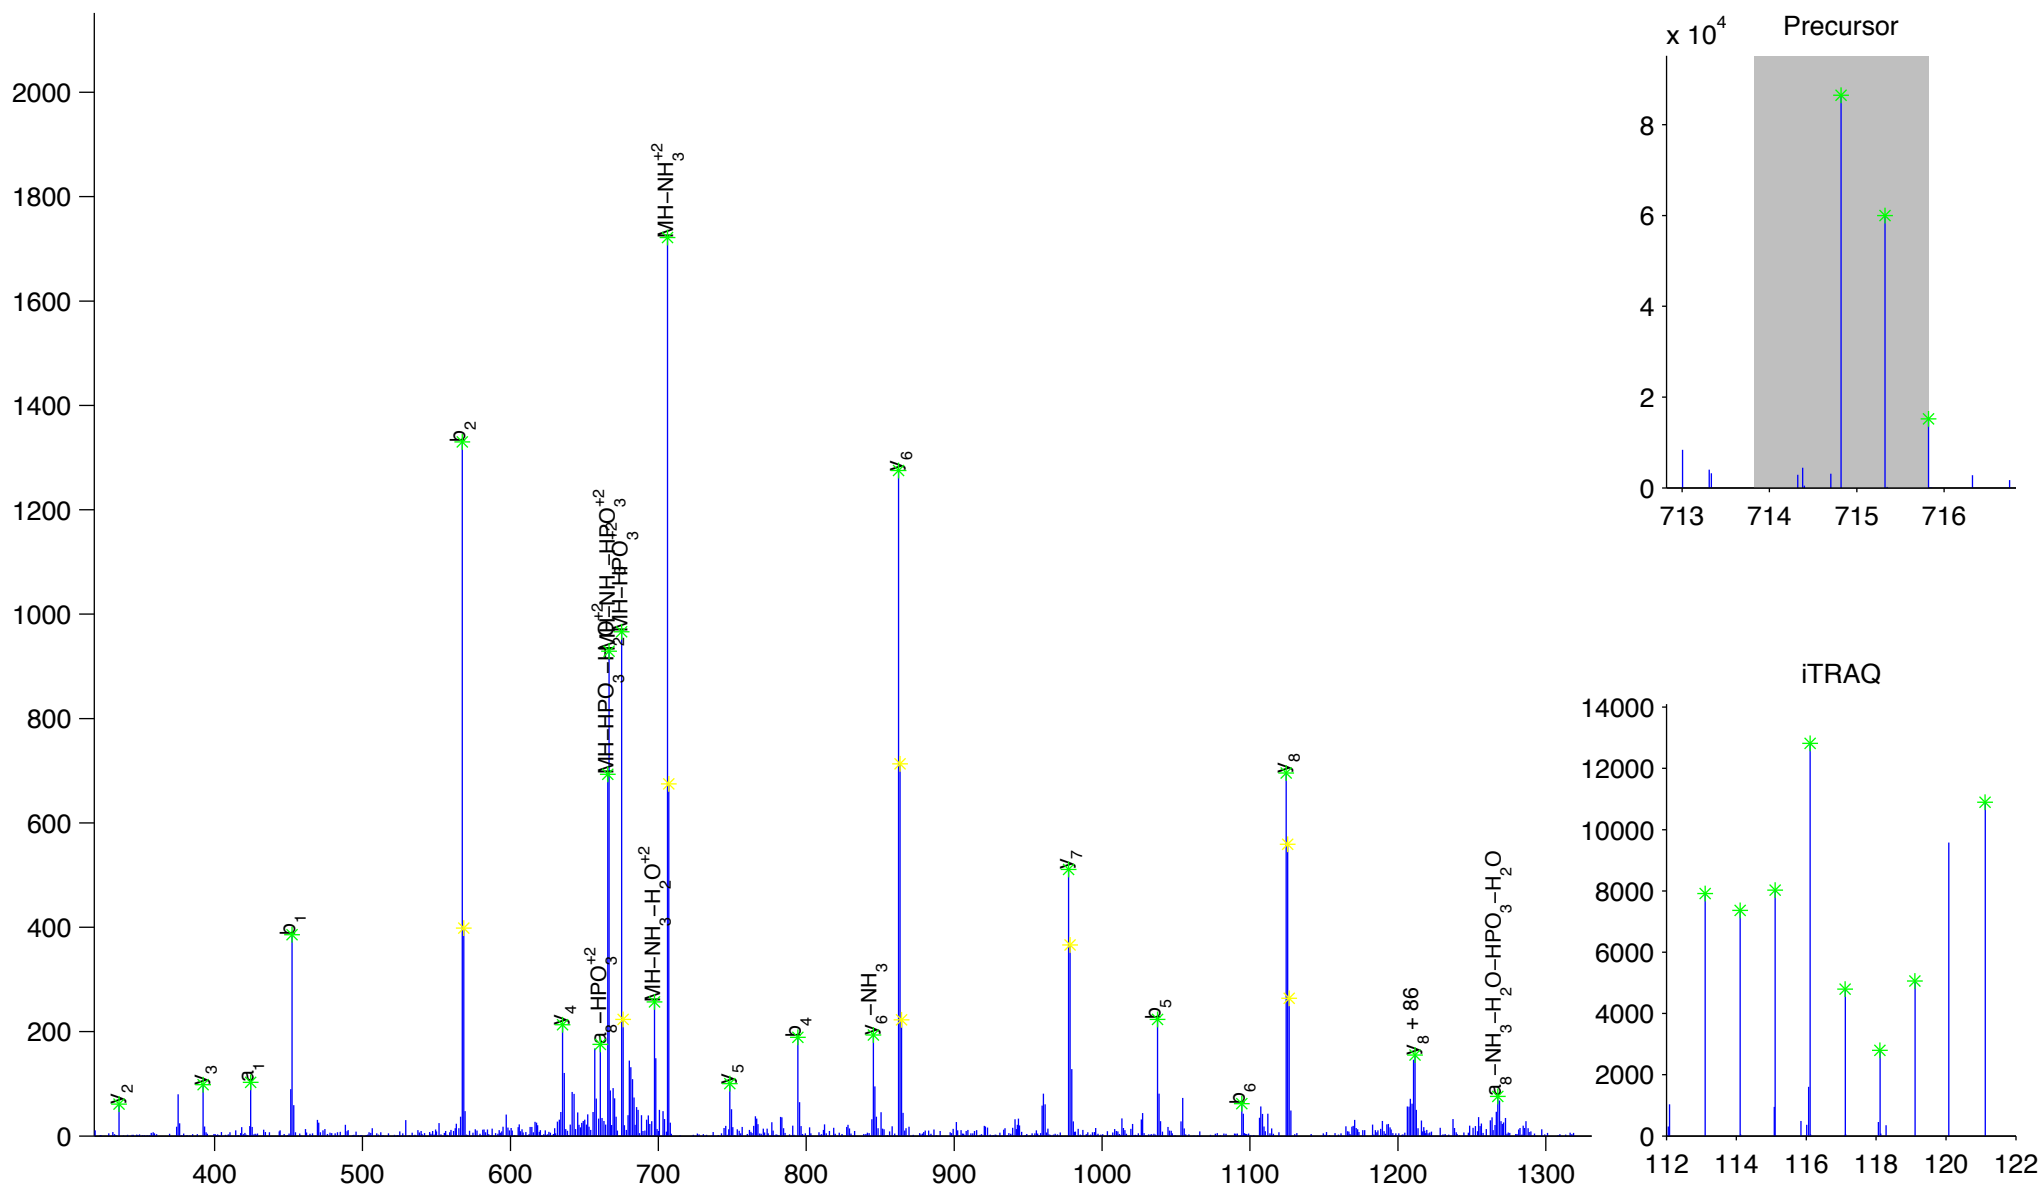

S [ K ] F [ D ] N [ L ] y [ G ] C [ R ]

S-adenosylhomocysteine hydrolase

Charge State: +3

Scan Number: 4477

File Name: 091130ptp1blivers\_hfd\_basal2.raw

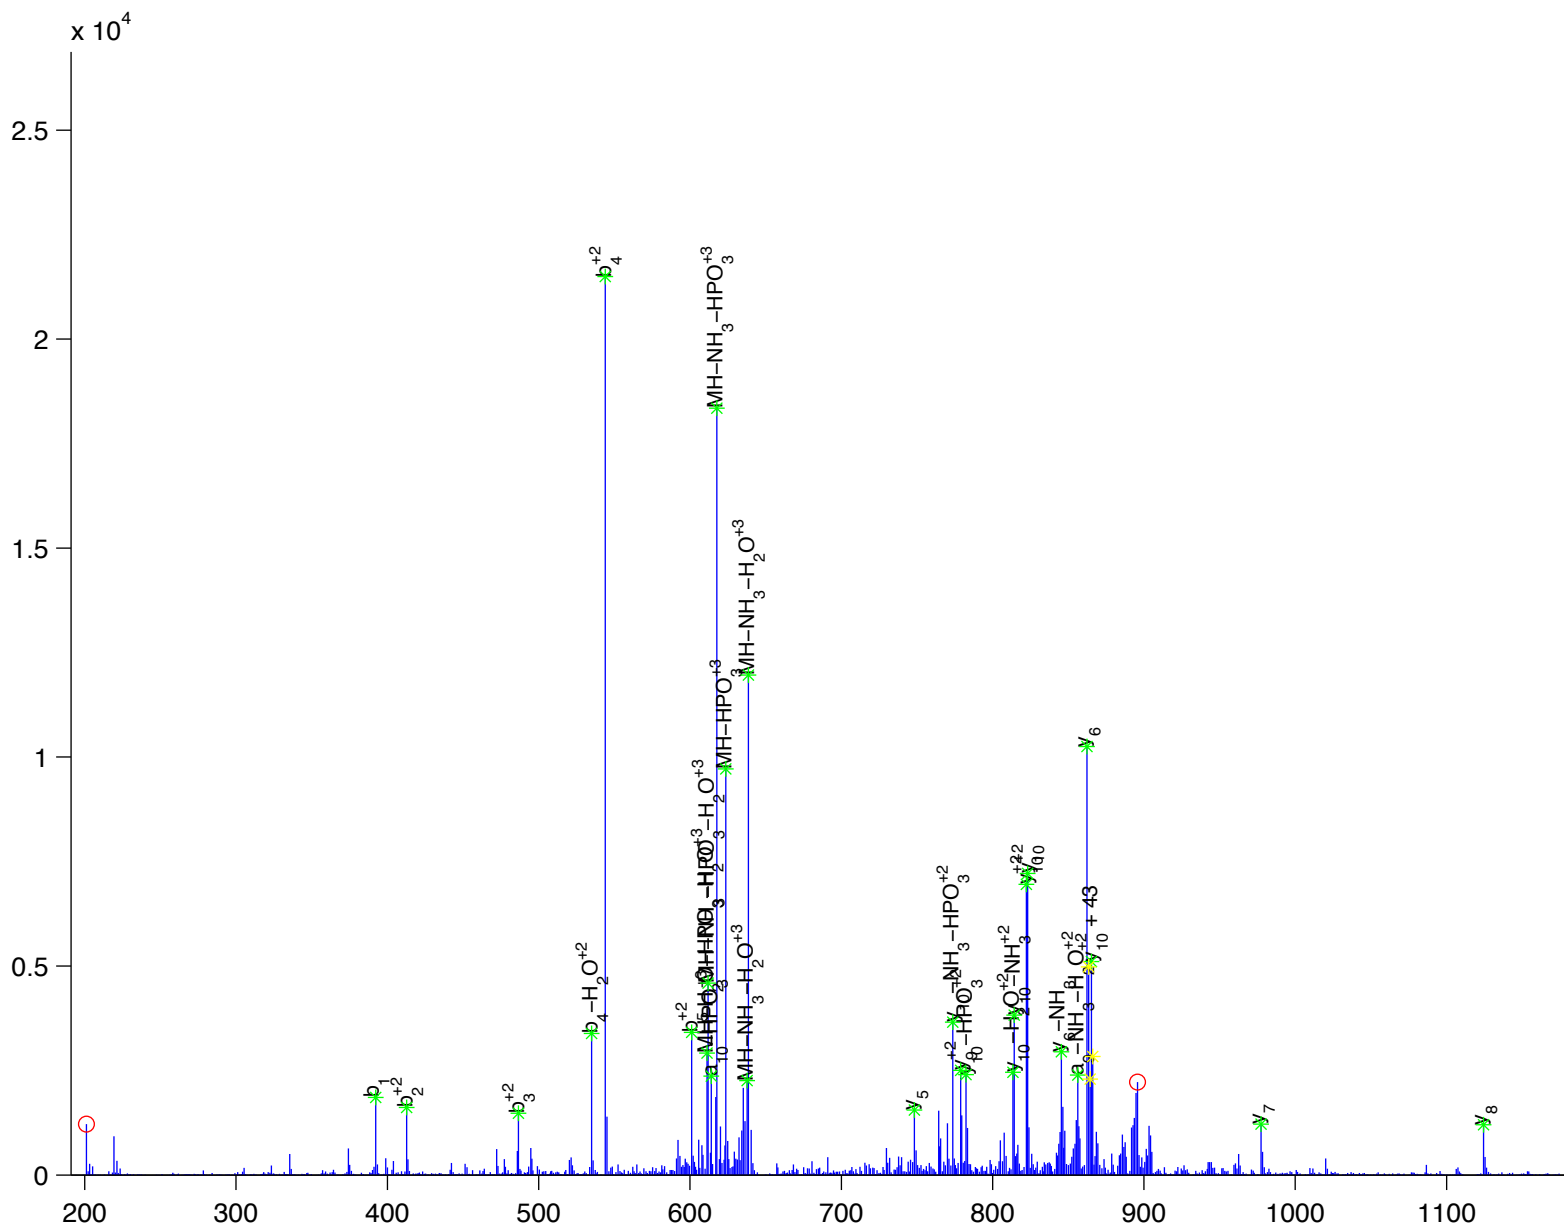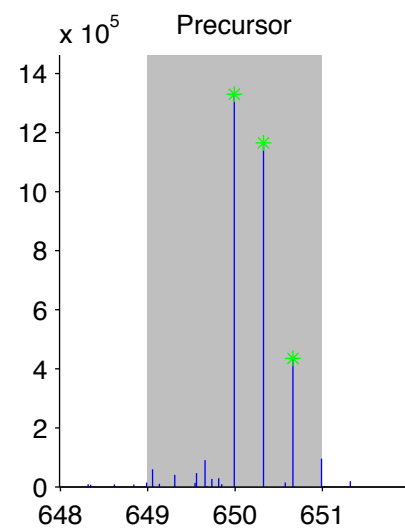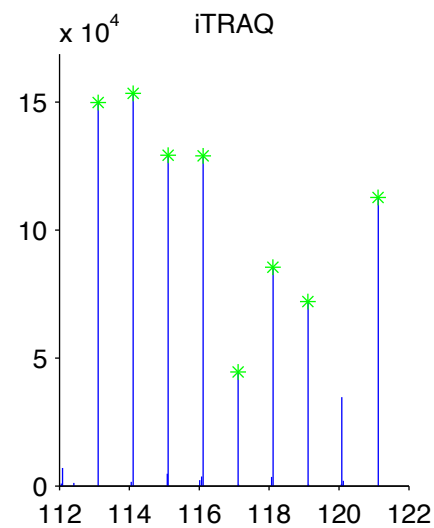



A [D] [D] y [F] [L] [L] R

SEC14 (*S. cerevisiae*)-like 2

Charge State: +2

Scan Number: 7207

File Name: 091130ptp1blivers\_hfd\_basal2.raw

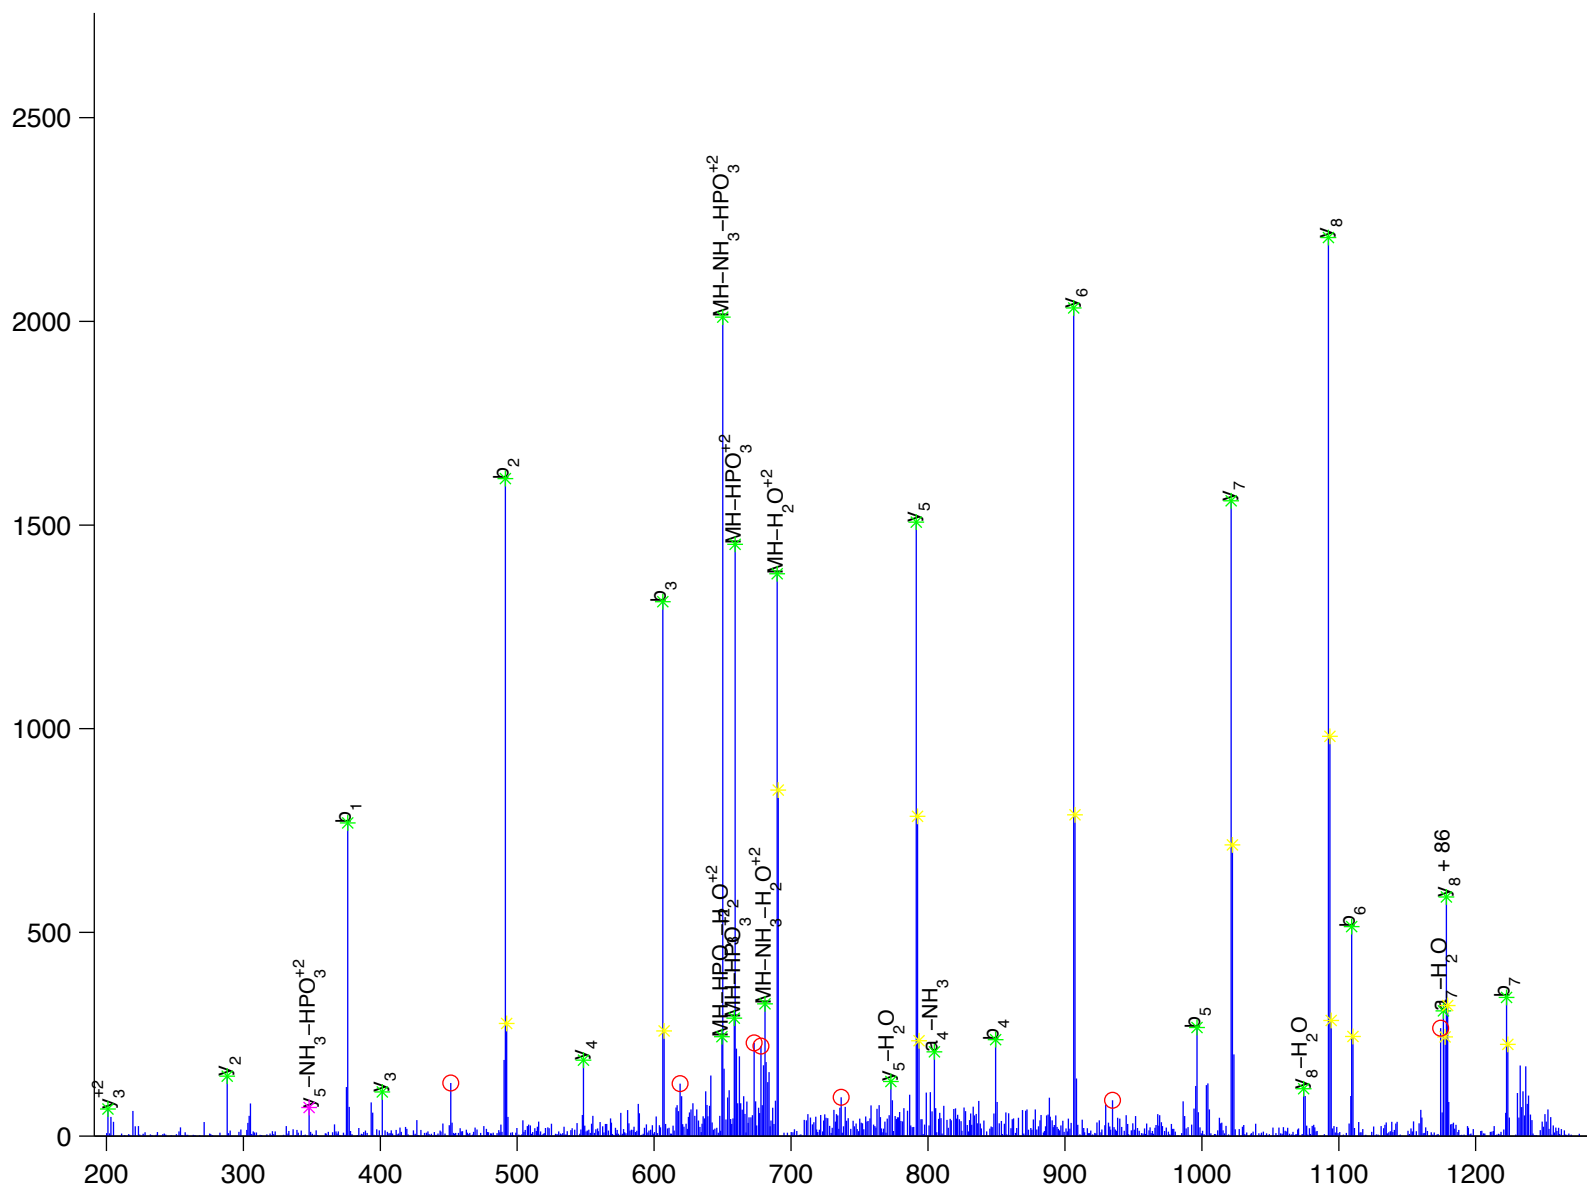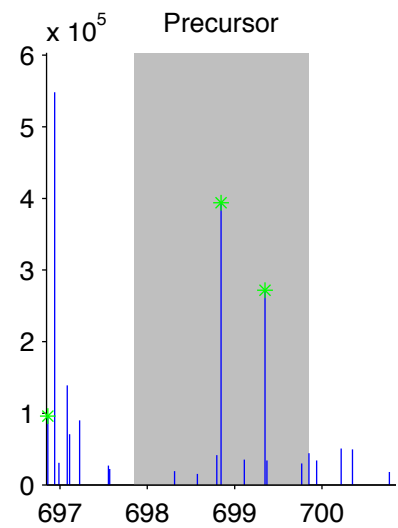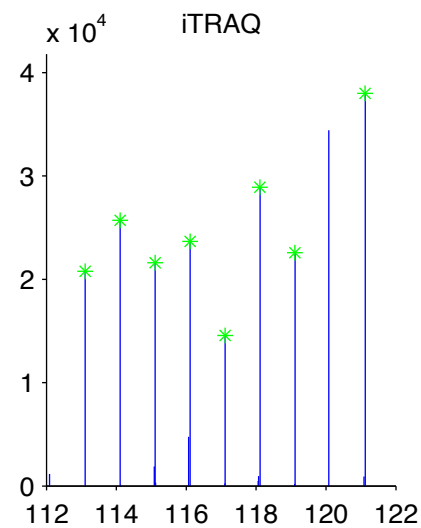



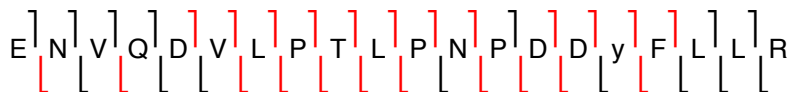

SEC14-like 2

Charge State: +3

Scan Number: 7668

File Name: 090728ptp1blivers\_M\_NC\_ins\_e.raw

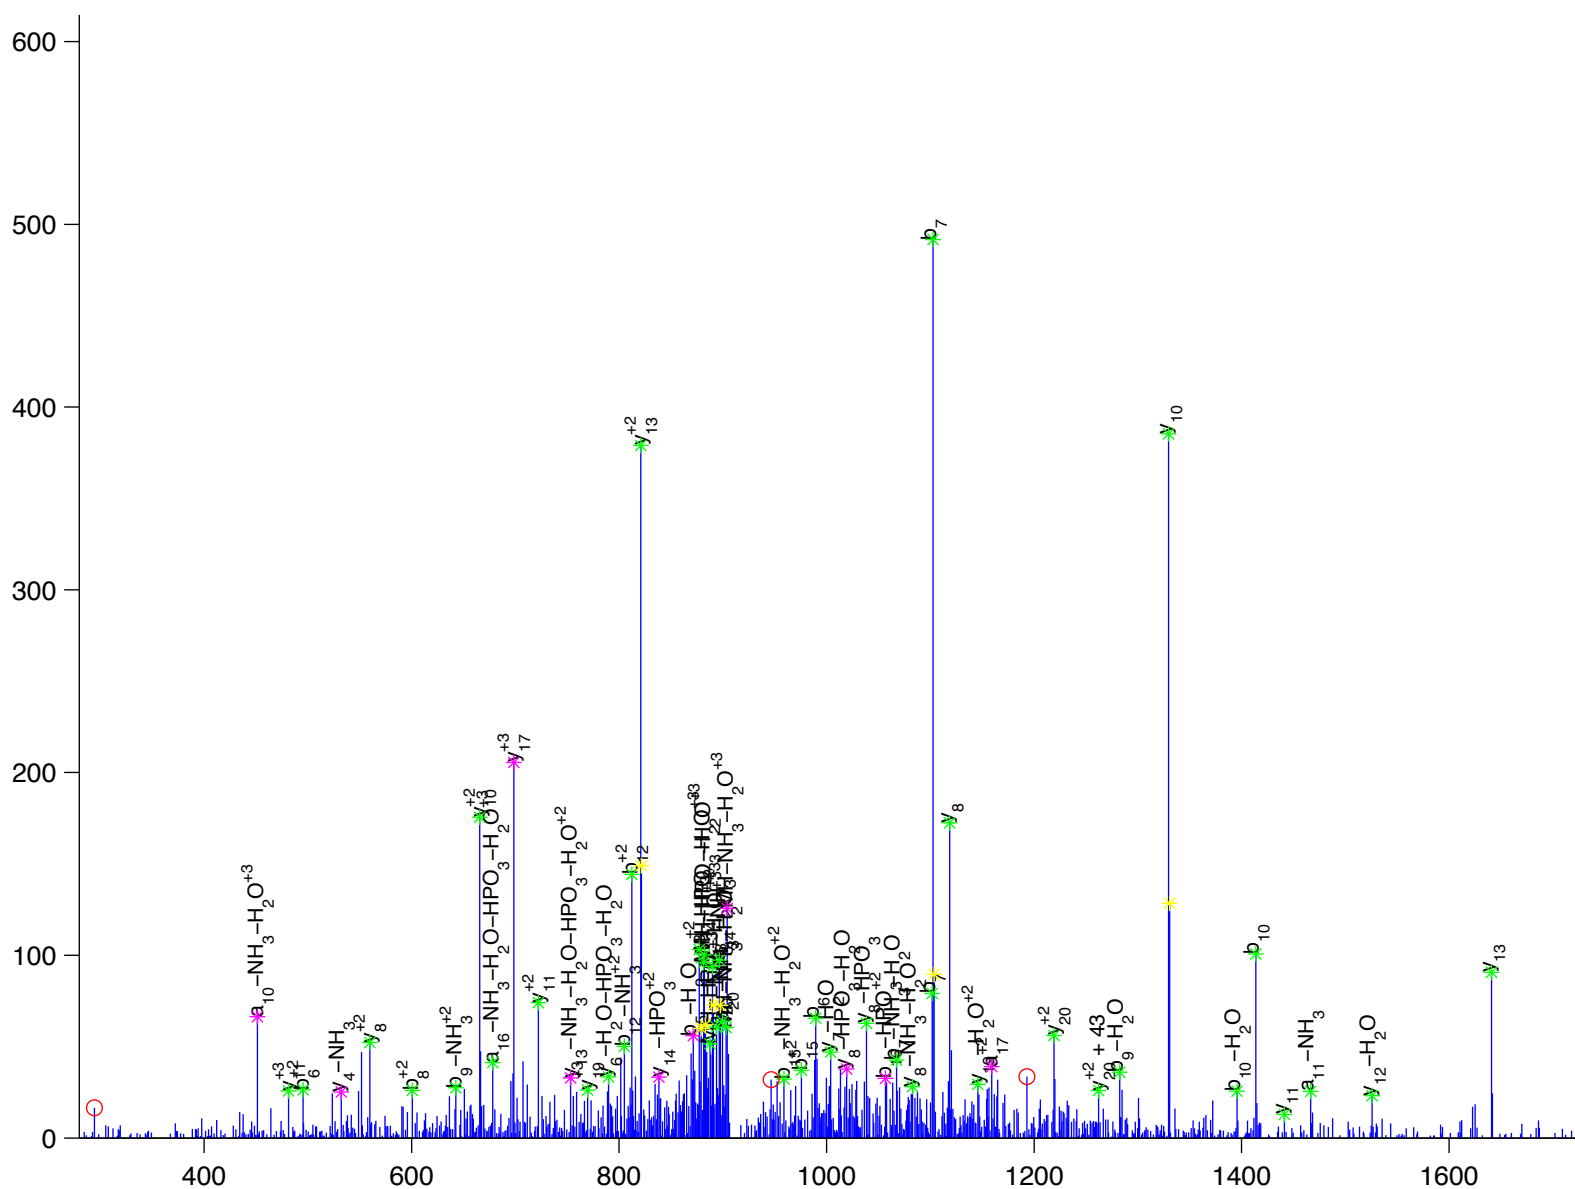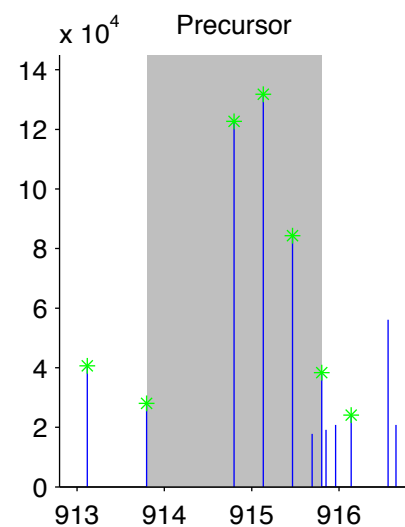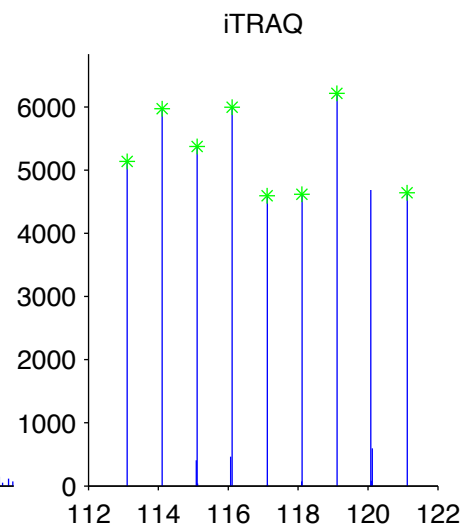

F R E N V Q D V L P T L P N P D D y F L L R

SEC14-like 2

Charge State: +4

Scan Number: 9512

File Name: 090806ptp1blivers\_M\_NC2.raw

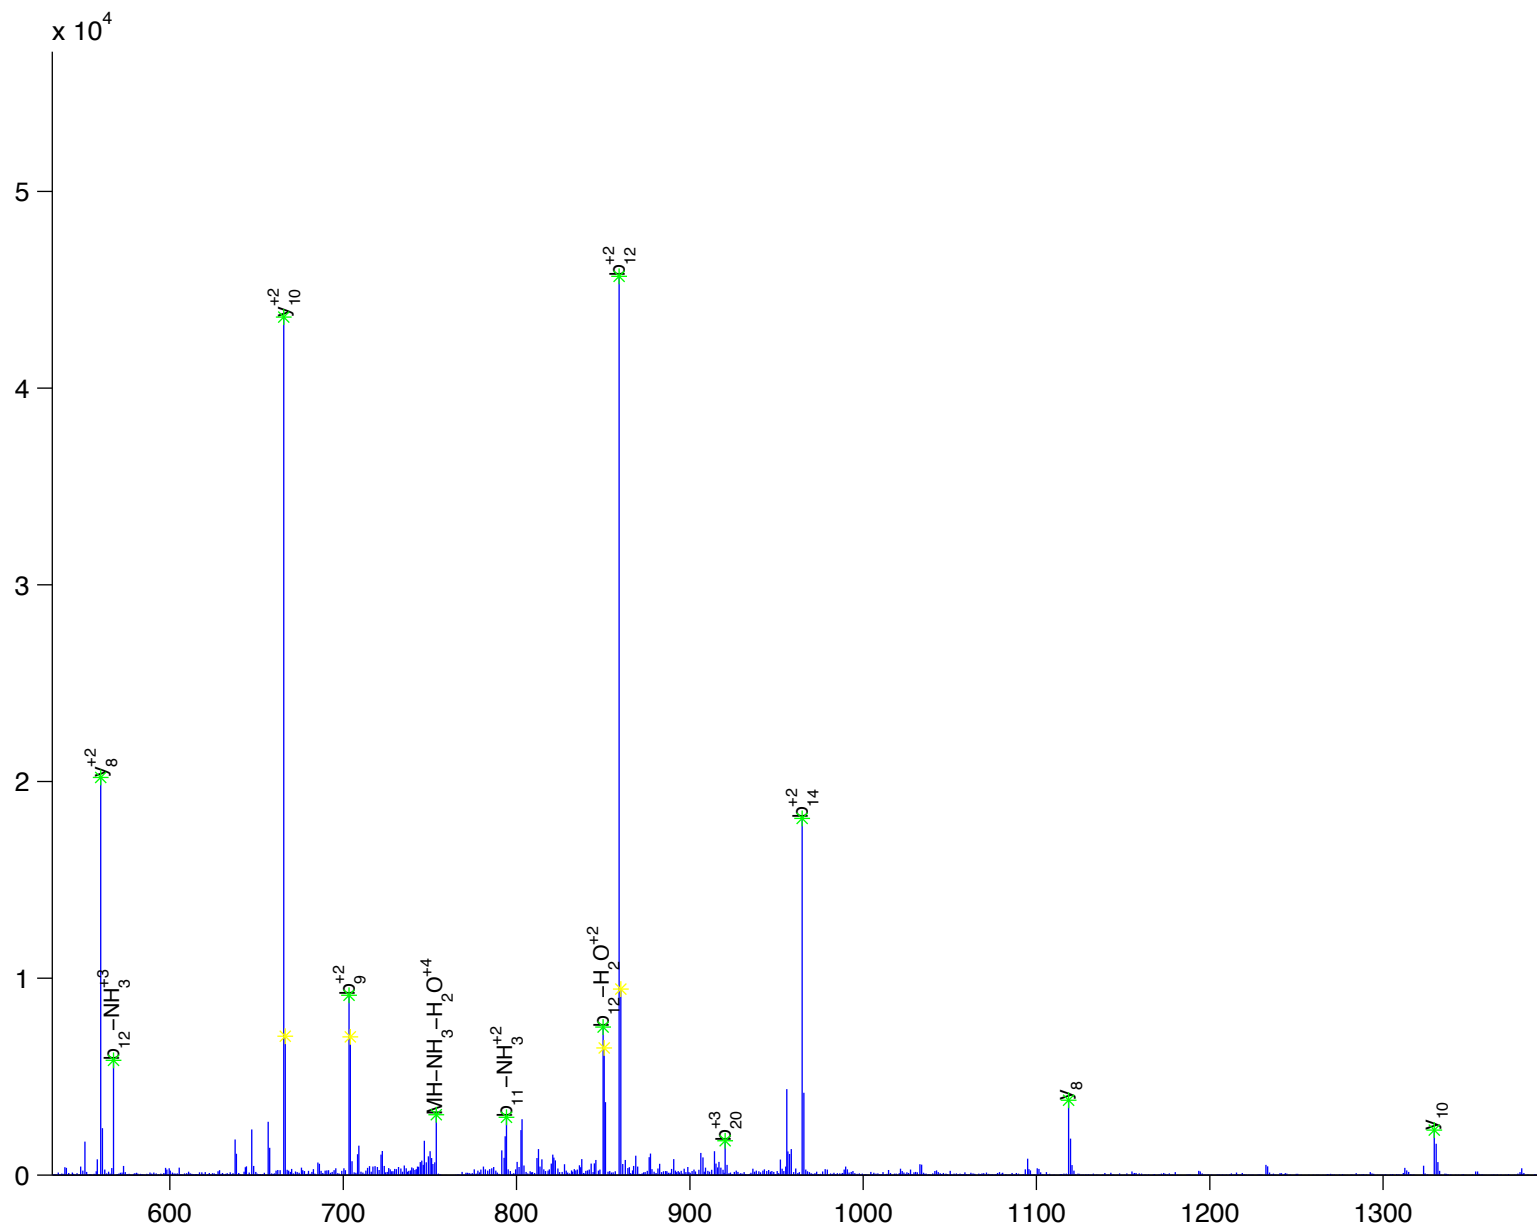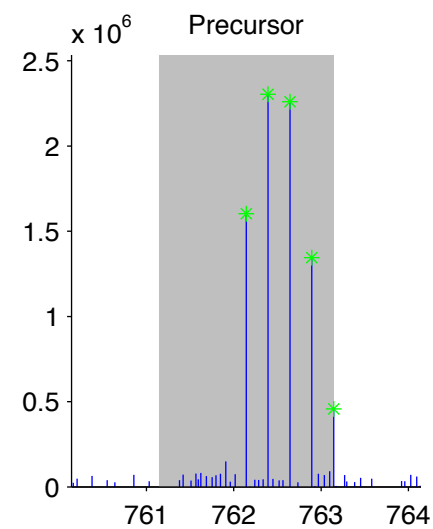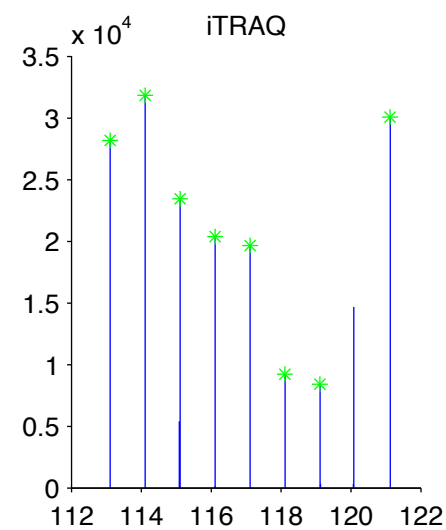

Q [ Q ] P [ T ] Q [ F ] I [ N ] P [ E ] T [ P ] G [ y ] V [ G ] F [ A ] N [ L ] P [ N ] Q [ V ] H [ R ]

septin 2

Charge State: +4

Scan Number: 6997

File Name: 091130ptp1blivers\_hfd\_basal2.raw

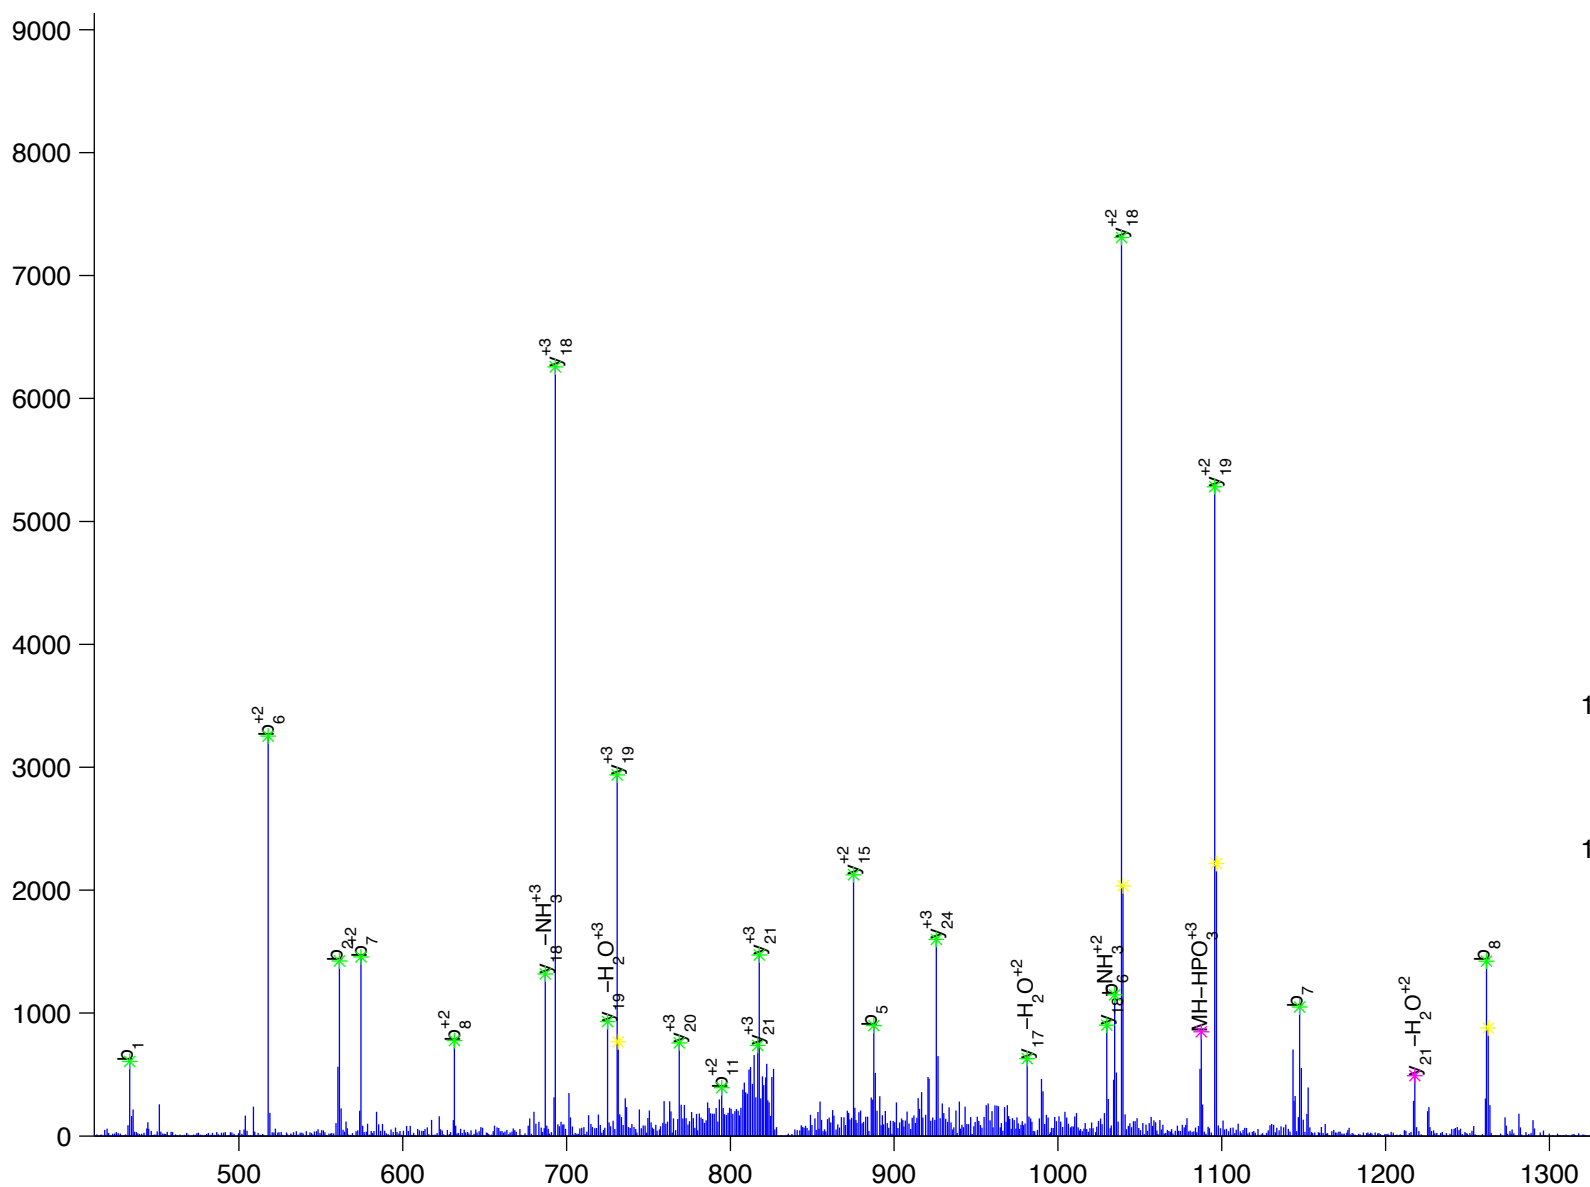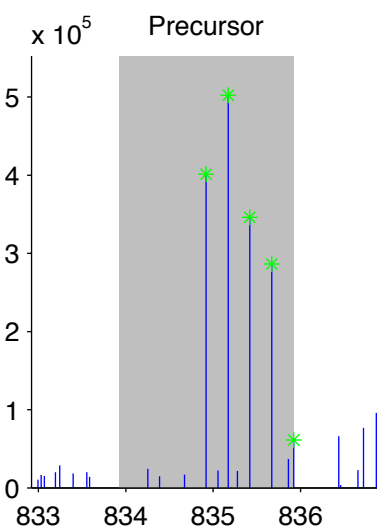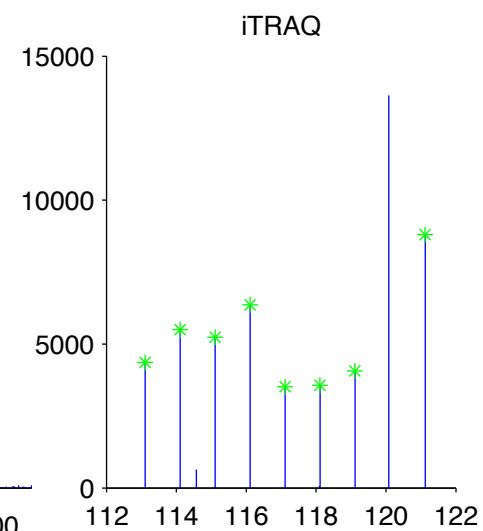

y [ S ] [ E ] [ G ] [ Y ] [ P ] [ G ] [ Q ] [ R ]

serine hydroxymethyltransferase 1 (soluble)

Charge State: +2

Scan Number: 4213

File Name: 090807ptp1blivers\_M\_HFD\_basal.raw

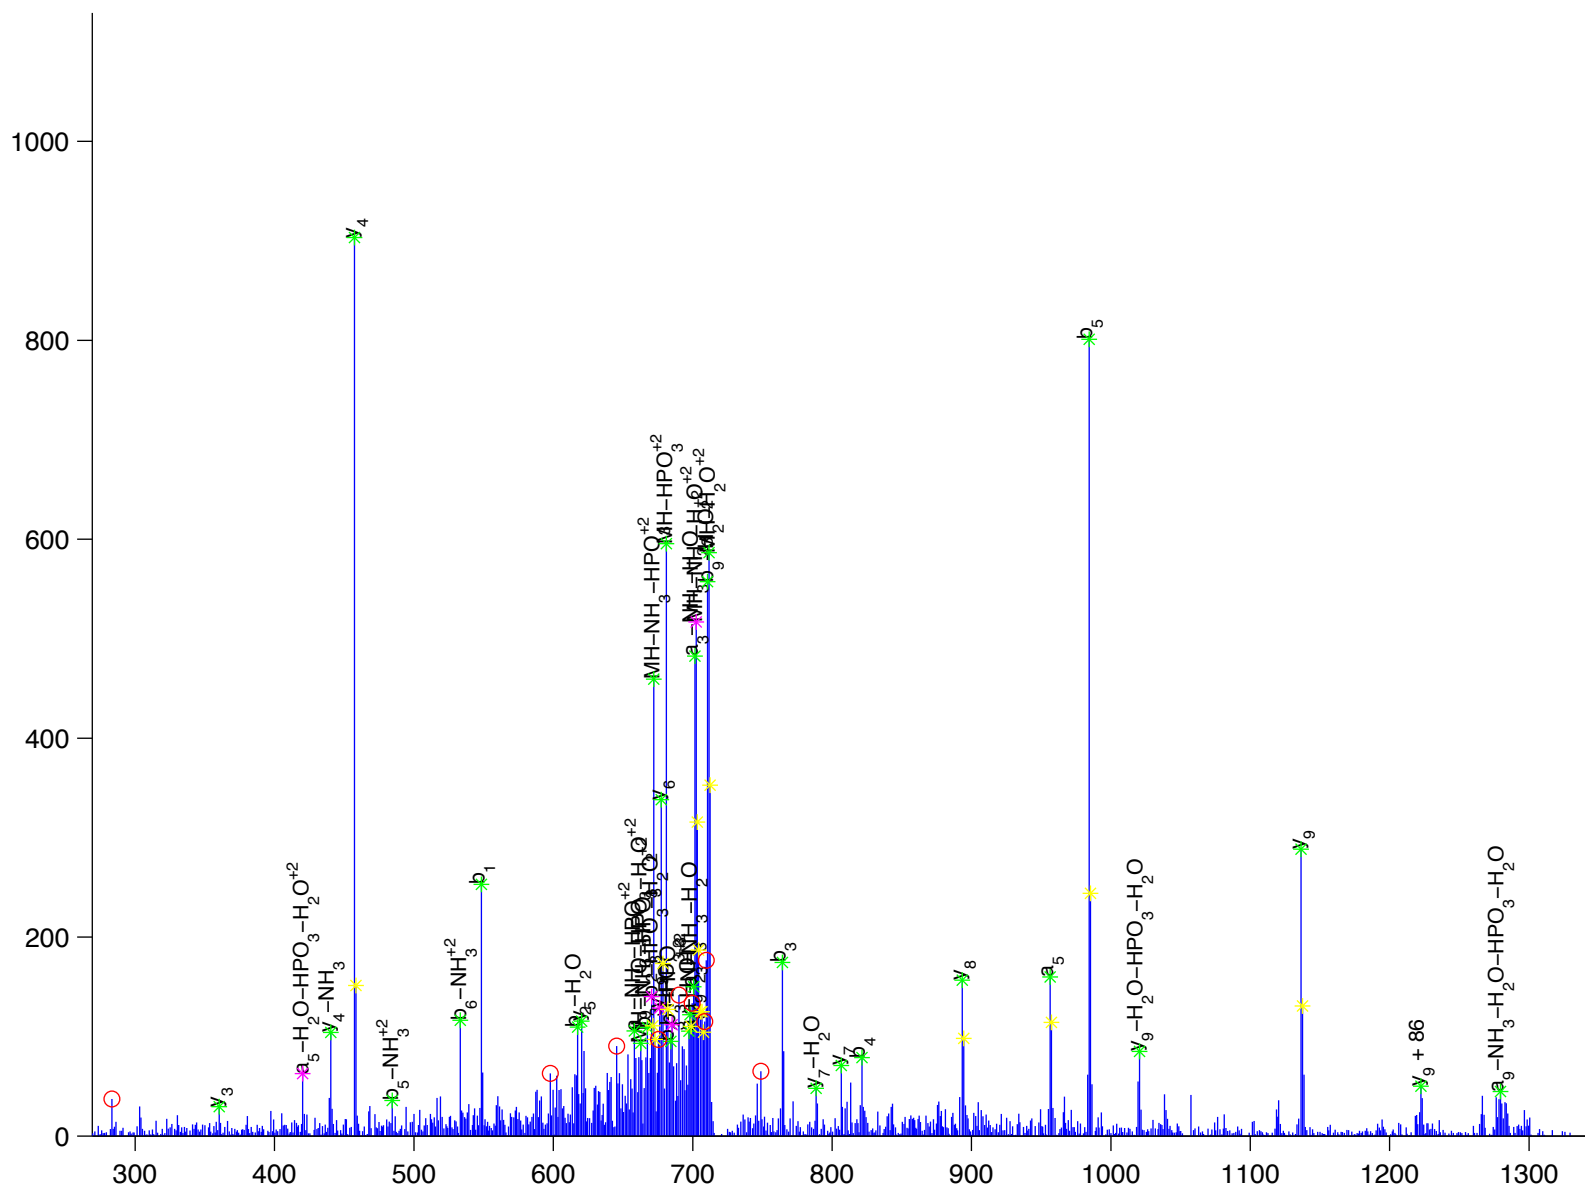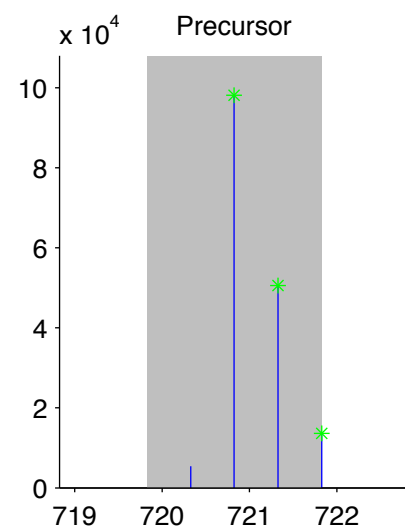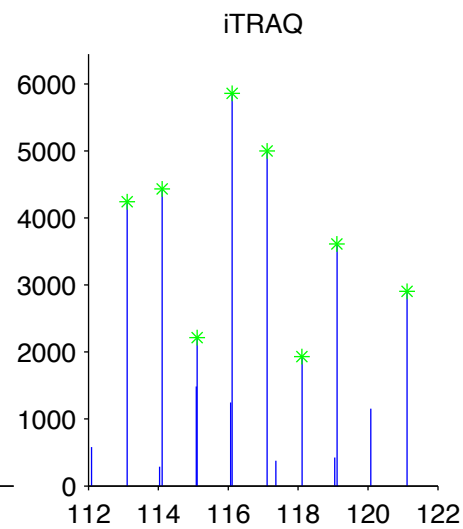

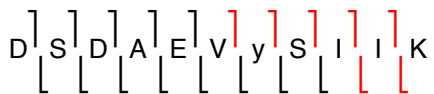

serine hydroxymethyltransferase 1 (soluble)

Charge State: +3

Scan Number: 6047

File Name: 091130ptp1blivers\_hfd\_basal2.raw

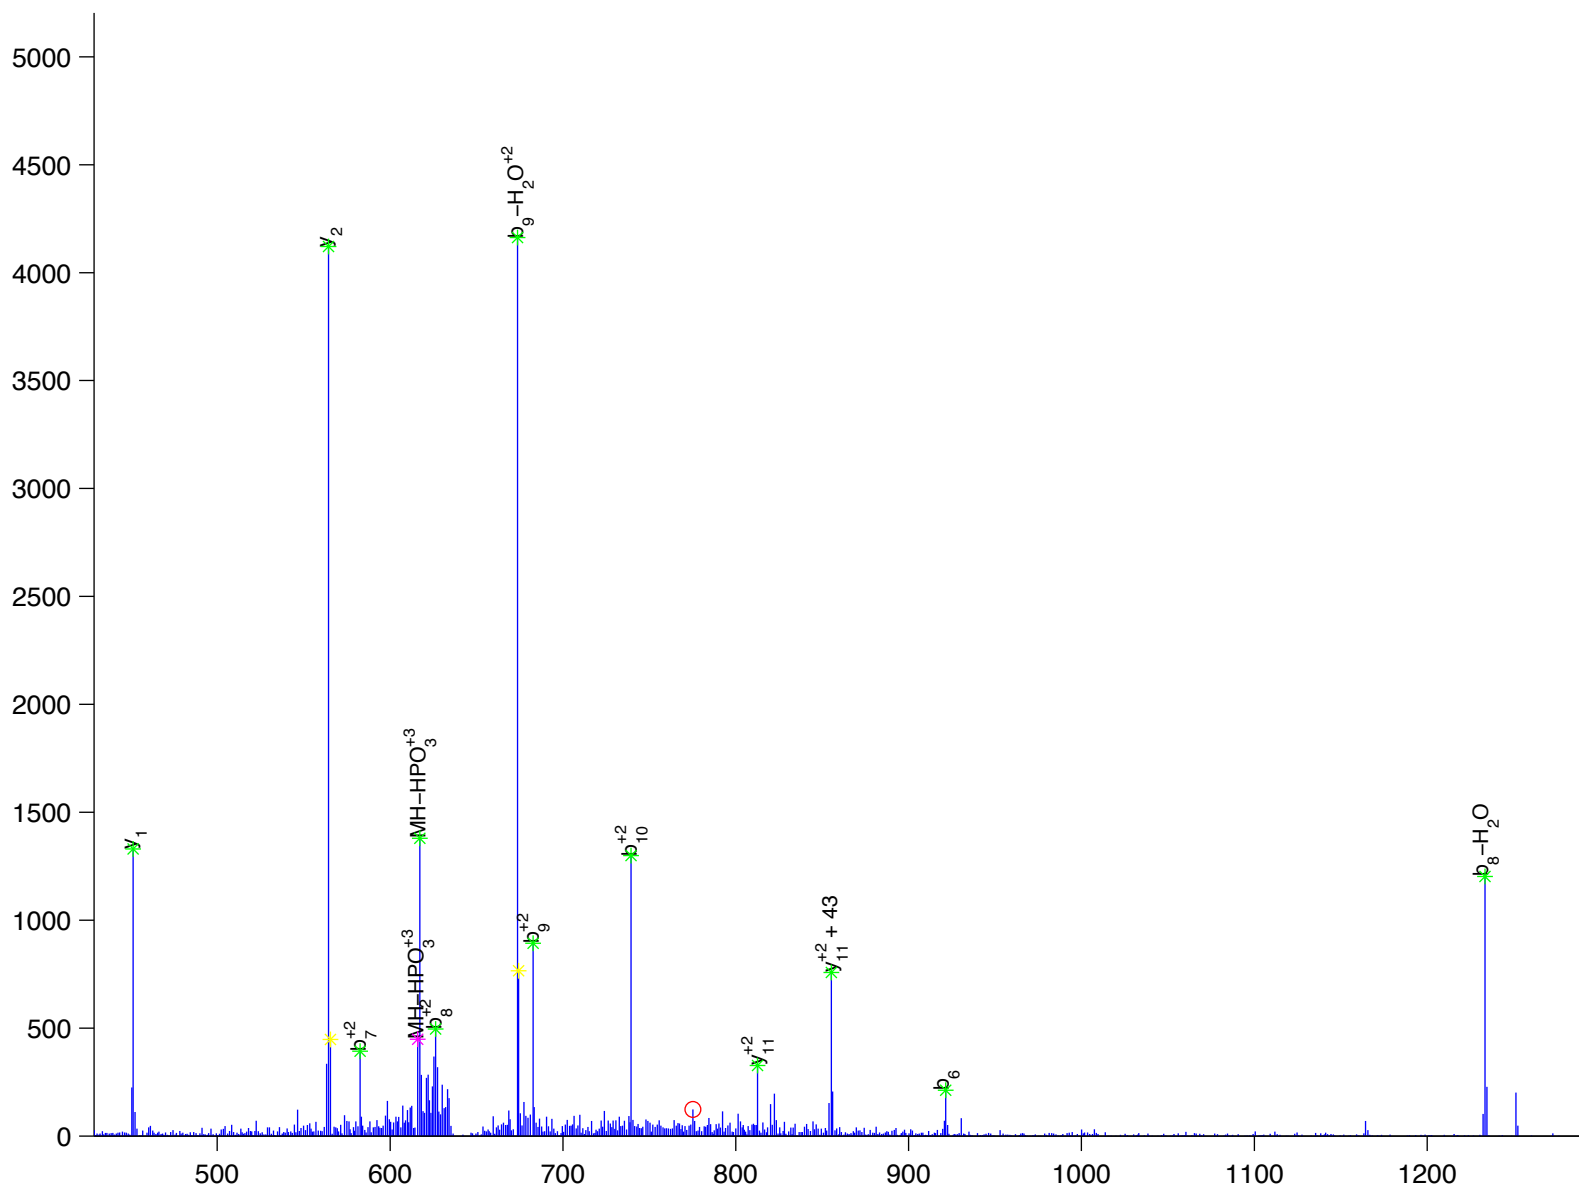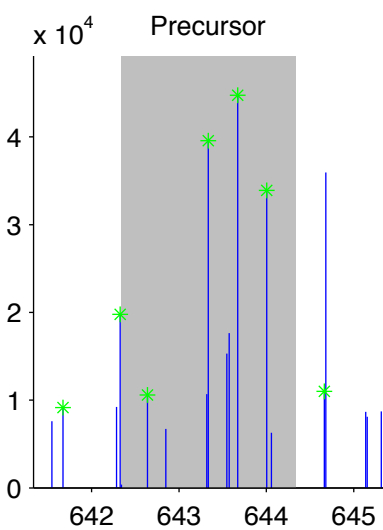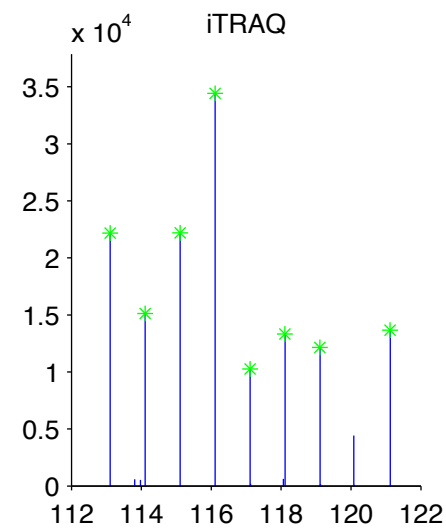

T [ A ] [ A ] [ E ] [ L ] [ E ] [ A ] [ A ] [ G ] [ D ] y [ V ] K

SH2 domain containing 3C

Charge State: +3

Scan Number: 4442

File Name: 100905ptp1blivers\_ncHFD\_basal.raw

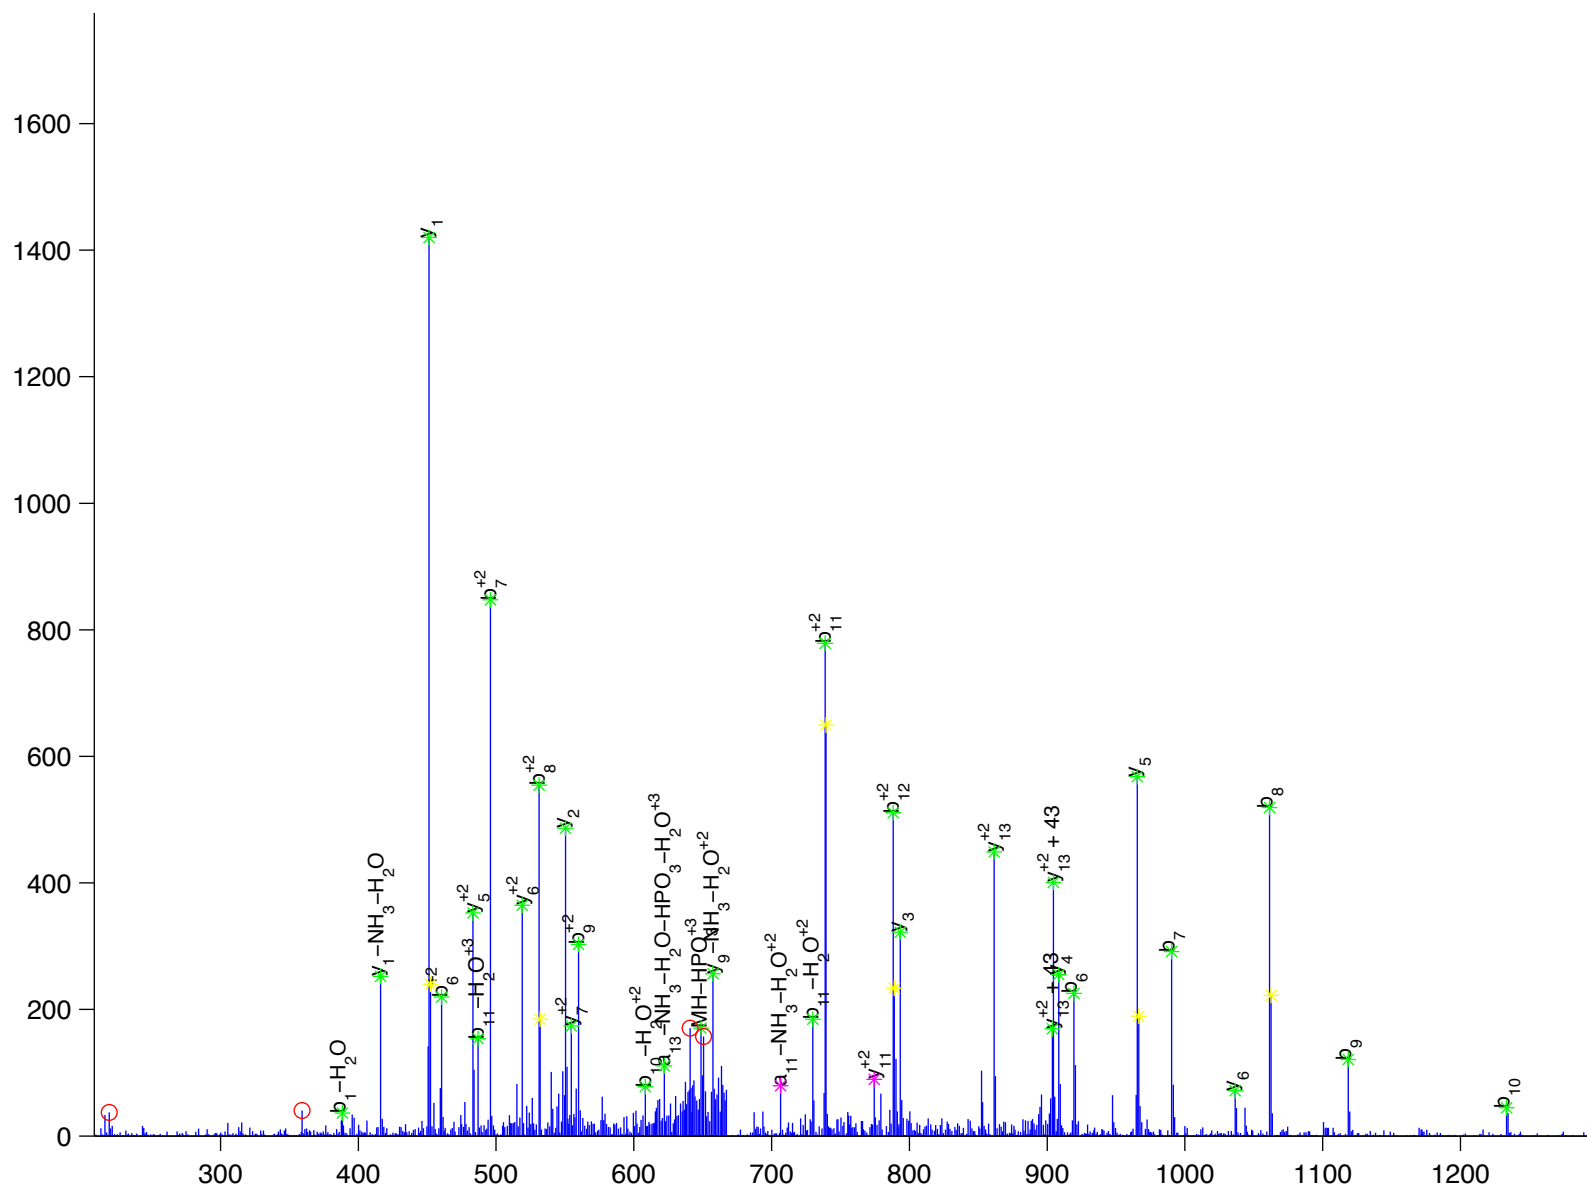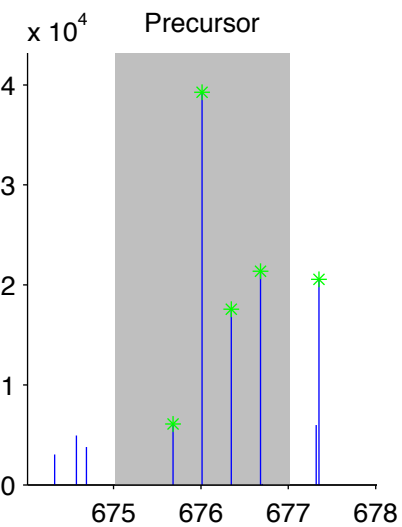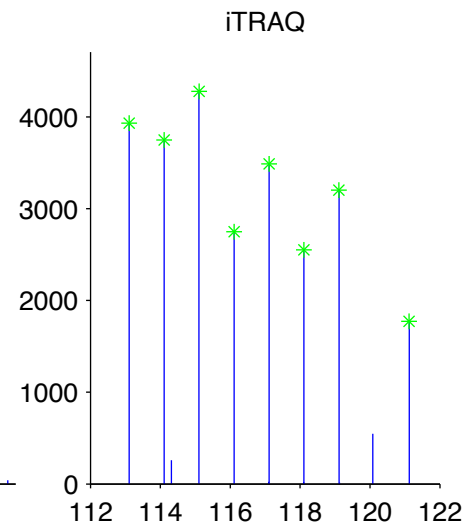

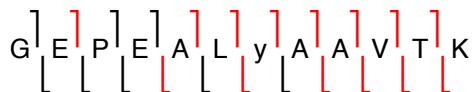

SH3 domain protein 1B

Charge State: +3

Scan Number: 1013

File Name: HJ072909\_HFD\_E1\_2.raw

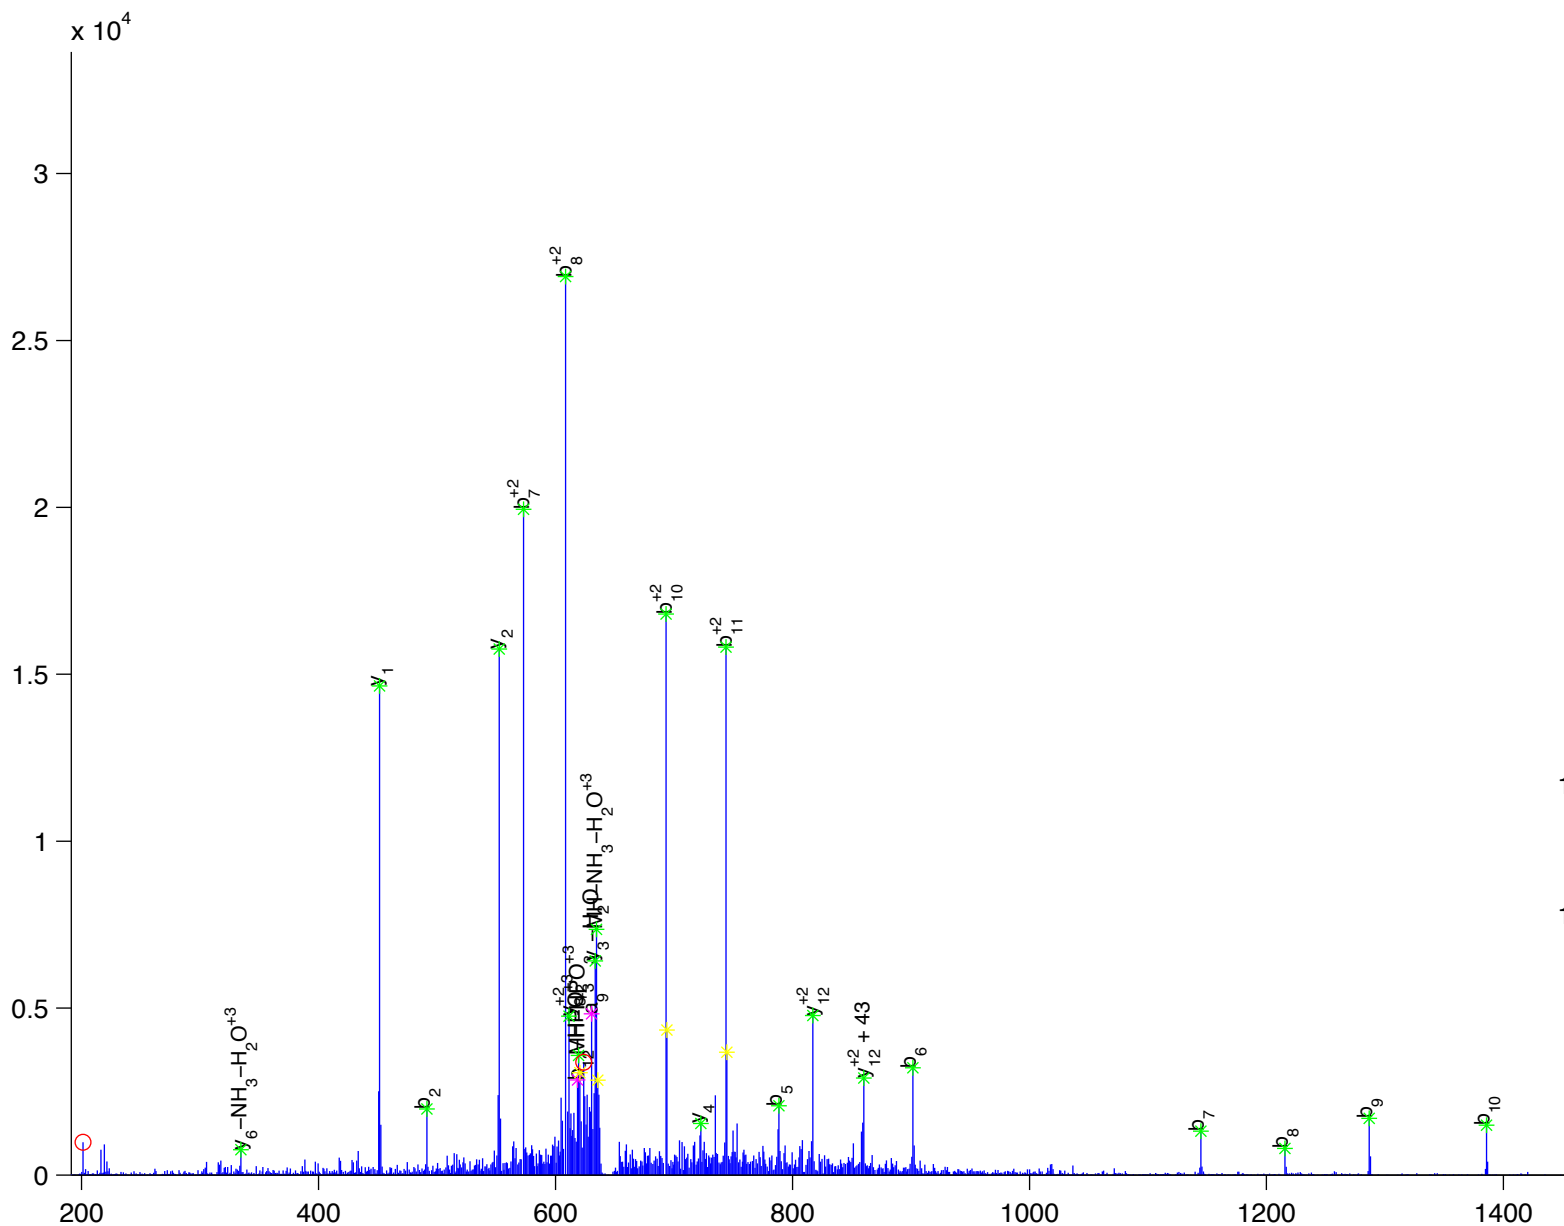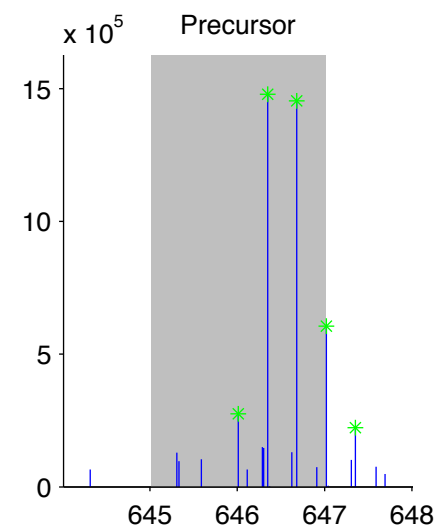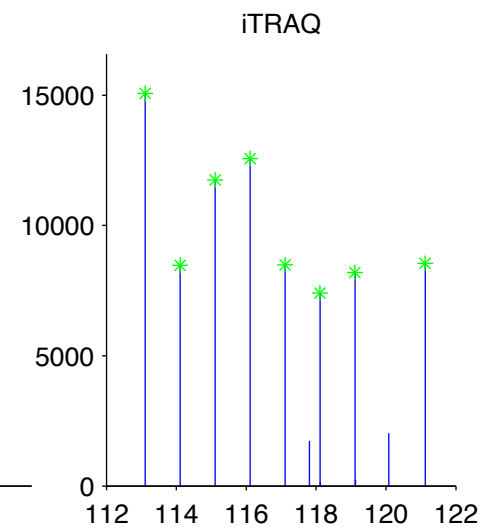

y [ C ] R [ P ] E [ S ] Q [ E ] H [ P ] E [ A ] D [ P ] G [ S ] A [ A ] P [ Y ] L [ K ]

signal transducer and activator of transcription 3 isoform 3

Charge State: +4

Scan Number: 4359

File Name: 091130ptp1blivers\_hfd\_basal2.raw

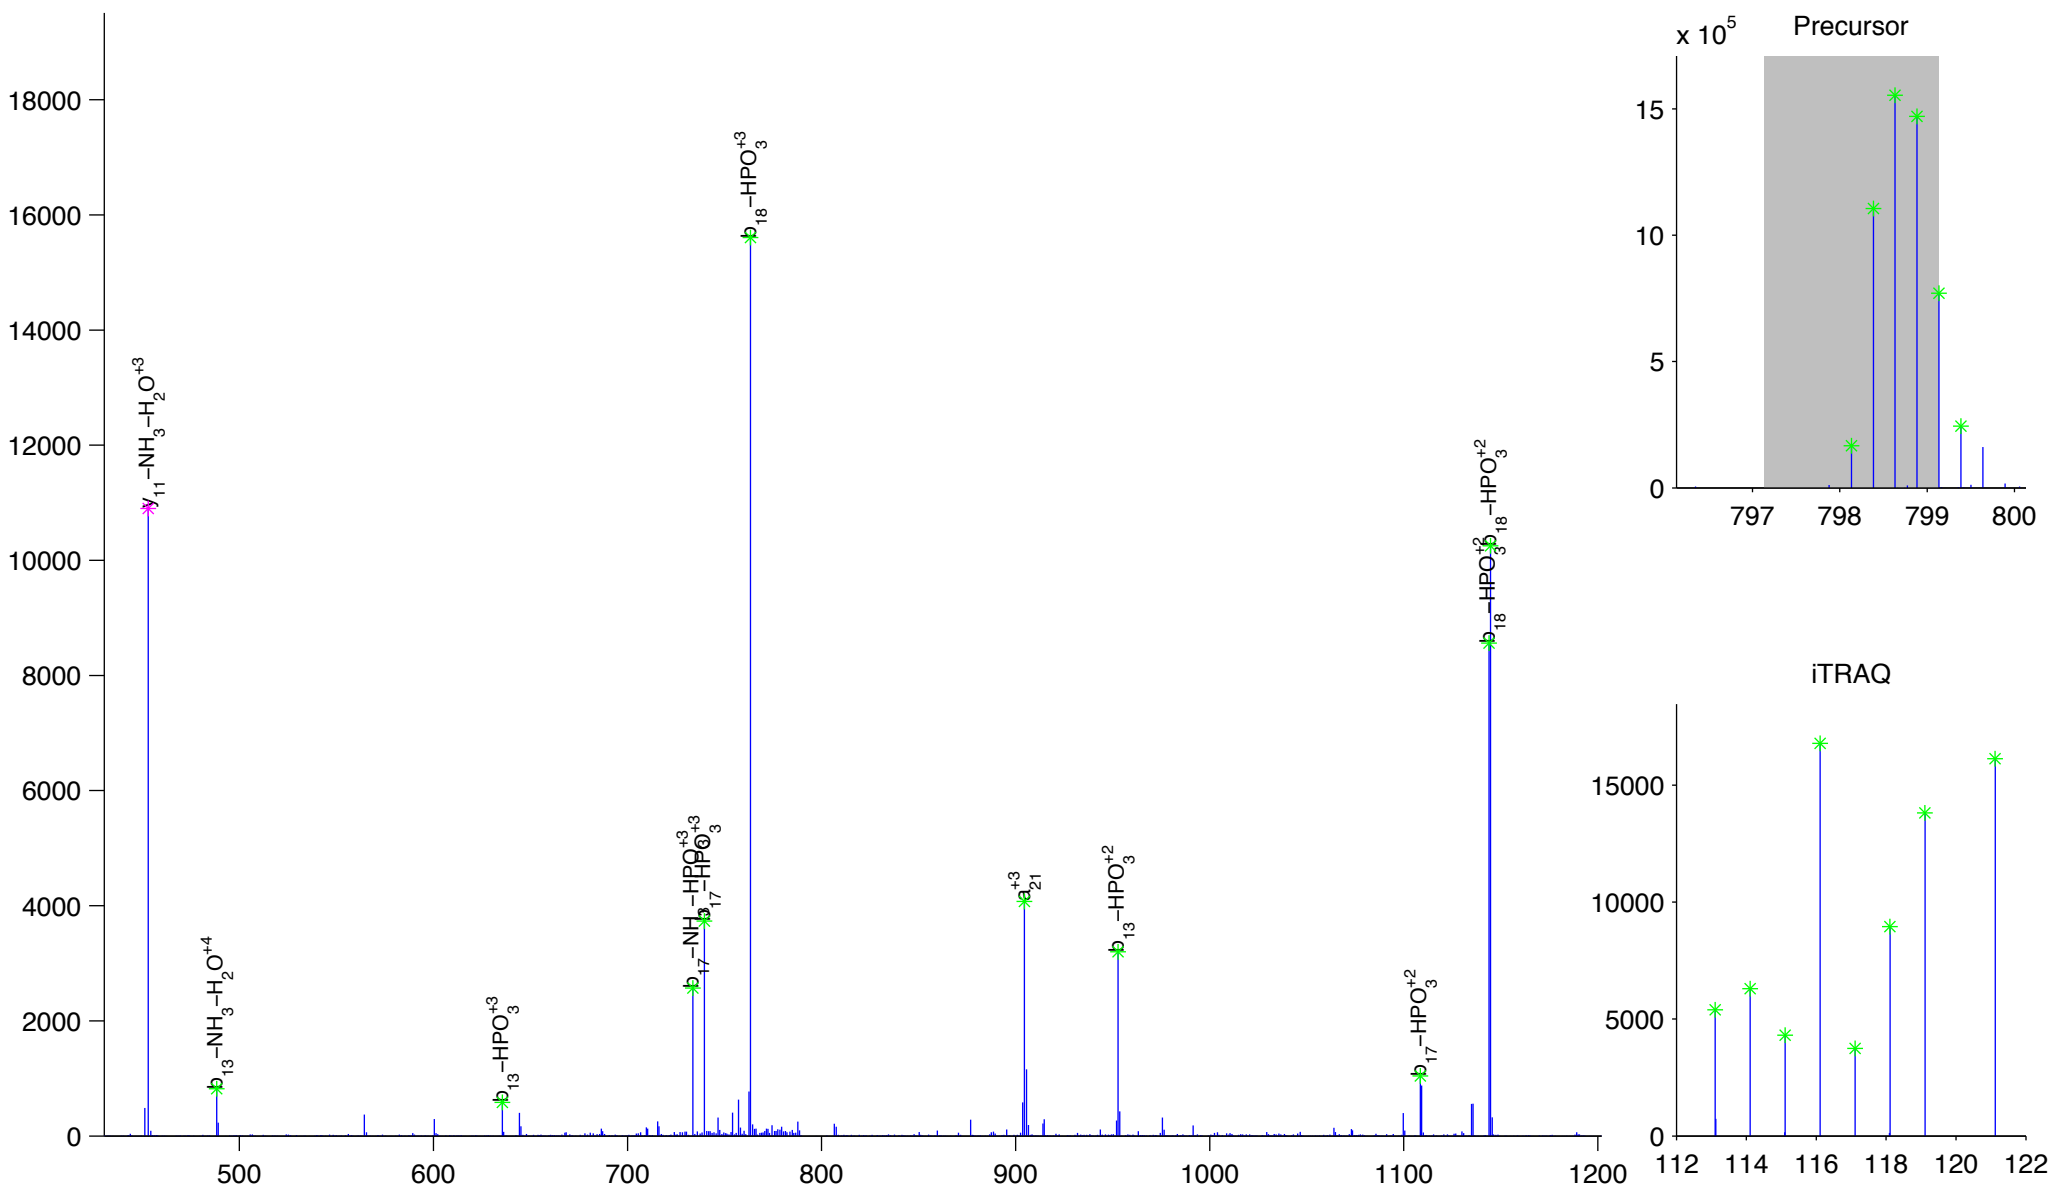



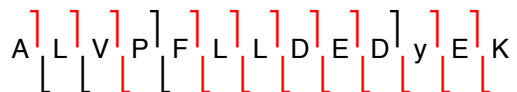

signal-transducing adaptor protein-2

Charge State: +3

Scan Number: 9036

File Name: 091130ptp1blivers\_hfd\_basal2.raw

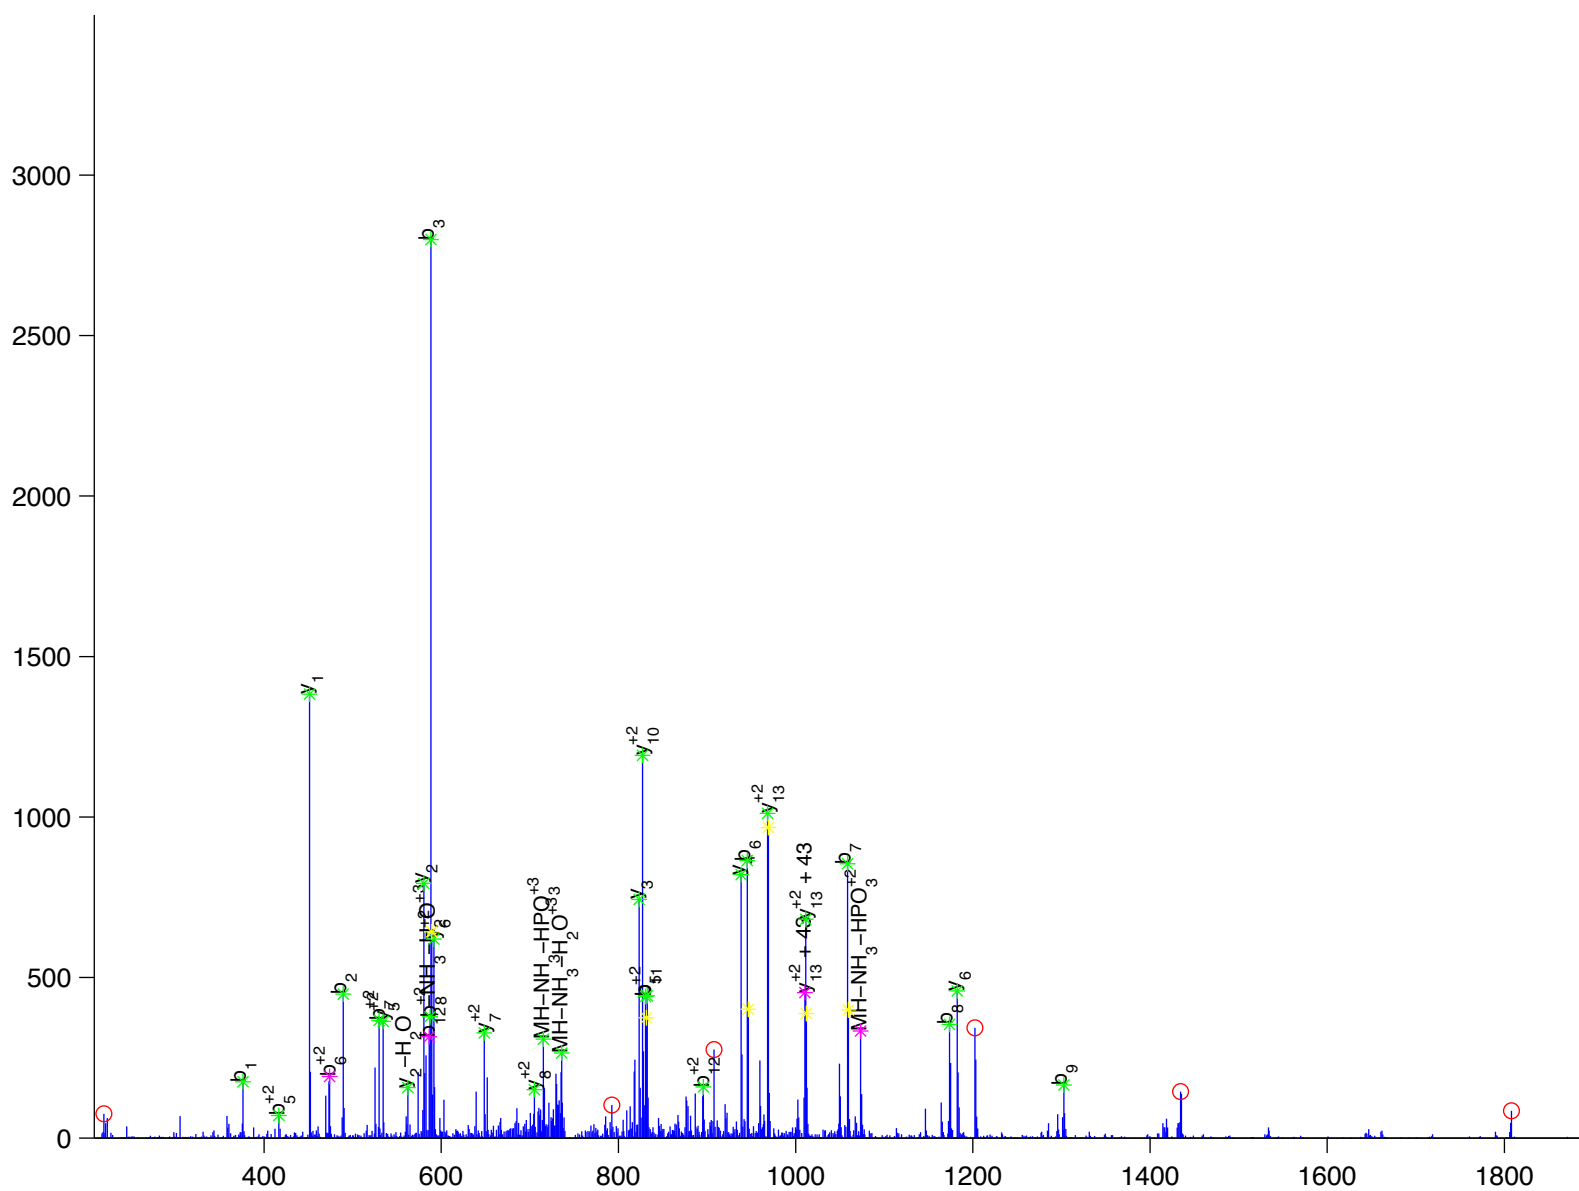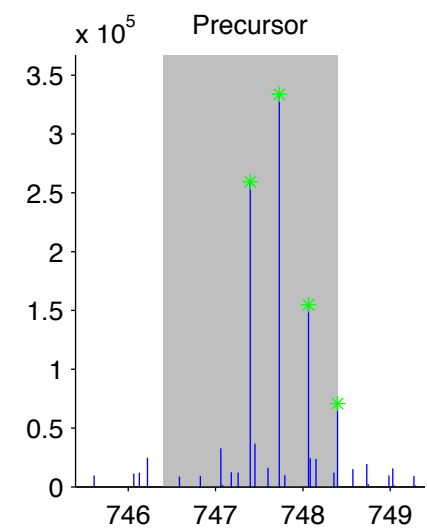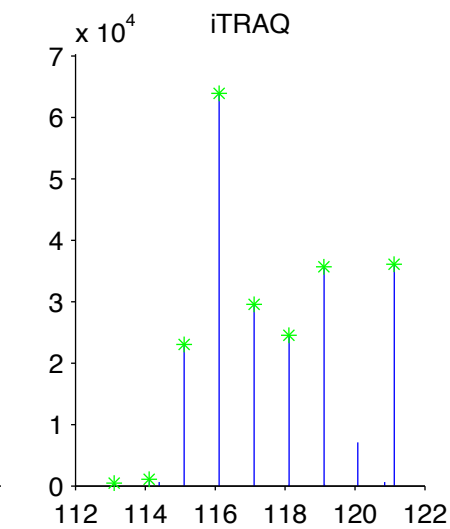

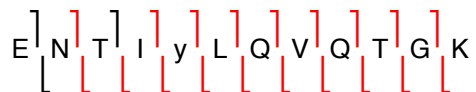

solute carrier family 22 member 1

Charge State: +3

Scan Number: 5100

File Name: 090806ptp1blivers\_M\_NC2.raw

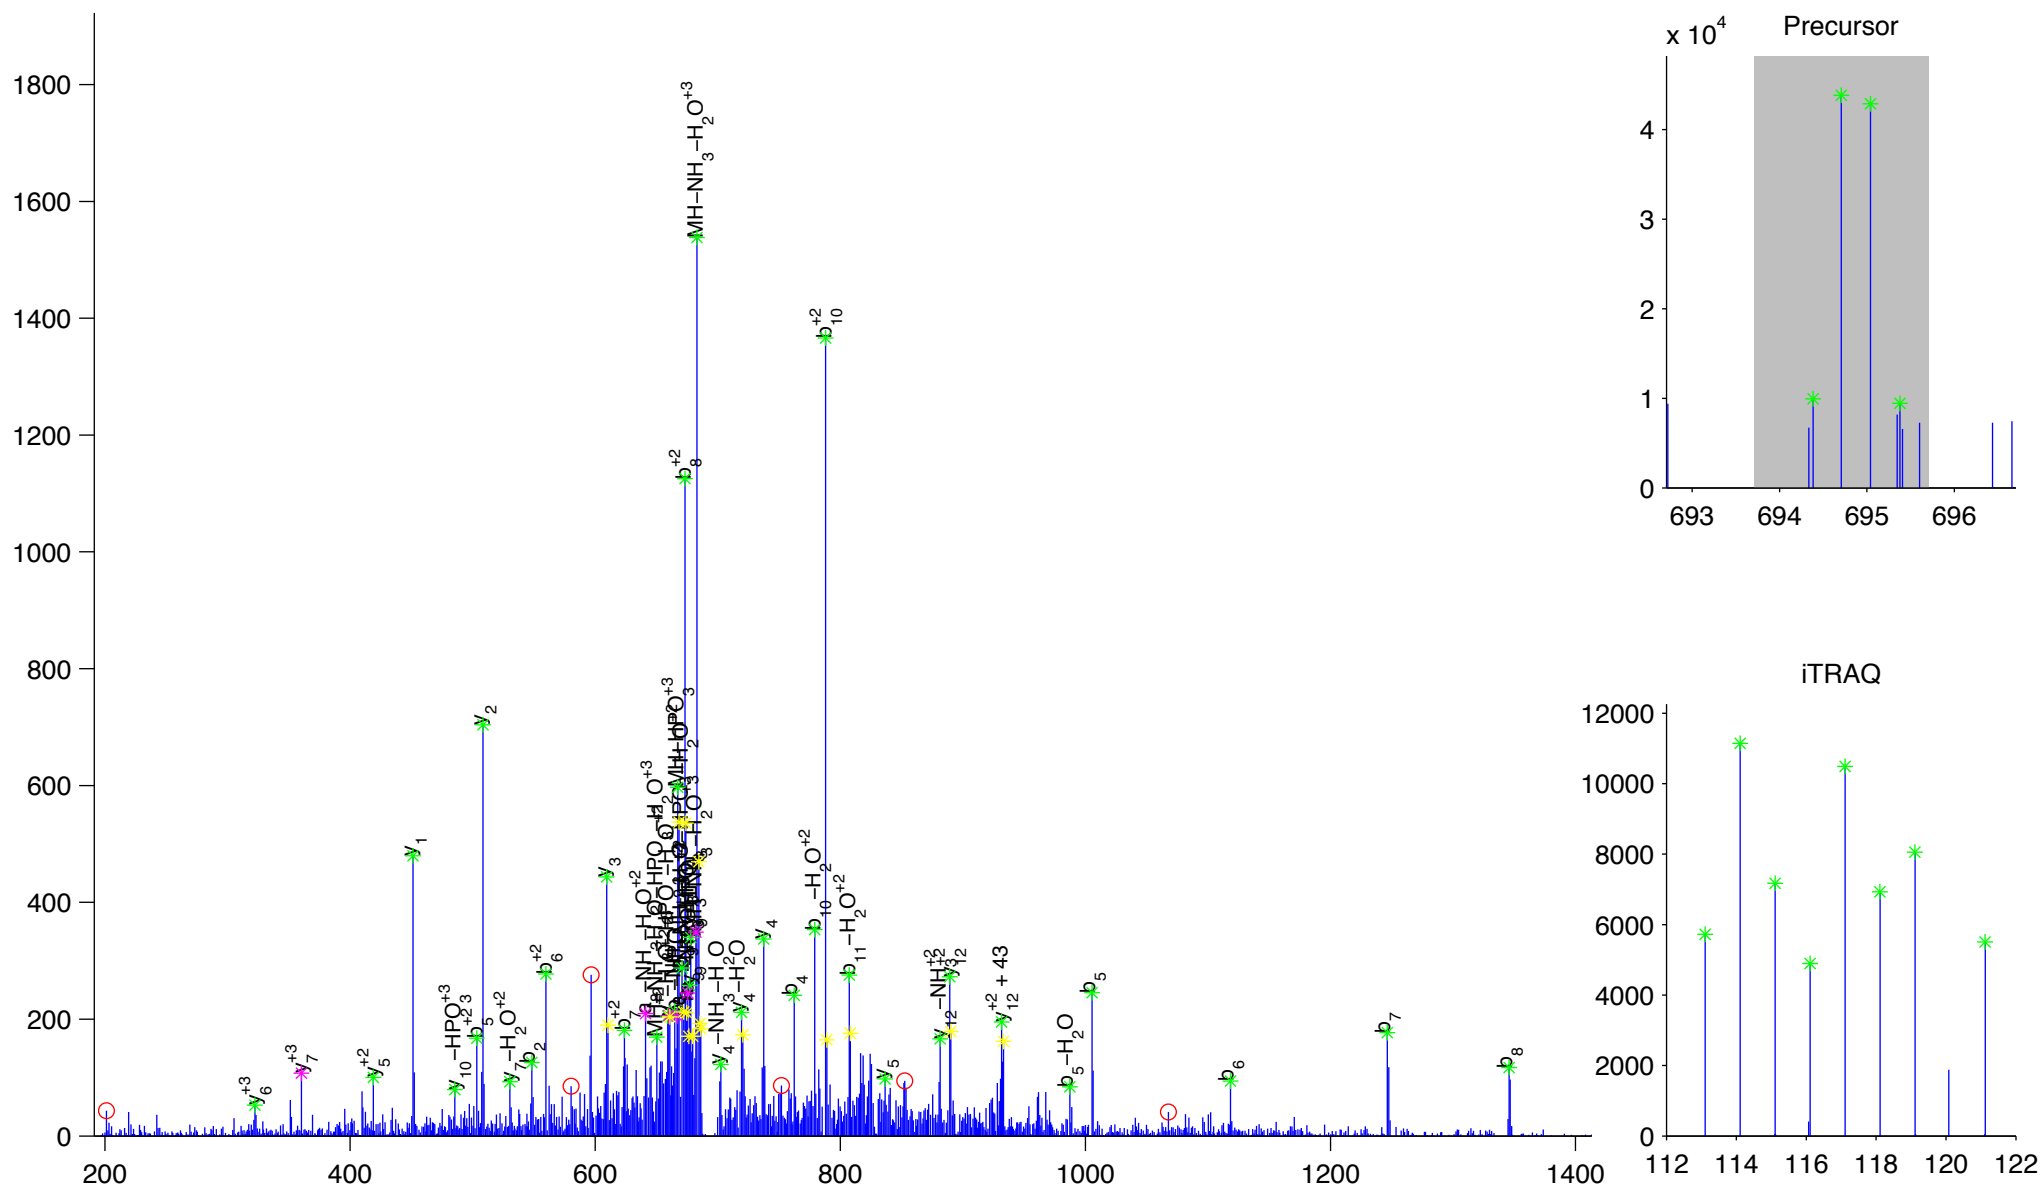

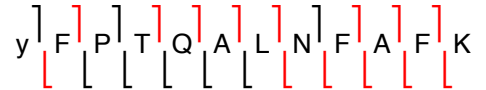

solute carrier family 25, member 5  
Charge State: +3  
Scan Number: 4465  
File Name: HJ072909\_HFD\_E1\_2.raw

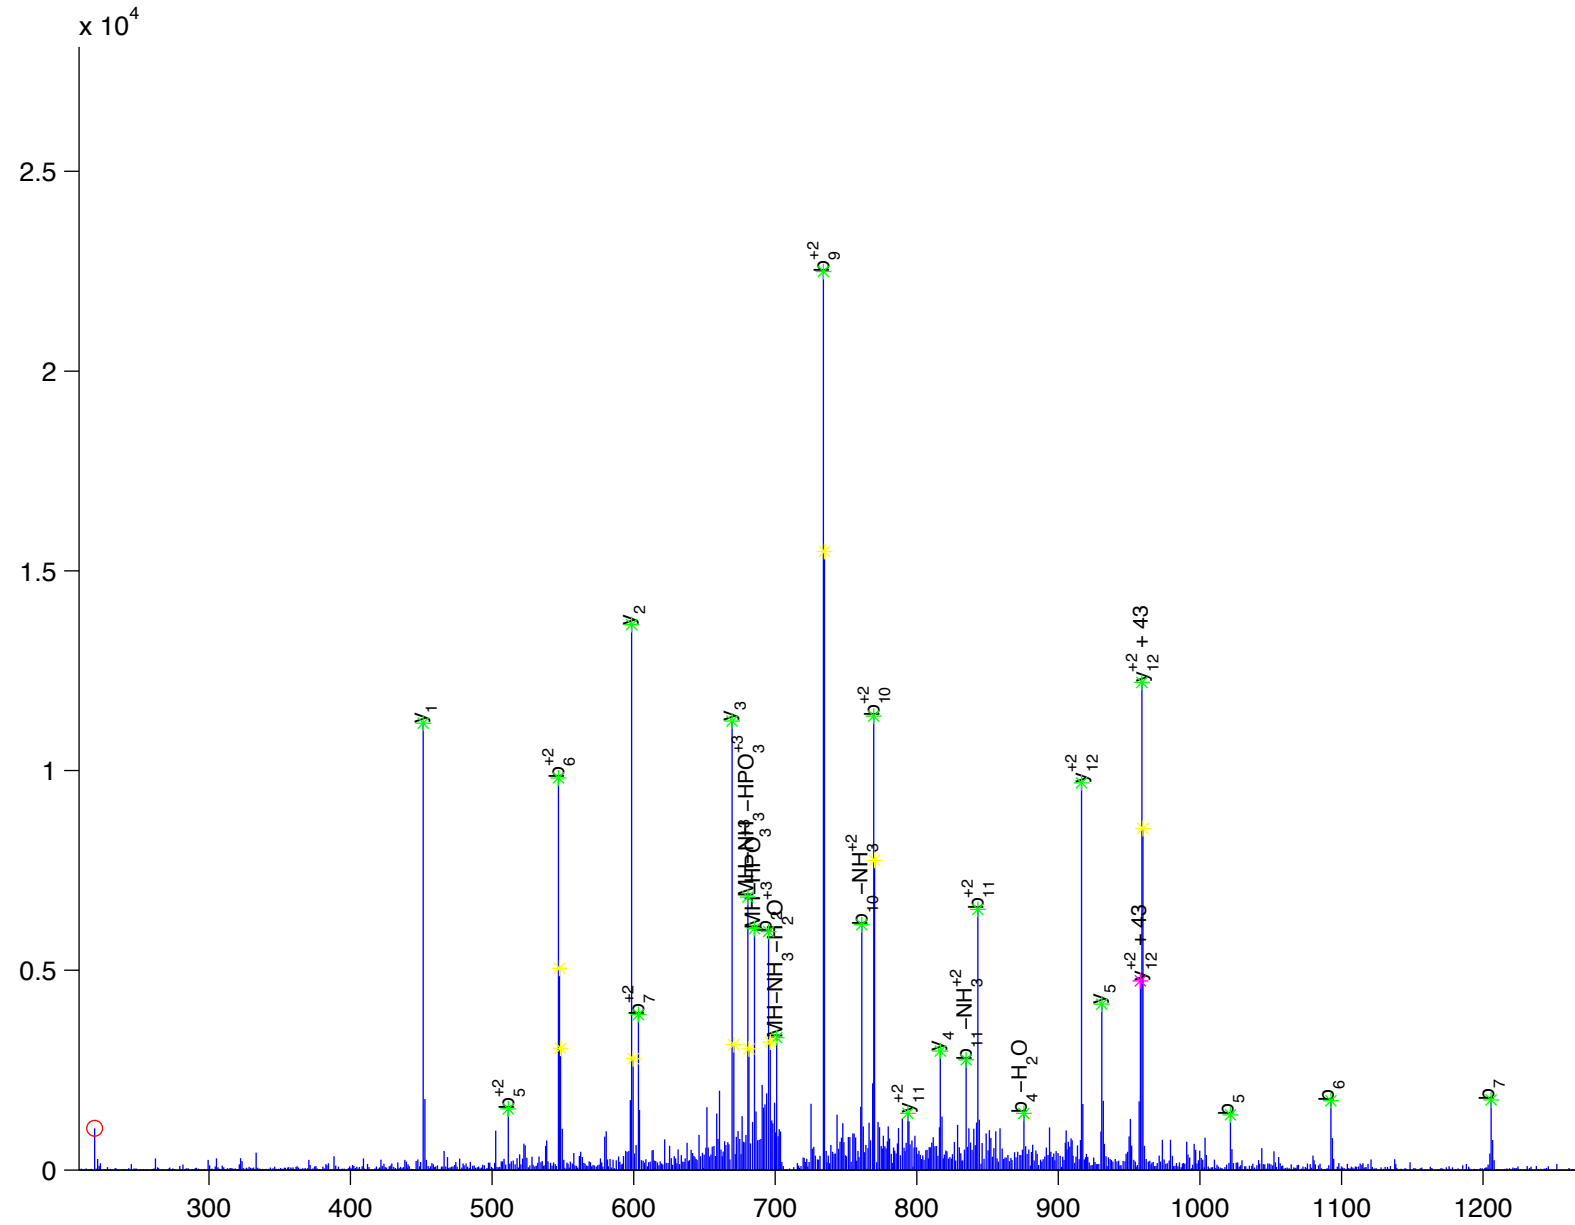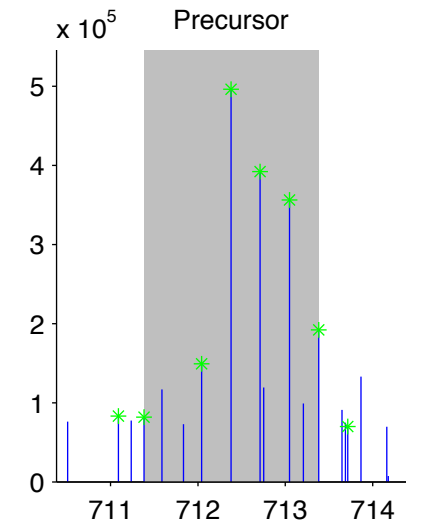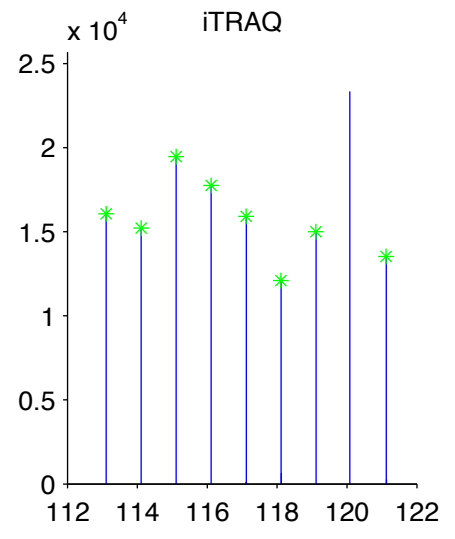

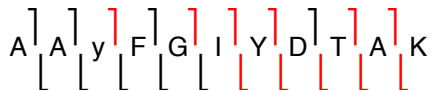

solute carrier family 25, member 5

Charge State: +3

Scan Number: 6575

File Name: 091130ptp1blivers\_hfd\_basal2.raw

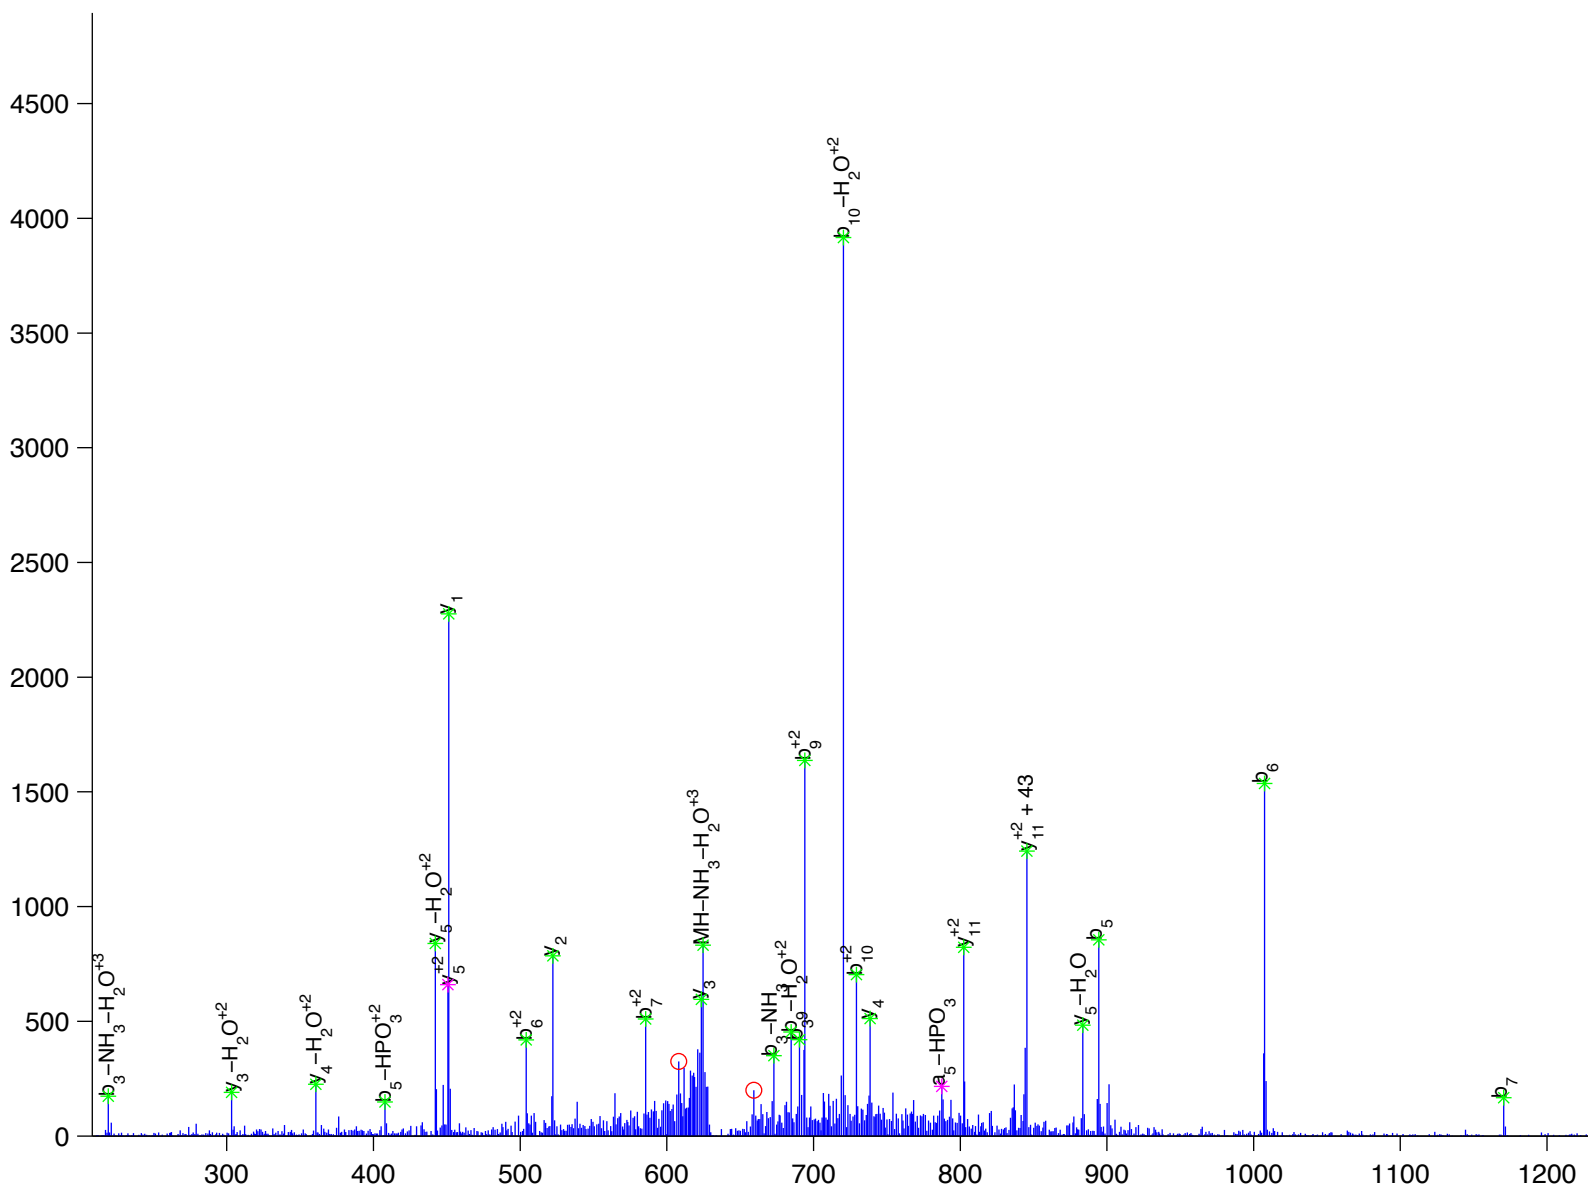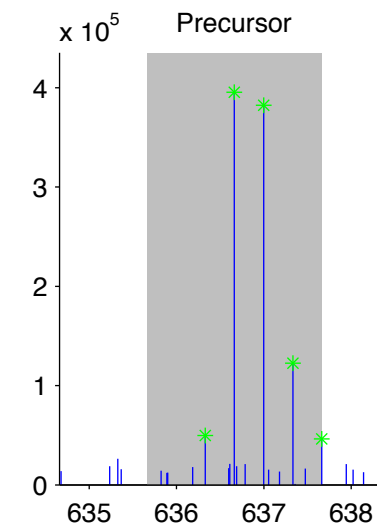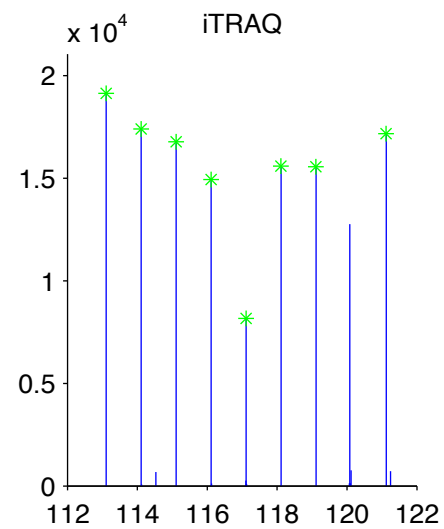

S [ Q ] P [ I ] D [ D ] E [ I ] y [ E ] E [ L ] P [ E ] E [ E ] E [ D ] T [ A ] S [ V ] K

src family associated phosphoprotein 2

Charge State: +3

Scan Number: 6887

File Name: 091130ptp1blivers\_hfd\_basal2.raw

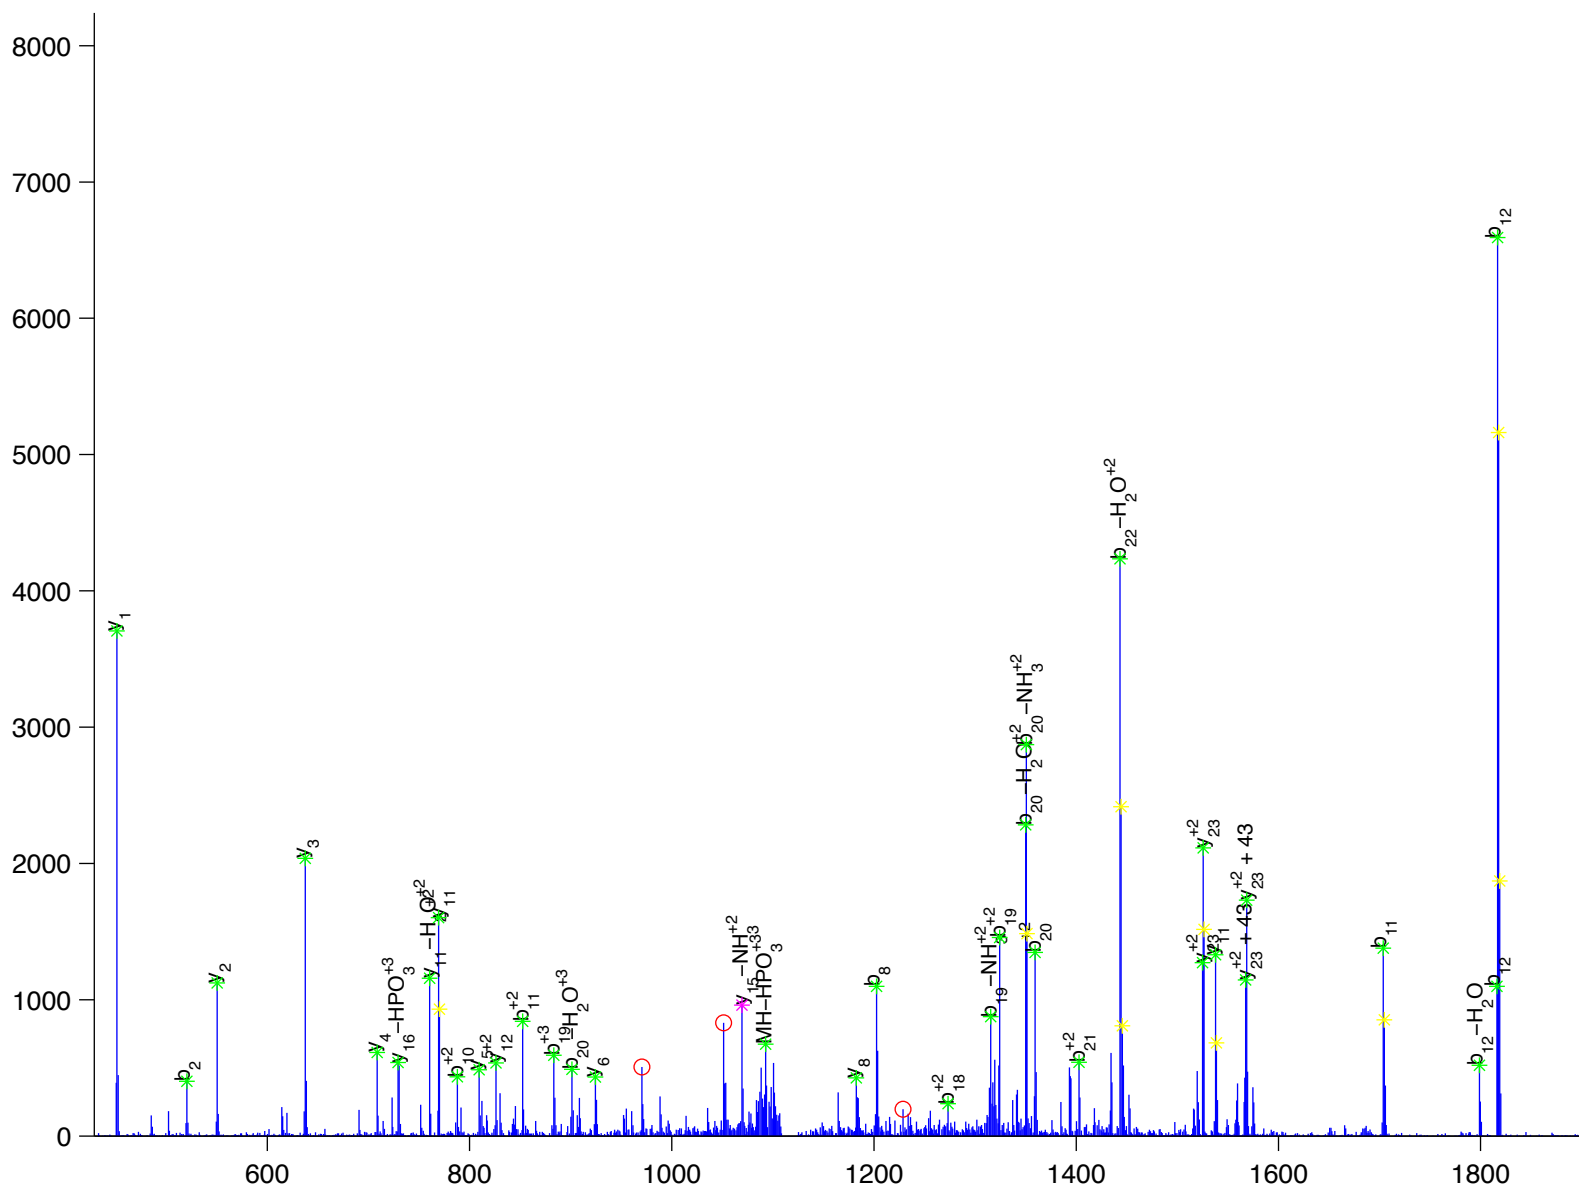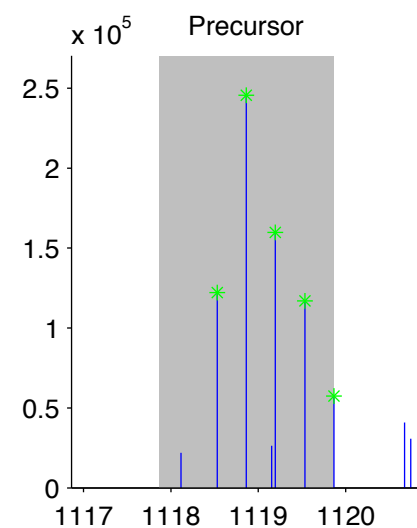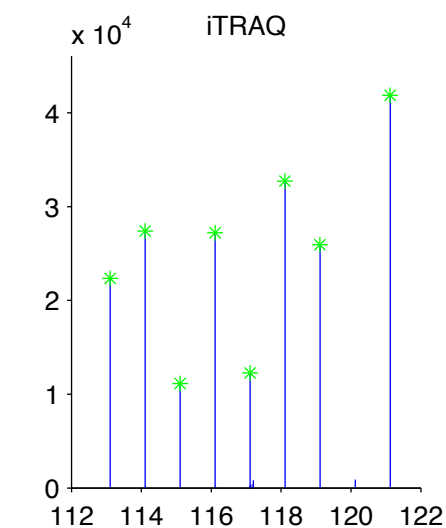

L [ P ] E [ D ] D [ E ] R [ P ] P [ E ] E [ y ] D [ Q ] P [ W ] E [ W ] K

Src homology 2 domain containing F

Charge State: +3

Scan Number: 5488

File Name: 090728ptp1blivers\_M\_NC\_ins\_e.raw

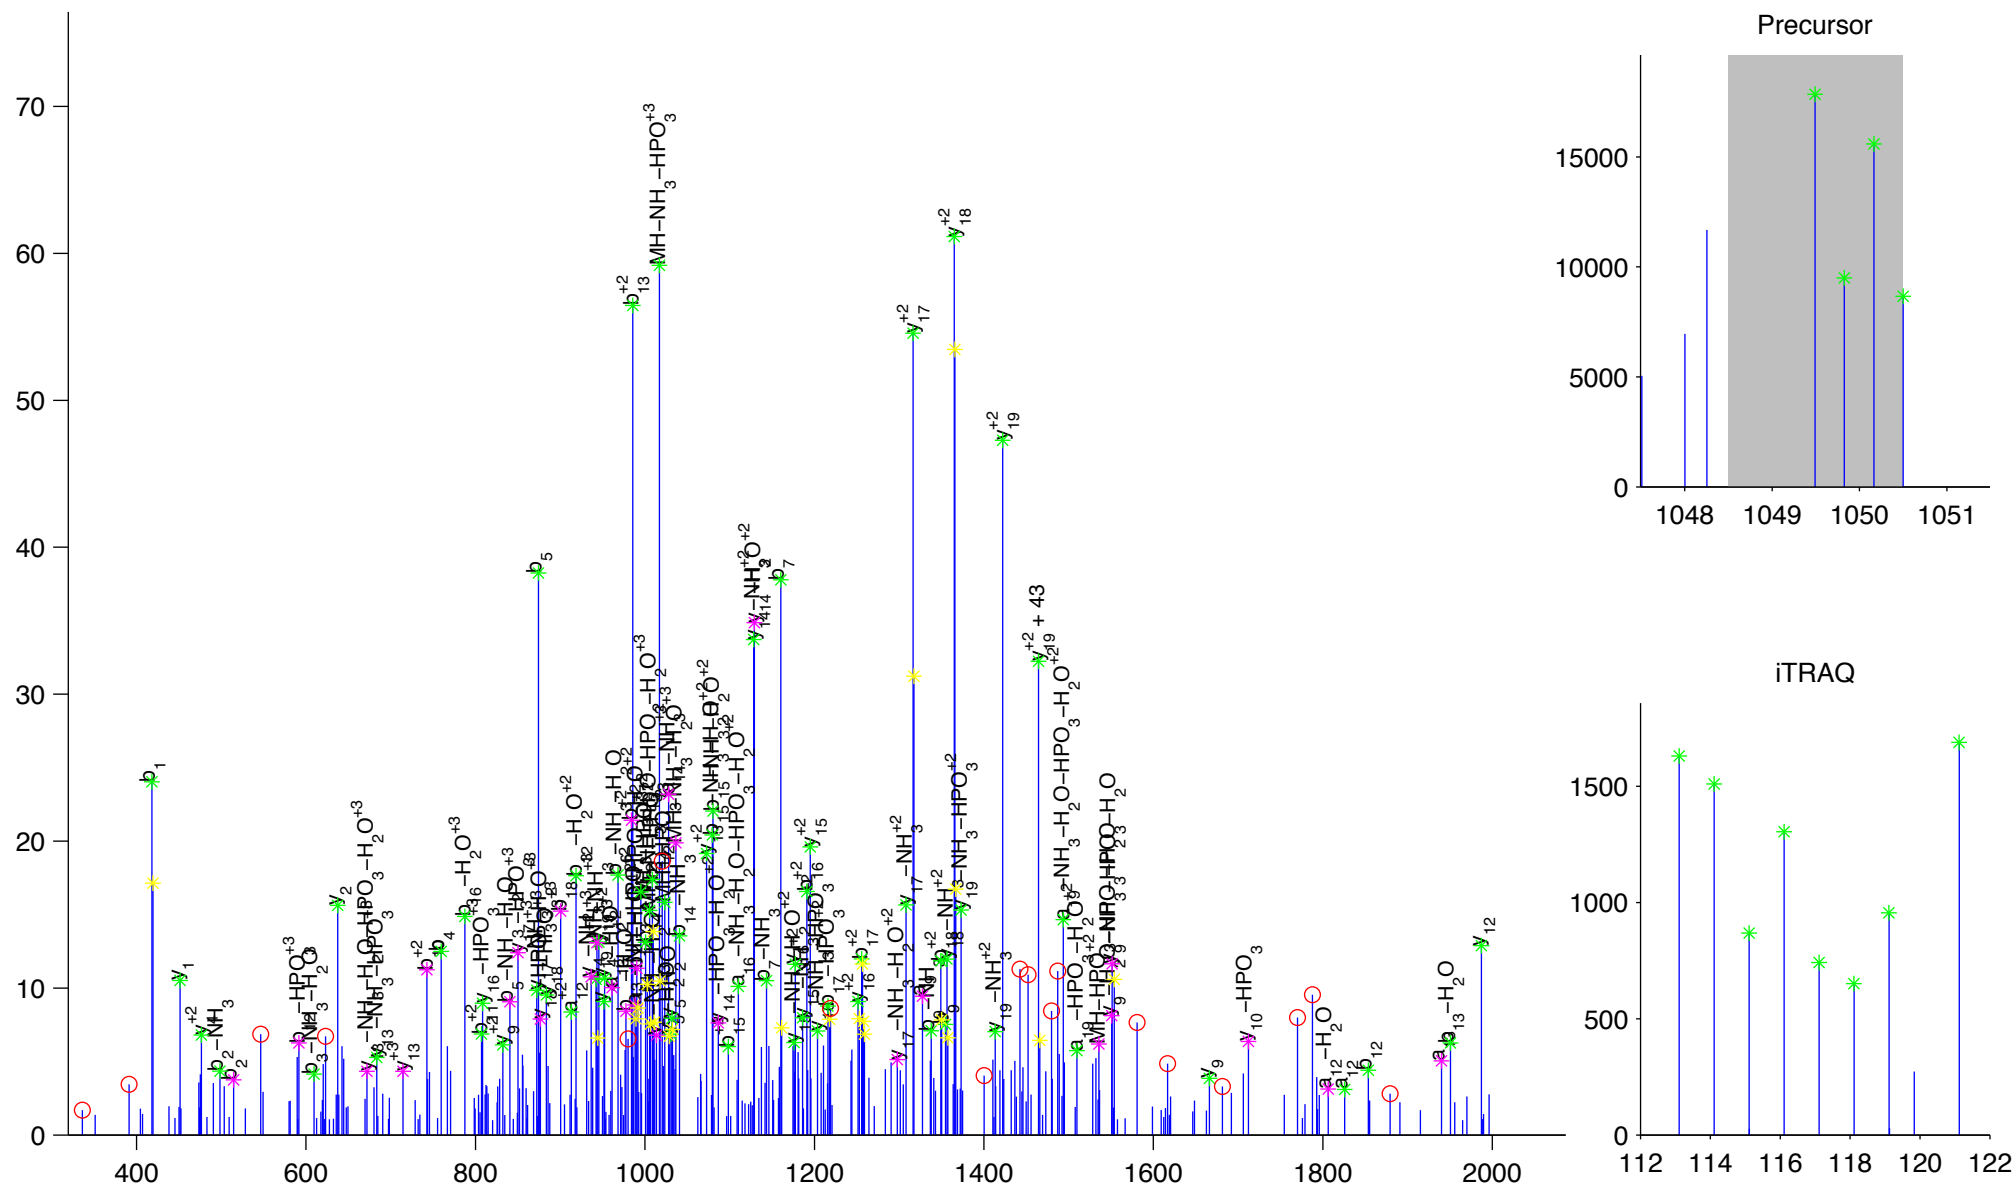

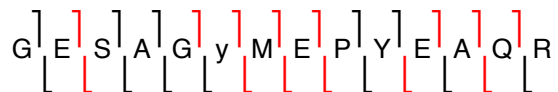

src homology 2 domain-containing transforming protein B

Charge State: +3

Scan Number: 3113

File Name: 100827ptp1blivers\_ncHFD\_basal.raw

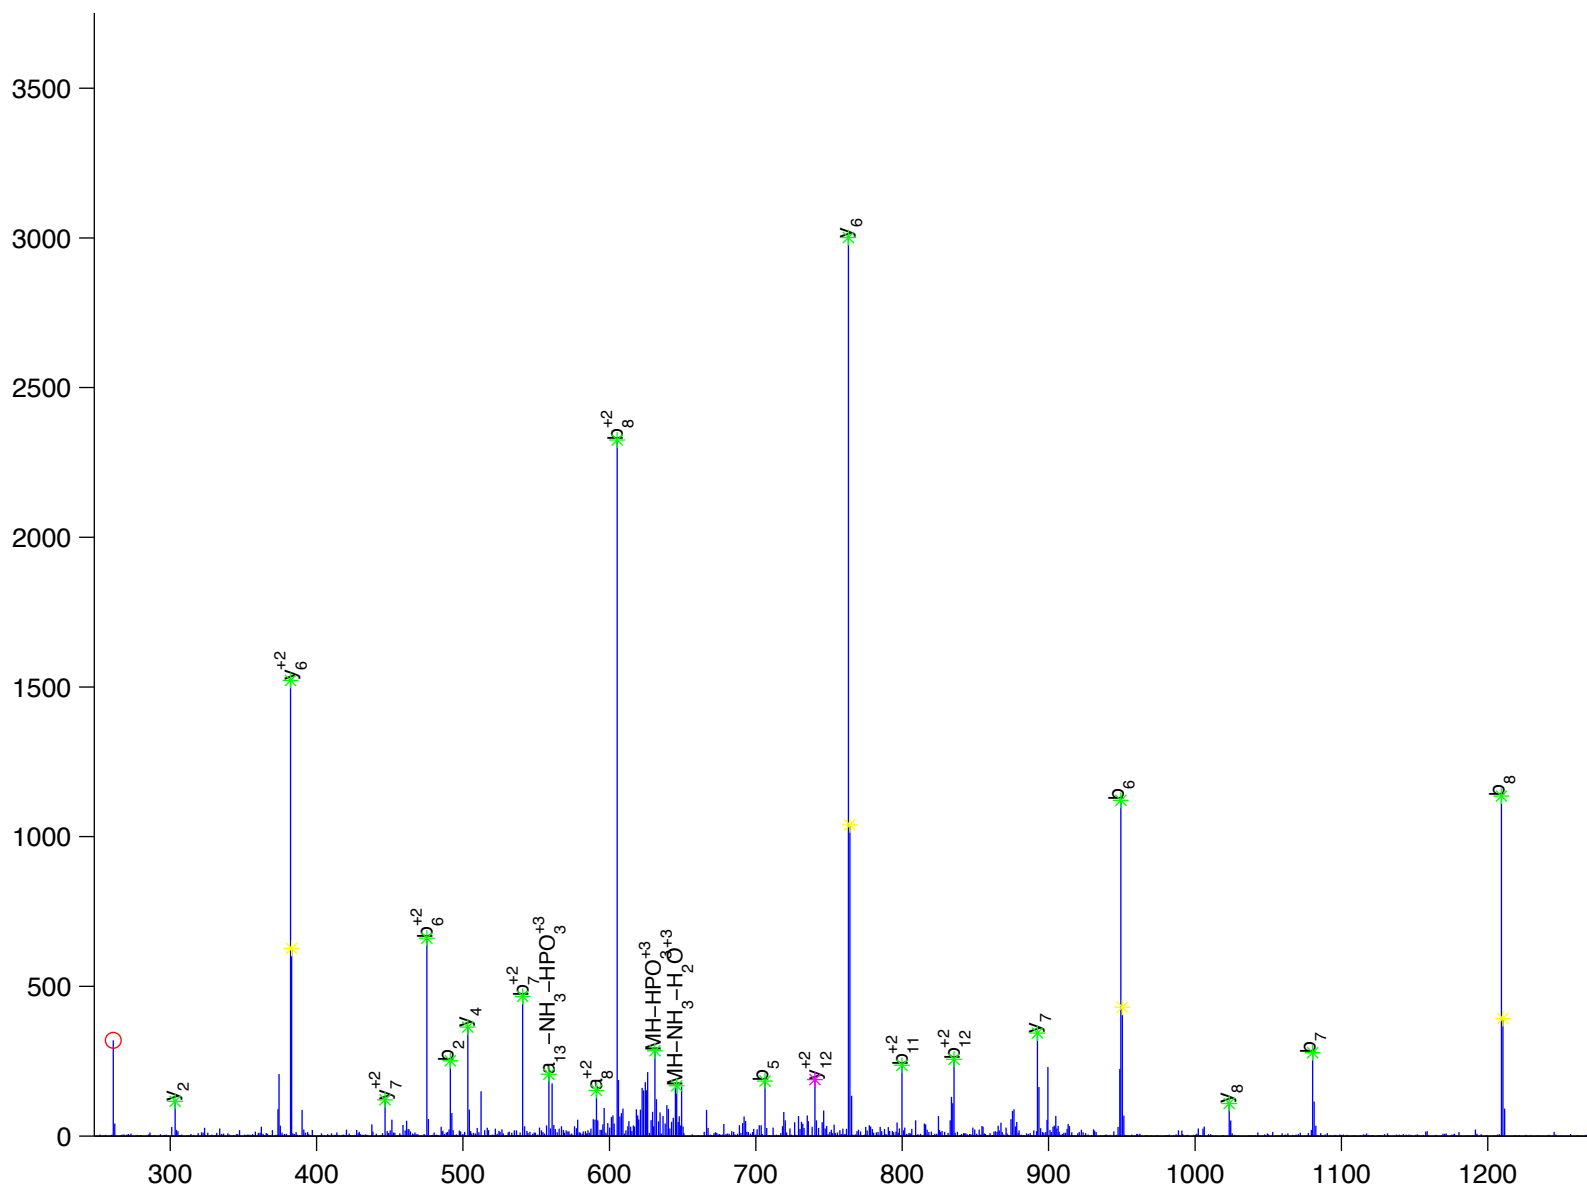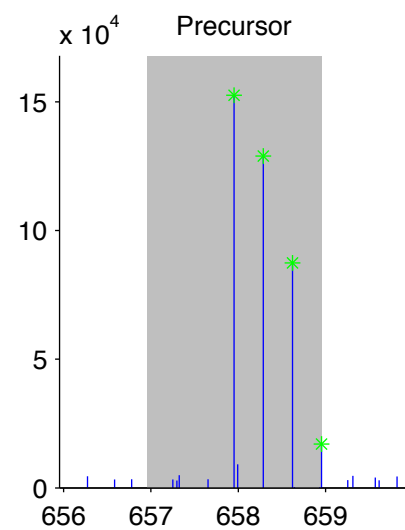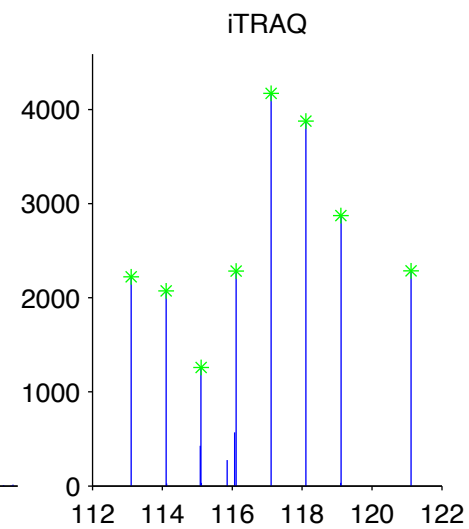

L [ P ] [ Q ] [ D ] [ D ] [ D ] [ R ] [ P ] [ A ] [ D ] [ E ] [ y ] [ D ] [ Q ] [ P ] [ W ] [ E ] [ W ] [ N ] [ R ]

src homology 2 domain-containing transforming protein B

Charge State: +3

Scan Number: 6491

File Name: 091130ptp1blivers\_hfd\_basal2.raw

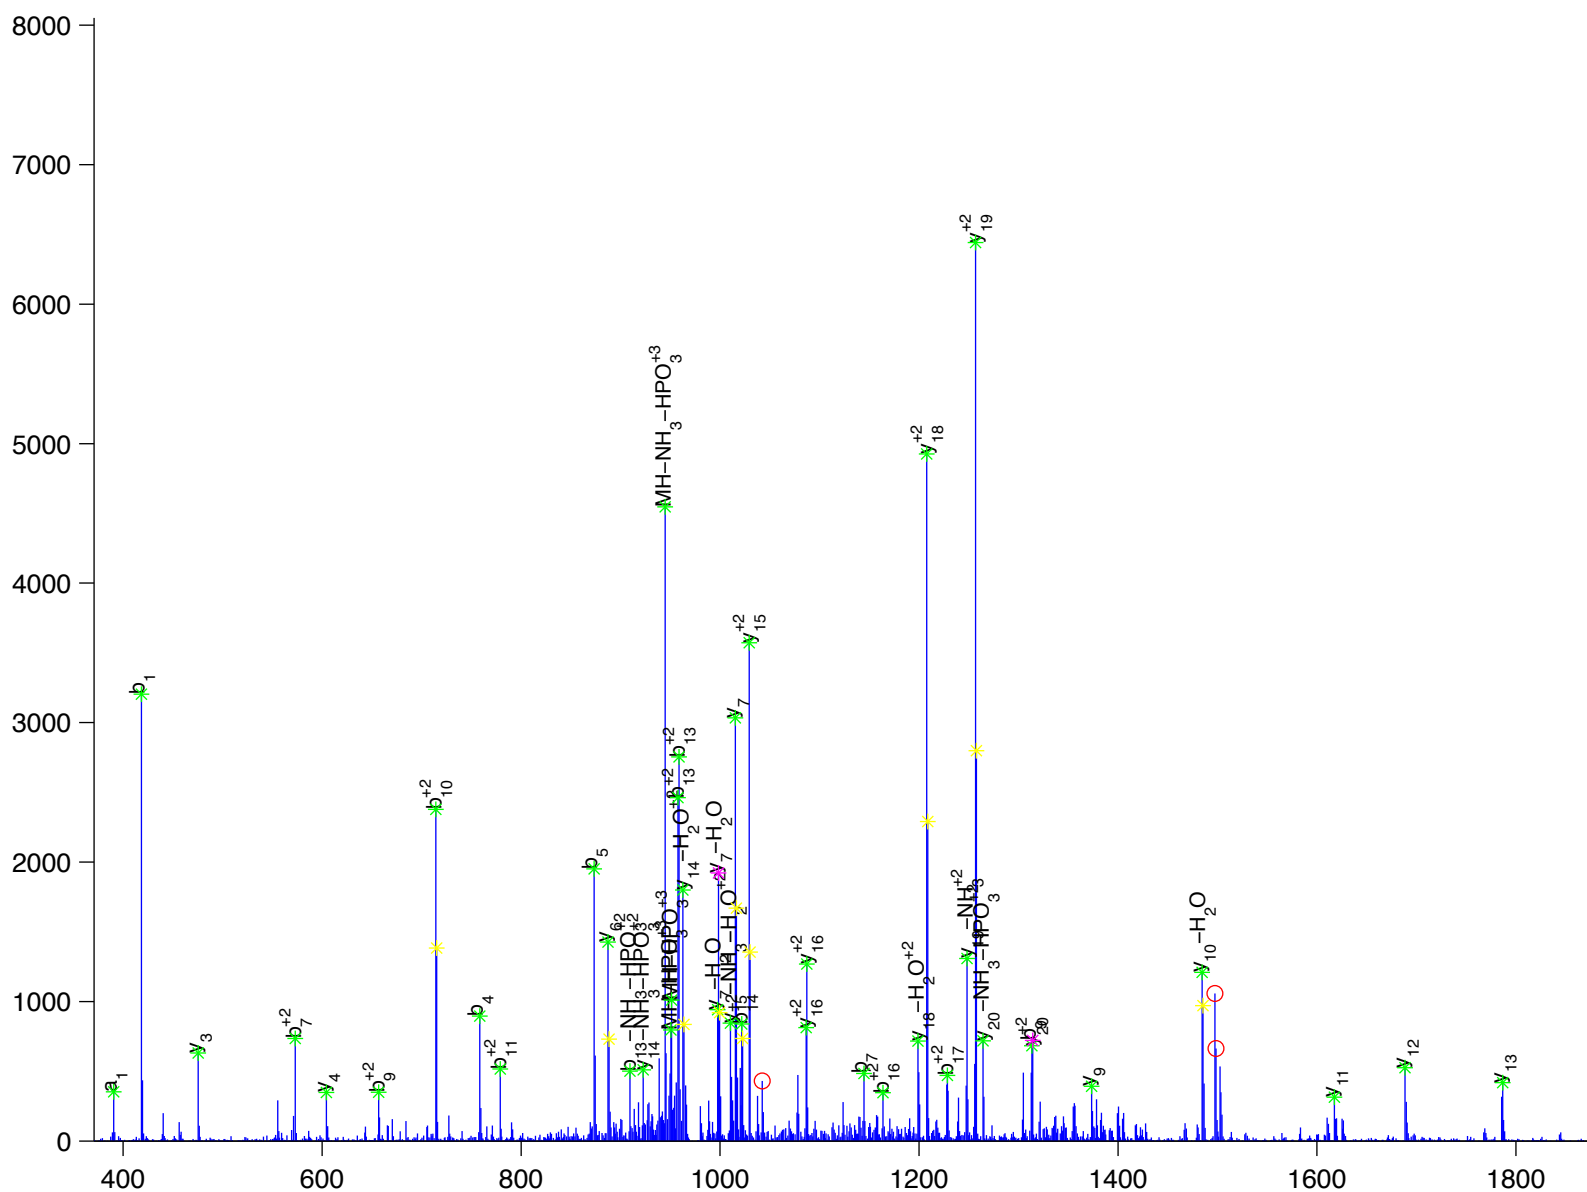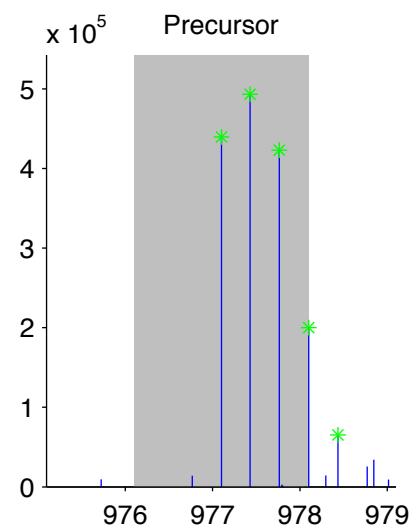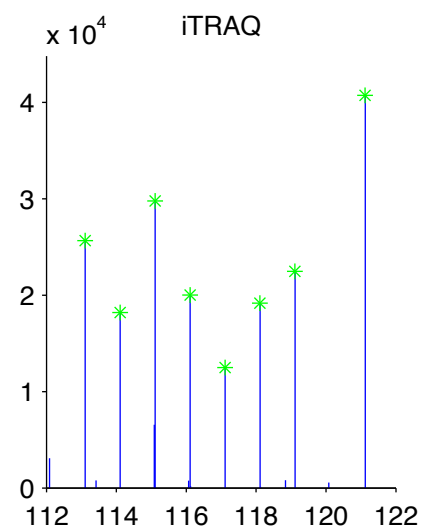



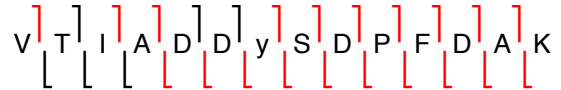

src homology 2 domain-containing transforming protein B  
 Charge State: +3  
 Scan Number: 8852  
 File Name: 090807ptp1blivers\_M\_HFD\_basal.raw

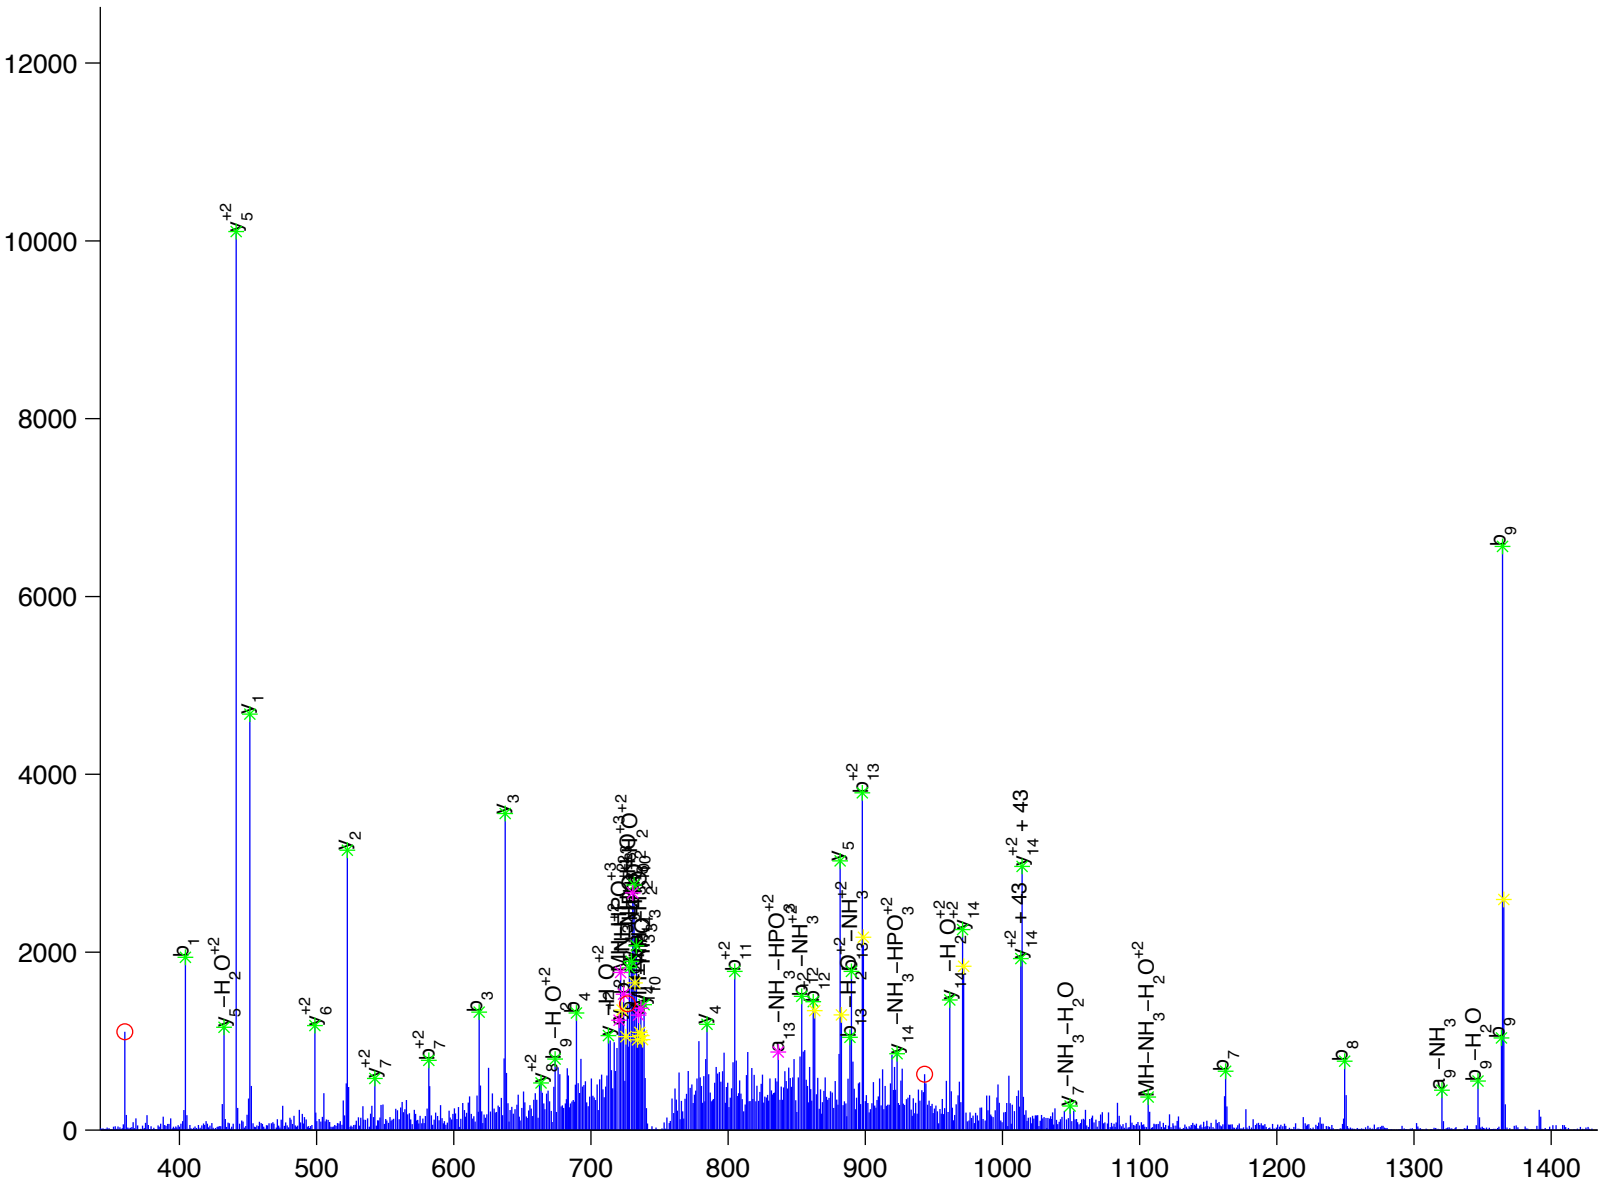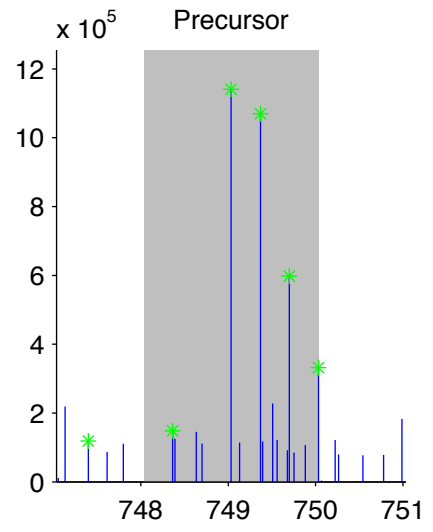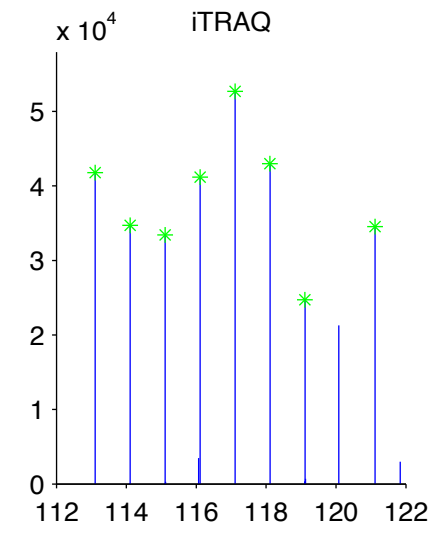

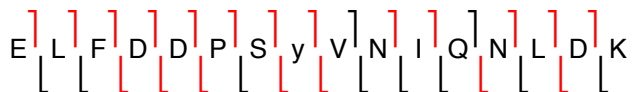

src homology 2 domain-containing transforming protein C

Charge State: +4

Scan Number: 5946

File Name: 100905ptp1blivers\_ncHFD\_basal.raw

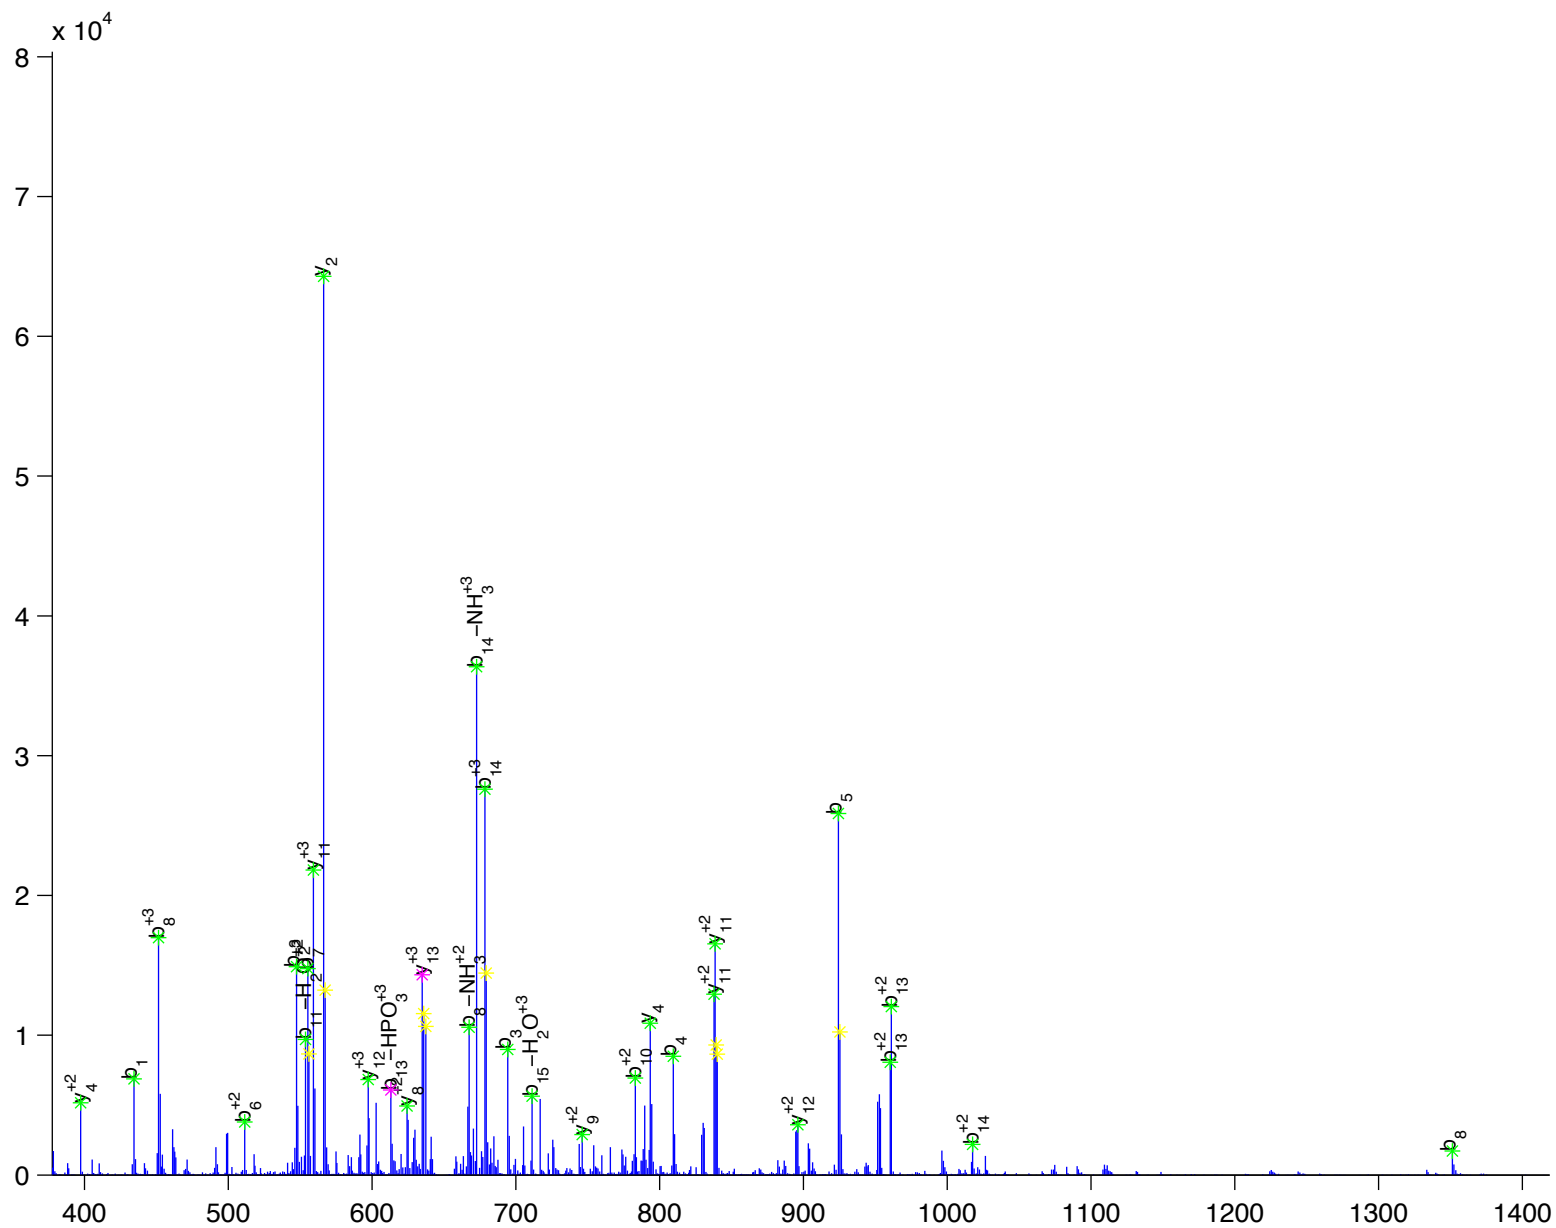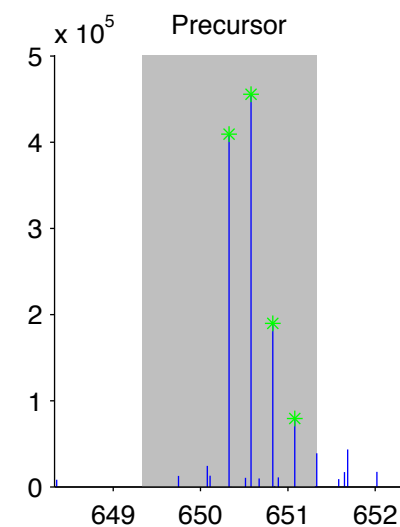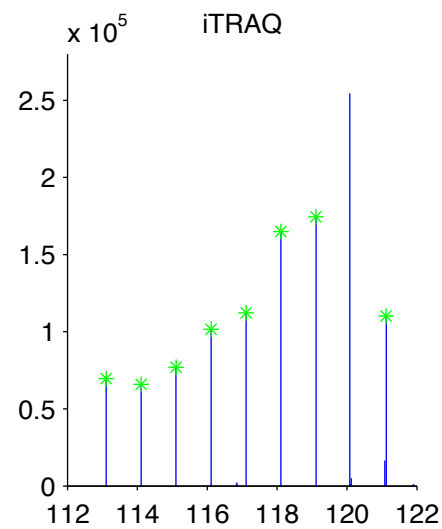

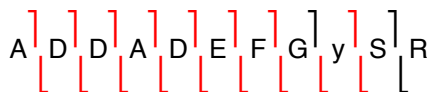

staphylococcal nuclease domain containing 1  
Charge State: +2  
Scan Number: 4506  
File Name: 091130ptp1blivers\_hfd\_basal2.raw

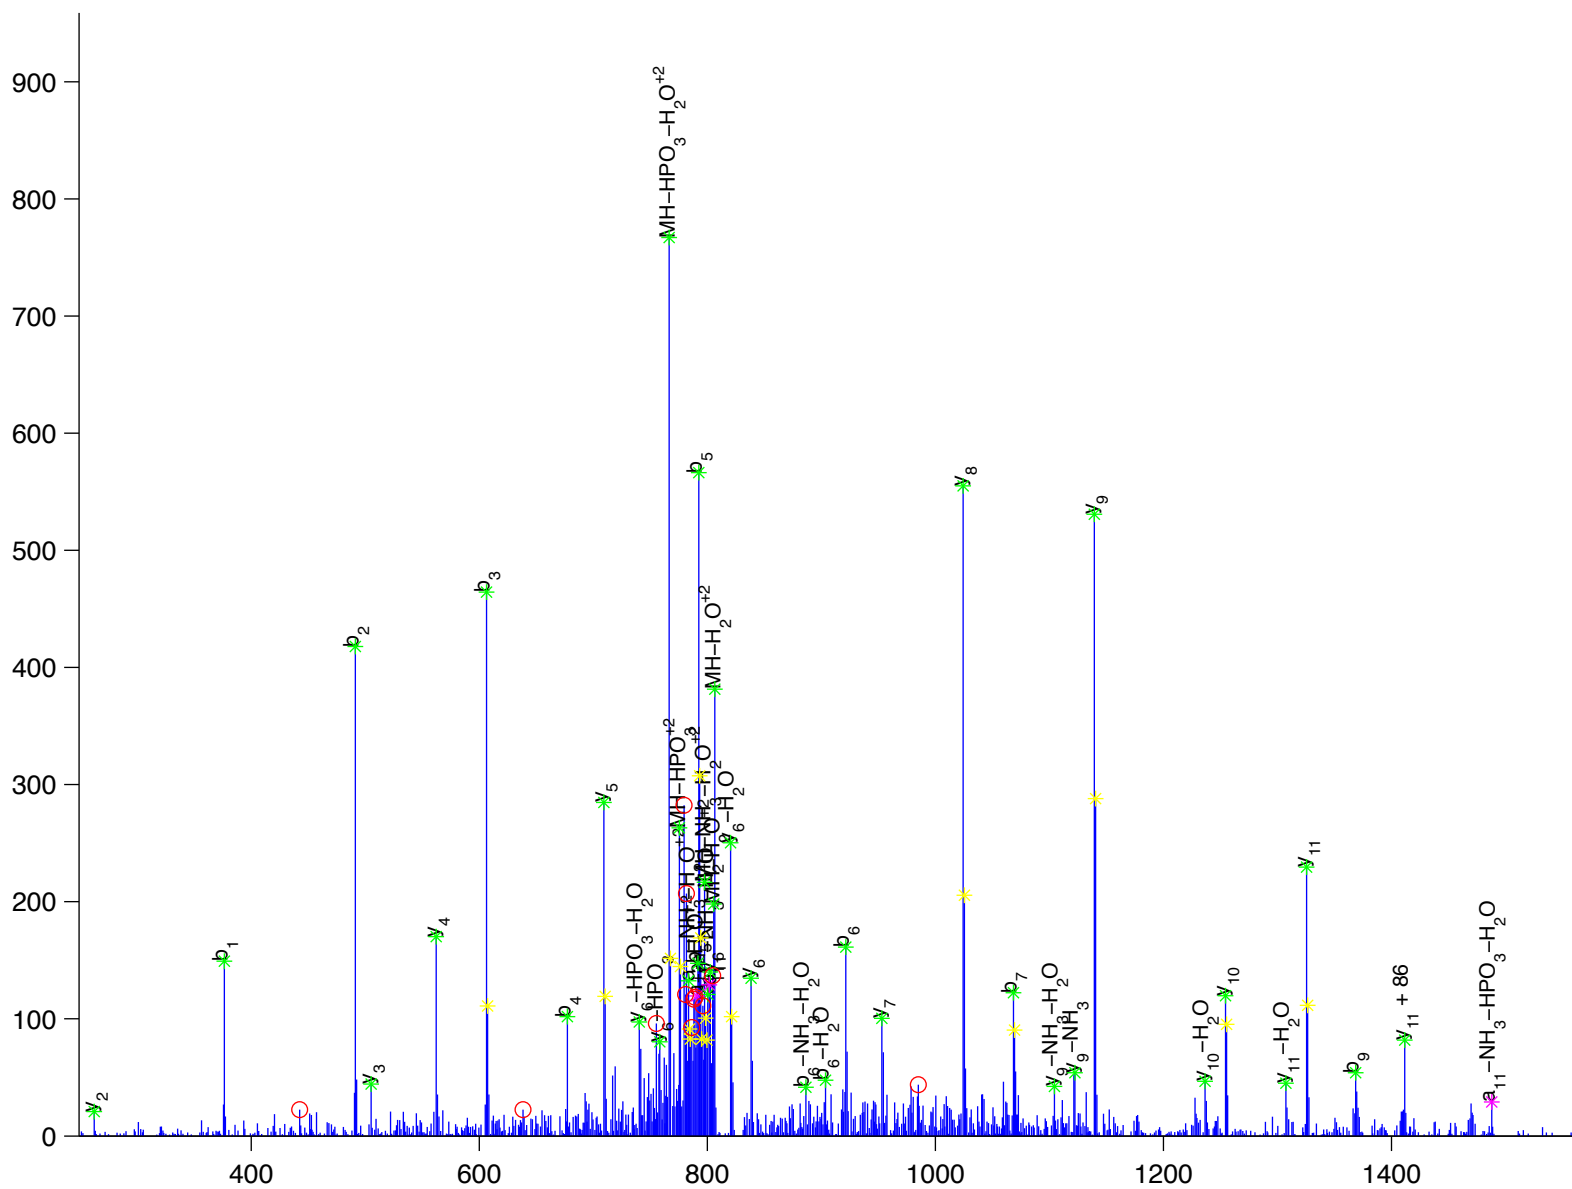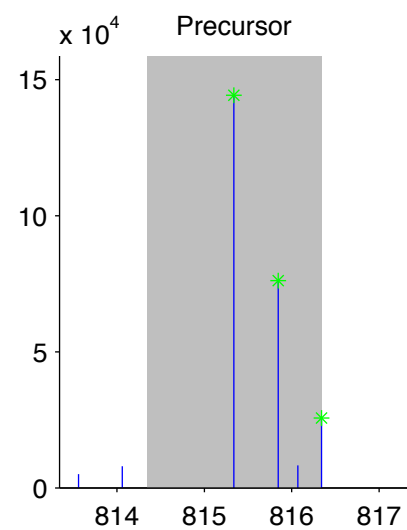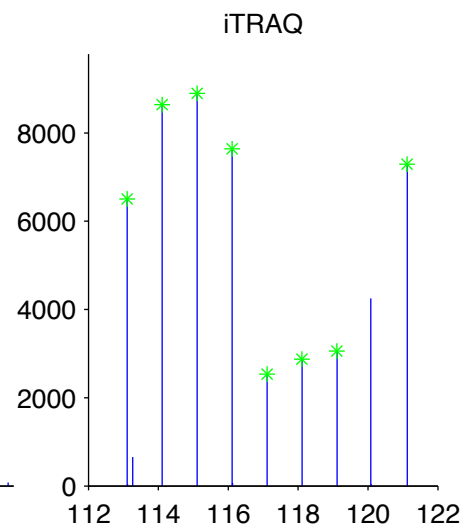

E [ y ] G [ M ] I [ Y ] L [ G ] K

staphylococcal nuclease domain containing 1  
Charge State: +3  
Scan Number: 7338  
File Name: 090806ptp1blivers\_M\_NC2.raw

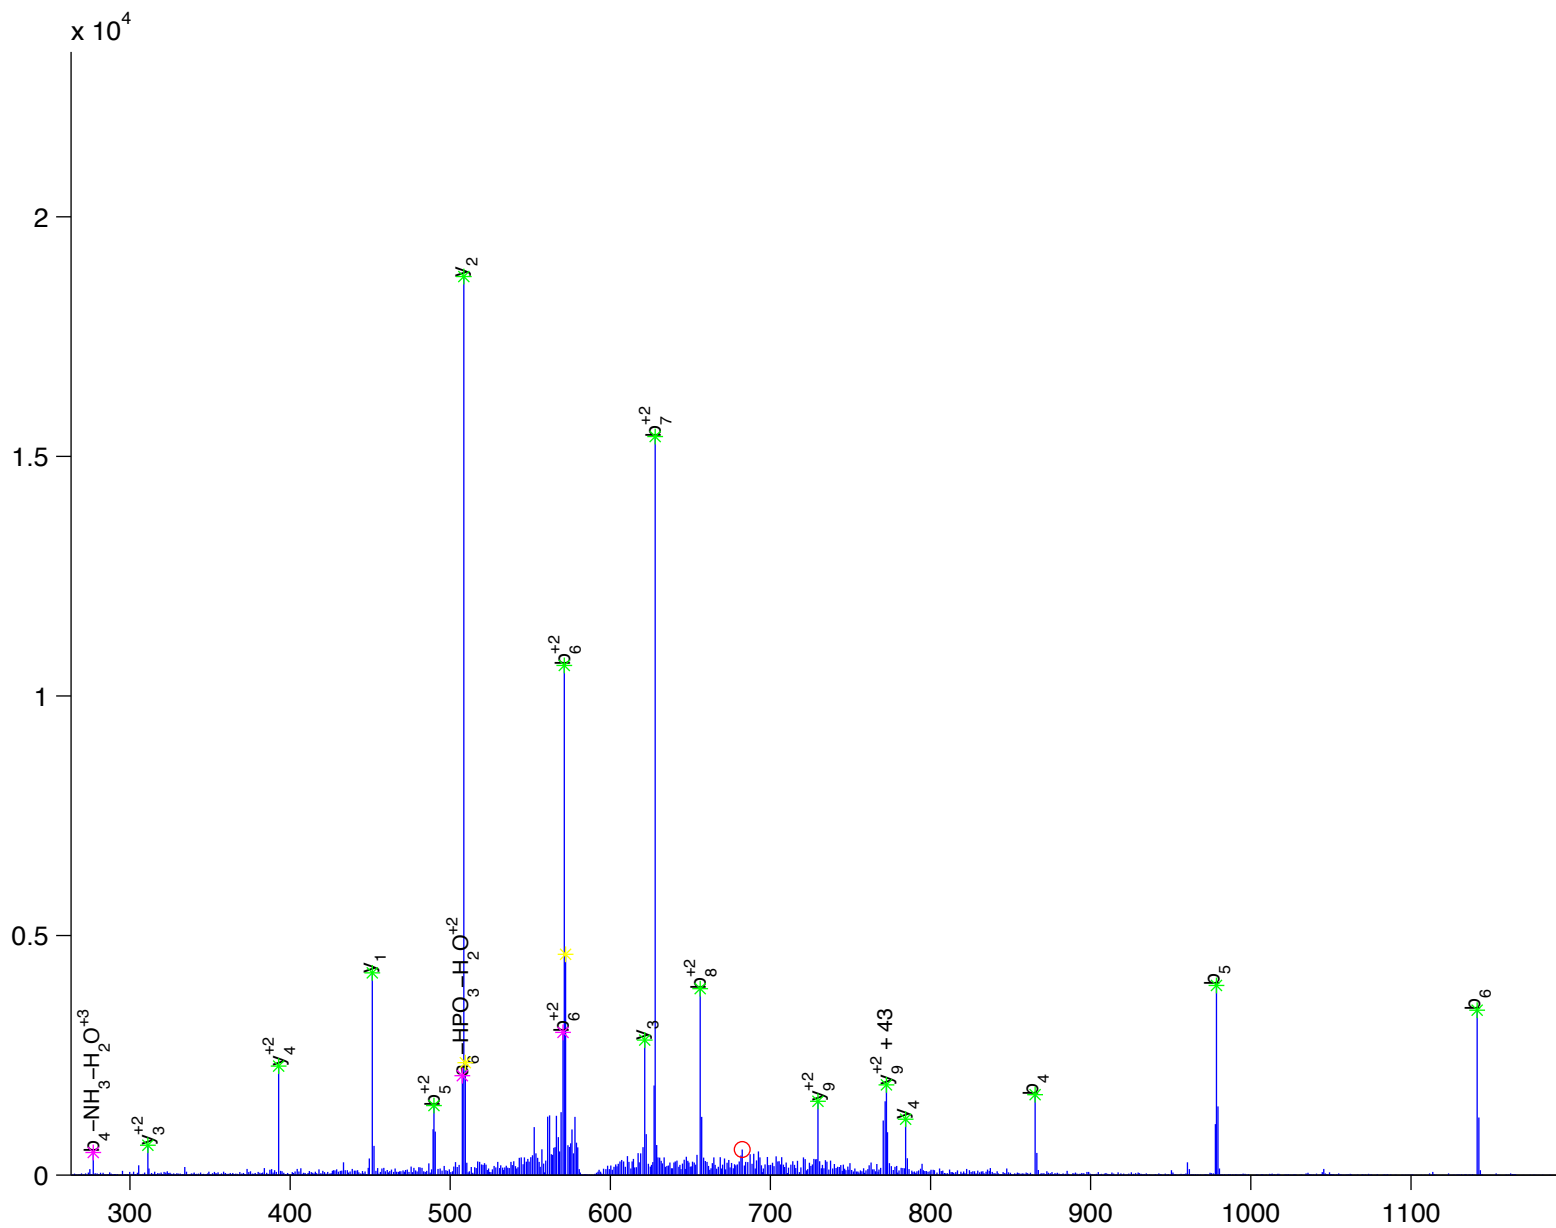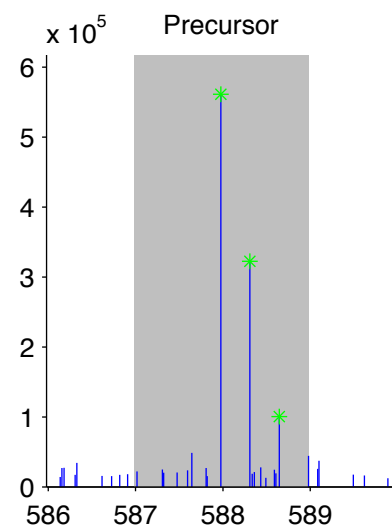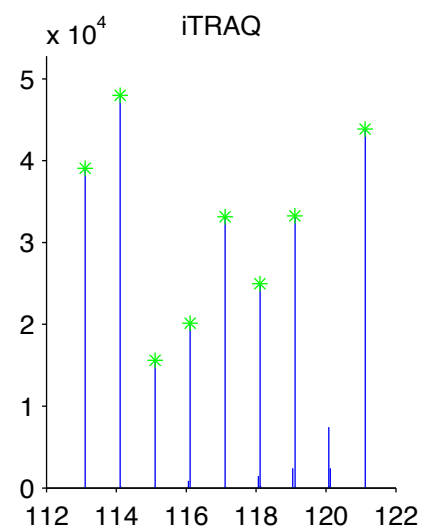

H[S]V[N]N[T]y[S]Q[F]Q[D]E[Y]S[L]E[E]V[M]K

sterol carrier protein 2, liver

Charge State: +4

Scan Number: 8399

File Name: 090807ptp1blivers\_M\_HFD\_basal.raw

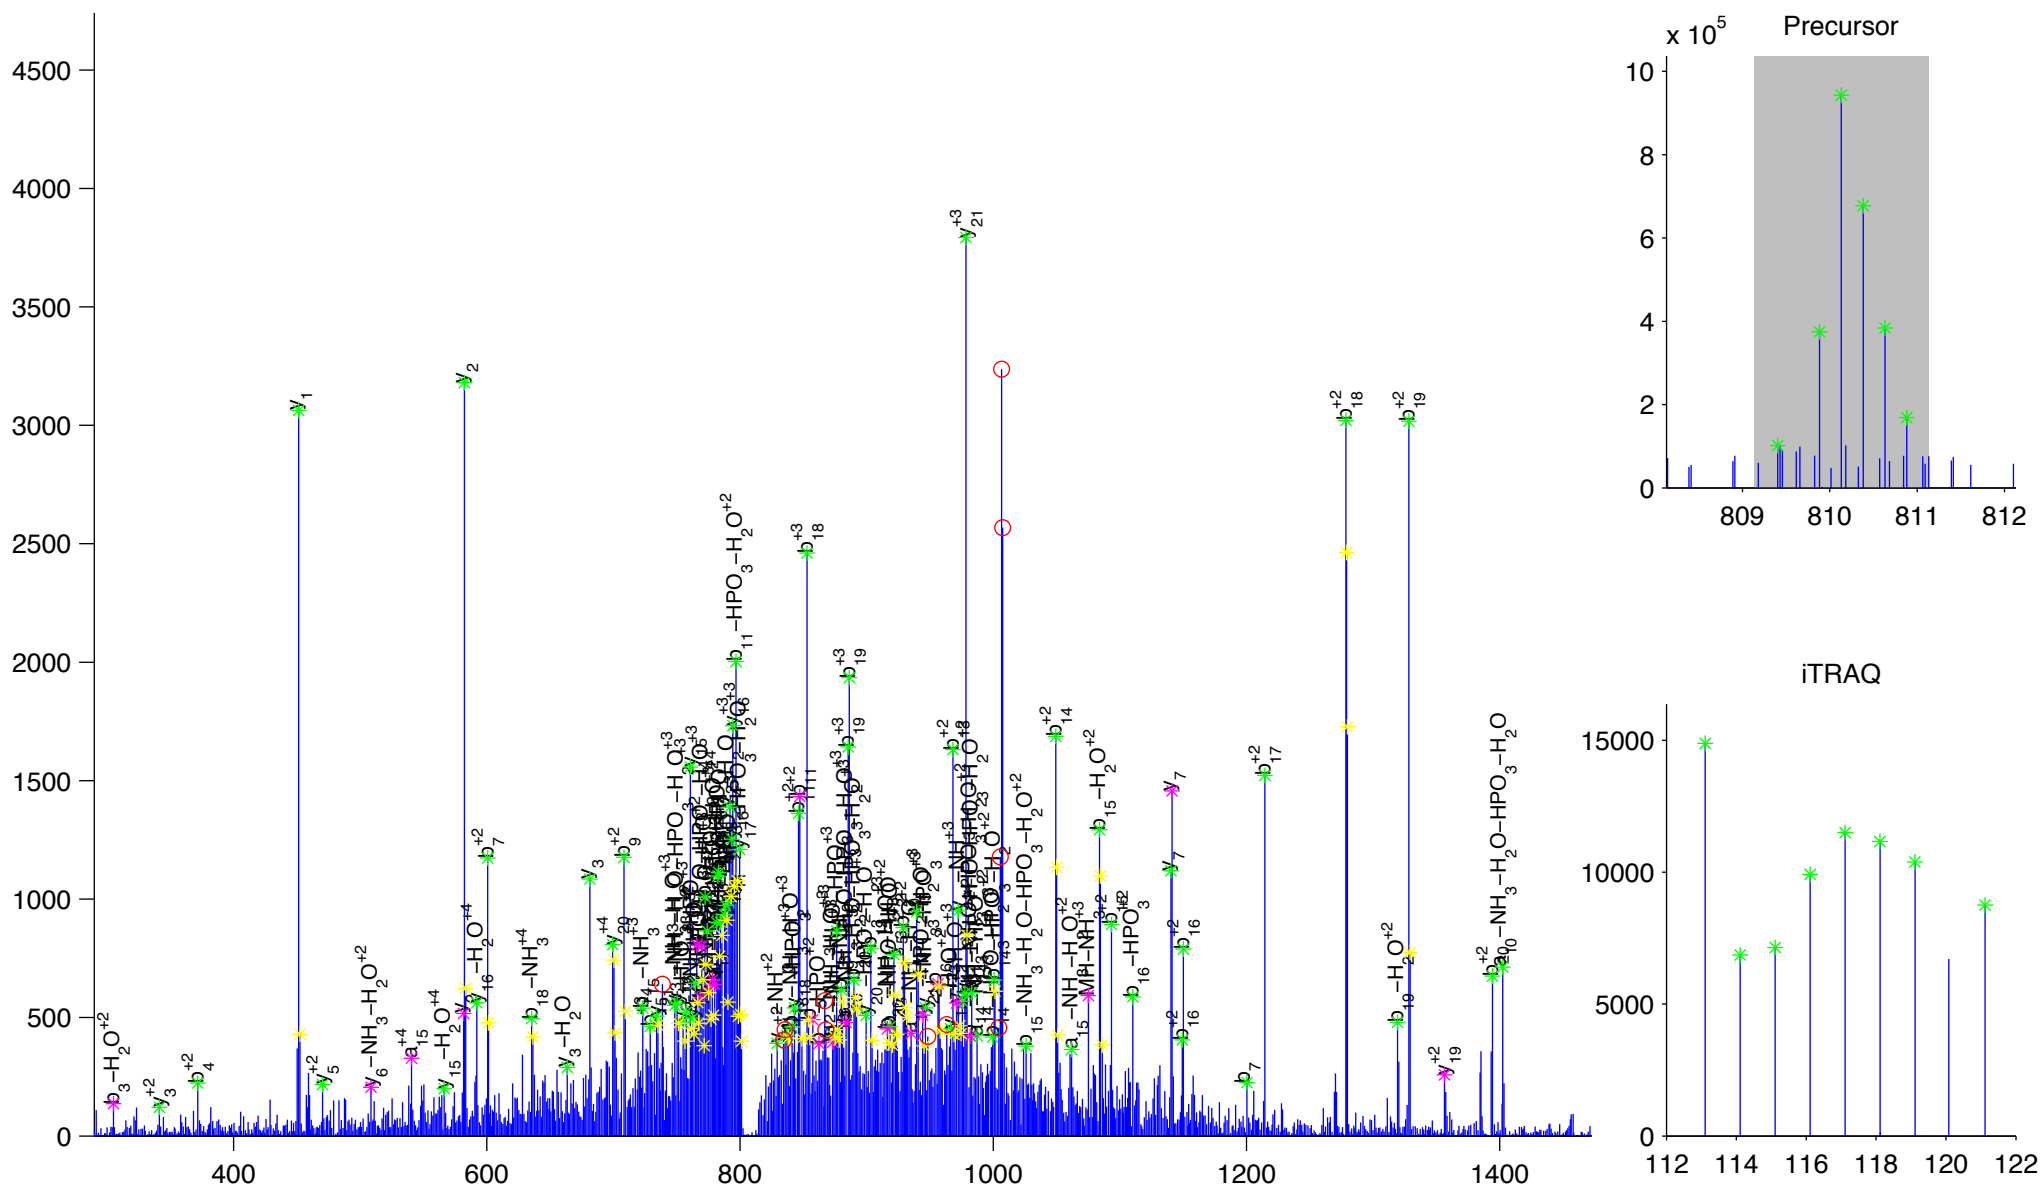

V [ P ] I [ V ] I [ N ] P [ N ] A [ y ] D [ N ] L [ A ] I [ Y ] K

Sugen kinase 269 / hypothetical protein LOC244895

Charge State: +4

Scan Number: 3788

File Name: HJ072909\_HFD\_E1\_2.raw

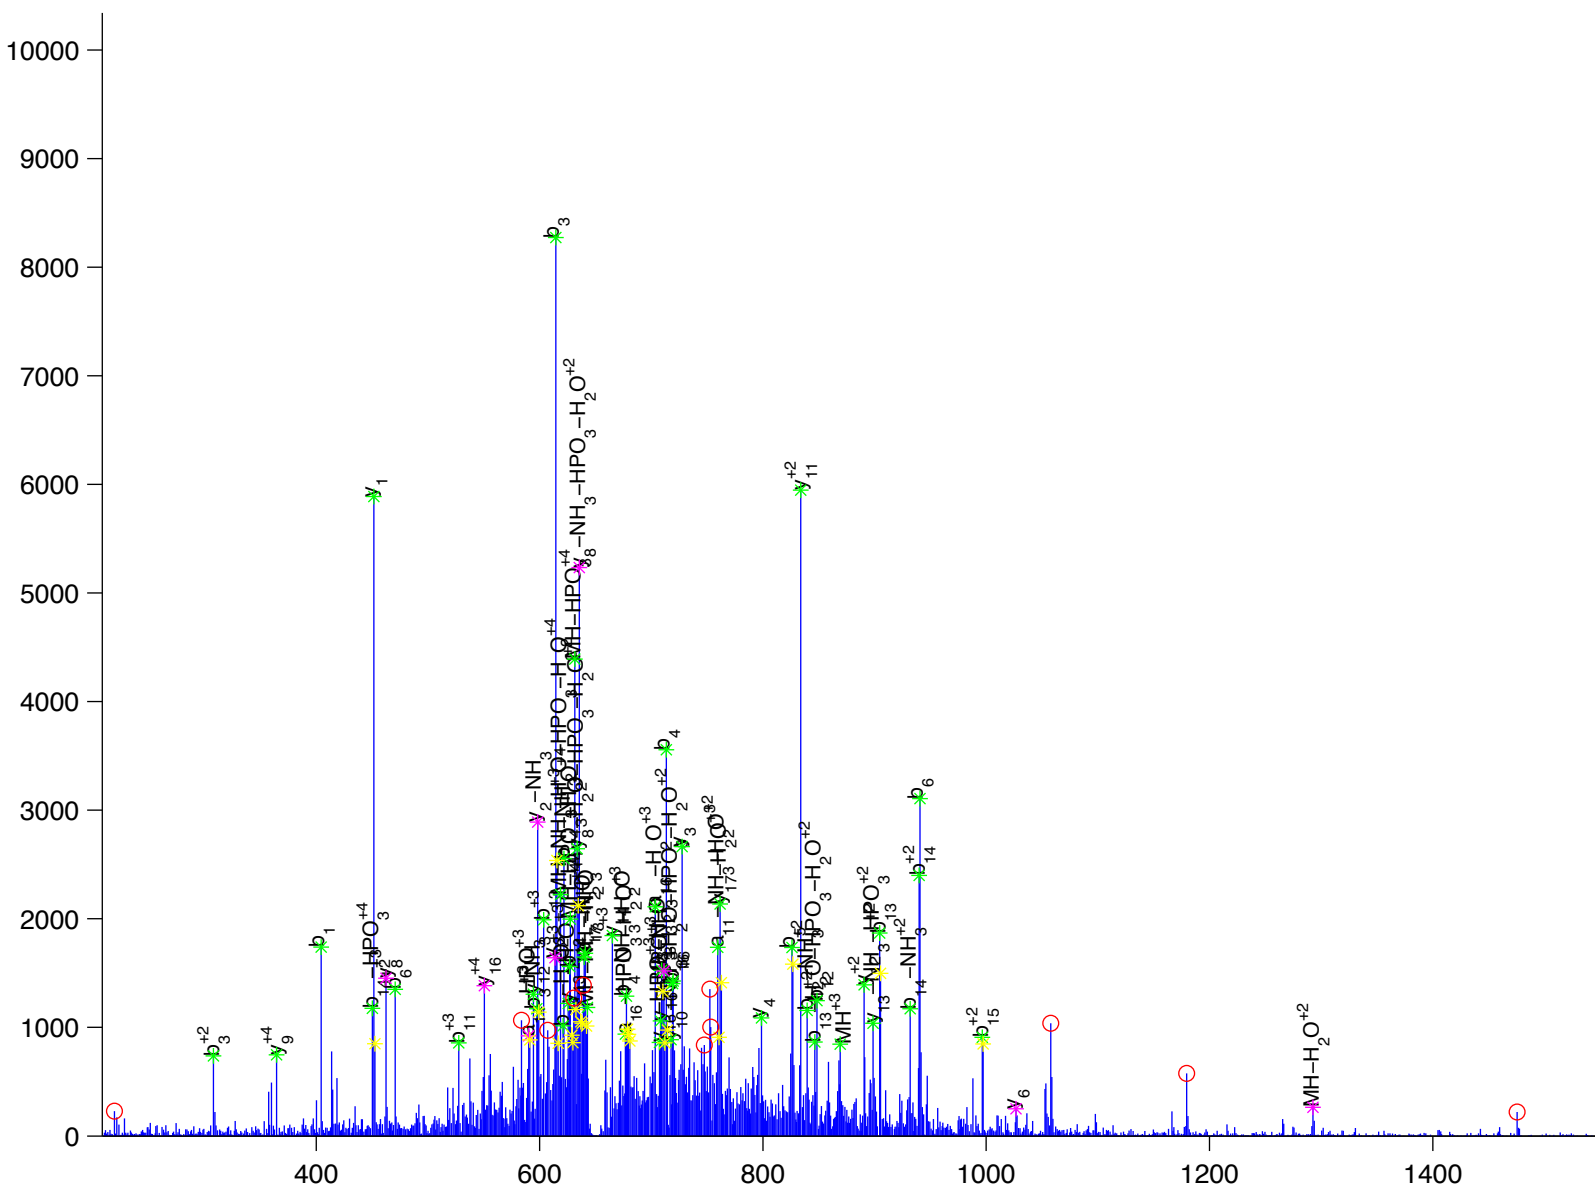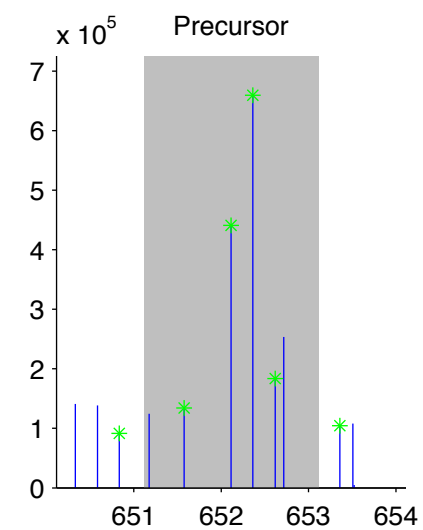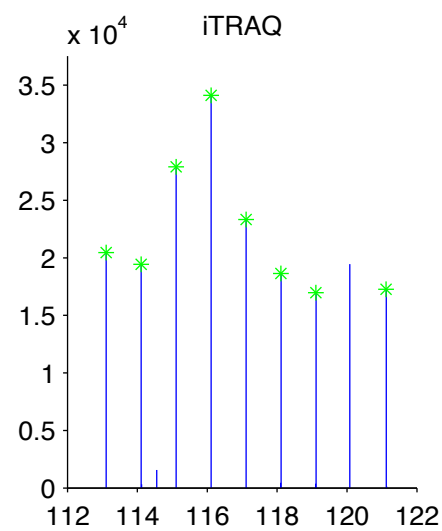

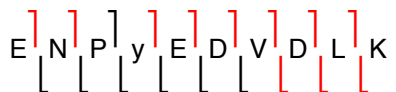

suppression of tumorigenicity 5 isoform 1

Charge State: +3

Scan Number: 4811

File Name: 091130ptp1blivers\_hfd\_basal2.raw

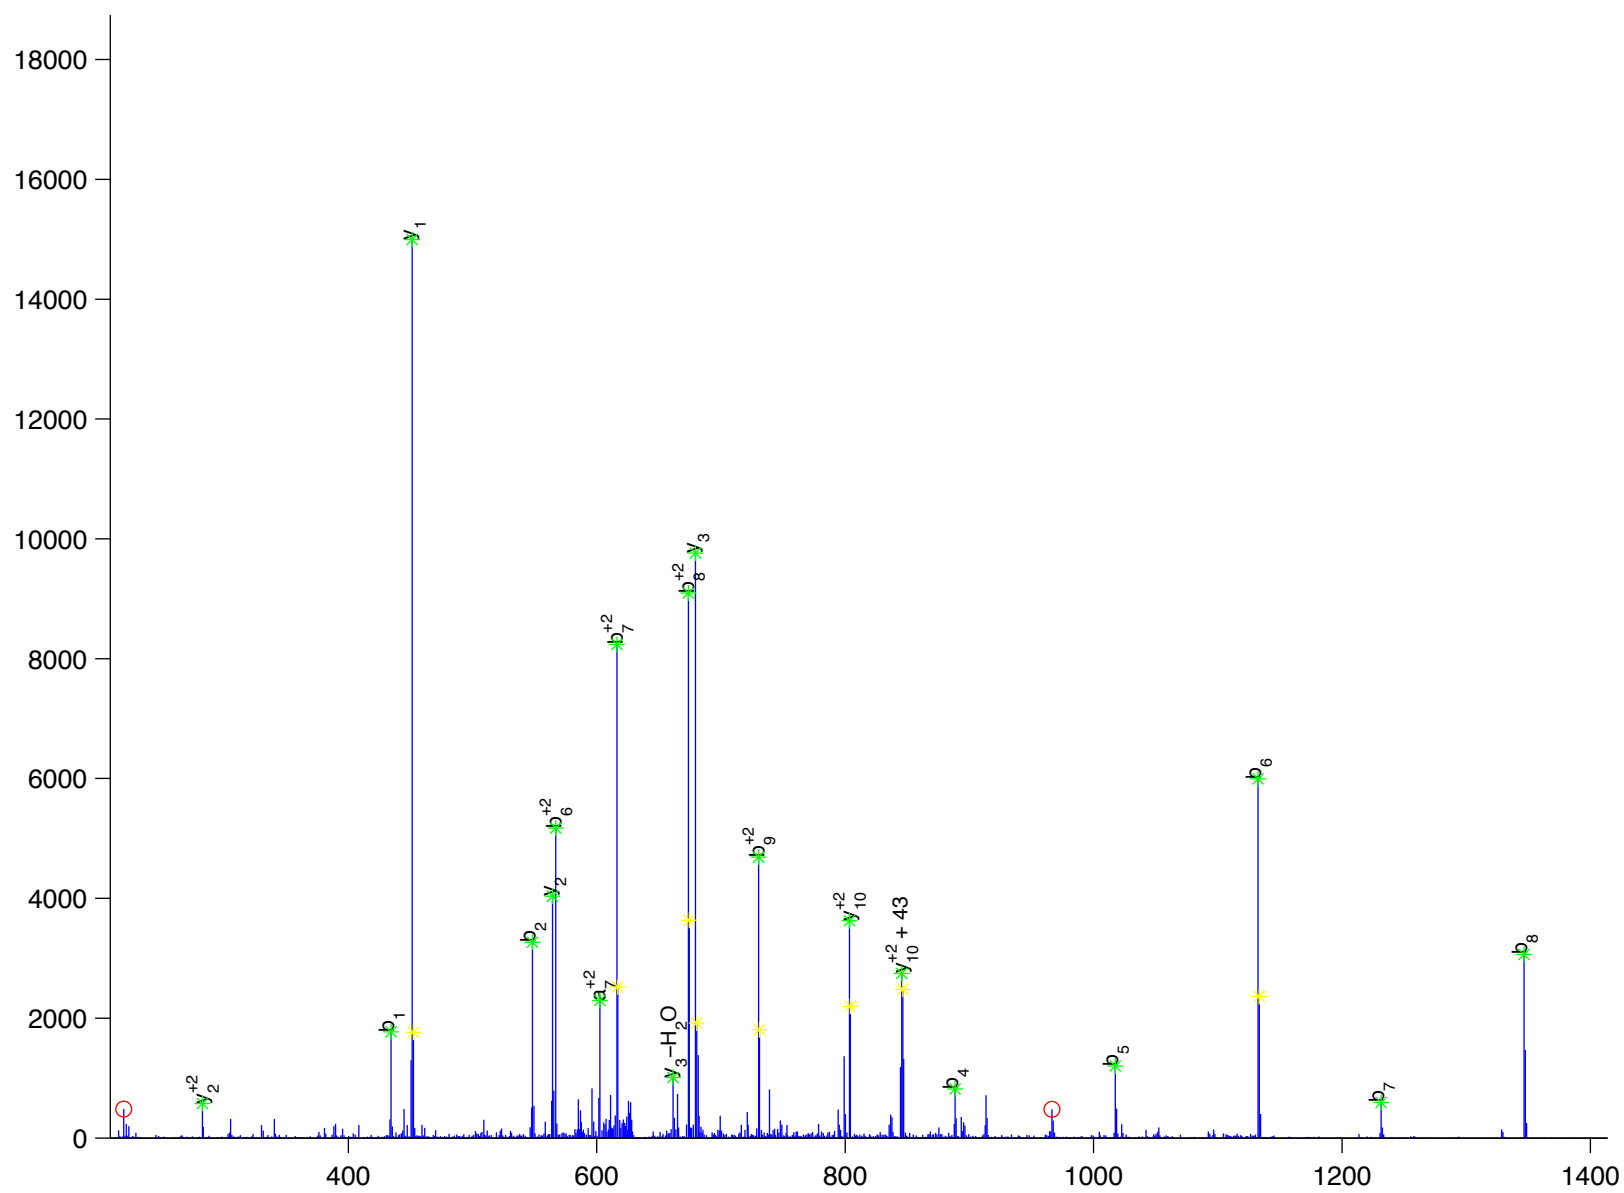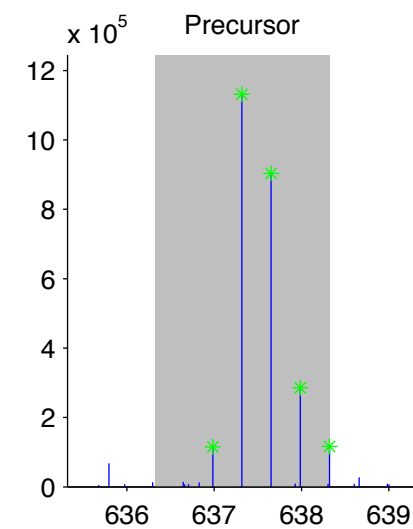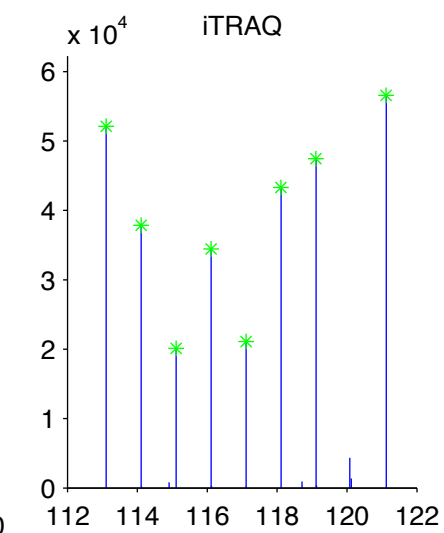

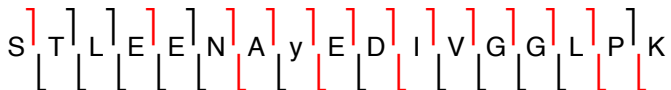

suppression of tumorigenicity 5 isoform 1

Charge State: +4

Scan Number: 5475

File Name: 100908ptp1blivers\_ncHFD3\_basal.raw

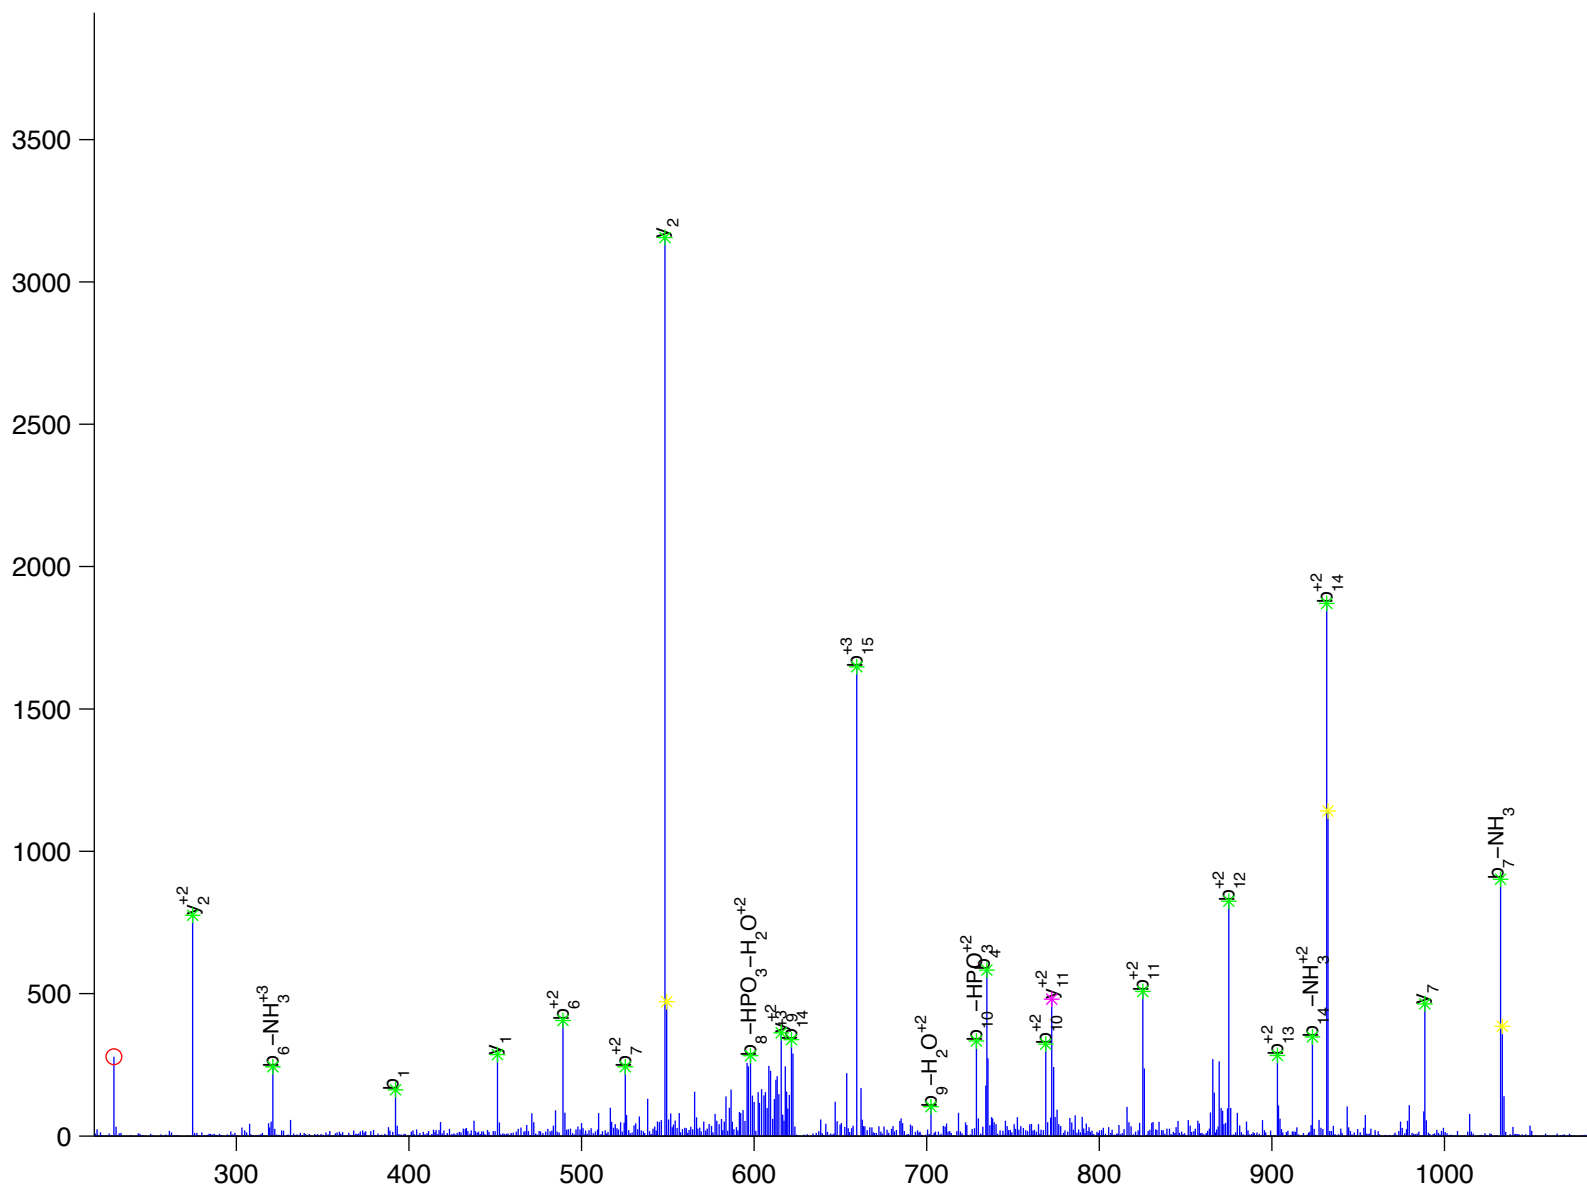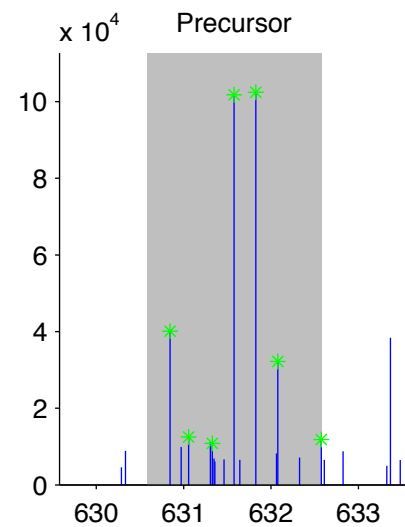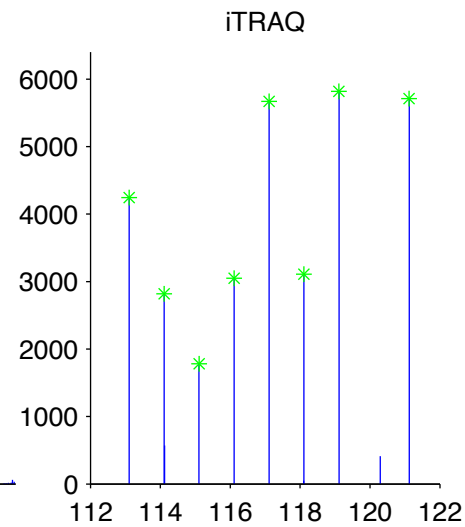



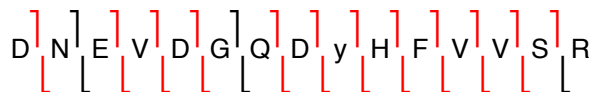

synapse-associated protein 102

Charge State: +3

Scan Number: 4135

File Name: 090806ptp1blivers\_M\_NC2.raw

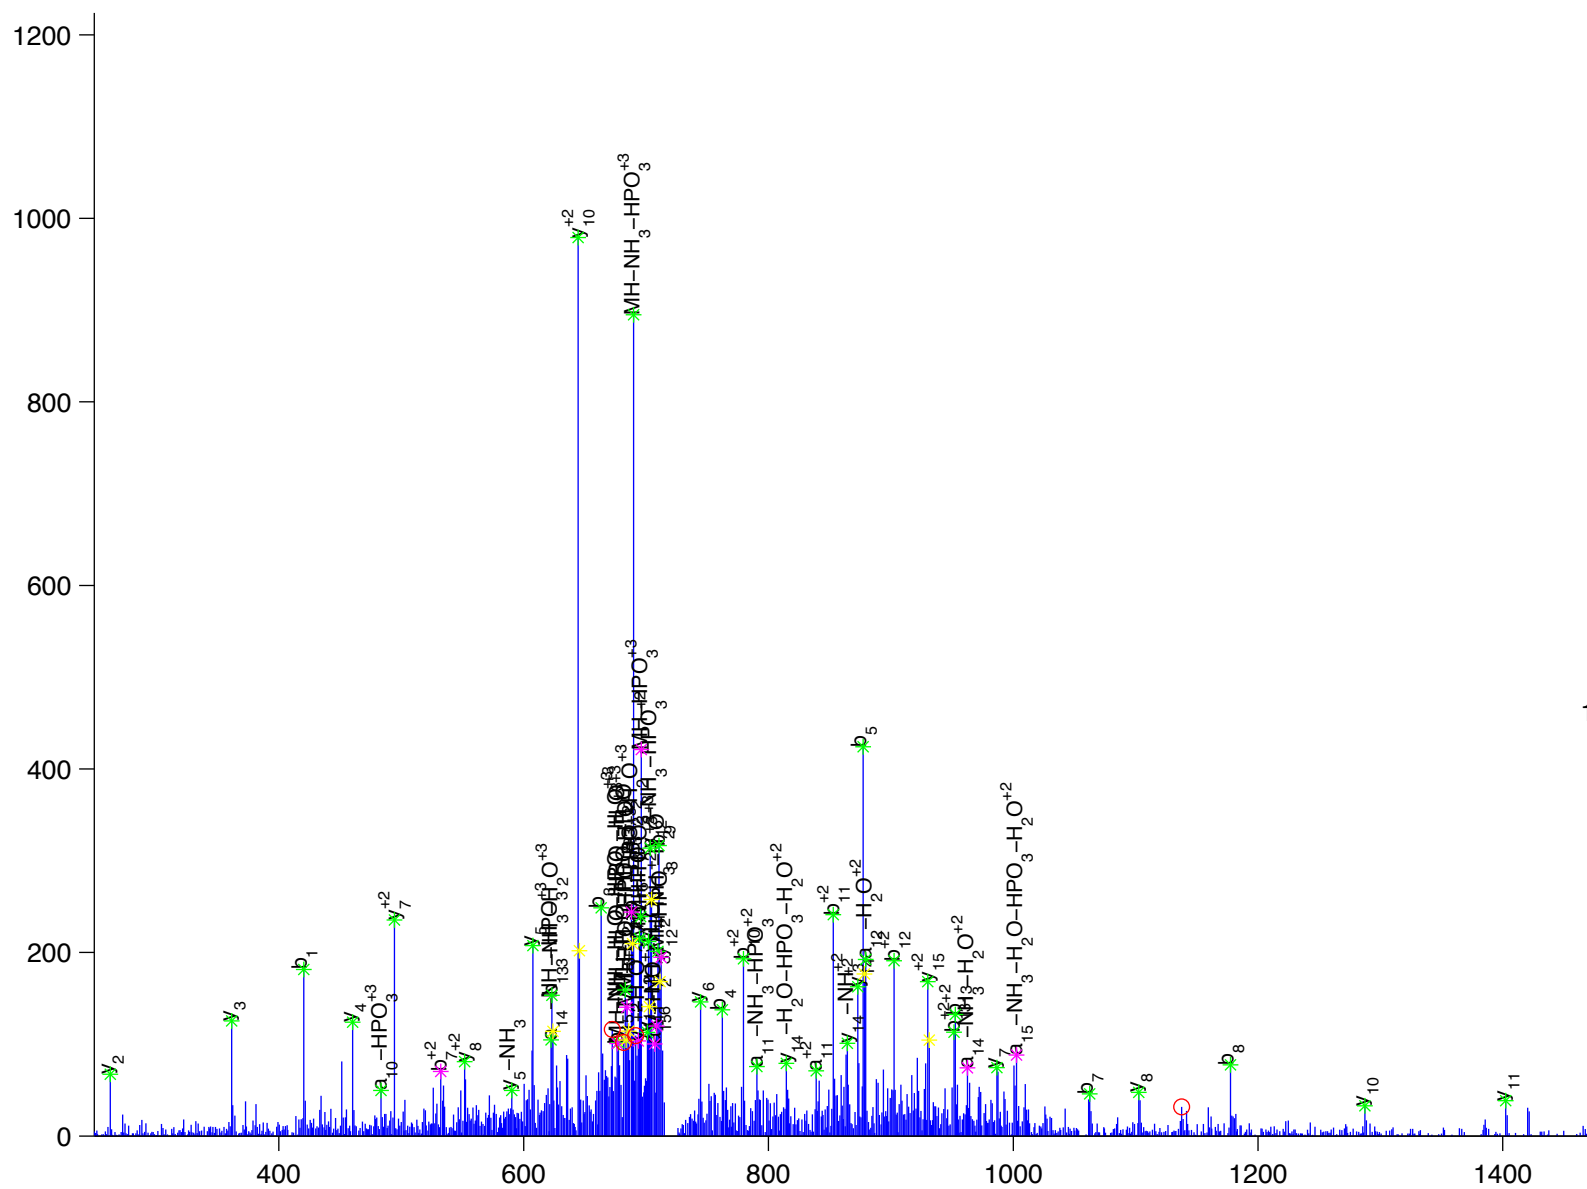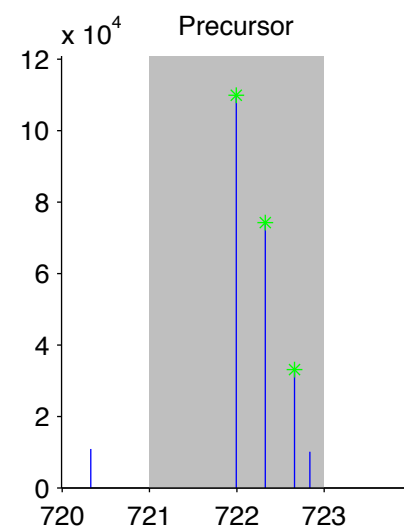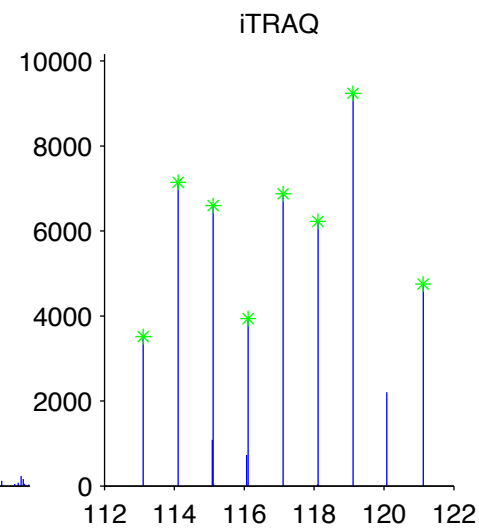

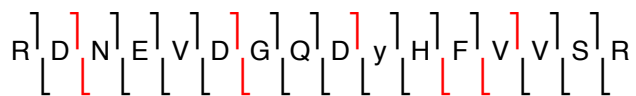

synapse-associated protein 102

Charge State: +3

Scan Number: 4296

File Name: 091130ptp1blivers\_hfd\_basal2.raw

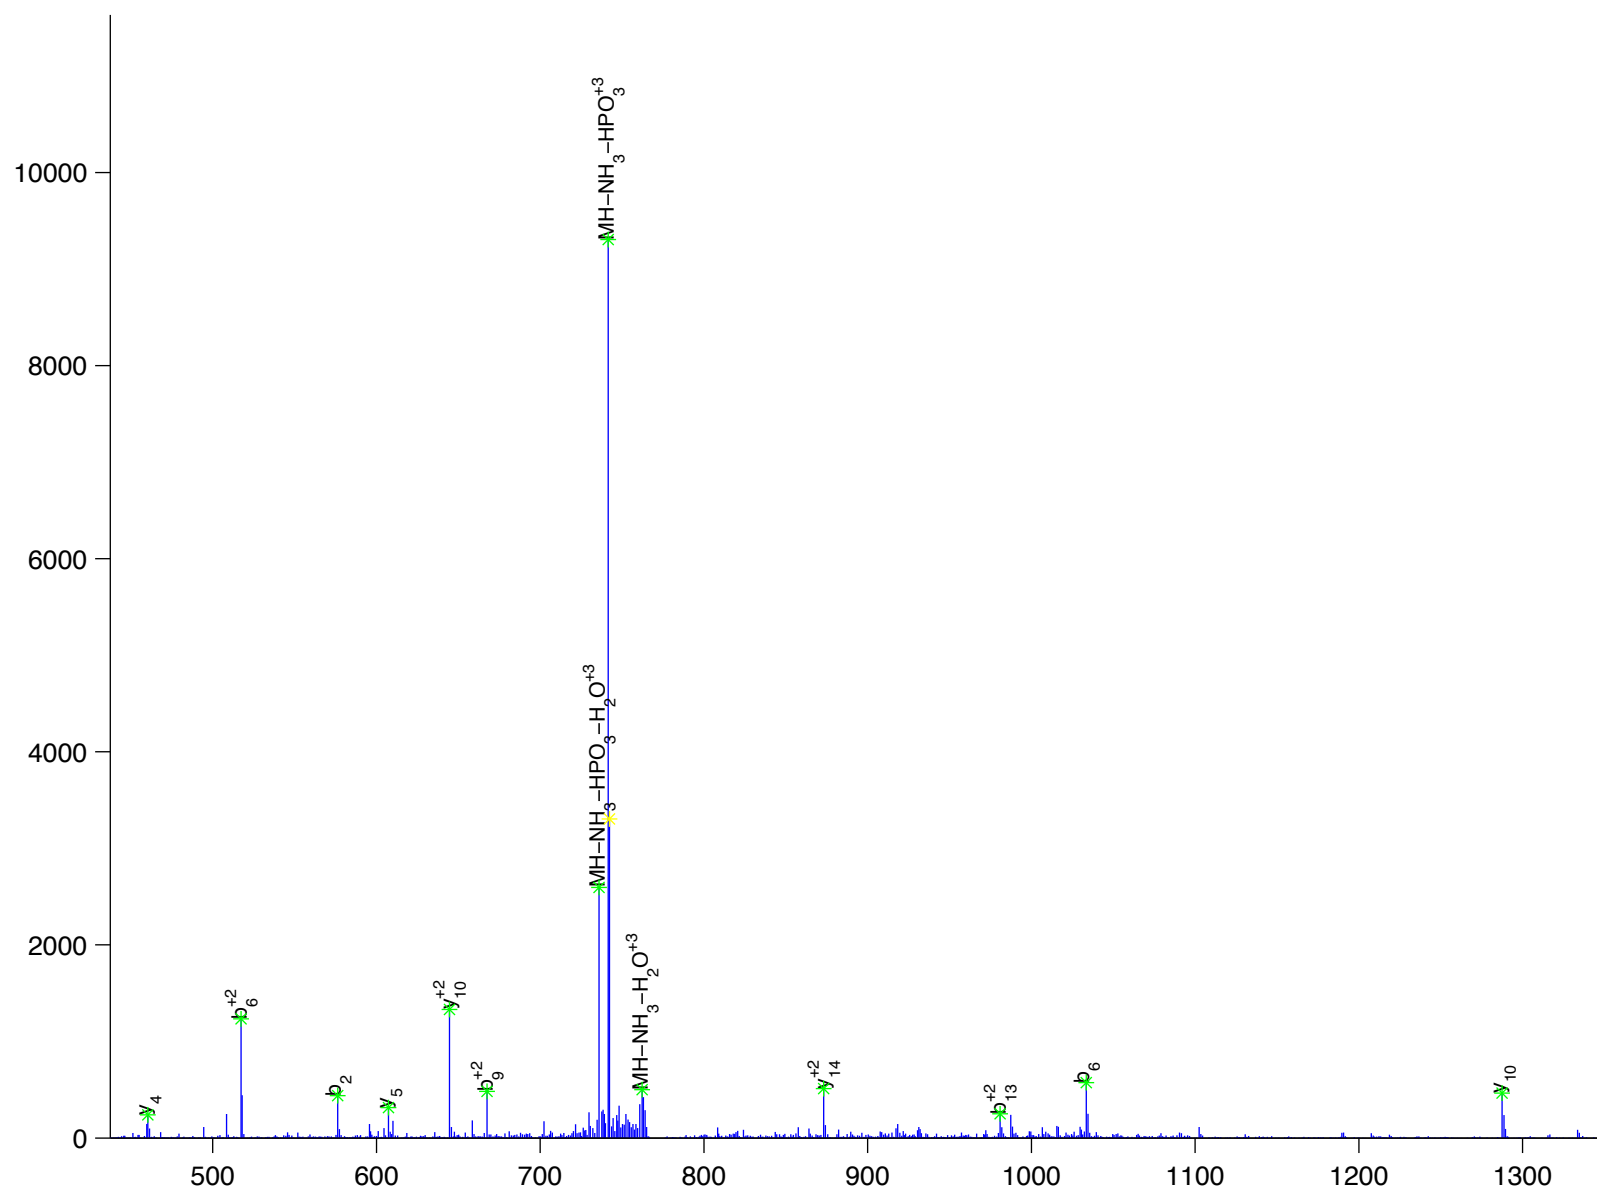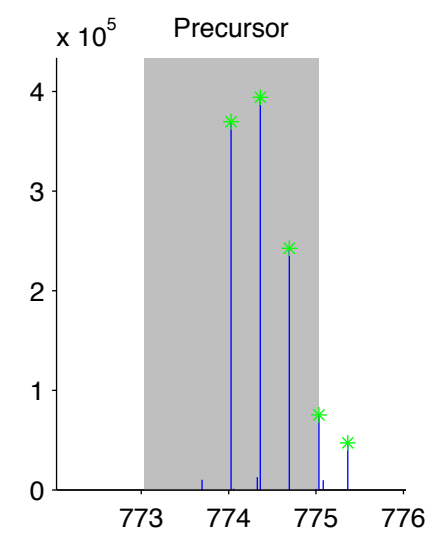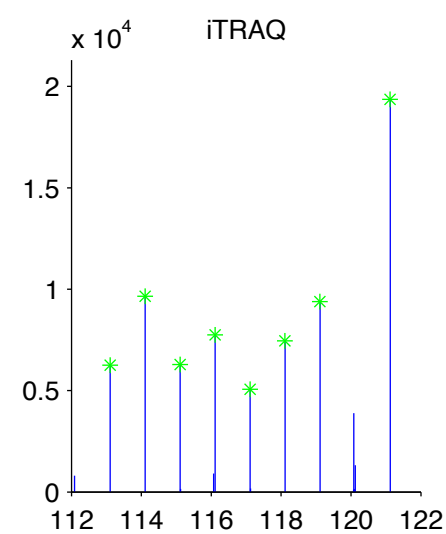

T M Q F E P S T M V y D A C R

taln 1  
Charge State: +3  
Scan Number: 2385  
File Name: HJ072909\_HFD\_E1\_2.raw

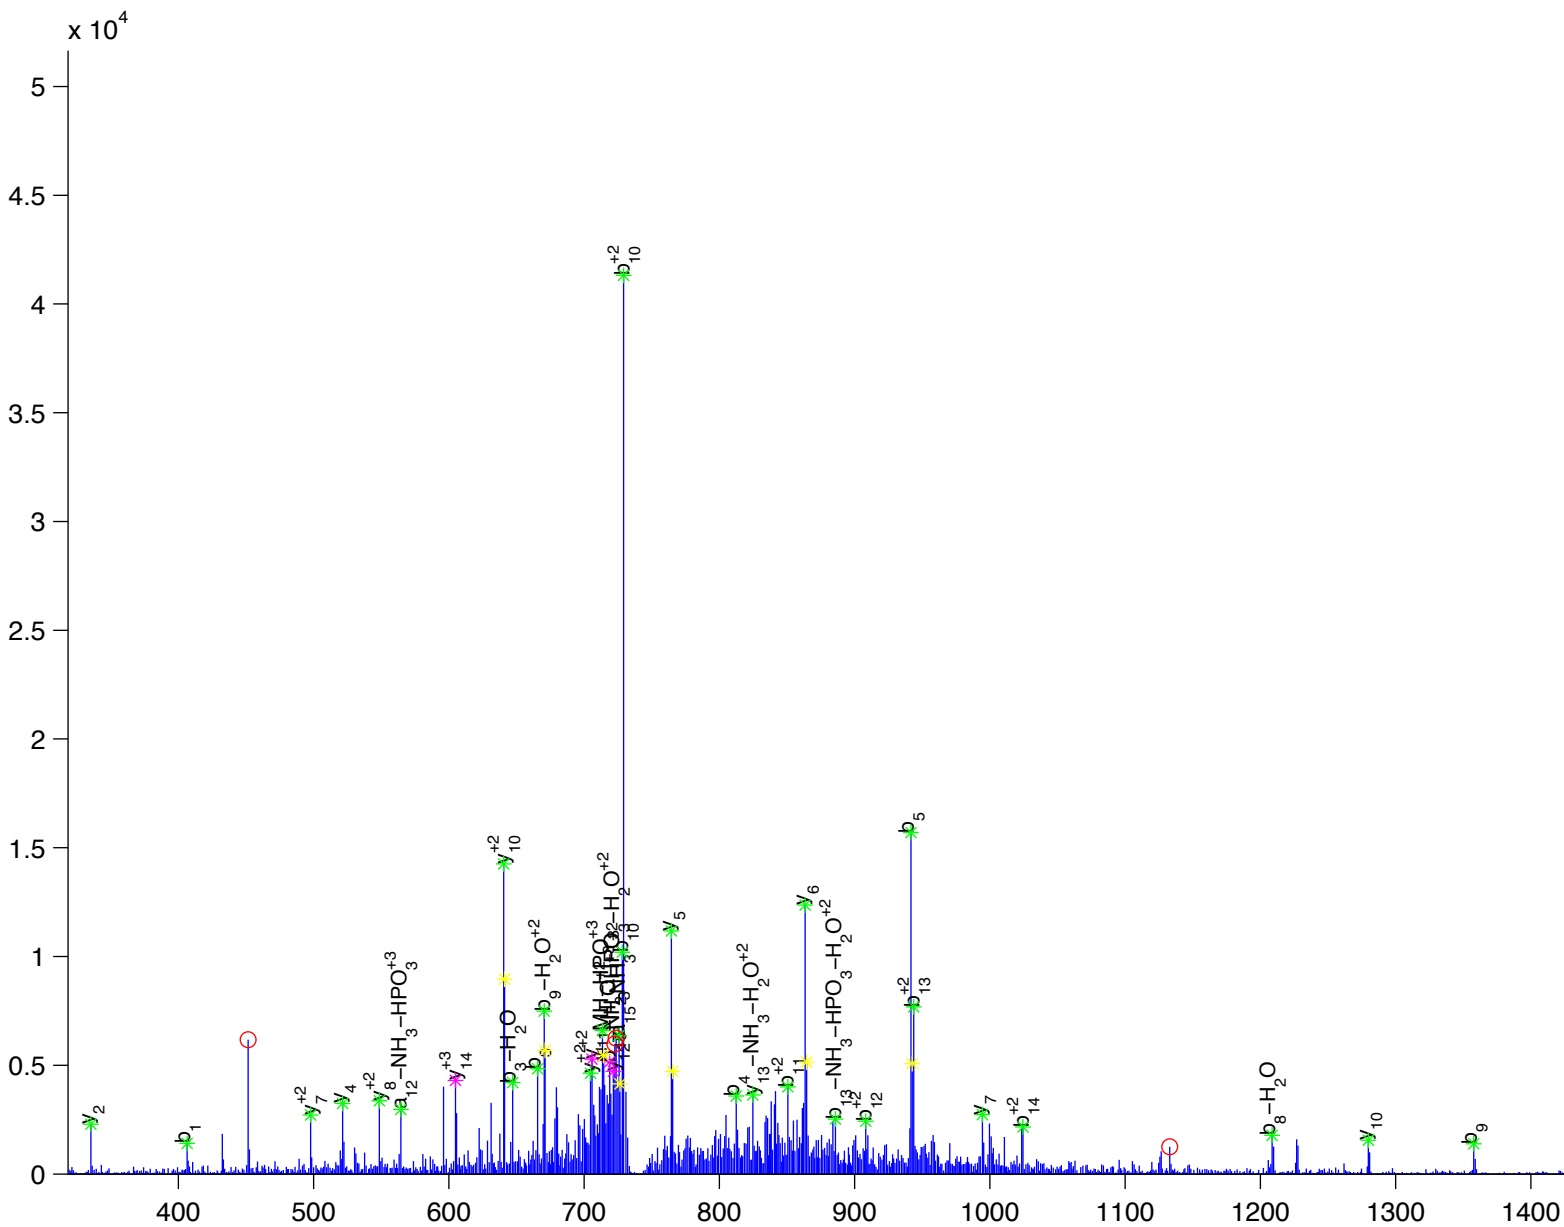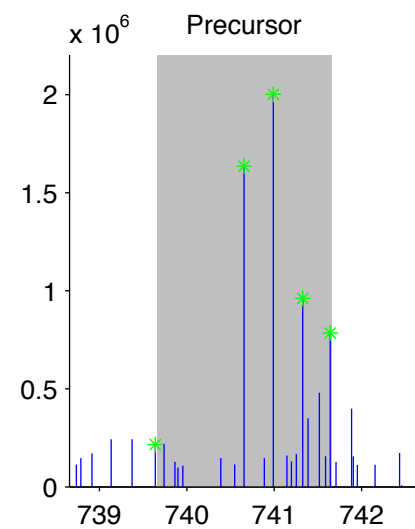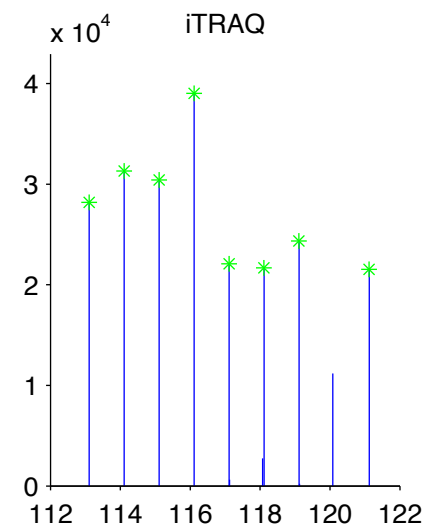

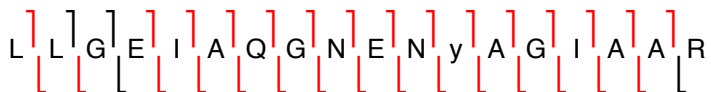

taln 1

Charge State: +3

Scan Number: 6064

File Name: 100905ptp1blivers\_ncHFD\_basal.raw

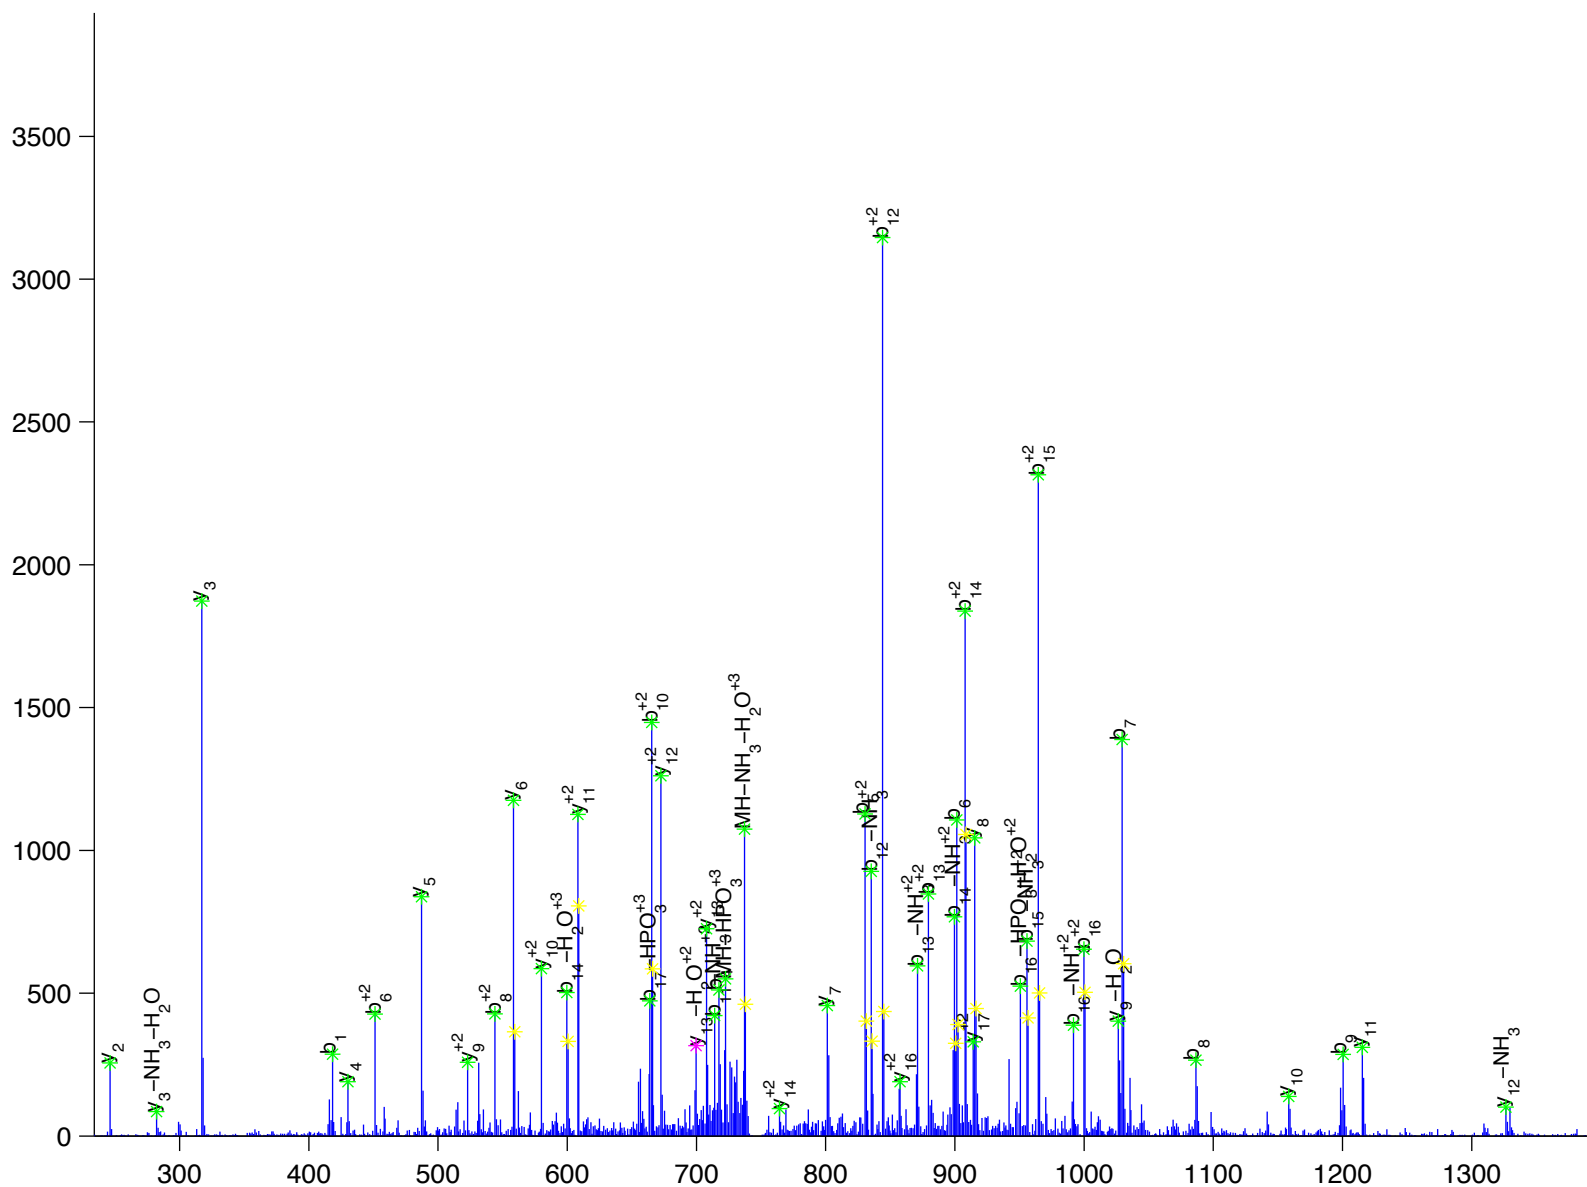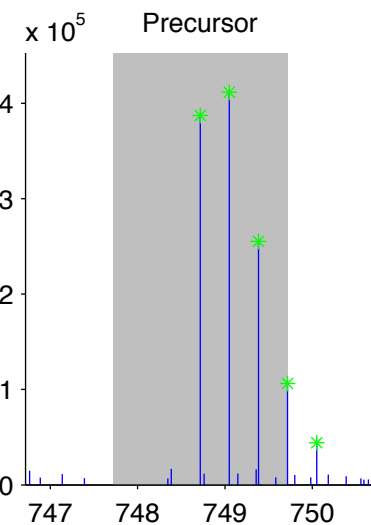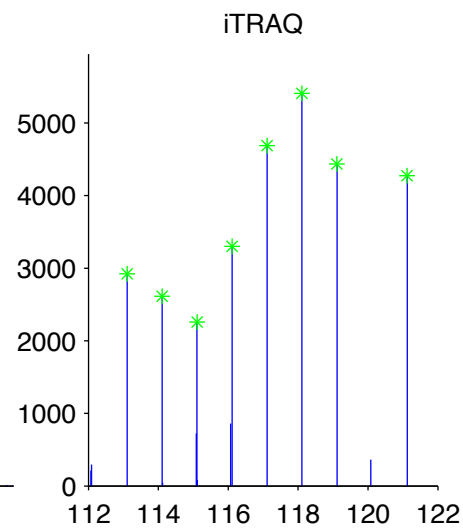

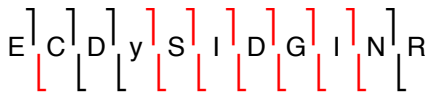

taln 2

Charge State: +3

Scan Number: 3432

File Name: 100908ptp1blivers\_ncHFD3\_basal.raw

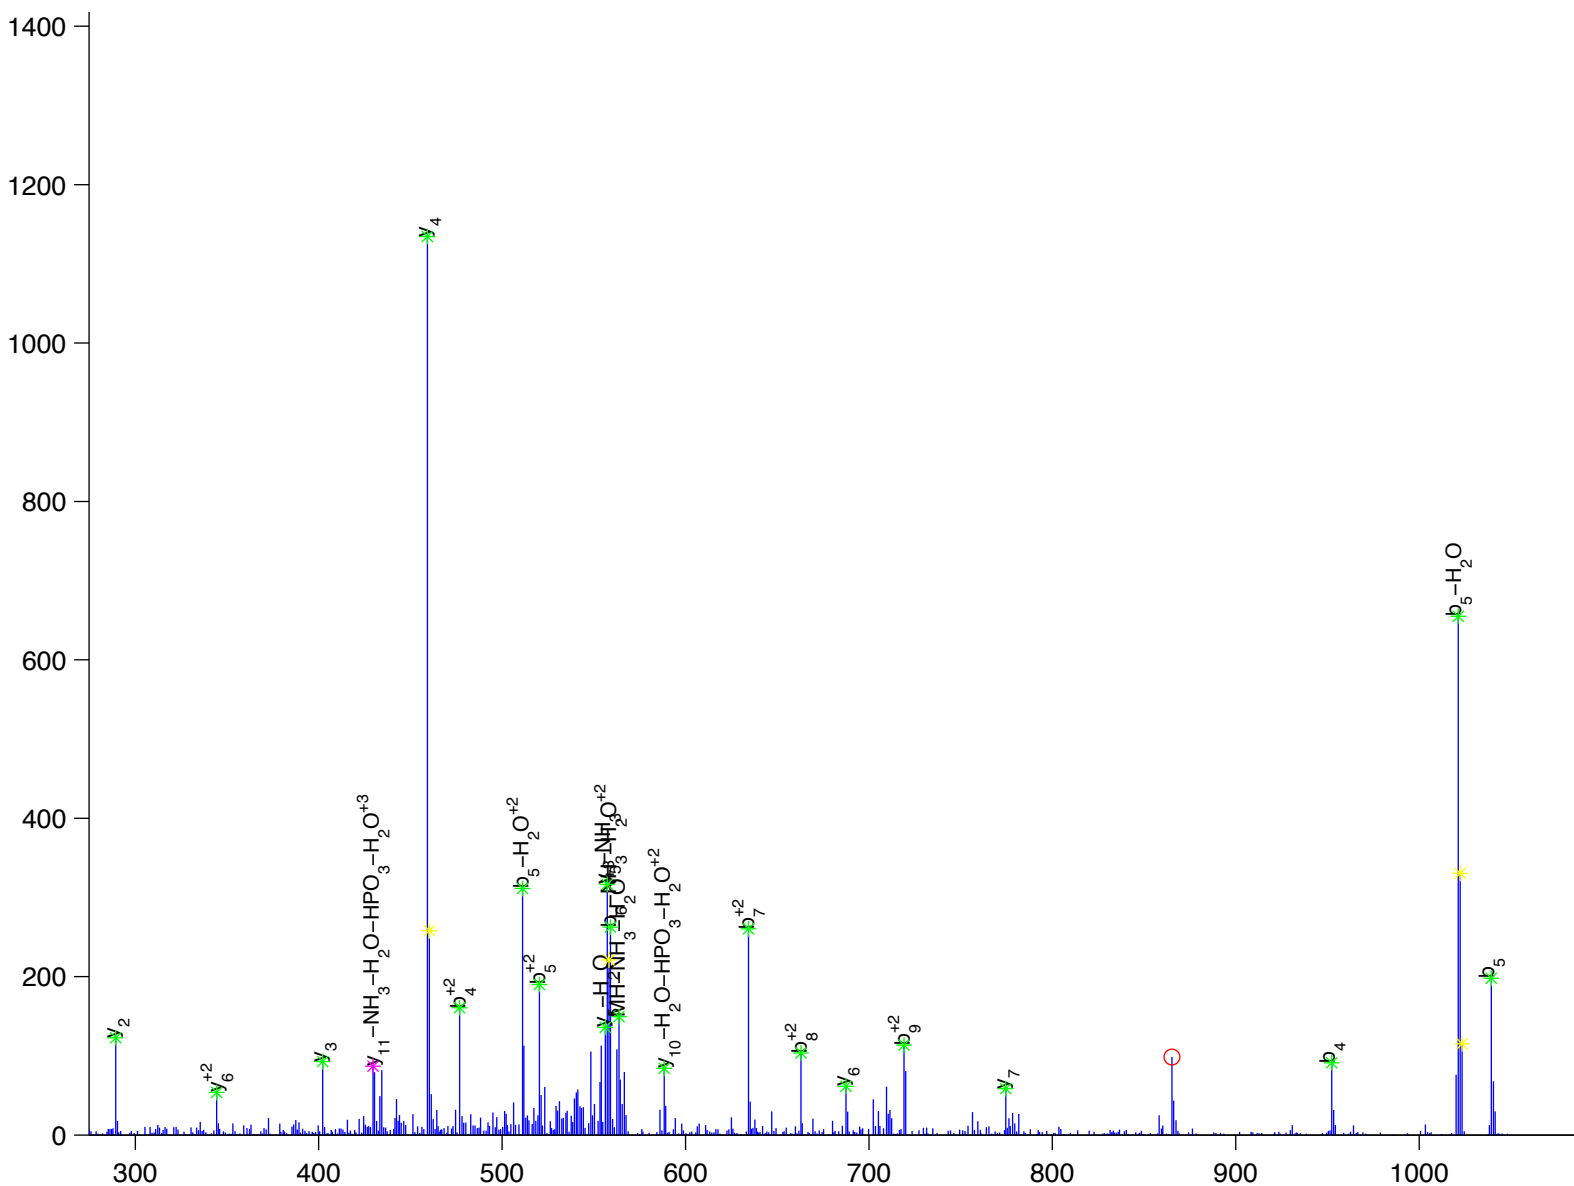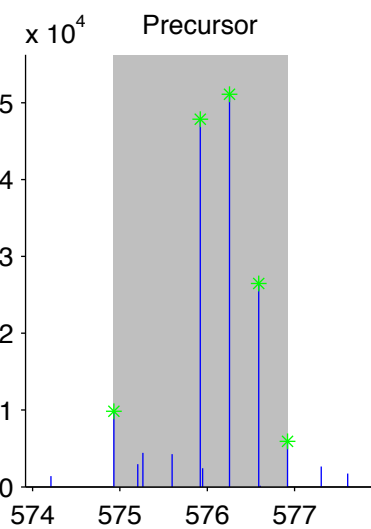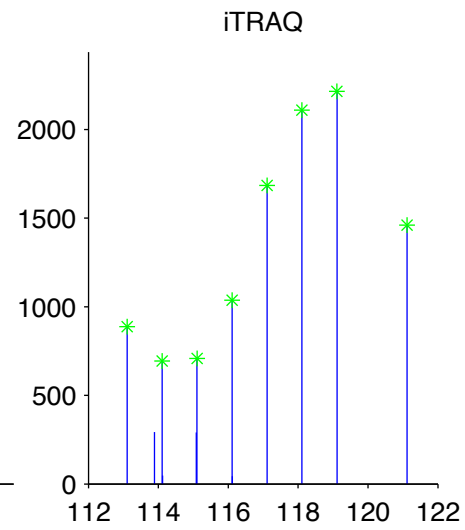

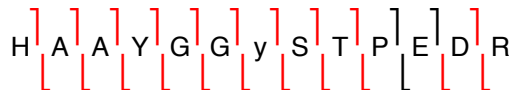

tensin 1

Charge State: +3

Scan Number: 3278

File Name: 091130ptp1blivers\_hfd\_basal2.raw

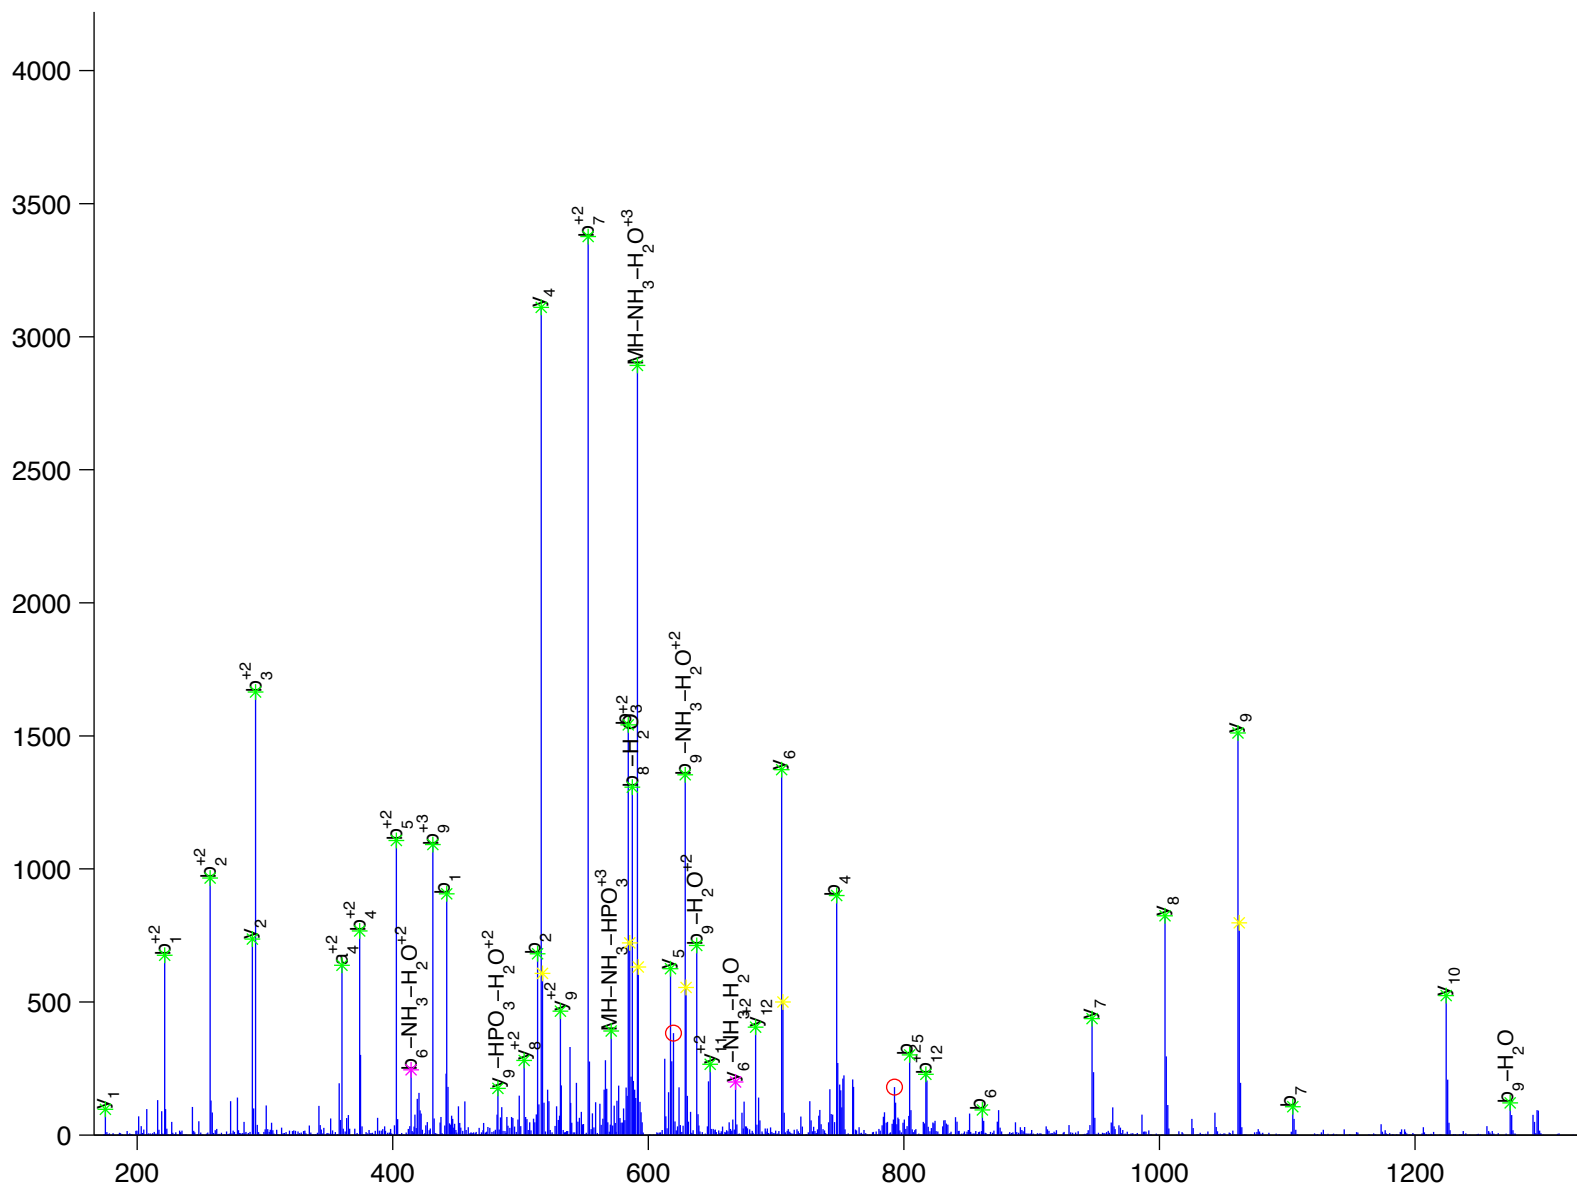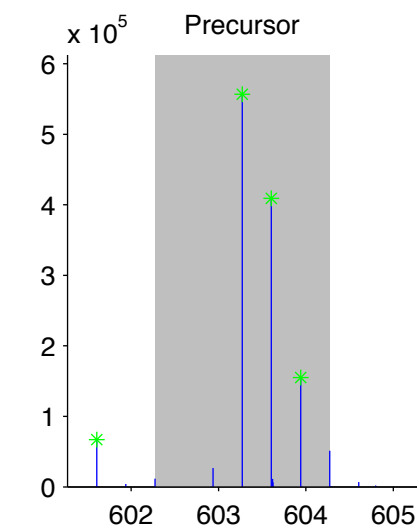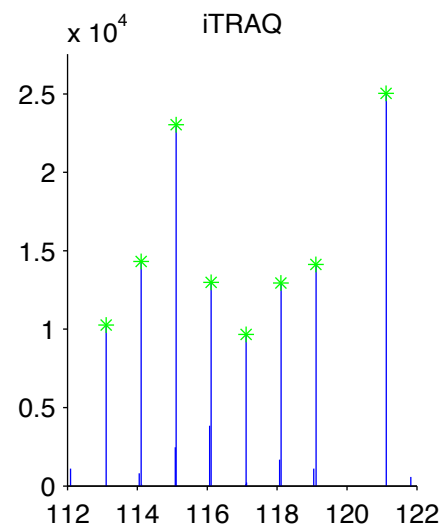

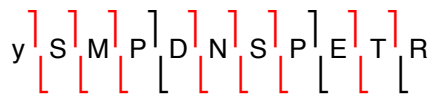

tensin 1

Charge State: +2

Scan Number: 3912

File Name: 091130ptp1blivers\_hfd\_basal2.raw

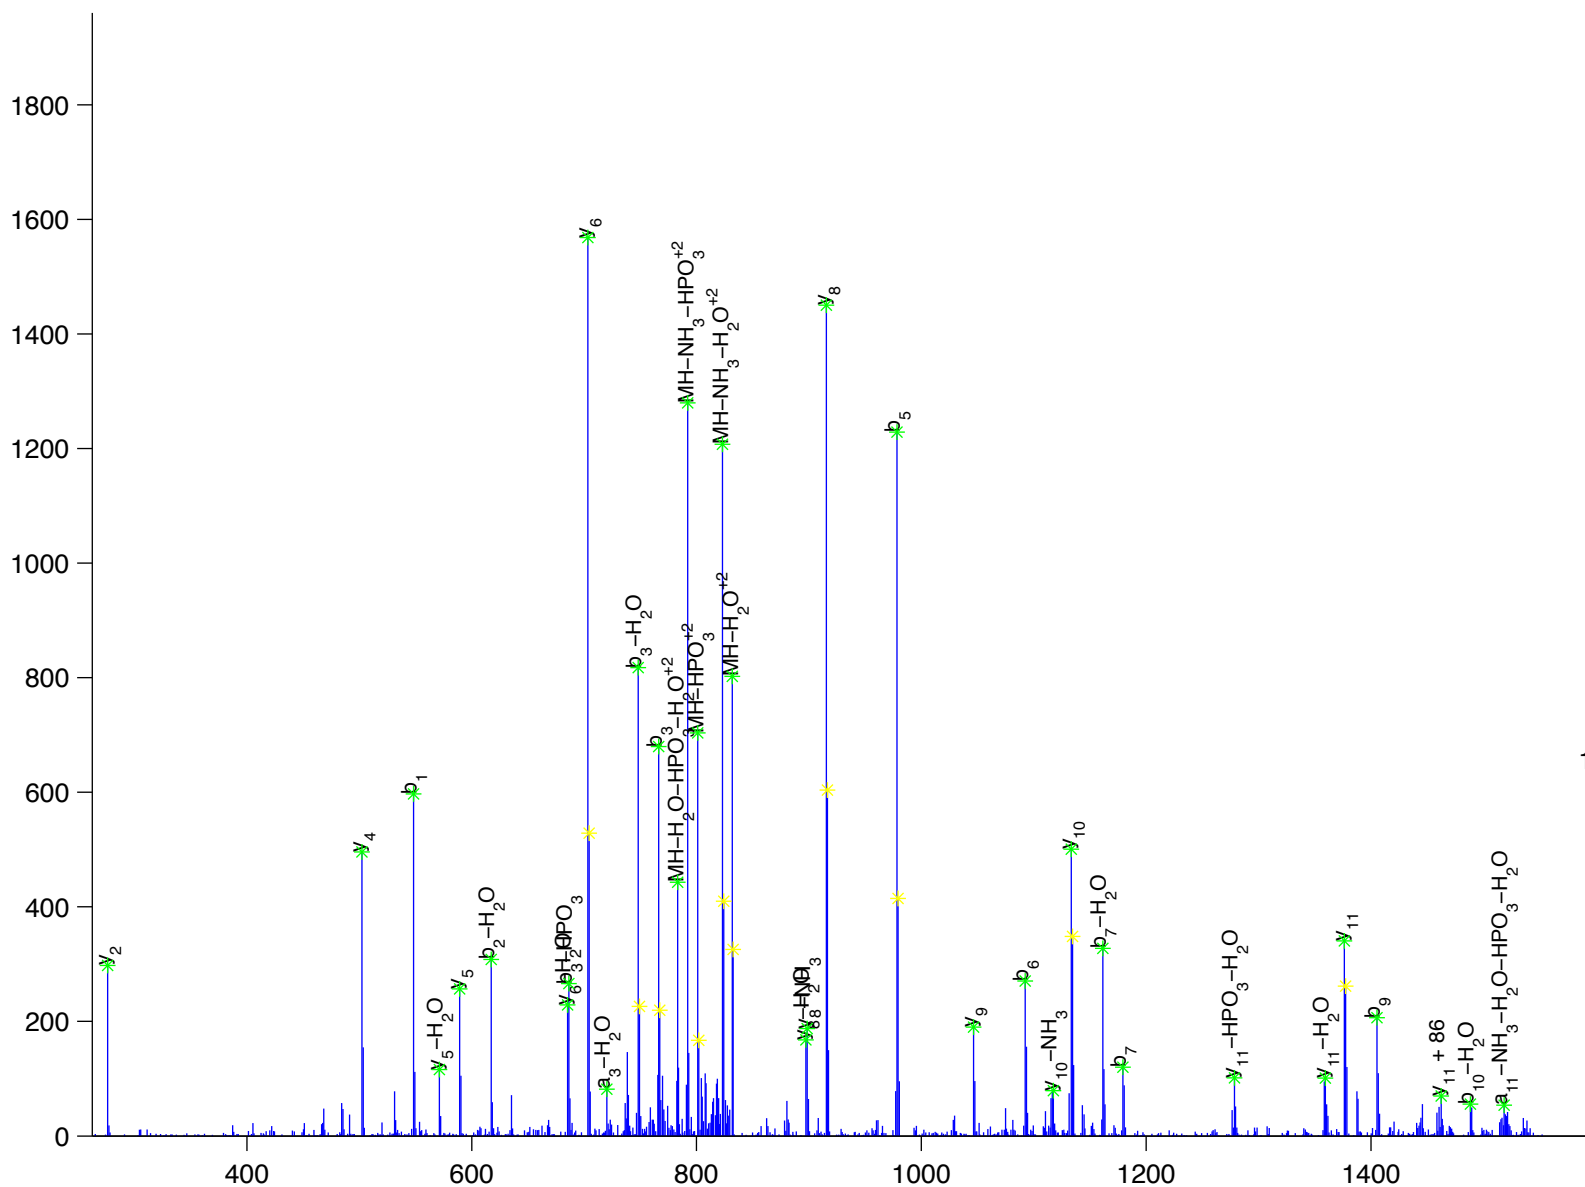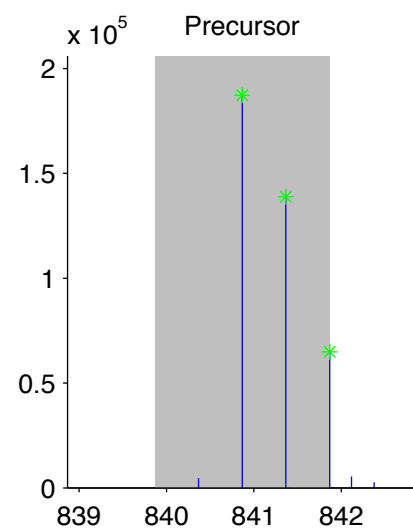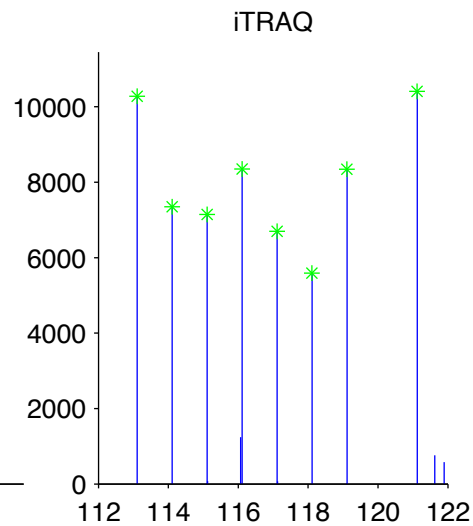

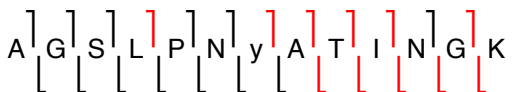

tensin 1  
Charge State: +3  
Scan Number: 5002  
File Name: 091130ptp1blivers\_hfd\_basal2.raw

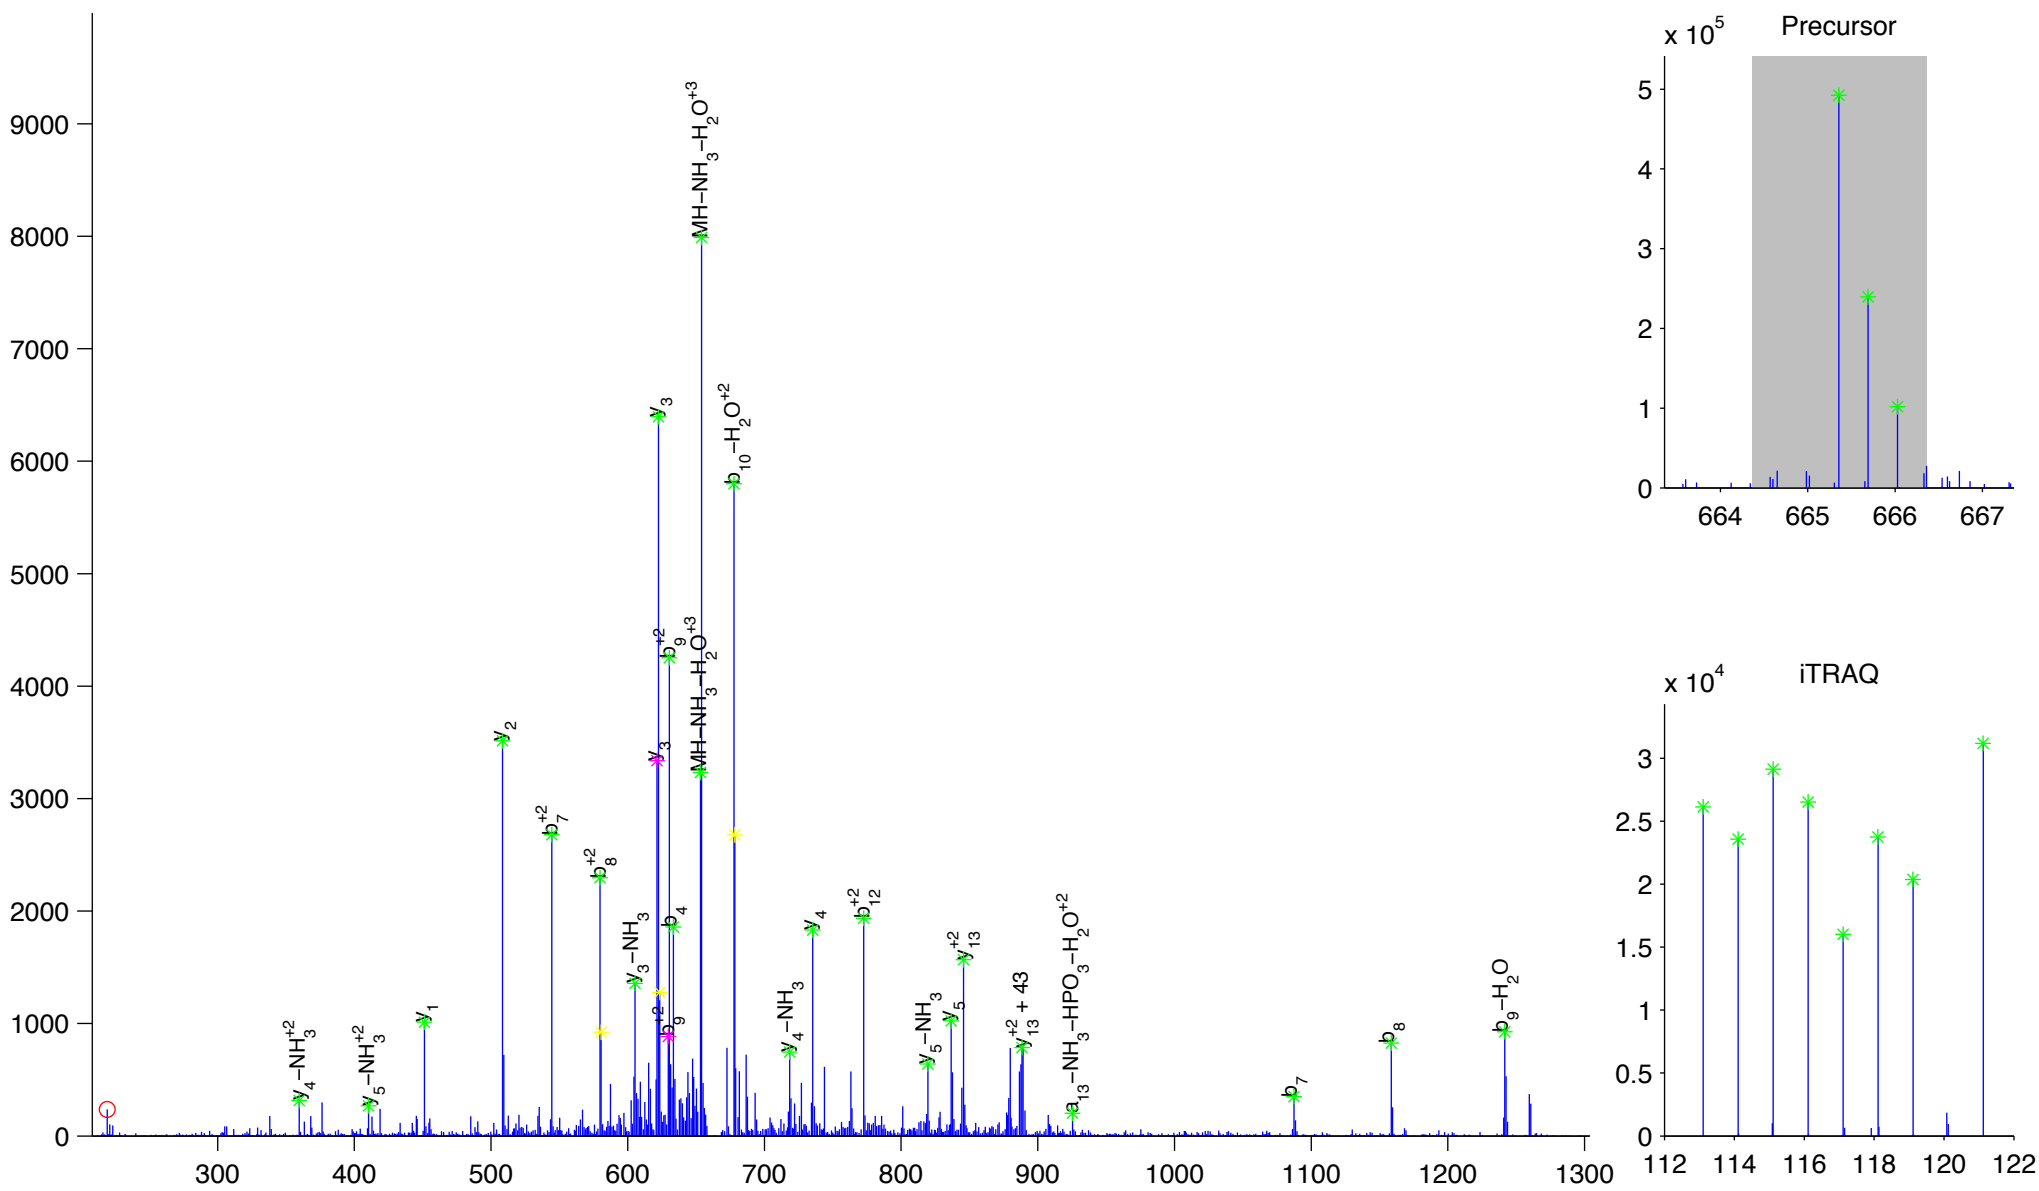



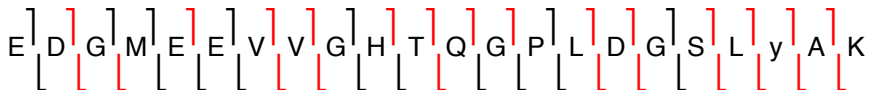

tensin 1  
 Charge State: +3  
 Scan Number: 6344  
 File Name: 091130ptp1blivers\_hfd\_basal2.raw

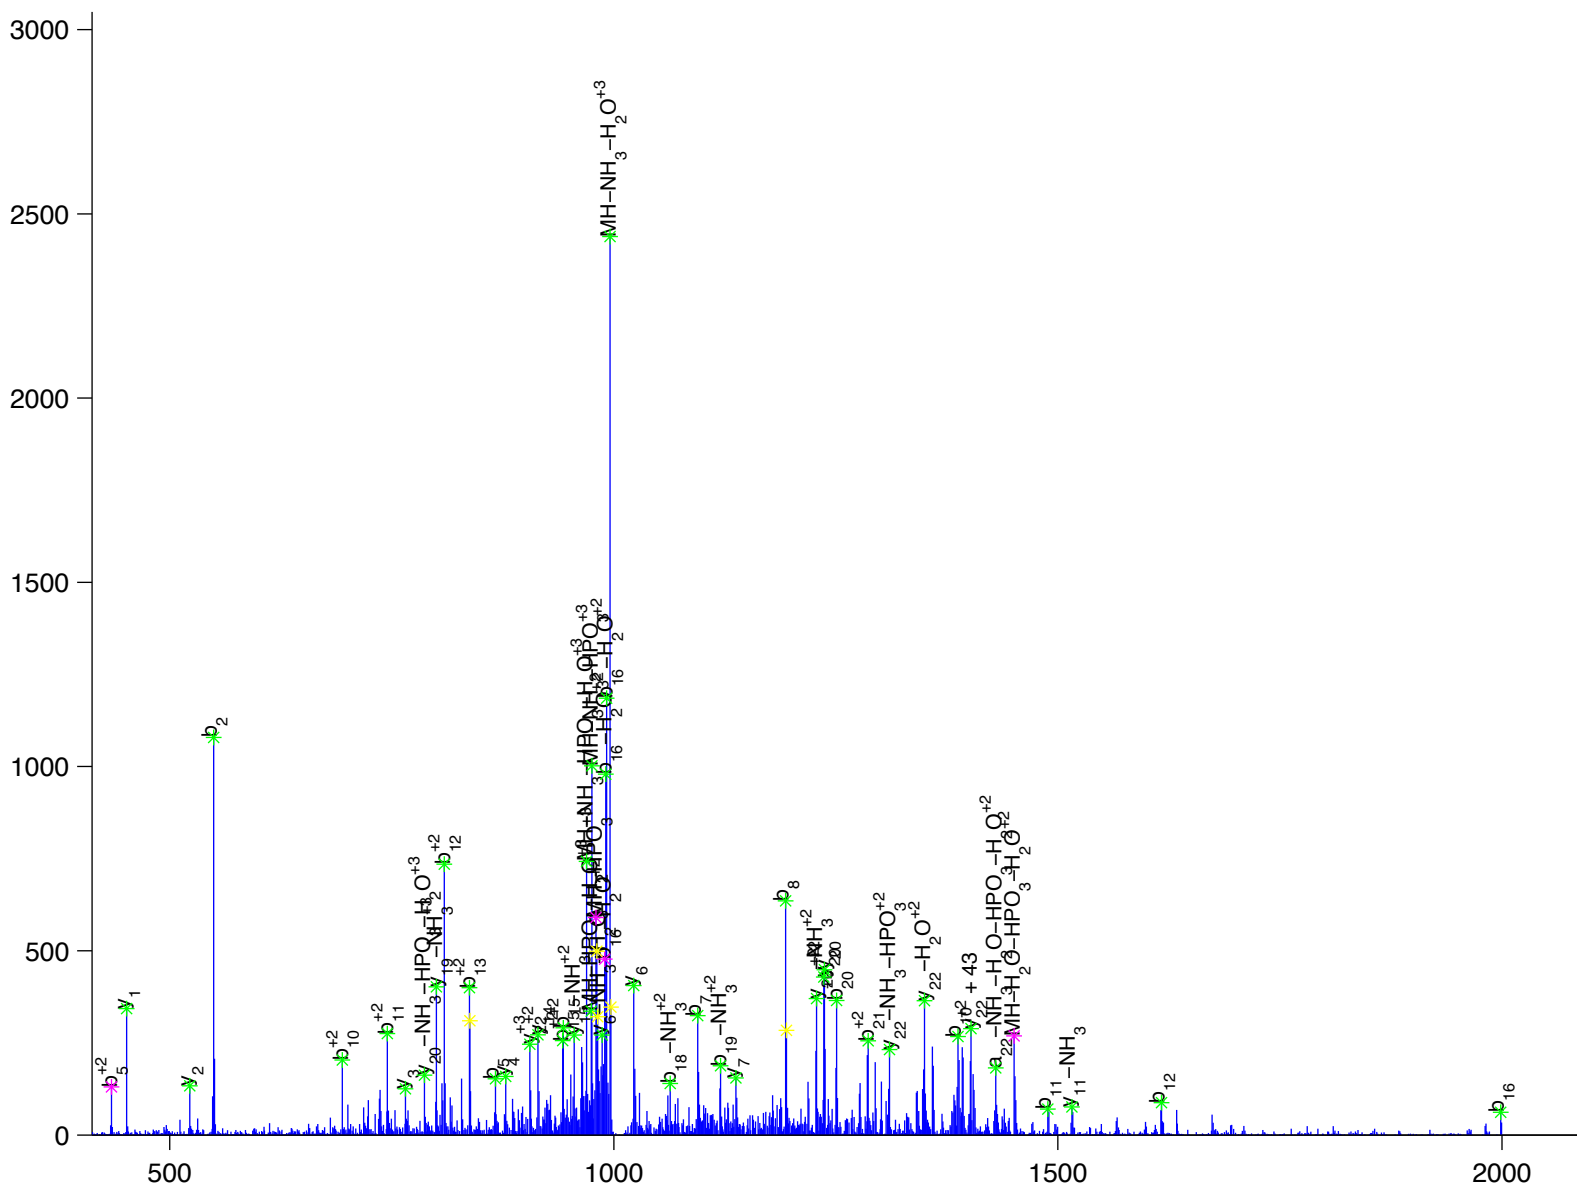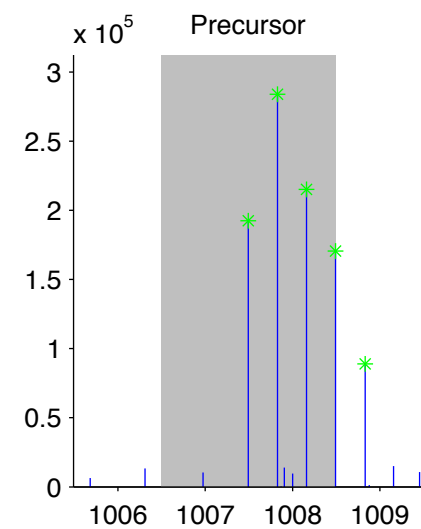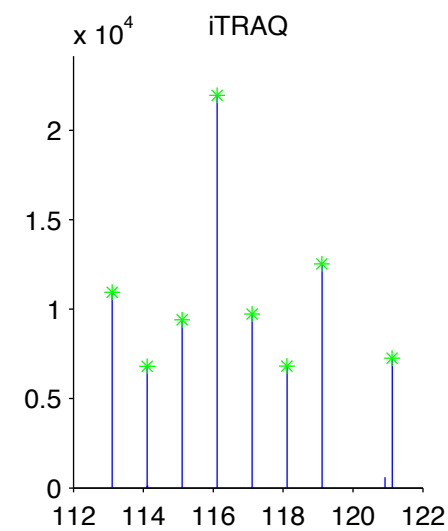

W[D]s[Y]E[N]M[S]A[D]G[E]V[L]H[T]Q[G]P[V]D[G]S[L]y[A]K

tensin 3

Charge State: +4

Scan Number: 5022

File Name: 100827ptp1blivers\_ncHFD\_basal.raw

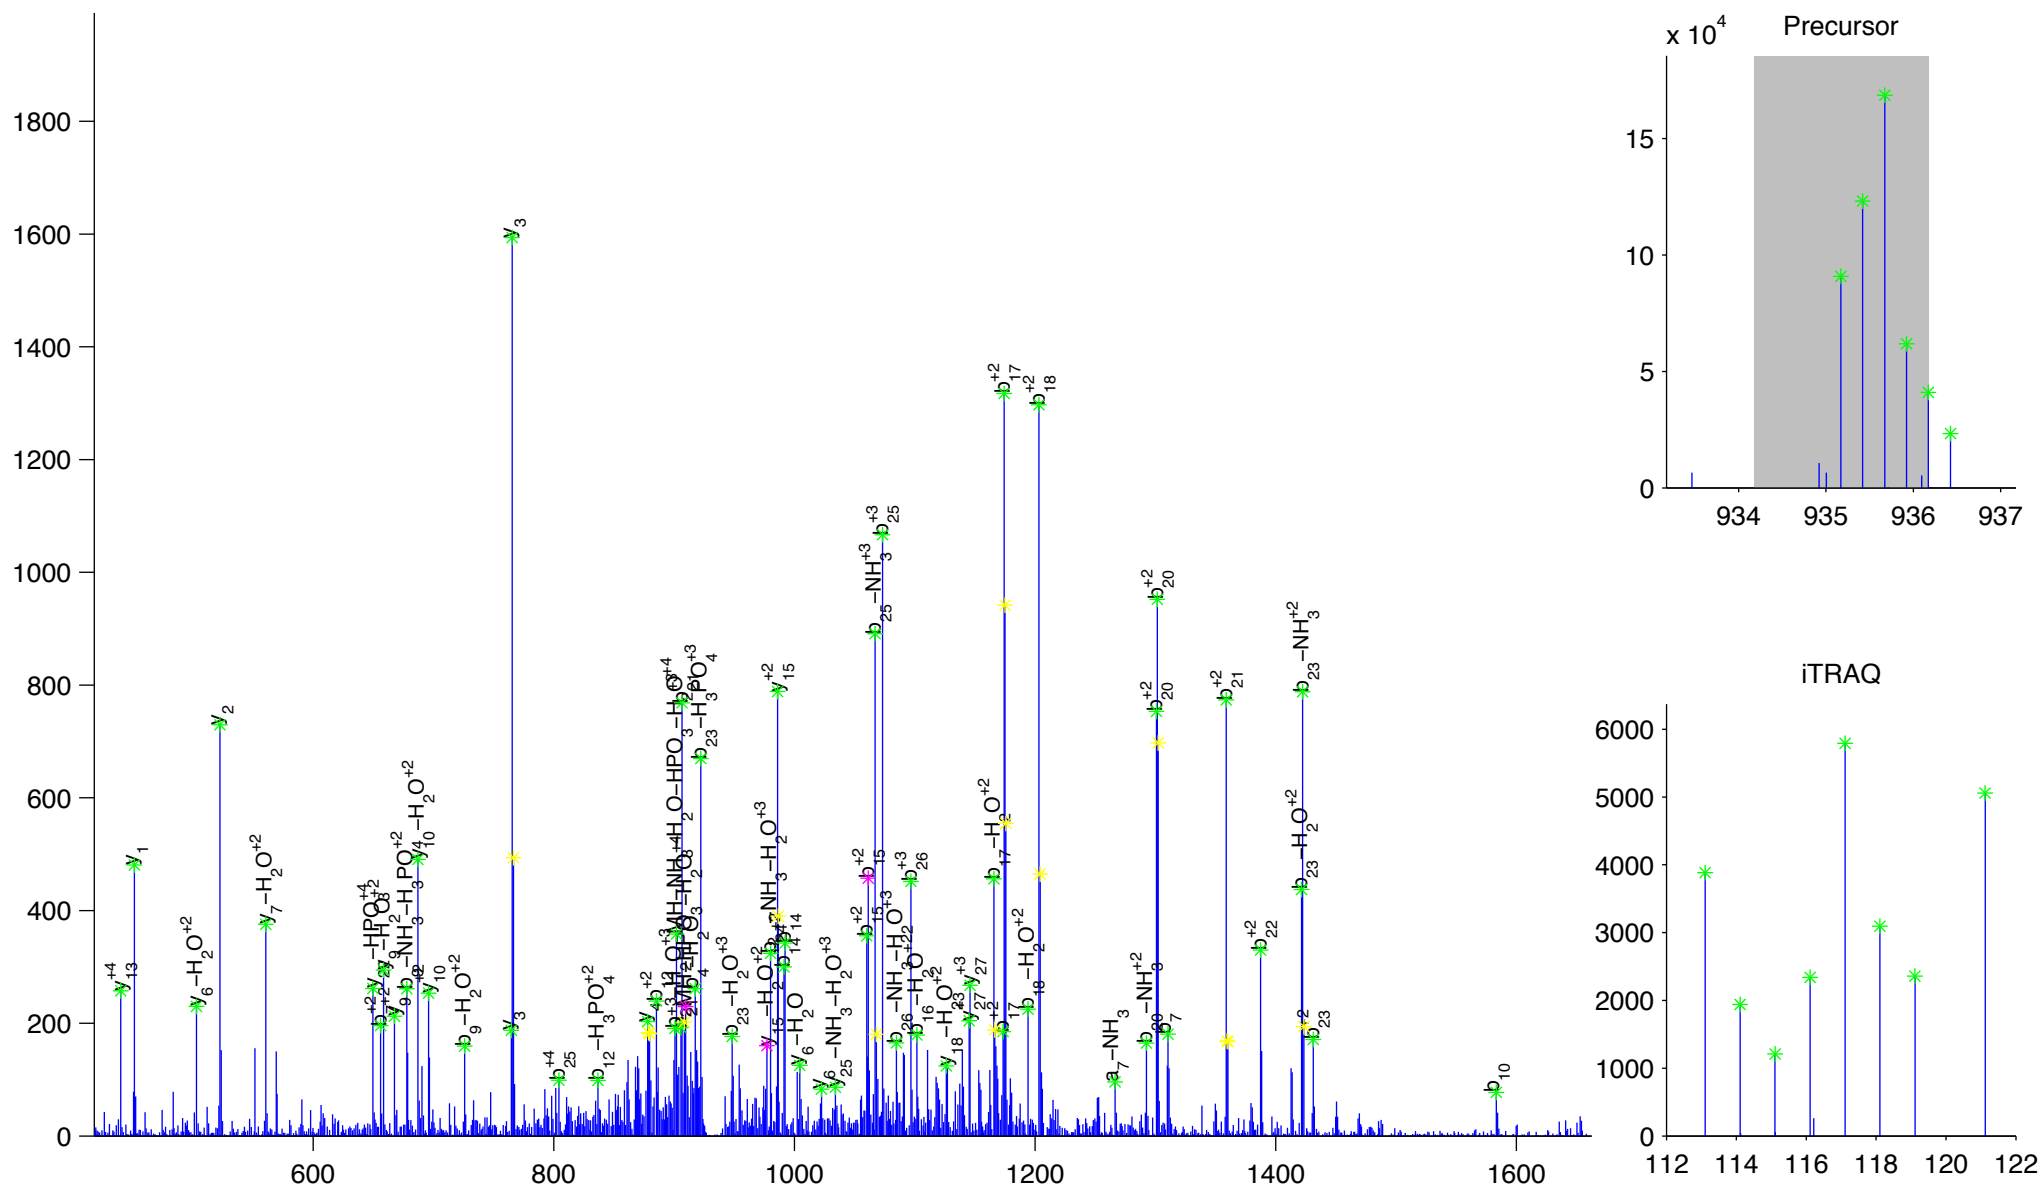

W [ D ] S [ y ] E [ N ] M [ S ] A [ D ] G [ E ] V [ L ] H [ T ] Q [ G ] P [ V ] D [ G ] S [ L ] y [ A ] K

tensin 3

Charge State: +4

Scan Number: 5022

File Name: 100827ptp1blivers\_ncHFD\_basal.raw

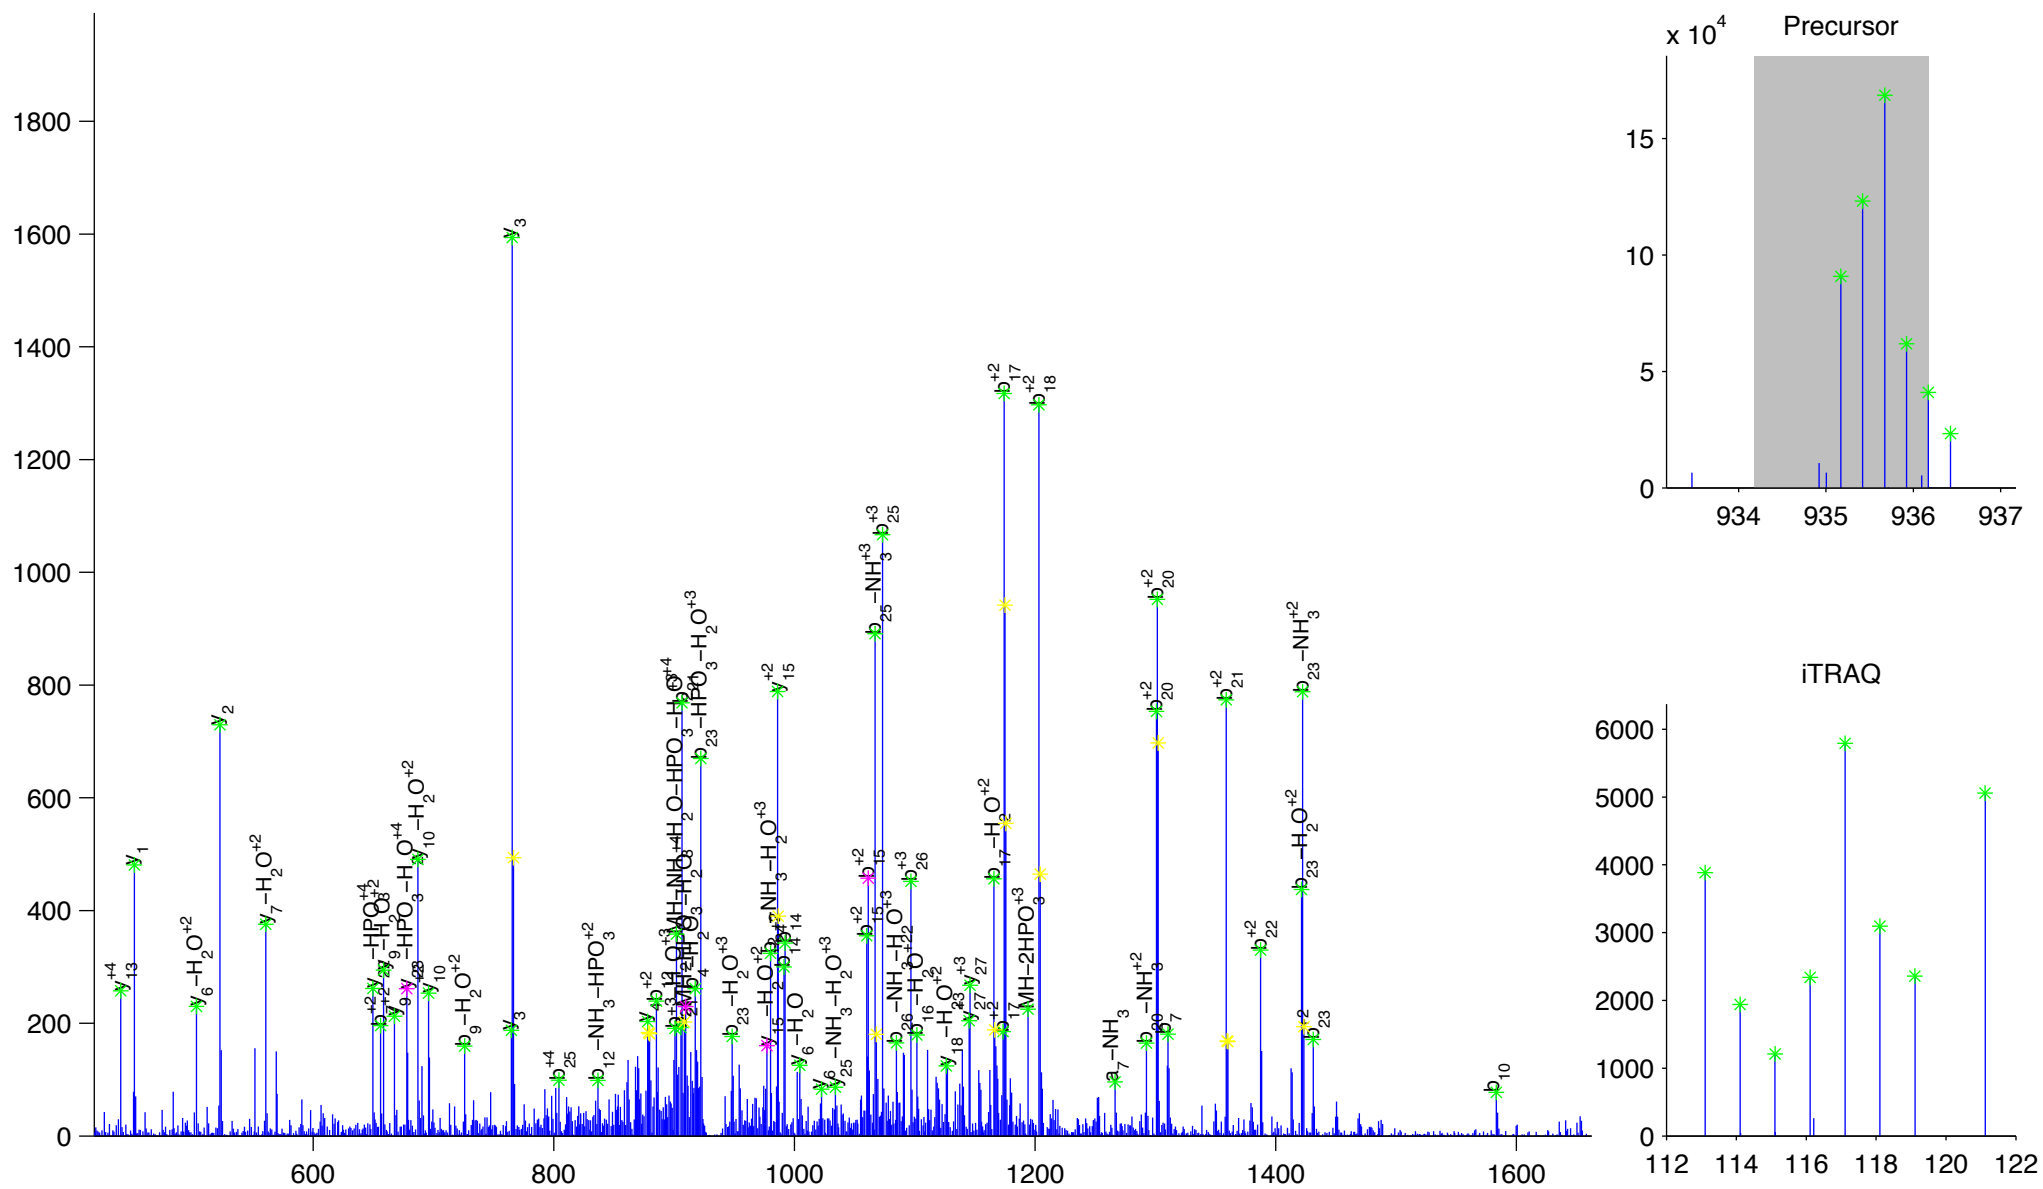

W [ D ] S [ Y ] E [ N ] M [ s ] A [ D ] G [ E ] V [ L ] H [ T ] Q [ G ] P [ V ] D [ G ] S [ L ] y [ A ] K

tensin 3

Charge State: +4

Scan Number: 5022

File Name: 100827ptp1blivers\_ncHFD\_basal.raw

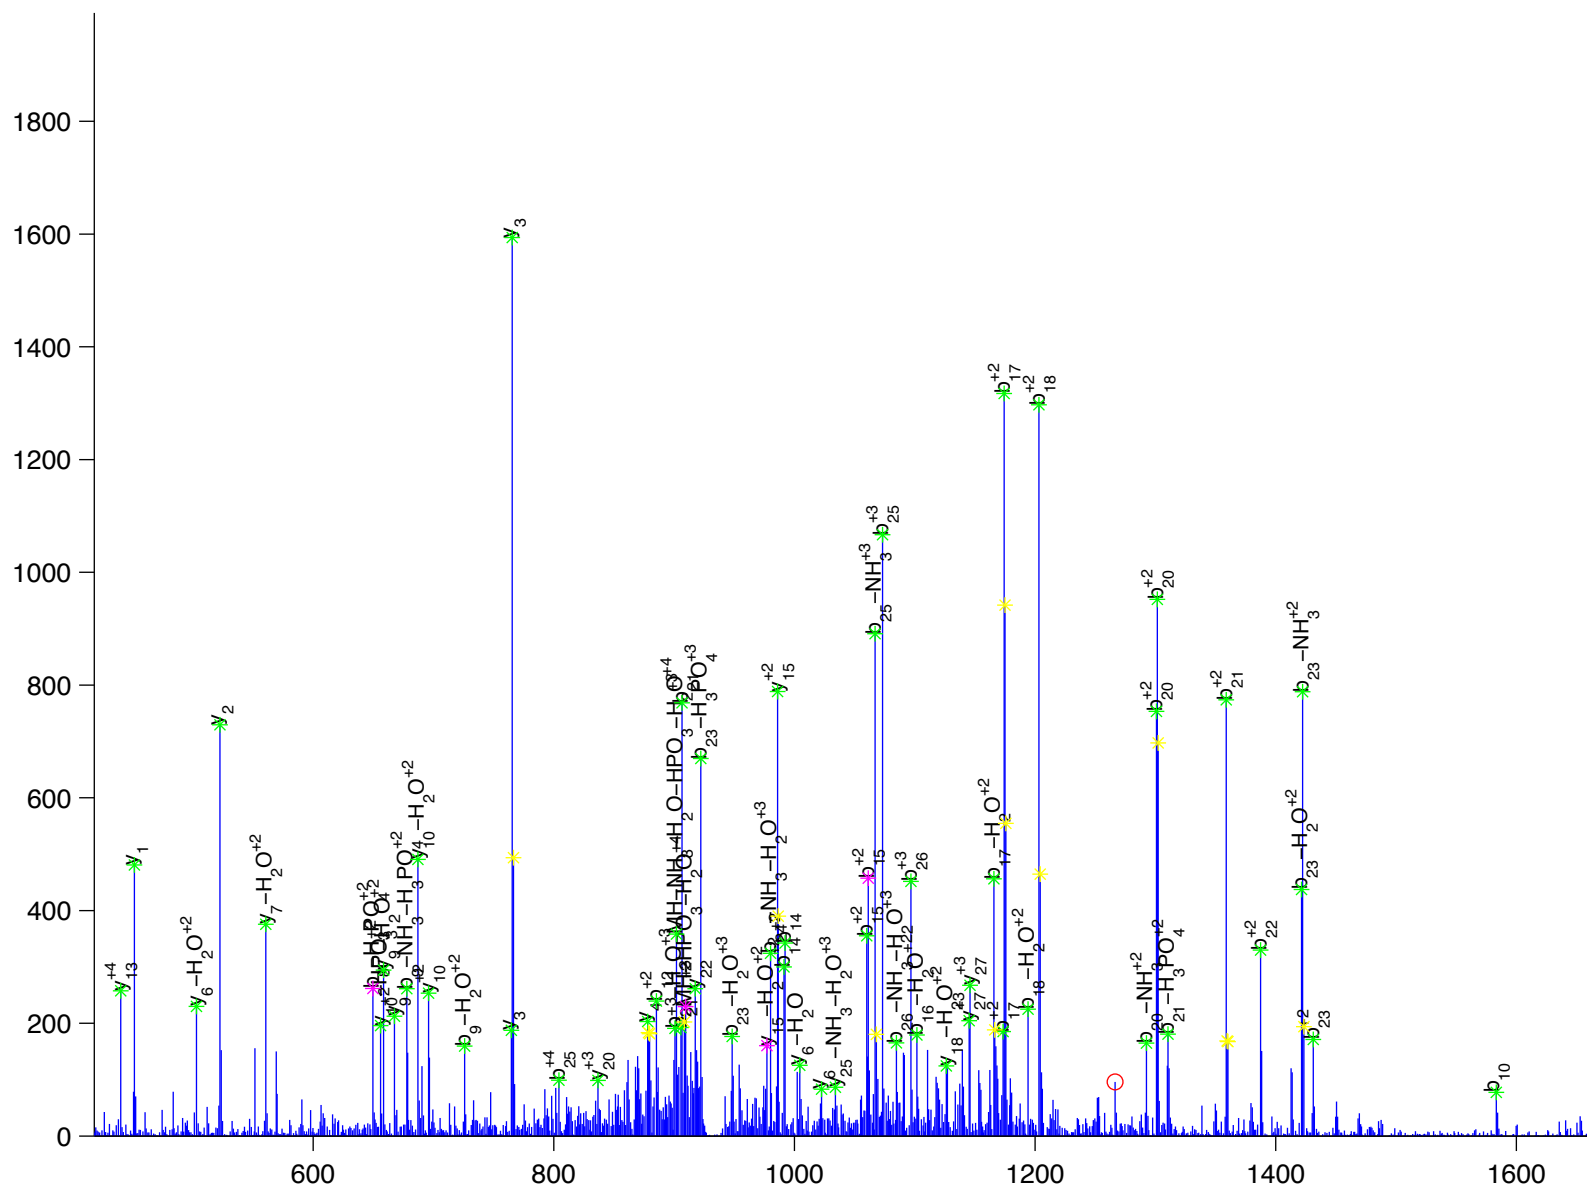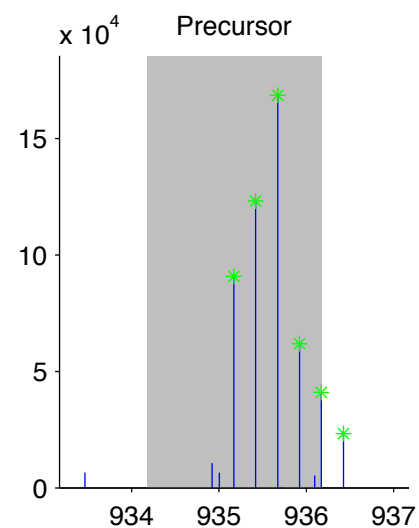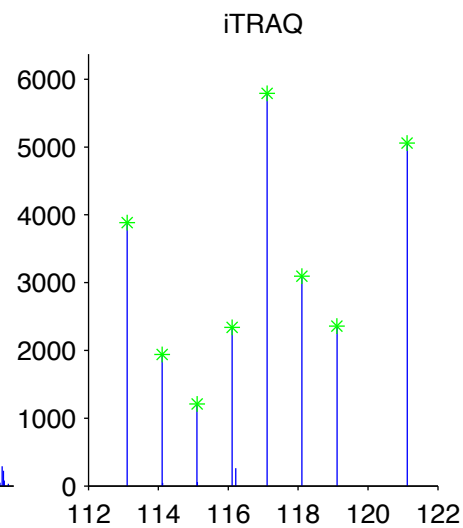

W D S Y E N M S A D G E V L H t Q G P V D G S L y A K

tensin 3

Charge State: +4

Scan Number: 5022

File Name: 100827ptp1blivers\_ncHFD\_basal.raw

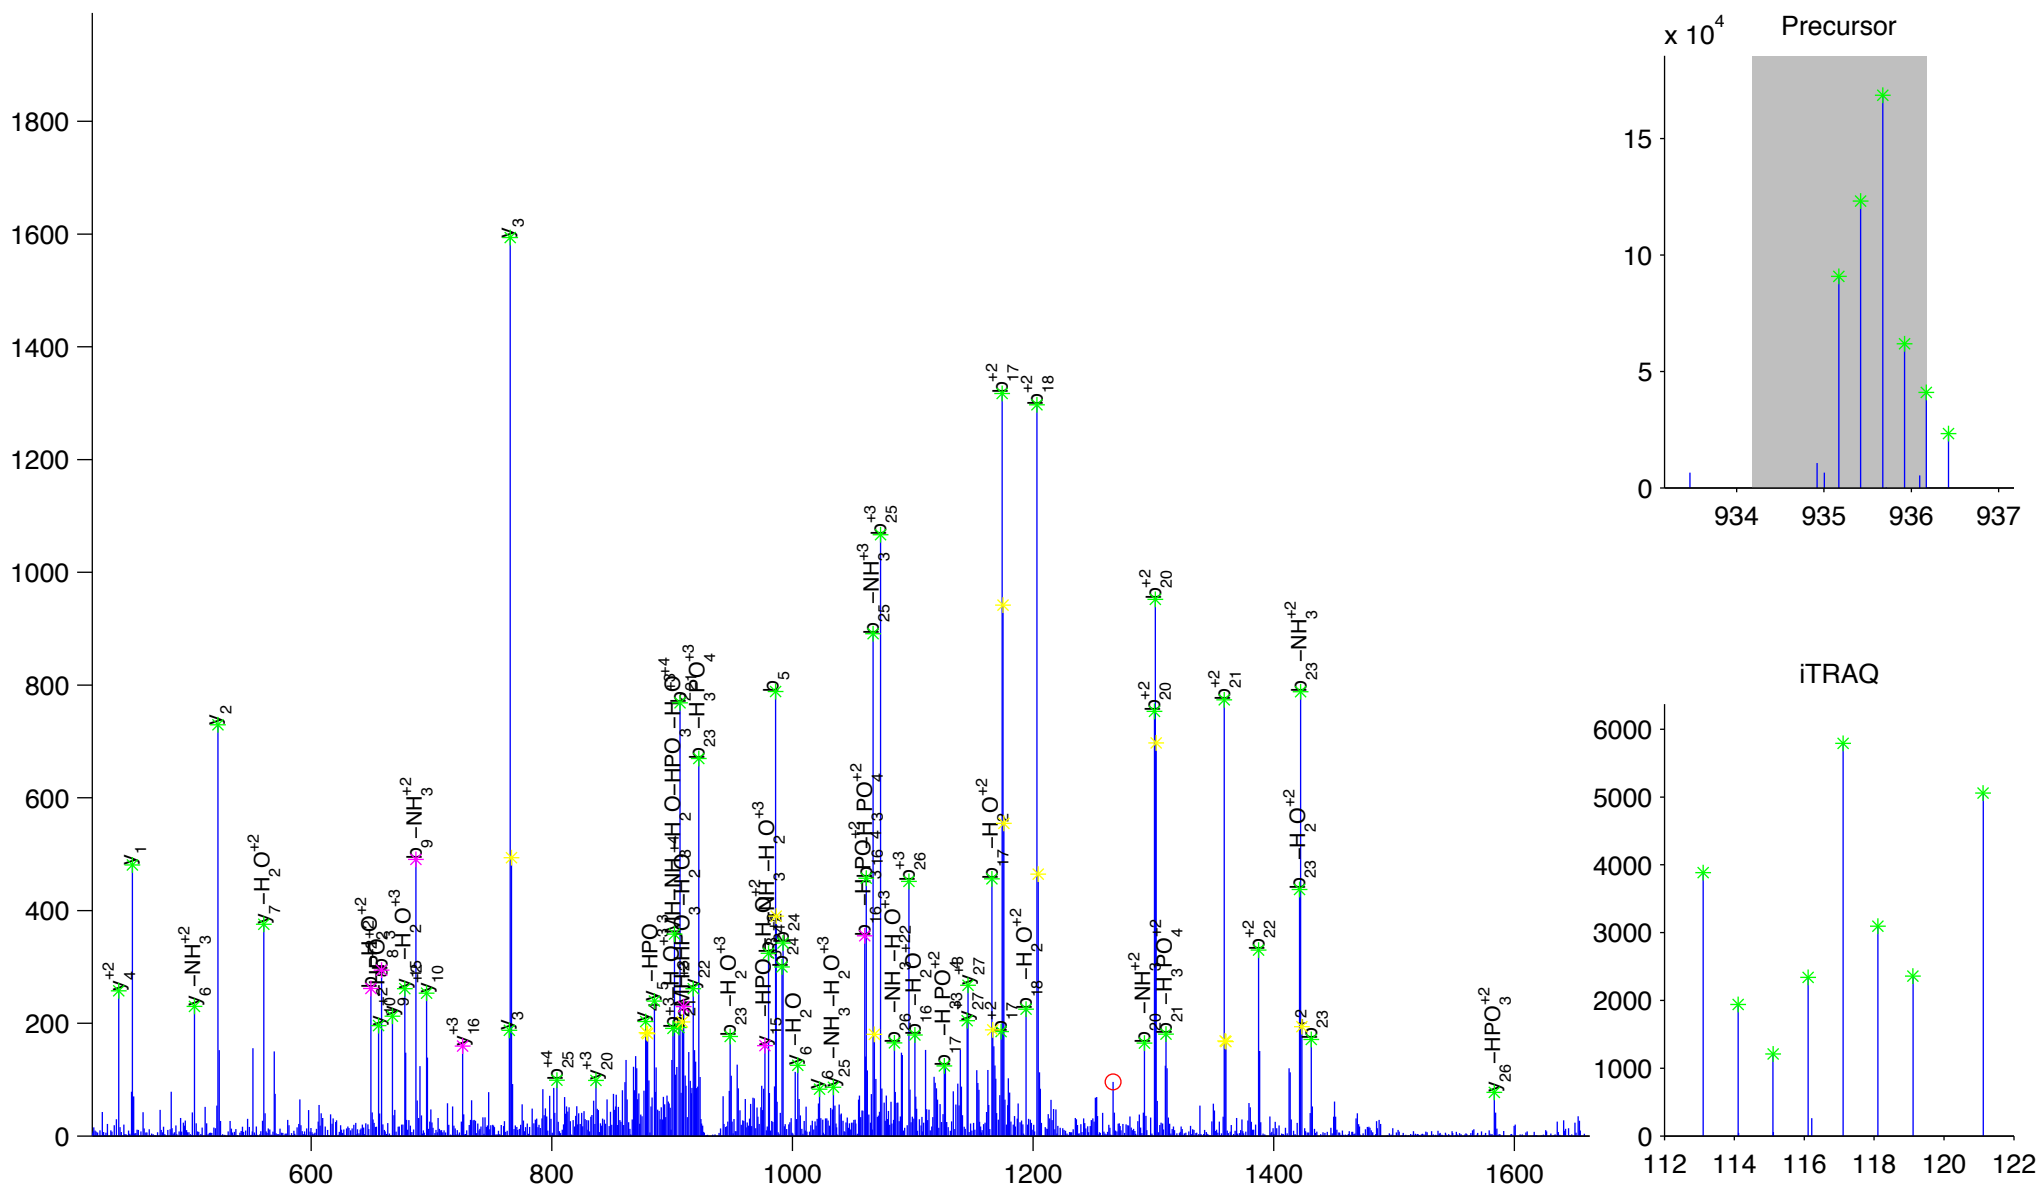

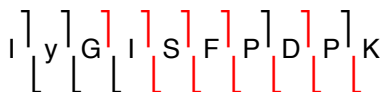

threonyl-tRNA synthetase

Charge State: +3

Scan Number: 9741

File Name: 090807ptp1blivers\_M\_HFD\_basal.raw

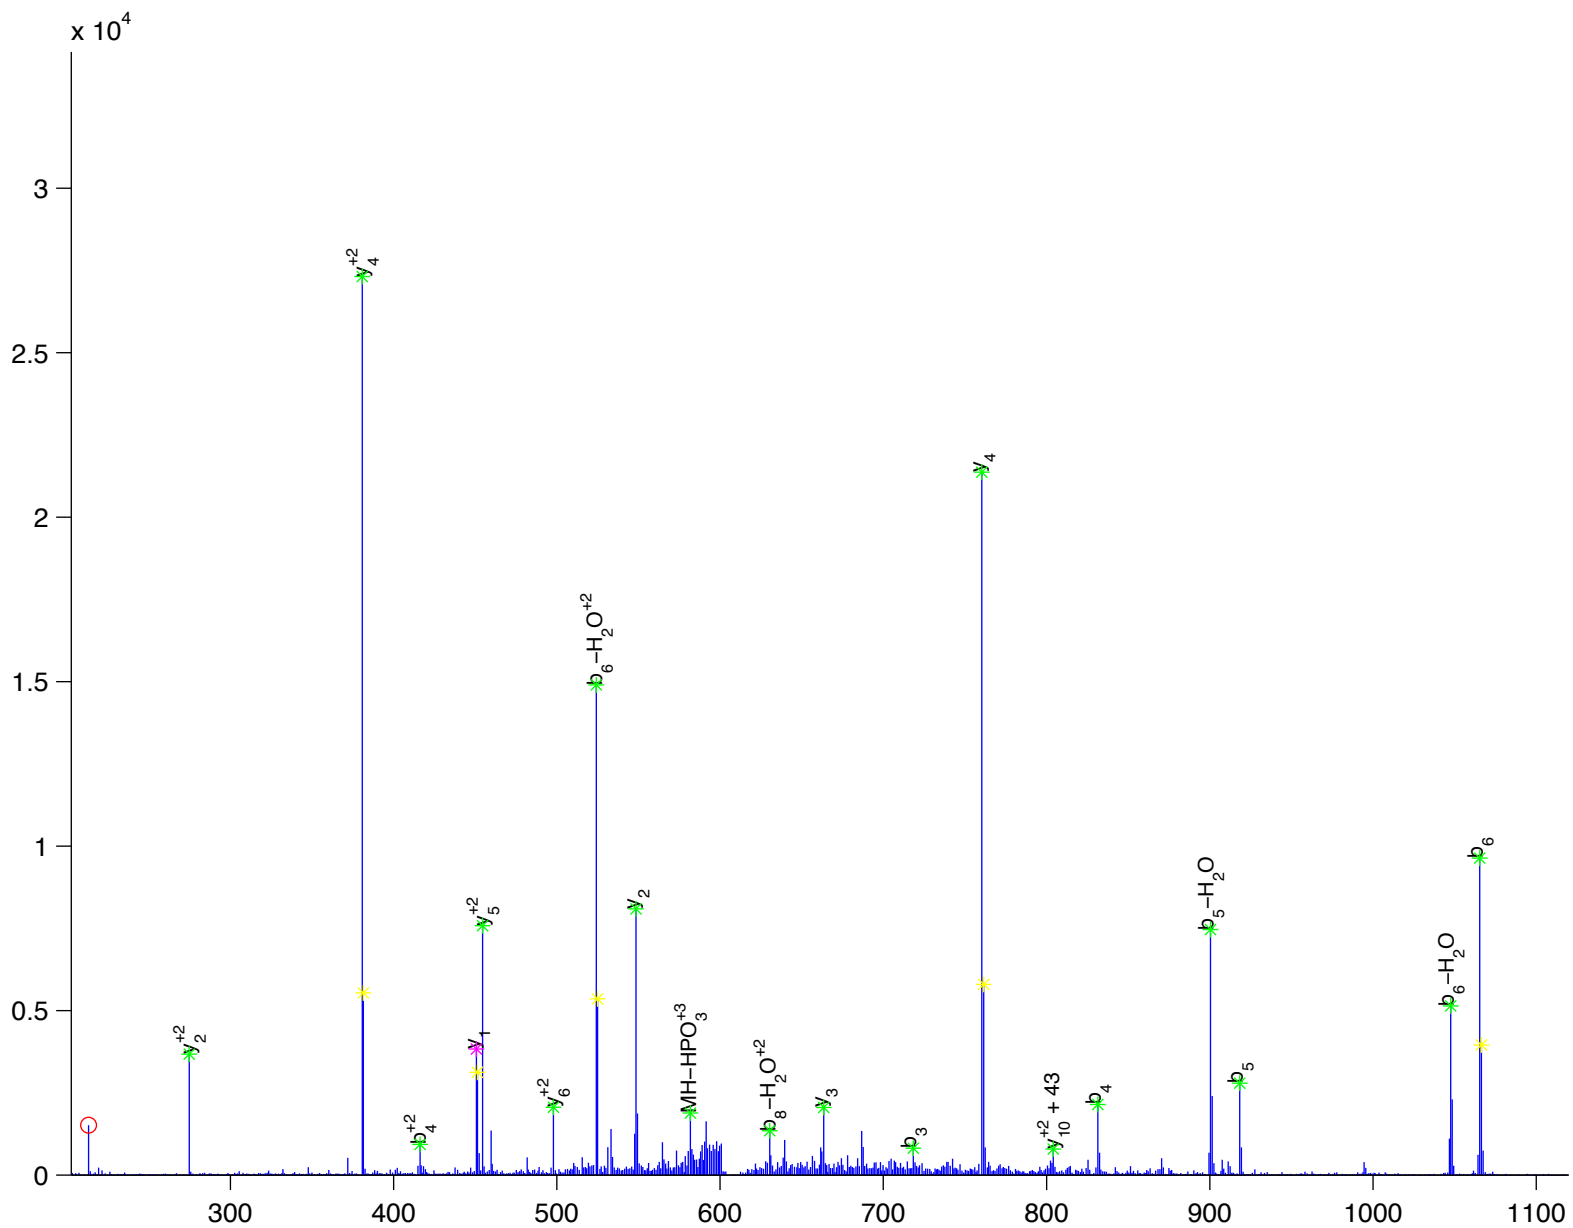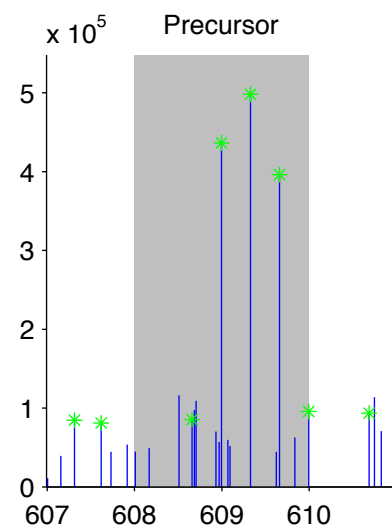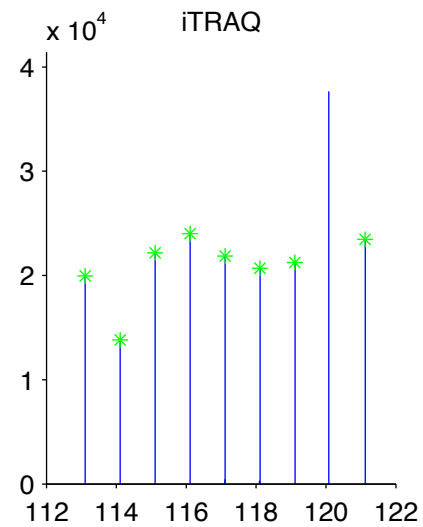

T  
[R] y [E] [Q] [L] [P] R  
[ ] [ ] [ ] [ ] [ ] [ ]

tight junction protein 1

Charge State: +3

Scan Number: 3660

File Name: 091130ptp1blivers\_hfd\_basal2.raw

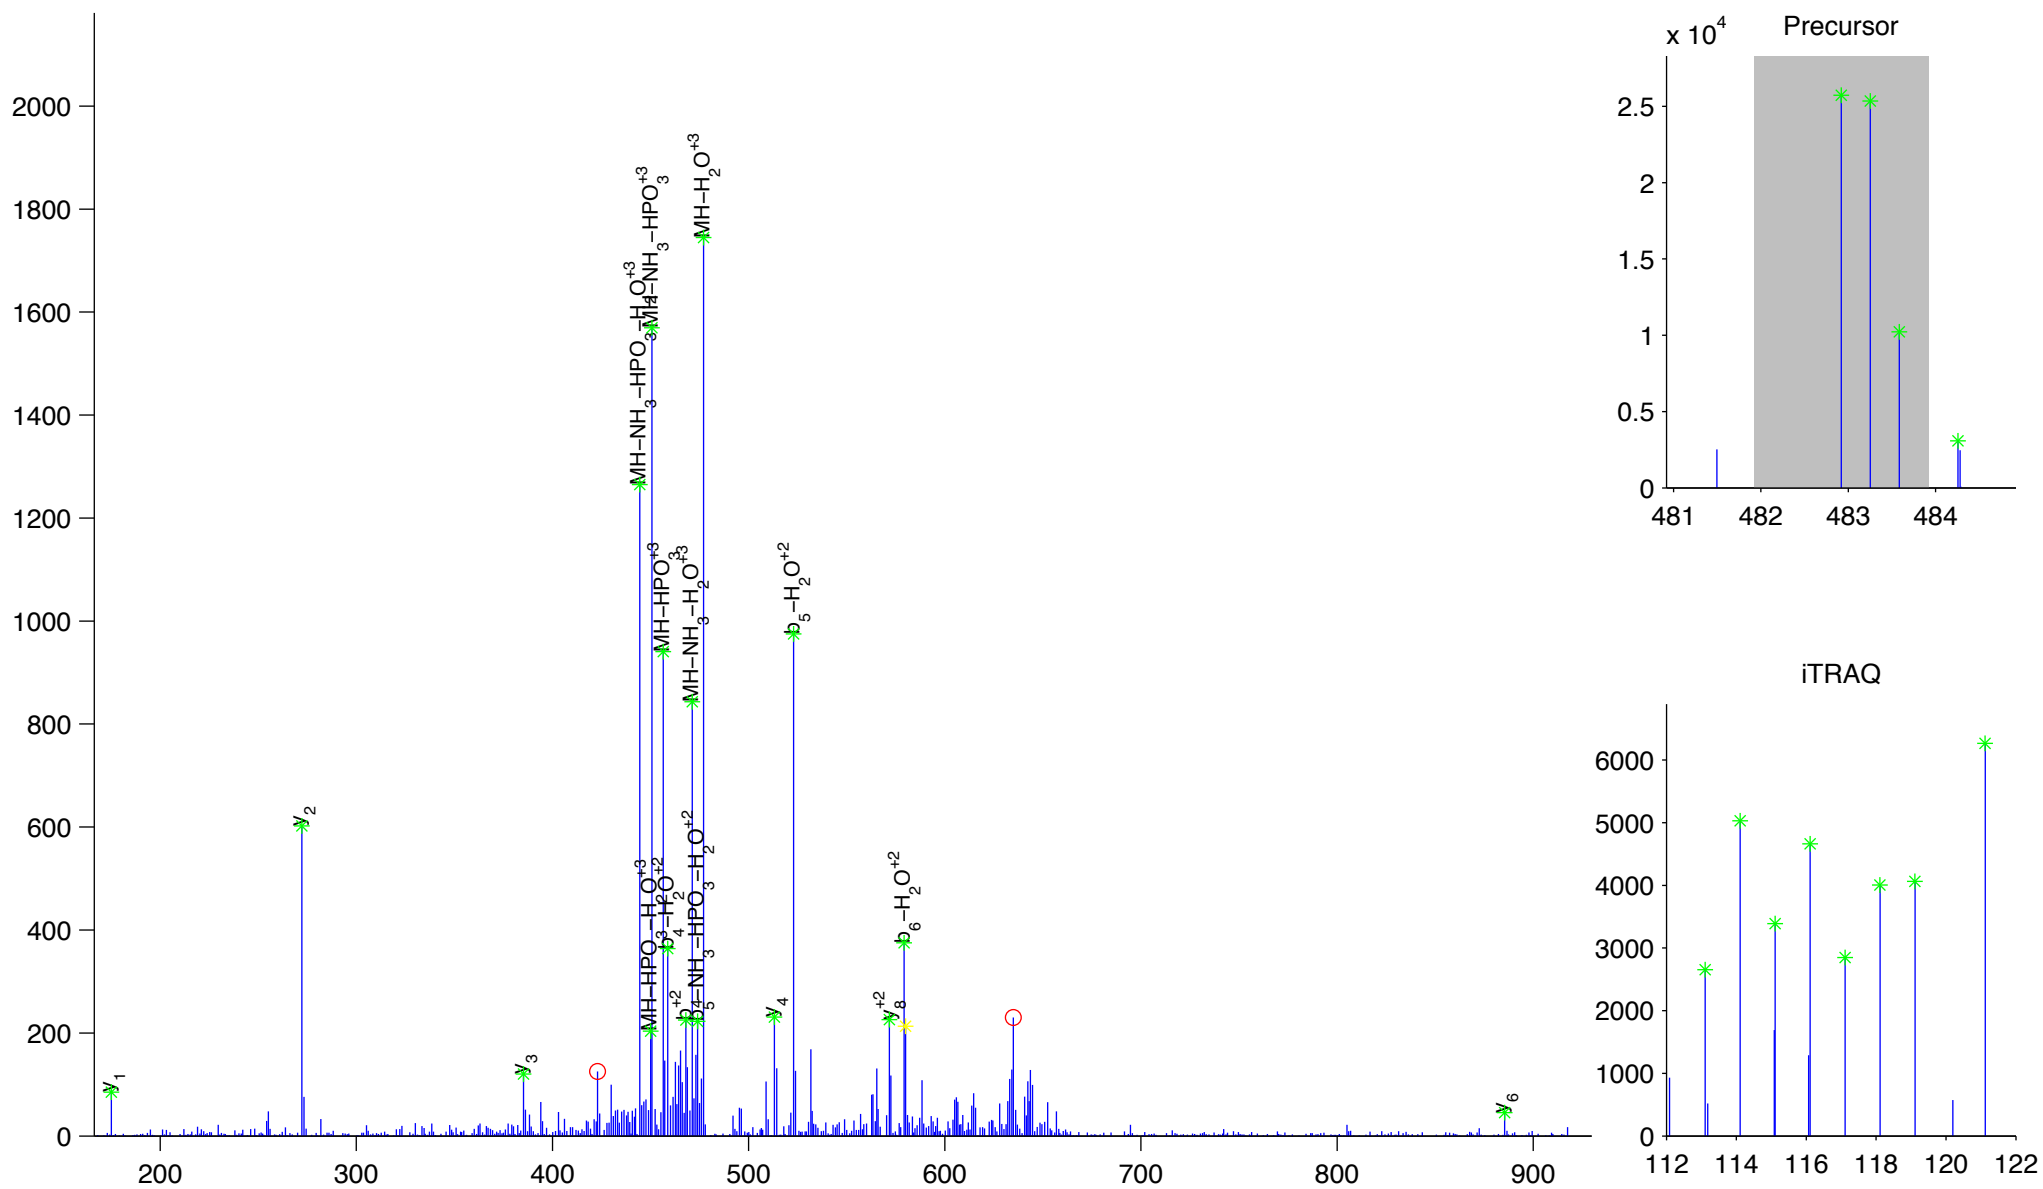

Q [ y ] F [ D ] Q [ Y ] P [ R ]

tight junction protein 1

Charge State: +2

Scan Number: 4447

File Name: 090806ptp1blivers\_M\_NC2.raw

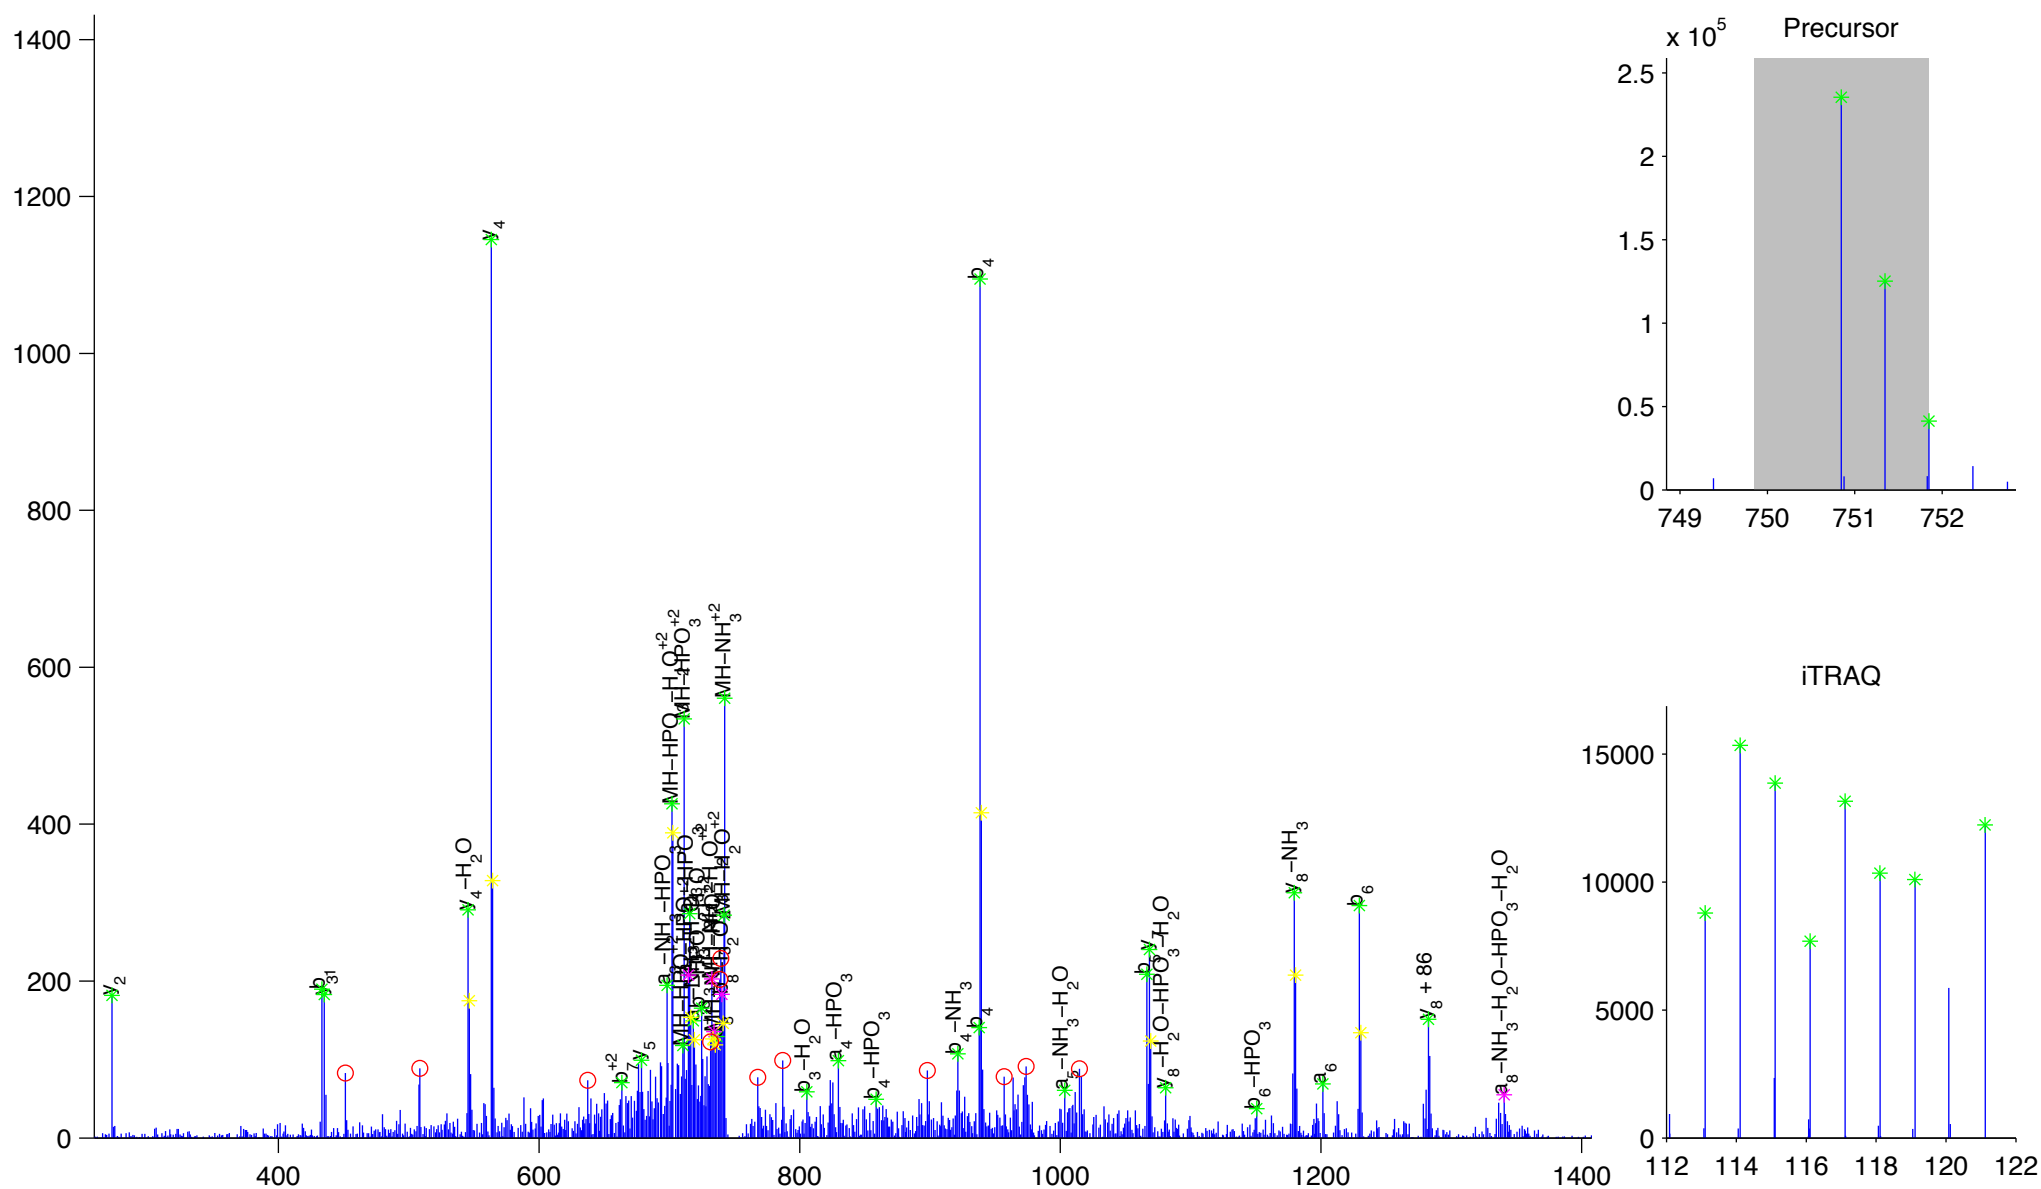



Q [ L S y F D R ] R

tight junction protein 1

Charge State: +3

Scan Number: 4741

File Name: 091130ptp1blivers\_hfd\_basal2.raw

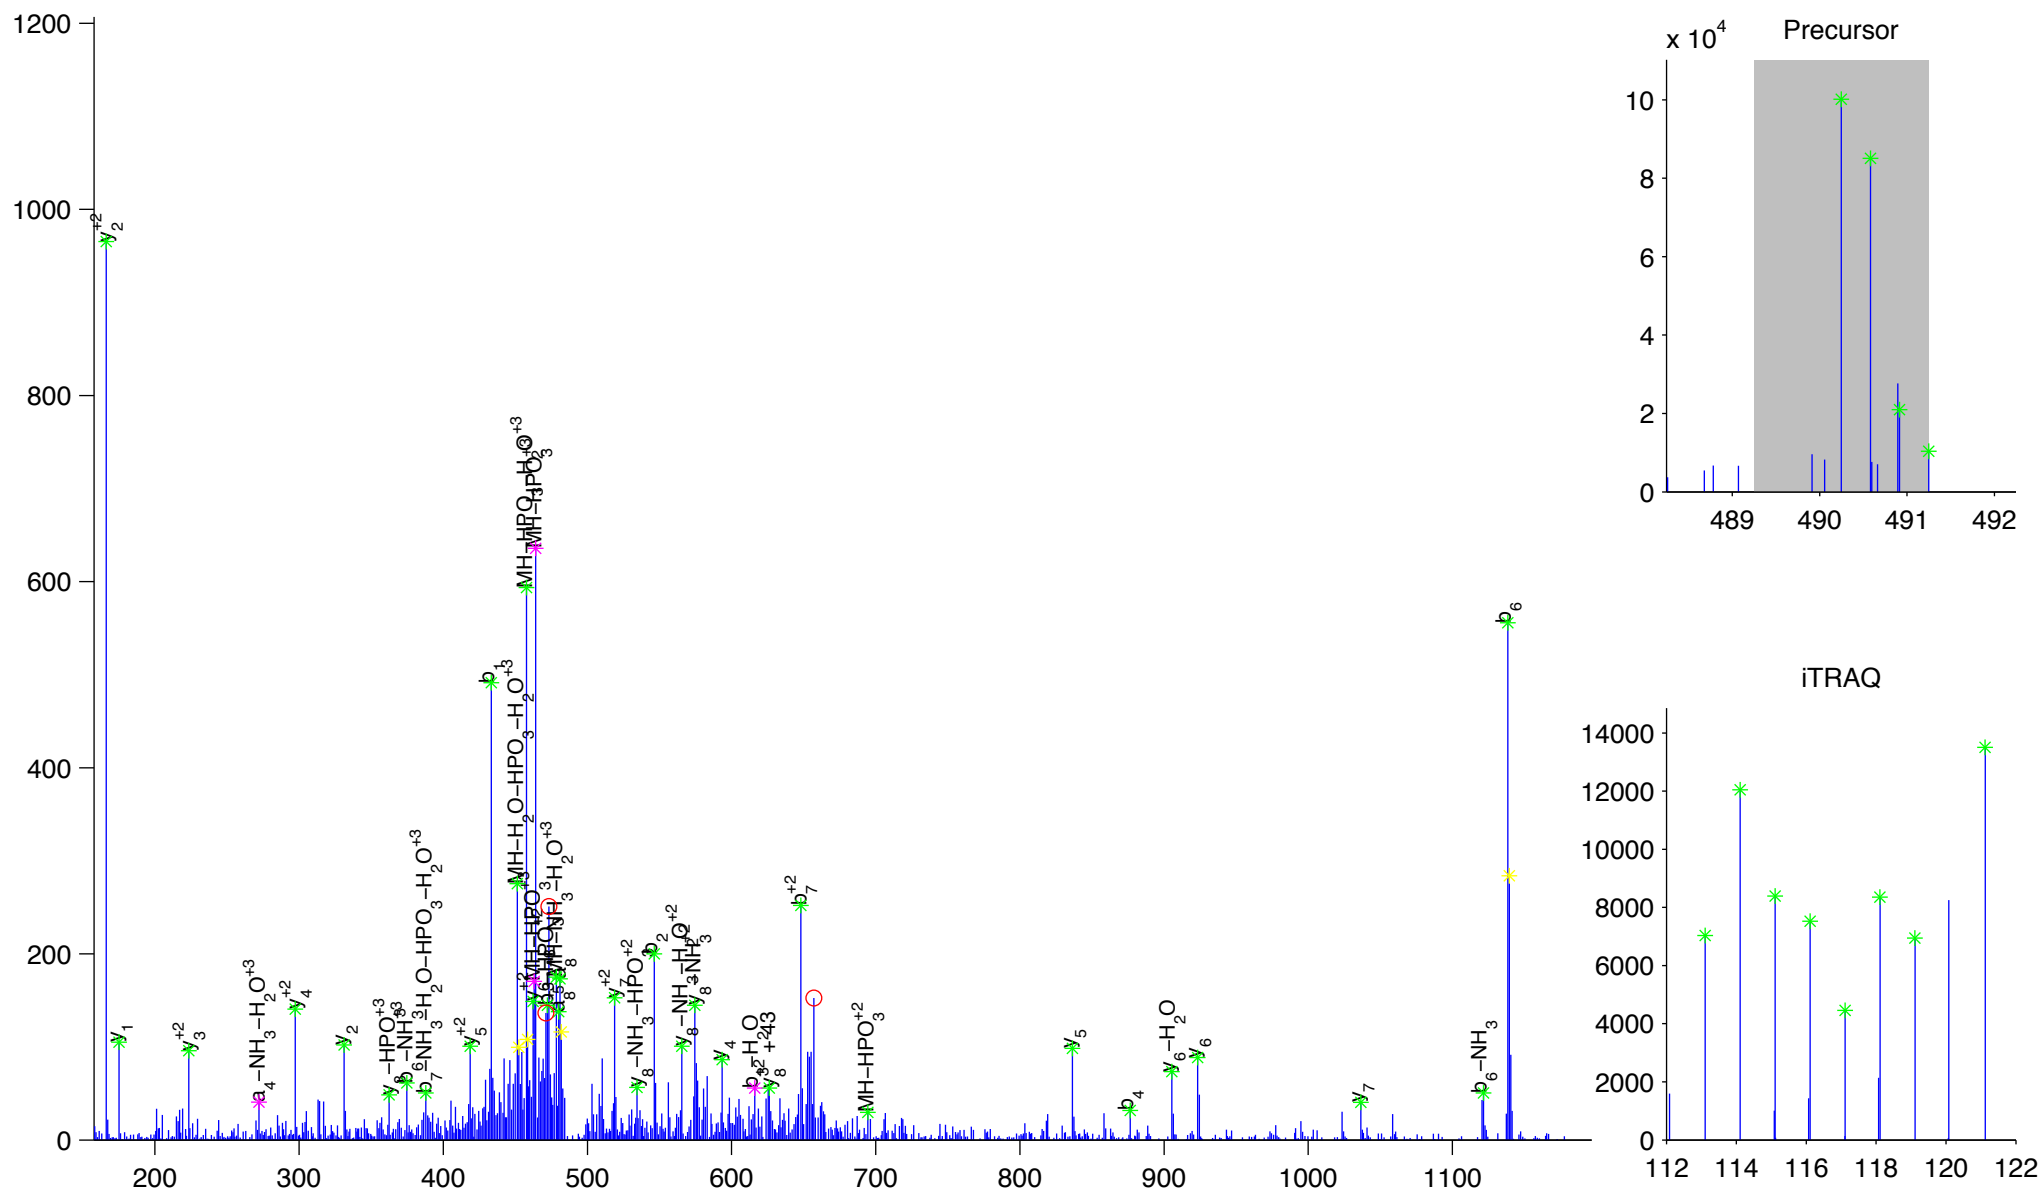

Y [ E ] V [ S ] S [ y ] T [ D ] Q [ F ] S [ R ]

tight junction protein 1

Charge State: +2

Scan Number: 6615

File Name: 090807ptp1blivers\_M\_HFD\_basal.raw

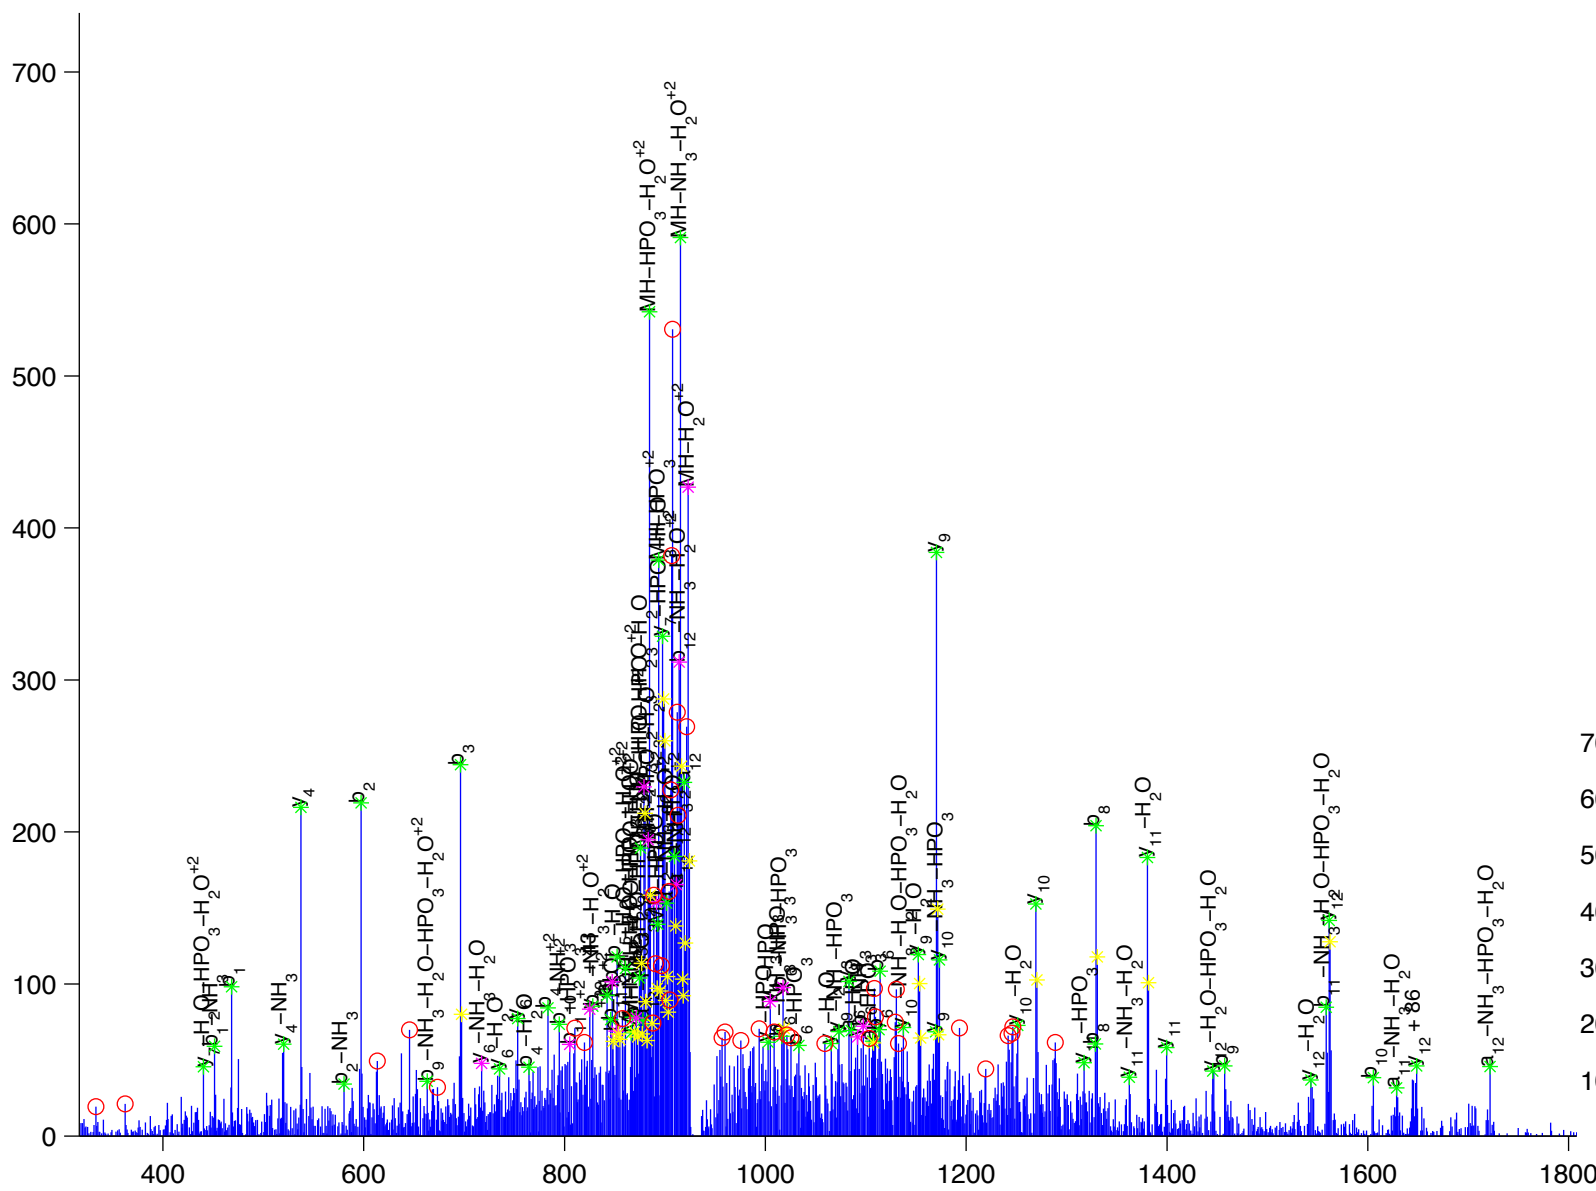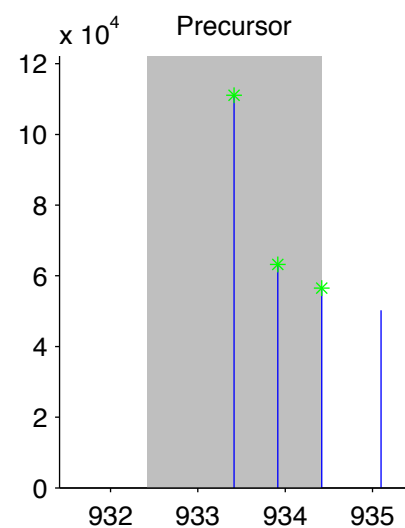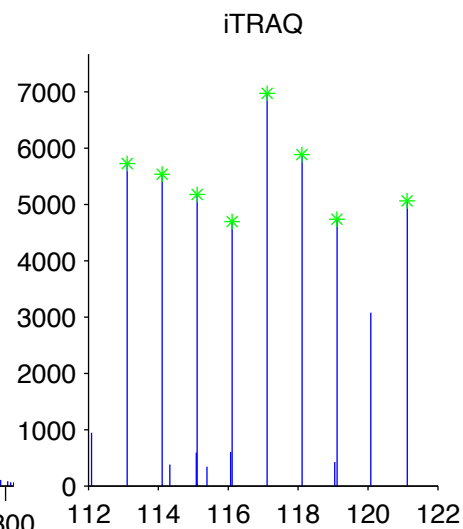

V[F]L[R]P[S]P[E]D[E]A[I]y[G]P[N]T[K]

tight junction protein 2

Charge State: +4

Scan Number: 5782

File Name: 100908ptp1blivers\_ncHFD3\_basal.raw

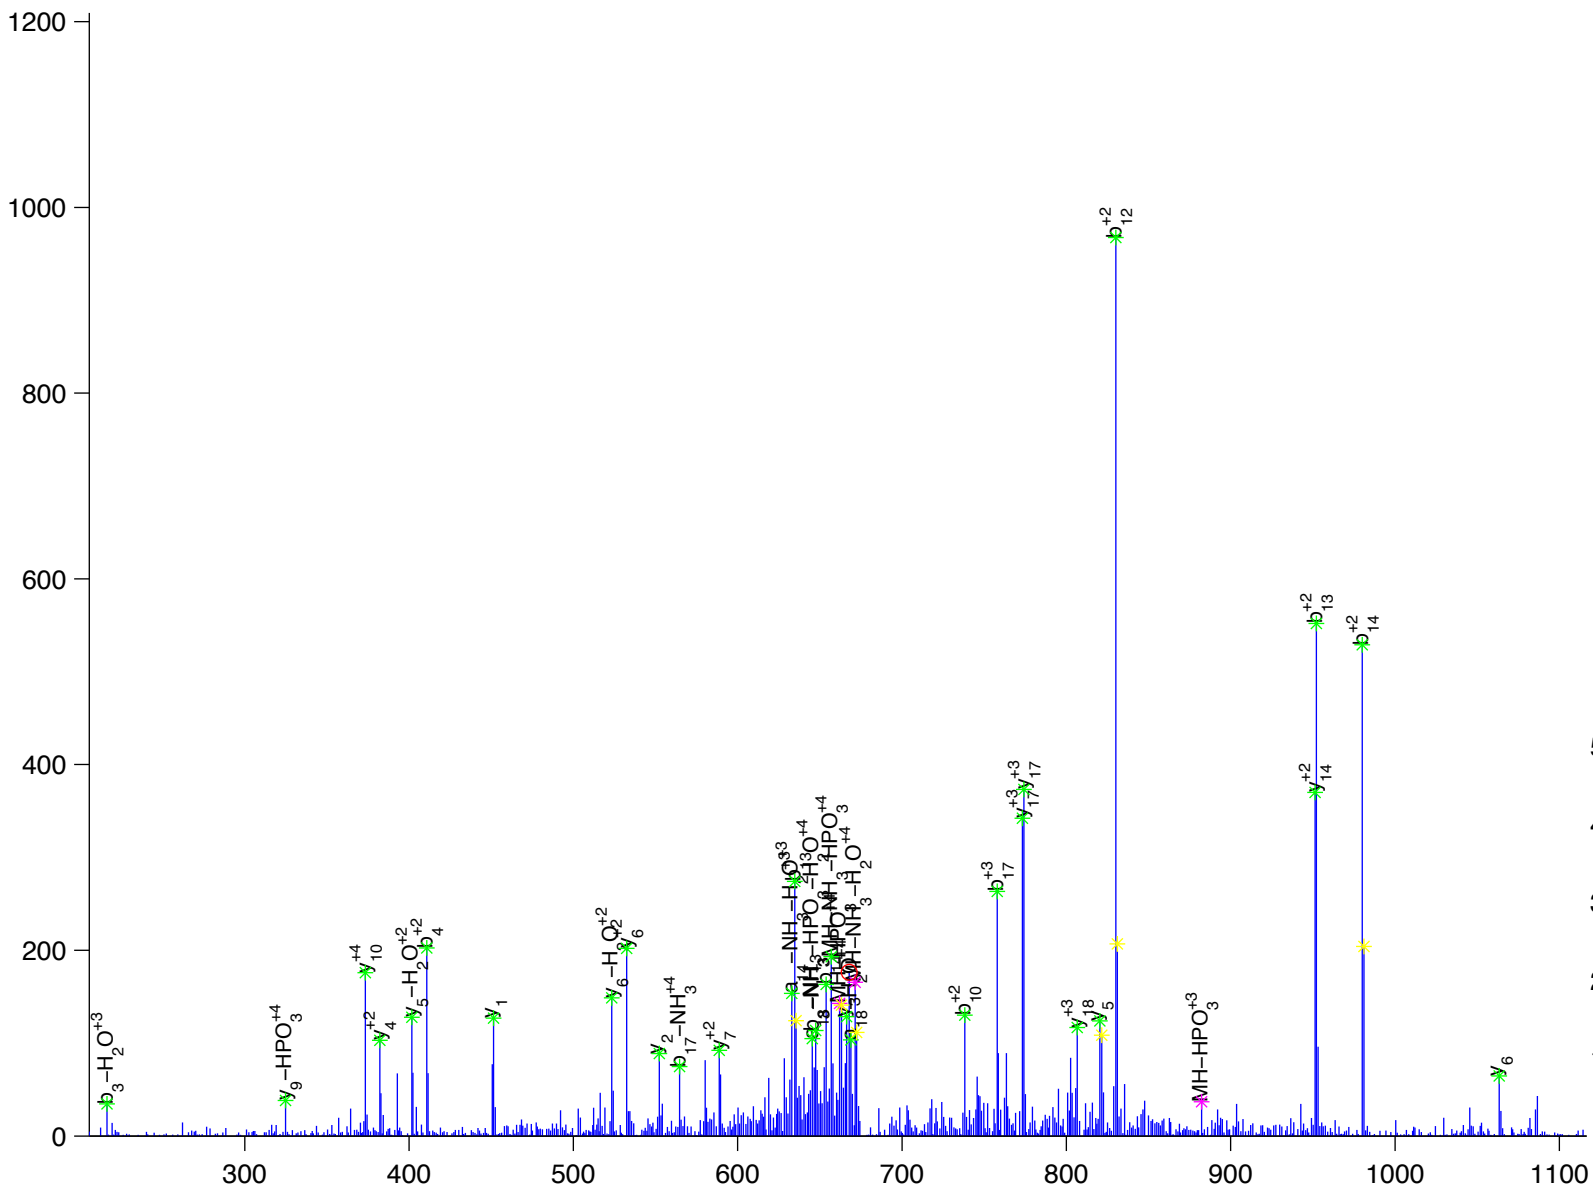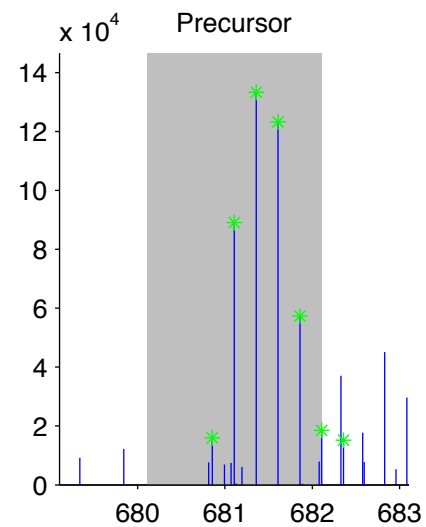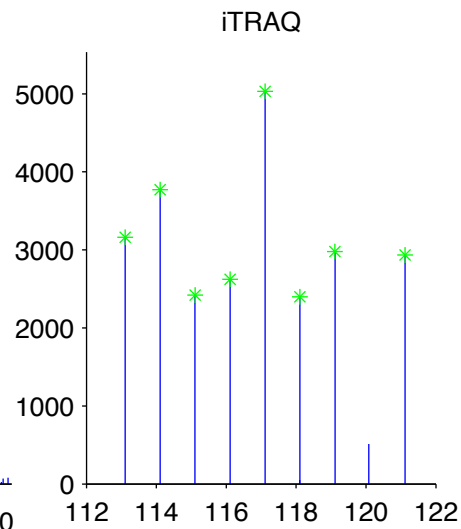

S [ E ] G [ T ] y [ C ] C [ G ] P [ V ] S [ V ] R

transglutaminase 2, C polypeptide

Charge State: +2

Scan Number: 4248

File Name: 091130ptp1blivers\_hfd\_basal2.raw

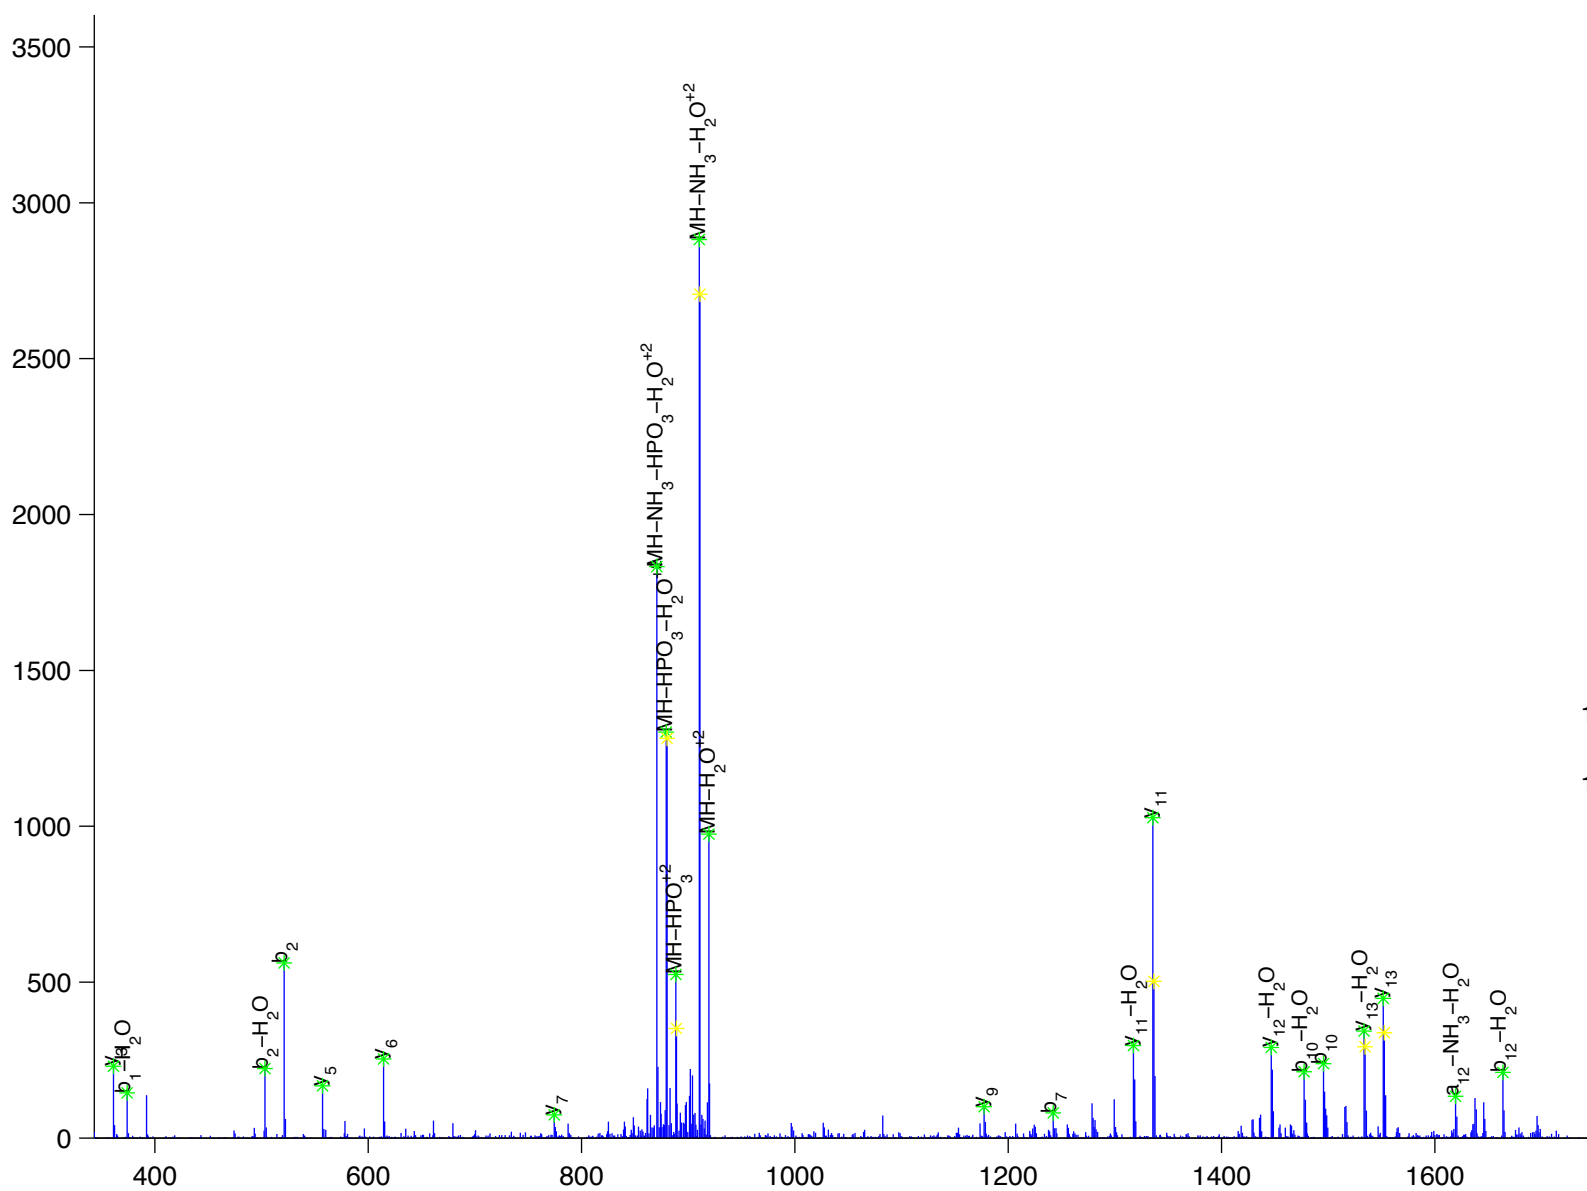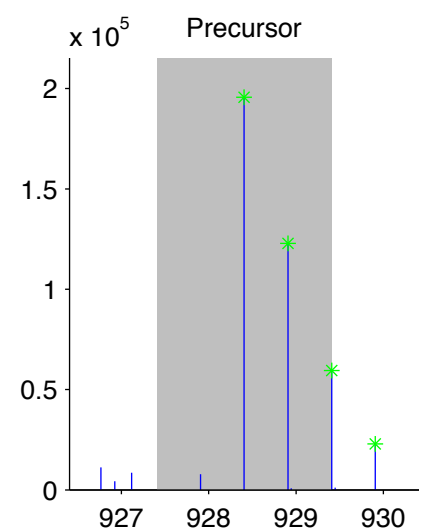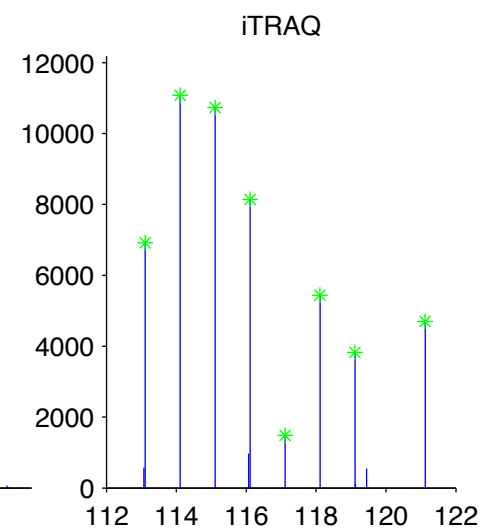

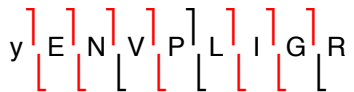

tweety 2

Charge State: +2

Scan Number: 5982

File Name: 091130ptp1blivers\_hfd\_basal2.raw

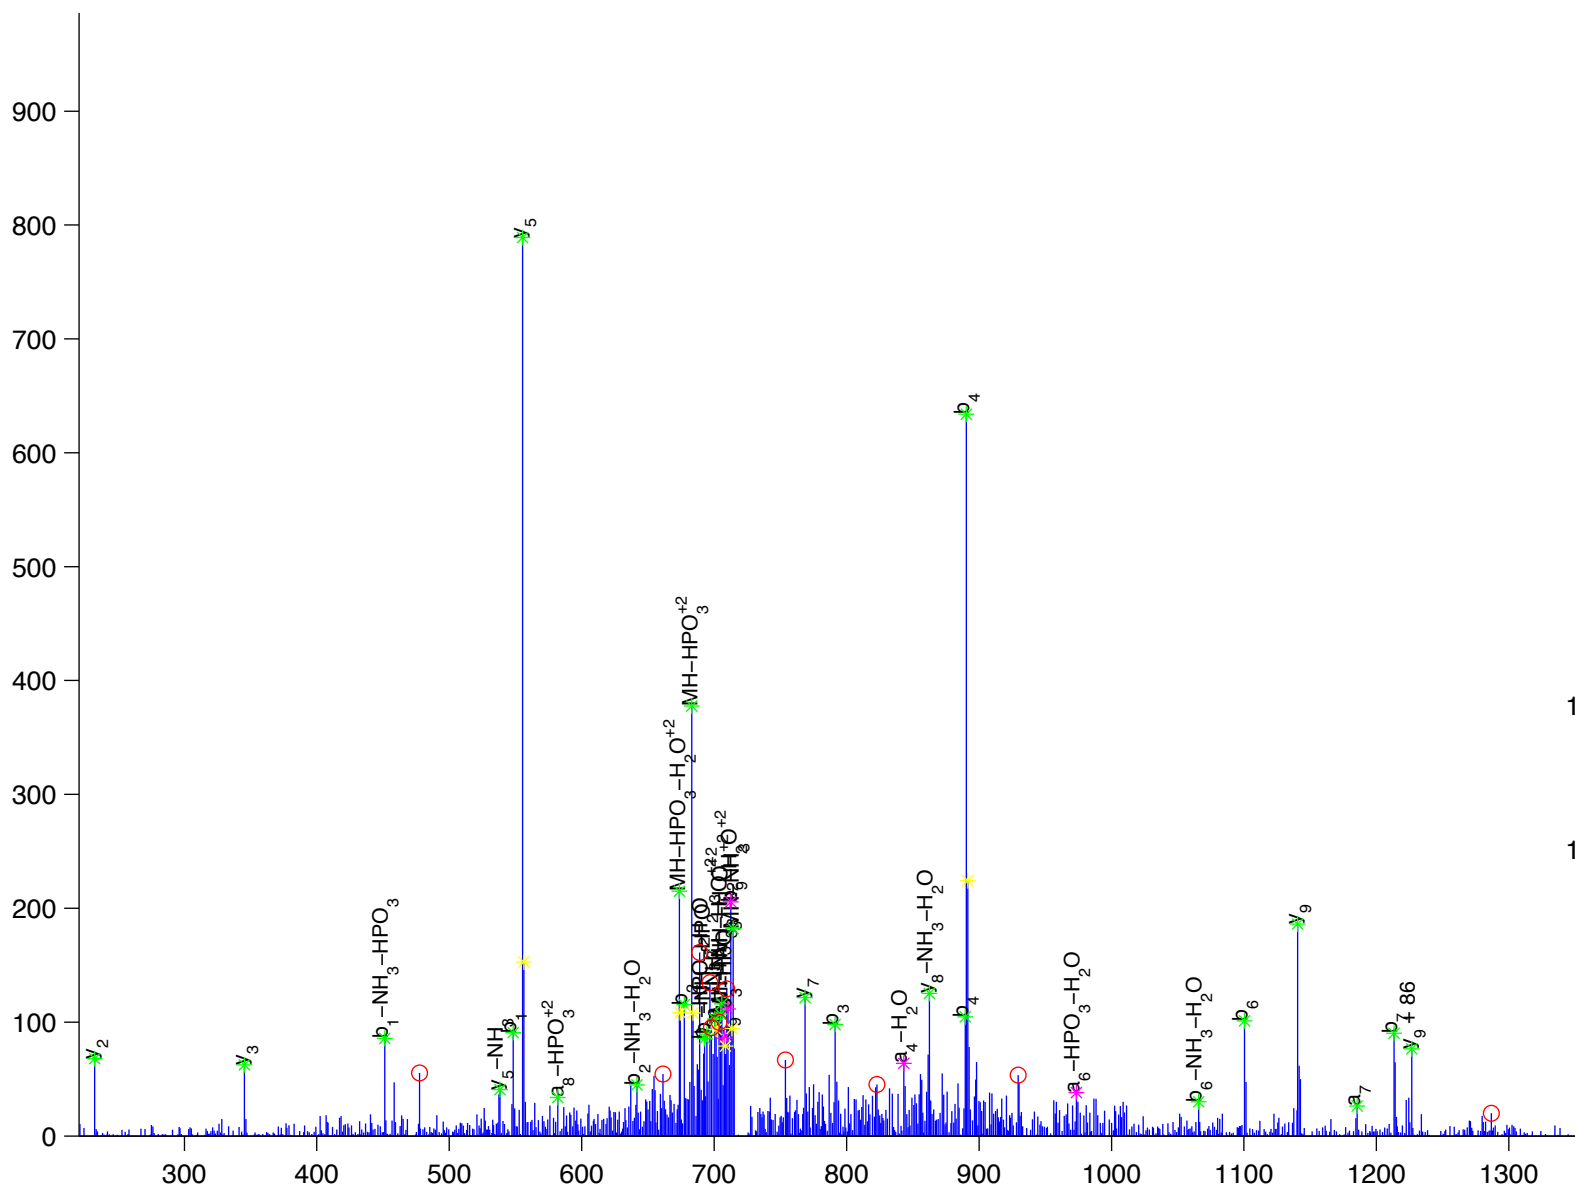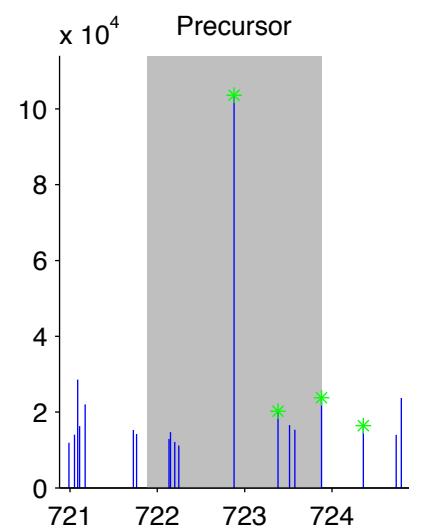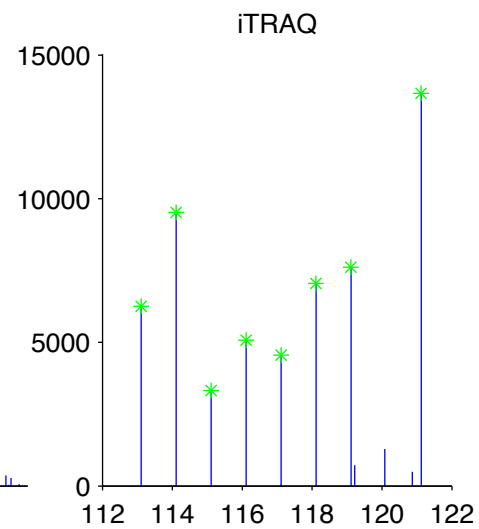

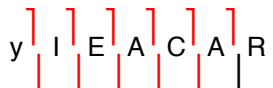

UDP-glucose dehydrogenase

Charge State: +2

Scan Number: 4105

File Name: 091130ptp1blivers\_hfd\_basal2.raw

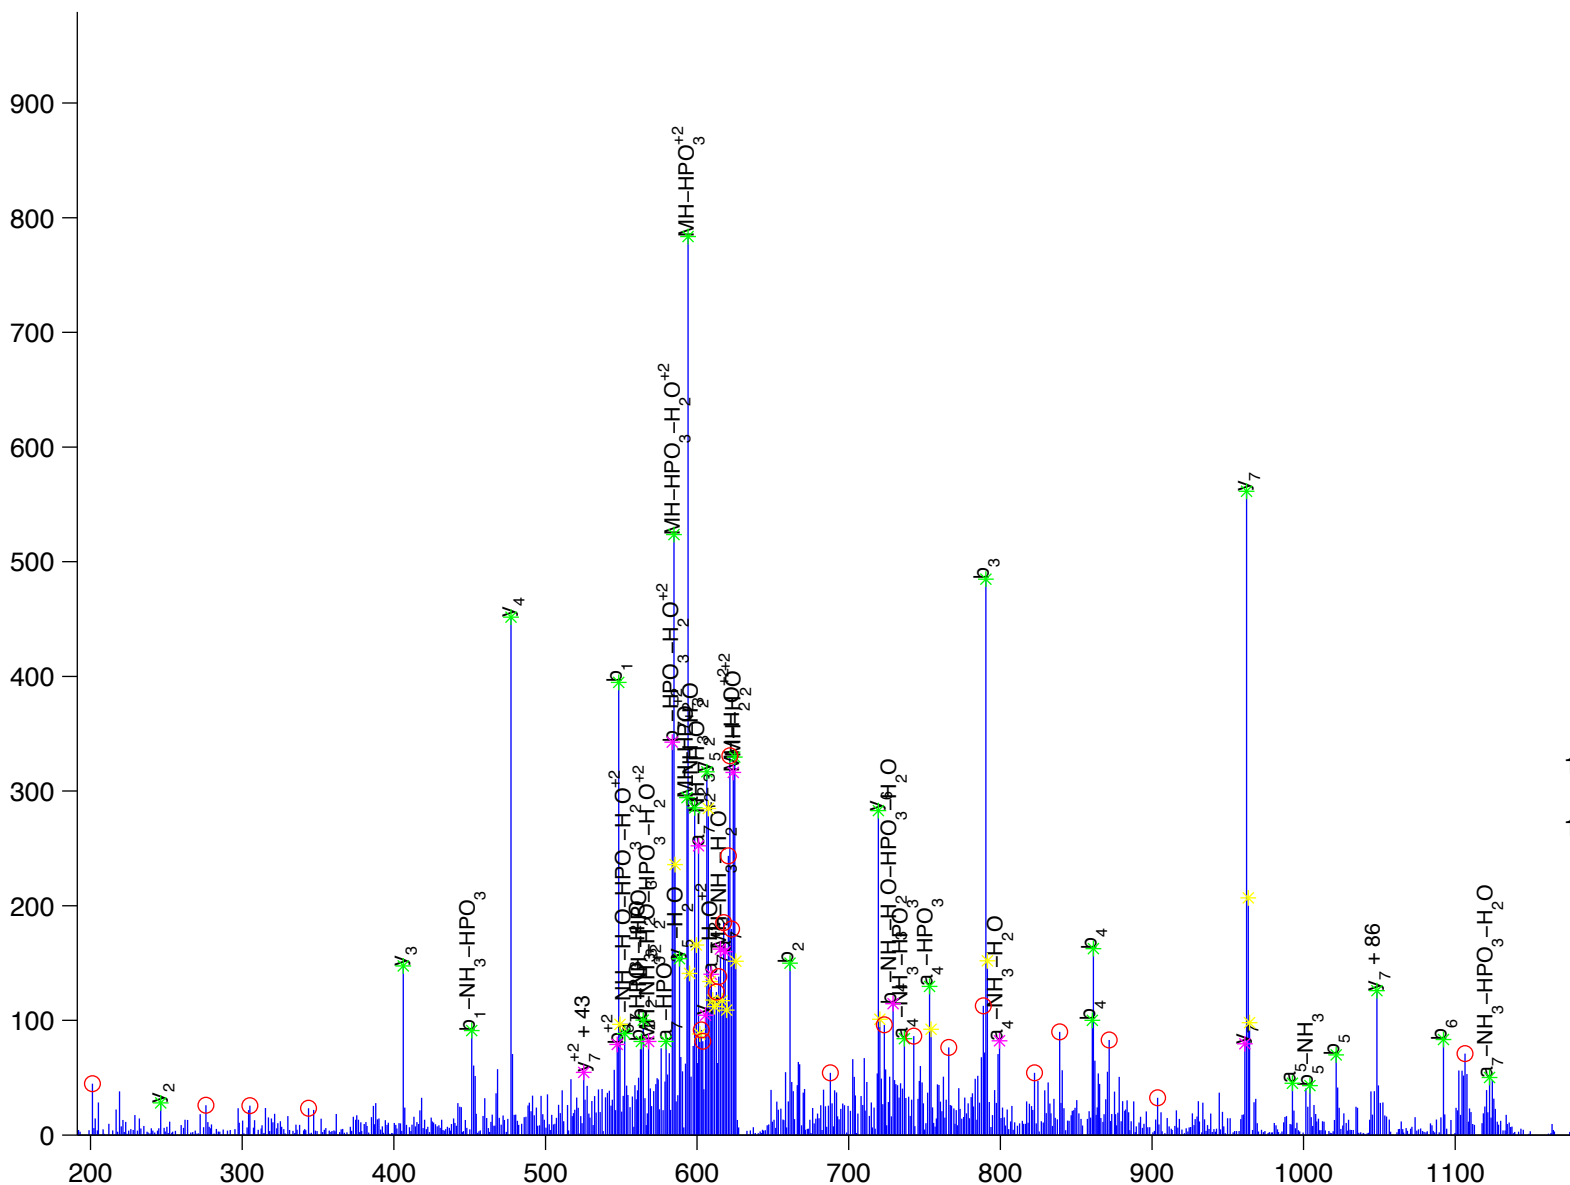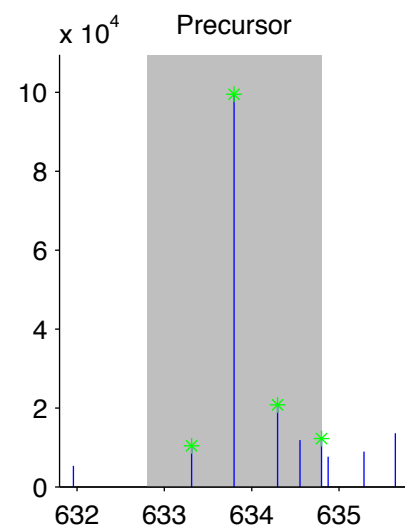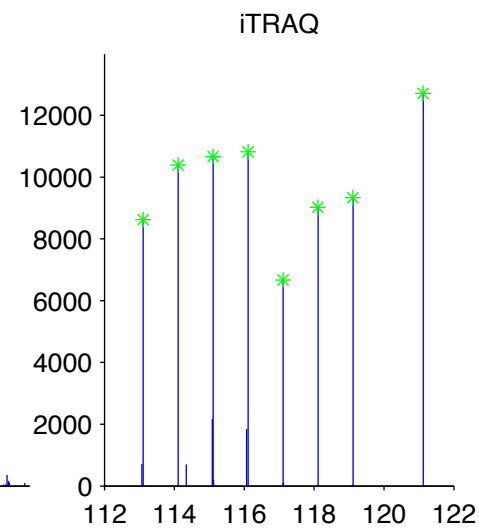

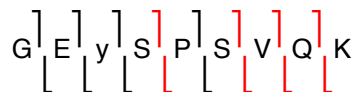

urate oxidase

Charge State: +3

Scan Number: 3868

File Name: 091130ptp1blivers\_hfd\_basal2.raw

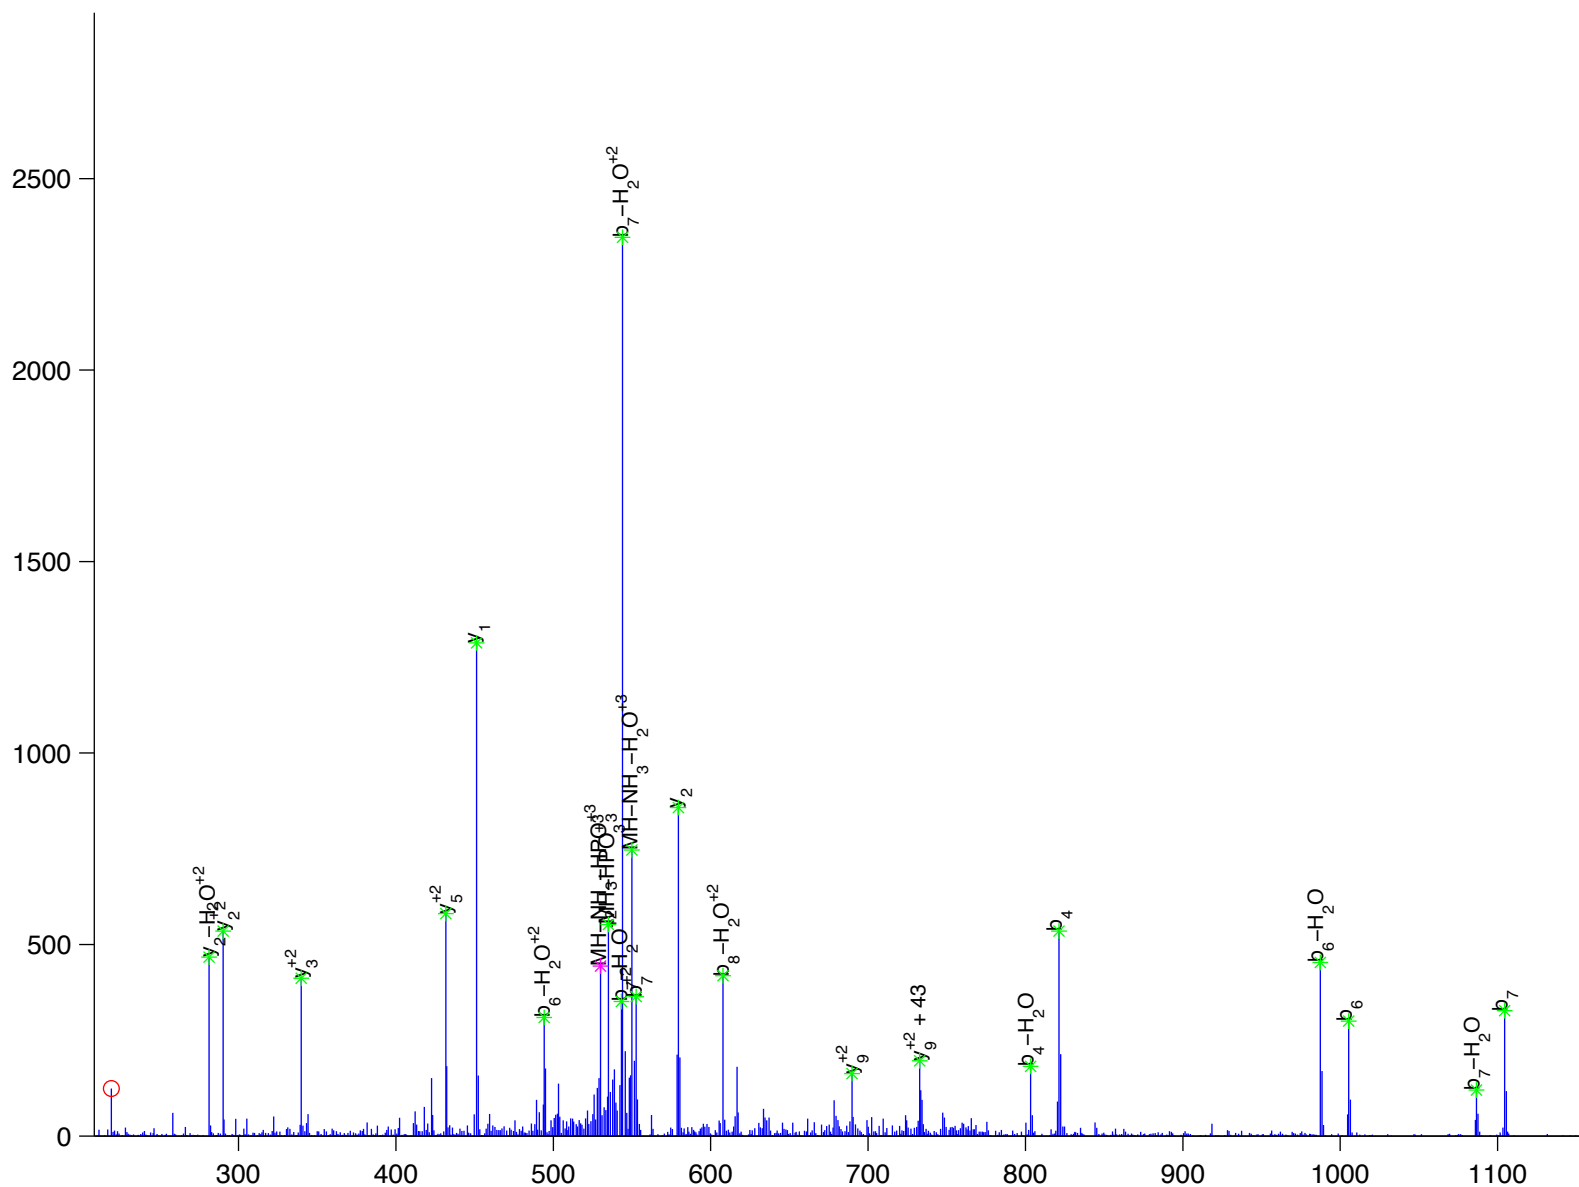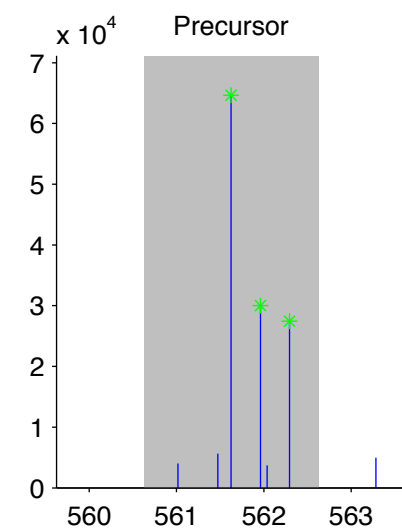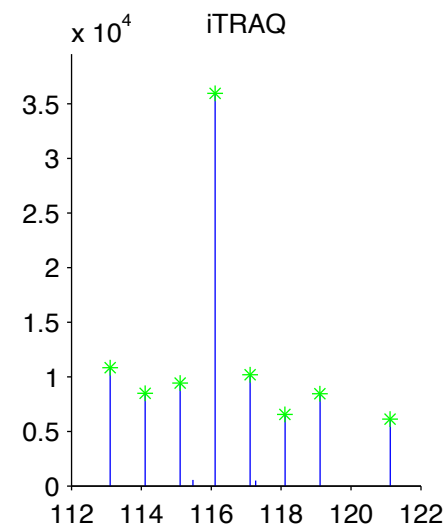

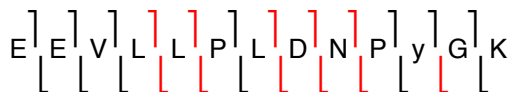

urate oxidase

Charge State: +3

Scan Number: 5875

File Name: 100905ptp1blivers\_ncHFD\_basal.raw

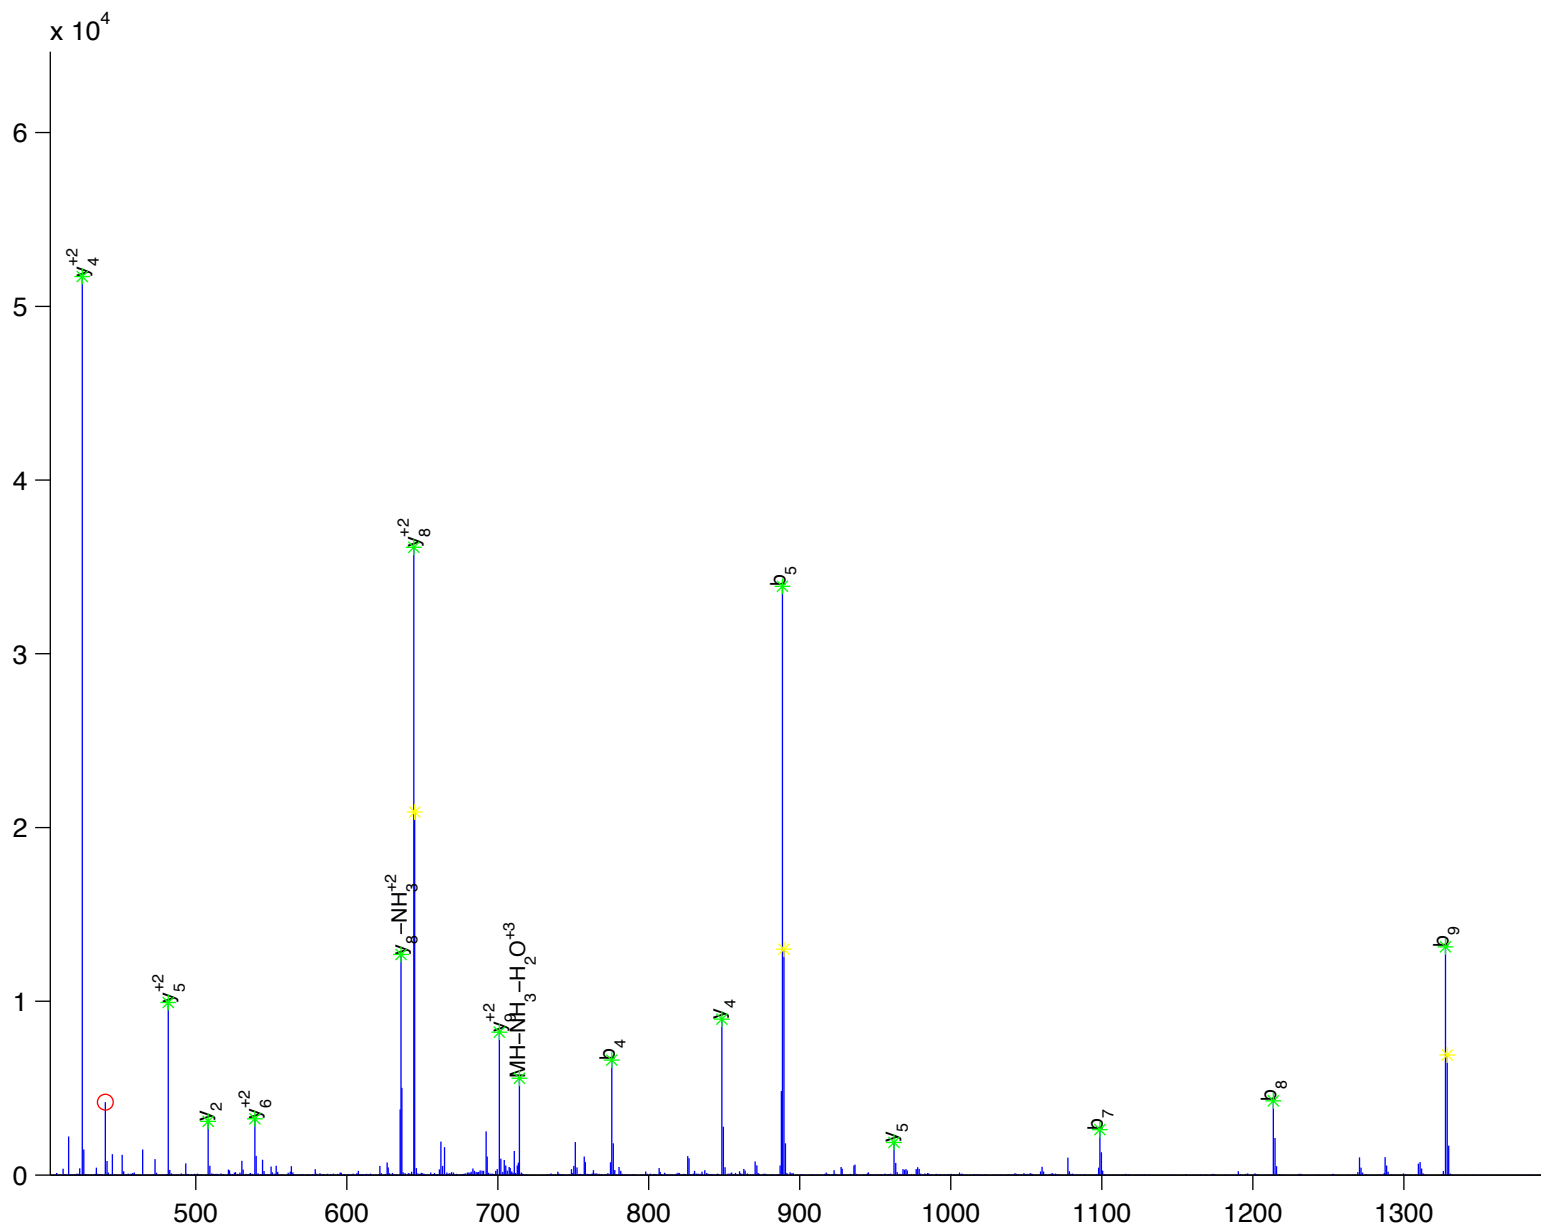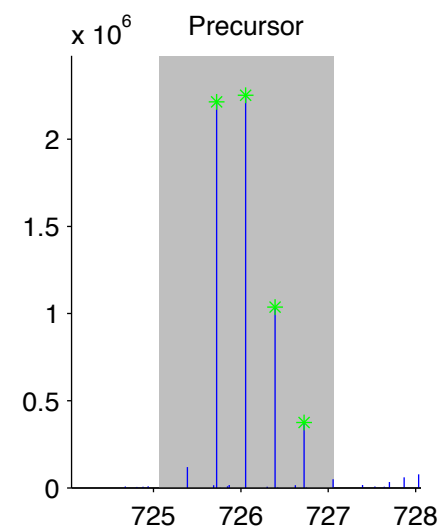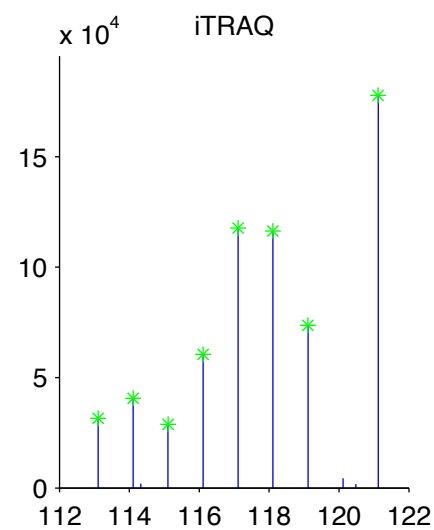



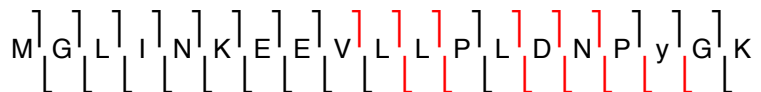

urate oxidase

Charge State: +4

Scan Number: 8735

File Name: 090806ptp1blivers\_M\_NC2.raw

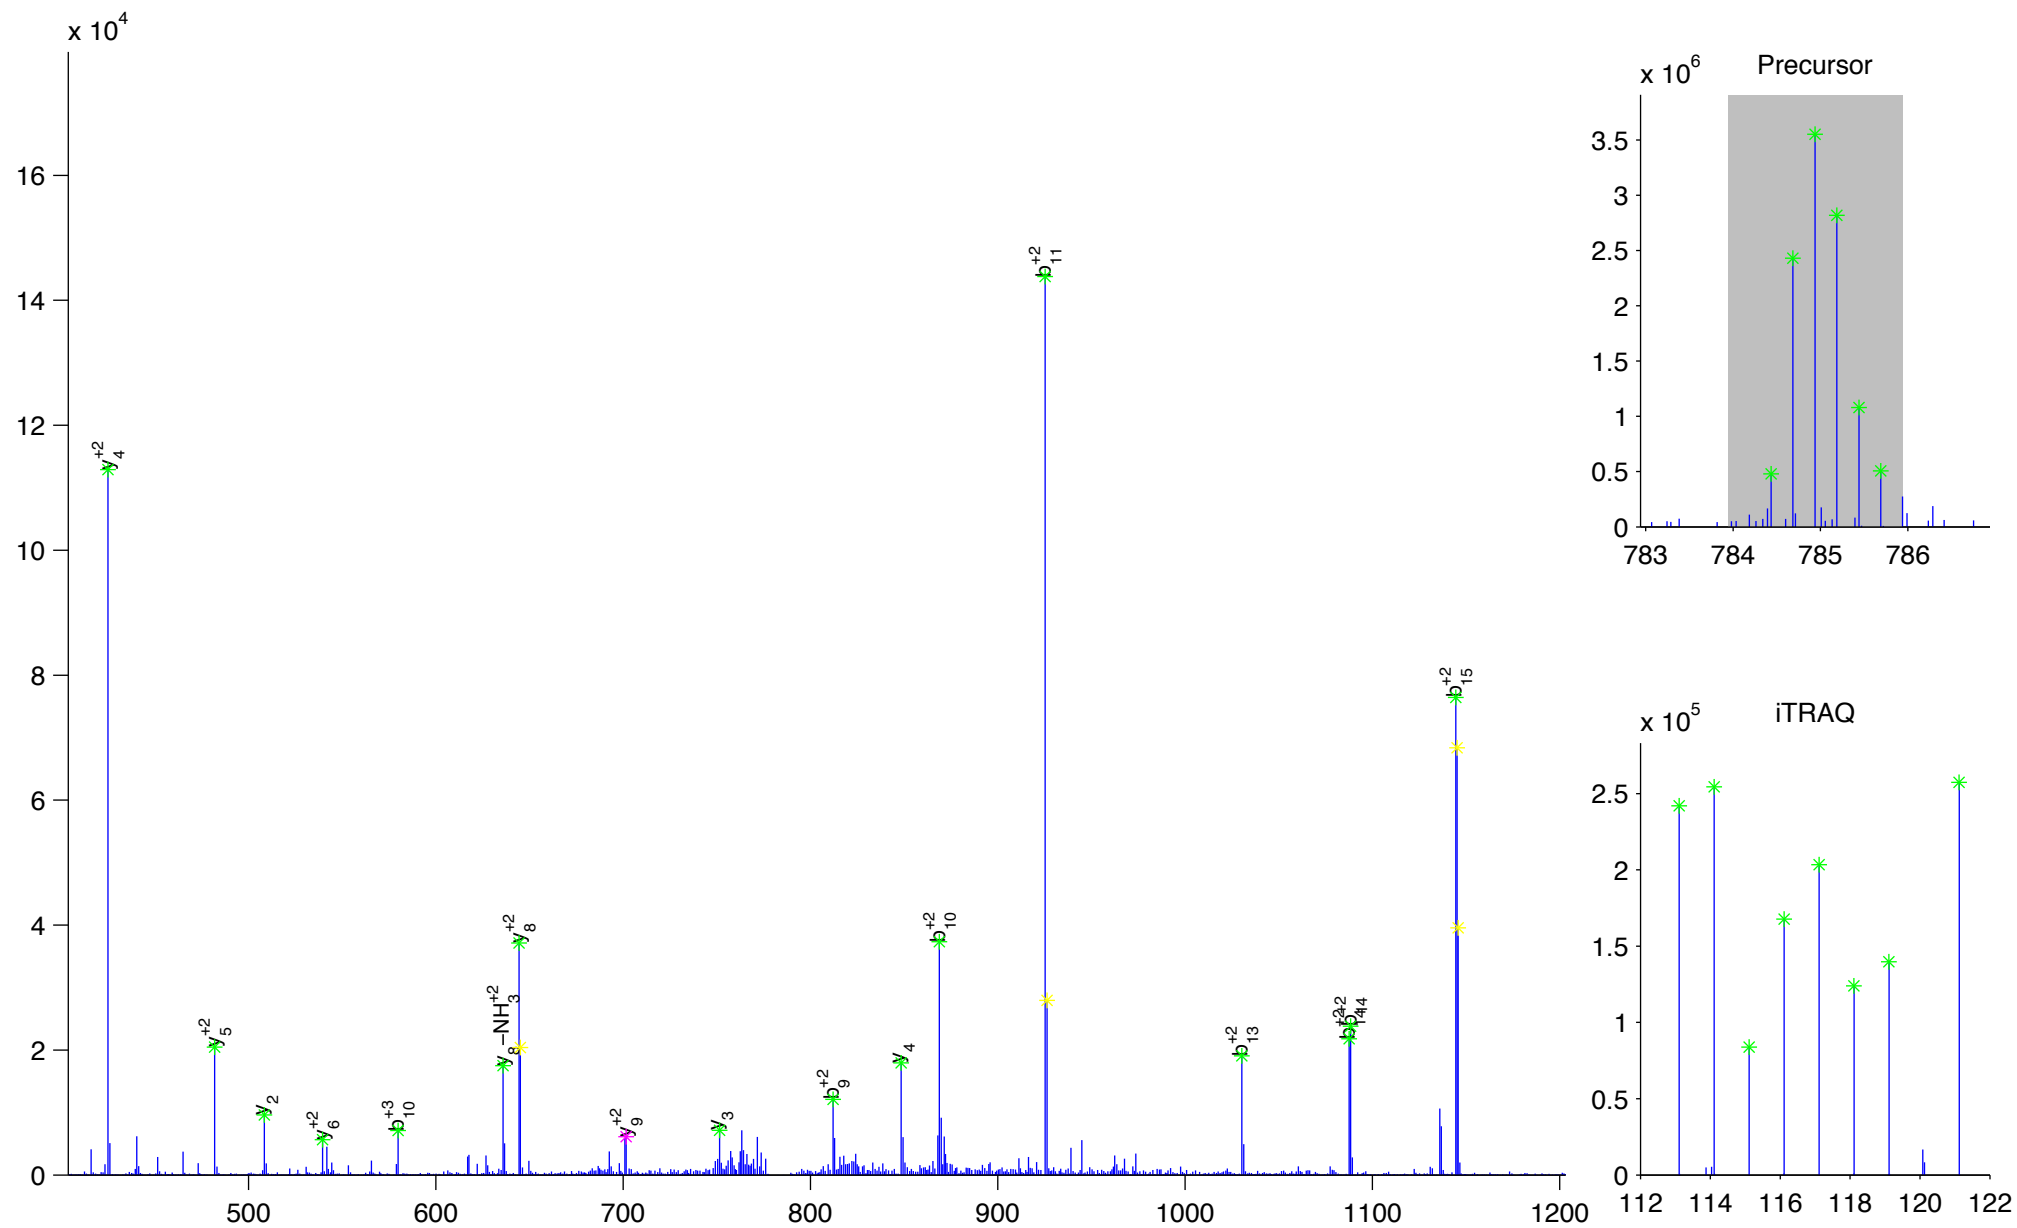

L [ M ] T [ G ] D [ T ] y [ T ] A [ H ] A [ G ] A [ K ]

v-abl Abelson murine leukemia oncogene 1

Charge State: +3

Scan Number: 4374

File Name: 091130ptp1blivers\_hfd\_basal2.raw

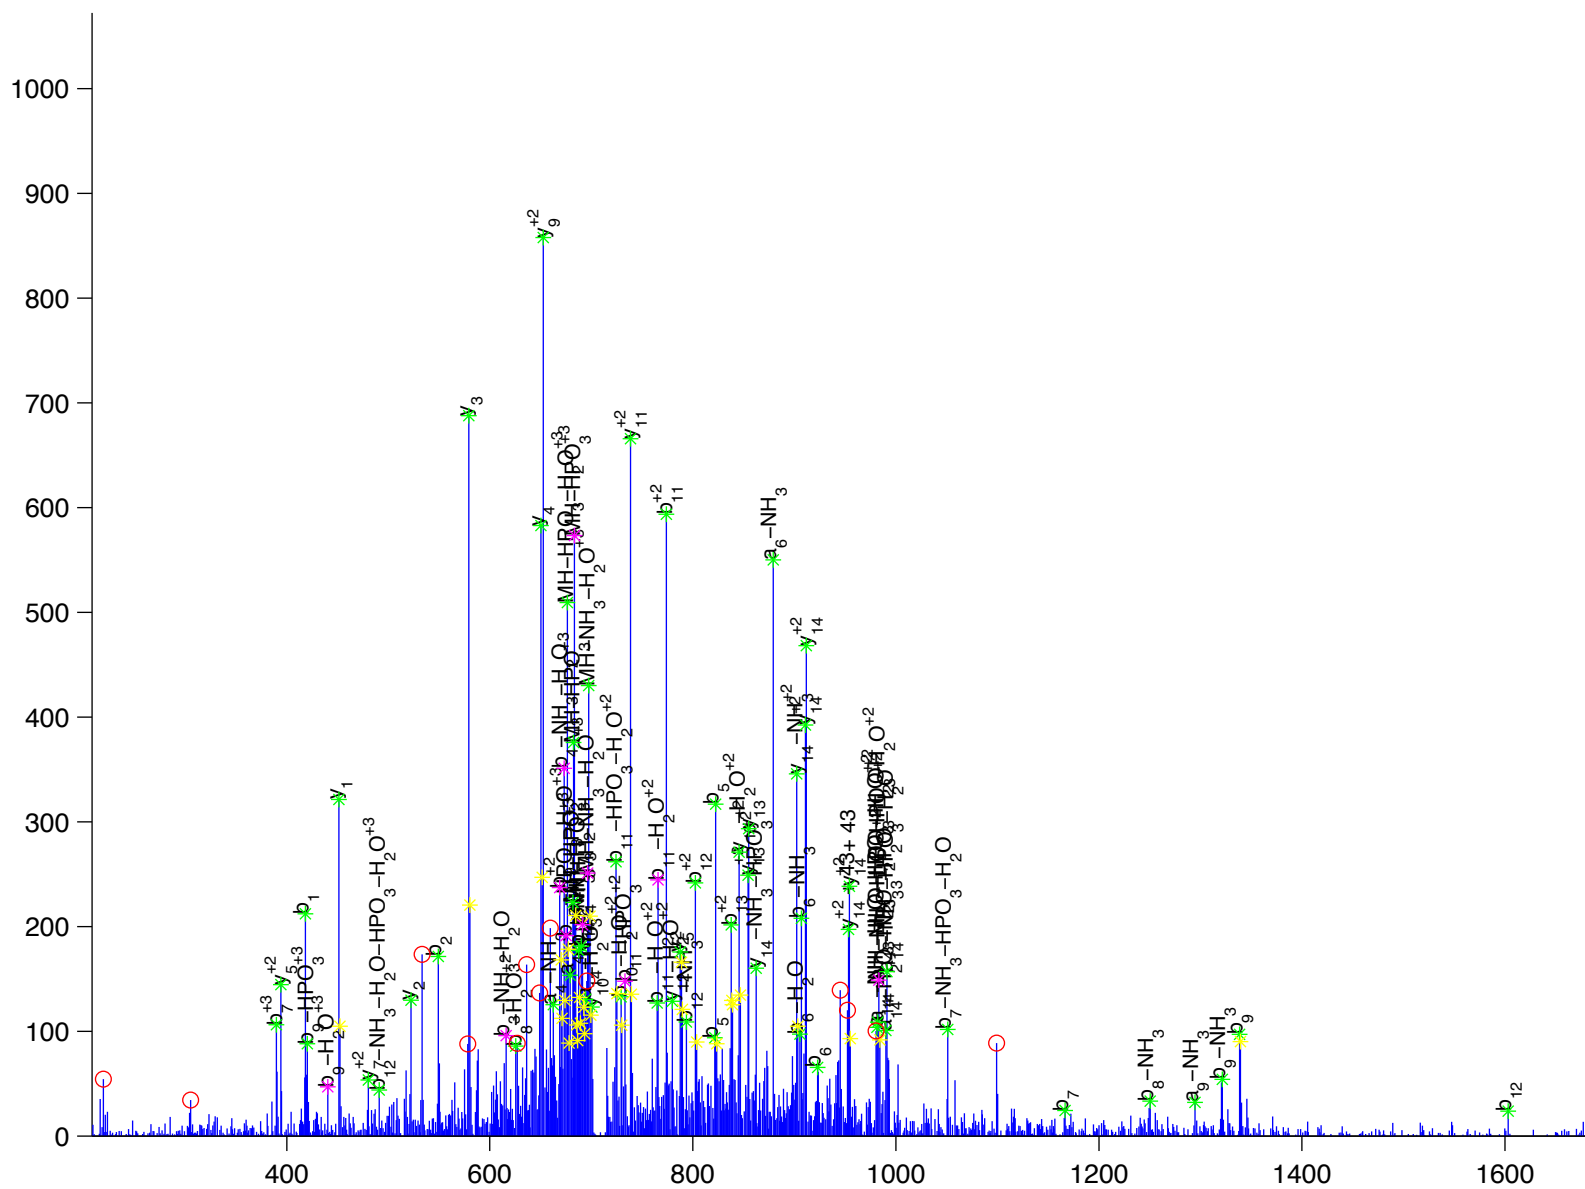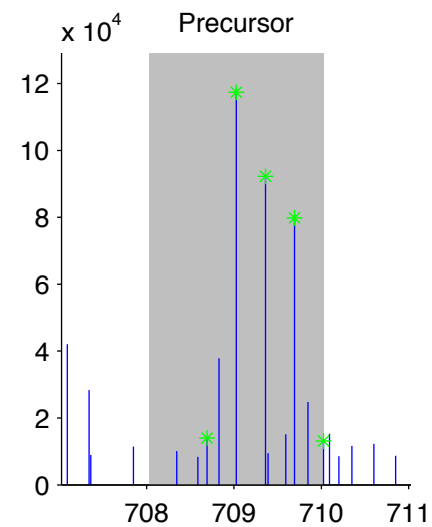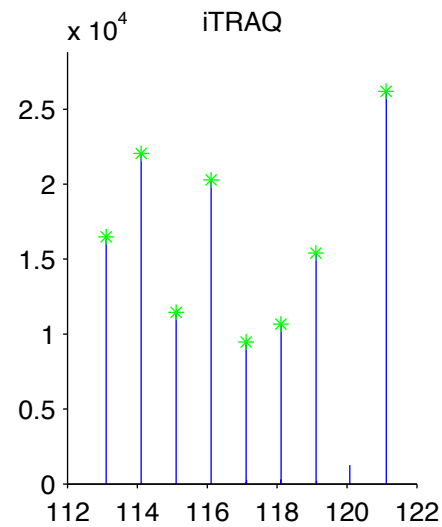

V [ P ] N [ A ] y [ D ] K [ T ] A [ L ] A [ L ] E [ V ] G [ E ] L [ V ] K

v-crk sarcoma virus CT10 oncogene homolog

Charge State: +4

Scan Number: 8833

File Name: 090806ptp1blivers\_M\_NC2.raw

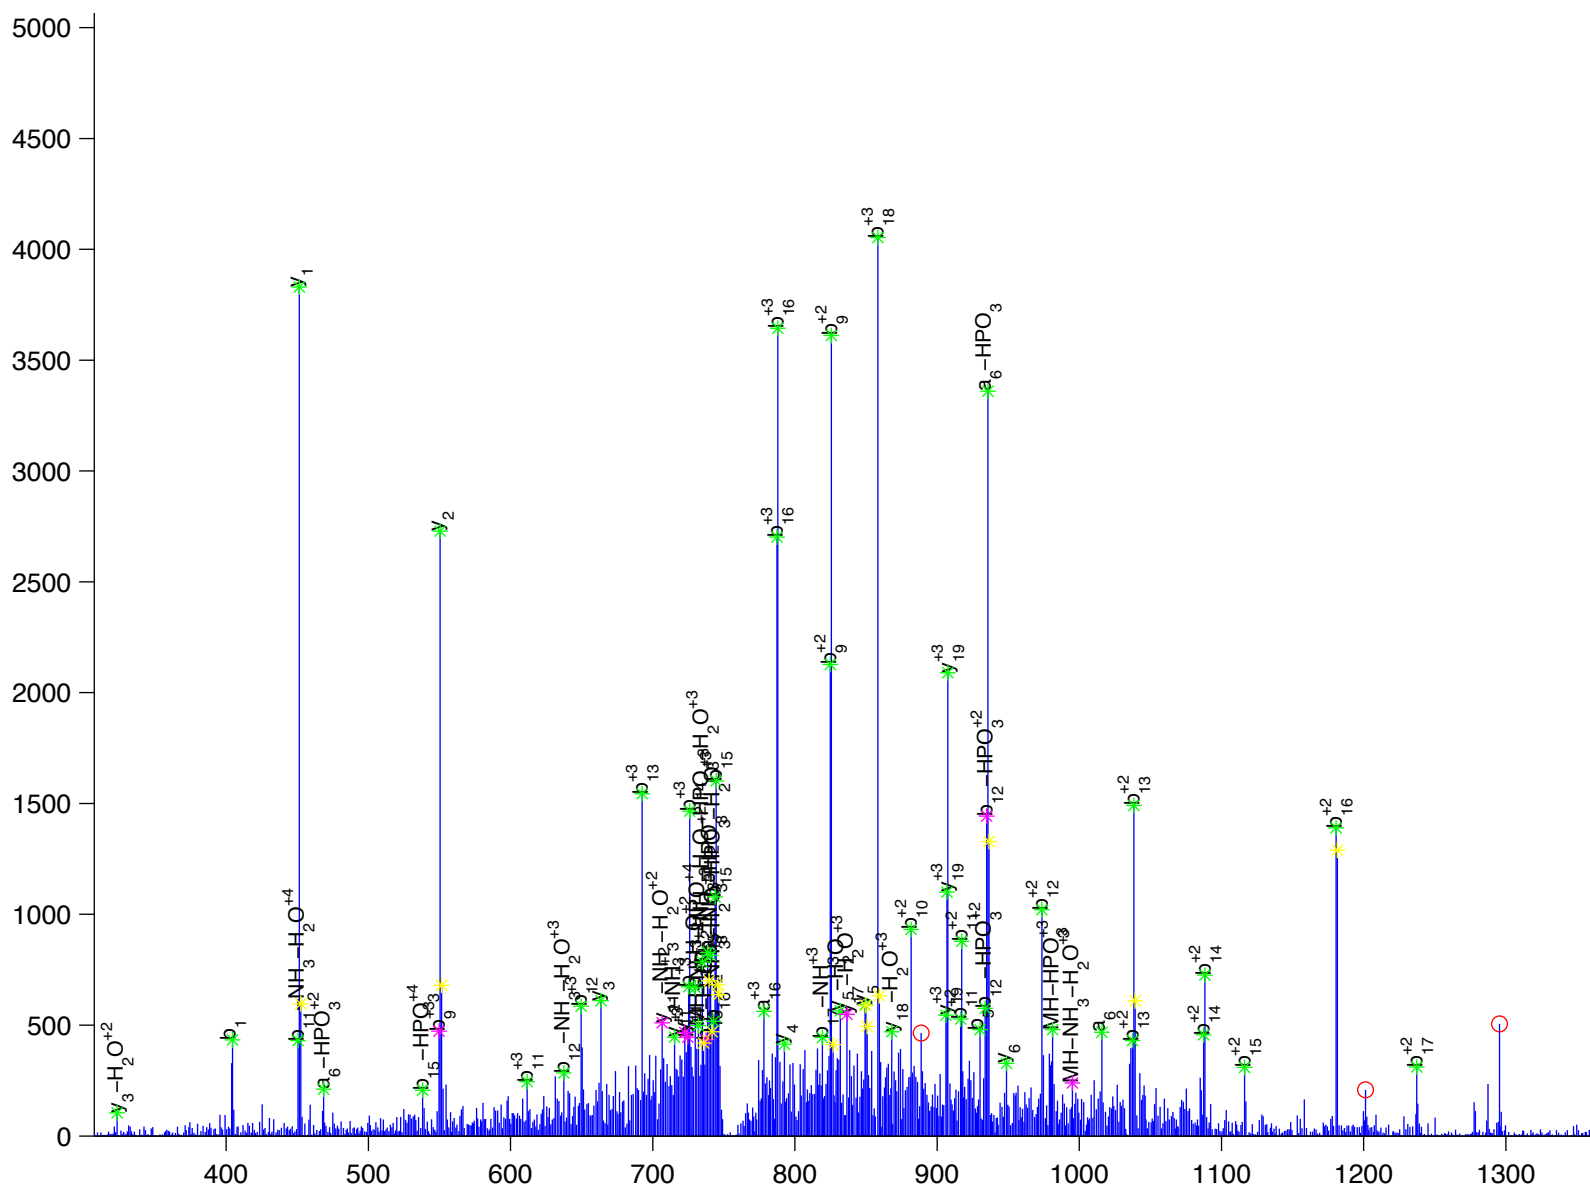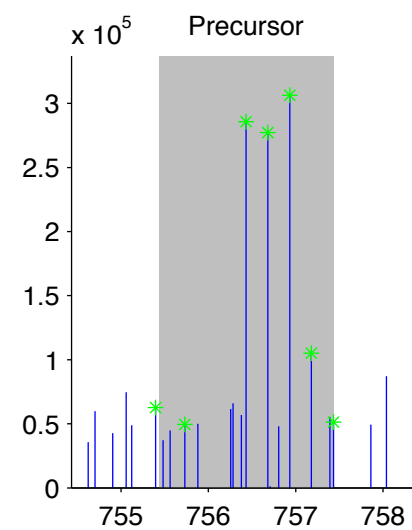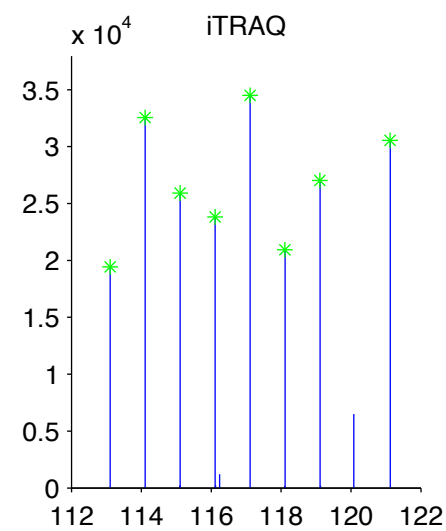

T L y D F P G N D A E D L P F K

v-crk sarcoma virus CT10 oncogene homolog (avian)-like

Charge State: +4

Scan Number: 6108

File Name: 100905ptp1blivers\_ncHFD\_basal.raw

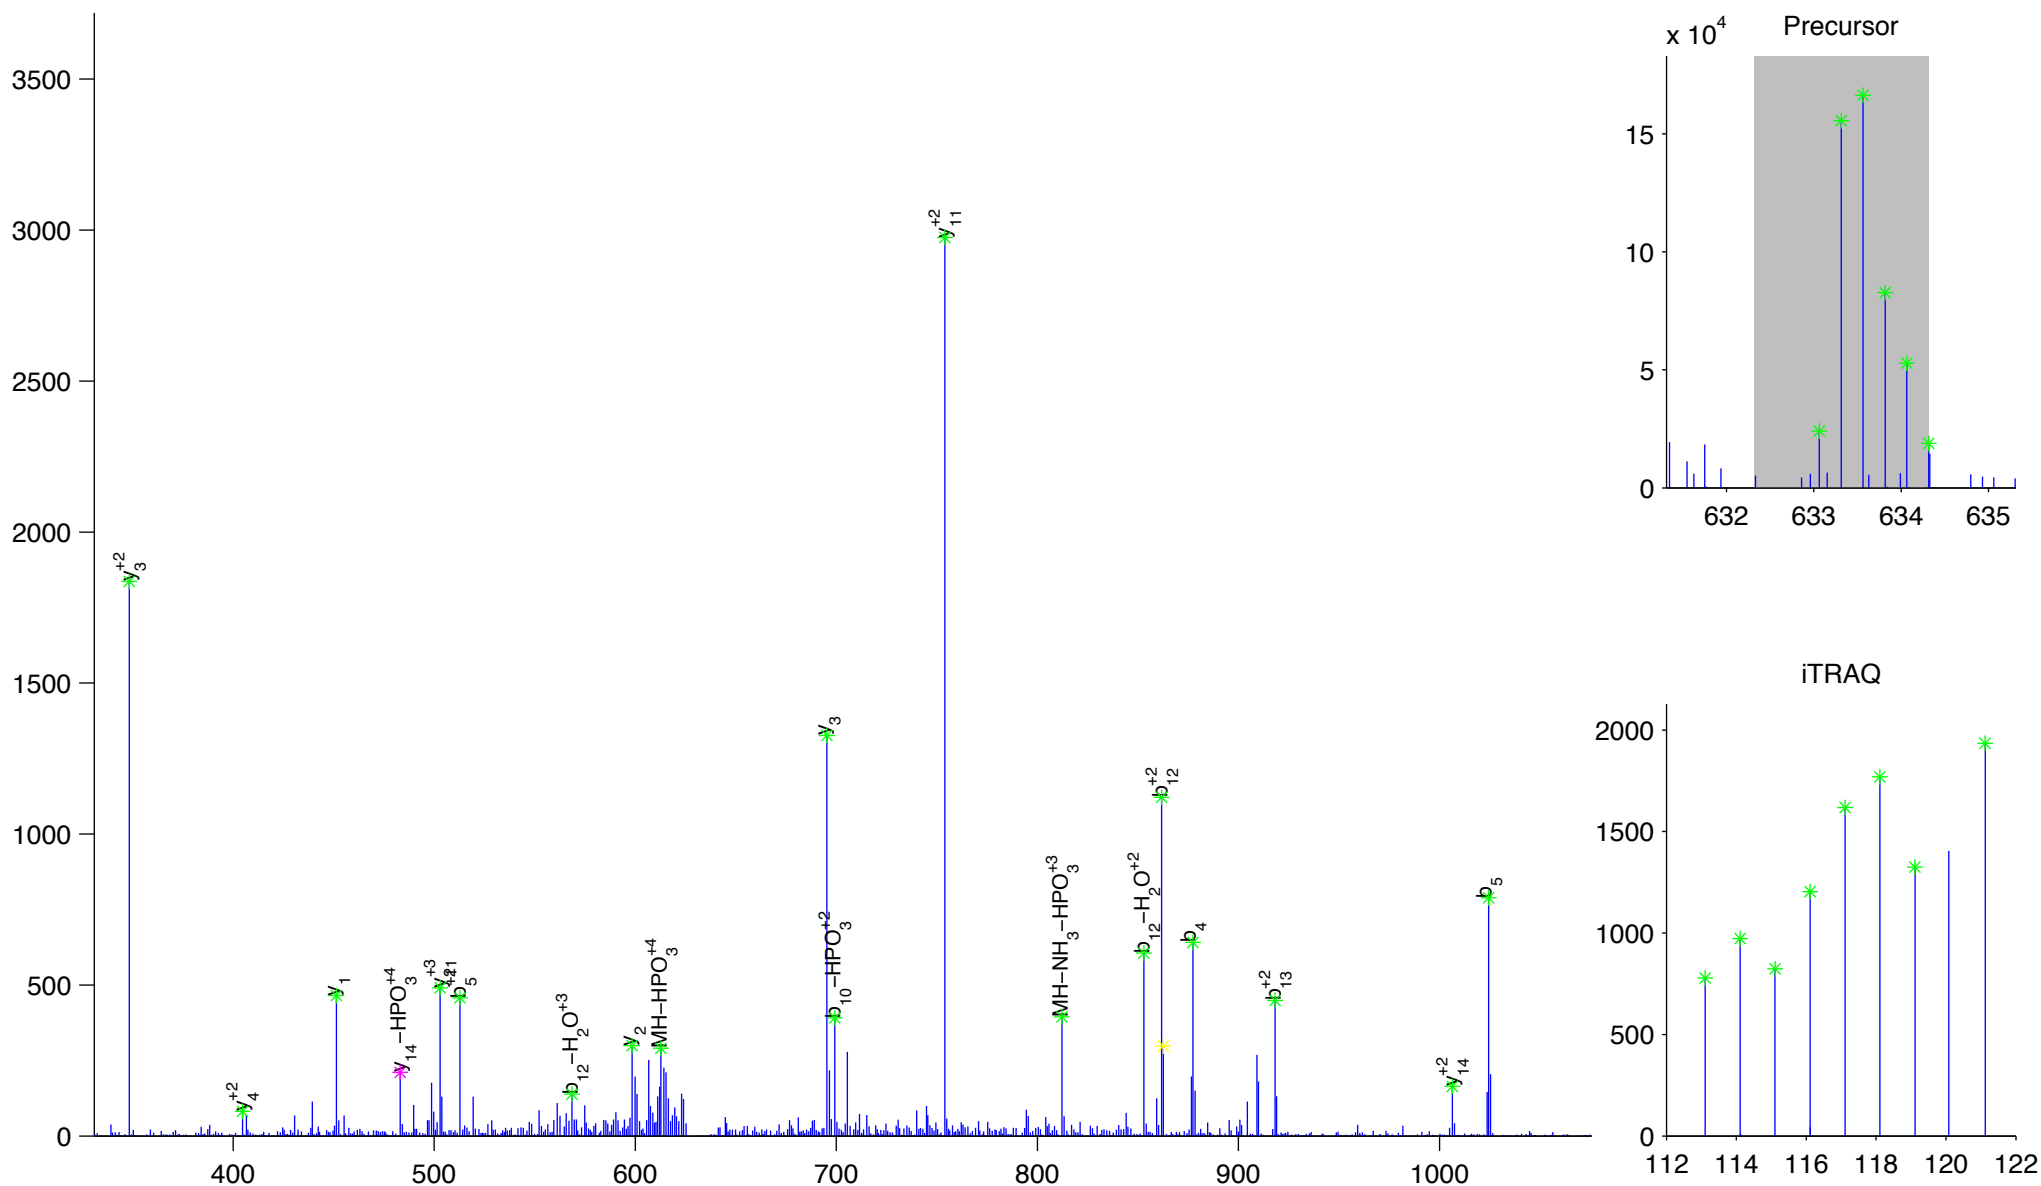

N[S]N[S]y[G]I[P]E[P]A[H]A[Y]A[Q]P[Q]T[T]T[P]L[P]T[V]A[S]T[P]G[A]A[I]N[P]L[P]S[T]Q[N]G[P]V[F]A[K]

v-crk sarcoma virus CT10 oncogene homolog (avian)-like

Charge State: +5

Scan Number: 7165

File Name: 091130ptp1blivers\_hfd\_basal2.raw

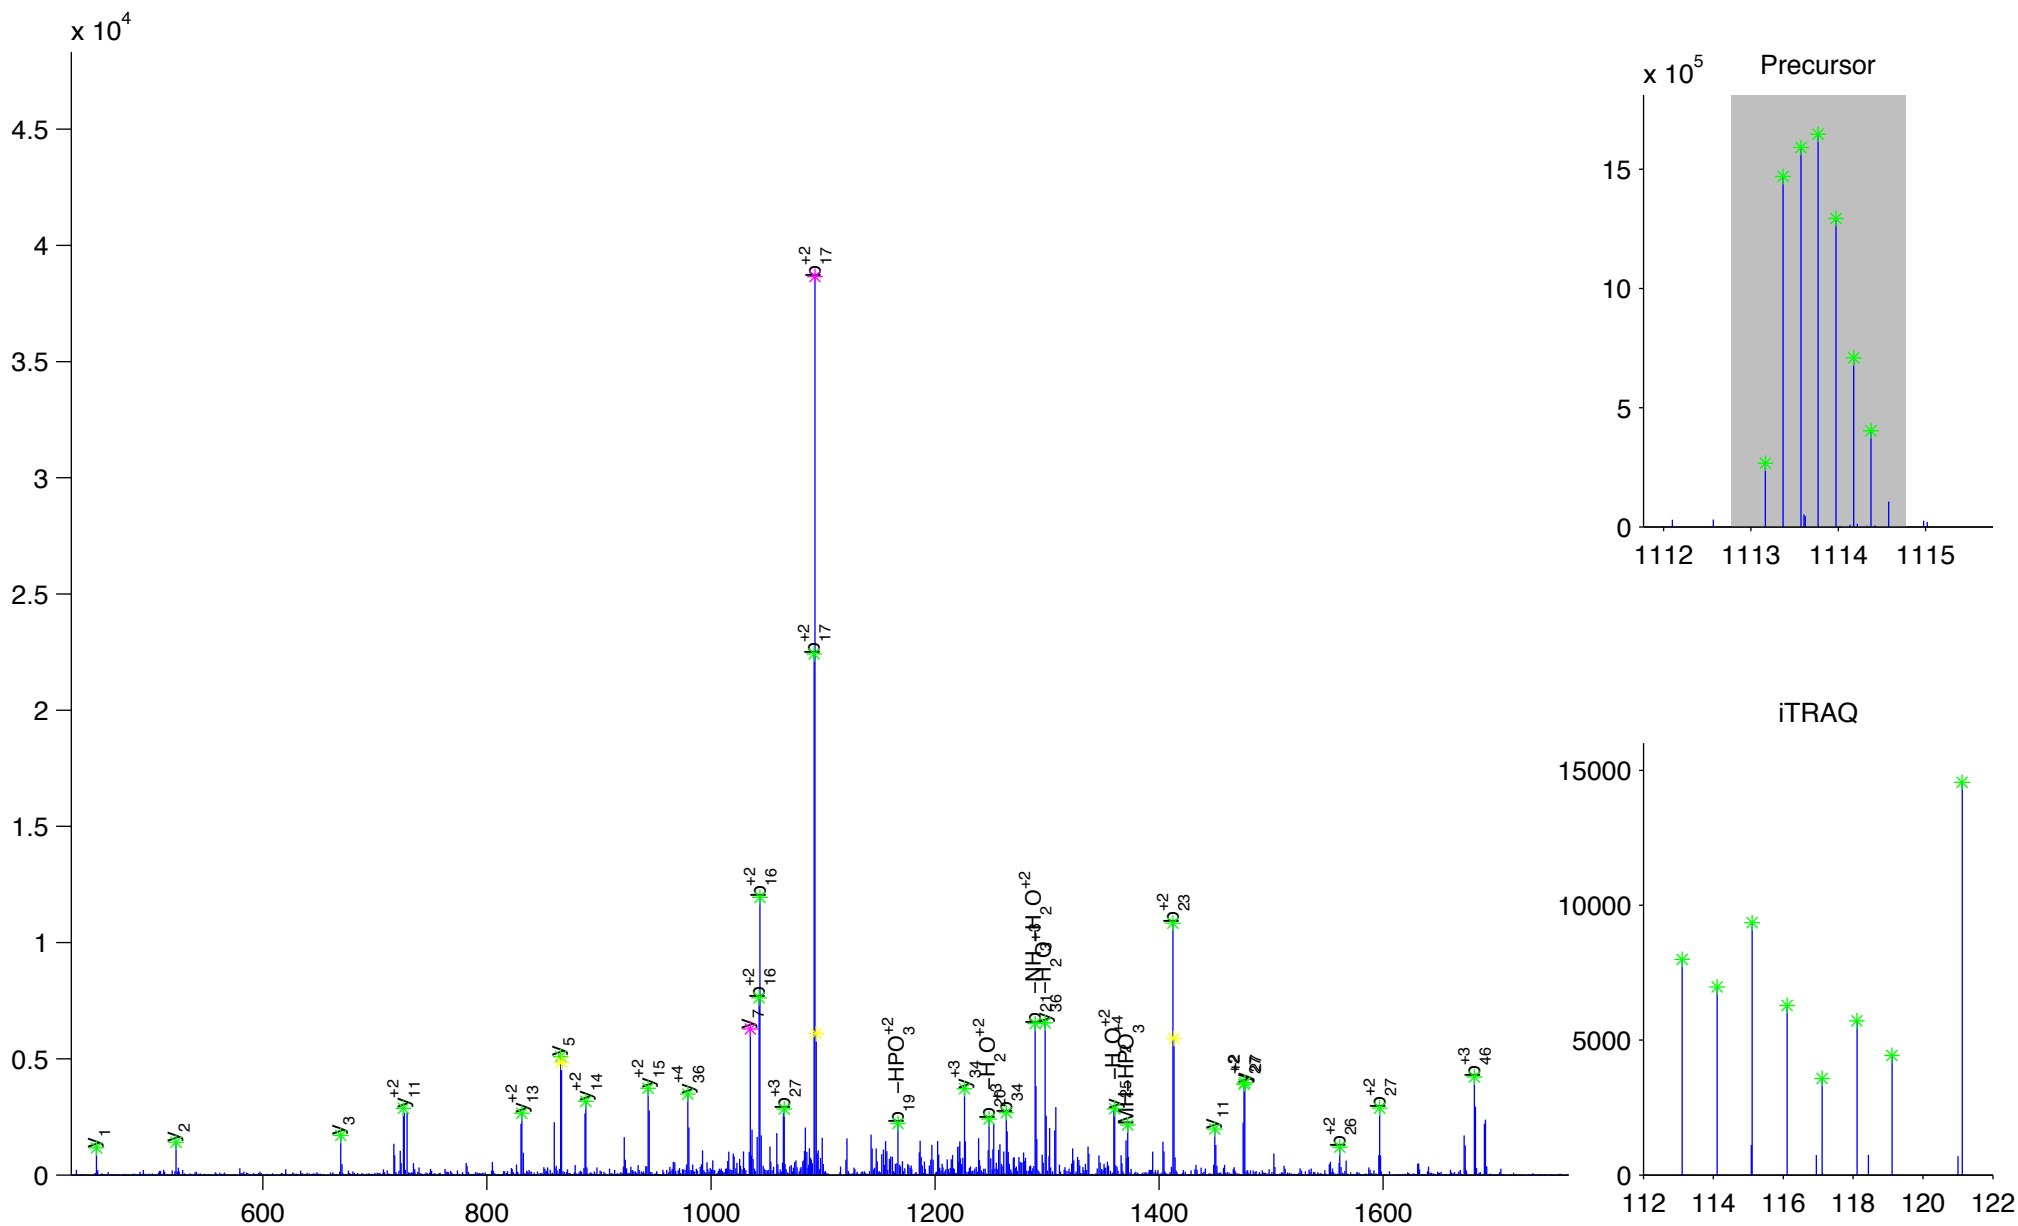

S L E A T D S A F D N P D y W H S R

v-erb-b2 erythroblastic leukemia viral oncogene homolog 3

Charge State: +3

Scan Number: 6081

File Name: 091130ptp1blivers\_hfd\_basal2.raw

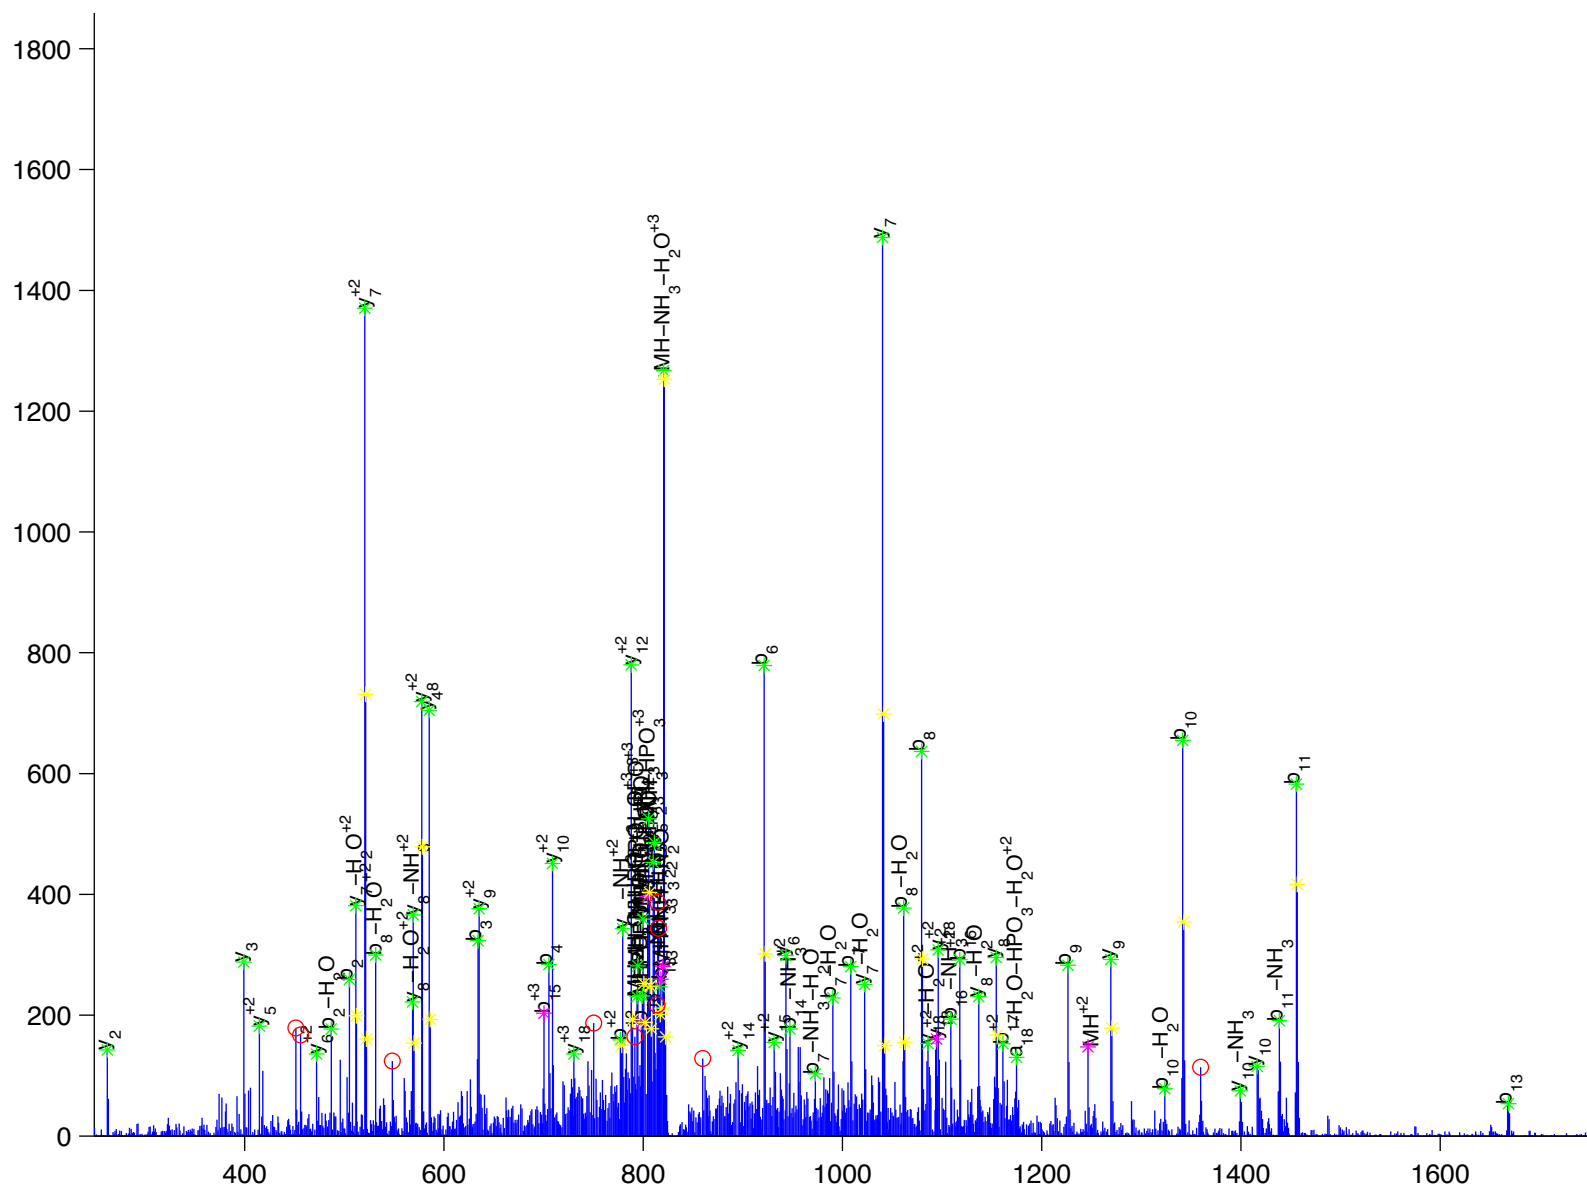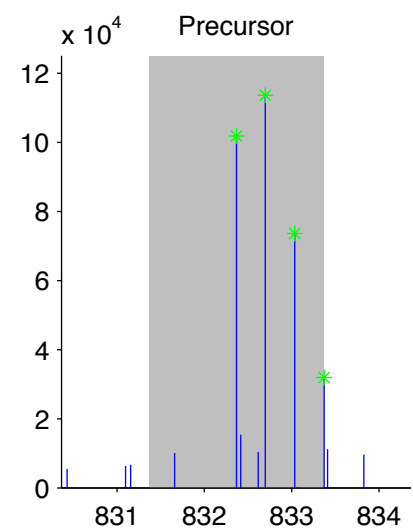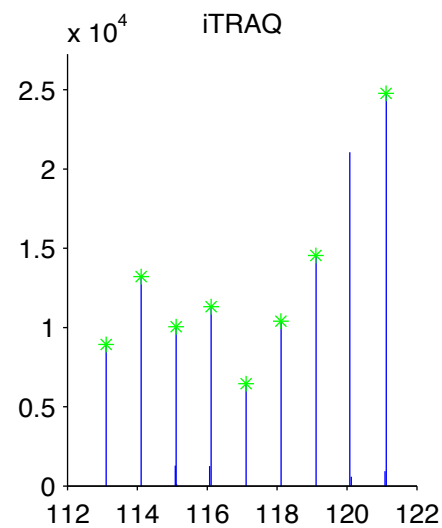

V[V]E[T]D[P]S[P]y[C]I[V]A[P]D[T]V[I]H[C]E[G]E[P]I[K]R

valosin containing protein

Charge State: +4

Scan Number: 7395

File Name: 090807ptp1blivers\_M\_HFD\_basal.raw

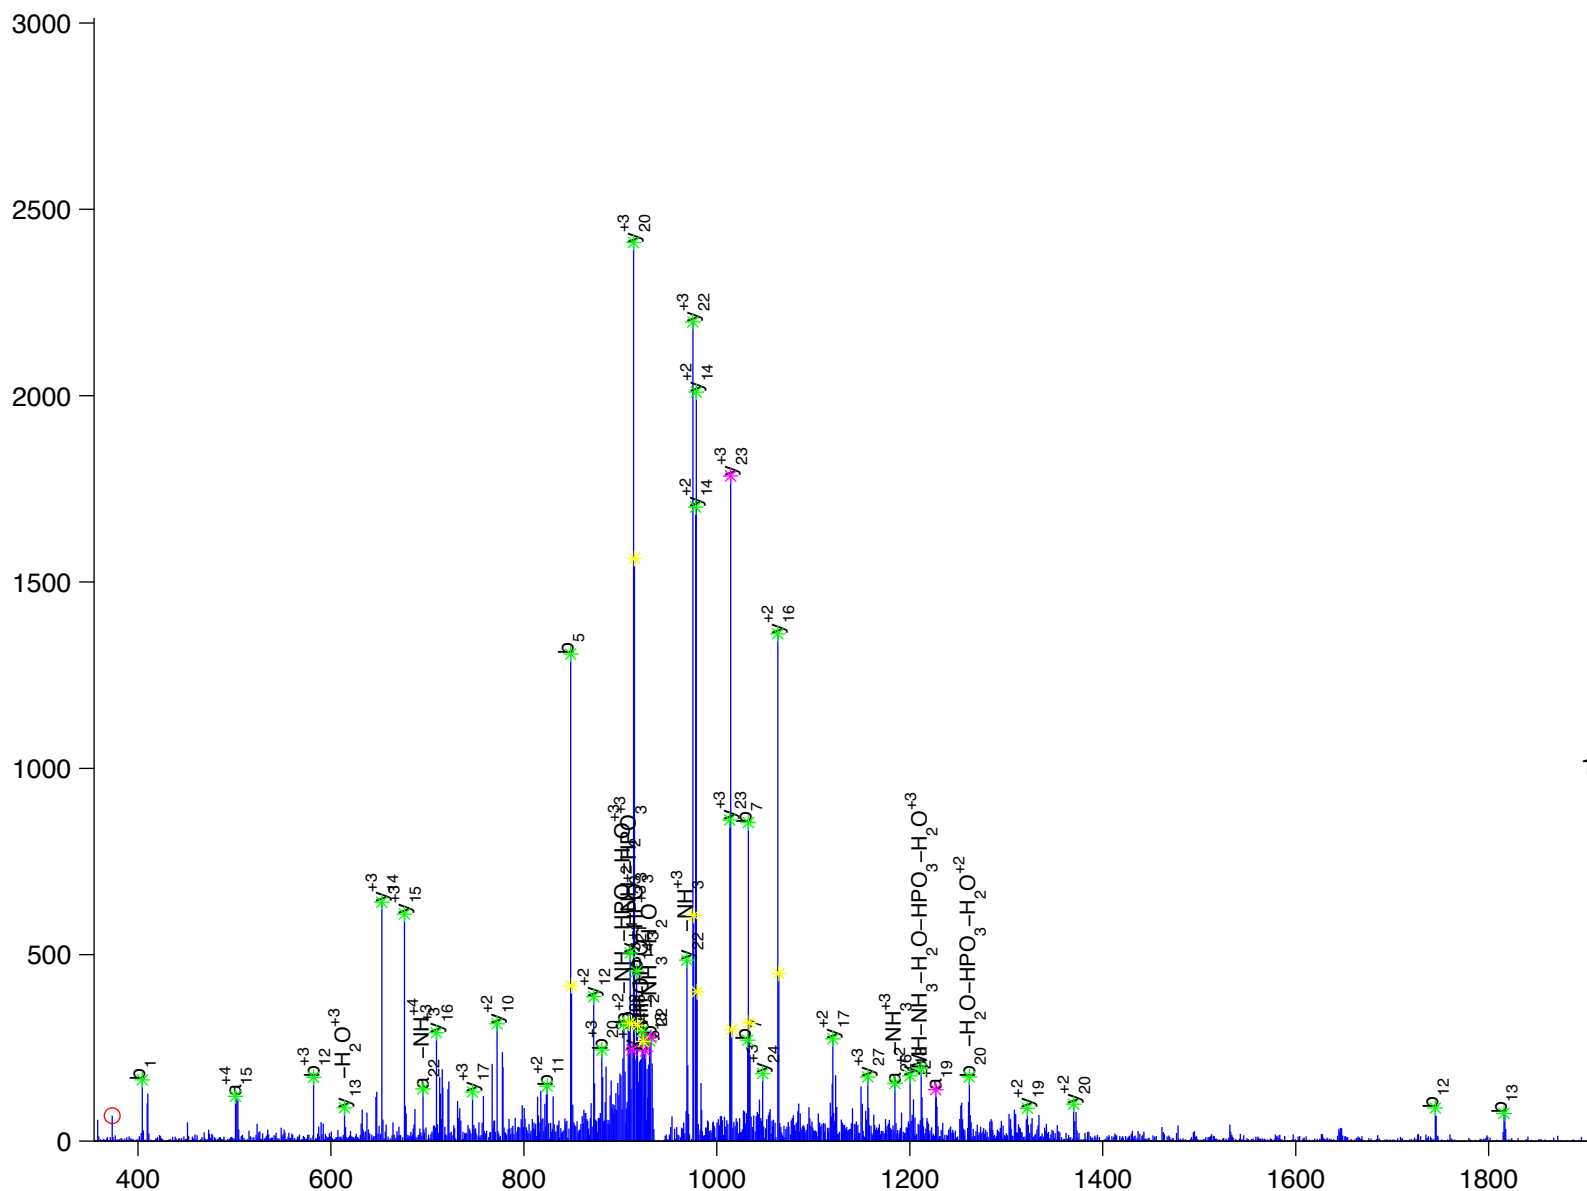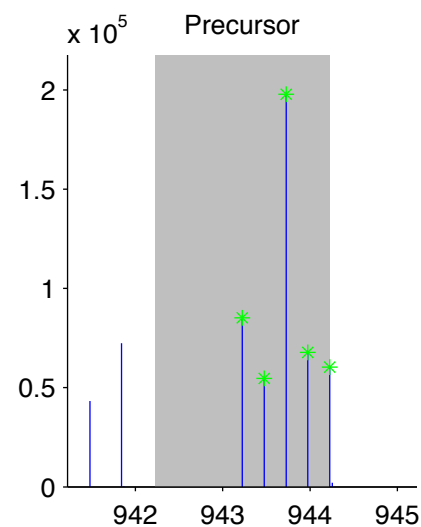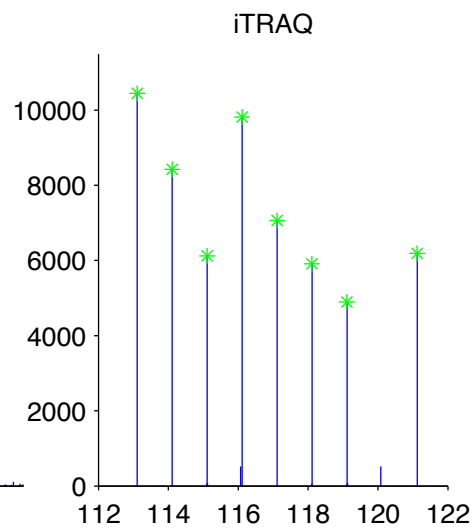

N [ P ] G [ N ] Q [ A ] A [ y ] E [ H ] F [ E ] T [ M ] K

vinculin  
 Charge State: +3  
 Scan Number: 4699  
 File Name: 091130ptp1blivers\_hfd\_basal2.raw

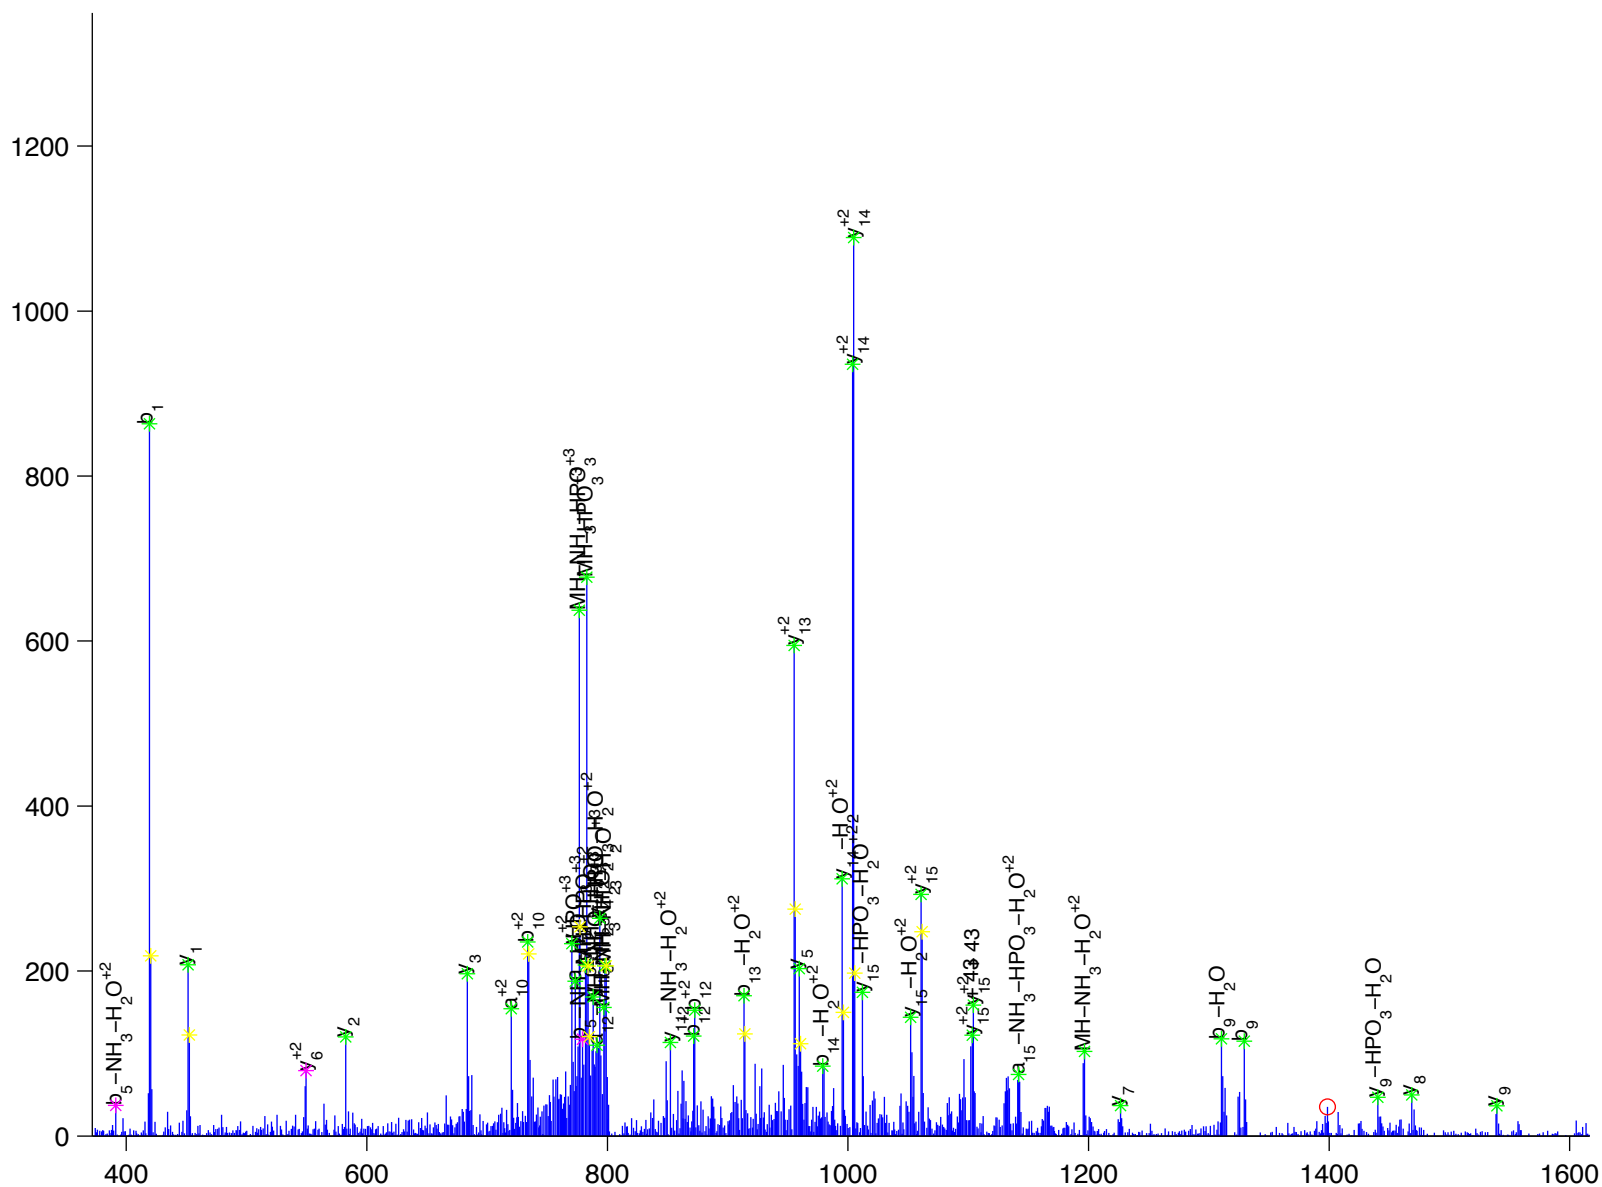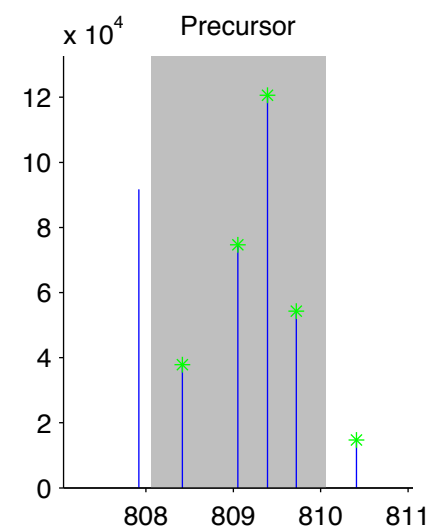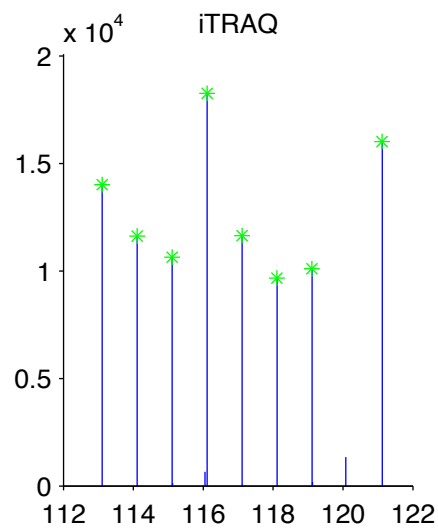



S [ F ] L [ D ] S [ G ] y [ R ]

vinculin

Charge State: +

Scan Number: 5319

File Name: 091130ptp1blivers\_hfd\_basal2.raw

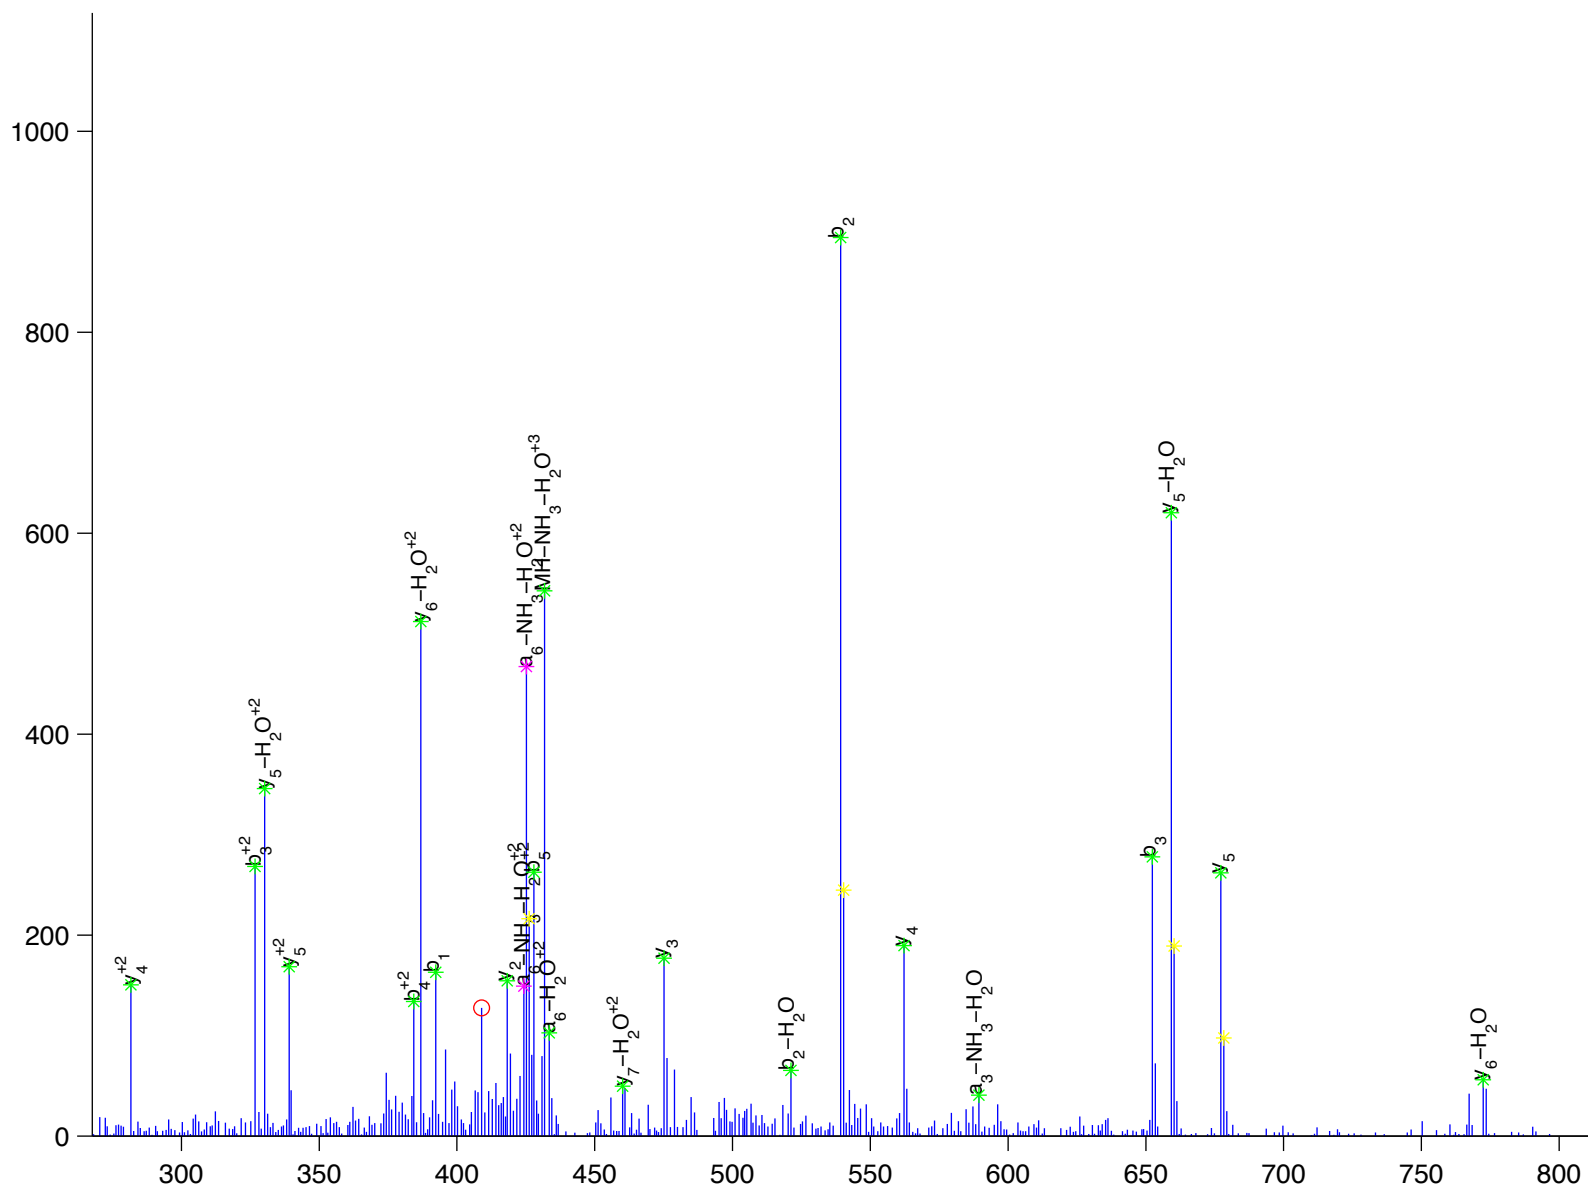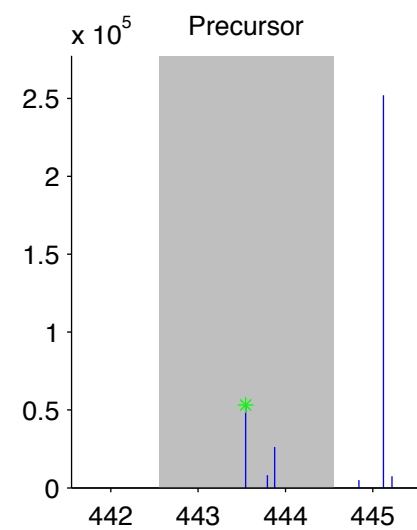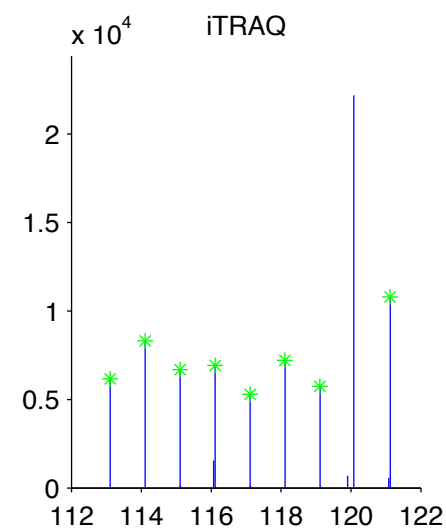

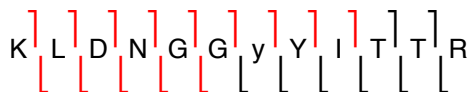

viral oncogene yes homolog

Charge State: +3

Scan Number: 4691

File Name: 091130ptp1blivers\_hfd\_basal2.raw

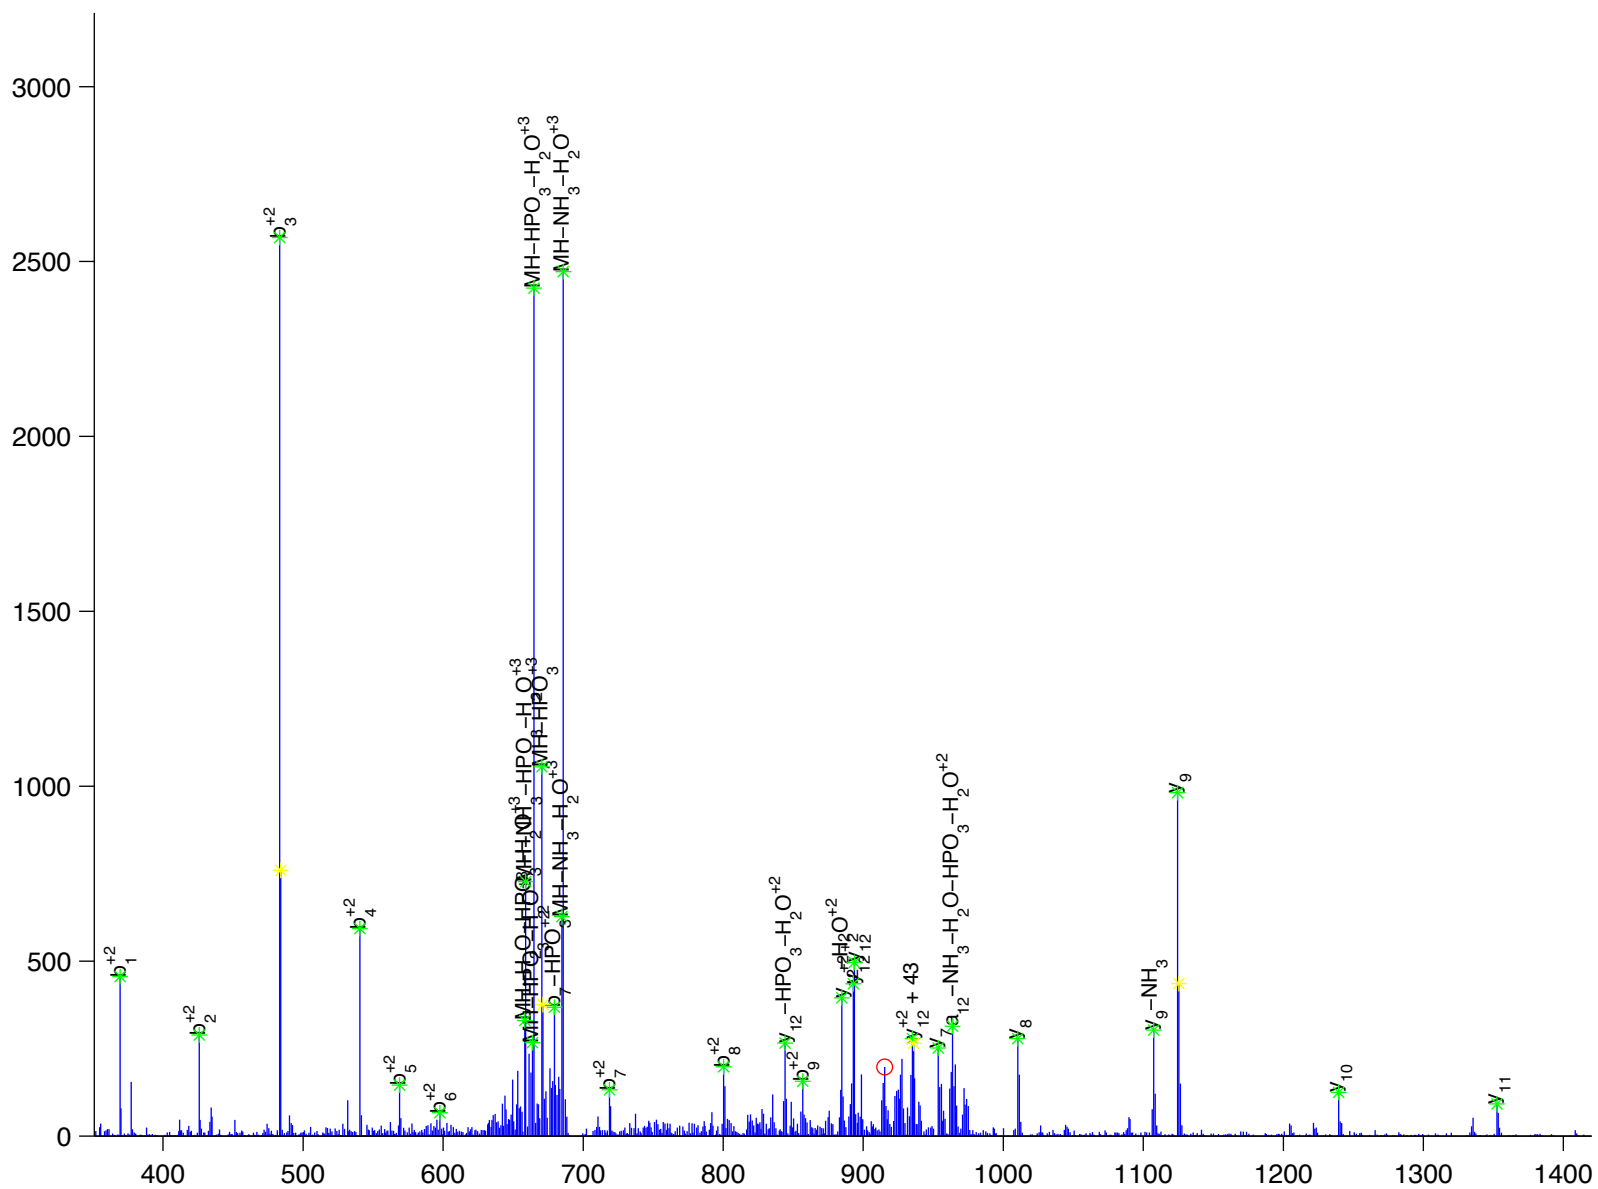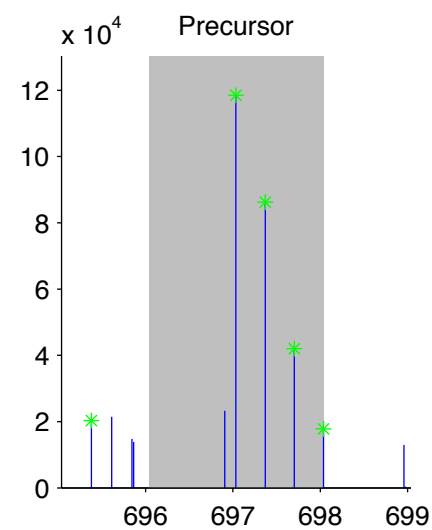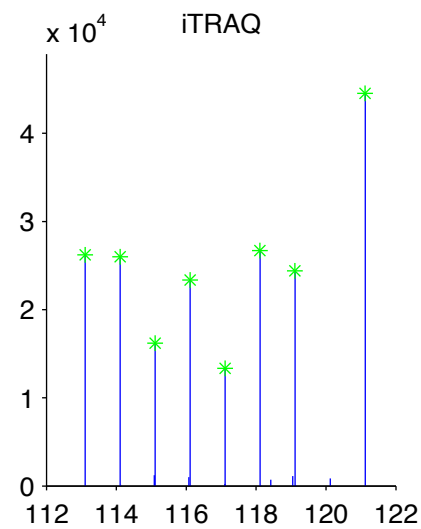

G [ A ] y [ S ] L [ S ] I [ R ]

viral oncogene yes homolog

Charge State: +2

Scan Number: 4707

File Name: HJ072909\_HFD\_E1.raw

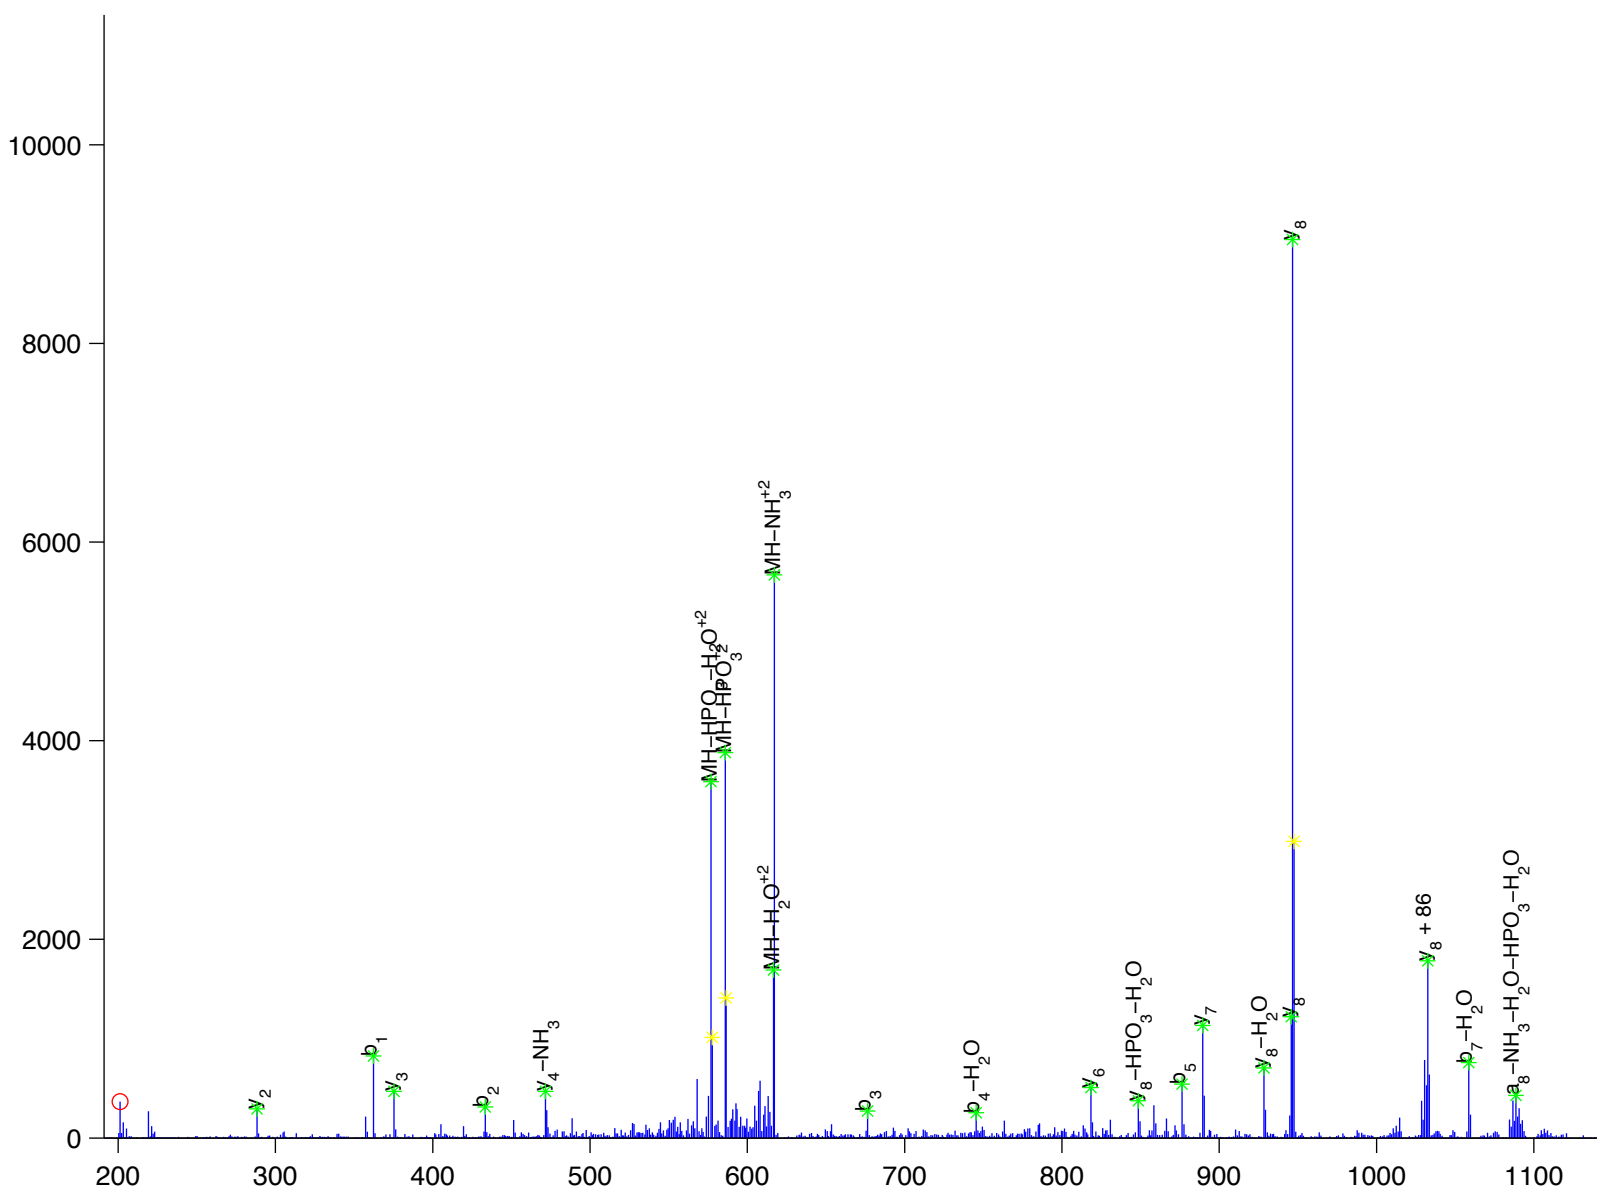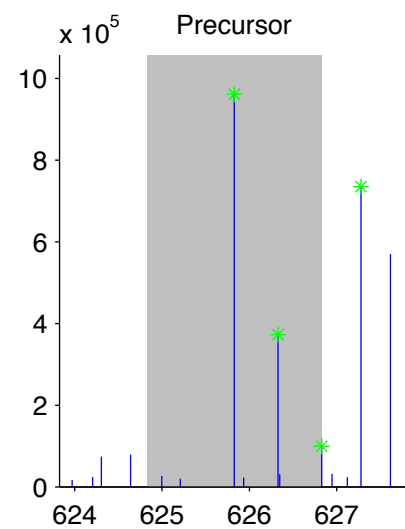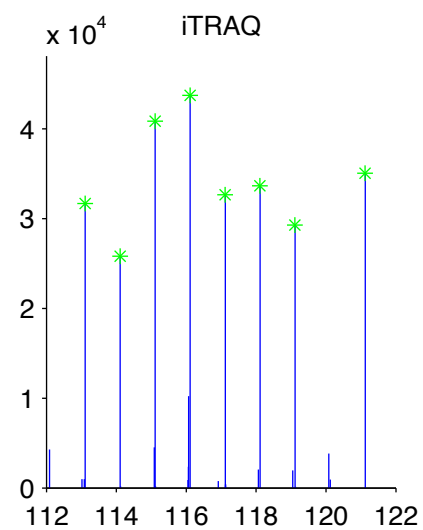

L I E D N E y T A R

viral oncogene yes homolog

Charge State: +2

Scan Number: 5107

File Name: 091130ptp1blivers\_hfd\_basal2.raw

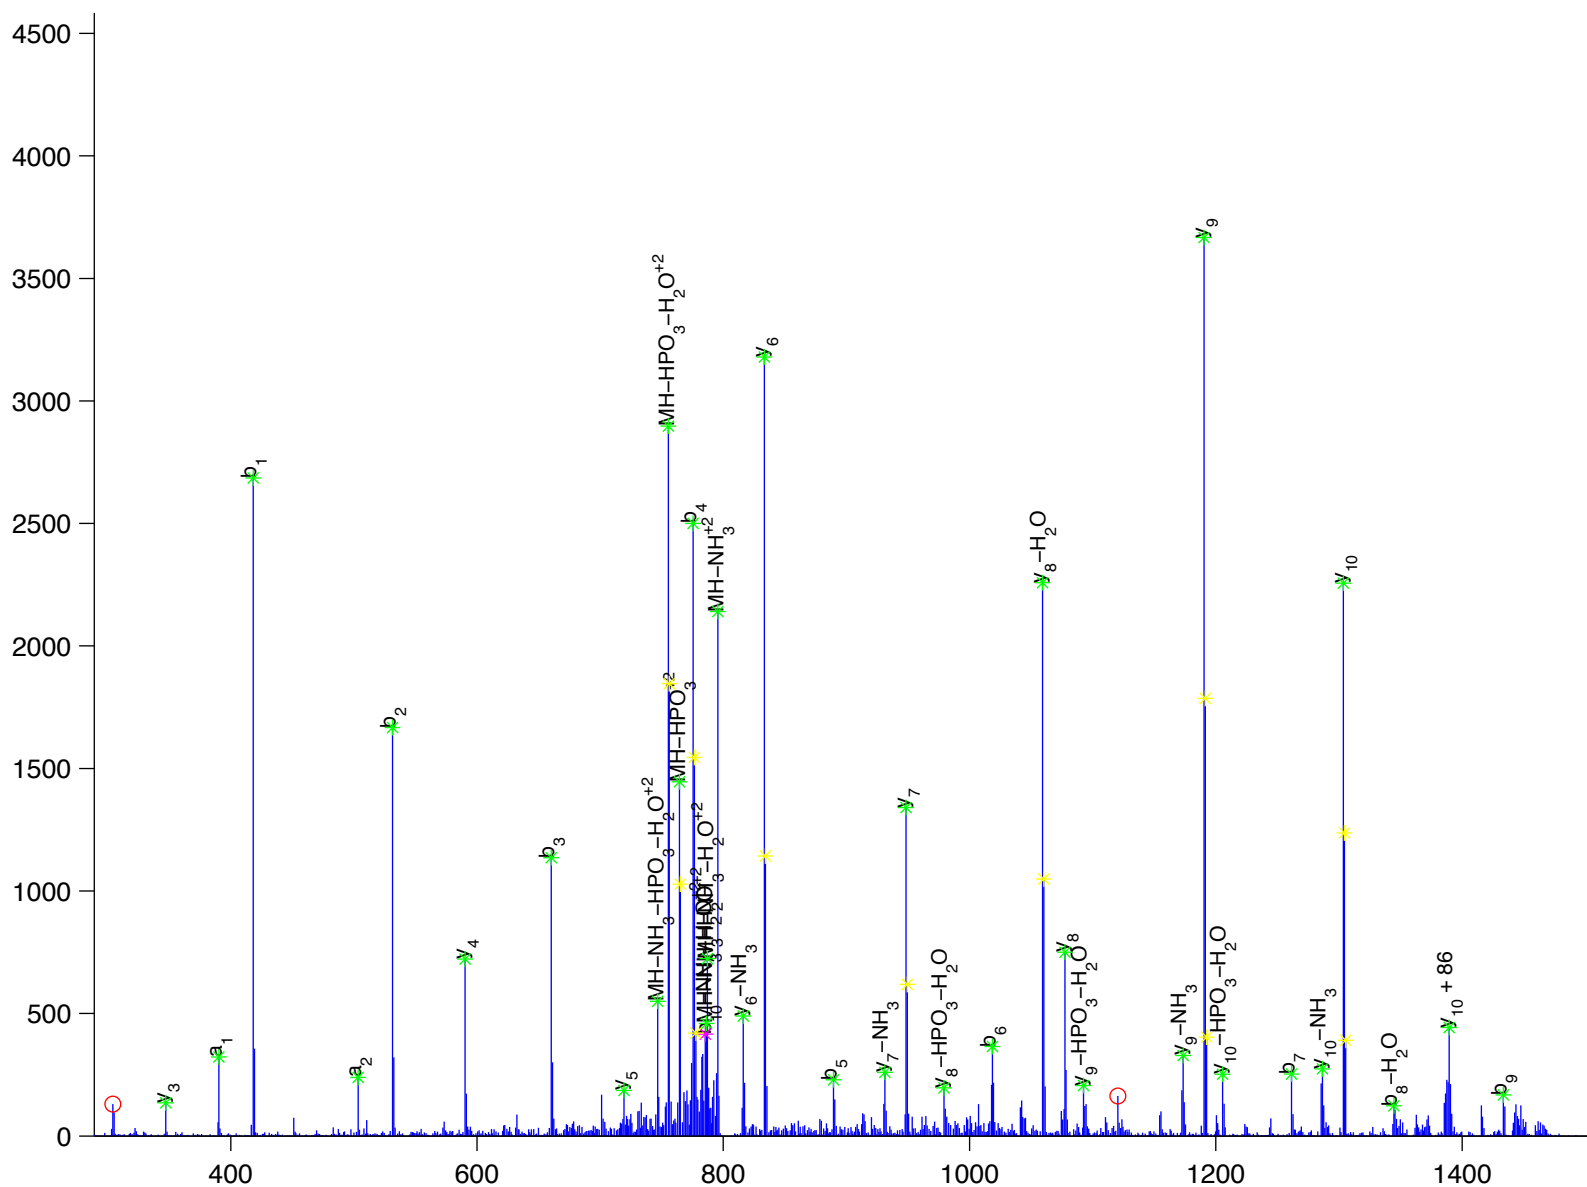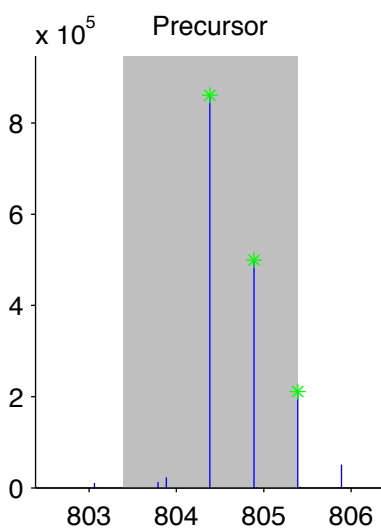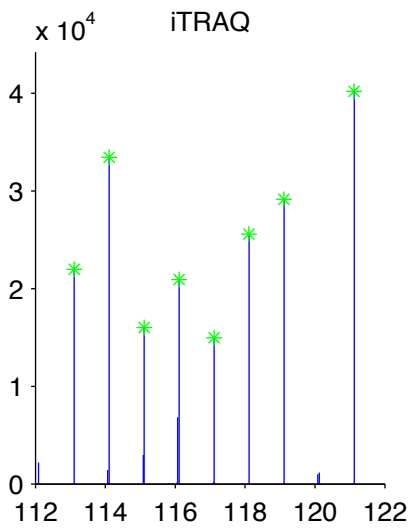

L [ D ] N [ G ] G [ y ] Y [ I ] T [ T ] R

viral oncogene yes homolog

Charge State: +2

Scan Number: 5142

File Name: 090806ptp1blivers\_M\_NC2.raw

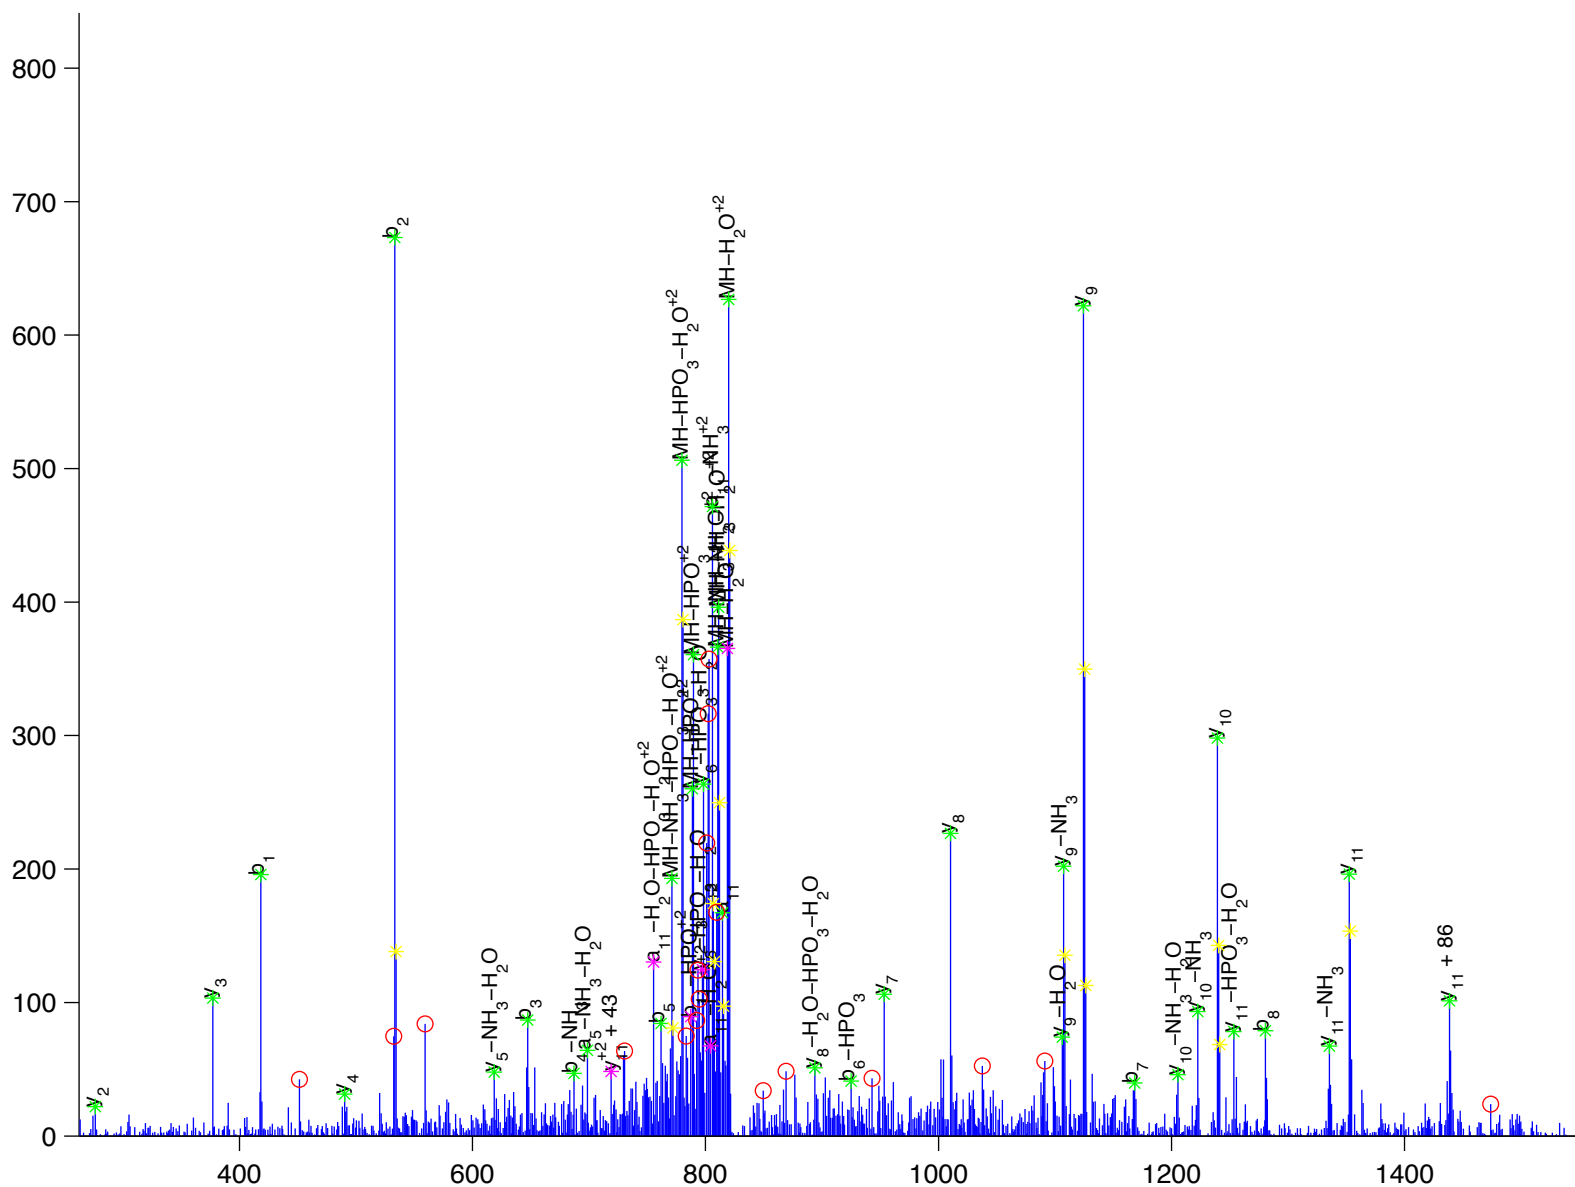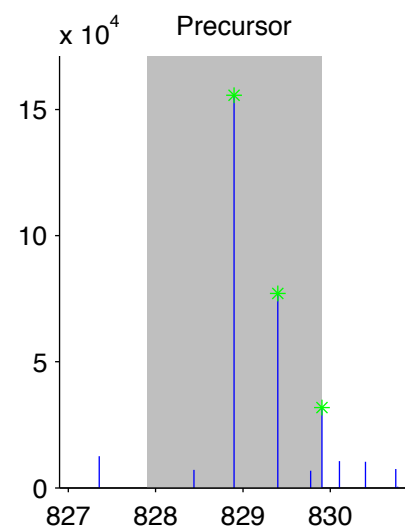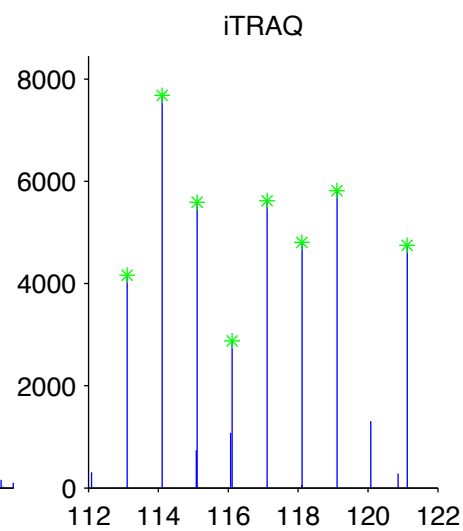

T [ D ] E [ F ] Q [ L ] H [ T ] N [ V ] N [ D ] G [ T ] E [ F ] G [ G ] S [ I ] y [ Q ] K

voltage-dependent anion channel 1

Charge State: +4

Scan Number: 6056

File Name: 090806ptp1blivers\_M\_NC2.raw

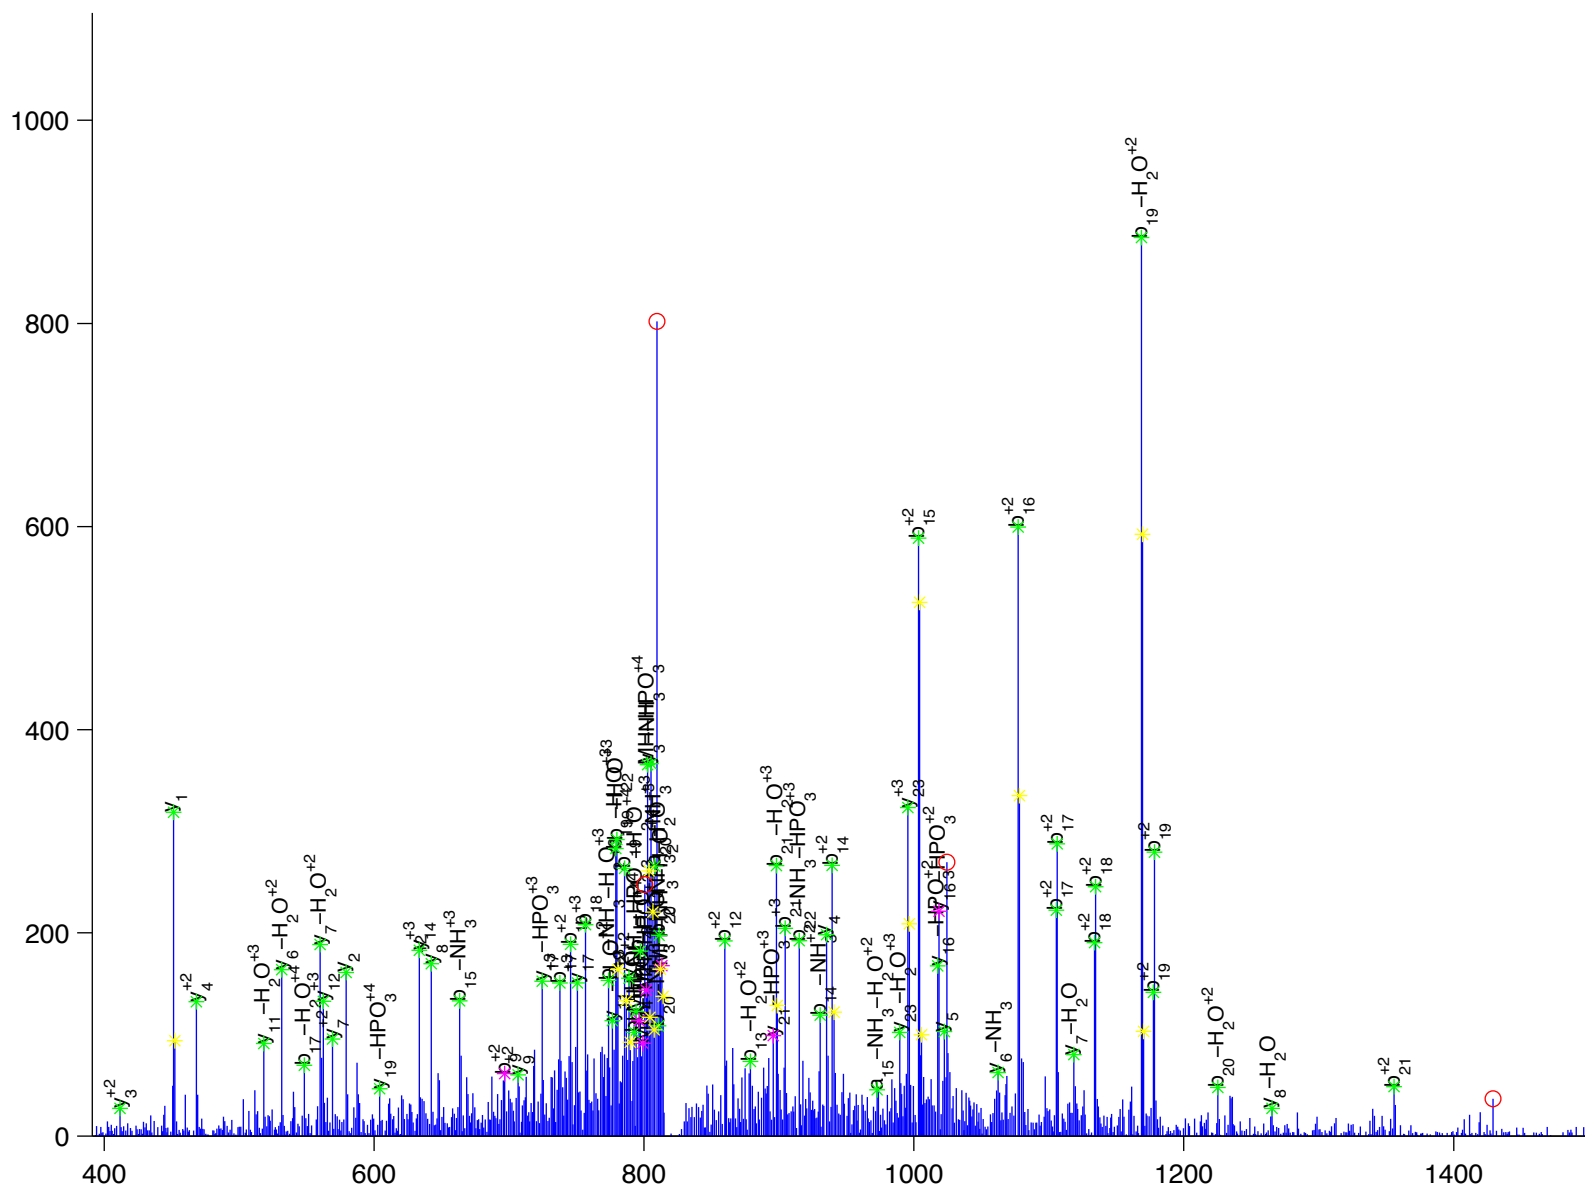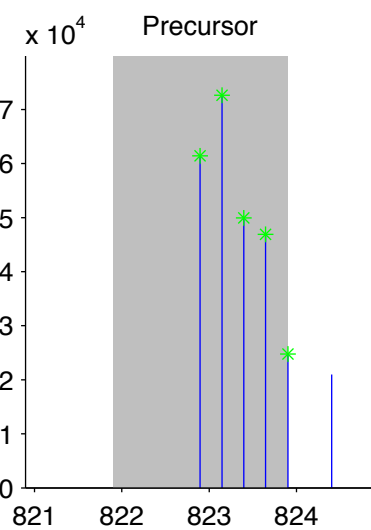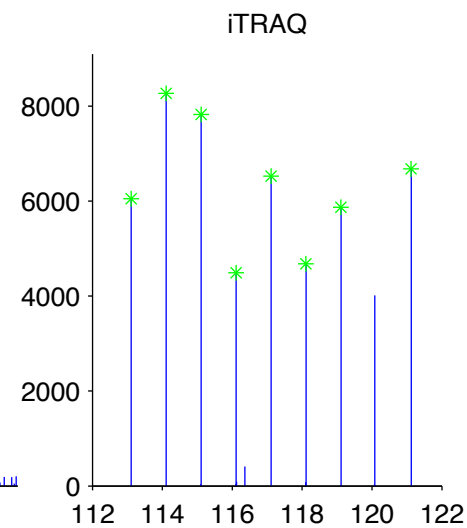

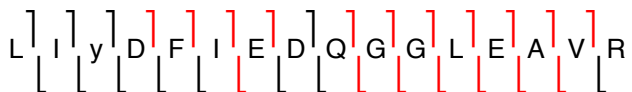

Wiskott–Aldrich syndrome homolog

Charge State: +3

Scan Number: 11030

File Name: 090806ptp1blivers\_M\_NC2.raw

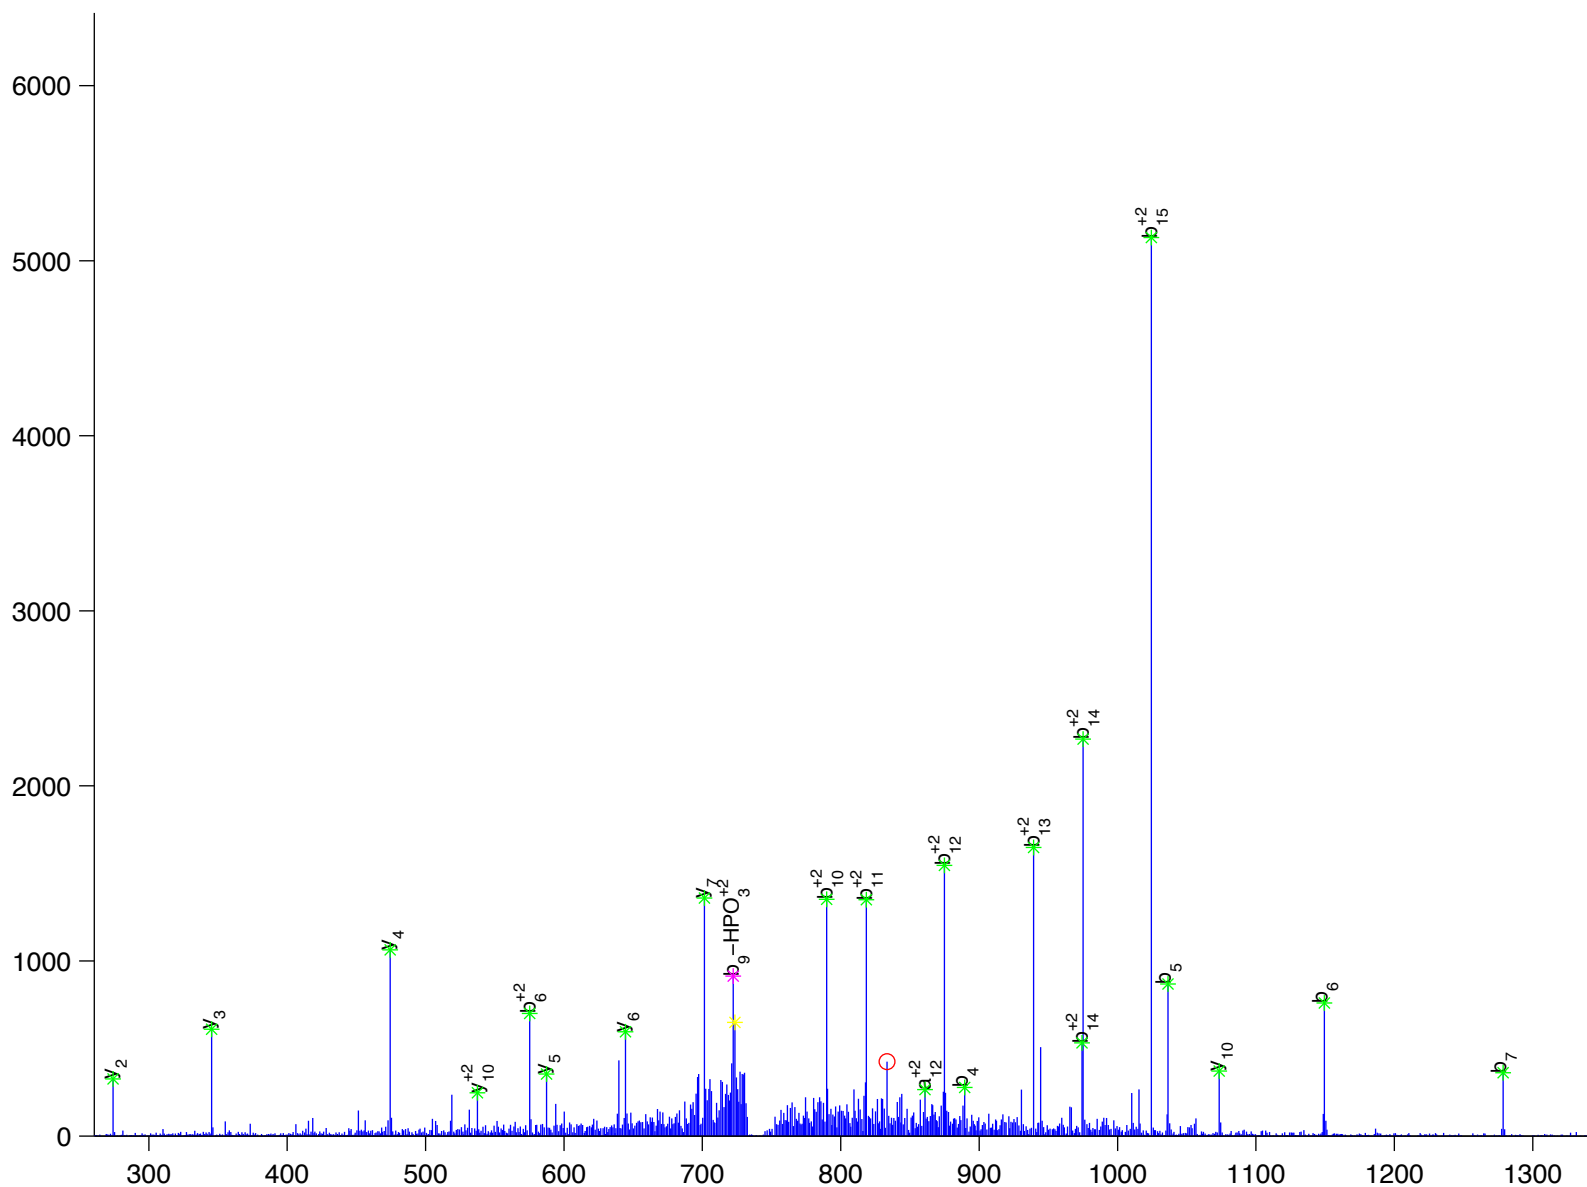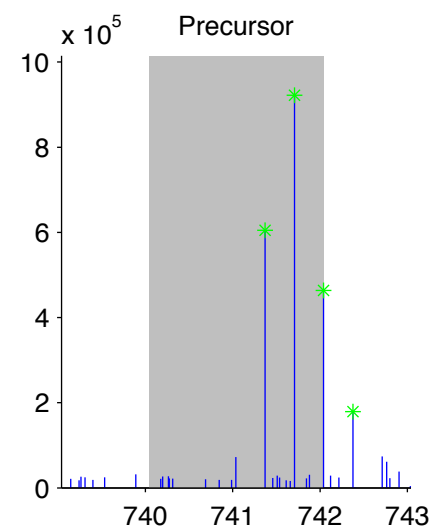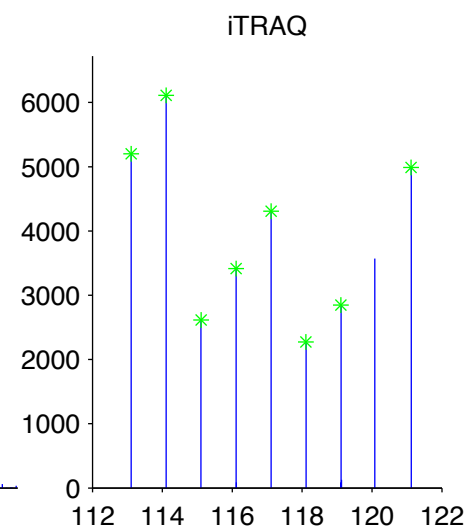

V I y D F I E K

Wiskott–Aldrich syndrome–like

Charge State: +3

Scan Number: 9417

File Name: 090806ptp1blivers\_M\_NC2.raw

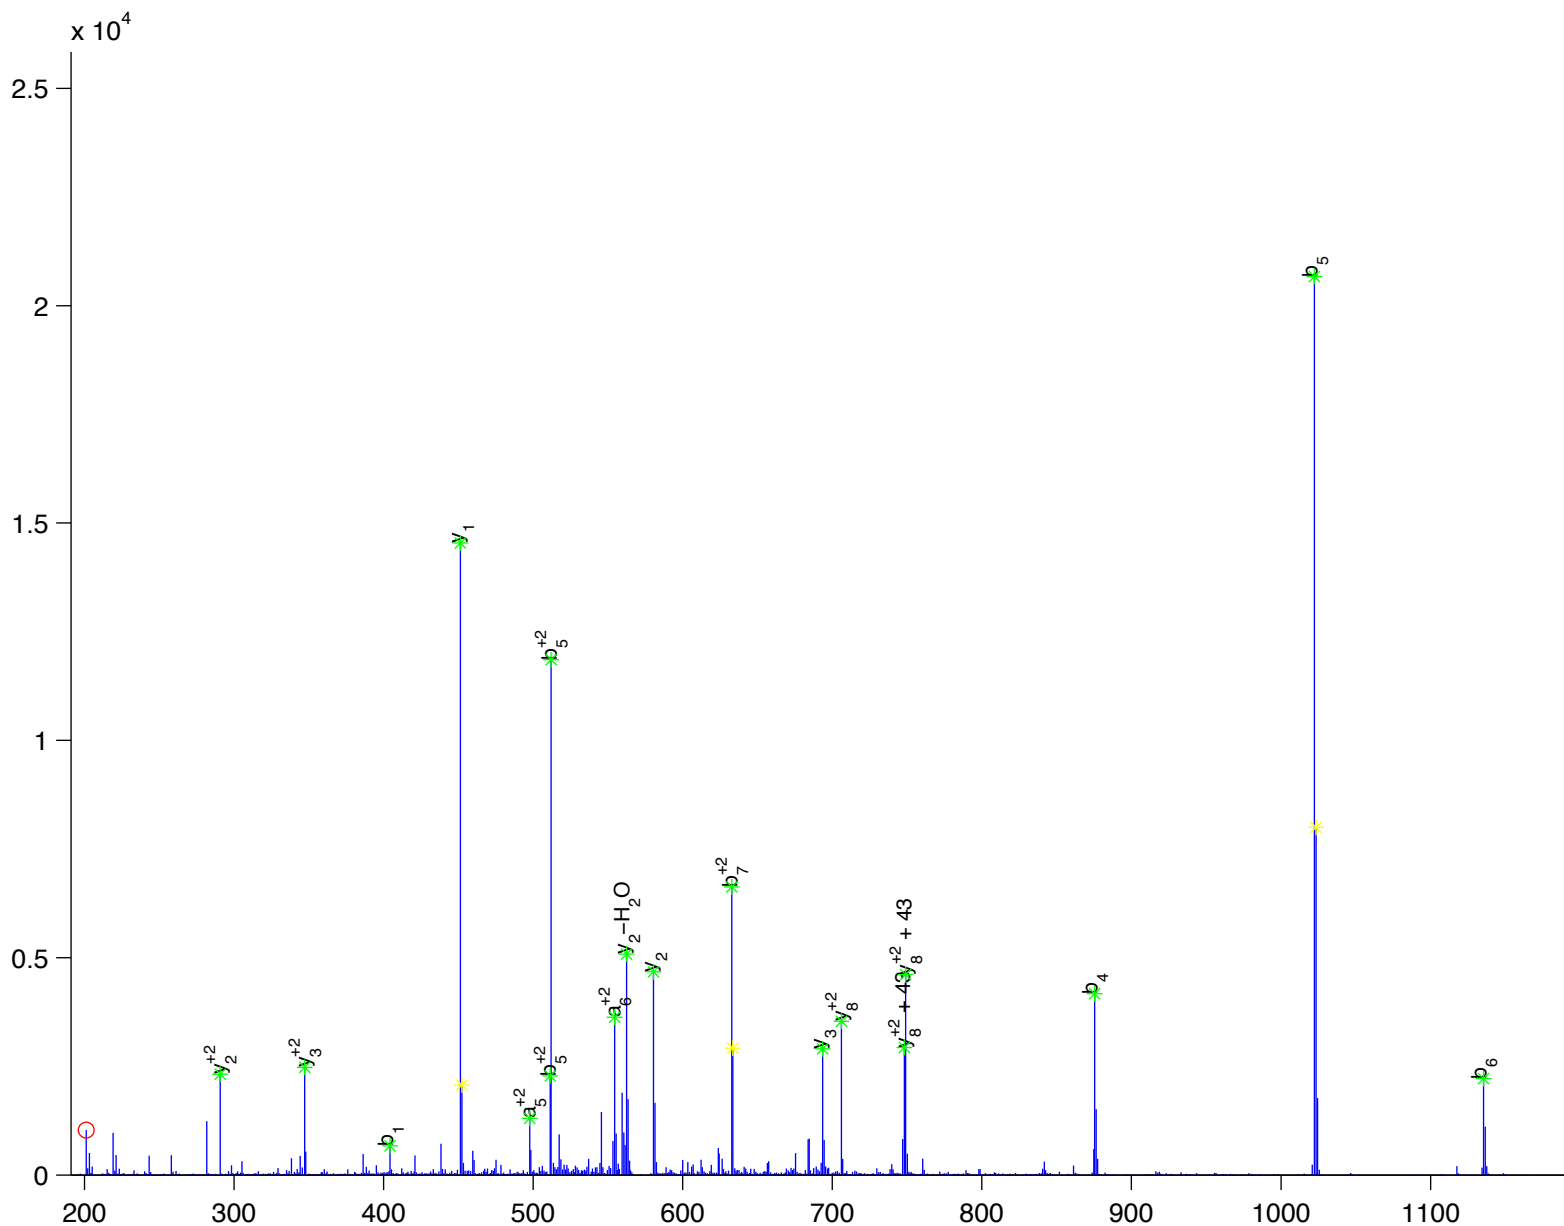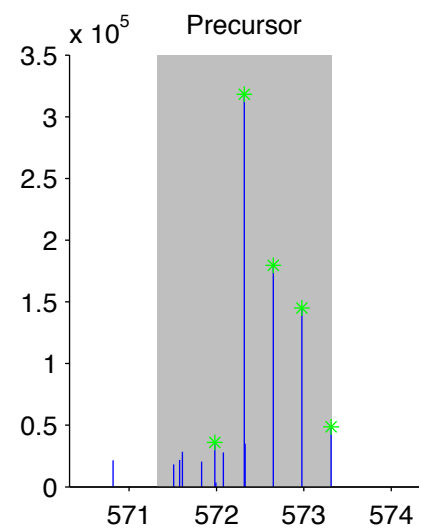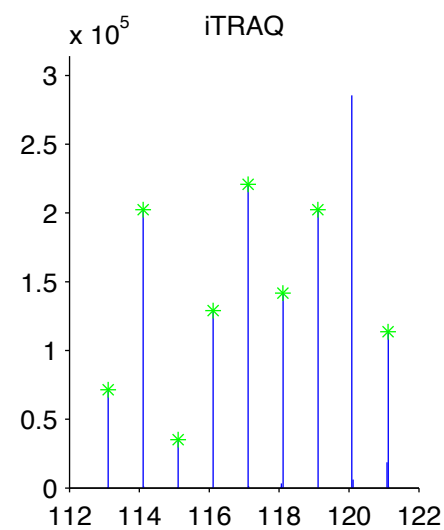



V I E D N E y T A R

Yamaguchi sarcoma viral (v-yes-1) oncogene homolog

Charge State: +2

Scan Number: 3913

File Name: 090806ptp1blivers\_M\_NC2.raw

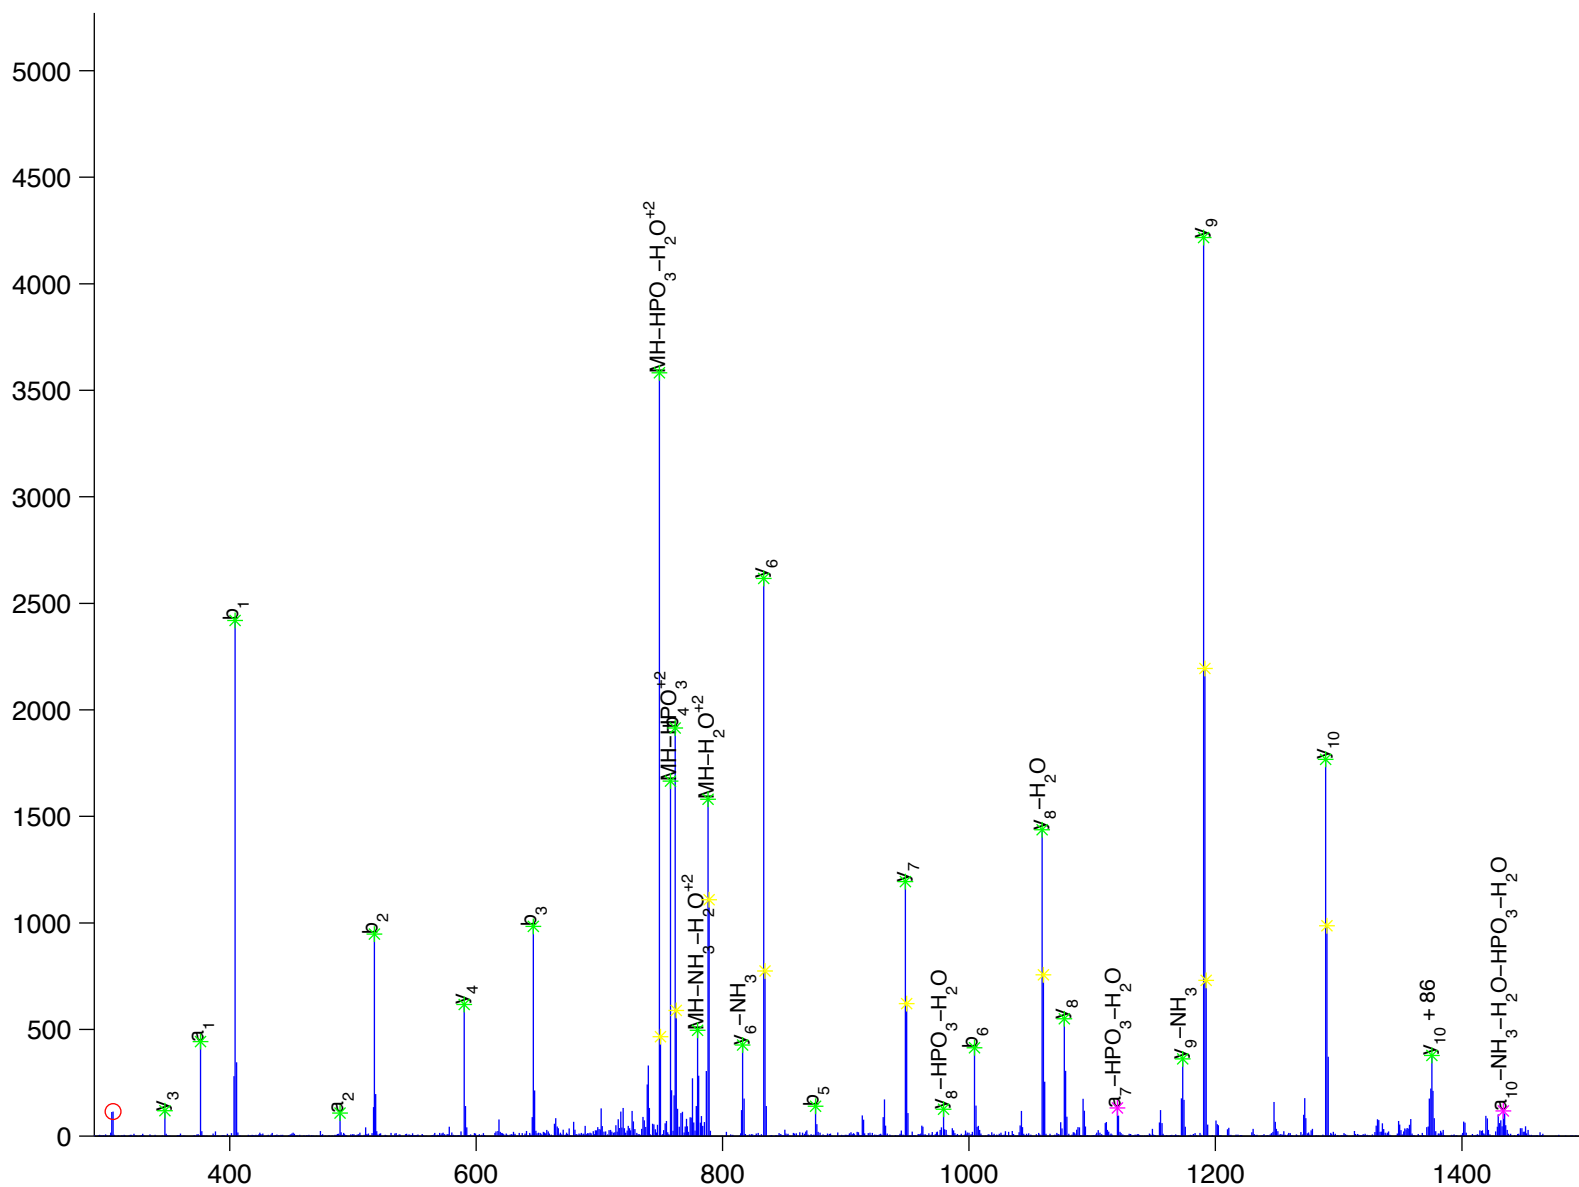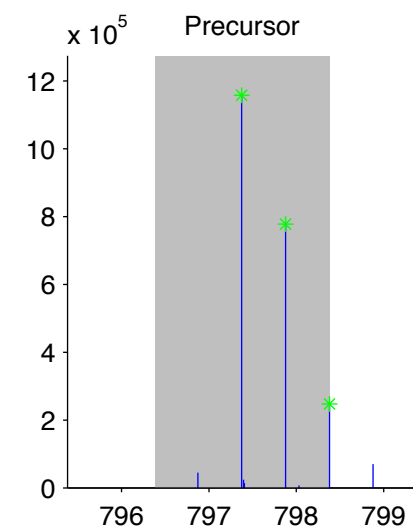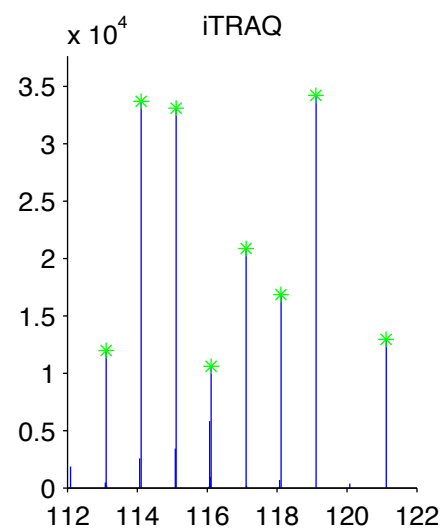

S [ L [ D [ N [ G [ G [ Y ] y ] I [ S ] P ] R

Yamaguchi sarcoma viral (v-yes-1) oncogene homolog

Charge State: +2

Scan Number: 4745

File Name: 090806ptp1blivers\_M\_NC2.raw

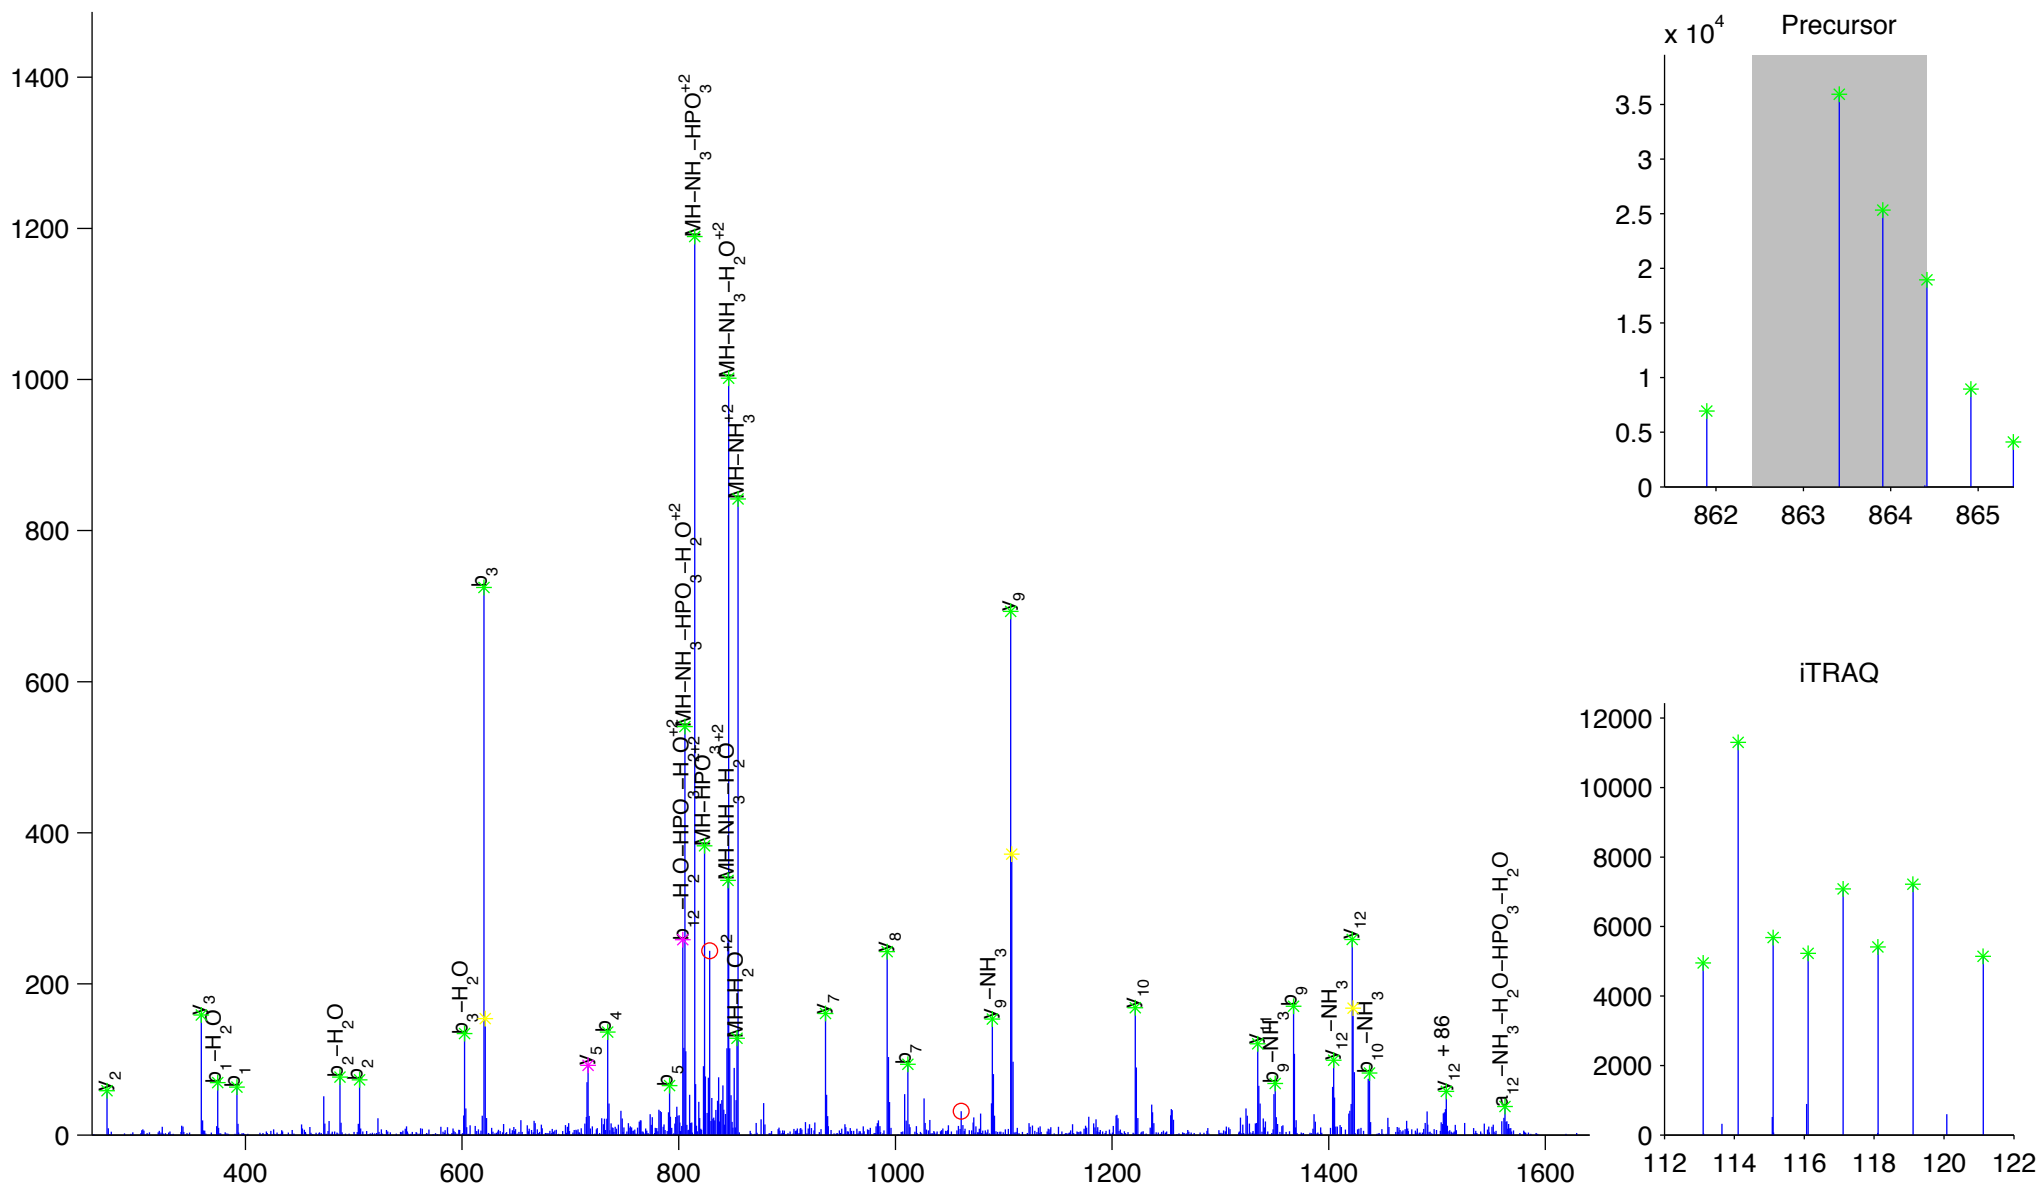



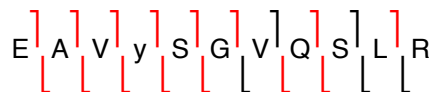

zinc finger CCCH type, antiviral 1

Charge State: +2

Scan Number: 5684

File Name: HJ072909\_HFD\_E1.raw

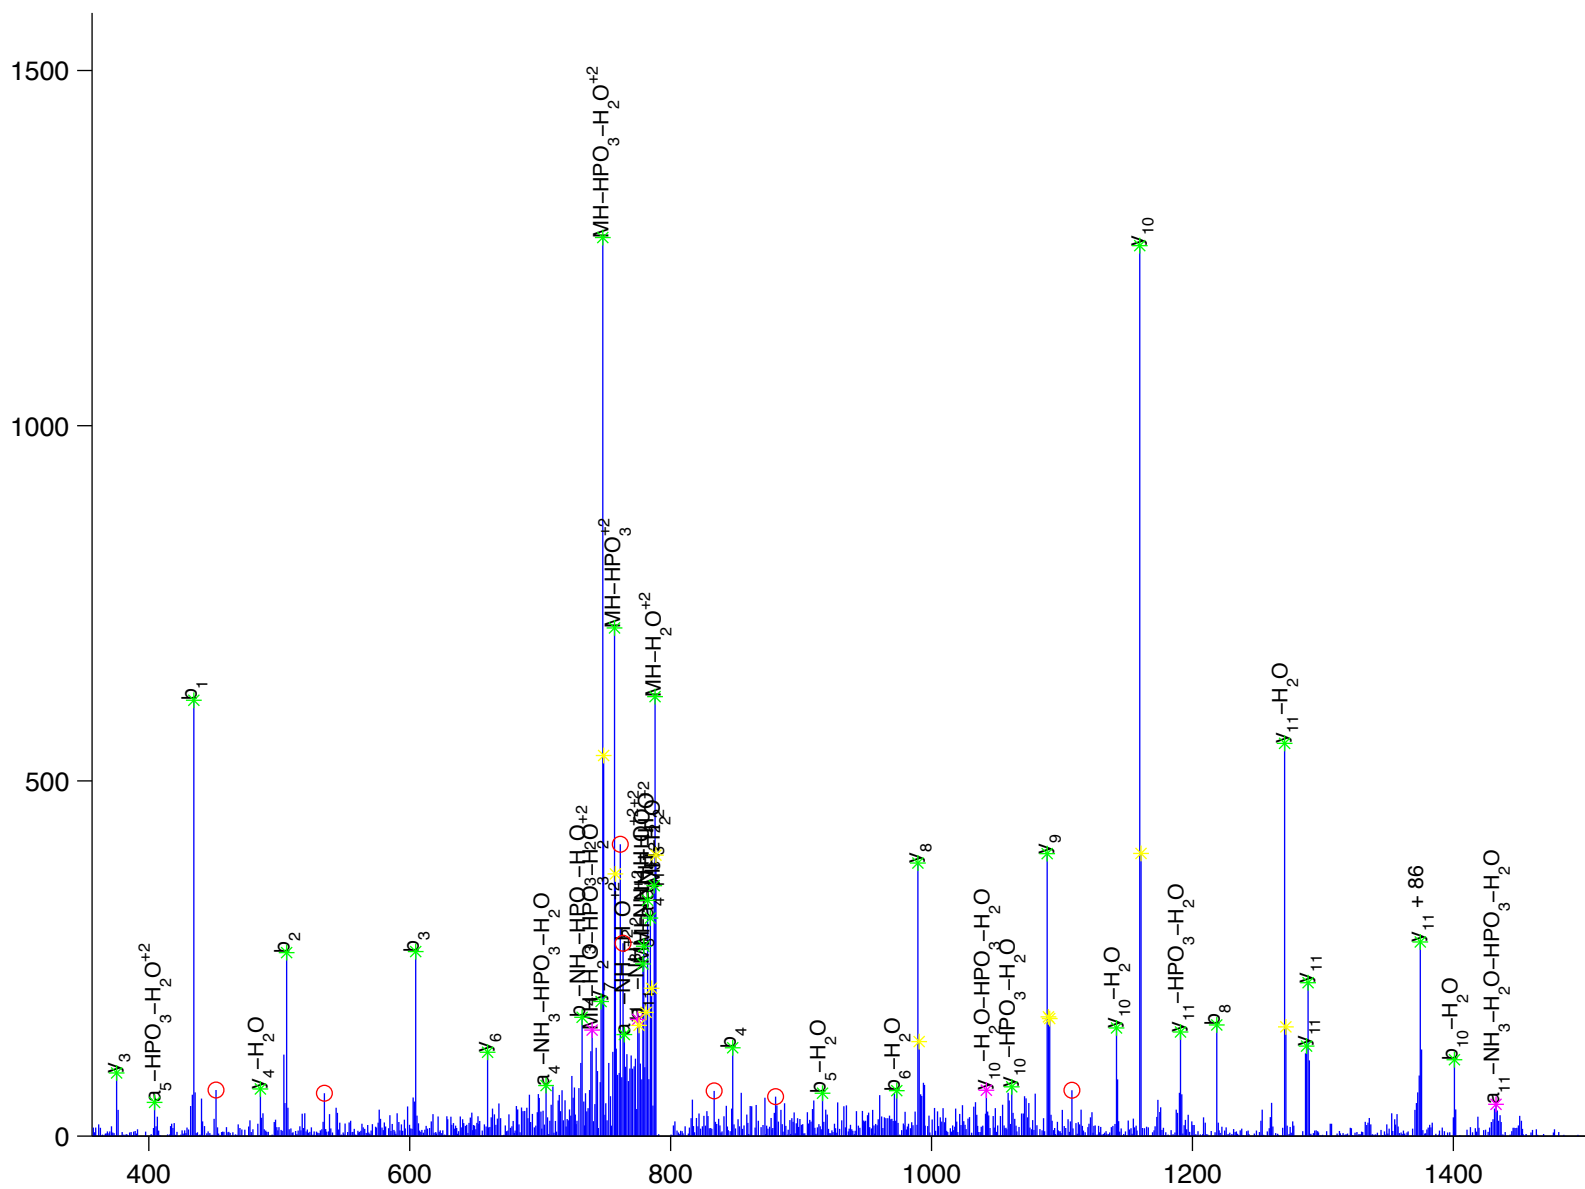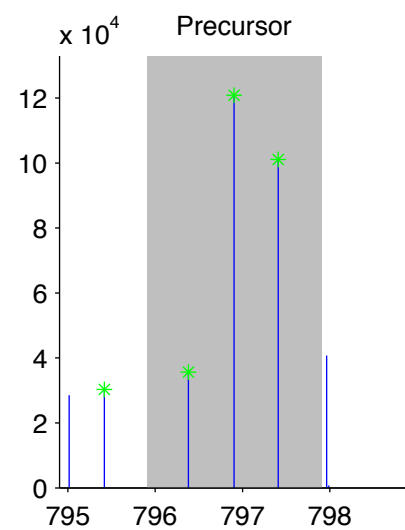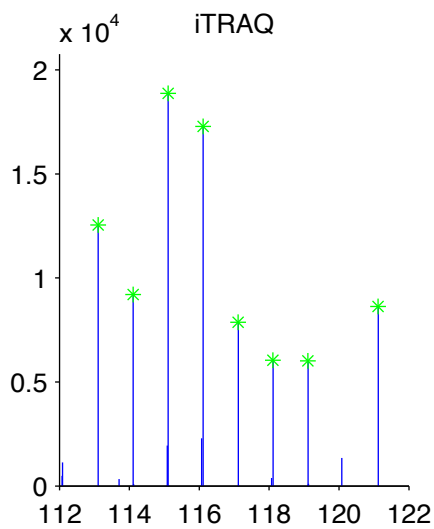

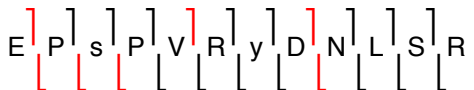

zinc finger, DHHC domain containing 8

Charge State: +2

Scan Number: 4378

File Name: 091130ptp1blivers\_hfd\_basal2.raw

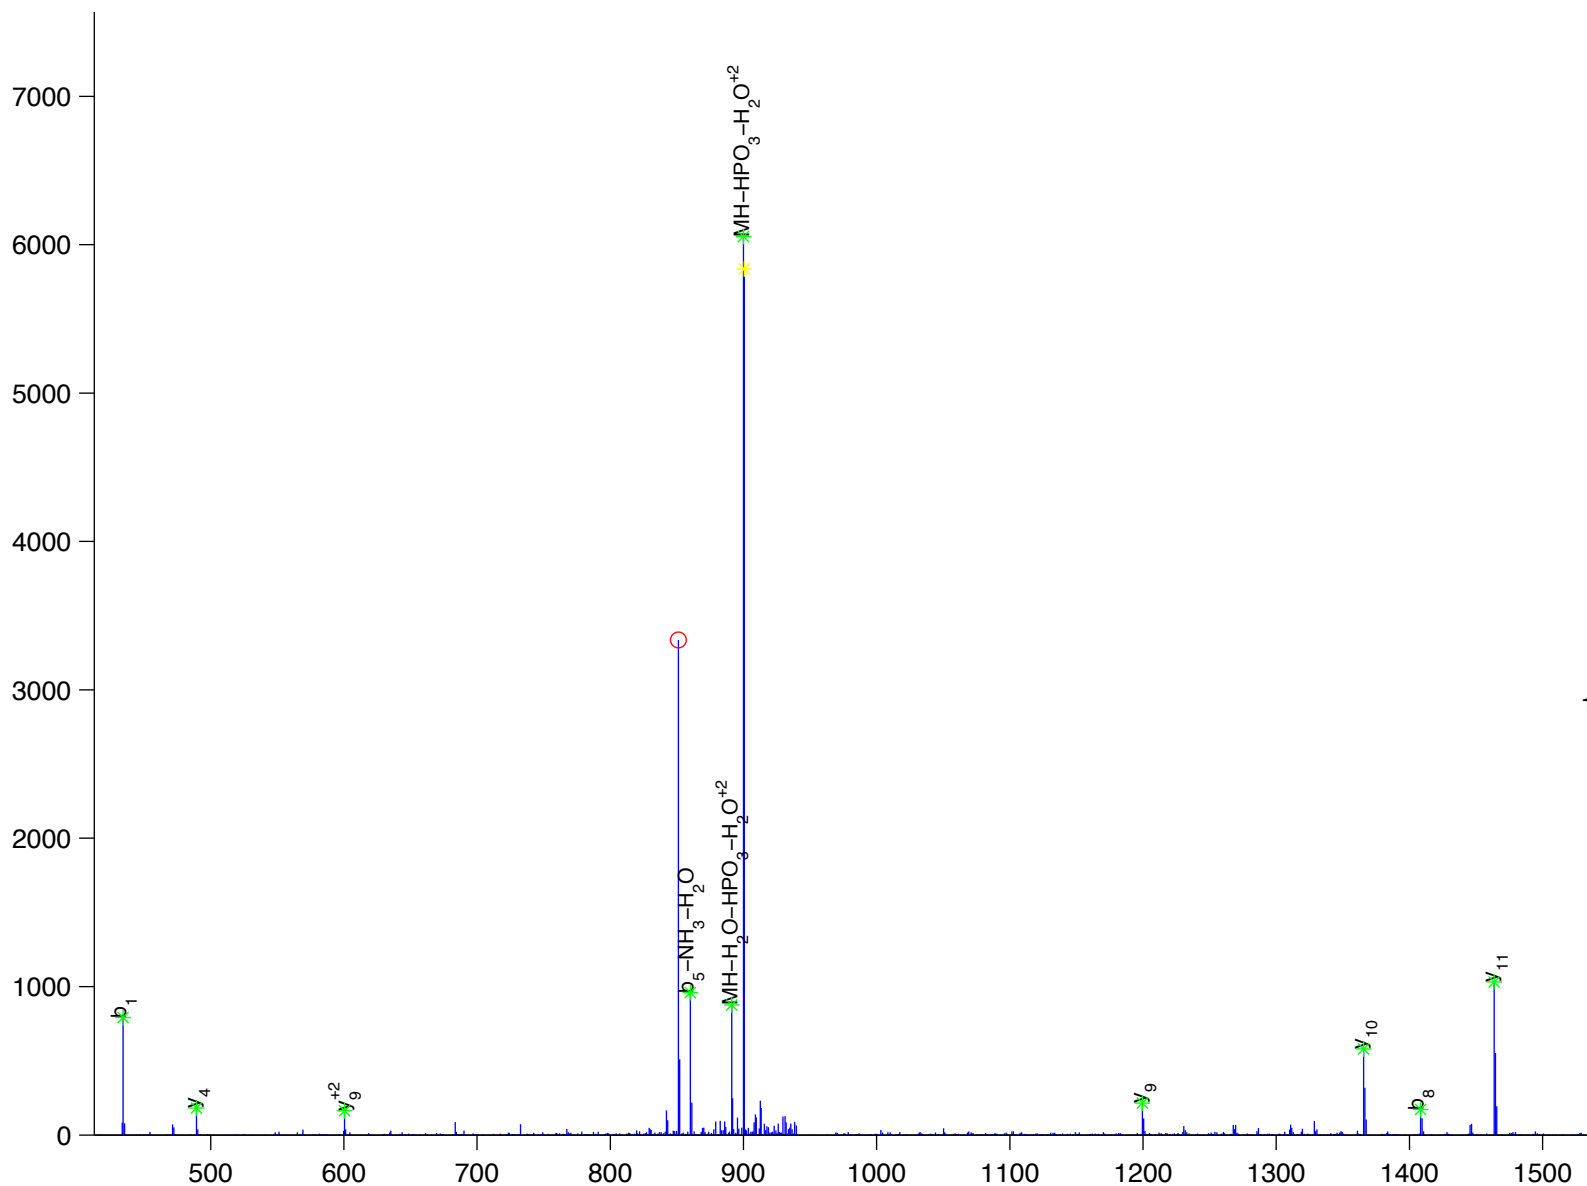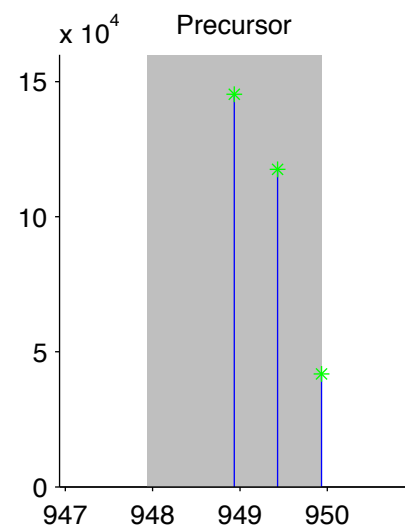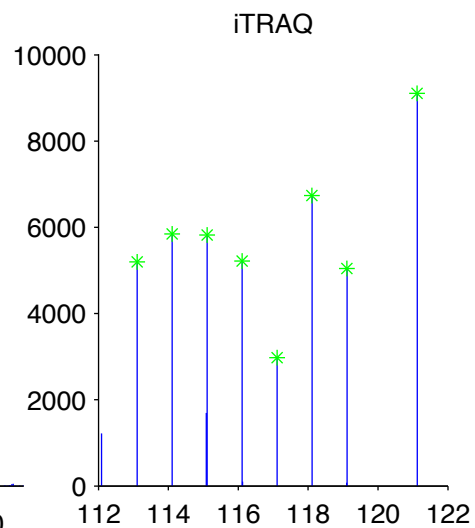

Supplement: c3ib40013a_2.pdf [file c3ib40013a_2.pdf]
