# Supplementary material for: Molecular network analysis of phosphotyrosine and lipid metabolism in hepatic PTP1b deletion mice
Source: Royal Society of Chemistry journal article supplement (doi:10.1039/c3ib40013a), 2013-01-01
Supplement: c3ib40013a.pdf [file c3ib40013a.pdf]

## Supplemental Information

### Contents

|                                                                                                                                                   |    |
|---------------------------------------------------------------------------------------------------------------------------------------------------|----|
| Supplemental Information .....                                                                                                                    | 1  |
| Supplementary Figures .....                                                                                                                       | 2  |
| Figure S1. Diet-dependent Phosphosites .....                                                                                                      | 2  |
| Figure S2. Co-elution to Determine PUFA Species .....                                                                                             | 3  |
| Figure S3. Measurements of Inflammation in HFD Liver.....                                                                                         | 4  |
| Figure S4. HFD Basal Serum Triglyceride Compositions.....                                                                                         | 5  |
| Figure S5. ACC phosphorylation.....                                                                                                               | 6  |
| Figure S6. SMR .....                                                                                                                              | 7  |
| Figure S7. Missing Data Methods .....                                                                                                             | 8  |
| Supplemental Tables.....                                                                                                                          | 9  |
| Table S1: Animal weight and serum measurements.....                                                                                               | 9  |
| Table S2: Phosphotyrosine measurements.....                                                                                                       | 10 |
| Table S3: Sets tested in phosphosite-set enrichment analysis .....                                                                                | 32 |
| Table S4: Enrichment analysis of genotype-dependent phosphosites .....                                                                            | 40 |
| Table S5: Enrichment of diet-dependent phosphosites.....                                                                                          | 43 |
| Table S6: Quantification of hepatic free fatty acids .....                                                                                        | 44 |
| Table S7: Quantification of hepatic triglycerides and total cholesterol.....                                                                      | 47 |
| Table S8: HFD Serum Triglyceride Compositions.....                                                                                                | 50 |
| Table S9: Enrichments for phosphosites predictive of the PTP1b-dependent $\omega$ 3 / $\omega$ 6 PUFA<br>(C24:6, C24:5, C24:4, C22:3, C20:3)..... | 51 |
| Table S10: Enrichments for phosphosites predictive of PTP1b-dependent $\omega$ 7 / $\omega$ 9 PUFA<br>(C20:3, C22:3, C20:2, C18:3).....           | 52 |
| Table S11: Enrichments for phosphosites predictive of steatosis.....                                                                              | 54 |

Supplementary Figures

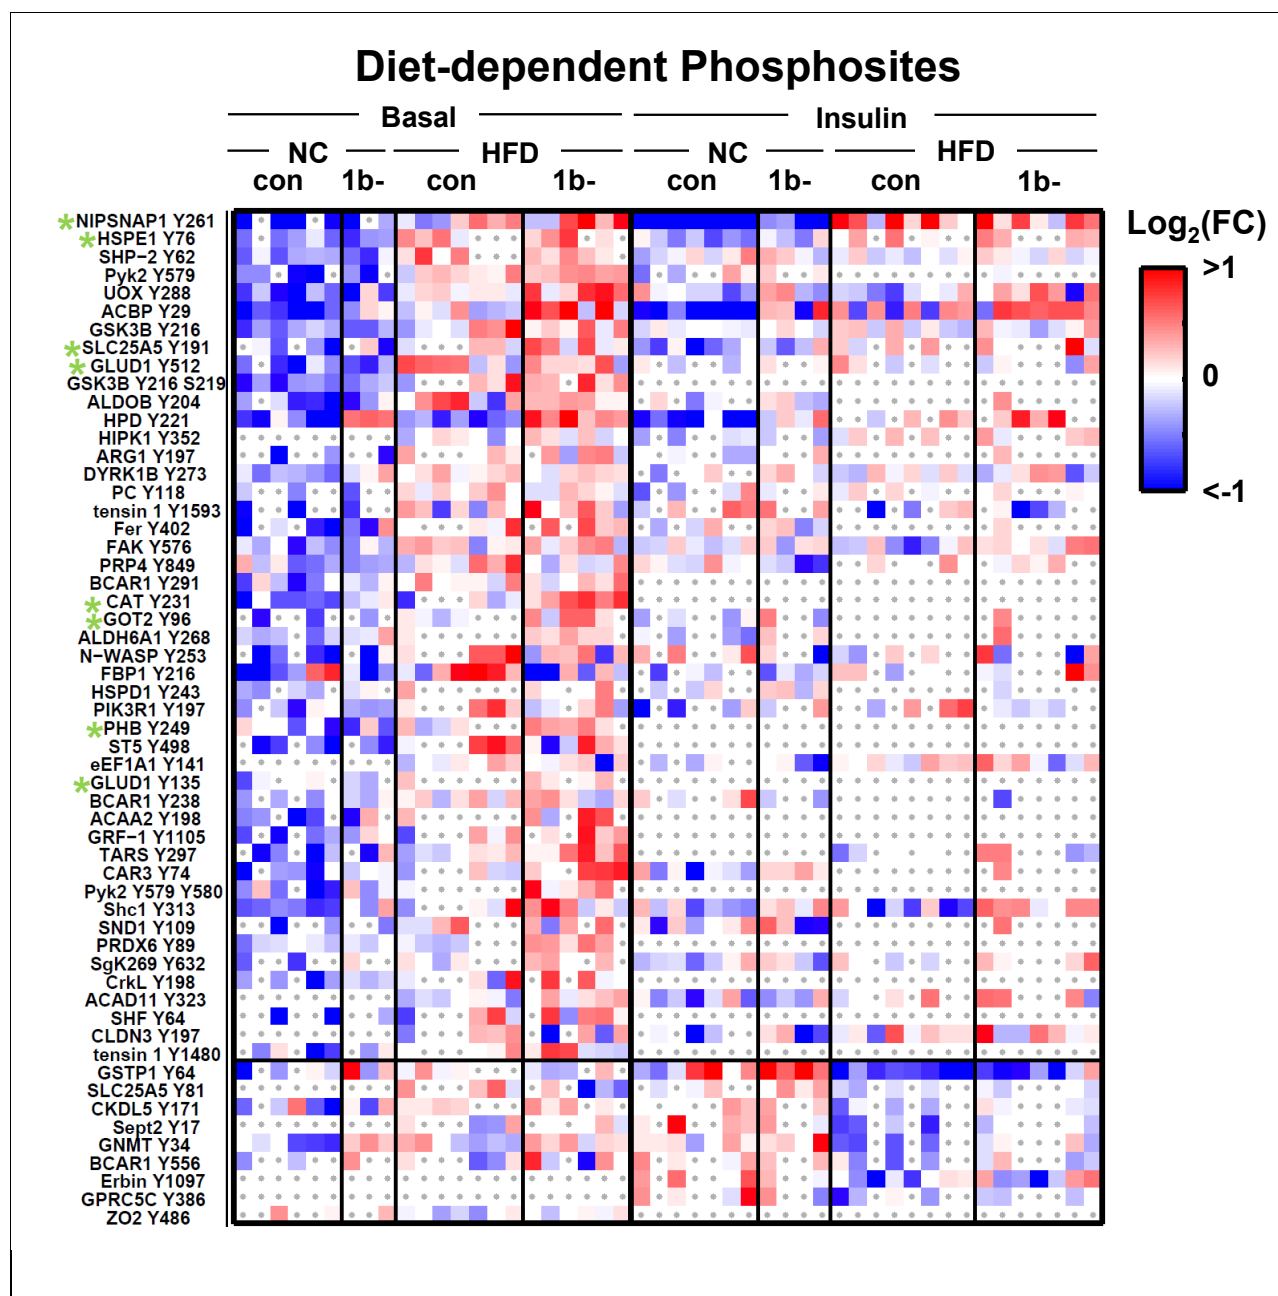

**Figure S1. Diet-dependent Phosphosites**

Heatmaps of those phosphorylation sites most significantly correlated to diet (raw, context-specific  $p$ -value  $< .025$ , see Methods). For basal or insulin datasets, the phosphorylation level of a phosphosite was normalized to the corresponding phosphosite mean (basal or insulin) and then  $\log_2$ -transformed. Missing data points are denoted by grey dots over white boxes. Negatively and positively correlated phosphosites are segregated. Green asterisks denote mitochondrial proteins. The phosphosites are separated into two clusters, dependent on whether HFD increases or decreases phosphorylation on the site.

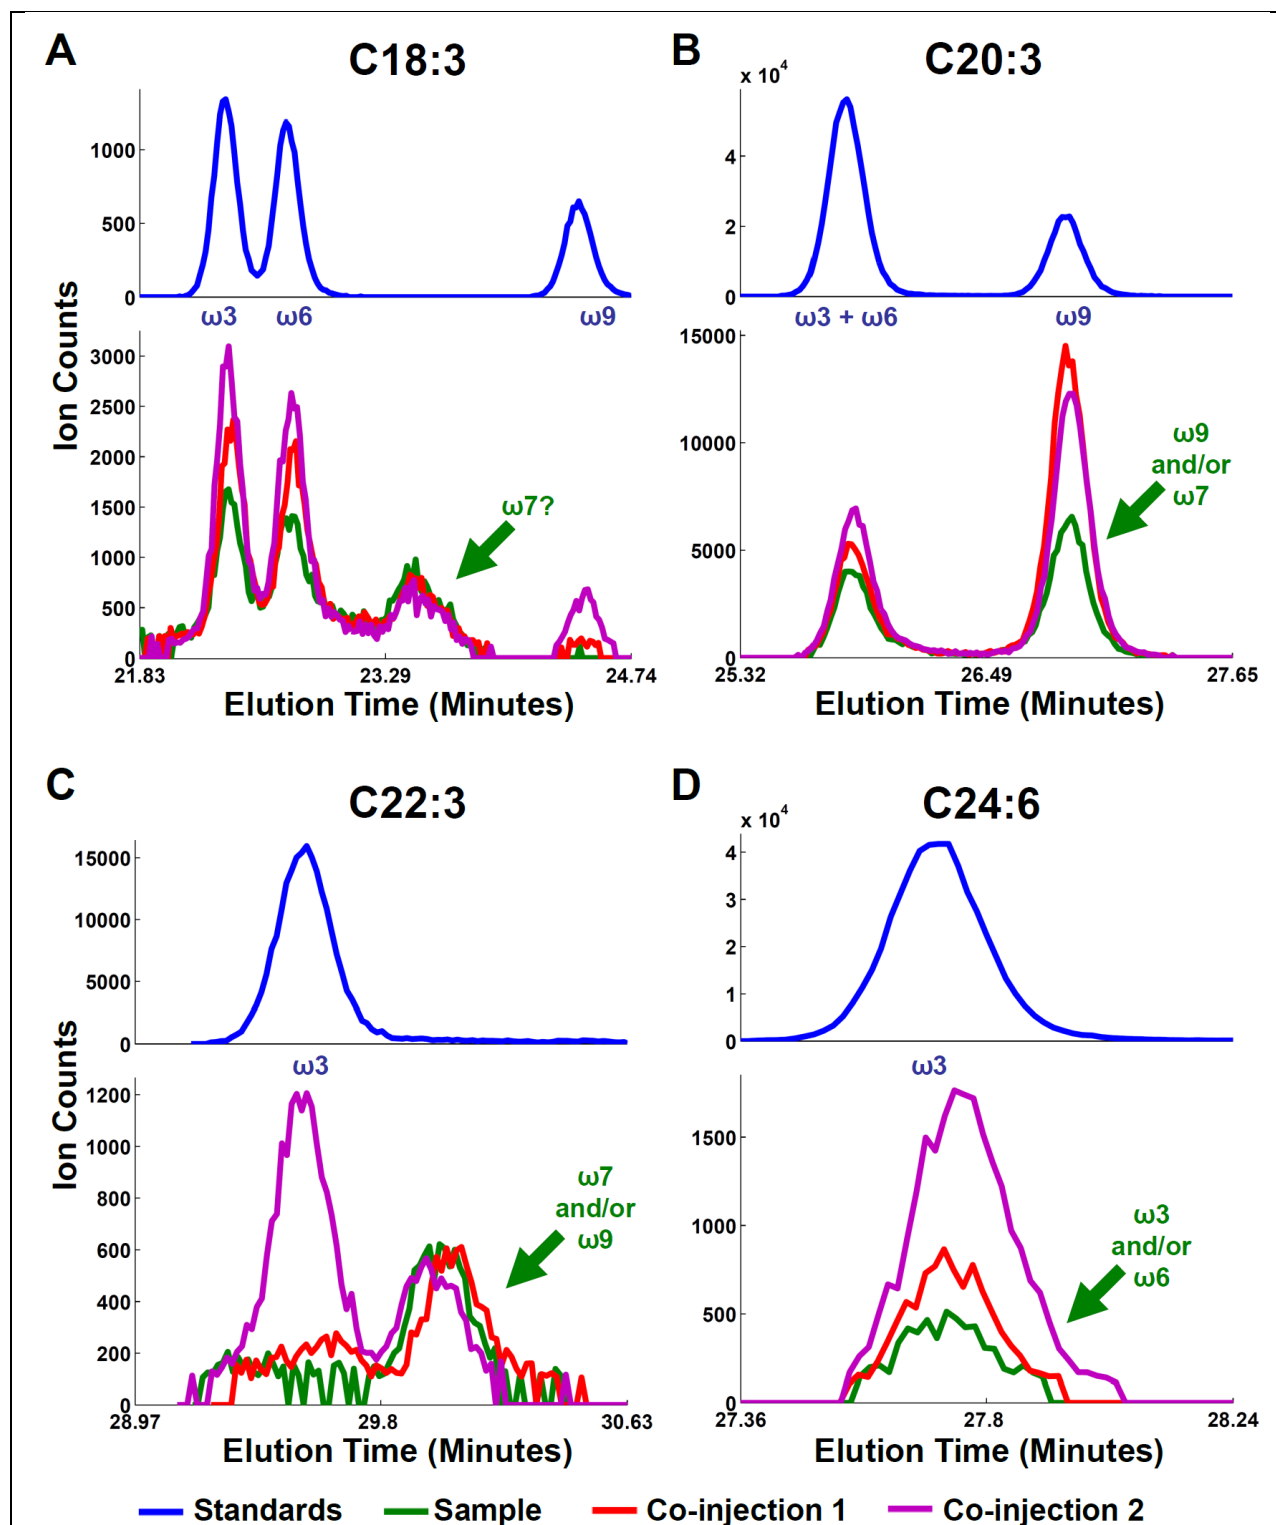

**Figure S2. Co-elution to Determine PUFA Species**

Blue and green curves correspond to ionchromatograms from standards and liver lipid samples analyzed in independent LC-MS experiments. Standards and lipid samples were co-injected (red and purple curves) in two additional experiments to determine the PTP1b-dependent isomer peak indicated by the green arrow. See text for discussion of results.

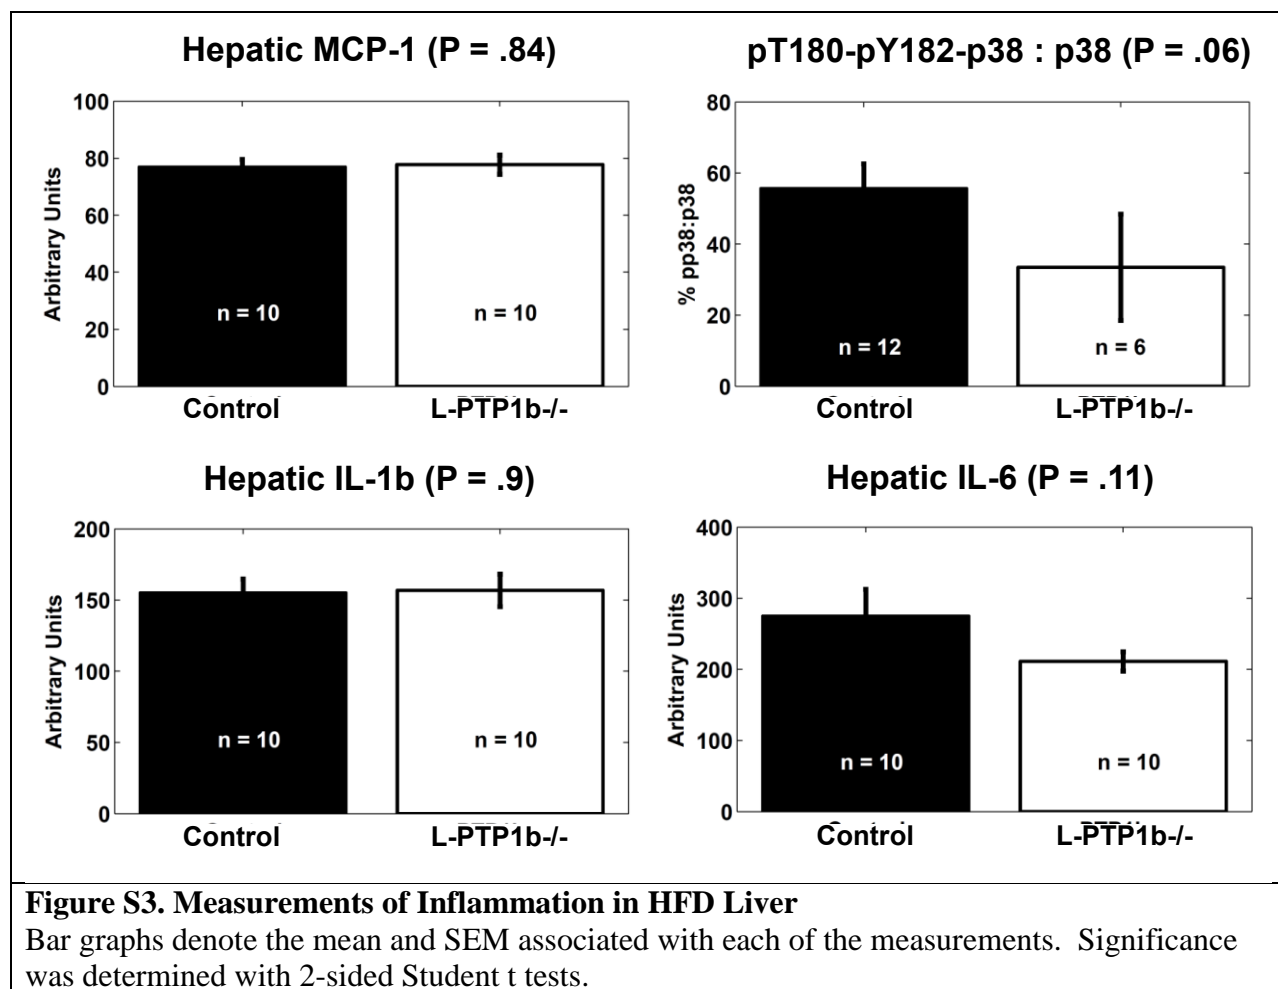

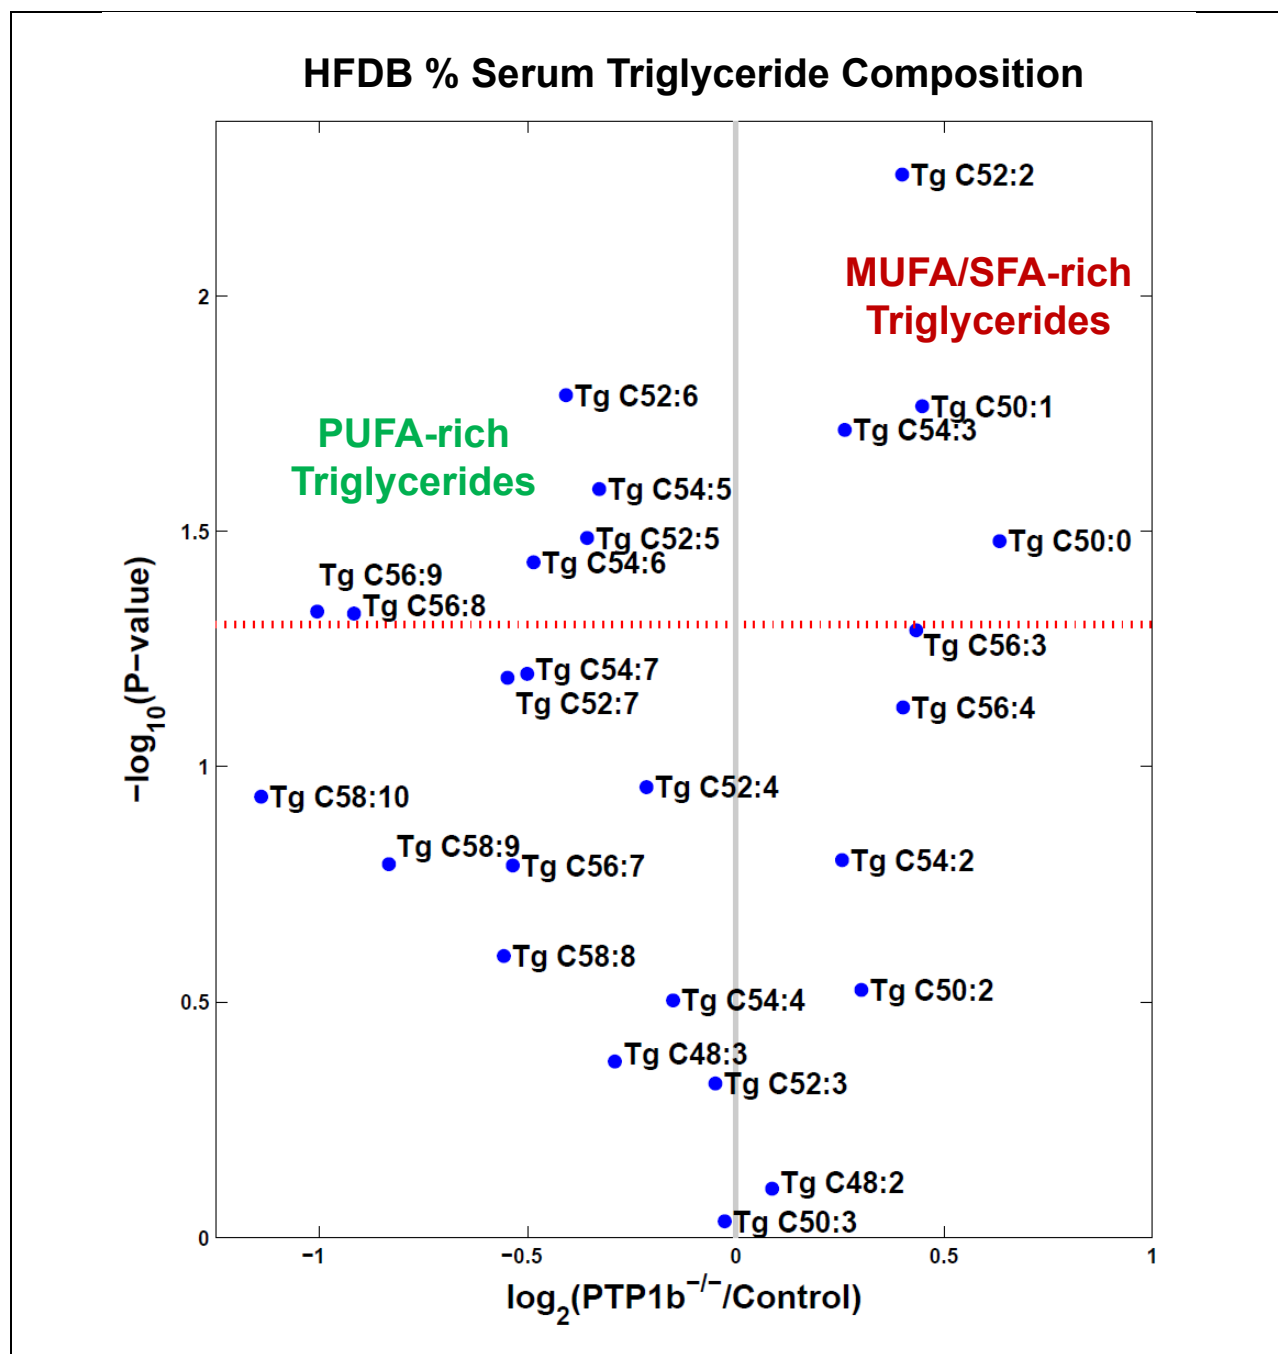

**Figure S4. HFD Basal Serum Triglyceride Compositions**

Volcano plot of percent serum triglyceride compositions on HFD: Each triglyceride is plotted as a function of log<sub>2</sub>-transformed, compositional fold-change (L-PTP1b<sup>-/-</sup> relative to control) and corresponding statistical significance, -log<sub>10</sub>(P-value), control, n = 10, L-PTP1b<sup>-/-</sup>, n = 6. The dotted, red line corresponds to P-value = .05. Significance was determined with 2-sided Student t tests.

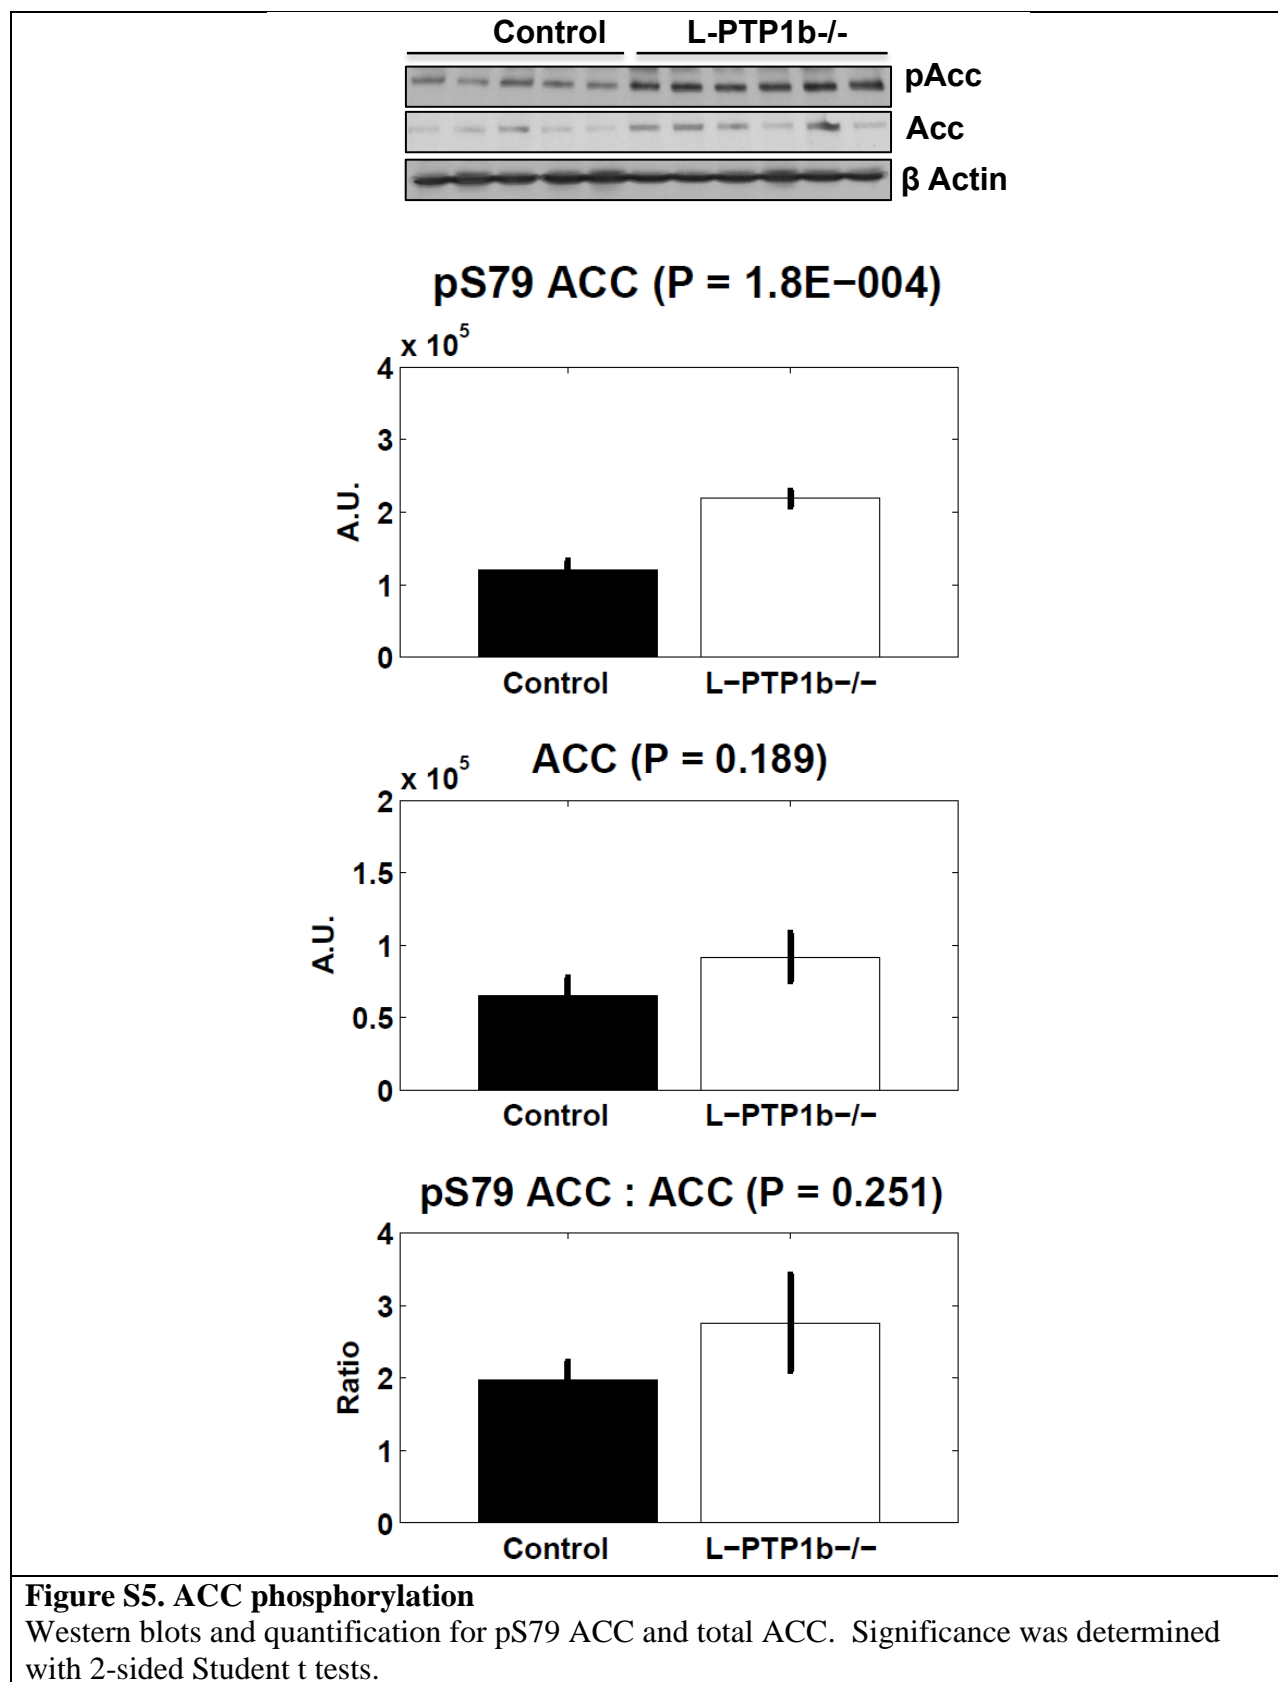

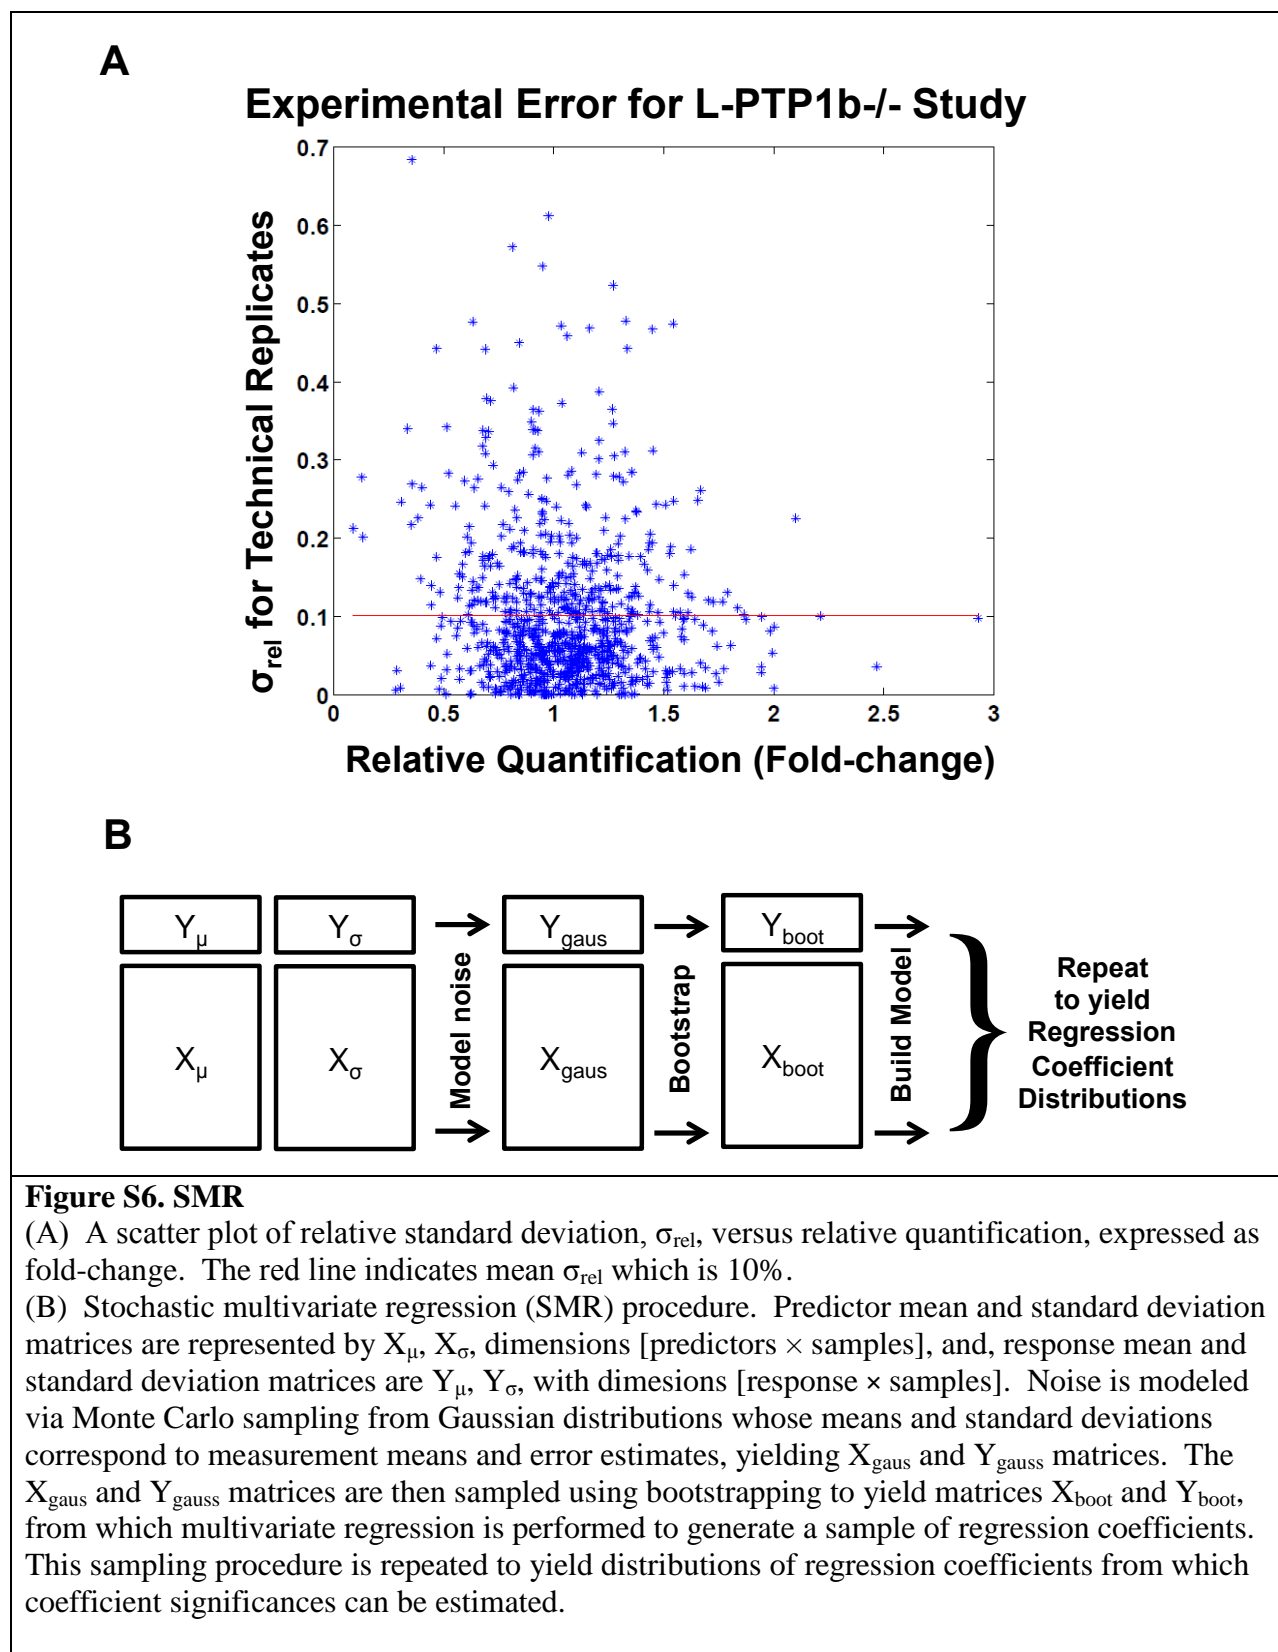

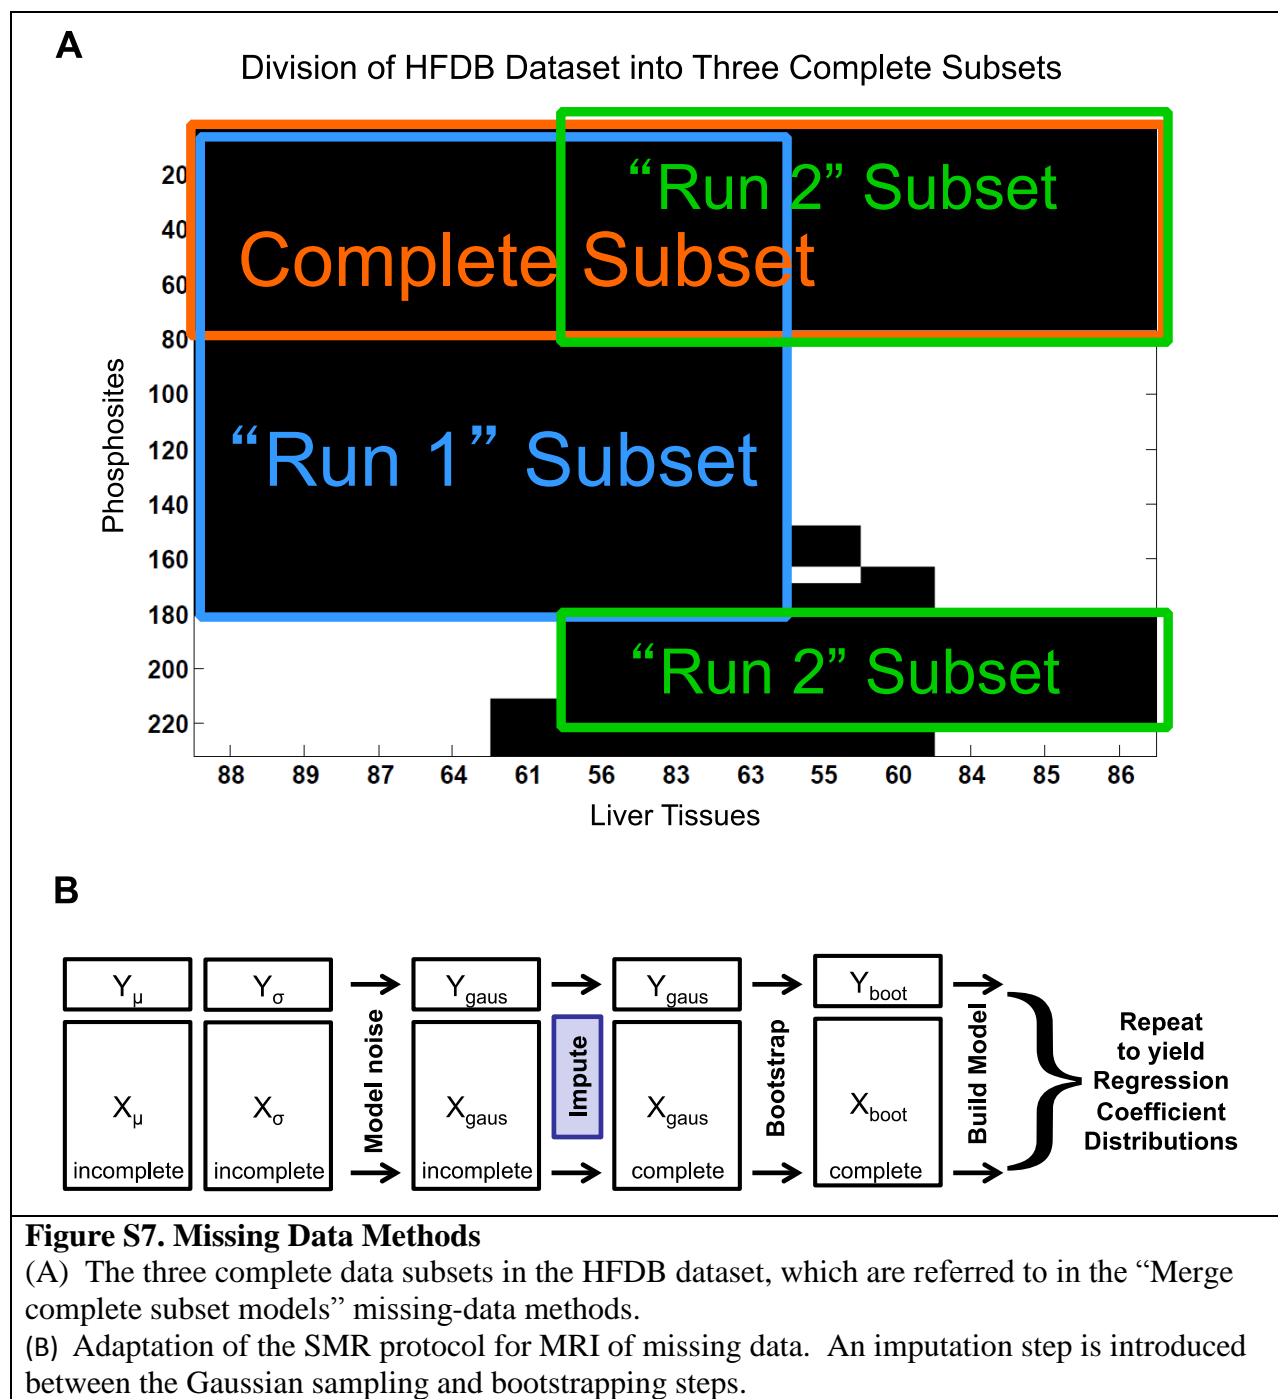



## Supplemental Tables

**Table S1: Animal weight and serum measurements**

|                                    | NC                       |                        | HFD                       |                          |
|------------------------------------|--------------------------|------------------------|---------------------------|--------------------------|
|                                    | Control                  | L-PTP1b <sup>-/-</sup> | Control                   | L-PTP1b <sup>-/-</sup>   |
| <b>Weight (g)</b>                  | 25.4 +/- 1.0 (n = 13)    | 24.7 +/- 1.1 (n = 8)   | 32.8 +/- 1.4 (n = 19)***  | 30.3 +/- 0.8 (n = 17)    |
| <b>Fed Glucose (mg/dL)</b>         | 192 +/- 6 (n = 13)       | 197 +/- 11 (n = 8)     | 236 +/- 7 (n = 15)***     | 223 +/- 11 (n = 13)      |
| <b>Fed Insulin (ng/mL)</b>         | 0.89 +/- 0.13 (n = 7)    | 0.73 +/- 0.22 (n = 5)  | 3.47 +/- 0.91 (n = 7)*    | 2.92 +/- 0.94 (n = 5)    |
| <b>Fasting Glucose (mg/dL)</b>     | 114 +/- 7 (n = 12)       | 160 +/- 11 (n = 8)**   | 120 +/- 8 (n = 15)        | 162 +/- 16 (n = 13)*     |
| <b>Fasted Insulin (pM)</b>         | 56.42 +/- 10.24 (n = 6)  | 26.46 +/- 3.35 (n = 5) | 63.3 +/- 13.14 (n = 8)    | 60.15 +/- 19.67 (n = 6)  |
| <b>Serum Triglycerides (mg/dL)</b> | 91.67 +/- 10.94 (n = 12) | 78.38 +/- 8.22 (n = 8) | 125.93 +/- 15.88 (n = 15) | 91.85 +/- 7 (n = 13)     |
| <b>Cholesterol (mg/dL)</b>         | 98.83 +/- 6.57 (n = 6)   | 83.6 +/- 12.52 (n = 5) | 144.63 +/- 16.19 (n = 8)^ | 113.86 +/- 24.95 (n = 7) |
| <b>HDL (mg/dL)</b>                 | 81.67 +/- 6.35 (n = 6)   | 69.4 +/- 11.53 (n = 5) | 114.63 +/- 12.06 (n = 8)  | 88.43 +/- 19.37 (n = 7)  |
| <b>LDL (mg/dL)</b>                 | 4.33 +/- 0.78 (n = 6)    | 3.6 +/- 1.4 (n = 5)    | 10.63 +/- 1.93 (n = 8)*   | 14.86 +/- 4.29 (n = 7)   |
| <b>Adiponectin (pg/mL)</b>         | 12.68 +/- 1.41 (n = 13)  | 11.45 +/- 1.05 (n = 8) | 11.93 +/- 0.91 (n = 15)   | 15.03 +/- 1.48 (n = 11)  |
| <b>Leptin (pM)</b>                 | 54.24 +/- 19.56 (n = 5)  | 47.13 +/- 27.1 (n = 3) | 168.97 +/- 89.5 (n = 7)   | 186.58 +/- 76.37 (n = 6) |
| <b>Glucagon (pM)</b>               | 25.04 +/- 6.98 (n = 7)   | 18.72 +/- 4.48 (n = 5) | 21.88 +/- 4.34 (n = 8)    | 17.57 +/- 3.42 (n = 7)   |

Serum measurements and weight gain are written as mean +/- standard error for each of the diet and genotype conditions. The number of mice analyzed per condition is denoted in parentheses. Statistical analysis was performed using one-way ANOVA with sequential Sidak-Dunn method to adjust for multiple comparisons: (1) L-PTP1b<sup>-/-</sup> mice to control on NC diet, (2) L-PTP1b<sup>-/-</sup> mice to control on HFD, and (3) HFD control to NC control. \*\*\* = P<.001, \*\* = P<.01, \* = P < .05, ^ = P<.1.

**Table S2: Phosphotyrosine measurements**

| Protein  | Site | Peptide                                        | Full Name                                                                         | GI #        | Basal                 |                         |                        |                          | Insulin               |                         |                          |                       | Mascot Scores                      |
|----------|------|------------------------------------------------|-----------------------------------------------------------------------------------|-------------|-----------------------|-------------------------|------------------------|--------------------------|-----------------------|-------------------------|--------------------------|-----------------------|------------------------------------|
|          |      |                                                |                                                                                   |             | NC                    |                         | HFD                    |                          | NC                    |                         | HFD                      |                       |                                    |
|          |      |                                                |                                                                                   |             | Con.                  | L-1b-                   | Con.                   | L-1b-                    | Con.                  | L-1b-                   | Con.                     | L-1b-                 |                                    |
| HPD      | Y232 | SIVVTNyE<br>ESIK                               | 4-hydroxyphenylpyruvic acid dioxygenase                                           | gi 33859486 | 0.84 +/- 0.08 (n = 5) | 1.04 +/- 0.04 (n = 3)   | 0.98 +/- 0.02 (n = 7)  | 1.13 +/- 0.05 (n = 6)^   | n.d.                  | n.d.                    | n.d.                     | n.d.                  | 24, 64, 22, 49, 49                 |
| HPD      | Y221 | FWSVDDT<br>QVHTEyS<br>SLR                      | 4-hydroxyphenylpyruvic acid dioxygenase                                           | gi 33859486 | 0.66 +/- 0.09 (n = 6) | 1.39 +/- 0.02 (n = 3)** | 0.73 +/- 0.04 (n = 7)  | 1.46 +/- 0.13 (n = 6)*** | 0.62 +/- 0.07 (n = 7) | 1.09 +/- 0.12 (n = 4)** | 1.12 +/- 0.08 (n = 4)**  | 1.45 +/- 0.17 (n = 4) | 58, 26, 42, 45, 64, 43, 32, 53, 48 |
| NIPSNAP1 | Y261 | RGWDEN<br>VyYTVPL<br>VR/GWDE<br>NVyYTVL<br>LVR | 4-nitrophenylphosphatase domain and non-neuronal SNAP25-like protein homolog 1    | gi 6679066  | 0.41 +/- 0.05 (n = 4) | 0.67 +/- 0.16 (n = 2)   | 1.08 +/- 0.1 (n = 7)** | 1.41 +/- 0.22 (n = 6)    | 0.38 +/- 0.05 (n = 7) | 0.53 +/- 0.16 (n = 4)   | 1.46 +/- 0.19 (n = 8)*** | 1.36 +/- 0.15 (n = 7) | 39, 63, 27, 41, 37, 49, 45, 41     |
| NIPSNAP1 | Y148 | EyLEFR                                         | 4-nitrophenylphosphatase domain and non-neuronal SNAP25-like protein homolog 1    | gi 6679066  | n.d.                  | n.d.                    | 0.91 +/- 0.04 (n = 4)  | 1.09 +/- 0.1 (n = 4)     | n.d.                  | n.d.                    | n.d.                     | n.d.                  | 23                                 |
| ACAT1    | Y328 | IAAFADA<br>AVDPIDF<br>PLAPAyA<br>VPK           | acetyl-Coenzyme A acetyltransferase 1 precursor                                   | gi 21450129 | n.d.                  | n.d.                    | 0.96 +/- 0.07 (n = 4)  | 1.04 +/- 0.13 (n = 4)    | 0.84 +/- 0.15 (n = 4) | 0.79 +/- 0.12 (n = 2)   | 1.29 +/- 0.17 (n = 4)    | 0.98 +/- 0.11 (n = 4) | 26, 40, 38, 48                     |
| ACAA2    | Y198 | AANEAGy<br>FNEEMAP<br>IEVK                     | acetyl-Coenzyme A acyltransferase 2 (mitochondrial 3-oxoacyl-Coenzyme A thiolase) | gi 29126205 | 0.68 +/- 0.07 (n = 4) | 0.89 +/- 0.32 (n = 2)   | 1.17 (n = 1)           | 1.33 +/- 0.19 (n = 4)    | n.d.                  | n.d.                    | n.d.                     | n.d.                  | 42, 58                             |
| AFAP1L2  | Y68  | IESPEGYy<br>EEAEPFD<br>R                       | actin filament associated protein 1-like 2                                        | gi 22122607 | 0.96 +/- 0.2 (n = 2)  | 0.97 (n = 1)            | 1.08 (n = 1)           | 1.01 +/- 0.02 (n = 3)    | n.d.                  | n.d.                    | n.d.                     | n.d.                  | 31                                 |
| AFAP1L2  | Y357 | VAQQPLS<br>LVGCDVL<br>PDPSPDH<br>LySFR         | actin filament associated protein 1-like 2                                        | gi 22122607 | 0.96 +/- 0.17 (n = 4) | 0.94 +/- 0.15 (n = 3)   | 1.34 (n = 1)           | n.d.                     | n.d.                  | n.d.                    | 0.89 +/- 0.15 (n = 4)    | 1.11 +/- 0.1 (n = 4)  | 54, 56                             |
| ACSL5    | Y69  | NNDLILy<br>YFSDAK                              | acyl-CoA synthetase long-chain family member 5                                    | gi 58218988 | 0.73 +/- 0.06 (n = 6) | 1.25 +/- 0.04 (n = 3)   | 0.75 (n = 1)           | 1.22 +/- 0.27 (n = 5)    | n.d.                  | n.d.                    | n.d.                     | n.d.                  | 28, 27, 20                         |
| ACAD11   | Y323 | LAGISQG                                        | acyl-Coenzyme                                                                     | gi 74271799 | n.d.                  | n.d.                    | 0.91 +/-               | 1.1 +/-                  | 0.88 +/-              | 0.91 +/-                | 1.09 +/-                 | 1.21 +/-              | 39, 30, 31,                        |

|         |      |                                        |                                                            |             |                       |                         |                        |                          |                       |                        |                       |                        |                                                                |
|---------|------|----------------------------------------|------------------------------------------------------------|-------------|-----------------------|-------------------------|------------------------|--------------------------|-----------------------|------------------------|-----------------------|------------------------|----------------------------------------------------------------|
|         |      | VyR                                    | A dehydrogenase family, member 11                          |             |                       |                         | 0.04 (n = 7)           | 0.05 (n = 6)             | 0.08 (n = 7)          | 0.1 (n = 4)            | 0.1 (n = 4)           | 0.15 (n = 4)           | 41, 62, 42                                                     |
| ACOX1   | Y629 | YDGNVye NLFWEA K                       | acyl-Coenzyme A oxidase 1, palmitoyl                       | gi 66793429 | 0.75 +/- 0.11 (n = 4) | 1.11 +/- 0.21 (n = 2)   | 0.67 (n = 1)           | 1.28 +/- 0.15 (n = 4)    | 1.01 +/- 0.14 (n = 3) | 0.96 +/- 0.06 (n = 4)  | n.d.                  | 1.15 (n = 1)           | 36, 48, 39                                                     |
| ALDH1L1 | Y892 | DLGEAAL NEyLR                          | aldehyde dehydrogenase 1 family, member L1                 | gi 27532959 | 0.81 +/- 0.04 (n = 4) | 1.27 +/- 0.09 (n = 3)** | 0.96 (n = 1)           | n.d.                     | n.d.                  | n.d.                   | n.d.                  | n.d.                   | 63                                                             |
| ALDH1L1 | Y848 | ALyVSDK                                | aldehyde dehydrogenase 1 family, member L1                 | gi 27532959 | n.d.                  | n.d.                    | 0.92 +/- 0.07 (n = 4)  | 1.08 +/- 0.06 (n = 4)    | n.d.                  | n.d.                   | n.d.                  | n.d.                   | 27                                                             |
| ALDH1A7 | Y484 | ELGEHGL yEYTELK                        | aldehyde dehydrogenase family 1, subfamily A7              | gi 7106242  | 0.85 +/- 0.06 (n = 6) | 1.39 +/- 0.08 (n = 3)** | 0.6 +/- 0.06 (n = 7)*  | 1.42 +/- 0.05 (n = 6)*** | 0.82 +/- 0.07 (n = 7) | 1.14 +/- 0.22 (n = 4)  | 0.94 +/- 0.08 (n = 8) | 1.17 +/- 0.12 (n = 7)  | 41, 49, 37, 19, 30, 46, 16, 48, 46, 20, 23, 36, 44, 22, 48, 18 |
| ALDH6A1 | Y268 | AISFVGS NQAGEyI FER                    | aldehyde dehydrogenase family 6, subfamily A1              | gi 19527258 | 0.84 +/- 0.04 (n = 5) | 1.03 +/- 0.09 (n = 3)   | 1.05 (n = 1)           | 1.13 +/- 0.02 (n = 5)    | 0.83 +/- 0.05 (n = 4) | 1.13 +/- 0.02 (n = 2)  | n.d.                  | 1.41 (n = 1)           | 50, 53, 58, 68, 49                                             |
| ALDOB   | Y204 | YASICQQ NGLVPIV EPEVLPD GDHDLH CQyVSEK | aldolase 2, B isoform                                      | gi 21450291 | 0.69 +/- 0.08 (n = 5) | 0.81 +/- 0.12 (n = 3)   | 1.17 +/- 0.13 (n = 7)^ | 1.15 +/- 0.04 (n = 6)    | 0.94 +/- 0.11 (n = 3) | 0.97 +/- 0.07 (n = 4)  | n.d.                  | 1.29 (n = 1)           | 40, 21, 29, 74, 17, 70                                         |
| ANKS1A  | Y472 | IQSSAPQE EEEHPyEL LLTAETK              | ankyrin repeat and sterile alpha motif domain containing 1 | gi 31088892 | 0.9 +/- 0.09 (n = 2)  | 1.11 (n = 1)            | 0.94 +/- 0.06 (n = 7)  | 1.08 +/- 0.07 (n = 6)    | 0.89 +/- 0.17 (n = 3) | 1.15 +/- 0.14 (n = 4)  | n.d.                  | 0.73 (n = 1)           | 19, 18, 17, 44, 19                                             |
| ANXA2   | Y24  | LSLEGDH STPPSAyG SVKPYTN FDAER         | annexin A2                                                 | gi 6996913  | n.d.                  | n.d.                    | 1.02 +/- 0.15 (n = 7)  | 0.98 +/- 0.12 (n = 6)    | n.d.                  | n.d.                   | 0.83 +/- 0.06 (n = 4) | 1.17 +/- 0.12 (n = 4)  | 26, 31, 31                                                     |
| ARG1    | Y265 | EGLYITEE IyK                           | arginase 1, liver                                          | gi 7106255  | 0.69 +/- 0.04 (n = 4) | 1 +/- 0.03 (n = 2)*     | 0.99 +/- 0.07 (n = 7)* | 1.21 +/- 0.17 (n = 6)    | 0.76 +/- 0.08 (n = 7) | 1.29 +/- 0.25 (n = 4)^ | 0.84 +/- 0.1 (n = 4)  | 1.28 +/- 0.16 (n = 4)^ | 32, 26, 31, 29, 26, 37, 40                                     |
| ARG1    | Y218 | VMEETFS yLLGR                          | arginase 1, liver                                          | gi 7106255  | n.d.                  | n.d.                    | n.d.                   | n.d.                     | n.d.                  | n.d.                   | 0.97 +/- 0.09 (n = 4) | 1.03 +/- 0.14 (n = 4)  | 22                                                             |
| ARG1    | Y197 | yFSMTEV DK                             | arginase 1, liver                                          | gi 7106255  | 0.66 +/- 0.14 (n = 2) | 0.6 (n = 1)             | 1.11 +/- 0.05 (n = 4)^ | 1.12 +/- 0.11 (n = 5)    | 0.91 +/- 0.04 (n = 4) | 1.1 +/- 0.11 (n = 2)   | n.d.                  | 1.17 (n = 1)           | 22, 21, 22                                                     |
| ARG1    | Y188 | DVDPGEH yIIK                           | arginase 1, liver                                          | gi 7106255  | n.d.                  | n.d.                    | 0.88 +/- 0.05 (n = 4)  | 1.12 +/- 0.03 (n = 4)    | n.d.                  | n.d.                   | n.d.                  | n.d.                   | 20                                                             |
| ASS1    | Y133 | FELTCySL                               | argininosuccinate                                          | gi 6996911  | n.d.                  | n.d.                    | 0.9 +/-                | 1.12 +/-                 | 0.91 +/-              | 1.08 +/-               | n.d.                  | 1.32 (n =              | 24, 20, 16,                                                    |

|        |      |                                                                     |                                          |             |                       |                       |                        |                        |                       |                        |                        |                       |                                        |
|--------|------|---------------------------------------------------------------------|------------------------------------------|-------------|-----------------------|-----------------------|------------------------|------------------------|-----------------------|------------------------|------------------------|-----------------------|----------------------------------------|
|        |      | APQIK                                                               | synthetase                               |             |                       |                       | 0.06 (n = 7)           | 0.04 (n = 6)           | 0.09 (n = 7)          | 0.13 (n = 4)           |                        | 1)                    | 20                                     |
| ASS1   | Y322 | FAELVvY<br>GFVHSPE<br>CEFVR                                         | argininosuccinate synthetase             | gi 6996911  | 0.95 +/- 0.14 (n = 4) | 1.39 +/- 0.05 (n = 2) | 1.05 +/- 0.11 (n = 4)  | 0.84 +/- 0.26 (n = 5)  | 0.85 +/- 0.11 (n = 7) | 1.44 +/- 0.12 (n = 4)* | 0.86 +/- 0.04 (n = 8)  | 1.06 +/- 0.14 (n = 7) | 56, 66, 44, 65, 57, 59, 71             |
| ASS1   | Y29  | EQGyDVI<br>AYLANIG<br>QK                                            | argininosuccinate synthetase             | gi 6996911  | 0.82 +/- 0.17 (n = 2) | 1.24 (n = 1)          | 1.36 (n = 1)           | 0.92 +/- 0.13 (n = 3)  | 0.82 +/- 0.14 (n = 4) | 1.28 +/- 0.04 (n = 2)  | n.d.                   | 1.18 (n = 1)          | 55, 29                                 |
| ACLY   | Y672 | TTDGVyE<br>GVAIGGD<br>R/TTDGVy<br>EGVAIGG<br>DRYPGST<br>FMDHVL<br>R | ATP citrate lyase                        | gi 29293809 | 0.72 +/- 0.09 (n = 2) | 0.89 (n = 1)          | 0.75 +/- 0.09 (n = 7)  | 1.4 +/- 0.14 (n = 6)** | n.d.                  | n.d.                   | 0.9 +/- 0.12 (n = 8)   | 1.12 +/- 0.21 (n = 7) | 21, 24, 51, 48, 51                     |
| ATP11C | Y126 | SAVyIIE<br>AK                                                       | Atpase, class VI, type 11C isoform b     | gi 49355804 | n.d.                  | n.d.                  | 1.01 +/- 0.08 (n = 4)  | 0.99 +/- 0.09 (n = 4)  | n.d.                  | n.d.                   | n.d.                   | n.d.                  | 18                                     |
| AXL    | Y697 | IYNGDy<br>R                                                         | AXL receptor tyrosine kinase             | gi 31542164 | n.d.                  | n.d.                  | n.d.                   | n.d.                   | 1.03 +/- 0.09 (n = 3) | 0.88 +/- 0.07 (n = 4)  | 1.27 +/- 0.06 (n = 4)  | 0.83 +/- 0.1 (n = 4)* | 22, 20                                 |
| BHMT   | Y289 | EAYNLGV<br>R                                                        | betaine-homocysteine methyltransferase   | gi 7709990  | n.d.                  | n.d.                  | 0.93 +/- 0.05 (n = 4)  | 1.07 +/- 0.07 (n = 4)  | n.d.                  | n.d.                   | 1.05 +/- 0.09 (n = 4)  | 0.95 +/- 0.19 (n = 4) | 26, 34                                 |
| BCAR1  | Y556 | MEDVyQT<br>LVVHGQ<br>VLDSGR                                         | breast cancer anti-estrogen resistance 1 | gi 40254593 | 0.82 +/- 0.04 (n = 2) | 1.29 (n = 1)          | 0.91 +/- 0.1 (n = 4)   | 1.08 +/- 0.19 (n = 5)  | 1.15 +/- 0.08 (n = 4) | 1.16 +/- 0.01 (n = 2)  | 0.82 +/- 0.08 (n = 4)^ | 0.95 +/- 0.08 (n = 4) | 42, 51, 34, 64                         |
| BCAR1  | Y271 | GLLPNQY<br>GQEVyDT<br>PPMAVK                                        | breast cancer anti-estrogen resistance 1 | gi 40254593 | 1.05 +/- 0.1 (n = 5)  | 1.14 +/- 0.05 (n = 3) | 0.87 +/- 0.09 (n = 7)  | 1.04 +/- 0.11 (n = 6)  | 1.07 +/- 0.05 (n = 7) | 0.92 +/- 0.07 (n = 4)  | n.d.                   | 0.85 (n = 1)          | 42, 24, 56, 70, 35, 63                 |
| BCAR1  | Y414 | VLPPEVA<br>DGSVVD<br>DGVyAVP<br>PPAER                               | breast cancer anti-estrogen resistance 1 | gi 40254593 | n.d.                  | n.d.                  | 1.1 +/- 0.29 (n = 4)   | 0.9 +/- 0.25 (n = 4)   | n.d.                  | n.d.                   | n.d.                   | n.d.                  | 33                                     |
| BCAR1  | Y291 | DPLLDV<br>yDVPPSVE<br>K/GPNGR<br>DPLLDV<br>yDVPPSVE<br>K            | breast cancer anti-estrogen resistance 1 | gi 40254593 | 0.82 +/- 0.08 (n = 6) | 0.94 +/- 0.05 (n = 3) | 1.09 +/- 0.07 (n = 7)^ | 1.1 +/- 0.07 (n = 6)   | n.d.                  | n.d.                   | n.d.                   | n.d.                  | 18, 55, 24, 17, 39                     |
| BCAR1  | Y253 | HLLAPGP<br>QDIyDVPP<br>VR                                           | breast cancer anti-estrogen resistance 1 | gi 40254593 | 0.86 +/- 0.06 (n = 5) | 1.21 +/- 0.16 (n = 3) | 0.97 +/- 0.05 (n = 7)  | 1.05 +/- 0.09 (n = 6)  | 1.06 +/- 0.07 (n = 7) | 0.83 +/- 0.04 (n = 4)  | 1.03 +/- 0.09 (n = 4)  | 1.03 +/- 0.08 (n = 4) | 70, 54, 36, 40, 54, 60, 55, 66, 42, 65 |
| BCAR1  | Y391 | RPGPGTL<br>yDVPR                                                    | breast cancer anti-estrogen resistance 1 | gi 40254593 | n.d.                  | n.d.                  | 1 +/- 0.14 (n = 4)     | 1 +/- 0.22 (n = 4)     | n.d.                  | n.d.                   | n.d.                   | n.d.                  | 22, 44                                 |
| BCAR1  | Y238 | VGQGYV<br>YEAAQTE                                                   | breast cancer anti-estrogen              | gi 40254593 | 0.85 +/- 0.06 (n = 2) | 0.92 +/- 0.06 (n = 2) | 1.06 +/- 0.05 (n = 2)  | 1.07 +/- 0.07 (n = 2)  | 1.16 +/- 0.12 (n = 2) | 0.84 +/- 0.05 (n = 2)  | n.d.                   | 0.67 (n = 1)          | 92, 57, 95, 82, 97                     |

|         |           |                                             |                                                                                  |                  |                             |                              |                             |                              |                             |                                |                             |                               |                                                                        |
|---------|-----------|---------------------------------------------|----------------------------------------------------------------------------------|------------------|-----------------------------|------------------------------|-----------------------------|------------------------------|-----------------------------|--------------------------------|-----------------------------|-------------------------------|------------------------------------------------------------------------|
|         |           | QDEyDTP<br>R                                | resistance 3                                                                     |                  | 4)                          | 3)                           | 7)                          | 6)                           | 4)                          | 2)                             |                             |                               |                                                                        |
| BCAR3   | Y424      | TPPSPSP<br>WLTSEAN<br>yCELNPA<br>FAVGCDR    | breast cancer<br>anti-estrogen<br>resistance 3                                   | gi 7304925       | 0.87 +/-<br>0.11 (n =<br>6) | 1.19 +/-<br>0.28 (n =<br>3)  | 1.1 (n = 1)                 | 1.03 +/-<br>0.25 (n =<br>5)  | n.d.                        | n.d.                           | n.d.                        | n.d.                          | 36, 35, 35                                                             |
| TENC1   | Y483      | GPLDGSP<br>yAQVQR                           | C1 domain-<br>containing<br>phosphatase and<br>tensin-like<br>protein            | gi 11937228<br>8 | 0.98 +/-<br>0.05 (n =<br>6) | 1.09 +/-<br>0.1 (n = 3)      | 0.96 +/-<br>0.05 (n =<br>7) | 1.02 +/-<br>0.07 (n =<br>6)  | 0.94 +/-<br>0.03 (n =<br>4) | 1.24 +/-<br>0.23 (n =<br>2)    | 0.77 +/-<br>0.06 (n =<br>8) | 1.23 +/-<br>0.17 (n =<br>7)^  | 64, 67, 51,<br>72, 58, 35,<br>68, 33, 48,<br>60, 64, 29,<br>38, 70, 75 |
| TENC1   | Y705      | LALPTAA<br>LyGLR                            | C1 domain-<br>containing<br>phosphatase and<br>tensin-like<br>protein            | gi 11937228<br>8 | n.d.                        | n.d.                         | 1.03 +/-<br>0.09 (n =<br>7) | 0.97 +/-<br>0.05 (n =<br>6)  | 0.98 +/-<br>0.11 (n =<br>4) | 1.03 +/-<br>0.01 (n =<br>2)    | n.d.                        | 1.03 (n =<br>1)               | 61, 33, 42,<br>52                                                      |
| TENC1   | Y770      | VGEEGHE<br>GCSyAVC<br>SEGR                  | C1 domain-<br>containing<br>phosphatase and<br>tensin-like<br>protein            | gi 11937228<br>8 | 1 +/- 0.14<br>(n = 5)       | 1 +/- 0.04<br>(n = 3)        | 1.09 +/-<br>0.11 (n =<br>4) | 0.93 +/-<br>0.08 (n =<br>5)  | n.d.                        | n.d.                           | n.d.                        | n.d.                          | 37, 54, 20                                                             |
| CALM1   | Y100      | DGNyIS<br>AAELR/V<br>FDKDG<br>GyISAAEL<br>R | calmodulin 2                                                                     | gi 6680832       | 0.8 +/-<br>0.11 (n =<br>5)  | 1.51 +/-<br>0.13 (n =<br>3)* | 0.84 +/-<br>0.1 (n = 7)     | 1.1 +/-<br>0.09 (n =<br>6)   | 0.82 +/-<br>0.04 (n =<br>7) | 1.22 +/-<br>0.03 (n =<br>4)*** | 0.85 +/-<br>0.01 (n =<br>4) | 1.24 +/-<br>0.09 (n =<br>4)** | 59, 28, 24,<br>16, 16, 28,<br>16, 28, 23,<br>17                        |
| CPS1    | Y590      | SAyALGG<br>LGSGICP<br>NK                    | carbamoyl-<br>phosphate<br>synthetase 1                                          | gi 12424851<br>2 | n.d.                        | n.d.                         | 1.02 +/-<br>0.13 (n =<br>4) | 0.98 +/-<br>0.1 (n = 4)      | 0.97 +/-<br>0.07 (n =<br>4) | 1.12 +/-<br>0.01 (n =<br>2)    | n.d.                        | 0.86 (n =<br>1)               | 19, 35                                                                 |
| CPS1    | Y140      | VAGLLVL<br>NySNDYN<br>HWLGTK                | carbamoyl-<br>phosphate<br>synthetase 1                                          | gi 12424851<br>2 | n.d.                        | n.d.                         | 1.1 +/-<br>0.06 (n =<br>7)  | 0.88 +/-<br>0.12 (n =<br>6)  | n.d.                        | n.d.                           | n.d.                        | n.d.                          | 31, 38                                                                 |
| CPS1    | Y162      | VPAIyGV<br>DTR                              | carbamoyl-<br>phosphate<br>synthetase 1                                          | gi 12424851<br>2 | 0.82 +/-<br>0.03 (n =<br>6) | 1.22 +/-<br>0.14 (n =<br>3)* | 0.89 +/-<br>0.05 (n =<br>4) | 1.14 +/-<br>0.11 (n =<br>6)  | n.d.                        | n.d.                           | n.d.                        | n.d.                          | 60, 30, 26,<br>28, 19, 18,<br>38                                       |
| CPS1    | Y145<br>0 | FVHDNyV<br>IR                               | carbamoyl-<br>phosphate<br>synthetase 1                                          | gi 12424851<br>2 | n.d.                        | n.d.                         | 1.14 +/-<br>0.07 (n =<br>7) | 0.83 +/-<br>0.05 (n =<br>6)  | 0.81 +/-<br>0.06 (n =<br>4) | 1 +/-<br>0.05 (n =<br>2)       | 1.15 +/-<br>0.09 (n =<br>4) | 1.03 +/-<br>0.12 (n =<br>4)   | 35, 33, 40,<br>33, 37                                                  |
| CAR2    | Y114      | yAAELHL<br>VHWNTK                           | carbonic<br>anhydrase 2                                                          | gi 31981657      | n.d.                        | n.d.                         | 0.84 +/-<br>0.11 (n =<br>4) | 1.16 +/-<br>0.16 (n =<br>4)  | n.d.                        | n.d.                           | n.d.                        | n.d.                          | 23                                                                     |
| CAR3    | Y74       | VVFDDTy<br>DR                               | carbonic<br>anhydrase 3                                                          | gi 31982861      | 0.69 +/-<br>0.12 (n =<br>5) | 0.95 +/-<br>0.03 (n =<br>3)  | 0.94 +/-<br>0.07 (n =<br>4) | 1.39 +/-<br>0.14 (n =<br>5)^ | 0.88 +/-<br>0.09 (n =<br>7) | 1.13 +/-<br>0.03 (n =<br>4)    | n.d.                        | 1.3 (n =<br>1)                | 28, 25, 34,<br>44, 37                                                  |
| CEACAM1 | Y515      | ATETVyS<br>EVK                              | carcinoembryoni<br>c antigen-related<br>cell adhesion<br>molecule 1<br>isoform 1 | gi 85719299      | 0.89 +/-<br>0.29 (n =<br>4) | 0.98 +/-<br>0.12 (n =<br>2)  | 1.07 +/-<br>0.11 (n =<br>7) | 0.99 +/-<br>0.14 (n =<br>6)  | 1.2 +/-<br>0.13 (n =<br>7)  | 0.87 +/-<br>0.09 (n =<br>4)    | 0.78 +/-<br>0.04 (n =<br>4) | 1.01 +/-<br>0.14 (n =<br>4)   | 27, 24, 26,<br>26, 29, 50,<br>21, 25, 19,<br>24                        |
| CASKIN2 | Y253      | NTyNQTA                                     | cask-interacting                                                                 | gi 31981530      | n.d.                        | n.d.                         | 1.01 +/-                    | 0.99 +/-                     | n.d.                        | n.d.                           | n.d.                        | n.d.                          | 47                                                                     |

|        |               |                                 |                                           |                  |                          |                          |                          |                             |                          |                          |                           |                          |                           |
|--------|---------------|---------------------------------|-------------------------------------------|------------------|--------------------------|--------------------------|--------------------------|-----------------------------|--------------------------|--------------------------|---------------------------|--------------------------|---------------------------|
|        |               | LDIVNQF<br>TTSQASR              | protein 2                                 |                  |                          |                          | 0.07 (n = 4)             | 0.1 (n = 4)                 |                          |                          |                           |                          |                           |
| CAT    | Y231          | LVNADGE<br>AVyCK                | catalase                                  | gi 6753272       | 0.7 +/-<br>0.07 (n = 6)  | 0.96 +/-<br>0.05 (n = 3) | 0.88 +/-<br>0.1 (n = 4)  | 1.4 +/-<br>0.09 (n = 6)*    | n.d.                     | n.d.                     | n.d.                      | n.d.                     | 31, 48, 29,<br>38, 54     |
| CAT    | Y84           | GAGAFGy<br>FEVTHDI<br>TR        | catalase                                  | gi 6753272       | 0.76 +/-<br>0.06 (n = 2) | 1.03 (n = 1)             | 0.9 +/-<br>0.03 (n = 7)  | 1.19 +/-<br>0.04 (n = 6)*** | 0.99 +/-<br>0.12 (n = 3) | 1.02 +/-<br>0.08 (n = 4) | n.d.                      | 0.92 (n = 1)             | 30, 63, 63,<br>59         |
| CTNNA1 | Y619          | LVyDGIR                         | catenin alpha 1                           | gi 6753294       | n.d.                     | n.d.                     | 1.06 +/-<br>0.1 (n = 4)  | 0.94 +/-<br>0.1 (n = 4)     | n.d.                     | n.d.                     | n.d.                      | n.d.                     | 26                        |
| CTNNA1 | Y177          | NAGNEQ<br>DLGIQyK               | catenin alpha 1                           | gi 6753294       | n.d.                     | n.d.                     | 1.11 +/-<br>0.1 (n = 4)  | 0.89 +/-<br>0.07 (n = 4)    | n.d.                     | n.d.                     | n.d.                      | n.d.                     | 19                        |
| CTNND1 | Y96           | LNGPQDH<br>NHLLySTI<br>PR       | catenin, delta 1<br>isoform 1             | gi 83745122      | n.d.                     | n.d.                     | 1.03 +/-<br>0.11 (n = 4) | 0.97 +/-<br>0.04 (n = 4)    | n.d.                     | n.d.                     | 0.87 +/-<br>0.04 (n = 4)  | 1.13 +/-<br>0.09 (n = 4) | 32, 45                    |
| CTNND1 | Y904          | SLDNNyS<br>TLNER                | catenin, delta 1<br>isoform 1             | gi 83745122      | n.d.                     | n.d.                     | 1.02 +/-<br>0.06 (n = 4) | 0.98 +/-<br>0.07 (n = 4)    | 1.19 +/-<br>0.05 (n = 4) | 1 +/-<br>0.22 (n = 2)    | 0.87 +/-<br>0.09 (n = 8)  | 1.04 +/-<br>0.13 (n = 7) | 68, 65, 66,<br>37, 56, 68 |
| CAV1   | Y14<br>Y6     | yVDSEGH<br>LyTVPIR              | caveolin,<br>caveolae protein<br>1        | gi 6680854       | n.d.                     | n.d.                     | 1.17 +/-<br>0.37 (n = 4) | 0.83 +/-<br>0.15 (n = 4)    | n.d.                     | n.d.                     | n.d.                      | n.d.                     | 18                        |
| CGN    | Y229          | GSPGALS<br>SDELPE<br>NPySQVK    | cingulin                                  | gi 14925131<br>4 | n.d.                     | n.d.                     | 0.98 +/-<br>0.08 (n = 7) | 1.03 +/-<br>0.13 (n = 6)    | n.d.                     | n.d.                     | n.d.                      | n.d.                     | 26, 55                    |
| CLTC   | Y899          | ENPyYDS<br>R                    | clathrin, heavy<br>polypeptide (Hc)       | gi 51491845      | n.d.                     | n.d.                     | n.d.                     | n.d.                        | n.d.                     | n.d.                     | 1.32 +/-<br>0.39 (n = 4)  | 0.68 +/-<br>0.17 (n = 4) | 29                        |
| CLTC   | Y148<br>7     | TSIDAyD<br>NFDNISL<br>AQR       | clathrin, heavy<br>polypeptide (Hc)       | gi 51491845      | n.d.                     | n.d.                     | n.d.                     | n.d.                        | n.d.                     | n.d.                     | 0.92 +/-<br>0.03 (n = 4)  | 1.08 +/-<br>0.09 (n = 4) | 25                        |
| CLTC   | Y147<br>7     | SVNESLN<br>NLFITEED<br>yQALR    | clathrin, heavy<br>polypeptide (Hc)       | gi 51491845      | 0.77 +/-<br>0.19 (n = 2) | 1.59 (n = 1)             | 0.92 +/-<br>0.03 (n = 4) | 1.05 +/-<br>0.05 (n = 4)    | 1.09 +/-<br>0.07 (n = 3) | 1 +/-<br>0.03 (n = 4)    | n.d.                      | 0.73 (n = 1)             | 56, 71, 77,<br>64         |
| CLDN2  | Y194/<br>Y195 | TNy(50)y(5<br>0)DGYQA<br>QPLATR | claudin 2                                 | gi 7710004       | n.d.                     | n.d.                     | 0.97 +/-<br>0.12 (n = 4) | 1.03 +/-<br>0.06 (n = 4)    | 1 +/- 0.04<br>(n = 4)    | 0.86 +/-<br>0.03 (n = 2) | n.d.                      | 1.29 (n = 1)             | 46, 35                    |
| CLDN3  | Y197          | ILySAPR                         | claudin 3                                 | gi 6753438       | n.d.                     | n.d.                     | 1.09 +/-<br>0.12 (n = 4) | 0.91 +/-<br>0.18 (n = 4)    | 0.74 +/-<br>0.19 (n = 3) | 0.82 +/-<br>0.2 (n = 4)  | 1.06 +/-<br>0.08 (n = 8)  | 1.15 +/-<br>0.13 (n = 7) | 26, 26, 24,<br>19         |
| CDK2   | Y15           | IGEGTyG<br>VYyK                 | cyclin-dependent<br>kinase 2 isoform<br>2 | gi 7949020       | n.d.                     | n.d.                     | n.d.                     | n.d.                        | n.d.                     | n.d.                     | 0.96 +/-<br>0.11 (n = 4)  | 1.04 +/-<br>0.12 (n = 4) | 26                        |
| CKDL5  | Y171          | NLSEGNN<br>ANYTEyV<br>ATR       | cyclin-dependent<br>kinase-like 5         | gi 12424403<br>7 | 0.82 +/-<br>0.15 (n = 5) | 0.97 +/-<br>0.16 (n = 3) | 1.08 +/-<br>0.01 (n = 4) | 1.15 +/-<br>0.06 (n = 4)    | 1.1 +/-<br>0.06 (n = 4)  | 1.17 +/-<br>0.05 (n = 2) | 0.84 +/-<br>0.06 (n = 4)^ | 0.98 +/-<br>0.03 (n = 4) | 80, 25, 56,<br>53, 39     |
| CTH    | Y59           | QDFPGQS<br>SGFEySR              | cystathionase                             | gi 22122387      | 0.94 +/-<br>0.06 (n = 4) | 1.13 +/-<br>0.11 (n = 3) | 0.86 (n = 1)             | n.d.                        | n.d.                     | n.d.                     | n.d.                      | n.d.                     | 48                        |

|        |      |                                                   |                                                                                          |             |                             |                               |                               |                               |                             |                               |                               |                                |                                                                                   |
|--------|------|---------------------------------------------------|------------------------------------------------------------------------------------------|-------------|-----------------------------|-------------------------------|-------------------------------|-------------------------------|-----------------------------|-------------------------------|-------------------------------|--------------------------------|-----------------------------------------------------------------------------------|
| CTH    | Y113 | AGDEIIC<br>MDEVyG<br>GTNR                         | cystathionase                                                                            | gi 22122387 | 0.78 +/-<br>0.13 (n =<br>6) | 1.13 +/-<br>0.19 (n =<br>3)   | 1.04 +/-<br>0.08 (n =<br>7)   | 1.11 +/-<br>0.08 (n =<br>6)   | 0.78 +/-<br>0.03 (n =<br>3) | 1.14 +/-<br>0.04 (n =<br>4)** | 0.76 +/-<br>0.05 (n =<br>4)   | 1.25 +/-<br>0.2 (n =<br>4)     | 55, 43, 43,<br>52, 76, 63,<br>64                                                  |
| CYB5A  | Y11  | yYTLLEIQ<br>K                                     | cytochrome b-5                                                                           | gi 13385268 | 0.7 +/-<br>0.07 (n =<br>5)  | 1.54 +/-<br>0.14 (n =<br>3)** | 0.59 +/-<br>0.04 (n =<br>4)   | 1.25 +/-<br>0.12 (n =<br>6)** | 0.76 +/-<br>0.09 (n =<br>7) | 1.35 +/-<br>0.06 (n =<br>4)** | 0.63 +/-<br>0.06 (n =<br>8)   | 1.46 +/-<br>0.07 (n =<br>7)*** | 18, 36, 31,<br>22, 29, 25,<br>29, 31                                              |
| CYP2E1 | Y426 | YSDyFK                                            | cytochrome<br>P450, family 2,<br>subfamily e,<br>polypeptide 1                           | gi 11276065 | n.d.                        | n.d.                          | 0.62 +/-<br>0.09 (n =<br>4)   | 1.38 +/-<br>0.14 (n =<br>4)   | 0.69 +/-<br>0.04 (n =<br>4) | 1.5 +/-<br>0.12 (n =<br>2)    | n.d.                          | 1.23 (n =<br>1)                | 21, 19                                                                            |
| TEC    | Y415 | YVLDDQy<br>TSSSGAK                                | cytoplasmic<br>tyrosine kinase,<br>Dscr28C related                                       | gi 7305569  | n.d.                        | n.d.                          | n.d.                          | n.d.                          | 1.12 +/-<br>0.06 (n =<br>4) | 0.87 +/-<br>0.14 (n =<br>2)   | n.d.                          | 0.78 (n =<br>1)                | 25                                                                                |
| DDX3X  | Y104 | GRGDyDG<br>IGGR                                   | DEAD/H (Asp-<br>Glu-Ala-<br>Asp/His) box<br>polypeptide 3, X-<br>linked                  | gi 6753620  | n.d.                        | n.d.                          | 0.91 +/-<br>0.16 (n =<br>4)   | 1.09 +/-<br>0.14 (n =<br>4)   | n.d.                        | n.d.                          | n.d.                          | n.d.                           | 39                                                                                |
| DSP    | Y32  | YEMTySG<br>GGGGGG<br>GGGGGG<br>TSR                | desmoplakin<br>isoform 1                                                                 | gi 82950147 | n.d.                        | n.d.                          | 0.92 +/-<br>0.03 (n =<br>4)   | 1.08 +/-<br>0.05 (n =<br>4)   | n.d.                        | n.d.                          | n.d.                          | n.d.                           | 87                                                                                |
| ACBP   | Y29  | TQPTDEE<br>MLFySHF<br>K/LKTQPT<br>DEEMLFy<br>SHFK | acyl-CoA<br>binding protein /<br>diazepam<br>binding inhibitor<br>isoform 2              | gi 6681137  | 0.58 +/-<br>0.05 (n =<br>6) | 0.97 +/-<br>0.1 (n =<br>3)**  | 0.95 +/-<br>0.06 (n =<br>7)** | 1.48 +/-<br>0.2 (n =<br>6)*   | 0.49 +/-<br>0.05 (n =<br>7) | 1.14 +/-<br>0.23 (n =<br>4)*  | 1.05 +/-<br>0.12 (n =<br>8)** | 1.37 +/-<br>0.11 (n =<br>7)^   | 52, 43, 45,<br>29, 48, 41,<br>24, 64, 67,<br>18, 42, 49,<br>40, 31, 44,<br>32, 34 |
| DMGDH  | Y305 | DGLLFGP<br>yESQEK                                 | dimethylglycine<br>dehydrogenase<br>precursor                                            | gi 21311901 | 0.82 +/-<br>0.01 (n =<br>2) | 1.2 (n = 1)                   | 0.96 (n =<br>1)               | 1.07 +/-<br>0.07 (n =<br>3)   | n.d.                        | n.d.                          | n.d.                          | n.d.                           | 35                                                                                |
| DLG1   | Y783 | DyHFVTS<br>R                                      | discs large<br>homolog 1                                                                 | gi 40254642 | n.d.                        | n.d.                          | 1.01 +/-<br>0.14 (n =<br>4)   | 0.99 +/-<br>0.02 (n =<br>4)   | n.d.                        | n.d.                          | n.d.                          | n.d.                           | 26                                                                                |
| Dok1   | Y450 | GFSSDTA<br>LySQVQK                                | docking protein 1                                                                        | gi 31981796 | n.d.                        | n.d.                          | 1.1 +/-<br>0.08 (n =<br>7)    | 0.88 +/-<br>0.05 (n =<br>6)   | n.d.                        | n.d.                          | n.d.                          | n.d.                           | 20, 40                                                                            |
| Dok1   | Y361 | LTDSKED<br>PlyDEPEG<br>LAPAPPR                    | docking protein 1                                                                        | gi 31981796 | n.d.                        | n.d.                          | 1.11 +/-<br>0.07 (n =<br>7)   | 0.88 +/-<br>0.03 (n =<br>6)   | 0.98 +/-<br>0.07 (n =<br>4) | 1.13 +/-<br>0.13 (n =<br>2)   | n.d.                          | 0.83 (n =<br>1)                | 60, 34, 60                                                                        |
| Dok1   | Y408 | LKEEGYE<br>LPYNPAT<br>DDyAVPP<br>PR               | docking protein 1                                                                        | gi 31981796 | n.d.                        | n.d.                          | 1.11 +/-<br>0.1 (n = 4)       | 0.89 +/-<br>0.07 (n =<br>4)   | 0.97 +/-<br>0.09 (n =<br>4) | 1.1 +/-<br>0.05 (n =<br>2)    | n.d.                          | 0.91 (n =<br>1)                | 17, 33                                                                            |
| DYRK1B | Y273 | IYQyIQSR                                          | dual-specificity<br>tyrosine-(Y)-<br>phosphorylation<br>regulated kinase<br>1b isoform a | gi 6753698  | 0.82 +/-<br>0.04 (n =<br>6) | 1.06 +/-<br>0.09 (n =<br>3)*  | 1.08 +/-<br>0.04 (n =<br>7)** | 1.06 +/-<br>0.04 (n =<br>6)   | 0.96 +/-<br>0.11 (n =<br>3) | 1.05 +/-<br>0.06 (n =<br>4)   | 0.99 +/-<br>0.04 (n =<br>8)   | 1 +/-<br>0.08 (n =<br>7)       | 21, 34, 35,<br>30, 25, 31,<br>47, 26, 31,<br>34, 28, 32,<br>33, 29, 27            |
| DYRK4  | Y344 | VYTyIQSR                                          | dual-specificity                                                                         | gi 46402173 | n.d.                        | n.d.                          | 1.04 +/-                      | 0.96 +/-                      | 1.08 +/-                    | 0.97 +/-                      | 0.98 +/-                      | 0.91 +/-                       | 40, 28, 26,                                                                       |

|        |           |                                                 |                                                             |                  |                             |                                |                              |                                |                             |                                |                              |                             |                                                                    |
|--------|-----------|-------------------------------------------------|-------------------------------------------------------------|------------------|-----------------------------|--------------------------------|------------------------------|--------------------------------|-----------------------------|--------------------------------|------------------------------|-----------------------------|--------------------------------------------------------------------|
|        |           |                                                 | tyrosine-(Y)-<br>phosphorylation<br>regulated kinase<br>4   |                  |                             |                                | 0.08 (n =<br>4)              | 0.06 (n =<br>4)                | 0.07 (n =<br>7)             | 0.03 (n =<br>4)                | 0.08 (n =<br>4)              | 0.09 (n =<br>4)             | 22, 29                                                             |
| ETL4   | Y295      | NVYyELN<br>DVR                                  | enhancer trap<br>locus 4                                    | gi 12448658<br>8 | n.d.                        | n.d.                           | n.d.                         | n.d.                           | 1.01 +/-<br>0.06 (n =<br>4) | 0.97 +/-<br>0.22 (n =<br>2)    | n.d.                         | 1.03 (n =<br>1)             | 58                                                                 |
| ENO1   | Y25       | GNPTVEV<br>DLyTAK                               | enolase 2,<br>gamma neuronal                                | gi 7305027       | 0.68 +/-<br>0.03 (n =<br>4) | 1.09 +/-<br>0.04 (n =<br>3)*** | 0.83 +/-<br>0.05 (n =<br>7)^ | 1.37 +/-<br>0.07 (n =<br>6)*** | 0.87 +/-<br>0.04 (n =<br>7) | 1.17 +/-<br>0.13 (n =<br>4)    | n.d.                         | 1.22 (n =<br>1)             | 49, 24, 41,<br>37, 34, 44                                          |
| ENO1   | Y44       | AAVPSGA<br>STGIyEAL<br>ELR                      | enolase 3, beta<br>muscle                                   | gi 6679651       | 0.35 +/-<br>0.04 (n =<br>2) | 1.34 (n =<br>1)*               | 0.88 +/-<br>0.07 (n =<br>7)* | 1.3 +/-<br>0.07 (n =<br>6)**   | 0.71 +/-<br>0.06 (n =<br>7) | 1.31 +/-<br>0.06 (n =<br>4)*** | 1.03 +/-<br>0.09 (n =<br>4)* | 1.17 +/-<br>0.07 (n =<br>4) | 63, 98, 33,<br>48, 30, 79,<br>52, 53                               |
| EphA2  | Y589      | TyVDPHT<br>YEDPNQA<br>VLK                       | Eph receptor A2                                             | gi 32484983      | n.d.                        | n.d.                           | 1.14 +/-<br>0.19 (n =<br>4)  | 0.86 +/-<br>0.13 (n =<br>4)    | n.d.                        | n.d.                           | n.d.                         | n.d.                        | 32, 32                                                             |
| EphA2  | Y773      | VLEDDPE<br>ATyTTSG<br>GK                        | Eph receptor A2                                             | gi 32484983      | 0.91 +/-<br>0.24 (n =<br>4) | 0.96 +/-<br>0.11 (n =<br>2)    | 1 +/- 0.03<br>(n = 4)        | 1.09 +/-<br>0.03 (n =<br>5)    | 1.06 +/-<br>0.1 (n = 7)     | 0.9 +/-<br>0.07 (n =<br>4)     | 0.96 +/-<br>0.05 (n =<br>8)  | 1.04 +/-<br>0.04 (n =<br>7) | 46, 40, 28,<br>30, 25, 35,<br>49, 33, 38                           |
| EphB4  | Y774      | FLEENSS<br>DPTyTSSL<br>GGK                      | Eph receptor B4                                             | gi 47059093      | n.d.                        | n.d.                           | 1.03 +/-<br>0.16 (n =<br>4)  | 0.97 +/-<br>0.04 (n =<br>4)    | n.d.                        | n.d.                           | n.d.                         | n.d.                        | 29                                                                 |
| EGFR   | Y109<br>2 | YSSDPTG<br>AVTEDNI<br>DDAFLPV<br>PEyVnQS<br>VPK | epidermal growth<br>factor receptor<br>isoform 1            | gi 46560582      | 1.02 +/-<br>0.33 (n =<br>2) | 1.57 (n =<br>1)                | 1.45 (n =<br>1)              | 0.65 +/-<br>0.34 (n =<br>3)    | 1.04 +/-<br>0.18 (n =<br>3) | 0.97 +/-<br>0.15 (n =<br>4)    | n.d.                         | 1.01 (n =<br>1)             | 24, 75                                                             |
| EGFR   | Y117<br>2 | GSHQMSL<br>DNPdyQQ<br>DFFPK                     | epidermal growth<br>factor receptor<br>isoform 1            | gi 46560582      | 1.02 +/-<br>0.08 (n =<br>4) | 1.07 +/-<br>0.18 (n =<br>3)    | 1.16 +/-<br>0.24 (n =<br>4)  | 0.81 +/-<br>0.19 (n =<br>5)    | 1.03 +/-<br>0.09 (n =<br>7) | 0.93 +/-<br>0.07 (n =<br>4)    | n.d.                         | 1.09 (n =<br>1)             | 23, 26, 33,<br>58, 23, 28                                          |
| EGFR   | Y119<br>7 | GPTAENA<br>EyLR                                 | epidermal growth<br>factor receptor<br>isoform 1            | gi 46560582      | 0.87 +/-<br>0.05 (n =<br>6) | 0.8 +/-<br>0.25 (n =<br>3)     | 1.37 +/-<br>0.23 (n =<br>7)  | 0.8 +/-<br>0.11 (n =<br>6)     | 1.02 +/-<br>0.12 (n =<br>7) | 0.96 +/-<br>0.07 (n =<br>4)    | n.d.                         | 1 (n = 1)                   | 60, 48, 27,<br>51, 60, 59,<br>46, 56, 55,<br>65, 55, 53,<br>67, 62 |
| Erbin  | Y109<br>7 | RTEGDyL<br>SYR/TEG<br>DyLSYR                    | ErbB2 interacting<br>protein isoform 2                      | gi 54607112      | n.d.                        | n.d.                           | n.d.                         | n.d.                           | 1.29 +/-<br>0.1 (n = 4)     | 1.08 +/-<br>0.11 (n =<br>2)    | 0.86 +/-<br>0.09 (n =<br>8)* | 0.98 +/-<br>0.11 (n =<br>7) | 26, 24, 21,<br>21                                                  |
| eEF1A1 | Y177      | EVSTyIK                                         | eukaryotic<br>translation<br>elongation factor<br>1 alpha 1 | gi 12603232<br>9 | n.d.                        | n.d.                           | 1.03 +/-<br>0.04 (n =<br>4)  | 0.97 +/-<br>0.08 (n =<br>4)    | n.d.                        | n.d.                           | n.d.                         | n.d.                        | 18                                                                 |
| eEF1A1 | Y141      | EHALLAy<br>TLGVK                                | eukaryotic<br>translation<br>elongation factor<br>1 alpha 2 | gi 6681273       | n.d.                        | n.d.                           | 1.03 +/-<br>0.05 (n =<br>7)  | 0.97 +/-<br>0.09 (n =<br>6)    | 0.9 +/-<br>0.07 (n =<br>3)  | 0.81 +/-<br>0.12 (n =<br>4)    | 1.06 +/-<br>0.04 (n =<br>8)  | 1.08 +/-<br>0.09 (n =<br>7) | 23, 47, 19,<br>53, 46, 31,<br>54                                   |
| EIF1B  | Y30       | GDDLPA<br>GTEDyIH<br>R                          | eukaryotic<br>translation<br>initiation factor<br>1B        | gi 21312159      | 0.79 +/-<br>0.09 (n =<br>4) | 1.11 +/-<br>0.03 (n =<br>2)    | 0.92 (n =<br>1)              | 1.14 +/-<br>0.12 (n =<br>5)    | n.d.                        | n.d.                           | n.d.                         | n.d.                        | 21, 32                                                             |



|        |       |                                                                        |                                                                   |             |                       |                       |                        |                       |                       |                       |                       |                       |                                        |
|--------|-------|------------------------------------------------------------------------|-------------------------------------------------------------------|-------------|-----------------------|-----------------------|------------------------|-----------------------|-----------------------|-----------------------|-----------------------|-----------------------|----------------------------------------|
| F11R   | Y281  | VlySQPSTR                                                              | F11 receptor                                                      | gi 27734847 | n.d.                  | n.d.                  | 1.29 +/- 0.14 (n = 4)  | 0.71 +/- 0.13 (n = 4) | n.d.                  | n.d.                  | 1.08 +/- 0.11 (n = 4) | 0.92 +/- 0.18 (n = 4) | 22, 25                                 |
| FASN   | Y1248 | VAEVLAGEGHLYSR                                                         | fatty acid synthase                                               | gi 93102409 | n.d.                  | n.d.                  | 0.62 +/- 0.12 (n = 4)  | 1.38 +/- 0.21 (n = 4) | n.d.                  | n.d.                  | n.d.                  | n.d.                  | 55                                     |
| FcGR2B | Y289  | HPEALDEETEHDyQNHl                                                      | Fc receptor, IgG, low affinity IIb isoform 2                      | gi 6857783  | 1.07 +/- 0.32 (n = 2) | 1.11 (n = 1)          | 0.97 (n = 1)           | 0.93 +/- 0.19 (n = 3) | n.d.                  | n.d.                  | n.d.                  | n.d.                  | 24                                     |
| Fer    | Y715  | QEDGGVYSSSGLK                                                          | fer (fms/fps related) protein kinase, testis specific 2 isoform a | gi 83921584 | 1.06 +/- 0.16 (n = 5) | 0.89 +/- 0.27 (n = 3) | 1.01 +/- 0.05 (n = 7)  | 0.99 +/- 0.06 (n = 6) | n.d.                  | n.d.                  | n.d.                  | n.d.                  | 27, 35, 40, 31                         |
| Fer    | Y402  | VQENDGKEPPPVVNYEEDAR                                                   | fer (fms/fps related) protein kinase, testis specific 2 isoform a | gi 83921584 | 0.62 +/- 0.11 (n = 4) | 0.88 +/- 0.2 (n = 3)  | 1.16 +/- 0.15 (n = 4)^ | 1.32 +/- 0.1 (n = 4)  | 0.99 +/- 0.12 (n = 3) | 0.98 +/- 0.09 (n = 4) | n.d.                  | 1.11 (n = 1)          | 17, 56, 45, 37                         |
| FBP1   | Y245  | yVGSMVA DIHR                                                           | fructose bisphosphatase 1                                         | gi 9506589  | n.d.                  | n.d.                  | 1.01 +/- 0.06 (n = 4)  | 0.99 +/- 0.08 (n = 4) | 0.49 +/- 0.04 (n = 3) | 0.73 +/- 0.08 (n = 4) | 1.11 +/- 0.27 (n = 4) | 1.55 +/- 0.73 (n = 4) | 20, 57, 41                             |
| FBP1   | Y265  | TLVYGGI FLyPANK K/TLVYG GFLyPAN K                                      | fructose bisphosphatase 1                                         | gi 9506589  | 0.89 +/- 0.11 (n = 4) | 0.56 +/- 0.09 (n = 2) | 1.37 +/- 0.19 (n = 7)  | 0.8 +/- 0.12 (n = 6)^ | 0.88 +/- 0.12 (n = 4) | 1.32 +/- 0.02 (n = 2) | 0.95 +/- 0.07 (n = 4) | 1.02 +/- 0.11 (n = 4) | 23, 31, 23, 51, 36, 21, 38, 33, 22     |
| FBP1   | Y216  | GNIYSLN EGyAKDF DPAINEY LQR/GNIY SLNEGyA KDFDPAI NEYLQR/ GNIYSLN EGyAK | fructose bisphosphatase 1                                         | gi 9506589  | 0.93 +/- 0.2 (n = 6)  | 0.69 +/- 0.18 (n = 3) | 1.35 +/- 0.17 (n = 7)  | 0.82 +/- 0.13 (n = 6) | 0.83 +/- 0.09 (n = 3) | 0.84 +/- 0.06 (n = 4) | 1.03 +/- 0.08 (n = 4) | 1.25 +/- 0.21 (n = 4) | 20, 49, 52, 26, 45, 37, 49, 35, 48, 55 |
| FH     | Y462  | LMNESL MLVTAL NPHIGyD K                                                | fumarate hydratase 1                                              | gi 33859554 | n.d.                  | n.d.                  | 1.03 +/- 0.1 (n = 4)   | 0.97 +/- 0.17 (n = 4) | n.d.                  | n.d.                  | n.d.                  | n.d.                  | 20, 35                                 |
| FH     | Y488  | ETAIELGy LTAEQFD EWVKPK                                                | fumarate hydratase 1                                              | gi 33859554 | n.d.                  | n.d.                  | n.d.                   | n.d.                  | n.d.                  | n.d.                  | 1.21 +/- 0.19 (n = 4) | 0.79 +/- 0.1 (n = 4)  | 25                                     |
| FGD5   | Y713  | ALSTANE NDGyVD MSSFNAF ESK                                             | FYVE, RhoGEF and PH domain containing 5                           | gi 56699430 | 0.91 +/- 0 (n = 2)    | 1.48 (n = 1)          | 0.87 (n = 1)           | 0.95 +/- 0.15 (n = 3) | n.d.                  | n.d.                  | n.d.                  | n.d.                  | 40                                     |
| GPRC5C | Y386  | GPSEGAY DVILPR                                                         | G protein-coupled receptor, family C, group                       | gi 22267464 | n.d.                  | n.d.                  | n.d.                   | n.d.                  | 1.27 +/- 0.19 (n = 4) | 1.02 +/- 0.26 (n = 2) | 0.82 +/- 0.09 (n = 4) | 0.9 +/- 0.03 (n = 4)  | 53, 25                                 |

|       |       |                                               | 5, member C                                                   |             |                             |                             |                              |                              |                             |                             |                             |                             |                                          |
|-------|-------|-----------------------------------------------|---------------------------------------------------------------|-------------|-----------------------------|-----------------------------|------------------------------|------------------------------|-----------------------------|-----------------------------|-----------------------------|-----------------------------|------------------------------------------|
| GRF-1 | Y1087 | SMSSSPW<br>MPQDGF<br>DPSDyAE<br>PMDAVV<br>KPR | glucocorticoid<br>receptor DNA<br>binding factor 1            | gi 75677442 | n.d.                        | n.d.                        | 1.06 +/-<br>0.14 (n =<br>4)  | 0.94 +/-<br>0.13 (n =<br>4)  | n.d.                        | n.d.                        | n.d.                        | n.d.                        | 42                                       |
| GRF-1 | Y1105 | NEEENyS<br>VPHDSTQ<br>GK                      | glucocorticoid<br>receptor DNA<br>binding factor 1            | gi 75677442 | 0.7 +/-<br>0.06 (n =<br>4)  | 0.96 +/-<br>0.09 (n =<br>3) | 1.03 +/-<br>0.14 (n =<br>4)  | 1.3 +/-<br>0.15 (n =<br>4)   | n.d.                        | n.d.                        | n.d.                        | n.d.                        | 17, 26                                   |
| GLUD1 | Y135  | RDDGSW<br>EVIEGyR/<br>DDGSWE<br>VIEGyR        | glutamate<br>dehydrogenase 1                                  | gi 6680027  | 0.84 +/-<br>0.09 (n =<br>6) | 0.92 +/-<br>0.04 (n =<br>3) | 1.08 (n =<br>1)              | 1.23 +/-<br>0.09 (n =<br>5)  | n.d.                        | n.d.                        | n.d.                        | n.d.                        | 23, 36, 37                               |
| GLUD1 | Y512  | DIVHSG<br>AyTMER                              | glutamate<br>dehydrogenase 1                                  | gi 6680027  | 0.7 +/-<br>0.09 (n =<br>5)  | 0.72 +/-<br>0.07 (n =<br>3) | 1.21 +/-<br>0.11 (n =<br>7)* | 1.15 +/-<br>0.09 (n =<br>6)  | 0.94 +/-<br>0.05 (n =<br>4) | 1.06 +/-<br>0.01 (n =<br>2) | 1.05 +/-<br>0.09 (n =<br>4) | 0.98 +/-<br>0.1 (n =<br>4)  | 22, 32, 42,<br>52, 55, 51,<br>34         |
| GOT1  | Y264  | NFGLyNE<br>R                                  | glutamate<br>oxaloacetate<br>transaminase 1,<br>soluble       | gi 6754034  | n.d.                        | n.d.                        | 1 +/- 0.07<br>(n = 4)        | 1 +/- 0.13<br>(n = 4)        | n.d.                        | n.d.                        | n.d.                        | n.d.                        | 21                                       |
| GOT1  | Y71   | IANDNSL<br>NHEyLPIL<br>GLAEFR                 | glutamate<br>oxaloacetate<br>transaminase 1,<br>soluble       | gi 6754034  | n.d.                        | n.d.                        | n.d.                         | n.d.                         | 0.72 +/-<br>0.03 (n =<br>3) | 1.24 +/-<br>0.15 (n =<br>4) | n.d.                        | 0.88 (n =<br>1)             | 68                                       |
| GOT2  | Y96   | NLDKEYL<br>PIGGLAEF<br>CK                     | glutamate<br>oxaloacetate<br>transaminase 2,<br>mitochondrial | gi 6754036  | 0.63 +/-<br>0.03 (n =<br>2) | 0.79 (n =<br>1)             | 0.96 +/-<br>0.04 (n =<br>4)* | 1.22 +/-<br>0.11 (n =<br>5)  | 0.89 +/-<br>0.05 (n =<br>4) | 1.06 +/-<br>0.29 (n =<br>2) | n.d.                        | 1.31 (n =<br>1)             | 23, 32, 20                               |
| GOT2  | Y284  | NMGLyGE<br>R                                  | glutamate<br>oxaloacetate<br>transaminase 2,<br>mitochondrial | gi 6754036  | n.d.                        | n.d.                        | 0.84 +/-<br>0.06 (n =<br>4)  | 1.16 +/-<br>0.07 (n =<br>4)  | n.d.                        | n.d.                        | n.d.                        | n.d.                        | 29                                       |
| GLUL  | Y336  | GyFEDR/K<br>GyFEDR                            | glutamine<br>synthetase                                       | gi 31982332 | 0.55 +/-<br>0.21 (n =<br>2) | 0.65 (n =<br>1)             | 0.78 +/-<br>0.07 (n =<br>4)  | 1.43 +/-<br>0.12 (n =<br>5)* | n.d.                        | n.d.                        | n.d.                        | n.d.                        | 20, 26                                   |
| GPX1  | Y147  | yIIWSPVC<br>R                                 | glutathione<br>peroxidase 1                                   | gi 84871986 | n.d.                        | n.d.                        | 0.96 +/-<br>0.03 (n =<br>7)  | 1.05 +/-<br>0.03 (n =<br>6)  | 0.88 +/-<br>0.05 (n =<br>7) | 1.04 +/-<br>0.03 (n =<br>4) | 1 +/- 0.06<br>(n = 8)       | 1.1 +/-<br>0.08 (n =<br>7)  | 47, 42, 46,<br>44, 48, 24                |
| GSTM1 | Y23   | MLLEyTD<br>SSYDEK                             | glutathione S-<br>transferase, mu 1                           | gi 6754084  | 0.88 +/-<br>0.08 (n =<br>6) | 1.08 +/-<br>0.17 (n =<br>3) | 0.89 +/-<br>0.05 (n =<br>4)  | 1.15 +/-<br>0.07 (n =<br>6)^ | n.d.                        | n.d.                        | n.d.                        | n.d.                        | 37, 23, 51,<br>30                        |
| GSTP1 | Y109  | YVTLyTN<br>YEN GK                             | glutathione S-<br>transferase, pi 1                           | gi 10092608 | 1.18 +/-<br>0.35 (n =<br>2) | 1.39 (n =<br>1)             | 1.23 (n =<br>1)              | 0.67 +/-<br>0.03 (n =<br>3)  | n.d.                        | n.d.                        | n.d.                        | n.d.                        | 43                                       |
| GSTP1 | Y64   | FEDGDLT<br>LyQSNAIL<br>R                      | glutathione S-<br>transferase, pi 1                           | gi 10092608 | 0.79 +/-<br>0.13 (n =<br>4) | 1.26 +/-<br>0.3 (n = 3)     | 1.07 +/-<br>0.08 (n =<br>4)  | 0.95 +/-<br>0.08 (n =<br>4)  | 1.24 +/-<br>0.21 (n =<br>7) | 1.86 +/-<br>0.28 (n =<br>4) | 0.6 +/-<br>0.05 (n =<br>8)* | 0.72 +/-<br>0.11 (n =<br>7) | 51, 50, 30,<br>37, 38, 34,<br>18, 45, 49 |
| GAPDH | Y316  | LISWYDN<br>EyGYSNR                            | glyceraldehyde-<br>3-phosphate<br>dehydrogenase               | gi 6679937  | n.d.                        | n.d.                        | 0.72 +/-<br>0.06 (n =<br>4)  | 1.28 +/-<br>0.13 (n =<br>4)  | 0.91 +/-<br>0.07 (n =<br>4) | 1.02 +/-<br>0.1 (n =<br>2)  | n.d.                        | 1.3 (n =<br>1)              | 57, 56                                   |

|        |              |                              |                                                                          |             |                             |                              |                              |                              |                             |                             |                               |                               |                                                                                              |
|--------|--------------|------------------------------|--------------------------------------------------------------------------|-------------|-----------------------------|------------------------------|------------------------------|------------------------------|-----------------------------|-----------------------------|-------------------------------|-------------------------------|----------------------------------------------------------------------------------------------|
| GAPDH  | Y328         | VVDLMA<br>yMASK              | glyceraldehyde-<br>3-phosphate<br>dehydrogenase                          | gi 6679937  | n.d.                        | n.d.                         | 0.92 +/-<br>0.2 (n = 4)      | 1.08 +/-<br>0.19 (n =<br>4)  | n.d.                        | n.d.                        | n.d.                          | n.d.                          | 33                                                                                           |
| GNMT   | Y22          | SLGVAAE<br>GLPDQyA<br>DGEAAR | glycine N-<br>methyltransferas<br>e                                      | gi 6754026  | 0.76 +/-<br>0.05 (n =<br>5) | 1.21 +/-<br>0.12 (n =<br>3)* | 0.83 (n =<br>1)              | 1.25 +/-<br>0.04 (n =<br>3)^ | 0.9 +/-<br>0.05 (n =<br>4)  | 1.16 +/-<br>0.09 (n =<br>2) | n.d.                          | 1.05 (n =<br>1)               | 45, 58, 53,<br>37                                                                            |
| GNMT   | Y221         | AHMVTL<br>DyTVQVP<br>GTGR    | glycine N-<br>methyltransferas<br>e                                      | gi 6754026  | 0.69 +/-<br>0.02 (n =<br>4) | 1.12 +/-<br>0.2 (n = 3)      | 1 +/- 0.04<br>(n = 7)**      | 1.14 +/-<br>0.05 (n =<br>6)^ | 0.84 +/-<br>0.09 (n =<br>7) | 1.2 +/-<br>0.08 (n =<br>4)* | 0.9 +/-<br>0.02 (n =<br>4)    | 1.17 +/-<br>0.05 (n =<br>4)** | 70, 61, 73,<br>76, 53, 72,<br>69                                                             |
| GNMT   | Y34          | VWQLyIG<br>DTR               | glycine N-<br>methyltransferas<br>e                                      | gi 6754026  | 0.81 +/-<br>0.07 (n =<br>6) | 1.18 +/-<br>0.05 (n =<br>3)* | 0.98 +/-<br>0.07 (n =<br>7)  | 1.11 +/-<br>0.05 (n =<br>6)  | 1.04 +/-<br>0.05 (n =<br>7) | 1.25 +/-<br>0.19 (n =<br>4) | 0.69 +/-<br>0.01 (n =<br>4)** | 0.99 +/-<br>0.07 (n =<br>4)*  | 50, 41, 34,<br>40, 44, 40,<br>60, 49, 41,<br>42, 47, 47,<br>34, 40, 42                       |
| GSK3B  | Y216         | GEPNVSI<br>CSR               | glycogen<br>synthase kinase 3<br>beta                                    | gi 9790077  | 0.78 +/-<br>0.04 (n =<br>6) | 0.75 +/-<br>0.05 (n =<br>3)  | 1.16 +/-<br>0.14 (n =<br>7)^ | 1.16 +/-<br>0.08 (n =<br>6)  | 0.97 +/-<br>0.02 (n =<br>7) | 1.01 +/-<br>0.04 (n =<br>4) | 1 +/- 0.05<br>(n = 8)         | 1.02 +/-<br>0.06 (n =<br>7)   | 56, 59, 60,<br>36, 53, 58,<br>49, 53, 55,<br>49, 49, 62,<br>59, 51, 54,<br>50, 56, 51,<br>60 |
| GSK3B  | Y216<br>S219 | GEPNVSI<br>CsR               | glycogen<br>synthase kinase 3<br>beta                                    | gi 9790077  | 0.72 +/-<br>0.05 (n =<br>6) | 0.81 +/-<br>0.05 (n =<br>3)  | 1.21 +/-<br>0.2 (n =<br>4)^  | 1.28 +/-<br>0.1 (n = 5)      | n.d.                        | n.d.                        | n.d.                          | n.d.                          | 33, 37, 42,<br>20, 18                                                                        |
| GAB2   | Y290         | SSLTGSET<br>DNEDVYt<br>FK    | growth factor<br>receptor bound<br>protein 2-<br>associated<br>protein 2 | gi 6753932  | n.d.                        | n.d.                         | 1.07 +/-<br>0.19 (n =<br>4)  | 0.93 +/-<br>0.05 (n =<br>4)  | n.d.                        | n.d.                        | n.d.                          | n.d.                          | 23                                                                                           |
| GCHFR  | Y45          | SVLGNNF<br>yEYYVND<br>PPR    | GTP<br>cyclohydrolase I<br>feedback<br>regulator                         | gi 28893139 | n.d.                        | n.d.                         | n.d.                         | n.d.                         | 0.92 +/-<br>0.07 (n =<br>3) | 1.03 +/-<br>0.05 (n =<br>4) | n.d.                          | 1.14 (n =<br>1)               | 31                                                                                           |
| HSPE1  | Y76          | VLLPEyG<br>GTK               | heat shock<br>protein 1<br>(chaperonin 10)                               | gi 6680309  | 0.79 +/-<br>0.04 (n =<br>5) | 0.75 +/-<br>0.06 (n =<br>3)  | 1.2 +/- 0.1<br>(n = 4)*      | 1.26 +/-<br>0.11 (n =<br>4)  | 0.82 +/-<br>0.05 (n =<br>7) | 0.92 +/-<br>0.07 (n =<br>4) | 1.16 +/-<br>0.09 (n =<br>4)*  | 1.23 +/-<br>0.04 (n =<br>4)   | 28, 24, 21,<br>38, 27, 24,<br>20                                                             |
| HSPD1  | Y243         | CEFQDAy<br>VLLSEK            | heat shock<br>protein 1<br>(chaperonin)                                  | gi 31981679 | 0.84 +/-<br>0.03 (n =<br>4) | 0.98 +/-<br>0.05 (n =<br>2)  | 1.22 (n =<br>1)*             | 1.11 +/-<br>0.08 (n =<br>4)  | 0.96 +/-<br>0.07 (n =<br>3) | 1.06 +/-<br>0.07 (n =<br>4) | n.d.                          | 0.9 (n =<br>1)                | 16, 19, 27                                                                                   |
| HSPD1  | Y385         | IQEITEQL<br>DITTSEyE<br>KEK  | heat shock<br>protein 1<br>(chaperonin)                                  | gi 31981679 | 0.62 +/-<br>0.11 (n =<br>4) | 1.59 +/-<br>0.12 (n =<br>2)* | 1.23 (n =<br>1)              | 1.02 +/-<br>0.14 (n =<br>5)  | n.d.                        | n.d.                        | n.d.                          | n.d.                          | 20, 24                                                                                       |
| HSP90A | Y285         | yIDQEELN<br>K                | heat shock<br>protein 1, alpha                                           | gi 6754254  | 0.71 +/-<br>0.07 (n =<br>4) | 1.1 +/- 0.1<br>(n = 2)^      | 0.74 (n =<br>1)              | 1.3 +/-<br>0.15 (n =<br>4)   | n.d.                        | n.d.                        | n.d.                          | n.d.                          | 31, 30                                                                                       |
| HRSP12 | Y21          | APAAIGPy<br>SQAQVQV<br>DR    | heat-responsive<br>protein 12                                            | gi 40807498 | 0.98 +/-<br>0.1 (n = 6)     | 0.87 +/-<br>0.03 (n =<br>3)  | 1 +/- 0.03<br>(n = 7)        | 1.09 +/-<br>0.06 (n =<br>6)  | 0.9 +/-<br>0.05 (n =<br>7)  | 0.98 +/-<br>0.09 (n =<br>4) | 1.03 +/-<br>0.05 (n =<br>8)   | 1.08 +/-<br>0.07 (n =<br>7)   | 73, 18, 46,<br>74, 87, 80,<br>64, 58, 48,<br>51, 91, 102                                     |
| HBA    | Y25          | IGGHGAE                      | hemoglobin                                                               | gi 6680175  | 0.9 +/-                     | 1.19 +/-                     | 0.93 +/-                     | 1.09 +/-                     | 0.99 +/-                    | 0.64 +/-                    | 1.12 +/-                      | 0.97 +/-                      | 64, 59, 43,                                                                                  |

|          |      |                                        |                                                            |                  |                             |                               |                               |                              |                             |                             |                             |                             |                                                  |
|----------|------|----------------------------------------|------------------------------------------------------------|------------------|-----------------------------|-------------------------------|-------------------------------|------------------------------|-----------------------------|-----------------------------|-----------------------------|-----------------------------|--------------------------------------------------|
|          |      | yGAEALE<br>R                           | alpha I chain                                              |                  | 0.13 (n =<br>6)             | 0.08 (n =<br>3)               | 0.16 (n =<br>7)               | 0.14 (n =<br>6)              | 0.16 (n =<br>4)             | 0.04 (n =<br>2)             | 0.09 (n =<br>8)             | 0.07 (n =<br>7)             | 37, 35, 102,<br>22, 34, 62,<br>61, 50, 42,<br>61 |
| HBD      | Y36  | LLVVyPW<br>TQR                         | hemoglobin, beta<br>adult major chain                      | gi 31982300      | n.d.                        | n.d.                          | 0.9 +/- 0.1<br>(n = 4)        | 1.1 +/-<br>0.08 (n =<br>4)   | n.d.                        | n.d.                        | 0.94 +/-<br>0.08 (n =<br>4) | 1.06 +/-<br>0.12 (n =<br>4) | 29, 37, 26                                       |
| HBD      | Y42  | yFDSFGD<br>LSSASAI<br>MGNAK            | hemoglobin, beta<br>adult major chain                      | gi 31982300      | 1.02 +/-<br>0.23 (n =<br>5) | 1.23 +/-<br>0.39 (n =<br>3)   | 0.84 +/-<br>0.09 (n =<br>4)   | 0.96 +/-<br>0.35 (n =<br>4)  | 1.01 +/-<br>0.3 (n = 4)     | 0.81 +/-<br>0.13 (n =<br>2) | n.d.                        | 1.33 (n =<br>1)             | 46, 61, 49,<br>54, 47                            |
| Hrs      | Y216 | VCEPCyE<br>QLNK                        | HGF-regulated<br>tyrosine kinase<br>substrate              | gi 31982286      | n.d.                        | n.d.                          | 0.9 +/- 0.1<br>(n = 4)        | 1.1 +/- 0.1<br>(n = 4)       | n.d.                        | n.d.                        | n.d.                        | n.d.                        | 25                                               |
| vigilin  | Y437 | MDyVEINI<br>DHK                        | high density<br>lipoprotein<br>binding protein             | gi 19527028      | 0.5 +/-<br>0.08 (n =<br>6)  | 1.16 +/-<br>0.09 (n =<br>3)** | 0.99 +/-<br>0.05 (n =<br>4)** | 1.51 +/-<br>0.39 (n =<br>5)  | 0.84 +/-<br>0.07 (n =<br>7) | 1.07 +/-<br>0.32 (n =<br>4) | 0.97 +/-<br>0.04 (n =<br>4) | 1.25 +/-<br>0.3 (n =<br>4)  | 41, 29, 29,<br>38, 41, 38,<br>49                 |
| HLAC     | Y344 | GGDyALA<br>PGSQSSE<br>MSLR             | histocompatibilit<br>y 2, D region<br>locus 1              | gi 13377895<br>5 | n.d.                        | n.d.                          | n.d.                          | n.d.                         | 1.02 +/-<br>0.1 (n = 4)     | 0.95 +/-<br>0.02 (n =<br>2) | n.d.                        | 1.03 (n =<br>1)             | 43                                               |
| H2-K1    | Y342 | GGDyALA<br>PGSQTSD<br>LSPDCK           | histocompatibilit<br>y 2, K1, K region<br>isoform 1        | gi 13392258<br>8 | n.d.                        | n.d.                          | 0.99 +/-<br>0.12 (n =<br>4)   | 1.01 +/-<br>0.17 (n =<br>4)  | 1.19 +/-<br>0.2 (n = 4)     | 1.11 +/-<br>0.25 (n =<br>2) | 0.85 +/-<br>0.06 (n =<br>8) | 1.03 +/-<br>0.1 (n =<br>7)  | 72, 49, 30,<br>46                                |
| HIPK1    | Y352 | AVCSTyL<br>QSR                         | homeodomain<br>interacting<br>protein kinase 1             | gi 6754196       | n.d.                        | n.d.                          | 0.97 +/-<br>0.05 (n =<br>7)   | 1.03 +/-<br>0.05 (n =<br>6)  | 0.86 +/-<br>0.04 (n =<br>4) | 0.84 +/-<br>0.04 (n =<br>2) | 1.1 +/-<br>0.06 (n =<br>4)* | 1.12 +/-<br>0.06 (n =<br>4) | 49, 42, 46,<br>44                                |
| HIPK3    | Y359 | TVCSTyL<br>QSR                         | homeodomain<br>interacting<br>protein kinase 3             | gi 6754200       | n.d.                        | n.d.                          | 1.01 +/-<br>0.04 (n =<br>4)   | 0.99 +/-<br>0.04 (n =<br>4)  | n.d.                        | n.d.                        | n.d.                        | n.d.                        | 40                                               |
| HGD      | Y40  | GQNNPQ<br>VCPYNly<br>AEQLSGS<br>AFTCPR | homogentisate 1,<br>2-dioxygenase                          | gi 7549763       | n.d.                        | n.d.                          | 0.9 +/-<br>0.05 (n =<br>4)    | 1.1 +/-<br>0.15 (n =<br>4)   | n.d.                        | n.d.                        | n.d.                        | n.d.                        | 68                                               |
| SgK269   | Y632 | VPIVINPN<br>AyDNLAI<br>YK              | Sugen kinase 269<br>/ hypothetical<br>protein<br>LOC244895 | gi 27370424      | 0.67 +/-<br>0.02 (n =<br>2) | 1.11 (n =<br>1)               | 0.99 +/-<br>0.06 (n =<br>4)^  | 1.15 +/-<br>0.05 (n =<br>4)^ | 0.93 +/-<br>0.06 (n =<br>7) | 0.95 +/-<br>0.1 (n =<br>4)  | 0.99 +/-<br>0.06 (n =<br>4) | 1.18 +/-<br>0.08 (n =<br>4) | 29, 41, 18,<br>26, 48                            |
| GAREM    | Y453 | TEVPyEEL<br>WLEEGKP<br>SR              | hypothetical<br>protein<br>LOC381126                       | gi 13428888<br>8 | n.d.                        | n.d.                          | 0.84 +/-<br>0.12 (n =<br>4)   | 1.16 +/-<br>0.15 (n =<br>4)  | 0.66 +/-<br>0.06 (n =<br>4) | 1.24 +/-<br>0.4 (n =<br>2)  | n.d.                        | 1.88 (n =<br>1)             | 44, 44                                           |
| MGC14839 | Y93  | TSNSTSEE<br>SDLHyAD<br>IHVLR           | hypothetical<br>protein<br>LOC66952                        | gi 13385350      | 0.97 +/-<br>0.36 (n =<br>2) | 1.63 (n =<br>1)               | 0.74 (n =<br>1)               | 0.9 +/-<br>0.08 (n =<br>3)   | n.d.                        | n.d.                        | n.d.                        | n.d.                        | 29                                               |
| CARKD    | Y81  | IGIVGGC<br>QEyTGAP<br>YFAGISA<br>LK    | hypothetical<br>protein<br>LOC69225                        | gi 21312234      | 1.07 +/-<br>0.09 (n =<br>6) | 0.92 +/-<br>0.13 (n =<br>3)   | 1.14 +/-<br>0.03 (n =<br>7)   | 0.81 +/-<br>0.14 (n =<br>6)^ | 0.98 +/-<br>0.02 (n =<br>7) | 1.04 +/-<br>0.05 (n =<br>4) | n.d.                        | 0.98 (n =<br>1)             | 66, 74, 57,<br>71, 54, 68,<br>64, 47, 40,<br>33  |
| LHPP     | Y159 | YyKETSG<br>LMLDVG<br>GYMK              | hypothetical<br>protein<br>LOC76429                        | gi 70778744      | n.d.                        | n.d.                          | 0.73 +/-<br>0.08 (n =<br>4)   | 1.27 +/-<br>0.51 (n =<br>4)  | n.d.                        | n.d.                        | n.d.                        | n.d.                        | 34                                               |

|        |                        |                                                      |                                                      |                  |                             |                             |                                |                             |                             |                             |                             |                              |                                          |
|--------|------------------------|------------------------------------------------------|------------------------------------------------------|------------------|-----------------------------|-----------------------------|--------------------------------|-----------------------------|-----------------------------|-----------------------------|-----------------------------|------------------------------|------------------------------------------|
| INMT   | Y87                    | EIIVTDyT<br>PQNLQEL<br>QK                            | indolethylamine<br>N-<br>methyltransferas<br>e       | gi 6678281       | n.d.                        | n.d.                        | 0.82 +/-<br>0.07 (n =<br>4)    | 1.18 +/-<br>0.11 (n =<br>4) | n.d.                        | n.d.                        | n.d.                        | n.d.                         | 42                                       |
| SHIP-2 | Y113<br>6              | TLSEVDy<br>APGPGR                                    | inositol<br>polyphosphate<br>phosphatase-like<br>1   | gi 33859566      | n.d.                        | n.d.                        | n.d.                           | n.d.                        | 0.91 +/-<br>0.06 (n =<br>4) | 1.33 +/-<br>0.22 (n =<br>2) | n.d.                        | 0.71 (n =<br>1)              | 52                                       |
| InsR   | Y117<br>9/Y11<br>75    | Dly(50)ET<br>Dy(50)YR/<br>Dly(50)ET<br>Dy(50)YR<br>K | insulin receptor                                     | gi 6754360       | 0.95 +/-<br>0.04 (n =<br>2) | 1.21 (n =<br>1)             | 0.75 (n =<br>1)                | 1.05 +/-<br>0.32 (n =<br>3) | 1.04 +/-<br>0.1 (n = 7)     | 1.08 +/-<br>0.15 (n =<br>4) | 0.81 +/-<br>0.04 (n =<br>8) | 1.13 +/-<br>0.13 (n =<br>7)  | 46, 24, 30,<br>36, 15, 23,<br>41, 23, 23 |
| InsR   | Y117<br>5<br>Y117<br>9 | DlyETDyY<br>RK                                       | insulin receptor                                     | gi 6754360       | n.d.                        | n.d.                        | n.d.                           | n.d.                        | 1.05 +/-<br>0.19 (n =<br>3) | 1.04 +/-<br>0.14 (n =<br>4) | n.d.                        | 0.7 (n =<br>1)               | 25                                       |
| IRS1   | Y460                   | GEEELSN<br>yICMGGK                                   | insulin receptor<br>substrate 1                      | gi 29825829      | n.d.                        | n.d.                        | n.d.                           | n.d.                        | 0.92 +/-<br>0.05 (n =<br>7) | 1.19 +/-<br>0.15 (n =<br>4) | n.d.                        | 0.8 (n =<br>1)               | 25, 22                                   |
| IRS1   | Y935                   | EETGSEEy<br>MNMDLG<br>PGR                            | insulin receptor<br>substrate 1                      | gi 29825829      | n.d.                        | n.d.                        | n.d.                           | n.d.                        | 0.85 +/-<br>0.07 (n =<br>4) | 1.25 +/-<br>0.14 (n =<br>2) | n.d.                        | 1.09 (n =<br>1)              | 42                                       |
| IRS1   | Y983                   | GDyMTM<br>QIGCPR                                     | insulin receptor<br>substrate 1                      | gi 29825829      | n.d.                        | n.d.                        | n.d.                           | n.d.                        | 0.89 +/-<br>0.07 (n =<br>4) | 1.32 +/-<br>0.19 (n =<br>2) | n.d.                        | 0.8 (n =<br>1)               | 56                                       |
| IRS2   | Y671                   | SDDyMPM<br>SPTSVSAP<br>K                             | insulin receptor<br>substrate 2                      | gi 12448707<br>3 | 0.51 +/-<br>0.04 (n =<br>4) | 1.19 +/-<br>0.83 (n =<br>2) | 1.14 +/-<br>0.07 (n =<br>4)*** | 1.2 +/- 0.1<br>(n = 5)      | 0.91 +/-<br>0.12 (n =<br>4) | 1.35 +/-<br>0.26 (n =<br>2) | 0.74 +/-<br>0.02 (n =<br>4) | 1.18 +/-<br>0.11 (n =<br>4)* | 26, 16, 17,<br>21, 25                    |
| IRS2   | Y814                   | APCSCSG<br>DNDQyVL<br>MSSPVGR                        | insulin receptor<br>substrate 2                      | gi 12448707<br>3 | 1.1 +/-<br>0.11 (n =<br>5)  | 0.97 +/-<br>0.07 (n =<br>3) | 0.99 +/-<br>0.06 (n =<br>4)    | 0.93 +/-<br>0.06 (n =<br>5) | 0.91 +/-<br>0.04 (n =<br>4) | 1.22 +/-<br>0.09 (n =<br>2) | n.d.                        | 0.91 (n =<br>1)              | 38, 43, 38,<br>41                        |
| IRS2   | Y649                   | SSSNLG<br>ADDGyMP<br>MTPGAAL<br>R                    | insulin receptor<br>substrate 2                      | gi 12448707<br>3 | 0.72 +/-<br>0.4 (n = 2)     | 0.96 (n =<br>1)             | 1.01 +/-<br>0.05 (n =<br>7)    | 1.09 +/-<br>0.13 (n =<br>6) | 0.98 +/-<br>0.05 (n =<br>4) | 1.09 +/-<br>0.07 (n =<br>2) | 0.92 +/-<br>0.05 (n =<br>4) | 1.06 +/-<br>0.16 (n =<br>4)  | 64, 54, 44,<br>60, 58, 56,<br>57         |
| ISOC1  | Y159                   | ILGIPVIIT<br>EQyPK                                   | isochorismatase<br>domain<br>containing 1            | gi 31541909      | 0.76 +/-<br>0.24 (n =<br>2) | 1.03 (n =<br>1)             | 1.05 +/-<br>0.02 (n =<br>7)    | 1.02 +/-<br>0.13 (n =<br>6) | 0.97 +/-<br>0.08 (n =<br>4) | 0.89 +/-<br>0.08 (n =<br>2) | n.d.                        | 1.33 (n =<br>1)              | 34, 21, 20,<br>20                        |
| IDH1   | Y391                   | SDyLNTF<br>EFMDK                                     | isocitrate<br>dehydrogenase 1<br>(NADP+),<br>soluble | gi 58037546      | 0.69 +/-<br>0.09 (n =<br>4) | 1.07 +/-<br>0.19 (n =<br>2) | 0.88 (n =<br>1)                | 1.3 +/-<br>0.13 (n =<br>4)  | n.d.                        | n.d.                        | n.d.                        | n.d.                         | 31, 20                                   |
| JAK2   | Y570                   | REVGdYg<br>QLHK                                      | Janus kinase 2                                       | gi 11432647<br>8 | n.d.                        | n.d.                        | 0.88 +/-<br>0.15 (n =<br>4)    | 1.12 +/-<br>0.05 (n =<br>4) | n.d.                        | n.d.                        | n.d.                        | n.d.                         | 34                                       |
| K18    | Y14                    | STTFSTNy<br>R                                        | keratin 18                                           | gi 6754482       | n.d.                        | n.d.                        | 0.8 +/-<br>0.05 (n =<br>7)     | 1.23 +/-<br>0.03 (n =<br>6) | 1.08 +/-<br>0.08 (n =<br>4) | 0.73 +/-<br>0.55 (n =<br>2) | n.d.                        | 1.22 (n =<br>1)              | 37, 19, 26                               |
| K85    | Y236                   | DVDCAYL                                              | keratin complex                                      | gi 31980832      | n.d.                        | n.d.                        | n.d.                           | n.d.                        | 0.49 +/-                    | 2.2 +/-                     | n.d.                        | 0.63 (n =                    | 25                                       |

|           |               |                                                    |                                                                                                  |                  |                             |                             |                             |                             |                             |                             |                             |                             |                                                     |
|-----------|---------------|----------------------------------------------------|--------------------------------------------------------------------------------------------------|------------------|-----------------------------|-----------------------------|-----------------------------|-----------------------------|-----------------------------|-----------------------------|-----------------------------|-----------------------------|-----------------------------------------------------|
|           |               | R                                                  | 2, basic gene 18                                                                                 |                  |                             |                             |                             |                             | 0.11 (n = 4)                | 0.45 (n = 2)                |                             | 1)                          |                                                     |
| K8        | Y210          | DVDEAy<br>MNKVEL<br>ESR                            | keratin complex<br>2, basic, gene 8                                                              | gi 11414556<br>1 | 0.88 +/-<br>0.01 (n =<br>2) | 1.1 (n =<br>1)^             | 0.66 +/-<br>0.16 (n =<br>4) | 1.3 +/-<br>0.13 (n =<br>5)^ | n.d.                        | n.d.                        | n.d.                        | n.d.                        | 16, 20                                              |
| KIF13B    | Y172<br>2     | EGEyVVV<br>GTNK                                    | kinesin family<br>member 13B                                                                     | gi 12448716<br>3 | 1.01 +/-<br>0.26 (n =<br>2) | 0.8 (n = 1)                 | 1.08 +/-<br>0.07 (n =<br>4) | 0.98 +/-<br>0.07 (n =<br>5) | 1.05 +/-<br>0.13 (n =<br>4) | 0.92 +/-<br>0.06 (n =<br>2) | n.d.                        | 0.95 (n =<br>1)             | 24, 23, 22                                          |
| LDHA      | Y239          | QVVDsAy<br>EVIK                                    | lactate<br>dehydrogenase A                                                                       | gi 6754524       | n.d.                        | n.d.                        | 0.88 +/-<br>0.05 (n =<br>4) | 1.12 +/-<br>0.07 (n =<br>4) | n.d.                        | n.d.                        | 0.78 +/-<br>0.04 (n =<br>4) | 1.22 +/-<br>0.1 (n =<br>4)  | 23, 32, 33                                          |
| Lrrc25    | Y289          | SVDQDSQ<br>PVyCNLE<br>SLGR                         | leucine rich<br>repeat containing<br>25                                                          | gi 23346481      | 0.82 +/-<br>0.11 (n =<br>6) | 1.39 +/-<br>0.26 (n =<br>3) | 0.96 +/-<br>0.11 (n =<br>7) | 1.03 +/-<br>0.1 (n = 6)     | 1.12 +/-<br>0.13 (n =<br>4) | 0.9 +/-<br>0.11 (n =<br>2)  | n.d.                        | 0.72 (n =<br>1)             | 37, 28, 55,<br>49, 49, 58                           |
| LPP       | Y318          | SEGDTAy<br>GQQVQP<br>NTWK                          | LIM domain<br>containing<br>preferred<br>translocation<br>partner in lipoma                      | gi 31982290      | n.d.                        | n.d.                        | 0.89 +/-<br>0.03 (n =<br>4) | 1.11 +/-<br>0.06 (n =<br>4) | n.d.                        | n.d.                        | n.d.                        | n.d.                        | 34                                                  |
| CRIP2     | Y77           | GVNIGGA<br>GSYIyEKP<br>QTEAPQV<br>TGPIEVPV<br>VR   | LIM only protein<br>HLP                                                                          | gi 13195646      | n.d.                        | n.d.                        | 1.04 +/-<br>0.1 (n = 4)     | 0.96 +/-<br>0.16 (n =<br>4) | n.d.                        | n.d.                        | n.d.                        | n.d.                        | 24                                                  |
| L-plastin | Y28           | VDTDGN<br>GyISCNEL<br>NDLFK                        | lymphocyte<br>cytosolic protein<br>1                                                             | gi 31543113      | 0.81 +/-<br>0.14 (n =<br>4) | 1.13 +/-<br>0.08 (n =<br>2) | 0.95 (n =<br>1)             | 1.13 +/-<br>0.07 (n =<br>4) | n.d.                        | n.d.                        | n.d.                        | n.d.                        | 27, 61                                              |
| MDH1      | Y210          | EVGVyEA<br>LKDDSW<br>LK                            | malate<br>dehydrogenase 1,<br>NAD (soluble)                                                      | gi 31982178      | 0.48 +/-<br>0.06 (n =<br>2) | 0.79 (n =<br>1)             | 0.47 (n =<br>1)             | 1.6 +/-<br>0.09 (n =<br>3)^ | n.d.                        | n.d.                        | n.d.                        | n.d.                        | 17                                                  |
| MAGI1     | Y361          | IEDPVyG<br>VYYVDHI<br>NRK/IEDP<br>VyGVYYV<br>DHINR | membrane<br>associated<br>guanylate kinase,<br>WW and PDZ<br>domain<br>containing 1<br>isoform a | gi 34328051      | 0.84 +/-<br>0.11 (n =<br>2) | 0.82 (n =<br>1)             | 1.12 (n =<br>1)             | 1.12 +/-<br>0.15 (n =<br>3) | 1.02 +/-<br>0.07 (n =<br>7) | 0.98 +/-<br>0.04 (n =<br>4) | n.d.                        | 0.93 (n =<br>1)             | 36, 83, 60                                          |
| Met       | Y100<br>1     | SVSPTE<br>MVSNEsV<br>DyR                           | met proto-<br>oncogene                                                                           | gi 6678868       | n.d.                        | n.d.                        | 1.04 +/-<br>0.1 (n = 4)     | 0.96 +/-<br>0.09 (n =<br>4) | 1.04 +/-<br>0.04 (n =<br>4) | 0.99 +/-<br>0.2 (n =<br>2)  | n.d.                        | 0.87 (n =<br>1)             | 58, 50                                              |
| HADHA     | Y724          | FVDLyGA<br>QK                                      | mitochondrial<br>trifunctional<br>protein, alpha<br>subunit                                      | gi 33859811      | n.d.                        | n.d.                        | 1.09 +/-<br>0.05 (n =<br>4) | 0.91 +/-<br>0.07 (n =<br>4) | n.d.                        | n.d.                        | n.d.                        | n.d.                        | 18                                                  |
| ERK2      | Y185          | VADPDH<br>DHTGFLT<br>EyVATR                        | mitogen<br>activated protein<br>kinase 1                                                         | gi 6754632       | 0.78 +/-<br>0.14 (n =<br>6) | 1.14 +/-<br>0.05 (n =<br>3) | 1.12 +/-<br>0.22 (n =<br>4) | 1.08 +/-<br>0.16 (n =<br>5) | 0.85 +/-<br>0.09 (n =<br>4) | 0.88 +/-<br>0.16 (n =<br>2) | 0.95 +/-<br>0.05 (n =<br>4) | 1.25 +/-<br>0.1 (n =<br>4)^ | 61, 26, 47,<br>39, 28, 24,<br>28, 35, 30,<br>36, 59 |
| ERK2      | Y185<br>T188/ | VADPDH<br>DHTGFLt                                  | mitogen<br>activated protein                                                                     | gi 6754632       | 0.7 +/-<br>0.14 (n =        | 1.05 +/-<br>0.12 (n =       | 1.71 (n =<br>1)             | 1.19 +/-<br>0.4 (n = 5)     | n.d.                        | n.d.                        | n.d.                        | n.d.                        | 37, 21, 35,<br>23, 31, 25,                          |

|           |                 |                             |                                                                                 |             |                       |                        |                       |                       |                       |                       |                       |                       |                                                                |
|-----------|-----------------|-----------------------------|---------------------------------------------------------------------------------|-------------|-----------------------|------------------------|-----------------------|-----------------------|-----------------------|-----------------------|-----------------------|-----------------------|----------------------------------------------------------------|
|           | T183            | 50)EyVA(50)R                | kinase 1                                                                        |             | 6)                    | 3)                     |                       |                       |                       |                       |                       |                       | 24                                                             |
| p38-alpha | Y182            | HTDDEM TGyVATR              | mitogen activated protein kinase 14                                             | gi 10092590 | 0.93 +/- 0.16 (n = 6) | 1.05 +/- 0.14 (n = 3)  | 0.9 +/- 0.26 (n = 7)  | 1.16 +/- 0.42 (n = 6) | 0.95 +/- 0.09 (n = 3) | 0.98 +/- 0.14 (n = 4) | 0.92 +/- 0.12 (n = 8) | 1.12 +/- 0.17 (n = 7) | 80, 78, 72, 62, 33, 83, 64, 74, 77, 80, 81, 57, 66, 87, 75, 72 |
| p38-alpha | Y182 T180       | HTDDEMt GyVATR              | mitogen activated protein kinase 14                                             | gi 10092590 | 0.68 +/- 0.07 (n = 5) | 1.17 +/- 0.27 (n = 3)  | 1.08 +/- 0.05 (n = 4) | 1.13 +/- 0.26 (n = 6) | n.d.                  | n.d.                  | n.d.                  | n.d.                  | 50, 69, 58, 62, 69, 38, 72, 62, 71                             |
| ERK1      | Y205 T203/ T208 | IADPEHD HTGFLt(50)EyVA(50)R | mitogen activated protein kinase 3                                              | gi 21489933 | 0.79 +/- 0.11 (n = 4) | 1.09 +/- 0.11 (n = 3)  | 1.58 (n = 1)          | n.d.                  | n.d.                  | n.d.                  | n.d.                  | n.d.                  | 27                                                             |
| ERK1      | Y205            | IADPEHD HTGFLTE yVATR       | mitogen activated protein kinase 3                                              | gi 21489933 | 0.83 +/- 0.08 (n = 5) | 1.1 +/- 0.05 (n = 3)   | 1.06 +/- 0.1 (n = 4)  | 1.06 +/- 0.11 (n = 5) | 1.01 +/- 0.08 (n = 7) | 1.01 +/- 0.07 (n = 4) | 0.88 +/- 0.08 (n = 4) | 1.1 +/- 0.07 (n = 4)  | 62, 24, 67, 65, 70, 15, 22, 18, 38, 73                         |
| afadin    | Y123 0          | EyFTFPAS K                  | myeloid/lymphoid or mixed lineage-leukemia translocation to 4 homolog isoform 1 | gi 94401630 | n.d.                  | n.d.                   | n.d.                  | n.d.                  | 1 +/- 0.03 (n = 4)    | 1.1 +/- 0.19 (n = 2)  | n.d.                  | 0.81 (n = 1)          | 19                                                             |
| afadin    | Y128 5          | VyQLER                      | myeloid/lymphoid or mixed lineage-leukemia translocation to 4 homolog isoform 1 | gi 94401630 | n.d.                  | n.d.                   | n.d.                  | n.d.                  | 1.02 +/- 0.08 (n = 4) | 1.13 +/- 0.1 (n = 2)  | 0.95 +/- 0.18 (n = 4) | 0.97 +/- 0.07 (n = 4) | 15, 15                                                         |
| ATP1A1    | Y260            | GIVVyTGD R                  | Na+/K+ -ATPase alpha 1 subunit                                                  | gi 21450277 | n.d.                  | n.d.                   | 1.54 +/- 0.92 (n = 4) | 0.46 +/- 0.13 (n = 4) | n.d.                  | n.d.                  | n.d.                  | n.d.                  | 37                                                             |
| Nck1      | Y105            | LyDLNMP AFVK                | non-catalytic region of tyrosine kinase adaptor protein 1                       | gi 34328187 | 0.74 +/- 0.07 (n = 6) | 1.16 +/- 0.06 (n = 3)* | 1 +/- 0.09 (n = 7)^   | 1.18 +/- 0.18 (n = 6) | 0.75 +/- 0.07 (n = 7) | 1.08 +/- 0.17 (n = 4) | 1.02 +/- 0.09 (n = 8) | 1.18 +/- 0.12 (n = 7) | 44, 21, 23, 25, 25, 37, 33, 43, 18, 31, 37, 23, 16             |
| OAT       | Y42             | KTEQGPP SSEyIFER            | ornithine aminotransferase                                                      | gi 8393866  | 1.04 +/- 0.16 (n = 2) | 0.66 (n = 1)           | 1.02 (n = 1)          | 1.08 +/- 0.21 (n = 3) | n.d.                  | n.d.                  | n.d.                  | n.d.                  | 30                                                             |
| OTC       | Y317            | KPEEVDD EVFySPR             | ornithine transcarbamylase                                                      | gi 6679184  | n.d.                  | n.d.                   | 0.92 +/- 0.06 (n = 4) | 1.08 +/- 0.09 (n = 4) | n.d.                  | n.d.                  | n.d.                  | n.d.                  | 54                                                             |
| PAR3      | Y112 3          | EGHLM TLyAQVK               | partitioning-defective protein 3 homolog isoform 3                              | gi 15809050 | n.d.                  | n.d.                   | 1.15 +/- 0.13 (n = 4) | 0.85 +/- 0.09 (n = 4) | n.d.                  | n.d.                  | n.d.                  | n.d.                  | 53                                                             |
| PAR3      | Y107            | ERDyAEI                     | partitioning-                                                                   | gi 15809050 | 1.01 +/-              | 1.2 (n = 1)            | 1.13 +/-              | 0.85 +/-              | n.d.                  | n.d.                  | n.d.                  | n.d.                  | 52, 35                                                         |

|        |      |                  |                                                                            |             |                       |                        |                        |                          |                       |                       |                       |                        |                                                                |
|--------|------|------------------|----------------------------------------------------------------------------|-------------|-----------------------|------------------------|------------------------|--------------------------|-----------------------|-----------------------|-----------------------|------------------------|----------------------------------------------------------------|
|        | 6    | QDFHR            | defective protein 3 homolog isoform 3                                      |             | 0.07 (n = 2)          |                        | 0.07 (n = 4)           | 0.07 (n = 5)^            |                       |                       |                       |                        |                                                                |
| PXN    | Y118 | AGEEEHV ySFPNK   | paxillin isoform alpha                                                     | gi 21281693 | 1.01 +/- 0.07 (n = 6) | 0.95 +/- 0.03 (n = 3)  | 1.03 +/- 0.06 (n = 7)  | 0.99 +/- 0.07 (n = 6)    | 1.02 +/- 0.04 (n = 7) | 1.03 +/- 0.08 (n = 4) | 0.9 +/- 0.05 (n = 8)  | 1.08 +/- 0.09 (n = 7)  | 50, 36, 41, 53, 45, 44, 48, 54, 42, 24, 44, 42, 41, 54, 49, 26 |
| PRDX6  | Y89  | DINAYNG ETPTEK   | peroxiredoxin 6                                                            | gi 6671549  | 0.89 +/- 0.04 (n = 6) | 0.95 +/- 0.03 (n = 3)  | 0.89 +/- 0.02 (n = 4)  | 1.25 +/- 0.05 (n = 5)**  | n.d.                  | n.d.                  | n.d.                  | n.d.                   | 17, 35, 39, 40                                                 |
| PAH    | Y166 | QFADIAY NYR      | phenylalanine hydroxylase                                                  | gi 6679203  | n.d.                  | n.d.                   | n.d.                   | n.d.                     | 0.78 +/- 0.11 (n = 3) | 1.16 +/- 0.03 (n = 4) | n.d.                  | 1.01 (n = 1)           | 58                                                             |
| PEBP1  | Y181 | LyEQLSG K        | phosphatidylethanolamine binding protein 1                                 | gi 84794552 | n.d.                  | n.d.                   | 0.74 +/- 0.02 (n = 4)  | 1.26 +/- 0.27 (n = 4)    | n.d.                  | n.d.                  | n.d.                  | n.d.                   | 19                                                             |
| PIK3R1 | Y197 | LyEEYTR          | phosphatidylinositol 3 kinase, regulatory subunit, polypeptide 3 (p55)     | gi 31712016 | 0.86 +/- 0.08 (n = 5) | 0.81 +/- 0.01 (n = 3)  | 1.3 +/- 0.13 (n = 4)^  | 1.01 +/- 0.1 (n = 5)     | 0.77 +/- 0.13 (n = 4) | 1.07 +/- 0.18 (n = 2) | 1.27 +/- 0.16 (n = 4) | 0.92 +/- 0.02 (n = 4)  | 22, 23, 22, 18, 26                                             |
| PIK3R1 | Y310 | DQyLMW LTQK      | phosphatidylinositol 3-kinase, regulatory subunit, polypeptide 1 isoform 1 | gi 68299809 | n.d.                  | n.d.                   | n.d.                   | n.d.                     | 1.01 +/- 0.06 (n = 7) | 1.08 +/- 0.05 (n = 4) | 0.84 +/- 0.04 (n = 4) | 1.06 +/- 0.05 (n = 4)* | 18, 24, 17                                                     |
| PITPNA | Y141 | HVEAIyID IADR    | phosphatidylinositol transfer protein, alpha                               | gi 6679337  | 0.61 +/- 0.12 (n = 4) | 1.38 +/- 0.09 (n = 2)* | 0.95 +/- 0.06 (n = 7)* | 1.19 +/- 0.06 (n = 6)*   | 0.86 +/- 0.04 (n = 4) | 1.11 +/- 0.04 (n = 2) | n.d.                  | 1.33 (n = 1)           | 46, 33, 52, 61, 40                                             |
| PGM1   | Y353 | IALyETPT GWK     | phosphoglucomutase 2                                                       | gi 31980726 | 0.86 +/- 0.15 (n = 4) | 0.95 +/- 0.15 (n = 2)  | 0.92 +/- 0.03 (n = 7)  | 1.21 +/- 0.05 (n = 6)*** | 0.96 +/- 0.06 (n = 7) | 1.03 +/- 0.03 (n = 4) | n.d.                  | 1.19 (n = 1)           | 26, 17, 21, 32, 20, 23                                         |
| PGK1   | Y196 | ELNyFAK          | phosphoglycerate kinase 1                                                  | gi 70778976 | n.d.                  | n.d.                   | 0.97 +/- 0.04 (n = 4)  | 1.03 +/- 0.06 (n = 4)    | n.d.                  | n.d.                  | n.d.                  | n.d.                   | 22                                                             |
| PGAM2  | Y92  | HyGGLTG LNK      | phosphoglycerate mutase 2                                                  | gi 9256624  | n.d.                  | n.d.                   | 0.97 +/- 0.04 (n = 4)  | 1.03 +/- 0.06 (n = 4)    | n.d.                  | n.d.                  | n.d.                  | n.d.                   | 28                                                             |
| PLCG1  | Y771 | IGTAEPDy GALYEGR | phospholipase C, gamma 1                                                   | gi 41393059 | 0.7 +/- 0.03 (n = 2)  | 1.06 (n = 1)           | 0.98 +/- 0.06 (n = 7)  | 1.11 +/- 0.07 (n = 6)    | 0.97 +/- 0 (n = 4)    | 0.85 +/- 0.08 (n = 2) | 1.02 +/- 0.06 (n = 4) | 1.09 +/- 0.07 (n = 4)  | 32, 31, 30, 16, 38                                             |
| PAG    | Y414 | ESDyESIG DLQQR   | phosphoprotein associated with glycosphingolipid microdomains 1            | gi 31543456 | 0.79 +/- 0.03 (n = 2) | 1.08 (n = 1)           | 0.99 (n = 1)           | 1.11 +/- 0.14 (n = 3)    | n.d.                  | n.d.                  | n.d.                  | n.d.                   | 35                                                             |



|                  |              |                                                    |                                                                                                 |             |                             |                             |                             |                              |                             |                             |                            |                             |                           |
|------------------|--------------|----------------------------------------------------|-------------------------------------------------------------------------------------------------|-------------|-----------------------------|-----------------------------|-----------------------------|------------------------------|-----------------------------|-----------------------------|----------------------------|-----------------------------|---------------------------|
| PIPOX            | Y119         | QGIDHEy<br>LSSVDLK                                 | pipecolic acid<br>oxidase                                                                       | gi 6679507  | 0.75 +/-<br>0.13 (n =<br>2) | 1.01 (n =<br>1)             | 0.56 (n =<br>1)             | 1.31 +/-<br>0.03 (n =<br>3)* | n.d.                        | n.d.                        | n.d.                       | n.d.                        | 17                        |
| plakophilin<br>2 | Y573         | LKEQyQD<br>LQMPEER<br>/EQyQDL<br>QMPEER            | plakophilin 2                                                                                   | gi 21312960 | 0.83 +/-<br>0.1 (n = 4)     | 0.9 +/-<br>0.15 (n =<br>2)  | 1.01 +/-<br>0.19 (n =<br>4) | 1.14 +/-<br>0.1 (n = 6)      | n.d.                        | n.d.                        | n.d.                       | n.d.                        | 30, 23, 19                |
| plakophilin<br>4 | Y469         | NNyALNT<br>AATYAEP<br>YRPVQYR                      | plakophilin 4<br>isoform 1                                                                      | gi 51491821 | n.d.                        | n.d.                        | 1.06 +/-<br>0.27 (n =<br>4) | 0.94 +/-<br>0.16 (n =<br>4)  | n.d.                        | n.d.                        | n.d.                       | n.d.                        | 32                        |
| plakophilin<br>4 | Y116<br>6    | STTNyVD<br>FYSTK                                   | plakophilin 4<br>isoform 1                                                                      | gi 51491821 | n.d.                        | n.d.                        | n.d.                        | n.d.                         | 1.02 +/-<br>0.09 (n =<br>3) | 1 +/-<br>0.12 (n =<br>4)    | n.d.                       | 0.95 (n =<br>1)             | 18                        |
| PECAM-1          | Y702         | ATETVyS<br>EIR                                     | platelet/endotheli<br>al cell adhesion<br>molecule 1<br>isoform 1                               | gi 74024907 | n.d.                        | n.d.                        | 1.14 +/-<br>0.22 (n =<br>4) | 0.86 +/-<br>0.12 (n =<br>4)  | n.d.                        | n.d.                        | n.d.                       | n.d.                        | 34                        |
| PLEKHA7          | Y417         | SADDTyL<br>QLK                                     | pleckstrin<br>homology<br>domain<br>containing,<br>family A<br>member 7                         | gi 27370088 | 0.91 +/-<br>0.11 (n =<br>6) | 0.83 +/-<br>0.17 (n =<br>3) | 1.25 (n =<br>1)             | 1.16 +/-<br>0.12 (n =<br>5)  | n.d.                        | n.d.                        | n.d.                       | n.d.                        | 19, 19, 18                |
| PLEKHA7          | Y426         | DLEyLDL<br>K                                       | pleckstrin<br>homology<br>domain<br>containing,<br>family A<br>member 7                         | gi 27370088 | 1 +/- 0.25<br>(n = 2)       | 0.71 (n =<br>1)             | 1.22 (n =<br>1)             | 1.03 +/-<br>0.11 (n =<br>3)  | n.d.                        | n.d.                        | n.d.                       | n.d.                        | 32                        |
| PLEKHG1          | Y105<br>1    | IAEYSQLy<br>DQIVFR                                 | pleckstrin<br>homology<br>domain<br>containing,<br>family G (with<br>RhoGef domain)<br>member 1 | gi 84794546 | n.d.                        | n.d.                        | 1.03 +/-<br>0.03 (n =<br>4) | 0.97 +/-<br>0.03 (n =<br>4)  | 0.84 +/-<br>0.14 (n =<br>4) | 0.99 +/-<br>0.11 (n =<br>2) | 1.1 +/-<br>0.09 (n =<br>4) | 1.07 +/-<br>0.03 (n =<br>4) | 42, 24, 24,<br>38         |
| plectin 1        | Y288         | SIITYVSS<br>LyDAMPR                                | plectin 1 isoform<br>1                                                                          | gi 41322904 | n.d.                        | n.d.                        | n.d.                        | n.d.                         | 0.82 +/-<br>0.16 (n =<br>4) | 1.29 +/-<br>0.05 (n =<br>2) | n.d.                       | 1.16 (n =<br>1)             | 37                        |
| PGRMC1           | S181<br>Y180 | EGEPTV<br>y(50)s(50)<br>DDEEPPK<br>DDEEPPK<br>ETAR | progesterone<br>receptor<br>membrane<br>component                                               | gi 31980806 | 1.01 +/-<br>0.02 (n =<br>2) | 0.89 (n =<br>1)             | 1.22 (n =<br>1)             | 0.96 +/-<br>0.11 (n =<br>3)  | n.d.                        | n.d.                        | n.d.                       | n.d.                        | 31                        |
| PHB              | Y249         | KLEAAED<br>IAyQLSR                                 | prohibitin                                                                                      | gi 6679299  | 0.89 +/-<br>0.08 (n =<br>6) | 0.82 +/-<br>0.16 (n =<br>3) | 1 +/- 0.08<br>(n = 4)       | 1.24 +/-<br>0.05 (n =<br>5)^ | n.d.                        | n.d.                        | n.d.                       | n.d.                        | 27, 49, 44,<br>39, 32     |
| PROSC            | Y69          | TFGENyV<br>QELLEK                                  | proline<br>synthetase co-<br>transcribed<br>isoform a                                           | gi 16930823 | 0.89 +/-<br>0.06 (n =<br>6) | 0.9 +/- 0.1<br>(n = 3)      | 1.05 +/-<br>0.05 (n =<br>7) | 1.1 +/- 0.2<br>(n = 6)       | n.d.                        | n.d.                        | n.d.                       | n.d.                        | 33, 34, 29,<br>20, 30, 31 |

|       |                       |                                 |                                                                                                     |              |                       |                       |                        |                       |                       |                        |                       |                        |                                                    |
|-------|-----------------------|---------------------------------|-----------------------------------------------------------------------------------------------------|--------------|-----------------------|-----------------------|------------------------|-----------------------|-----------------------|------------------------|-----------------------|------------------------|----------------------------------------------------|
| PSMA2 | Y57                   | SILyDER                         | proteasome (prosome, macropain) subunit, alpha type 2                                               | gi 134031994 | n.d.                  | n.d.                  | 0.92 +/- 0.05 (n = 4)  | 1.08 +/- 0.06 (n = 4) | 0.87 +/- 0.05 (n = 4) | 0.79 +/- 0.28 (n = 2)  | 1.03 +/- 0.07 (n = 4) | 1.2 +/- 0.09 (n = 4)   | 37, 23, 24                                         |
| SHP-2 | Y62                   | IQNTGDy YDLYGGE K               | protein tyrosine phosphatase, non-receptor type 11                                                  | gi 6755228   | 0.81 +/- 0.04 (n = 6) | 0.78 +/- 0.1 (n = 3)  | 1.26 +/- 0.14 (n = 4)* | 1.15 +/- 0.04 (n = 5) | 1.01 +/- 0.06 (n = 7) | 1.04 +/- 0.08 (n = 4)  | 0.97 +/- 0.03 (n = 8) | 1 +/- 0.03 (n = 7)     | 46, 45, 46, 38, 50, 38, 57, 56, 60                 |
| SHP-2 | Y584                  | VyENVGL MQQQR                   | protein tyrosine phosphatase, non-receptor type 11                                                  | gi 6755228   | n.d.                  | n.d.                  | 0.86 +/- 0.07 (n = 7)  | 1.16 +/- 0.07 (n = 6) | 0.78 +/- 0.09 (n = 4) | 1.15 +/- 0.27 (n = 2)  | 0.8 +/- 0.04 (n = 4)  | 1.35 +/- 0.13 (n = 4)* | 43, 38, 53, 37                                     |
| PTPRA | Y825                  | VVQEYID AFSDyAN FK              | protein tyrosine phosphatase, receptor type, A                                                      | gi 6679557   | 0.73 +/- 0.09 (n = 5) | 0.86 +/- 0.11 (n = 3) | 1.32 +/- 0.19 (n = 7)^ | 0.93 +/- 0.13 (n = 6) | 0.94 +/- 0.08 (n = 7) | 0.99 +/- 0.15 (n = 4)  | 0.89 +/- 0.07 (n = 8) | 1.2 +/- 0.17 (n = 7)   | 58, 81, 75, 51, 67, 66, 59, 69, 63, 64, 48         |
| Fgr   | Y197                  | KLDTGGY yITTR                   | proto-oncogene tyrosine-protein kinase Fgr                                                          | gi 31542816  | n.d.                  | n.d.                  | 1.11 +/- 0.07 (n = 4)  | 0.89 +/- 0.11 (n = 4) | n.d.                  | n.d.                   | n.d.                  | n.d.                   | 27                                                 |
| PRP4  | Y849                  | LCDFGSA SHVADN DITPyLVS R       | PRP4 pre-mRNA processing factor 4 homolog B                                                         | gi 23956074  | 0.9 +/- 0.08 (n = 6)  | 0.8 +/- 0.02 (n = 3)  | 1.16 +/- 0.1 (n = 7)   | 1.01 +/- 0.07 (n = 6) | 1.03 +/- 0.05 (n = 7) | 0.77 +/- 0.09 (n = 4)^ | 1.1 +/- 0.07 (n = 4)  | 1.08 +/- 0.05 (n = 4)  | 24, 58, 74, 46, 33, 48, 62, 49, 57, 31, 71         |
| PCBD1 | Y70                   | LDHHPE WFNyN K                  | pterin 4 alpha carbinolamine dehydratase/dimerization cofactor of hepatocyte nuclear factor 1 alpha | gi 13384608  | n.d.                  | n.d.                  | 0.98 +/- 0.1 (n = 4)   | 1.02 +/- 0.11 (n = 4) | n.d.                  | n.d.                   | n.d.                  | n.d.                   | 17                                                 |
| FAK   | Y397                  | THAVSVS ETDDyAEI IDEEDTY TMPSTR | PTK2 protein tyrosine kinase 2                                                                      | gi 6679741   | n.d.                  | n.d.                  | 1.05 +/- 0.1 (n = 4)   | 0.95 +/- 0.1 (n = 4)  | 1.04 +/- 0.09 (n = 4) | 1.01 +/- 0.07 (n = 2)  | n.d.                  | 0.85 (n = 1)           | 72, 44                                             |
| FAK   | Y861                  | EDGSFQG PTGNQHI yQPVGKP DPAAPPK | PTK2 protein tyrosine kinase 2                                                                      | gi 6679741   | n.d.                  | n.d.                  | 1.01 +/- 0.16 (n = 4)  | 0.99 +/- 0.21 (n = 4) | n.d.                  | n.d.                   | n.d.                  | n.d.                   | 18                                                 |
| FAK   | Y576                  | YMEDSTy YK                      | PTK2 protein tyrosine kinase 2                                                                      | gi 6679741   | 0.84 +/- 0.06 (n = 6) | 0.88 +/- 0.08 (n = 3) | 1.08 +/- 0.06 (n = 7)* | 1.12 +/- 0.08 (n = 6) | 0.97 +/- 0.04 (n = 7) | 1.03 +/- 0.08 (n = 4)  | 0.9 +/- 0.07 (n = 8)  | 1.13 +/- 0.06 (n = 7)^ | 40, 32, 28, 35, 37, 40, 40, 33, 42, 34, 38, 21, 30 |
| FAK   | Y577 Y576/ T575/ S574 | YMEDs(33)t(33)y(33)yKASK        | PTK2 protein tyrosine kinase 2                                                                      | gi 6679741   | n.d.                  | n.d.                  | 1.1 +/- 0.16 (n = 4)   | 0.9 +/- 0.09 (n = 4)  | n.d.                  | n.d.                   | n.d.                  | n.d.                   | 16                                                 |
| Pyk2  | Y579                  | YIEDEDy YKASVTR                 | PTK2 protein tyrosine kinase 2                                                                      | gi 27369678  | 0.64 +/- 0.08 (n = 6) | 0.67 +/- 0.13 (n = 3) | 1.1 +/- 0.05 (n = 4)   | 1.23 +/- 0.03 (n = 6) | 0.96 +/- 0.11 (n = 7) | 1.09 +/- 0.04 (n = 4)  | n.d.                  | 0.97 (n = 1)           | 33, 22, 22, 20, 30, 27,                            |

|              |              |                                                                     |                                                             |                  |                             |                              |                              |                               |                             |                              |                              |                              |                                                         |
|--------------|--------------|---------------------------------------------------------------------|-------------------------------------------------------------|------------------|-----------------------------|------------------------------|------------------------------|-------------------------------|-----------------------------|------------------------------|------------------------------|------------------------------|---------------------------------------------------------|
|              |              | /YIEDEDy<br>YK                                                      | beta                                                        |                  | 4)                          | 2)                           | 7)**                         | 6)                            | 4)                          | 2)                           |                              |                              | 19, 36, 31,<br>36                                       |
| Pyk2         | Y807         | EAGyTEF<br>TGPPQKP<br>PR                                            | PTK2 protein<br>tyrosine kinase 2<br>beta                   | gi 27369678      | n.d.                        | n.d.                         | 0.86 +/-<br>0.05 (n =<br>4)  | 1.14 +/-<br>0.13 (n =<br>4)   | n.d.                        | n.d.                         | n.d.                         | n.d.                         | 32, 29                                                  |
| Pyk2         | Y579<br>Y580 | YIEDEDy<br>KASVTR                                                   | PTK2 protein<br>tyrosine kinase 2<br>beta                   | gi 27369678      | 0.75 +/-<br>0.11 (n =<br>5) | 0.97 +/-<br>0.11 (n =<br>3)  | 0.98 (n =<br>1)              | 1.27 +/-<br>0.14 (n =<br>5)   | n.d.                        | n.d.                         | n.d.                         | n.d.                         | 20, 17, 23                                              |
| PC           | Y118         | ENGVDA<br>VHPGyGF<br>LSER                                           | pyruvate<br>carboxylase                                     | gi 6679237       | 0.83 +/-<br>0.06 (n =<br>2) | 0.68 (n =<br>1)              | 1.08 +/-<br>0.04 (n =<br>7)^ | 1.01 +/-<br>0.04 (n =<br>6)   | 0.93 +/-<br>0.14 (n =<br>4) | 1 +/-<br>0.06 (n =<br>2)     | 1.03 +/-<br>0.04 (n =<br>4)  | 1.04 +/-<br>0.02 (n =<br>4)  | 29, 28, 51,<br>38, 20                                   |
| PDHB         | Y67          | VFLGEE<br>VAQYDG<br>AyK                                             | pyruvate<br>dehydrogenase<br>(lipoamide) beta               | gi 18152793      | 1.15 +/-<br>0.04 (n =<br>2) | 0.87 (n =<br>1)              | 1.12 (n =<br>1)              | 0.9 +/-<br>0.08 (n =<br>3)    | n.d.                        | n.d.                         | n.d.                         | n.d.                         | 40                                                      |
| RBCK1        | Y328         | NSQEAEV<br>ACPFIDST<br>ySCPGK                                       | RanBP-type and<br>C3HC4-type zinc<br>finger containing<br>1 | gi 14504623<br>9 | 0.83 +/-<br>0.05 (n =<br>4) | 1.18 +/-<br>0.04 (n =<br>3)* | 1.01 +/-<br>0.08 (n =<br>4)  | 1.03 +/-<br>0.07 (n =<br>4)   | n.d.                        | n.d.                         | n.d.                         | n.d.                         | 65, 64                                                  |
| ARHGAP2<br>7 | Y28          | AQVDDPP<br>EPVyANV<br>ER                                            | Rho GTPase<br>activating protein<br>27 isoform 1            | gi 83776555      | n.d.                        | n.d.                         | 0.9 +/-<br>0.11 (n =<br>4)   | 1.1 +/-<br>0.19 (n =<br>4)    | n.d.                        | n.d.                         | n.d.                         | n.d.                         | 35                                                      |
| RPL13A       | Y137         | FAyLGR                                                              | ribosomal protein<br>L13a                                   | gi 31981945      | n.d.                        | n.d.                         | 1.2 +/-<br>0.18 (n =<br>4)   | 0.8 +/-<br>0.18 (n =<br>4)    | n.d.                        | n.d.                         | n.d.                         | n.d.                         | 21                                                      |
| ARHGAP4<br>2 | Y342         | LWLEAM<br>DGKEPIyT<br>LPAISK                                        | RIKEN cDNA<br>9030420J04 gene                               | gi 14925949<br>3 | n.d.                        | n.d.                         | n.d.                         | n.d.                          | 0.68 +/-<br>0.21 (n =<br>4) | 1.52 +/-<br>0.14 (n =<br>2)  | n.d.                         | 1.26 (n =<br>1)              | 20                                                      |
| ARHGAP4<br>2 | Y371         | EPlyTLP<br>AIISK                                                    | RIKEN cDNA<br>9030420J04 gene                               | gi 14925949<br>3 | n.d.                        | n.d.                         | 0.97 +/-<br>0.11 (n =<br>4)  | 1.03 +/-<br>0.2 (n = 4)       | 0.84 +/-<br>0.05 (n =<br>4) | 1.17 +/-<br>0.08 (n =<br>2)  | n.d.                         | 1.31 (n =<br>1)              | 25, 30                                                  |
| ACSM3        | Y51          | IEIPEyFNF<br>AK                                                     | SA hypertension-<br>associated<br>homolog                   | gi 85810988      | n.d.                        | n.d.                         | 0.96 +/-<br>0.06 (n =<br>4)  | 1.04 +/-<br>0.02 (n =<br>4)   | n.d.                        | n.d.                         | n.d.                         | n.d.                         | 28                                                      |
| SAHH         | Y193         | FDNlyGC<br>R/SKFDNL<br>yGCR                                         | S-<br>adenosylhomocysteine<br>hydrolase                     | gi 61098092      | 0.78 +/-<br>0.07 (n =<br>6) | 1.16 +/-<br>0.07 (n =<br>3)* | 0.77 +/-<br>0.04 (n =<br>7)  | 1.41 +/-<br>0.1 (n =<br>6)*** | 0.78 +/-<br>0.06 (n =<br>7) | 1.23 +/-<br>0.18 (n =<br>4)* | 0.87 +/-<br>0.06 (n =<br>8)  | 1.24 +/-<br>0.09 (n =<br>7)* | 20, 21, 21,<br>28, 26, 22,<br>24, 35, 15,<br>24, 15, 19 |
| SEC14L4      | Y36          | ADDyFLL<br>R                                                        | SEC14 (S.<br>cerevisiae)-like 2                             | gi 22165368      | 1.08 +/-<br>0.12 (n =<br>4) | 1.03 +/-<br>0.41 (n =<br>2)  | 1.08 +/-<br>0.09 (n =<br>4)  | 0.89 +/-<br>0.02 (n =<br>6)   | 0.91 +/-<br>0.05 (n =<br>3) | 1.11 +/-<br>0.06 (n =<br>4)  | n.d.                         | 0.84 (n =<br>1)              | 29, 36, 29,<br>36                                       |
| SEC14L2      | Y36          | FRENVQD<br>VLPTLPN<br>PDDyFLL<br>R/ENVQD<br>VLPTLPN<br>PDDyFLL<br>R | SEC14-like 2                                                | gi 21362309      | n.d.                        | n.d.                         | 0.92 +/-<br>0.16 (n =<br>4)  | 1.08 +/-<br>0.21 (n =<br>4)   | 1.08 +/-<br>0.18 (n =<br>7) | 1.36 +/-<br>0.14 (n =<br>4)  | 0.69 +/-<br>0.1 (n = 4)      | 0.8 +/-<br>0.2 (n =<br>4)    | 28, 20, 34,<br>21, 25                                   |
| Sept2        | Y17          | QQPTQFI<br>NPETPGy<br>VGFANLP                                       | septin 2                                                    | gi 6754816       | n.d.                        | n.d.                         | 0.97 +/-<br>0.11 (n =<br>4)  | 1.03 +/-<br>0.05 (n =<br>4)   | 1.31 +/-<br>0.17 (n =<br>4) | 1.1 +/-<br>0.16 (n =<br>2)   | 0.71 +/-<br>0.06 (n =<br>4)* | 0.93 +/-<br>0.04 (n =<br>4)^ | 36, 17, 23                                              |

|         |      |                                    |                                                                       |                  |                             |                             |                             |                             |                             |                             |                              |                             |                           |
|---------|------|------------------------------------|-----------------------------------------------------------------------|------------------|-----------------------------|-----------------------------|-----------------------------|-----------------------------|-----------------------------|-----------------------------|------------------------------|-----------------------------|---------------------------|
|         |      | NQVHR                              |                                                                       |                  |                             |                             |                             |                             |                             |                             |                              |                             |                           |
| SHMT1   | Y67  | ySEGYPG<br>QR                      | serine<br>hydroxymethyltr<br>ansferase 1<br>(soluble)                 | gi 67846103      | n.d.                        | n.d.                        | 0.77 +/-<br>0.11 (n =<br>4) | 1.23 +/-<br>0.21 (n =<br>4) | n.d.                        | n.d.                        | n.d.                         | n.d.                        | 31                        |
| SHMT1   | Y28  | DSDAEVY<br>SIK                     | serine<br>hydroxymethyltr<br>ansferase 1<br>(soluble)                 | gi 67846103      | 0.5 +/-<br>0.03 (n =<br>2)  | 0.87 (n =<br>1)             | 0.8 +/-<br>0.05 (n =<br>4)^ | 1.39 +/-<br>0.23 (n =<br>5) | 0.72 +/-<br>0.09 (n =<br>4) | 1.22 +/-<br>0.2 (n =<br>2)  | n.d.                         | 1.66 (n =<br>1)             | 19, 21, 29                |
| SHEP1   | Y178 | TAAELEA<br>AGDYVK                  | SH2 domain<br>containing 3C                                           | gi 7305329       | 1.12 +/-<br>0.14 (n =<br>4) | 1.15 +/-<br>0.38 (n =<br>2) | 0.96 +/-<br>0.08 (n =<br>4) | 0.87 +/-<br>0.06 (n =<br>5) | n.d.                        | n.d.                        | n.d.                         | n.d.                        | 24, 27, 20                |
| ITSN2   | Y922 | GEPEALY<br>AAVTK                   | SH3 domain<br>protein 1B                                              | gi 46560563      | 0.84 +/-<br>0.08 (n =<br>6) | 1.02 +/-<br>0.39 (n =<br>3) | 1.25 (n =<br>1)             | 1.13 +/-<br>0.16 (n =<br>5) | 1.05 +/-<br>0.05 (n =<br>7) | 1 +/-<br>0.08 (n =<br>4)    | 0.84 +/-<br>0.02 (n =<br>4)  | 1.07 +/-<br>0.17 (n =<br>4) | 19, 27, 34,<br>19, 27, 24 |
| STAT3   | Y686 | yCRPESQ<br>EHPEADP<br>GSAAPYL<br>K | signal transducer<br>and activator of<br>transcription 3<br>isoform 3 | gi 22094115      | n.d.                        | n.d.                        | 1.11 +/-<br>0.22 (n =<br>4) | 0.89 +/-<br>0.29 (n =<br>4) | n.d.                        | n.d.                        | n.d.                         | n.d.                        | 22                        |
| STAP2   | Y250 | ALVPFLL<br>DEDYEK                  | signal-<br>transducing<br>adaptor protein-2                           | gi 22122357      | 0.88 +/-<br>0.13 (n =<br>4) | 1.03 +/-<br>0.11 (n =<br>2) | 1.23 +/-<br>0.14 (n =<br>4) | 0.9 +/-<br>0.44 (n =<br>5)  | 0.9 +/-<br>0.09 (n =<br>4)  | 1.17 +/-<br>0.28 (n =<br>2) | n.d.                         | 1.04 (n =<br>1)             | 43, 50, 37,<br>46         |
| SLC22A1 | Y545 | ENTLYLQV<br>QTGK                   | solute carrier<br>family 22<br>member 1                               | gi 31982010      | n.d.                        | n.d.                        | n.d.                        | n.d.                        | 1.07 +/-<br>0.09 (n =<br>4) | 1 +/-<br>0.13 (n =<br>2)    | n.d.                         | 0.71 (n =<br>1)             | 21                        |
| SLC25A5 | Y191 | AAyFGIY<br>DTAK                    | solute carrier<br>family 25,<br>member 5                              | gi 22094075      | 0.71 +/-<br>0.12 (n =<br>4) | 0.84 +/-<br>0.27 (n =<br>2) | 1.05 +/-<br>0.08 (n =<br>4) | 1.21 +/-<br>0.11 (n =<br>6) | 0.79 +/-<br>0.07 (n =<br>7) | 0.92 +/-<br>0.11 (n =<br>4) | 1.12 +/-<br>0.08 (n =<br>4)^ | 1.34 +/-<br>0.28 (n =<br>4) | 29, 25, 23,<br>36, 17, 19 |
| SLC25A5 | Y81  | yFPTQAL<br>NFAFK                   | solute carrier<br>family 25,<br>member 5                              | gi 22094075      | n.d.                        | n.d.                        | 1.2 +/- 0.1<br>(n = 4)      | 0.8 +/-<br>0.13 (n =<br>4)  | 1.02 +/-<br>0.07 (n =<br>3) | 1.14 +/-<br>0.06 (n =<br>4) | 0.9 +/-<br>0.02 (n =<br>4)   | 0.94 +/-<br>0.03 (n =<br>4) | 25, 30, 37,<br>38         |
| SCAP2   | Y260 | SQPIDDEI<br>yEELPEEE<br>EDTASVK    | src family<br>associated<br>phosphoprotein 2                          | gi 9055324       | 0.88 +/-<br>0.16 (n =<br>4) | 1.14 +/-<br>0.22 (n =<br>2) | 1.17 +/-<br>0.16 (n =<br>4) | 0.91 +/-<br>0.14 (n =<br>5) | 1.1 +/-<br>0.35 (n =<br>3)  | 1.05 +/-<br>0.21 (n =<br>4) | n.d.                         | 0.5 (n =<br>1)              | 29, 37, 50,<br>40         |
| SHF     | Y64  | LPEDDER<br>PPEEYDQP<br>WEWK        | Src homology 2<br>domain<br>containing F                              | gi 11118592<br>4 | 0.39 +/-<br>0.04 (n =<br>2) | 0.84 (n =<br>1)             | 1.07 +/-<br>0.19 (n =<br>4) | 1.22 +/-<br>0.14 (n =<br>5) | n.d.                        | n.d.                        | n.d.                         | n.d.                        | 18, 18                    |
| Shb     | Y432 | LPQDDDR<br>PADEYDQ<br>PWEWNR       | src homology 2<br>domain-<br>containing<br>transforming<br>protein B  | gi 14925237<br>7 | 0.76 +/-<br>0.2 (n = 5)     | 0.96 +/-<br>0.25 (n =<br>3) | 1.07 +/-<br>0.11 (n =<br>4) | 1.17 +/-<br>0.12 (n =<br>6) | 1.13 +/-<br>0.19 (n =<br>3) | 0.86 +/-<br>0.24 (n =<br>4) | n.d.                         | 1.17 (n =<br>1)             | 20, 54, 36,<br>28, 43, 53 |
| Shb     | Y342 | VTIADY<br>SDPFDK                   | src homology 2<br>domain-<br>containing<br>transforming<br>protein B  | gi 14925237<br>7 | 0.77 +/-<br>0.21 (n =<br>4) | 1.13 +/-<br>0.42 (n =<br>2) | 1.02 +/-<br>0.09 (n =<br>7) | 1.09 +/-<br>0.06 (n =<br>6) | 1.11 +/-<br>0.16 (n =<br>3) | 0.92 +/-<br>0.12 (n =<br>4) | n.d.                         | 0.97 (n =<br>1)             | 40, 48, 36,<br>19, 30, 43 |
| Shb     | Y364 | GESAGyM<br>EPYEAQR                 | src homology 2<br>domain-<br>containing                               | gi 14925237<br>7 | 0.85 +/-<br>0.21 (n =<br>2) | 1.06 (n =<br>1)             | 1.01 (n =<br>1)             | 1.08 +/-<br>0.12 (n =<br>3) | n.d.                        | n.d.                        | n.d.                         | n.d.                        | 32                        |

|          |       |                                                  |                                                         |              |                       |                        |                        |                         |                       |                       |                       |                        |                                        |
|----------|-------|--------------------------------------------------|---------------------------------------------------------|--------------|-----------------------|------------------------|------------------------|-------------------------|-----------------------|-----------------------|-----------------------|------------------------|----------------------------------------|
|          |       |                                                  | transforming protein B                                  |              |                       |                        |                        |                         |                       |                       |                       |                        |                                        |
| Shc1     | Y313  | ELFDDPSy<br>VNIQNLD<br>K                         | src homology 2 domain-containing transforming protein C | gi 15778828  | 0.7 +/- 0.02 (n = 6)  | 1.01 +/- 0.13 (n = 3)* | 1.14 +/- 0.23 (n = 4)^ | 1.2 +/- 0.14 (n = 6)    | 0.89 +/- 0.07 (n = 7) | 1.12 +/- 0.07 (n = 4) | 0.83 +/- 0.1 (n = 8)  | 1.23 +/- 0.07 (n = 7)* | 38, 40, 41, 53, 56, 27, 39, 43, 47, 46 |
| SND1     | Y908  | ADDADEF<br>GySR                                  | staphylococcal nuclease domain containing 1             | gi 77404392  | 0.58 +/- 0.04 (n = 4) | 1.07 +/- 0.14 (n = 3)* | 0.83 +/- 0.1 (n = 4)^  | 1.55 +/- 0.08 (n = 4)** | n.d.                  | n.d.                  | n.d.                  | n.d.                   | 65, 37                                 |
| SND1     | Y109  | EyGMIYL<br>GK                                    | staphylococcal nuclease domain containing 1             | gi 77404392  | 0.58 +/- 0.21 (n = 2) | 0.75 (n = 1)           | 1.13 +/- 0.12 (n = 4)  | 1.15 +/- 0.14 (n = 4)   | 0.99 +/- 0.08 (n = 7) | 0.93 +/- 0.21 (n = 4) | n.d.                  | 1.36 (n = 1)           | 17, 24, 20, 19                         |
| SCP2     | Y197  | HSVNNTy<br>SQFQDEY<br>SLEEVMK                    | sterol carrier protein 2, liver                         | gi 45476581  | n.d.                  | n.d.                   | 0.93 +/- 0.05 (n = 4)  | 1.07 +/- 0.12 (n = 4)   | n.d.                  | n.d.                  | n.d.                  | n.d.                   | 50                                     |
| ST5      | Y498  | ENPyEDV<br>DLK                                   | suppression of tumorigenicity 5 isoform 1               | gi 47679093  | 0.62 +/- 0.06 (n = 4) | 0.69 +/- 0.09 (n = 2)  | 1.41 +/- 0.16 (n = 4)* | 1.08 +/- 0.15 (n = 6)   | n.d.                  | n.d.                  | n.d.                  | n.d.                   | 43, 33, 35                             |
| ST5      | Y485  | STLEENA<br>yEDIVGG<br>LPK                        | suppression of tumorigenicity 5 isoform 1               | gi 47679093  | 0.69 +/- 0.07 (n = 2) | 1.19 (n = 1)           | 0.87 (n = 1)           | 1.19 +/- 0.2 (n = 3)    | n.d.                  | n.d.                  | n.d.                  | n.d.                   | 32                                     |
| DLG3     | Y705  | DNEVDG<br>QDyHFVV<br>SR/RDNE<br>VDGQDyH<br>FVVSr | synapse-associated protein 102                          | gi 7949129   | 0.91 +/- 0.35 (n = 2) | 1.21 (n = 1)           | 1.2 +/- 0.18 (n = 4)   | 0.83 +/- 0.09 (n = 5)   | 1.11 +/- 0.16 (n = 4) | 0.93 +/- 0.05 (n = 2) | n.d.                  | 0.71 (n = 1)           | 38, 61, 51                             |
| tal1     | Y26   | TMQFEPS<br>TMVyDAC<br>R                          | tal1                                                    | gi 6755809   | n.d.                  | n.d.                   | n.d.                   | n.d.                    | n.d.                  | n.d.                  | 0.93 +/- 0.09 (n = 4) | 1.07 +/- 0.07 (n = 4)  | 28                                     |
| tal1     | Y1116 | LLGEIAQ<br>GNENyAG<br>IAAR                       | tal1                                                    | gi 6755809   | 0.65 +/- 0 (n = 2)    | 0.93 (n = 1)           | 1.15 +/- 0.17 (n = 4)  | 1.05 +/- 0.05 (n = 4)   | 1.07 +/- 0.13 (n = 4) | 1.39 +/- 0.15 (n = 2) | 0.83 +/- 0.15 (n = 4) | 0.91 +/- 0.03 (n = 4)  | 55, 34, 48, 65                         |
| tal1     | Y1665 | ECDySIDG<br>INR                                  | tal1                                                    | gi 124486957 | 0.98 +/- 0.12 (n = 4) | 1.04 +/- 0.07 (n = 3)  | 0.97 (n = 1)           | n.d.                    | n.d.                  | n.d.                  | n.d.                  | n.d.                   | 47                                     |
| tensin 1 | Y1593 | ySMPDNS<br>PETR                                  | tensin 1                                                | gi 94363487  | 0.45 +/- 0.09 (n = 2) | 0.64 (n = 1)           | 1.02 +/- 0.09 (n = 7)* | 1.22 +/- 0.14 (n = 6)   | 1.22 +/- 0.12 (n = 4) | 1.3 +/- 0.06 (n = 2)  | 0.88 +/- 0.17 (n = 4) | 0.75 +/- 0.12 (n = 4)  | 49, 60, 38, 46, 26                     |
| tensin 1 | Y1480 | HAAyGGy<br>STPEDR                                | tensin 1                                                | gi 94363487  | 0.72 +/- 0.15 (n = 4) | 0.93 +/- 0.12 (n = 2)  | 1.09 +/- 0.08 (n = 4)  | 1.15 +/- 0.13 (n = 6)   | n.d.                  | n.d.                  | n.d.                  | n.d.                   | 64, 61, 57                             |
| tensin 1 | Y537  | EDGMEE<br>VVGHTQ<br>GPLDGSL<br>yAK               | tensin 1                                                | gi 94363487  | 0.67 +/- 0.16 (n = 4) | 0.99 +/- 0.46 (n = 2)  | 0.99 +/- 0.22 (n = 4)  | 1.27 +/- 0.24 (n = 5)   | 1.04 +/- 0.15 (n = 7) | 0.91 +/- 0.08 (n = 4) | 1.03 +/- 0.1 (n = 4)  | 1 +/- 0.03 (n = 4)     | 34, 42, 37, 25, 60, 39, 17             |
| tensin 1 | Y1558 | AGSLPNy<br>ATINGK                                | tensin 1                                                | gi 94363487  | 1.08 +/- 0.06 (n = 4) | 1.13 +/- 0.08 (n = 3)  | 0.92 +/- 0.04 (n = 7)  | 0.98 +/- 0.07 (n = 6)   | 1.08 +/- 0.06 (n = 4) | 0.96 +/- 0.07 (n = 2) | n.d.                  | 0.76 (n = 1)           | 34, 22, 34, 36                         |

|          |                                         |                                                |                                          |              |                       |                      |                         |                        |                       |                       |                        |                       |                                                                                    |
|----------|-----------------------------------------|------------------------------------------------|------------------------------------------|--------------|-----------------------|----------------------|-------------------------|------------------------|-----------------------|-----------------------|------------------------|-----------------------|------------------------------------------------------------------------------------|
| tensin 3 | Y354<br>S332/<br>Y333/<br>S337/<br>T345 | WDs(25)y(25)ENMs(25)ADGEV LHT(25)QG PVDGSLy AK | tensin 3                                 | gi 134152676 | 0.72 +/- 0.1 (n = 4)  | 1.44 +/- 0.2 (n = 2) | 1.17 (n = 1)            | 1.01 +/- 0.16 (n = 5)  | n.d.                  | n.d.                  | n.d.                   | n.d.                  | 30, 29                                                                             |
| TARS     | Y297                                    | IyGISFPDP K                                    | threonyl-tRNA synthetase                 | gi 27229277  | 0.64 +/- 0.11 (n = 4) | 0.87 +/- 0.3 (n = 2) | 0.99 +/- 0.05 (n = 7)*  | 1.29 +/- 0.11 (n = 6)* | n.d.                  | n.d.                  | 0.91 +/- 0.06 (n = 4)  | 1.09 +/- 0.15 (n = 4) | 27, 23, 21, 31, 26                                                                 |
| ZO1      | Y1145                                   | TRyEQLP R                                      | tight junction protein 1                 | gi 6678355   | n.d.                  | n.d.                 | 1.07 +/- 0.02 (n = 4)   | 0.93 +/- 0.08 (n = 4)  | n.d.                  | n.d.                  | n.d.                   | n.d.                  | 19                                                                                 |
| ZO1      | Y1066                                   | YEVSSyT DQFSR                                  | tight junction protein 1                 | gi 6678355   | n.d.                  | n.d.                 | 0.9 +/- 0.05 (n = 4)    | 1.1 +/- 0.08 (n = 4)   | n.d.                  | n.d.                  | n.d.                   | n.d.                  | 25                                                                                 |
| ZO1      | Y1190                                   | QyFDQYP R                                      | tight junction protein 1                 | gi 6678355   | n.d.                  | n.d.                 | n.d.                    | n.d.                   | 0.96 +/- 0.04 (n = 4) | 1.08 +/- 0.05 (n = 2) | n.d.                   | 0.99 (n = 1)          | 21                                                                                 |
| ZO1      | Y1360                                   | QLSyFDR R                                      | tight junction protein 1                 | gi 6678355   | n.d.                  | n.d.                 | 0.99 +/- 0.08 (n = 4)   | 1.01 +/- 0.09 (n = 4)  | n.d.                  | n.d.                  | n.d.                   | n.d.                  | 31                                                                                 |
| ZO2      | Y486                                    | VFLRPSPE DEAIyGP NTK                           | tight junction protein 2                 | gi 7549795   | 1.16 +/- 0.13 (n = 2) | 1.18 (n = 1)         | 0.93 +/- 0.04 (n = 7)   | 1 +/- 0.03 (n = 6)     | n.d.                  | n.d.                  | n.d.                   | n.d.                  | 19, 20, 22                                                                         |
| TGM2     | Y369                                    | SEGTyCC GPVSVR                                 | transglutaminase 2, C polypeptide        | gi 6678329   | n.d.                  | n.d.                 | 0.7 +/- 0.07 (n = 7)    | 1.35 +/- 0.1 (n = 6)   | 0.6 +/- 0.11 (n = 4)  | 1.04 +/- 0.03 (n = 2) | 0.84 +/- 0.05 (n = 4)^ | 1.54 +/- 0.27 (n = 4) | 44, 44, 51, 42                                                                     |
| TTYH2    | Y494                                    | yENVPLIG R                                     | tweety 2                                 | gi 68989251  | n.d.                  | n.d.                 | 1.16 +/- 0.08 (n = 4)   | 0.84 +/- 0.16 (n = 4)  | n.d.                  | n.d.                  | n.d.                   | n.d.                  | 22                                                                                 |
| UGDH     | Y108                                    | yIEACAR                                        | UDP-glucose dehydrogenase                | gi 6678499   | n.d.                  | n.d.                 | 1 +/- 0.01 (n = 4)      | 1 +/- 0.04 (n = 4)     | n.d.                  | n.d.                  | n.d.                   | n.d.                  | 21                                                                                 |
| UOX      | Y230                                    | GEySPSV QK                                     | urate oxidase                            | gi 6678509   | n.d.                  | n.d.                 | 0.74 +/- 0.16 (n = 4)   | 1.26 +/- 0.5 (n = 4)   | n.d.                  | n.d.                  | n.d.                   | n.d.                  | 17                                                                                 |
| UOX      | Y288                                    | EEVLLPL DNPYgK/ MGLINKE EVLLPLD NPyGK          | urate oxidase                            | gi 6678509   | 0.7 +/- 0.07 (n = 6)  | 0.73 +/- 0.2 (n = 3) | 1.03 +/- 0.03 (n = 7)** | 1.4 +/- 0.13 (n = 6)*  | 0.94 +/- 0.07 (n = 7) | 1.04 +/- 0.13 (n = 4) | 0.91 +/- 0.06 (n = 8)  | 1.14 +/- 0.12 (n = 7) | 29, 34, 28, 18, 24, 26, 38, 23, 32, 47, 42, 31, 24, 31, 47, 35, 29, 33, 40, 23, 21 |
| Abl      | Y393                                    | LMTGDyT AHAGA K                                | v-abl Abelson murine leukemia oncogene 1 | gi 33859504  | n.d.                  | n.d.                 | 0.95 +/- 0.1 (n = 4)    | 1.05 +/- 0.13 (n = 4)  | n.d.                  | n.d.                  | n.d.                   | n.d.                  | 24                                                                                 |
| VCP      | Y173                                    | VVETDPS PyCIVAPD TVIHCEG EPIKR                 | valosin containing protein               | gi 30023842  | n.d.                  | n.d.                 | 0.71 +/- 0.03 (n = 4)   | 1.29 +/- 0.1 (n = 4)   | n.d.                  | n.d.                  | n.d.                   | n.d.                  | 40                                                                                 |
| Crk      | Y251                                    | VPNAyDK                                        | v-crk sarcoma                            | gi 31559995  | n.d.                  | n.d.                 | n.d.                    | n.d.                   | 1.05 +/-              | 0.89 +/-              | n.d.                   | 1.03 (n =             | 24                                                                                 |

|          |           |                                                                         |                                                                       |             |                             |                             |                               |                             |                             |                             |                             |                             |                                                                                   |
|----------|-----------|-------------------------------------------------------------------------|-----------------------------------------------------------------------|-------------|-----------------------------|-----------------------------|-------------------------------|-----------------------------|-----------------------------|-----------------------------|-----------------------------|-----------------------------|-----------------------------------------------------------------------------------|
|          |           | TALALEV<br>GELVK                                                        | virus CT10<br>oncogene<br>homolog                                     |             |                             |                             |                               |                             | 0.07 (n =<br>4)             | 0.02 (n =<br>2)             |                             | 1)                          |                                                                                   |
| CrkL     | Y198      | NSNSyGIP<br>EPAHAYA<br>QPQTTP<br>LPTVAST<br>PGAAINP<br>LPSTQNG<br>PVFAK | v-crck sarcoma<br>virus CT10<br>oncogene<br>homolog (avian)-<br>like  | gi 31542421 | 0.7 +/-<br>0.11 (n =<br>4)  | 0.89 +/-<br>0.02 (n =<br>3) | 1.12 +/-<br>0.22 (n =<br>4)   | 1.26 +/-<br>0.16 (n =<br>4) | n.d.                        | n.d.                        | n.d.                        | n.d.                        | 70, 83                                                                            |
| CrkL     | Y132      | TLyDFPG<br>NDAEDLP<br>FK                                                | v-crck sarcoma<br>virus CT10<br>oncogene<br>homolog (avian)-<br>like  | gi 31542421 | 0.93 +/-<br>0.08 (n =<br>6) | 1.08 +/-<br>0.04 (n =<br>3) | 1.13 (n =<br>1)               | 1.01 +/-<br>0.08 (n =<br>5) | 0.9 +/-<br>0.06 (n =<br>7)  | 1.08 +/-<br>0.06 (n =<br>4) | 1.03 +/-<br>0.07 (n =<br>4) | 1.06 +/-<br>0.07 (n =<br>4) | 32, 20, 36,<br>31, 35, 55,<br>32                                                  |
| HER3     | Y132<br>5 | SLEATDS<br>AFDNPdy<br>WHSR                                              | v-erb-b2<br>erythroblastic<br>leukemia viral<br>oncogene<br>homolog 3 | gi 61098019 | 0.92 +/-<br>0.31 (n =<br>2) | 0.86 (n =<br>1)             | 0.76 (n =<br>1)               | 1.18 +/-<br>0.15 (n =<br>3) | 1.1 +/-<br>0.06 (n =<br>4)  | 1.12 +/-<br>0.34 (n =<br>2) | 0.81 +/-<br>0.07 (n =<br>4) | 1.03 +/-<br>0.12 (n =<br>4) | 74, 21, 43                                                                        |
| vinculin | Y692      | NPGNQA<br>AyEHFET<br>MK                                                 | vinculin                                                              | gi 31543942 | n.d.                        | n.d.                        | 0.98 +/-<br>0.13 (n =<br>4)   | 1.02 +/-<br>0.14 (n =<br>4) | n.d.                        | n.d.                        | n.d.                        | n.d.                        | 21                                                                                |
| vinculin | Y822      | SFLDSGy<br>R                                                            | vinculin                                                              | gi 31543942 | 0.88 +/-<br>0.05 (n =<br>4) | 0.94 +/-<br>0.05 (n =<br>3) | 1.06 +/-<br>0.06 (n =<br>7)   | 1.03 +/-<br>0.05 (n =<br>6) | 1.16 +/-<br>0.07 (n =<br>3) | 0.9 +/-<br>0.08 (n =<br>4)  | n.d.                        | 0.93 (n =<br>1)             | 33, 30, 28,<br>21, 24                                                             |
| Yes      | Y220      | KLDNGG<br>YyITR/L<br>DNGGyYI<br>TTR                                     | viral oncogene<br>yes homolog                                         | gi 6678617  | n.d.                        | n.d.                        | 1.08 +/-<br>0.07 (n =<br>7)   | 0.91 +/-<br>0.07 (n =<br>6) | 1.08 +/-<br>0.11 (n =<br>4) | 1.16 +/-<br>0.07 (n =<br>2) | 0.89 +/-<br>0.05 (n =<br>4) | 0.95 +/-<br>0.07 (n =<br>4) | 33, 40, 18,<br>29, 29                                                             |
| Yes      | Y424      | LIEDNEyT<br>AR                                                          | viral oncogene<br>yes homolog                                         | gi 6678617  | 0.98 +/-<br>0.04 (n =<br>6) | 0.92 +/-<br>0.05 (n =<br>3) | 1.06 +/-<br>0.07 (n =<br>7)   | 0.98 +/-<br>0.09 (n =<br>6) | 0.98 +/-<br>0.22 (n =<br>7) | 1.07 +/-<br>0.19 (n =<br>4) | 0.86 +/-<br>0.03 (n =<br>8) | 1.14 +/-<br>0.15 (n =<br>7) | 52, 56, 52,<br>34, 49, 46,<br>60, 60, 58,<br>58, 56, 52,<br>61, 56, 56,<br>56, 57 |
| Yes      | Y192      | GAySLSIR                                                                | viral oncogene<br>yes homolog                                         | gi 6678617  | n.d.                        | n.d.                        | n.d.                          | n.d.                        | n.d.                        | n.d.                        | 1 +/- 0.04<br>(n = 4)       | 1 +/-<br>0.07 (n =<br>4)    | 21                                                                                |
| VDAC1    | Y195      | TDEFQLH<br>TNVNDGT<br>EFGGSlyQ<br>K                                     | voltage-<br>dependent anion<br>channel 1                              | gi 6755963  | n.d.                        | n.d.                        | n.d.                          | n.d.                        | 0.95 +/-<br>0.03 (n =<br>4) | 1.09 +/-<br>0.08 (n =<br>2) | n.d.                        | 1.01 (n =<br>1)             | 35                                                                                |
| WASP     | Y293      | LlyDFIED<br>QGGLEAV<br>R                                                | Wiskott-Aldrich<br>syndrome<br>homolog                                | gi 6678581  | n.d.                        | n.d.                        | n.d.                          | n.d.                        | 0.86 +/-<br>0.1 (n = 7)     | 0.9 +/-<br>0.07 (n =<br>4)  | 0.93 +/-<br>0.08 (n =<br>4) | 1.43 +/-<br>0.23 (n =<br>4) | 69, 25, 71                                                                        |
| N-WASP   | Y253      | VlyDFIEK                                                                | Wiskott-Aldrich<br>syndrome-like                                      | gi 58037309 | 0.6 +/-<br>0.05 (n =<br>4)  | 0.72 +/-<br>0.31 (n =<br>2) | 1.47 +/-<br>0.16 (n =<br>4)** | 1.05 +/-<br>0.11 (n =<br>6) | 1.27 +/-<br>0.09 (n =<br>4) | 0.63 +/-<br>0.48 (n =<br>2) | 0.98 +/-<br>0.08 (n =<br>4) | 0.93 +/-<br>0.3 (n =<br>4)  | 21, 18, 24,<br>18, 16                                                             |
| Lyn      | Y452      | MENCPE                                                                  | Yamaguchi                                                             | gi 33859588 | 0.52 +/-                    | 1.58 (n =                   | 0.9 (n = 1)                   | 1.16 +/-                    | n.d.                        | n.d.                        | n.d.                        | n.d.                        | 26                                                                                |

|          |           |                                   |                                                                                |             |                       |                         |                        |                          |                       |                         |                          |                       |                                        |
|----------|-----------|-----------------------------------|--------------------------------------------------------------------------------|-------------|-----------------------|-------------------------|------------------------|--------------------------|-----------------------|-------------------------|--------------------------|-----------------------|----------------------------------------|
|          |           | LyDIMK                            | sarcoma viral (v-yes-1) oncogene homolog                                       |             | 0.01 (n = 2)          | 1)                      |                        | 0.4 (n = 3)              |                       |                         |                          |                       |                                        |
| Lyn      | Y173      | SLDNGGYyISPR                      | Yamaguchi sarcoma viral (v-yes-1) oncogene homolog                             | gi 33859588 | n.d.                  | n.d.                    | 1.06 +/- 0.07 (n = 7)  | 0.93 +/- 0.07 (n = 6)    | 1.04 +/- 0.06 (n = 4) | 1.05 +/- 0.28 (n = 2)   | 1.02 +/- 0.03 (n = 4)    | 0.92 +/- 0.07 (n = 4) | 68, 56, 47, 52, 22                     |
| Lyn      | Y376      | VIEDNEyTAR                        | Yamaguchi sarcoma viral (v-yes-1) oncogene homolog                             | gi 33859588 | 0.95 +/- 0.1 (n = 5)  | 1.35 +/- 0.32 (n = 3)   | 0.88 +/- 0.08 (n = 4)  | 0.93 +/- 0.11 (n = 5)    | 1.15 +/- 0.19 (n = 7) | 1.07 +/- 0.11 (n = 4)   | 0.76 +/- 0.12 (n = 8)    | 1.09 +/- 0.18 (n = 7) | 59, 56, 42, 29, 30, 50, 62, 69, 52, 42 |
| ZAP      | Y508      | EAVySGVQSLR                       | zinc finger CCCH type, antiviral 1                                             | gi 21746169 | n.d.                  | n.d.                    | n.d.                   | n.d.                     | n.d.                  | n.d.                    | 0.72 +/- 0.06 (n = 4)    | 1.28 +/- 0.13 (n = 4) | 41                                     |
| ZDHHC8   | S534 Y538 | EPsPVRyDNLSR                      | zinc finger, DHHC domain containing 8                                          | gi 84619699 | 0.93 +/- 0.11 (n = 2) | 0.89 (n = 1)            | 1.12 (n = 1)           | 1.05 +/- 0.08 (n = 3)    | n.d.                  | n.d.                    | n.d.                     | n.d.                  | 20                                     |
| HPD      | Y232      | SIVVTNyEESIK                      | 4-hydroxyphenylpyruvic acid dioxygenase                                        | gi 33859486 | 0.84 +/- 0.08 (n = 5) | 1.04 +/- 0.04 (n = 3)   | 0.98 +/- 0.02 (n = 7)  | 1.13 +/- 0.05 (n = 6)^   | n.d.                  | n.d.                    | n.d.                     | n.d.                  | 24, 64, 22, 49, 49                     |
| HPD      | Y221      | FWSVDDTQVHTEySSLR                 | 4-hydroxyphenylpyruvic acid dioxygenase                                        | gi 33859486 | 0.66 +/- 0.09 (n = 6) | 1.39 +/- 0.02 (n = 3)** | 0.73 +/- 0.04 (n = 7)  | 1.46 +/- 0.13 (n = 6)*** | 0.62 +/- 0.07 (n = 7) | 1.09 +/- 0.12 (n = 4)** | 1.12 +/- 0.08 (n = 4)**  | 1.45 +/- 0.17 (n = 4) | 58, 26, 42, 45, 64, 43, 32, 53, 48     |
| NIPSNAP1 | Y261      | RGWDEN VyYTVPL VR/GWDE NVyYTVPLVR | 4-nitrophenylphosphatase domain and non-neuronal SNAP25-like protein homolog 1 | gi 6679066  | 0.41 +/- 0.05 (n = 4) | 0.67 +/- 0.16 (n = 2)   | 1.08 +/- 0.1 (n = 7)** | 1.41 +/- 0.22 (n = 6)    | 0.38 +/- 0.05 (n = 7) | 0.53 +/- 0.16 (n = 4)   | 1.46 +/- 0.19 (n = 8)*** | 1.36 +/- 0.15 (n = 7) | 39, 63, 27, 41, 37, 49, 45, 41         |

Phosphotyrosine measurements are written as mean +/- standard error for each of the diet and genotype conditions. The number of mice analyzed per condition is denoted in parentheses. For each dataset (basal or insulin-stimulated) statistical analysis was performed using one-way ANOVA with sequential Sidak-Dunn method to adjust for multiple comparisons (1) L-PTP1b<sup>-/-</sup> mice to control on NC diet, (2) L-PTP1b<sup>-/-</sup> mice to control on HFD, and (3) HFD control to NC control. \*\*\* = P<.001, \*\* = P<.01, \* = P < .05, ^ = P<.1.

**Table S3: Sets tested in phosphosite-set enrichment analysis**

| Set             | Size | Phosphosites                                                                                                                                                                              | Source |
|-----------------|------|-------------------------------------------------------------------------------------------------------------------------------------------------------------------------------------------|--------|
| Golgi apparatus | 17   | Lyn Y173, ZO1 Y1145, DYRK4 Y344, CAV1 Y14 Y6, ZO1 Y1360, Lyn Y376, ZO1 Y1190, HSPD1 Y243, PEBP1 Y181, ZO1 Y1066, FASN Y1248, HPD Y232, HSPD1 Y385, GLUL Y336, CAT Y231, CAT Y84, HPD Y221 | GO     |
| Lysosome        | 8    | GOT1 Y264, ALDOB Y204, ASS1 Y29, GOT1 Y71, ASS1 Y133, ASS1 Y322, CAT Y231,                                                                                                                | GO     |



|                       |     |                                                                                                                                                                                                                                                                                                                                                                                                                                                                                                                                                                                                                                                                                                                                                                                                                                                                                                                                                                                                                                                                                                                                                                                                                                                                                                                                            |    |
|-----------------------|-----|--------------------------------------------------------------------------------------------------------------------------------------------------------------------------------------------------------------------------------------------------------------------------------------------------------------------------------------------------------------------------------------------------------------------------------------------------------------------------------------------------------------------------------------------------------------------------------------------------------------------------------------------------------------------------------------------------------------------------------------------------------------------------------------------------------------------------------------------------------------------------------------------------------------------------------------------------------------------------------------------------------------------------------------------------------------------------------------------------------------------------------------------------------------------------------------------------------------------------------------------------------------------------------------------------------------------------------------------|----|
|                       |     | CAT Y84                                                                                                                                                                                                                                                                                                                                                                                                                                                                                                                                                                                                                                                                                                                                                                                                                                                                                                                                                                                                                                                                                                                                                                                                                                                                                                                                    |    |
| Mitochondria          | 35  | Lyn Y173, PC Y118, HADHA Y724, FH Y488, CPS1 Y140, HSPE1 Y76, SLC25A5 Y191, SLC25A5 Y81, ACAT1 Y328, FH Y462, GLUD1 Y135, CPS1 Y1450, GLUD1 Y512, ACAA2 Y198, ACSM3 Y51, Lyn Y376, OTC Y317, NIPSNAP1 Y148, GOT2 Y96, NIPSNAP1 Y261, CPS1 Y590, VDAC1 Y195, HSPD1 Y243, PEBP1 Y181, ASS1 Y29, PHB Y249, ASS1 Y133, ASS1 Y322, GOT2 Y284, CPS1 Y162, HSPD1 Y385, CAT Y231, CAT Y84, ACSL5 Y69, CYB5A Y11                                                                                                                                                                                                                                                                                                                                                                                                                                                                                                                                                                                                                                                                                                                                                                                                                                                                                                                                    | GO |
| Endoplasmic Reticulum | 18  | CAV1 Y14 Y6, ALDOB Y204, HSPD1 Y243, PEBP1 Y181, ASS1 Y29, ASS1 Y133, HPD Y232, ASS1 Y322, HSPD1 Y385, GLUL Y336, CAT Y231, CAT Y84, VCP Y173, ACSL5 Y69, CYP2E1 Y426, CALM1 Y100, HPD Y221, CYB5A Y11                                                                                                                                                                                                                                                                                                                                                                                                                                                                                                                                                                                                                                                                                                                                                                                                                                                                                                                                                                                                                                                                                                                                     | GO |
| Endosome              | 15  | EGFR Y1172, Crk Y251, ATP1A1 Y260, CAV1 Y14 Y6, EGFR Y1197, EGFR Y1092, InsR Y1175 Y1179, CDK2 Y15, ARHGAP27 Y28, Hrs Y216, InsR Y1179/Y1175, HSPD1 Y243, ANXA2 Y24, HSPD1 Y385, Shc1 Y313                                                                                                                                                                                                                                                                                                                                                                                                                                                                                                                                                                                                                                                                                                                                                                                                                                                                                                                                                                                                                                                                                                                                                 | GO |
| Cytosol               | 108 | Lyn Y173, Dok1 Y450, BCAR1 Y238, FBP1 Y216, Yes Y220, Fgr Y197, RPL13A Y137, p38-alpha Y182, Crk Y251, afadin Y1285, PIK3R1 Y197, Dok1 Y408, BCAR1 Y291, SHP-2 Y62, BCAR1 Y556, FAK Y577 T575, Dok1 Y361, vinculin Y822, BCAR1 Y271, SEC14L4 Y36, FBP1 Y265, PLCG1 Y771, CAV1 Y14 Y6, eEF1A1 Y177, IRS2 Y649, GRF-1 Y1087, STAT3 Y686, BCAR1 Y414, DLG1 Y783, Yes Y192, FAK Y861, InsR Y1175 Y1179, BCAR1 Y391, GOT1 Y264, vinculin Y692, UGDH Y108, CDK2 Y15, Abl Y393, GSK3B Y216 S219, afadin Y1230, CTNND1 Y904, talin 1 Y1116, BCAR1 Y253, Yes Y424, CTNNB1 Y654, PGAM2 Y92, CrkL Y198, PGK1 Y196, ALDOB Y204, LHPP Y159, SCAP2 Y260, FAK Y397, FAK Y576, WASP Y293, talin 1 Y26, CrkL Y132, p38-alpha Y182 T180, Hrs Y216, Lyn Y376, OTC Y317, JAK2 Y570, CAR2 Y114, ERK2 Y185 T188/T183, ERK1 Y205 T203/T208, SEC14L4 Y36, GSK3B Y216, FBP1 Y245, InsR Y1179/Y1175, plectin 1 Y288, IRS2 Y814, HSPD1 Y243, SHMT1 Y67, IDH1 Y391, CTNND1 Y96, TARS Y297, GRF-1 Y1105, IRS1 Y983, IRS1 Y460, IRS1 Y935, ERK2 Y185, PIK3R1 Y310, GPX1 Y147, GOT1 Y71, HSP90A Y285, IRS2 Y671, SHMT1 Y28, FASN Y1248, HPD Y232, Nck1 Y105, ERK1 Y205, ACLY Y672, HSPD1 Y385, PGM1 Y353, GNMT Y22, CAT Y231, CAT Y84, LDHA Y239, Shc1 Y313, VCP Y173, PRDX6 Y89, GNMT Y34, SHP-2 Y584, PTPNA Y141, GNMT Y221, TGM2 Y369, CALM1 Y100, HPD Y221, SAHH Y193 | GO |
| Peroxisome            | 10  | UOX Y230, SCP2 Y197, ISOC1 Y159, ACOX1 Y629, IDH1 Y391, ACAD11 Y323, UOX Y288, CAT Y231, CAT Y84, PRDX6 Y89                                                                                                                                                                                                                                                                                                                                                                                                                                                                                                                                                                                                                                                                                                                                                                                                                                                                                                                                                                                                                                                                                                                                                                                                                                | GO |

|                                                      |    |                                                                                                                                                                                                                                                                                                                                                                                                                                                                                                                                            |               |
|------------------------------------------------------|----|--------------------------------------------------------------------------------------------------------------------------------------------------------------------------------------------------------------------------------------------------------------------------------------------------------------------------------------------------------------------------------------------------------------------------------------------------------------------------------------------------------------------------------------------|---------------|
| Plasma Membrane                                      | 36 | CLDN2 Y194/Y195, TTYH2 Y494, EGFR Y1172, CLDN3 Y197, EphA2 Y589, FAK Y577 T575, PECAM-1 Y702, CEACAM1 Y515, CAV1 Y14 Y6, EGFR Y1197, SLC22A1 Y545, HLAC Y344, EphB4 Y774, EGFR Y1092, FAK Y861, InsR Y1175 Y1179, HER3 Y1325, EphA2 Y773, H2-K1 Y342, FAK Y397, FAK Y576, OTC Y317, Sept2 Y17, ERK2 Y185 T188/T183, GOT2 Y96, InsR Y1179/Y1175, plectin 1 Y288, HSPD1 Y243, PEBP1 Y181, PHB Y249, ERK2 Y185, HSP90A Y285, GOT2 Y284, HSPD1 Y385, PIPNA Y141, CALM1 Y100                                                                    | GO            |
| Cytoskeleton related                                 | 42 | PARD3 Y1076, CTNNA1 Y177, PARD3 Y1123, p38-alpha Y182, CLTC Y899, SHP-2 Y62, FAK Y577 T575, N-WASP Y253, vinculin Y822, KIF13B Y1722, CTNNA1 Y619, GRF-1 Y1087, DLG1 Y783, FAK Y861, vinculin Y692, CGN Y229, talin 2 Y1665, Abl Y393, talin 1 Y1116, CTNNB1 Y654, PXN Y118, Pyk2 Y579, FAK Y397, FAK Y576, WASP Y293, talin 1 Y26, Pyk2 Y579 Y580, p38-alpha Y182 T180, JAK2 Y570, CLTC Y1477, Sept2 Y17, CLTC Y1487, plectin 1 Y288, Pyk2 Y807, SHIP-2 Y1136, GRF-1 Y1105, ANXA2 Y24, K8 Y210, K85 Y236, SHP-2 Y584, K18 Y14, CALM1 Y100 | GO            |
| Membrane organization and vesicle-mediated transport | 9  | CLTC Y899, CAV1 Y14 Y6, DLG1 Y783, CTNNB1 Y654, ITSN2 Y922, ARHGAP27 Y28, WASP Y293, CLTC Y1477, CLTC Y1487                                                                                                                                                                                                                                                                                                                                                                                                                                | GO            |
| Cell death                                           | 13 | Shb Y432, EphA2 Y589, Shb Y342, HIPK3 Y359, SHF Y64, CTNNB1 Y654, EphA2 Y773, JAK2 Y570, VDAC1 Y195, GPX1 Y147, K8 Y210, VCP Y173, K18 Y14                                                                                                                                                                                                                                                                                                                                                                                                 | GO, SwissProt |
| Ion transport                                        | 6  | TTYH2 Y494, ATP1A1 Y260, CAV1 Y14 Y6, SLC22A1 Y545, CDK2 Y15, VDAC1 Y195                                                                                                                                                                                                                                                                                                                                                                                                                                                                   | GO, SwissProt |
| PDZ                                                  | 13 | PARD3 Y1076, PARD3 Y1123, ZO1 Y1145, DLG3 Y705, afadin Y1285, Erbin Y1097, MAGI1 Y361, DLG1 Y783, ZO1 Y1360, afadin Y1230, ZO2 Y486, ZO1 Y1190, ZO1 Y1066                                                                                                                                                                                                                                                                                                                                                                                  | PFAM          |
| S/T kinase                                           | 15 | p38-alpha Y182, PRP4 Y849, DYRK4 Y344, HIPK3 Y359, CDK2 Y15, GSK3B Y216 S219, HIPK1 Y352, CKDL5 Y171, p38-alpha Y182 T180, DYRK1B Y273, ERK2 Y185 T188/T183, ERK1 Y205 T203/T208, GSK3B Y216, ERK2 Y185, ERK1 Y205                                                                                                                                                                                                                                                                                                                         | PFAM          |
| Y kinase                                             | 29 | Lyn Y173, AXL Y697, TEC Y415, EGFR Y1172, Yes Y220, Fgr Y197, EphA2 Y589, FAK Y577 T575, EGFR Y1197, EphB4 Y774, EGFR Y1092, Yes Y192, FAK Y861, InsR Y1175 Y1179, Abl Y393, Yes Y424, HER3 Y1325, Met Y1001, EphA2 Y773, Pyk2 Y579, FAK Y397, FAK Y576, Pyk2 Y579 Y580, Lyn Y376, Fer Y715, JAK2 Y570, InsR Y1179/Y1175, Fer Y402, Pyk2 Y807                                                                                                                                                                                              | PFAM          |
| SH3                                                  | 26 | Lyn Y173, BCAR1 Y238, TEC Y415, Yes Y220, Fgr Y197, Crk Y251, DLG3 Y705, BCAR1                                                                                                                                                                                                                                                                                                                                                                                                                                                             | PFAM          |

|                                      |    |                                                                                                                                                                                                                                                                                                                                                                                                                                                                                             |          |
|--------------------------------------|----|---------------------------------------------------------------------------------------------------------------------------------------------------------------------------------------------------------------------------------------------------------------------------------------------------------------------------------------------------------------------------------------------------------------------------------------------------------------------------------------------|----------|
|                                      |    | Y291, BCAR1 Y556, BCAR1 Y271, PLCG1 Y771, BCAR1 Y414, DLG1 Y783, Yes Y192, BCAR1 Y391, Abl Y393, BCAR1 Y253, Yes Y424, ITSN2 Y922, CrkL Y198, SCAP2 Y260, CrkL Y132, Lyn Y376, ARHGAP42 Y371, ARHGAP42 Y342, Nck1 Y105                                                                                                                                                                                                                                                                      |          |
| Variant SH3                          | 10 | ZO1 Y1145, Crk Y251, CASKIN2 Y253, ZO1 Y1360, ITSN2 Y922, CrkL Y198, ZO2 Y486, CrkL Y132, ZO1 Y1190, ZO1 Y1066                                                                                                                                                                                                                                                                                                                                                                              | PFAM     |
| SH2                                  | 35 | Lyn Y173, SHEP1 Y178, TEC Y415, Yes Y220, Fgr Y197, Crk Y251, tensin 1 Y1558, Shb Y432, PIK3R1 Y197, Shb Y342, SHP-2 Y62, tensin 1 Y1480, TENC1 Y705, PLCG1 Y771, tensin 1 Y1593, STAT3 Y686, Yes Y192, Abl Y393, SHF Y64, Yes Y424, tensin 1 Y537, CrkL Y198, CrkL Y132, BCAR3 Y424, Lyn Y376, Fer Y715, Fer Y402, TENC1 Y770, SHIP-2 Y1136, TENC1 Y483, PIK3R1 Y310, tensin 3 Y354 S332/Y333/S337/T345, Nck1 Y105, Shc1 Y313, SHP-2 Y584                                                  | PFAM     |
| SAM                                  | 6  | EphA2 Y589, EphB4 Y774, CASKIN2 Y253, EphA2 Y773, ANKS1A Y472, SHIP-2 Y1136                                                                                                                                                                                                                                                                                                                                                                                                                 | PFAM     |
| PH                                   | 16 | Dok1 Y450, Dok1 Y408, Dok1 Y361, PLCG1 Y771, PLEKHG1 Y1051, IRS2 Y649, GAB2 Y290, ITSN2 Y922, ARHGAP27 Y28, SCAP2 Y260, IRS2 Y814, AFAP1L2 Y357, IRS1 Y983, IRS1 Y460, IRS1 Y935, IRS2 Y671                                                                                                                                                                                                                                                                                                 | PFAM     |
| FERM domain                          | 11 | FAK Y577 T575, FAK Y861, talin 2 Y1665, talin 1 Y1116, Pyk2 Y579, FAK Y397, FAK Y576, talin 1 Y26, Pyk2 Y579 Y580, JAK2 Y570, Pyk2 Y807                                                                                                                                                                                                                                                                                                                                                     | Interpro |
| Adherens junction                    | 32 | PARD3 Y1076, CTNNA1 Y177, PARD3 Y1123, EGFR Y1172, Yes Y220, ZO1 Y1145, afadin Y1285, N-WASP Y253, vinculin Y822, CTNNA1 Y619, EGFR Y1197, EGFR Y1092, Yes Y192, InsR Y1175 Y1179, ZO1 Y1360, vinculin Y692, afadin Y1230, CTNND1 Y904, Yes Y424, CTNNB1 Y654, Met Y1001, WASP Y293, Fer Y715, ERK2 Y185 T188/T183, ZO1 Y1190, ERK1 Y205 T203/T208, InsR Y1179/Y1175, ZO1 Y1066, Fer Y402, CTNND1 Y96, ERK2 Y185, ERK1 Y205                                                                 | KEGG     |
| Leukocyte transendothelial migration | 37 | CLDN2 Y194/Y195, BCAR1 Y238, CTNNA1 Y177, F11R Y281, p38-alpha Y182, CLDN3 Y197, afadin Y1285, PIK3R1 Y197, BCAR1 Y291, SHP-2 Y62, BCAR1 Y556, FAK Y577 T575, PECAM-1 Y702, vinculin Y822, BCAR1 Y271, PLCG1 Y771, CTNNA1 Y619, GRF-1 Y1087, BCAR1 Y414, FAK Y861, BCAR1 Y391, vinculin Y692, afadin Y1230, CTNND1 Y904, BCAR1 Y253, CTNNB1 Y654, PXN Y118, Pyk2 Y579, FAK Y397, FAK Y576, Pyk2 Y579 Y580, p38-alpha Y182 T180, Pyk2 Y807, CTNND1 Y96, GRF-1 Y1105, PIK3R1 Y310, SHP-2 Y584 | KEGG     |
| ErbB signaling pathway               | 23 | EGFR Y1172, Crk Y251, PIK3R1 Y197, FAK Y577 T575, PLCG1 Y771, EGFR Y1197, EGFR Y1092, FAK Y861, Abl Y393, GSK3B Y216 S219, HER3 Y1325, CrkL Y198, FAK Y397, FAK Y576, CrkL Y132, ERK2 Y185 T188/T183, ERK1 Y205 T203/T208, GSK3B                                                                                                                                                                                                                                                            | KEGG     |

|                                  |    |                                                                                                                                                                                                                                                                                                                                                                                                                                                                                         |      |
|----------------------------------|----|-----------------------------------------------------------------------------------------------------------------------------------------------------------------------------------------------------------------------------------------------------------------------------------------------------------------------------------------------------------------------------------------------------------------------------------------------------------------------------------------|------|
|                                  |    | Y216, ERK2 Y185, PIK3R1 Y310, Nck1 Y105, ERK1 Y205, Shc1 Y313                                                                                                                                                                                                                                                                                                                                                                                                                           |      |
| Chemokine signaling pathway      | 36 | Lyn Y173, PARD3 Y1076, BCAR1 Y238, PARD3 Y1123, Fgr Y197, Crk Y251, PIK3R1 Y197, BCAR1 Y291, BCAR1 Y556, FAK Y577 T575, N-WASP Y253, BCAR1 Y271, STAT3 Y686, BCAR1 Y414, FAK Y861, BCAR1 Y391, GSK3B Y216 S219, BCAR1 Y253, CrkL Y198, PXN Y118, Pyk2 Y579, FAK Y397, FAK Y576, WASP Y293, Pyk2 Y579 Y580, CrkL Y132, Lyn Y376, JAK2 Y570, ERK2 Y185 T188/T183, ERK1 Y205 T203/T208, GSK3B Y216, Pyk2 Y807, ERK2 Y185, PIK3R1 Y310, ERK1 Y205, Shc1 Y313                                | KEGG |
| Focal adhesion                   | 37 | BCAR1 Y238, EGFR Y1172, Crk Y251, PIK3R1 Y197, BCAR1 Y291, BCAR1 Y556, FAK Y577 T575, vinculin Y822, BCAR1 Y271, CAV1 Y14 Y6, EGFR Y1197, GRF-1 Y1087, BCAR1 Y414, EGFR Y1092, FAK Y861, BCAR1 Y391, vinculin Y692, talin 2 Y1665, GSK3B Y216 S219, talin 1 Y1116, BCAR1 Y253, CTNNA1 Y654, CrkL Y198, Met Y1001, PXN Y118, FAK Y397, FAK Y576, talin 1 Y26, CrkL Y132, ERK2 Y185 T188/T183, ERK1 Y205 T203/T208, GSK3B Y216, GRF-1 Y1105, ERK2 Y185, PIK3R1 Y310, ERK1 Y205, Shc1 Y313 | KEGG |
| Neurotrophin signaling pathway   | 25 | p38-alpha Y182, Crk Y251, PIK3R1 Y197, SHP-2 Y62, PLCG1 Y771, IRS2 Y649, Abl Y393, GSK3B Y216 S219, CrkL Y198, CrkL Y132, p38-alpha Y182 T180, ERK2 Y185 T188/T183, ERK1 Y205 T203/T208, GSK3B Y216, IRS2 Y814, IRS1 Y983, IRS1 Y460, IRS1 Y935, ERK2 Y185, PIK3R1 Y310, IRS2 Y671, ERK1 Y205, Shc1 Y313, SHP-2 Y584, CALM1 Y100                                                                                                                                                        | KEGG |
| Arginine and proline metabolism  | 19 | CPS1 Y140, GOT1 Y264, ARG1 Y218, GLUD1 Y135, CPS1 Y1450, GLUD1 Y512, ARG1 Y197, OTC Y317, GOT2 Y96, CPS1 Y590, ASS1 Y29, GOT1 Y71, ASS1 Y133, ASS1 Y322, GOT2 Y284, ARG1 Y188, CPS1 Y162, GLUL Y336, ARG1 Y265                                                                                                                                                                                                                                                                          | KEGG |
| Glycolysis / Gluconeogenesis     | 12 | FBP1 Y216, FBP1 Y265, GAPDH Y328, PGAM2 Y92, PGK1 Y196, ALDOB Y204, FBP1 Y245, GAPDH Y316, PGM1 Y353, LDHA Y239, ENO1 Y44, ENO1 Y25                                                                                                                                                                                                                                                                                                                                                     | KEGG |
| Insulin signaling pathway        | 25 | FBP1 Y216, Crk Y251, PIK3R1 Y197, FBP1 Y265, IRS2 Y649, InsR Y1175 Y1179, GSK3B Y216 S219, CrkL Y198, CrkL Y132, ERK2 Y185 T188/T183, ERK1 Y205 T203/T208, GSK3B Y216, FBP1 Y245, InsR Y1179/Y1175, IRS2 Y814, IRS1 Y983, IRS1 Y460, IRS1 Y935, ERK2 Y185, PIK3R1 Y310, IRS2 Y671, FASN Y1248, ERK1 Y205, Shc1 Y313, CALM1 Y100                                                                                                                                                         | KEGG |
| Fc gamma R-mediated phagocytosis | 15 | Lyn Y173, Crk Y251, PIK3R1 Y197, N-WASP Y253, PLCG1 Y771, GAB2 Y290, CrkL Y198, WASP Y293, CrkL Y132, Lyn Y376, ERK2 Y185 T188/T183, ERK1 Y205 T203/T208, ERK2 Y185, PIK3R1 Y310, ERK1 Y205                                                                                                                                                                                                                                                                                             | KEGG |
| Tight junction                   | 20 | PARD3 Y1076, CLDN2 Y194/Y195, CTNNA1 Y177, PARD3 Y1123, Yes Y220, F11R                                                                                                                                                                                                                                                                                                                                                                                                                  | KEGG |

|                                             |    |                                                                                                                                                                                                                                                                                                                                   |                             |
|---------------------------------------------|----|-----------------------------------------------------------------------------------------------------------------------------------------------------------------------------------------------------------------------------------------------------------------------------------------------------------------------------------|-----------------------------|
|                                             |    | Y281, ZO1 Y1145, CLDN3 Y197, afadin Y1285, CTNNA1 Y619, MAGI1 Y361, Yes Y192, ZO1 Y1360, CGN Y229, afadin Y1230, Yes Y424, CTNNB1 Y654, ZO2 Y486, ZO1 Y1190, ZO1 Y1066                                                                                                                                                            |                             |
| Alanine, aspartate and glutamate metabolism | 14 | CPS1 Y140, GOT1 Y264, GLUD1 Y135, CPS1 Y1450, GLUD1 Y512, GOT2 Y96, CPS1 Y590, ASS1 Y29, GOT1 Y71, ASS1 Y133, ASS1 Y322, GOT2 Y284, CPS1 Y162, GLUL Y336                                                                                                                                                                          | KEGG                        |
| Nitrogen metabolism                         | 11 | CPS1 Y140, GLUD1 Y135, CPS1 Y1450, GLUD1 Y512, CTH Y59, CAR2 Y114, CPS1 Y590, CAR3 Y74, CPS1 Y162, GLUL Y336, CTH Y113                                                                                                                                                                                                            | KEGG                        |
| Signal transduction                         | 20 | Lyn Y173, SHEP1 Y178, EGFR Y1172, Crk Y251, Shb Y432, Shb Y342, CEACAM1 Y515, PLCG1 Y771, EGFR Y1197, EGFR Y1092, HER3 Y1325, Met Y1001, Lyn Y376, Fer Y715, JAK2 Y570, ERK2 Y185 T188/T183, ERK1 Y205 T203/T208, Fer Y402, ERK2 Y185, ERK1 Y205                                                                                  | GO                          |
| Metabolic process                           | 29 | HADHA Y724, CPS1 Y140, ACAT1 Y328, PCBD1 Y70, ARG1 Y218, GAPDH Y328, GLUD1 Y135, CPS1 Y1450, GLUD1 Y512, PGAM2 Y92, ARG1 Y197, CTH Y59, CAR2 Y114, CPS1 Y590, IDH1 Y391, GPX1 Y147, GAPDH Y316, PAH Y166, ARG1 Y188, CPS1 Y162, PGM1 Y353, CTH Y113, LDHA Y239, PRDX6 Y89, ARG1 Y265, TGM2 Y369, CYP2E1 Y426, ENO1 Y44, CYB5A Y11 | GO                          |
| Lipid localization                          | 6  | CAV1 Y14 Y6, ATP11C Y126, SCP2 Y197, GOT2 Y96, vigilin Y437, GOT2 Y284                                                                                                                                                                                                                                                            | GO                          |
| Lipid transport                             | 6  | ATP11C Y126, SCP2 Y197, GOT2 Y96, vigilin Y437, GOT2 Y284, ACBP Y29                                                                                                                                                                                                                                                               | GO, SwissProt, literature   |
| Glycerolipid metabolic process              | 8  | PIK3R1 Y197, SHP-2 Y62, CAV1 Y14 Y6, PIK3R1 Y310, GPX1 Y147, CAT Y231, CAT Y84, SHP-2 Y584                                                                                                                                                                                                                                        | GO                          |
| Lipid metabolism                            | 11 | HADHA Y724, ACAT1 Y328, ACAA2 Y198, ACSM3 Y51, ACOX1 Y629, vigilin Y437, ACLY Y672, PRDX6 Y89, ACSL5 Y69, ACBP Y29, CYB5A Y11                                                                                                                                                                                                     | KEGG, SwissProt, Literature |
| Fatty acid metabolism                       | 9  | HADHA Y724, ACAT1 Y328, ACAA2 Y198, ACOX1 Y629, ACLY Y672, PRDX6 Y89, ACSL5 Y69, ACBP Y29, CYB5A Y11                                                                                                                                                                                                                              | KEGG, Literature            |
| Glycine, serine, threonine                  | 8  | BHMT Y289, CTH Y59, SHMT1 Y67, SHMT1 Y28, GNMT Y22, CTH Y113, GNMT Y34, GNMT Y221                                                                                                                                                                                                                                                 | KEGG                        |

|                                    |    |                                                                                                                                                                                                                                                                                                                                                               |                           |
|------------------------------------|----|---------------------------------------------------------------------------------------------------------------------------------------------------------------------------------------------------------------------------------------------------------------------------------------------------------------------------------------------------------------|---------------------------|
| metabolism                         |    |                                                                                                                                                                                                                                                                                                                                                               |                           |
| Cysteine and methionine metabolism | 9  | GOT1 Y264, BHMT Y289, CTH Y59, GOT2 Y96, GOT1 Y71, GOT2 Y284, CTH Y113, LDHA Y239, SAHH Y193                                                                                                                                                                                                                                                                  | KEGG                      |
| Phenylalanine metabolism           | 8  | GOT1 Y264, GOT2 Y96, GOT1 Y71, HPD Y232, GOT2 Y284, PAH Y166, PRDX6 Y89, HPD Y221                                                                                                                                                                                                                                                                             | KEGG                      |
| Tryptophan metabolism              | 5  | HADHA Y724, ACAT1 Y328, INMT Y87, CAT Y231, CAT Y84                                                                                                                                                                                                                                                                                                           | KEGG                      |
| Pathways in cancer                 | 28 | FH Y488, CTNNA1 Y177, EGFR Y1172, Crk Y251, PIK3R1 Y197, FAK Y577 T575, PLCG1 Y771, CTNNA1 Y619, EGFR Y1197, STAT3 Y686, EGFR Y1092, FAK Y861, CDK2 Y15, Abl Y393, GSK3B Y216 S219, CTNNB1 Y654, CrkL Y198, Met Y1001, FAK Y397, FAK Y576, CrkL Y132, ERK2 Y185 T188/T183, ERK1 Y205 T203/T208, GSK3B Y216, ERK2 Y185, PIK3R1 Y310, HSP90A Y285, ERK1 Y205    | KEGG                      |
| Fc epsilon RI signaling pathway    | 12 | Lyn Y173, p38-alpha Y182, PIK3R1 Y197, PLCG1 Y771, GAB2 Y290, p38-alpha Y182 T180, Lyn Y376, ERK2 Y185 T188/T183, ERK1 Y205 T203/T208, ERK2 Y185, PIK3R1 Y310, ERK1 Y205                                                                                                                                                                                      | KEGG                      |
| Regulation of actin cytoskeleton   | 28 | BCAR1 Y238, EGFR Y1172, Crk Y251, PIK3R1 Y197, BCAR1 Y291, BCAR1 Y556, FAK Y577 T575, N-WASP Y253, vinculin Y822, BCAR1 Y271, EGFR Y1197, BCAR1 Y414, EGFR Y1092, FAK Y861, BCAR1 Y391, vinculin Y692, BCAR1 Y253, CrkL Y198, PXN Y118, FAK Y397, FAK Y576, WASP Y293, CrkL Y132, ERK2 Y185 T188/T183, ERK1 Y205 T203/T208, ERK2 Y185, PIK3R1 Y310, ERK1 Y205 | KEGG                      |
| Tyrosine metabolism                | 7  | GOT1 Y264, HGD Y40, GOT2 Y96, GOT1 Y71, HPD Y232, GOT2 Y284, HPD Y221                                                                                                                                                                                                                                                                                         | KEGG                      |
| Oxidation reduction                | 29 | HADHA Y724, UGDH Y108, GAPDH Y328, GLUD1 Y135, GLUD1 Y512, UOX Y230, HGD Y40, ACOX1 Y629, ALDH1L1 Y848, VDAC1 Y195, IDH1 Y391, ACAD11 Y323, UOX Y288, GPX1 Y147, GAPDH Y316, FASN Y1248, HPD Y232, PAH Y166, ALDH6A1 Y268, ALDH1L1 Y892, CAT Y231, CAT Y84, LDHA Y239, PRDX6 Y89, CYP2E1 Y426, HPD Y221, SAHH Y193, ALDH1A7 Y484, CYB5A Y11                   | GO, SwissProt, Literature |
| GTPase-related                     | 11 | SHEP1 Y178, N-WASP Y253, PLEKHG1 Y1051, GRF-1 Y1087, ITS2N2 Y922, ARHGAP27 Y28, WASP Y293, BCAR3 Y424, ARHGAP42 Y371, ARHGAP42 Y342, GRF-1 Y1105                                                                                                                                                                                                              | GO, PFAM                  |
| Protein biosynthesis               | 5  | RPL13A Y137, eEF1A1 Y141, eEF1A1 Y177, EIF1B Y30, TARS Y297                                                                                                                                                                                                                                                                                                   | GO, SwissProt             |
| Cytoskeletal                       | 21 | BCAR1 Y238, BCAR1 Y291, BCAR1 Y556, FAK Y577 T575, N-WASP Y253, BCAR1                                                                                                                                                                                                                                                                                         | GO                        |

|                                     |    |                                                                                                                                                                                                                                                                                                                                                                                                                                                                                                |                   |
|-------------------------------------|----|------------------------------------------------------------------------------------------------------------------------------------------------------------------------------------------------------------------------------------------------------------------------------------------------------------------------------------------------------------------------------------------------------------------------------------------------------------------------------------------------|-------------------|
| organization                        |    | Y271, BCAR1 Y414, DLG1 Y783, FAK Y861, BCAR1 Y391, talin 2 Y1665, Abl Y393, talin 1 Y1116, BCAR1 Y253, PXN Y118, FAK Y397, FAK Y576, WASP Y293, talin 1 Y26, Nck1 Y105, Shc1 Y313                                                                                                                                                                                                                                                                                                              |                   |
| Response to oxidatitive stress      | 5  | IDH1 Y391, GPX1 Y147, CAT Y231, CAT Y84, PRDX6 Y89                                                                                                                                                                                                                                                                                                                                                                                                                                             | GO                |
| Catalytic Site S/T Kinase           | 15 | p38-alpha Y182, PRP4 Y849, DYRK4 Y344, HIPK3 Y359, CDK2 Y15, GSK3B Y216 S219, HIPK1 Y352, CKDL5 Y171, p38-alpha Y182 T180, DYRK1B Y273, ERK2 Y185 T188/T183, ERK1 Y205 T203/T208, GSK3B Y216, ERK2 Y185, ERK1 Y205                                                                                                                                                                                                                                                                             | PTMScout          |
| Catalytic Site Y Kinase             | 15 | AXL Y697, TEC Y415, FAK Y577 T575, EphB4 Y774, InsR Y1175 Y1179, Abl Y393, Yes Y424, EphA2 Y773, Pyk2 Y579, FAK Y576, Pyk2 Y579 Y580, Lyn Y376, Fer Y715, JAK2 Y570, InsR Y1179/Y1175                                                                                                                                                                                                                                                                                                          | PTMScout          |
| PTP1b interactors                   | 39 | Dok1 Y450, BCAR1 Y238, EGFR Y1172, ZO1 Y1145, ST5 Y498, Dok1 Y408, BCAR1 Y291, BCAR1 Y556, FAK Y577 T575, Dok1 Y361, BCAR1 Y271, PLCG1 Y771, CAV1 Y14 Y6, EGFR Y1197, BCAR1 Y414, EGFR Y1092, FAK Y861, InsR Y1175 Y1179, BCAR1 Y391, ZO1 Y1360, CTNND1 Y904, BCAR1 Y253, PXN Y118, FAK Y397, FAK Y576, JAK2 Y570, ERK2 Y185 T188/T183, ZO1 Y1190, ERK1 Y205 T203/T208, InsR Y1179/Y1175, ZO1 Y1066, CTNND1 Y96, SHIP-2 Y1136, IRS1 Y983, IRS1 Y460, IRS1 Y935, ERK2 Y185, LPP Y318, ERK1 Y205 | MINT & Ren et al. |
| PTP1b substrate sites               | 7  | PLCG1 Y771, CAV1 Y14 Y6, EGFR Y1197, InsR Y1175 Y1179, InsR Y1179/Y1175, SHIP-2 Y1136, LPP Y318                                                                                                                                                                                                                                                                                                                                                                                                | Ren et al.        |
| Insulin-sensitive pYs in adipocytes | 33 | PARD3 Y1076, p38-alpha Y182, DLG3 Y705, SHP-2 Y62, Dok1 Y361, N-WASP Y253, GPRC5C Y386, IRS2 Y649, BCAR1 Y414, PTPRA Y825, talin 1 Y1116, BCAR1 Y253, DDX3X Y104, Met Y1001, PXN Y118, FAK Y397, CrkL Y132, ANKS1A Y472, Sgk269 Y632, IRS2 Y814, IRS1 Y983, IRS1 Y460, ANXA2 Y24, IRS1 Y935, ERK2 Y185, vigilin Y437, Nck1 Y105, ERK1 Y205, Shc1 Y313, SHP-2 Y584, ACBP Y29, ENO1 Y44, CALM1 Y100                                                                                              | Schmelzle et al.  |

**Table S4: Enrichment analysis of genotype-dependent phosphosites**

| <b>P<sub>raw</sub></b> | <b>NES</b> | <b>Category Label</b>        | <b>N</b> | <b>Category Membership</b>                                                                                                                                                                                                                                                                                                                                                                                                                                                                                                                                                                                                                                                                                                                                                                                                                                                                                                      | <b>Source</b>             |
|------------------------|------------|------------------------------|----------|---------------------------------------------------------------------------------------------------------------------------------------------------------------------------------------------------------------------------------------------------------------------------------------------------------------------------------------------------------------------------------------------------------------------------------------------------------------------------------------------------------------------------------------------------------------------------------------------------------------------------------------------------------------------------------------------------------------------------------------------------------------------------------------------------------------------------------------------------------------------------------------------------------------------------------|---------------------------|
| <2E-05**               | -3.47      | <b>Metabolic process</b>     | 29       | <i>HADHA Y724, CPS1 Y140, ACAT1 Y328, PCBD1 Y70, ARG1 Y218, GAPDH Y328, GLUD1 Y135, CPS1 Y1450, GLUD1 Y512, PGAM2 Y92, ARG1 Y197, CTH Y59, CAR2 Y114, CPS1 Y590, IDH1 Y391, GPX1 Y147, GAPDH Y316, PAH Y166*, ARG1 Y188, CPS1 Y162, PGM1 Y353, CTH Y113, LDHA Y239, PRDX6 Y89, ARG1 Y265, TGM2 Y369, CYP2E1 Y426, ENO1 Y44, CYB5A Y11</i>                                                                                                                                                                                                                                                                                                                                                                                                                                                                                                                                                                                       | GO                        |
| <2E-05**               | -3.58      | <b>Oxidation reduction</b>   | 29       | <i>HADHA Y724, UGDH Y108, GAPDH Y328, GLUD1 Y135, GLUD1 Y512, UOX Y230, HGD Y40, ACOX1 Y629, ALDH1L1 Y848, VDAC1 Y195, IDH1 Y391, ACAD11 Y323, UOX Y288, GPX1 Y147*, GAPDH Y316, FASN Y1248, HPD Y232, PAH Y166, ALDH6A1 Y268, ALDH1L1 Y892, CAT Y231, CAT Y84, LDHA Y239, PRDX6 Y89, CYP2E1 Y426, HPD Y221, SAHH Y193, ALDH1A7 Y484, CYB5A Y11</i>                                                                                                                                                                                                                                                                                                                                                                                                                                                                                                                                                                             | GO, SwissProt, Literature |
| <2E-05**               | -3.10      | <b>Endoplasmic Reticulum</b> | 18       | <i>CAVI Y14 Y6, ALDOB Y204, HSPD1 Y243, PEBP1 Y181, ASS1 Y29, ASS1 Y133, HPD Y232*, ASS1 Y322, HSPD1 Y385, GLUL Y336, CAT Y231, CAT Y84, VCP Y173, ACSL5 Y69, CYP2E1 Y426, CALM1 Y100, HPD Y221, CYB5A Y11,</i>                                                                                                                                                                                                                                                                                                                                                                                                                                                                                                                                                                                                                                                                                                                 | GO                        |
| <2E-05**               | -3.66      | <b>Cytosol</b>               | 108      | <i>Lyn Y173, Dok1 Y450, BCAR1 Y238, FBP1 Y216, Yes Y220, Fgr Y197, RPL13A Y137, p38-alpha Y182, Crk Y251, afadin Y1285, PIK3R1 Y197, Dok1 Y408, BCAR1 Y291, SHP-2 Y62, BCAR1 Y556, FAK Y577 T575, Dok1 Y361, vinculin Y822, BCAR1 Y271, SEC14L4 Y36, FBP1 Y265, PLCG1 Y771, CAVI Y14 Y6, eEF1A1 Y177, IRS2 Y649, GRF-1 Y1087, STAT3 Y686, BCAR1 Y414, DLG1 Y783, Yes Y192, FAK Y861, InsR Y1175 Y1179, BCAR1 Y391, GOT1 Y264, vinculin Y692, UGDH Y108, CDK2 Y15, Abl Y393, GSK3B Y216 S219, afadin Y1230, CTNND1 Y904, talin 1 Y1116, BCAR1 Y253, Yes Y424, CTNNB1 Y654, PGAM2 Y92, CrkL Y198, PGK1 Y196, ALDOB Y204, LHPP Y159, SCAP2 Y260, FAK Y397, FAK Y576, WASP Y293, talin 1 Y26, CrkL Y132, p38-alpha Y182 T180, Hrs Y216, Lyn Y376, OTC Y317, JAK2 Y570, CAR2 Y114, ERK2 Y185 T188/T183, ERK1 Y205 T203/T208*, SEC14L4 Y36, GSK3B Y216, FBP1 Y245, InsR Y1179/Y1175, plectin 1 Y288, IRS2 Y814, HSPD1 Y243, SHMT1</i> | GO                        |



|           |       |                                        |    |                                                                                                                                                                                                                                                                                                                                                                                                                     |                             |
|-----------|-------|----------------------------------------|----|---------------------------------------------------------------------------------------------------------------------------------------------------------------------------------------------------------------------------------------------------------------------------------------------------------------------------------------------------------------------------------------------------------------------|-----------------------------|
|           |       |                                        |    | Y67, IDH1 Y391, CTNND1 Y96, TARS Y297, GRF-1 Y1105, IRS1 Y983, IRS1 Y460, IRS1 Y935, ERK2 Y185, PIK3R1 Y310, GPX1 Y147, GOT1 Y71, HSP90A Y285, IRS2 Y671, SHMT1 Y28, FASN Y1248, HPD Y232, Nck1 Y105, ERK1 Y205, ACLY Y672, HSPD1 Y385, PGM1 Y353, GNMT Y22, CAT Y231, CAT Y84, LDHA Y239, Shc1 Y313, VCP Y173, PRDX6 Y89, GNMT Y34, SHP-2 Y584, PITPNA Y141, GNMT Y221, TGM2 Y369, CALM1 Y100, HPD Y221, SAHH Y193 |                             |
| 3.2E-05** | -2.41 | <b>Insulin signaling pathway</b>       | 25 | <i>FBP1 Y216, Crk Y251, PIK3R1 Y197, FBP1 Y265, IRS2 Y649, InsR Y1175 Y1179, GSK3B Y216 S219, CrkL Y198, CrkL Y132, ERK2 Y185 T188/T183*, ERK1 Y205 T203/T208, GSK3B Y216, FBP1 Y245, InsR Y1179/Y1175, IRS2 Y814, IRS1 Y983, IRS1 Y460, IRS1 Y935, ERK2 Y185, PIK3R1 Y310, IRS2 Y671, FASN Y1248, ERK1 Y205, Shc1 Y313, CALM1 Y100</i>                                                                             | KEGG                        |
| 3.2E-05** | -2.40 | <b>Lipid metabolism</b>                | 11 | <i>HADHA Y724, ACAT1 Y328, ACAA2 Y198, ACSM3 Y51, ACOX1 Y629, vigilin Y437*, ACLY Y672, PRDX6 Y89, ACSL5 Y69, ACBP Y29, CYB5A Y11</i>                                                                                                                                                                                                                                                                               | KEGG, SwissProt, Literature |
| 1.4E-04** | 2.45  | <b>Tight junction</b>                  | 20 | <i>PARD3 Y1076, CLDN2 Y194/Y195, CTNNA1 Y177, PARD3 Y1123, Yes Y220, F11R Y281, ZO1 Y1145, CLDN3 Y197, afadin Y1285*, CTNNA1 Y619, MAGI1 Y361, Yes Y192, ZO1 Y1360, CGN Y229, afadin Y1230, Yes Y424, CTNNB1 Y654, ZO2 Y486, ZO1 Y1190, ZO1 Y1066</i>                                                                                                                                                               | KEGG                        |
| 2.3E-04*  | -2.30 | <b>Fatty acid metabolism</b>           | 9  | <i>HADHA Y724, ACAT1 Y328, ACAA2 Y198, ACOX1 Y629, ACLY Y672*, PRDX6 Y89, ACSL5 Y69, ACBP Y29, CYB5A Y11</i>                                                                                                                                                                                                                                                                                                        | KEGG, Literature            |
| 4.5E-04*  | -2.26 | <b>Neurotrophin signaling pathway</b>  | 25 | <i>p38-alpha Y182, Crk Y251, PIK3R1 Y197, SHP-2 Y62, PLCG1 Y771, IRS2 Y649, Abl Y393, GSK3B Y216 S219, CrkL Y198, CrkL Y132, p38-alpha Y182 T180, ERK2 Y185 T188/T183, ERK1 Y205 T203/T208, GSK3B Y216, IRS2 Y814, IRS1 Y983*, IRS1 Y460, IRS1 Y935, ERK2 Y185, PIK3R1 Y310, IRS2 Y671, ERK1 Y205, Shc1 Y313, SHP-2 Y584, CALM1 Y100</i>                                                                            | KEGG                        |
| 4.5E-04*  | -2.27 | <b>Arginine and proline metabolism</b> | 19 | <i>CPS1 Y140, GOT1 Y264, ARG1 Y218, GLUD1 Y135, CPS1 Y1450, GLUD1 Y512, ARG1 Y197, OTC Y317, GOT2 Y96, CPS1 Y590, ASS1 Y29, GOT1 Y71*, ASS1 Y133, ASS1 Y322, GOT2 Y284, ARG1 Y188, CPS1 Y162, GLUL Y336, ARG1 Y265</i>                                                                                                                                                                                              | KEGG                        |
| 5.2E-04*  | -2.25 | <b>Mitochondria</b>                    | 35 | <i>Lyn Y173, PC Y118, HADHA Y724, FH Y488, CPS1 Y140, HSPE1 Y76, SLC25A5 Y191, SLC25A5 Y81, ACAT1 Y328, FH Y462, GLUD1</i>                                                                                                                                                                                                                                                                                          | GO                          |

|          |       |                                            |    |                                                                                                                                                                                                                                                                                                                                                                                                                          |                  |
|----------|-------|--------------------------------------------|----|--------------------------------------------------------------------------------------------------------------------------------------------------------------------------------------------------------------------------------------------------------------------------------------------------------------------------------------------------------------------------------------------------------------------------|------------------|
|          |       |                                            |    | <i>Y135, CPS1 Y1450, GLUD1 Y512, ACAA2 Y198, ACSM3 Y51, Lyn Y376, OTC Y317, NIPSNAP1 Y148, GOT2 Y96, NIPSNAP1 Y261, CPS1 Y590, VDAC1 Y195, HSPD1 Y243, PEBP1 Y181, ASS1 Y29, PHB Y249, ASS1 Y133, ASS1 Y322*, GOT2 Y284, CPS1 Y162, HSPD1 Y385, CAT Y231, CAT Y84, ACCL5 Y69, CYB5A Y11</i>                                                                                                                              |                  |
| 6.5E-04* | -2.24 | <b>Phenylalanine metabolism</b>            | 8  | <i>GOT1 Y264, GOT2 Y96, GOT1 Y71*, HPD Y232, GOT2 Y284, PAH Y166, PRDX6 Y89, HPD Y221</i>                                                                                                                                                                                                                                                                                                                                | KEGG             |
| 7.1E-04* | -2.22 | <b>Glycolysis / Gluconeogenesis</b>        | 12 | <i>FBP1 Y216, FBP1 Y265, GAPDH Y328, PGAM2 Y92, PGK1 Y196, ALDOB Y204, FBP1 Y245, GAPDH Y316, PGM1 Y353*, LDHA Y239, ENO1 Y44, ENO1 Y25</i>                                                                                                                                                                                                                                                                              | KEGG             |
| 1.1E-03^ | -2.16 | <b>Golgi apparatus</b>                     | 17 | <i>Lyn Y173, ZO1 Y1145, DYRK4 Y344, CAV1 Y14 Y6, ZO1 Y1360, Lyn Y376, ZO1 Y1190, HSPD1 Y243, PEBP1 Y181, ZO1 Y1066, FASN Y1248*, HPD Y232, HSPD1 Y385, GLUL Y336, CAT Y231, CAT Y84, HPD Y221</i>                                                                                                                                                                                                                        | GO               |
| 1.1E-03^ | -2.16 | <b>Insulin-sensitive pYs in adipocytes</b> | 33 | <i>PROSC Y69, Lyn y173, PARD3 Y1076, Dok1 Y450, CLDN2 Y194/Y195, HADHA Y274, FBP1 Y216, FH Y488, TEC Y415, PARD3 Y1123, CPS1 Y140, EGFR Y1172, Yes Y220, RPL13A Y137, p38-alpha Y182, CLTC Y899, Crk Y251, afadin Y1285, tensin 1 Y1558, PRP4 Y849, Shb Y432, Eef1a1 y141, DYRK4 Y344, PIK3R1 Y197, Dok1 Y408, ATP1A1 Y260*, HBD Y42, CARKD Y81, BCAR1 Y556, FAK Y577 T575, tensin 1 Y1480, PECAM-1 Y702, TENC1 Y705</i> | Schmelzle et al. |
| 1.8E-03^ | -2.09 | <b>Cysteine and methionine metabolism</b>  | 9  | <i>GOT1 Y264, BHMT Y289, CTH Y59, GOT2 Y96, GOT1 Y71*, GOT2 Y284, CTH Y113, LDHA Y239, SAHH Y193</i>                                                                                                                                                                                                                                                                                                                     | KEGG             |

NES stands for normalized enrichment scores as described in Methods. \*\* = FDR = .01, \* = FDR = .05, ^ = FDR = .1. NES > 0 indicates that phosphorylation on sites in pathway significantly decrease with PTP1b deletion, while NES < 0 indicates that phosphorylation on sites in the pathway are hyperphosphorylated upon PTP1b deletion. The phosphosites in each category membership are ordered from most PTP1b-dependent decreased phosphorylation to most PTP1b-dependent increased phosphorylation. Those phosphosites that contributed most to the enrichment (compose the “leading edge”) appear in regular font, while the other sites in that category are italicized.

**Table S5: Enrichment of diet-dependent phosphosites**

| <b>P<sub>raw</sub></b> | <b>NES</b> | <b>Category Label</b> | <b>N</b> | <b>Category Membership</b>                                                                                                                                                                                                                                      | <b>Source</b> |
|------------------------|------------|-----------------------|----------|-----------------------------------------------------------------------------------------------------------------------------------------------------------------------------------------------------------------------------------------------------------------|---------------|
| 2.2E-04**              | 2.28       | <b>Mitochondria</b>   | 22       | HSPE1 Y76, NIPSNAP1 Y261, SLC25A5 Y191, GOT2 Y96, GLUD1 Y512, CAT Y231*, <i>GLUD1 Y135, PHB Y249, ACAT1 Y328, CAT Y84, PC Y118, CPS1 Y162, Lyn Y173, ACAA2 Y198, HSPD1 Y243, ACSL5 Y69, CPS1 Y1450, CYB5A Y11, ASS1 Y322, HSPD1 Y385, Lyn Y376, SLC25A5 Y81</i> | GO            |

NES stands for normalized enrichment scores. \*\* = FDR = .01, \* = FDR = .05, ^ = FDR = .1. NES > 0 indicates that phosphorylation on sites in pathway significantly increase upon HFD, while NES < 0 indicates that phosphorylation on sites in the pathway have reduced phosphorylation under HFD. The phosphosites in each category membership are ordered from most positively HFD-dependent to most negatively HFD-dependent phosphorylation. Those phosphosites that contributed most to the enrichment (compose the “leading edge”) appear in regular font, while the other sites in that category are italicized.

**Table S6: Quantification of hepatic free fatty acids**

| <b>Absolute quantification of hepatic free fatty acids (pmol FFA / mg liver tissue)</b> |                            |                              |                                |                              |
|-----------------------------------------------------------------------------------------|----------------------------|------------------------------|--------------------------------|------------------------------|
|                                                                                         | <b>NC</b>                  |                              | <b>HFD</b>                     |                              |
|                                                                                         | <b>Control</b>             | <b>L-PTP1b<sup>-/-</sup></b> | <b>Control</b>                 | <b>L-PTP1b<sup>-/-</sup></b> |
| <b>C16:3</b>                                                                            | 0.0537 +/- 0.00785 (n = 7) | 0.0626 +/- 0.0162 (n = 3)    | 0.0515 +/- 0.00988 (n = 10)    | 0.044 +/- 0.0127 (n = 9)     |
| <b>C16:2</b>                                                                            | 0.135 +/- 0.017 (n = 7)    | 0.134 +/- 0.0253 (n = 3)     | 0.442 +/- 0.0556 (n = 11)**    | 0.64 +/- 0.212 (n = 10)      |
| <b>C16:1</b>                                                                            | 3.35 +/- 0.349 (n = 9)     | 3.11 +/- 0.427 (n = 7)       | 8.4 +/- 1.27 (n = 19)*         | 8.32 +/- 1.38 (n = 17)       |
| <b>C16:0</b>                                                                            | 43.6 +/- 2.89 (n = 9)      | 43.2 +/- 2.04 (n = 7)        | 76.4 +/- 15.2 (n = 19)         | 59.3 +/- 4.78 (n = 17)       |
| <b>C18:3 ω3 + ω6</b>                                                                    | 1.06 +/- 0.174 (n = 7)     | 1.11 +/- 0.155 (n = 3)       | 0.441 +/- 0.103 (n = 19)*      | 0.47 +/- 0.142 (n = 17)      |
| <b>C18:3 ω7*</b>                                                                        | n.d.                       | n.d.                         | 0.112 +/- 0.0135 (n = 19)      | 0.175 +/- 0.0247 (n = 17)    |
| <b>C18:2</b>                                                                            | 13.1 +/- 2.09 (n = 9)      | 11.5 +/- 2.22 (n = 7)        | 16.9 +/- 3.36 (n = 19)         | 14.2 +/- 1.9 (n = 17)        |
| <b>C18:1</b>                                                                            | 16.8 +/- 1.42 (n = 9)      | 17.7 +/- 2.89 (n = 7)        | 64.3 +/- 12.4 (n = 19)*        | 57.5 +/- 6.89 (n = 17)       |
| <b>C18:0</b>                                                                            | 23.7 +/- 1.95 (n = 9)      | 23.6 +/- 1.84 (n = 7)        | 36.4 +/- 5.63 (n = 19)         | 28.6 +/- 2.02 (n = 17)       |
| <b>C20:5</b>                                                                            | 2.03 +/- 0.32 (n = 9)      | 3.14 +/- 1.49 (n = 7)        | 0.0894 +/- 0.0138 (n = 19)***  | 0.0865 +/- 0.0145 (n = 17)   |
| <b>C20:4</b>                                                                            | 3.28 +/- 0.828 (n = 9)     | 2.33 +/- 0.528 (n = 7)       | 4.59 +/- 1.2 (n = 19)          | 4.42 +/- 0.68 (n = 17)       |
| <b>C20:3 ω3 + ω6</b>                                                                    | 0.37 +/- 0.0503 (n = 7)    | 0.544 +/- 0.129 (n = 3)      | 0.43 +/- 0.0575 (n = 19)       | 0.5 +/- 0.0484 (n = 17)      |
| <b>C20:3 ω9 + ω7*</b>                                                                   | 0.076 +/- 0.00841 (n = 7)  | 0.0893 +/- 0.0122 (n = 3)    | 0.328 +/- 0.0571 (n = 19)*     | 0.631 +/- 0.0768 (n = 17)**  |
| <b>C20:2</b>                                                                            | 0.351 +/- 0.0396 (n = 7)   | 0.477 +/- 0.0783 (n = 3)     | 0.693 +/- 0.143 (n = 19)       | 1.04 +/- 0.133 (n = 17)      |
| <b>C20:1</b>                                                                            | 1.04 +/- 0.159 (n = 9)     | 1.03 +/- 0.228 (n = 7)       | 2.92 +/- 0.635 (n = 19)        | 2.83 +/- 0.258 (n = 17)      |
| <b>C20:0</b>                                                                            | 0.762 +/- 0.0862 (n = 7)   | 0.721 +/- 0.0948 (n = 3)     | 1.15 +/- 0.327 (n = 19)        | 0.6 +/- 0.085 (n = 17)       |
| <b>C22:6</b>                                                                            | 7.25 +/- 1.27 (n = 9)      | 5.47 +/- 1.07 (n = 7)        | 1.38 +/- 0.233 (n = 19)***     | 1.2 +/- 0.132 (n = 17)       |
| <b>C22:5</b>                                                                            | 0.91 +/- 0.119 (n = 7)     | 1.22 +/- 0.27 (n = 3)        | 0.429 +/- 0.0723 (n = 19)**    | 0.457 +/- 0.0319 (n = 17)    |
| <b>C22:4</b>                                                                            | 0.221 +/- 0.0234 (n = 7)   | 0.303 +/- 0.0817 (n = 3)     | 0.279 +/- 0.0424 (n = 19)      | 0.308 +/- 0.0292 (n = 17)    |
| <b>C22:3 ω3 + ω6*</b>                                                                   | 0.0159 +/- 0.00434 (n = 6) | 0.0307 +/- 0.00698 (n = 3)   | 0.0177 +/- 0.00297 (n = 18)    | 0.0256 +/- 0.00281 (n = 17)  |
| <b>C22:3 ω9* + ω7*</b>                                                                  | n.d.                       | n.d.                         | 0.0489 +/- 0.00942 (n = 19)    | 0.0889 +/- 0.01 (n = 17)**   |
| <b>C22:2</b>                                                                            | 0.0352 +/- 0.00529 (n = 7) | 0.0436 +/- 0.00468 (n = 3)   | 0.0586 +/- 0.0205 (n = 11)     | 0.0641 +/- 0.0065 (n = 10)   |
| <b>C22:1</b>                                                                            | 0.232 +/- 0.0338 (n = 7)   | 0.263 +/- 0.0191 (n = 3)     | 0.406 +/- 0.115 (n = 19)       | 0.313 +/- 0.0346 (n = 17)    |
| <b>C22:0</b>                                                                            | 0.446 +/- 0.039 (n = 7)    | 0.407 +/- 0.0248 (n = 3)     | 0.705 +/- 0.256 (n = 19)       | 0.36 +/- 0.0555 (n = 17)     |
| <b>C24:6</b>                                                                            | 0.103 +/- 0.0145 (n = 7)   | 0.141 +/- 0.0334 (n = 3)     | 0.0269 +/- 0.00412 (n = 19)*** | 0.0377 +/- 0.0028 (n = 17)^  |
| <b>C24:5</b>                                                                            | 0.0822 +/- 0.0124 (n = 7)  | 0.118 +/- 0.0403 (n = 3)     | 0.0495 +/- 0.00695 (n = 19)*   | 0.0753 +/- 0.00682 (n = 17)* |
| <b>C24:4</b>                                                                            | 0.0146 +/- 0.00438 (n = 6) | 0.0254 +/- 0.0105 (n = 3)    | 0.047 +/- 0.00757 (n = 11)*    | 0.0735 +/- 0.0103 (n = 10)^  |
| <b>C24:3</b>                                                                            | n.d.                       | n.d.                         | 0.0124 +/- 0.00715 (n = 3)     | 0.0124 +/- 0.0045 (n = 4)    |

|              |                            |                            |                            |                             |
|--------------|----------------------------|----------------------------|----------------------------|-----------------------------|
| <b>C24:2</b> | 0.0739 +/- 0.00409 (n = 7) | 0.0768 +/- 0.00994 (n = 3) | 0.0481 +/- 0.0112 (n = 11) | 0.0432 +/- 0.00423 (n = 10) |
| <b>C24:1</b> | 0.415 +/- 0.0435 (n = 7)   | 0.397 +/- 0.0449 (n = 3)   | 0.332 +/- 0.0987 (n = 11)  | 0.225 +/- 0.0244 (n = 10)   |
| <b>C24:0</b> | 0.461 +/- 0.049 (n = 7)    | 0.472 +/- 0.0639 (n = 3)   | 0.559 +/- 0.26 (n = 11)    | 0.503 +/- 0.252 (n = 10)    |
| <b>Total</b> | 130 +/- 6 (n = 7)          | 137 +/- 17 (n = 3)         | 218 +/- 40 (n = 19)        | 183 +/- 17 (n = 17)         |

| <b>% Composition of hepatic free fatty acids pool</b> |                            |                              |                                |                               |
|-------------------------------------------------------|----------------------------|------------------------------|--------------------------------|-------------------------------|
|                                                       | <b>NC</b>                  |                              | <b>HFD</b>                     |                               |
|                                                       | <b>Control</b>             | <b>L-PTP1b<sup>-/-</sup></b> | <b>Control</b>                 | <b>L-PTP1b<sup>-/-</sup></b>  |
| <b>C16:3</b>                                          | 0.0412 +/- 0.00432 (n = 7) | 0.0453 +/- 0.00846 (n = 3)   | 0.0196 +/- 0.00271 (n = 10)*** | 0.0171 +/- 0.00219 (n = 9)    |
| <b>C16:2</b>                                          | 0.108 +/- 0.0075 (n = 7)   | 0.0976 +/- 0.00876 (n = 3)   | 0.189 +/- 0.0138 (n = 11)***   | 0.244 +/- 0.0351 (n = 10)     |
| <b>C16:1</b>                                          | 2.85 +/- 0.182 (n = 7)     | 3.07 +/- 0.0928 (n = 3)      | 3.86 +/- 0.182 (n = 19)*       | 3.98 +/- 0.17 (n = 17)        |
| <b>C16:0</b>                                          | 40.7 +/- 4.02 (n = 7)      | 33.3 +/- 1.18 (n = 3)        | 36.9 +/- 1.32 (n = 19)         | 34.6 +/- 1.02 (n = 17)        |
| <b>C18:3 ω3 + ω6</b>                                  | 0.84 +/- 0.077 (n = 7)     | 0.819 +/- 0.0571 (n = 3)     | 0.232 +/- 0.0133 (n = 19)***   | 0.323 +/- 0.0742 (n = 17)     |
| <b>C18:3 ω7*</b>                                      | n.d.                       | n.d.                         | 0.0542 +/- 0.0038 (n = 19)     | 0.0844 +/- 0.00497 (n = 17)** |
| <b>C18:2</b>                                          | 11.6 +/- 1.11 (n = 7)      | 12.1 +/- 1.21 (n = 3)        | 7.22 +/- 0.38 (n = 19)***      | 6.94 +/- 0.31 (n = 17)        |
| <b>C18:1</b>                                          | 14.7 +/- 0.851 (n = 7)     | 17.9 +/- 0.654 (n = 3)^      | 27.7 +/- 1.58 (n = 19)***      | 28.7 +/- 1.29 (n = 17)        |
| <b>C18:0</b>                                          | 22.8 +/- 2.98 (n = 7)      | 18.5 +/- 2.07 (n = 3)        | 21 +/- 1.31 (n = 19)           | 18.9 +/- 0.904 (n = 17)       |
| <b>C20:5</b>                                          | 1.94 +/- 0.202 (n = 7)     | 1.85 +/- 0.211 (n = 3)       | 0.0435 +/- 0.00367 (n = 19)*** | 0.0418 +/- 0.00408 (n = 17)   |
| <b>C20:4</b>                                          | 2.93 +/- 0.551 (n = 7)     | 2.52 +/- 0.507 (n = 3)       | 1.98 +/- 0.234 (n = 19)        | 2.27 +/- 0.337 (n = 17)       |
| <b>C20:3 ω3 + ω6</b>                                  | 0.305 +/- 0.0316 (n = 7)   | 0.399 +/- 0.0769 (n = 3)     | 0.203 +/- 0.014 (n = 19)**     | 0.254 +/- 0.00879 (n = 17)**  |
| <b>C20:3 ω9 + ω7*</b>                                 | 0.0626 +/- 0.00406 (n = 7) | 0.0658 +/- 0.00267 (n = 3)   | 0.154 +/- 0.0135 (n = 19)***   | 0.322 +/- 0.0285 (n = 17)***  |
| <b>C20:2</b>                                          | 0.295 +/- 0.0336 (n = 7)   | 0.35 +/- 0.0205 (n = 3)      | 0.304 +/- 0.0328 (n = 19)      | 0.535 +/- 0.0589 (n = 17)**   |
| <b>C20:1</b>                                          | 0.954 +/- 0.13 (n = 7)     | 1.19 +/- 0.0775 (n = 3)      | 1.2 +/- 0.13 (n = 19)          | 1.5 +/- 0.133 (n = 17)        |
| <b>C20:0</b>                                          | 0.651 +/- 0.0893 (n = 7)   | 0.541 +/- 0.0869 (n = 3)     | 0.453 +/- 0.0812 (n = 19)      | 0.308 +/- 0.0256 (n = 17)     |
| <b>C22:6</b>                                          | 6.54 +/- 0.744 (n = 7)     | 5.74 +/- 0.928 (n = 3)       | 0.648 +/- 0.0555 (n = 19)***   | 0.644 +/- 0.0787 (n = 17)     |
| <b>C22:5</b>                                          | 0.77 +/- 0.0994 (n = 7)    | 0.903 +/- 0.176 (n = 3)      | 0.204 +/- 0.0229 (n = 19)***   | 0.25 +/- 0.021 (n = 17)       |
| <b>C22:4</b>                                          | 0.187 +/- 0.023 (n = 7)    | 0.223 +/- 0.0531 (n = 3)     | 0.133 +/- 0.0137 (n = 19)      | 0.159 +/- 0.0119 (n = 17)     |
| <b>C22:3 ω3 + ω6*</b>                                 | 0.0131 +/- 0.00746 (n = 5) | 0.0161 +/- 0.00299 (n = 3)   | 0.00829 +/- 0.00129 (n = 18)   | 0.0139 +/- 0.00166 (n = 17)*  |
| <b>C22:3 ω9* + ω7*</b>                                | n.d.                       | n.d.                         | 0.0247 +/- 0.00274 (n = 19)    | 0.0514 +/- 0.00524 (n = 17)** |
| <b>C22:2</b>                                          | 0.0311 +/- 0.00653 (n = 7) | 0.0323 +/- 0.00092 (n = 3)   | 0.0223 +/- 0.00626 (n = 11)    | 0.0324 +/- 0.00388 (n = 10)   |
| <b>C22:1</b>                                          | 0.199 +/- 0.0337 (n = 7)   | 0.198 +/- 0.027 (n = 3)      | 0.179 +/- 0.0367 (n = 19)      | 0.164 +/- 0.0117 (n = 17)     |

|              |                            |                            |                                |                               |
|--------------|----------------------------|----------------------------|--------------------------------|-------------------------------|
| <b>C22:0</b> | 0.376 +/- 0.0337 (n = 7)   | 0.309 +/- 0.0557 (n = 3)   | 0.303 +/- 0.0828 (n = 19)      | 0.187 +/- 0.0188 (n = 17)     |
| <b>C24:6</b> | 0.0831 +/- 0.00985 (n = 7) | 0.103 +/- 0.0206 (n = 3)   | 0.0128 +/- 0.00161 (n = 19)*** | 0.0205 +/- 0.00187 (n = 17)** |
| <b>C24:5</b> | 0.0687 +/- 0.0117 (n = 7)  | 0.0841 +/- 0.0244 (n = 3)  | 0.0242 +/- 0.00293 (n = 19)*** | 0.0417 +/- 0.00487 (n = 17)** |
| <b>C24:4</b> | 0.0127 +/- 0.00452 (n = 6) | 0.0182 +/- 0.00691 (n = 3) | 0.0193 +/- 0.00189 (n = 11)    | 0.0345 +/- 0.00435 (n = 10)** |
| <b>C24:3</b> | n.d.                       | n.d.                       | 0.00349 +/- 0.0017 (n = 3)     | 0.0079 +/- 0.00284 (n = 4)    |
| <b>C24:2</b> | 0.0625 +/- 0.00539 (n = 7) | 0.0571 +/- 0.00605 (n = 3) | 0.0206 +/- 0.00366 (n = 11)*** | 0.0215 +/- 0.00223 (n = 10)   |
| <b>C24:1</b> | 0.358 +/- 0.0476 (n = 7)   | 0.295 +/- 0.0268 (n = 3)   | 0.14 +/- 0.032 (n = 11)**      | 0.113 +/- 0.0138 (n = 10)     |
| <b>C24:0</b> | 0.392 +/- 0.0439 (n = 7)   | 0.364 +/- 0.097 (n = 3)    | 0.223 +/- 0.0865 (n = 11)      | 0.195 +/- 0.0474 (n = 10)     |

Quantification of liver free fatty acids is written as mean +/- standard error for each of the diet and genotype conditions. The number of mice analyzed per condition is denoted in parentheses. Statistical analysis was performed using one-way ANOVA with sequential Sidak-Dunn method to adjust for multiple comparisons: (1) L-PTP1b<sup>-/-</sup> mice to control on NC diet, (2) L-PTP1b<sup>-/-</sup> mice to control on HFD, and (3) HFD control to NC control. \*\*\* = P<.001, \*\* = P<.01, \* = P < .05, ^ = P<.1. An asterick by fatty acid species indicates that the fatty acid measurement likely corresponds to that species, but its identification was not rigorously confirmed with a standard.

**Table S7: Quantification of hepatic triglycerides and total cholesterol**

| <b>Absolute quantification of triglycerides and cholesterol (nmol lipid / mg liver tissue)</b> |                          |                              |                                          |                                      |
|------------------------------------------------------------------------------------------------|--------------------------|------------------------------|------------------------------------------|--------------------------------------|
|                                                                                                | <b>NC</b>                |                              | <b>HFD</b>                               |                                      |
|                                                                                                | <b>Control</b>           | <b>L-PTP1b<sup>-/-</sup></b> | <b>Control</b>                           | <b>L-PTP1b<sup>-/-</sup></b>         |
| <b>Tg C48:3</b>                                                                                | 0.126 +/- 0.0434 (n = 7) | 0.104 +/- 0.0477 (n = 3)     | 0.0848 +/- 0.0237 (n = 10)               | 0.116 +/- 0.0218 (n = 7)             |
| <b>Tg C48:2</b>                                                                                | 0.305 +/- 0.107 (n = 7)  | 0.25 +/- 0.114 (n = 3)       | 0.167 +/- 0.0473 (n = 10)                | 0.36 +/- 0.0767 (n = 7) <sup>^</sup> |
| <b>Tg C48:1</b>                                                                                | n.d.                     | n.d.                         | 0.0942 +/- 0.0235 (n = 6)                | 0.362 +/- 0.0605 (n = 5)             |
| <b>Tg C50:4</b>                                                                                | 0.373 +/- 0.12 (n = 7)   | 0.398 +/- 0.187 (n = 3)      | 0.252 +/- 0.0751 (n = 10)                | 0.551 +/- 0.112 (n = 7) <sup>^</sup> |
| <b>Tg C50:3</b>                                                                                | 1.74 +/- 0.597 (n = 7)   | 2.14 +/- 1.02 (n = 3)        | 1.15 +/- 0.349 (n = 10)                  | 3 +/- 0.645 (n = 7) <sup>*</sup>     |
| <b>Tg C50:2</b>                                                                                | 3.15 +/- 1.06 (n = 7)    | 3.64 +/- 1.62 (n = 3)        | 1.92 +/- 0.636 (n = 10)                  | 5.98 +/- 1.27 (n = 7) <sup>*</sup>   |
| <b>Tg C50:1</b>                                                                                | 0.953 +/- 0.284 (n = 7)  | 1.08 +/- 0.431 (n = 3)       | 0.754 +/- 0.238 (n = 10)                 | 2.28 +/- 0.476 (n = 7) <sup>*</sup>  |
| <b>Tg C52:5</b>                                                                                | 1.67 +/- 0.51 (n = 7)    | 0.946 +/- 0.579 (n = 3)      | 0.674 +/- 0.184 (n = 10)                 | 1.25 +/- 0.236 (n = 7)               |
| <b>Tg C52:4</b>                                                                                | 10.8 +/- 2.93 (n = 7)    | 14 +/- 5.61 (n = 3)          | 4.75 +/- 1.38 (n = 10) <sup>^</sup>      | 9.53 +/- 1.78 (n = 7)                |
| <b>Tg C52:3</b>                                                                                | 16.7 +/- 4.06 (n = 7)    | 24.9 +/- 9.58 (n = 3)        | 13.1 +/- 3.95 (n = 10)                   | 33.4 +/- 7.29 (n = 6) <sup>*</sup>   |
| <b>Tg C52:2</b>                                                                                | 5.49 +/- 1.2 (n = 7)     | 9.44 +/- 3.21 (n = 3)        | 11 +/- 3.73 (n = 10)                     | 35.6 +/- 8.6 (n = 6) <sup>*</sup>    |
| <b>Tg C54:7</b>                                                                                | 1.21 +/- 0.345 (n = 7)   | 1.32 +/- 0.517 (n = 3)       | 0.111 +/- 0.043 (n = 4) <sup>^</sup>     | 0.0857 +/- 0.0159 (n = 6)            |
| <b>Tg C54:6</b>                                                                                | 2.63 +/- 0.713 (n = 7)   | 2.97 +/- 1.46 (n = 3)        | 0.628 +/- 0.157 (n = 10) <sup>*</sup>    | 0.67 +/- 0.126 (n = 7)               |
| <b>Tg C54:5</b>                                                                                | 3.84 +/- 0.996 (n = 7)   | 4.97 +/- 2.31 (n = 3)        | 2.57 +/- 0.586 (n = 10)                  | 3.62 +/- 0.682 (n = 7)               |
| <b>Tg C54:4</b>                                                                                | 3.56 +/- 0.891 (n = 7)   | 5.1 +/- 2.13 (n = 3)         | 5.76 +/- 1.32 (n = 10)                   | 10.7 +/- 2.04 (n = 7)                |
| <b>Tg C54:3</b>                                                                                | 1.62 +/- 0.337 (n = 7)   | 2.36 +/- 0.898 (n = 3)       | 5.78 +/- 1.47 (n = 10) <sup>^</sup>      | 14.2 +/- 3.19 (n = 7) <sup>*</sup>   |
| <b>Tg C54:2</b>                                                                                | 0.243 +/- 0.0419 (n = 7) | 0.304 +/- 0.087 (n = 3)      | 0.762 +/- 0.302 (n = 10)                 | 2.2 +/- 0.535 (n = 7) <sup>^</sup>   |
| <b>Tg C56:10</b>                                                                               | 0.0396 +/- 0.011 (n = 7) | 0.037 +/- 0.0186 (n = 3)     | n.d.                                     | n.d.                                 |
| <b>Tg C56:9</b>                                                                                | 0.437 +/- 0.113 (n = 7)  | 0.471 +/- 0.208 (n = 3)      | 0.0175 +/- 0.00452 (n = 8) <sup>**</sup> | 0.0118 +/- 0.00195 (n = 6)           |
| <b>Tg C56:8</b>                                                                                | 4.47 +/- 1.1 (n = 7)     | 5.23 +/- 2.12 (n = 3)        | 0.115 +/- 0.0274 (n = 10) <sup>***</sup> | 0.0768 +/- 0.0146 (n = 7)            |
| <b>Tg C56:7</b>                                                                                | 3.25 +/- 0.695 (n = 7)   | 4.48 +/- 1.84 (n = 3)        | 0.385 +/- 0.105 (n = 10) <sup>***</sup>  | 0.323 +/- 0.0551 (n = 7)             |
| <b>Tg C56:6</b>                                                                                | 0.626 +/- 0.135 (n = 7)  | 0.829 +/- 0.345 (n = 3)      | 0.408 +/- 0.122 (n = 10)                 | 0.546 +/- 0.0985 (n = 7)             |
| <b>Tg C56:5</b>                                                                                | 0.264 +/- 0.0485 (n = 7) | 0.367 +/- 0.144 (n = 3)      | 0.374 +/- 0.109 (n = 10)                 | 0.801 +/- 0.154 (n = 7) <sup>^</sup> |
| <b>Tg C56:4</b>                                                                                | 0.179 +/- 0.033 (n = 7)  | 0.235 +/- 0.0954 (n = 3)     | 0.36 +/- 0.133 (n = 10)                  | 1.1 +/- 0.254 (n = 7) <sup>*</sup>   |
| <b>Tg C56:3</b>                                                                                | n.d.                     | n.d.                         | 0.162 +/- 0.0391 (n = 6)                 | 1.33 +/- 0.373 (n = 5)               |
| <b>Tg C56:2</b>                                                                                | n.d.                     | n.d.                         | 0.0304 +/- 0.0112 (n = 6)                | 0.0941 +/- 0.0314 (n = 5)            |
| <b>Total Triglycerides</b>                                                                     | 62 +/- 16 (n = 7)        | 84 +/- 33 (n = 3)            | 58 +/- 7.5 (n = 19)                      | 110 +/- 15 (n = 16) <sup>**</sup>    |
| <b>Total Cholesterol</b>                                                                       | 3 +/- 0.19 (n = 7)       | 3 +/- 0.29 (n = 3)           | 5.6 +/- 0.16 (n = 10) <sup>***</sup>     | 5.5 +/- 0.2 (n = 7)                  |

| % Liver triglyceride composition |                            |                            |                               |                               |
|----------------------------------|----------------------------|----------------------------|-------------------------------|-------------------------------|
|                                  | NC                         |                            | HFD                           |                               |
|                                  | Control                    | L-PTP1b <sup>-/-</sup>     | Control                       | L-PTP1b <sup>-/-</sup>        |
| <b>Tg C48:3</b>                  | 0.192 +/- 0.0161 (n = 7)   | 0.116 +/- 0.0242 (n = 3)^  | 0.17 +/- 0.0187 (n = 10)      | 0.103 +/- 0.0164 (n = 6)*     |
| <b>Tg C48:2</b>                  | 0.467 +/- 0.0411 (n = 7)   | 0.281 +/- 0.0398 (n = 3)^  | 0.339 +/- 0.0346 (n = 10)*    | 0.297 +/- 0.0333 (n = 6)      |
| <b>Tg C48:1</b>                  | n.d.                       | n.d.                       | 0.338 +/- 0.105 (n = 6)       | 0.223 +/- 0.023 (n = 4)       |
| <b>Tg C50:4</b>                  | 0.572 +/- 0.0342 (n = 7)   | 0.446 +/- 0.0569 (n = 3)   | 0.476 +/- 0.0361 (n = 10)     | 0.461 +/- 0.0495 (n = 6)      |
| <b>Tg C50:3</b>                  | 2.58 +/- 0.205 (n = 7)     | 2.44 +/- 0.264 (n = 3)     | 2.16 +/- 0.192 (n = 10)       | 2.34 +/- 0.153 (n = 6)        |
| <b>Tg C50:2</b>                  | 4.83 +/- 0.363 (n = 7)     | 4.26 +/- 0.313 (n = 3)     | 3.54 +/- 0.265 (n = 10)*      | 4.71 +/- 0.185 (n = 6)*       |
| <b>Tg C50:1</b>                  | 1.57 +/- 0.138 (n = 7)     | 1.3 +/- 0.0544 (n = 3)     | 1.53 +/- 0.192 (n = 10)       | 1.85 +/- 0.15 (n = 6)         |
| <b>Tg C52:5</b>                  | 2.53 +/- 0.179 (n = 7)     | 1.42 +/- 0.728 (n = 3)*    | 1.31 +/- 0.0628 (n = 10)***   | 1.02 +/- 0.0926 (n = 6)*      |
| <b>Tg C52:4</b>                  | 17 +/- 0.465 (n = 7)       | 16.6 +/- 0.225 (n = 3)     | 9.07 +/- 0.515 (n = 10)***    | 7.58 +/- 0.455 (n = 6)        |
| <b>Tg C52:3</b>                  | 27 +/- 0.887 (n = 7)       | 29.9 +/- 0.308 (n = 3)     | 25.4 +/- 1.46 (n = 10)        | 26.4 +/- 0.702 (n = 6)        |
| <b>Tg C52:2</b>                  | 9.25 +/- 0.543 (n = 7)     | 11.8 +/- 0.839 (n = 3)*    | 20.5 +/- 1.15 (n = 10)***     | 27.5 +/- 1.04 (n = 6)**       |
| <b>Tg C54:7</b>                  | 1.89 +/- 0.126 (n = 7)     | 1.63 +/- 0.222 (n = 3)     | 0.164 +/- 0.0204 (n = 4)***   | 0.0763 +/- 0.0158 (n = 6)*    |
| <b>Tg C54:6</b>                  | 4.17 +/- 0.141 (n = 7)     | 3.37 +/- 0.417 (n = 3)*    | 1.34 +/- 0.223 (n = 10)***    | 0.563 +/- 0.0562 (n = 6)*     |
| <b>Tg C54:5</b>                  | 6.2 +/- 0.218 (n = 7)      | 5.55 +/- 0.795 (n = 3)     | 5.42 +/- 0.65 (n = 10)        | 2.94 +/- 0.193 (n = 6)*       |
| <b>Tg C54:4</b>                  | 5.83 +/- 0.216 (n = 7)     | 5.88 +/- 0.718 (n = 3)     | 12.2 +/- 0.999 (n = 10)***    | 8.7 +/- 0.217 (n = 6)*        |
| <b>Tg C54:3</b>                  | 2.83 +/- 0.217 (n = 7)     | 2.82 +/- 0.307 (n = 3)     | 12 +/- 1.36 (n = 10)***       | 11.4 +/- 0.547 (n = 6)        |
| <b>Tg C54:2</b>                  | 0.47 +/- 0.078 (n = 7)     | 0.402 +/- 0.0861 (n = 3)   | 1.45 +/- 0.164 (n = 10)***    | 1.81 +/- 0.31 (n = 6)         |
| <b>Tg C56:10</b>                 | 0.0646 +/- 0.00706 (n = 7) | 0.0424 +/- 0.00595 (n = 3) | n.d.                          | n.d.                          |
| <b>Tg C56:9</b>                  | 0.715 +/- 0.0648 (n = 7)   | 0.559 +/- 0.0516 (n = 3)   | 0.0357 +/- 0.00307 (n = 8)*** | 0.0101 +/- 0.00242 (n = 5)*** |
| <b>Tg C56:8</b>                  | 7.37 +/- 0.656 (n = 7)     | 6.51 +/- 1.04 (n = 3)      | 0.246 +/- 0.015 (n = 10)***   | 0.0696 +/- 0.0113 (n = 6)***  |
| <b>Tg C56:7</b>                  | 5.47 +/- 0.313 (n = 7)     | 5.44 +/- 0.518 (n = 3)     | 0.816 +/- 0.0643 (n = 10)***  | 0.3 +/- 0.0566 (n = 6)***     |
| <b>Tg C56:6</b>                  | 1.07 +/- 0.0777 (n = 7)    | 0.978 +/- 0.0304 (n = 3)   | 0.799 +/- 0.034 (n = 10)**    | 0.49 +/- 0.0744 (n = 6)**     |
| <b>Tg C56:5</b>                  | 0.48 +/- 0.0548 (n = 7)    | 0.434 +/- 0.0447 (n = 3)   | 0.758 +/- 0.0514 (n = 10)**   | 0.688 +/- 0.069 (n = 6)       |
| <b>Tg C56:4</b>                  | 0.332 +/- 0.0448 (n = 7)   | 0.278 +/- 0.0585 (n = 3)   | 0.657 +/- 0.0466 (n = 10)***  | 0.944 +/- 0.129 (n = 6)*      |
| <b>Tg C56:3</b>                  | n.d.                       | n.d.                       | 0.484 +/- 0.0557 (n = 6)      | 0.874 +/- 0.153 (n = 4)       |
| <b>Tg C56:2</b>                  | n.d.                       | n.d.                       | 0.0892 +/- 0.023 (n = 6)      | 0.0606 +/- 0.015 (n = 4)      |

Quantification of liver triglycerides and cholesterol is written as mean +/- standard error for each of the diet and genotype conditions. Number of mice analyzed per condition is denoted in parentheses. Statistical analysis was performed using one-way ANOVA with



sequential Sidak-Dunn method to adjust for multiple comparisons: (1) L-PTP1b<sup>-/-</sup> mice to control on NC diet, (2) L-PTP1b<sup>-/-</sup> mice to control on HFD, and (3) HFD control to NC control. \*\*\* =  $P < .001$ , \*\* =  $P < .01$ , \* =  $P < .05$ , ^ =  $P < .1$ .

**Table S8: HFD Serum Triglyceride Compositions**

| <b>HFD Serum Triglyceride Compositions</b> |                                        |                              |                            |                              |
|--------------------------------------------|----------------------------------------|------------------------------|----------------------------|------------------------------|
|                                            | <b>Absolute Quantification (mg/dL)</b> |                              | <b>Percent Composition</b> |                              |
|                                            | <b>Control</b>                         | <b>L-PTP1b<sup>-/-</sup></b> | <b>Control</b>             | <b>L-PTP1b<sup>-/-</sup></b> |
| <b>Tg C48:3</b>                            | 0.19 +/- 0.09 (n = 7)                  | 0.18 +/- 0.17 (n = 6)        | 0.39 +/- 0.13 (n = 7)      | 0.32 +/- 0.18 (n = 6)        |
| <b>Tg C48:2</b>                            | 0.26 +/- 0.14 (n = 7)                  | 0.3 +/- 0.25 (n = 6)         | 0.53 +/- 0.19 (n = 7)      | 0.56 +/- 0.24 (n = 6)        |
| <b>Tg C50:3</b>                            | 0.71 +/- 0.32 (n = 7)                  | 0.75 +/- 0.61 (n = 6)        | 1.47 +/- 0.46 (n = 7)      | 1.44 +/- 0.54 (n = 6)        |
| <b>Tg C50:2</b>                            | 1.89 +/- 1.04 (n = 7)                  | 2.45 +/- 1.81 (n = 6)        | 3.89 +/- 1.54 (n = 7)      | 4.8 +/- 1.43 (n = 6)         |
| <b>Tg C50:1</b>                            | 1.81 +/- 0.91 (n = 7)                  | 2.31 +/- 1.29 (n = 6)        | 3.68 +/- 1.14 (n = 7)      | 5.01 +/- 0.27 (n = 6)*       |
| <b>Tg C50:0</b>                            | 0.27 +/- 0.14 (n = 7)                  | 0.33 +/- 0.12 (n = 6)        | 0.54 +/- 0.15 (n = 7)      | 0.83 +/- 0.28 (n = 6)*       |
| <b>Tg C52:7</b>                            | 0.09 +/- 0.03 (n = 7)                  | 0.06 +/- 0.03 (n = 6)        | 0.19 +/- 0.07 (n = 7)      | 0.13 +/- 0.02 (n = 6)^       |
| <b>Tg C52:6</b>                            | 0.4 +/- 0.08 (n = 7)                   | 0.31 +/- 0.18 (n = 6)        | 0.87 +/- 0.17 (n = 7)      | 0.65 +/- 0.07 (n = 6)*       |
| <b>Tg C52:5</b>                            | 2.16 +/- 0.57 (n = 7)                  | 1.79 +/- 1.25 (n = 6)        | 4.55 +/- 0.53 (n = 7)      | 3.56 +/- 0.92 (n = 6)*       |
| <b>Tg C52:4</b>                            | 8.4 +/- 2.42 (n = 7)                   | 7.42 +/- 4.66 (n = 6)        | 17.67 +/- 2.36 (n = 7)     | 15.23 +/- 2.72 (n = 6)       |
| <b>Tg C52:3</b>                            | 8.26 +/- 2.38 (n = 7)                  | 7.54 +/- 3.87 (n = 6)        | 17.3 +/- 1.55 (n = 7)      | 16.72 +/- 1.17 (n = 6)       |
| <b>Tg C52:2</b>                            | 6.92 +/- 2.62 (n = 7)                  | 8.06 +/- 3.45 (n = 6)        | 14.2 +/- 1.94 (n = 7)      | 18.73 +/- 2.79 (n = 6)**     |
| <b>Tg C54:7</b>                            | 0.42 +/- 0.13 (n = 7)                  | 0.29 +/- 0.16 (n = 6)        | 0.91 +/- 0.31 (n = 7)      | 0.64 +/- 0.08 (n = 6)^       |
| <b>Tg C54:6</b>                            | 1.6 +/- 0.48 (n = 7)                   | 1.12 +/- 0.62 (n = 6)        | 3.46 +/- 0.98 (n = 7)      | 2.47 +/- 0.28 (n = 6)*       |
| <b>Tg C54:5</b>                            | 3.3 +/- 0.7 (n = 7)                    | 2.6 +/- 1.44 (n = 6)         | 7.08 +/- 1.3 (n = 7)       | 5.64 +/- 0.44 (n = 6)*       |
| <b>Tg C54:4</b>                            | 2.5 +/- 0.65 (n = 7)                   | 2.16 +/- 1.17 (n = 6)        | 5.34 +/- 1.1 (n = 7)       | 4.81 +/- 0.59 (n = 6)        |
| <b>Tg C54:3</b>                            | 4.29 +/- 1.06 (n = 7)                  | 4.73 +/- 2.15 (n = 6)        | 9.05 +/- 1.17 (n = 7)      | 10.86 +/- 1.2 (n = 6)*       |
| <b>Tg C54:2</b>                            | 0.9 +/- 0.47 (n = 7)                   | 0.94 +/- 0.44 (n = 6)        | 1.8 +/- 0.48 (n = 7)       | 2.15 +/- 0.32 (n = 6)        |
| <b>Tg C56:9</b>                            | 0.14 +/- 0.07 (n = 7)                  | 0.07 +/- 0.04 (n = 6)*       | 0.32 +/- 0.17 (n = 7)      | 0.16 +/- 0.03 (n = 6)*       |
| <b>Tg C56:8</b>                            | 0.64 +/- 0.31 (n = 7)                  | 0.32 +/- 0.17 (n = 6)^       | 1.4 +/- 0.7 (n = 7)        | 0.74 +/- 0.16 (n = 6)*       |
| <b>Tg C56:7</b>                            | 1.12 +/- 0.55 (n = 7)                  | 0.7 +/- 0.3 (n = 6)          | 2.43 +/- 1.17 (n = 7)      | 1.68 +/- 0.39 (n = 6)        |
| <b>Tg C56:4</b>                            | 0.38 +/- 0.11 (n = 7)                  | 0.42 +/- 0.14 (n = 6)        | 0.8 +/- 0.09 (n = 7)       | 1.06 +/- 0.33 (n = 6)^       |
| <b>Tg C56:3</b>                            | 0.37 +/- 0.17 (n = 7)                  | 0.42 +/- 0.16 (n = 6)        | 0.75 +/- 0.18 (n = 7)      | 1.02 +/- 0.26 (n = 6)^       |
| <b>Tg C58:10</b>                           | 0.16 +/- 0.13 (n = 7)                  | 0.06 +/- 0.02 (n = 6)^       | 0.36 +/- 0.27 (n = 7)      | 0.16 +/- 0.05 (n = 6)        |
| <b>Tg C58:9</b>                            | 0.25 +/- 0.17 (n = 7)                  | 0.12 +/- 0.04 (n = 6)^       | 0.56 +/- 0.38 (n = 7)      | 0.32 +/- 0.13 (n = 6)        |
| <b>Tg C58:8</b>                            | 0.21 +/- 0.14 (n = 7)                  | 0.12 +/- 0.03 (n = 6)        | 0.47 +/- 0.28 (n = 7)      | 0.32 +/- 0.12 (n = 6)        |
| <b>Total</b>                               | 47.64 +/- 12.19 (n = 7)                | 45.55 +/- 24.01 (n = 6)      |                            |                              |

Quantification of serum triglycerides is written as mean +/- standard error for HFD conditions. Number of mice analyzed per condition is denoted in parentheses. Statistical analysis was performed using two-tailed Student's T-tests. L-PTP1b-/- mice were compared to control. \*\* =  $P_{\text{raw}} < .01$ , \* =  $P_{\text{raw}} < .05$ , ^ =  $P_{\text{raw}} < .1$ .

**Table S9: Enrichments for phosphosites predictive of the PTP1b-dependent  $\omega 3$  /  $\omega 6$  PUFA (C24:6, C24:5, C24:4, C22:3, C20:3)**

| $P_{\text{raw}}$ | NES  | Category Label               | N  | Category Membership                                                                                                                                                                                                                                                                              | Source                    |
|------------------|------|------------------------------|----|--------------------------------------------------------------------------------------------------------------------------------------------------------------------------------------------------------------------------------------------------------------------------------------------------|---------------------------|
| 1.1E-04**        | 2.44 | <b>Metabolic process</b>     | 25 | CYP2E1 Y426, CYB5A Y11, CAR2 Y114, LDHA Y239, PGM1 Y353, GAPDH Y316, PRDX6 Y89, CTH Y113, CPS1 Y162, TGM2 Y369*, <i>ARG1 Y188, GPX1 Y147, ARG1 Y197, PCBD1 Y70, ENO1 Y44, GAPDH Y328, ACAT1 Y328, HADHA Y724, PGAM2 Y92, CPS1 Y140, GLUD1 Y135, CPS1 Y590, GLUD1 Y512, ARG1 Y265, CPS1 Y1450</i> | GO                        |
| 1.1E-04**        | 2.43 | <b>Oxidation reduction</b>   | 24 | CYP2E1 Y426, CYB5A Y11, SAHH Y193, HPD Y232, LDHA Y239, HPD Y221, HGD Y40, GAPDH Y316, PRDX6 Y89, FASN Y1248, ALDH1A7 Y484*, <i>UOX Y288, GPX1 Y147, ALDH1L1 Y848, CAT Y231, ALDH6A1 Y268, UGDH Y108, GAPDH Y328, CAT Y84, UOX Y230, HADHA Y724, GLUD1 Y135, GLUD1 Y512, ACAD11 Y323</i>         | GO, SwissProt, Literature |
| 1.4E-03^         | 2.13 | <b>Endoplasmic Reticulum</b> | 16 | CYP2E1 Y426, CALM1 Y100, GLUL Y336, CYB5A Y11, PEBP1 Y181, HPD Y232*, <i>HPD Y221, VCP Y173, ASS1 Y133, CAV1 Y14 Y6, CAT Y231, ALDOB Y204, ACSL5 Y69, CAT Y84, HSPD1 Y385, ASS1 Y322,</i>                                                                                                        | GO                        |

NES stands for normalized enrichment scores. \*\* = FDR = .01, \* = FDR = .05, ^ = FDR = .1. NES > 0 indicates that increased phosphorylation on sites in the pathway are positively predictive of proportion of  $\omega 3$  /  $\omega 6$  PUFA, while NES < 0 indicates that increased phosphorylation on sites in the pathway are negatively predictive. The phosphosites in each category membership are ordered from most positively to most negatively predictive. Those phosphosites that contributed most to the enrichment (compose the “leading edge”) appear in regular font, while the other sites in that category are italicized.

**Table S10: Enrichments for phosphosites predictive of PTP1b-dependent  $\omega 7 / \omega 9$  PUFA (C20:3, C22:3, C20:2, C18:3)**

| <b>P<sub>raw</sub></b> | <b>NES</b> | <b>Category Label</b> | <b>N</b> | <b>Category Membership</b>                                                                                                                                                                                                                                                                                                                                                                                                                                                                                                                                                                                                                                                                                                                                                                                                                                                                                                                                                                                                                                                         | <b>Source</b>             |
|------------------------|------------|-----------------------|----------|------------------------------------------------------------------------------------------------------------------------------------------------------------------------------------------------------------------------------------------------------------------------------------------------------------------------------------------------------------------------------------------------------------------------------------------------------------------------------------------------------------------------------------------------------------------------------------------------------------------------------------------------------------------------------------------------------------------------------------------------------------------------------------------------------------------------------------------------------------------------------------------------------------------------------------------------------------------------------------------------------------------------------------------------------------------------------------|---------------------------|
| <2E-05**               | 2.53       | Oxidation reduction   | 24       | CYB5A Y11, ALDH1A7 Y484, CYP2E1 Y426, GAPDH Y316, SAHH Y193, FASN Y1248, HPD Y221, LDHA Y239, HPD Y232, PRDX6 Y89, CAT Y231*, <i>GPX1 Y147, HGD Y40, UOX Y288, ALDH1L1 Y848, ALDH6A1 Y268, GLUD1 Y135, CAT Y84, GAPDH Y328, ACAD11 Y323, UGDH Y108, UOX Y230, HADHA Y724, GLUD1 Y512</i>                                                                                                                                                                                                                                                                                                                                                                                                                                                                                                                                                                                                                                                                                                                                                                                           | GO, SwissProt, Literature |
| 7.4E-04*               | 2.31       | Metabolic process     | 25       | CYB5A Y11, CYP2E1 Y426, GAPDH Y316, TGM2 Y369, CAR2 Y114, LDHA Y239, PGM1 Y353, PRDX6 Y89, CPS1 Y162, ARG1 Y188, GPX1 Y147, ENO1 Y44*, <i>GLUD1 Y135, CTH Y113, PCBD1 Y70, GAPDH Y328, PGAM2 Y92, CPS1 Y590, HADHA Y724, ARG1 Y197, ACAT1 Y328, ARG1 Y265, GLUD1 Y512, CPS1 Y140, CPS1 Y1450</i>                                                                                                                                                                                                                                                                                                                                                                                                                                                                                                                                                                                                                                                                                                                                                                                   | GO                        |
| 1.1E-03^               | 2.25       | Cytosol               | 88       | ACLY Y672, SAHH Y193, SHP-2 Y584, FASN Y1248, HPD Y221, TGM2 Y369, TARS Y297, CALM1 Y100, CAR2 Y114, LDHA Y239, PGM1 Y353, HPD Y232, PRDX6 Y89, VCP Y173, CAT Y231, BCAR1 Y271, PITPNA Y141, GRF-1 Y1105*, <i>OTC Y317, GNMT Y221, CrkL Y198, GPX1 Y147, Hrs Y216, PLCG1 Y771, LHPP Y159, GSK3B Y216 S219, ALDOB Y204, p38-alpha Y182 T180, ERK2 Y185 T188/T183, ERK1 Y205, vinculin Y822, PGK1 Y196, ERK2 Y185, IRS2 Y671, BCAR1 Y391, CAV1 Y14 Y6, CAT Y84, GSK3B Y216, CTNND1 Y904, vinculin Y692, Shc1 Y313, Abl Y393, SHMT1 Y28, BCAR1 Y238, JAK2 Y570, CTNND1 Y96, BCAR1 Y414, FAK Y576, Yes Y220, GNMT Y34, SHMT1 Y67, IRS2 Y649, GRF-1 Y1087, BCAR1 Y556, Lyn Y173, SEC14L4 Y36, BCAR1 Y253, BCAR1 Y291, PGAM2 Y92, IRS2 Y814, UGDH Y108, Lyn Y376, FBP1 Y245, Yes Y424, Dok1 Y408, SHP-2 Y62, FAK Y397, CTNNB1 Y654, p38-alpha Y182, FAK Y861, GOT1 Y264, Nck1 Y105, RPL13A Y137, DLG1 Y783, eEF1A1 Y177, talin 1 Y1116, Fgr Y197, FAK Y577 T575, SCAP2 Y260, HSPD1 Y385, FBP1 Y216, SEC14L4 Y36, STAT3 Y686, CrkL Y132, Dok1 Y361, PIK3R1 Y197, Dok1 Y450, FBP1 Y265</i> | GO                        |
| 1.3E-03^               | 2.23       | Endoplasmic Reticulum | 16       | CYB5A Y11, CYP2E1 Y426, GLUL Y336, HPD Y221, CALM1 Y100, PEBP1 Y181, HPD Y232, VCP Y173, CAT Y231, ASS1 Y133*, <i>ALDOB Y204, CAV1 Y14 Y6, CAT Y84, ACSL5 Y69, HSPD1</i>                                                                                                                                                                                                                                                                                                                                                                                                                                                                                                                                                                                                                                                                                                                                                                                                                                                                                                           | GO                        |

|  |  |  |  |                        |  |
|--|--|--|--|------------------------|--|
|  |  |  |  | <i>Y385, ASS1 Y322</i> |  |
|--|--|--|--|------------------------|--|

NES stands for normalized enrichment scores. \*\* = FDR = .01, \* = FDR = .05, ^ = FDR = .1. NES > 0 indicates that increased phosphorylation on sites in pathway are positively predictive of proportion of  $\omega 7 / \omega 9$  PUFA, while NES < 0 indicates that increased phosphorylation on sites in the pathway are negatively predictive. The phosphosites in each category membership are ordered from most positively to most negatively predictive of phenotype. Those phosphosites that contributed most to the enrichment (compose the “leading edge”) appear in regular font, while the other sites in that category are italicized.

**Table S11: Enrichments for phosphosites predictive of steatosis**

| <b>P<sub>raw</sub></b> | <b>NES</b> | <b>Category Label</b>              | <b>N</b> | <b>Category Membership</b>                                                                                                                                                                                                                                                                                                                                                                         | <b>Source</b>             |
|------------------------|------------|------------------------------------|----------|----------------------------------------------------------------------------------------------------------------------------------------------------------------------------------------------------------------------------------------------------------------------------------------------------------------------------------------------------------------------------------------------------|---------------------------|
| 1.1E-04**              | 2.55       | <b>Oxidation reduction</b>         | 24       | GAPDH Y316, ALDH1A7 Y484, HPD Y221, CYP2E1 Y426, CYB5A Y11, FASN Y1248, CAT Y84, GPX1 Y147, HGD Y40, SAHH Y193, PRDX6 Y89, ALDH1L1 Y848, ACAD11 Y323, LDHA Y239*, <i>HPD Y232, CAT Y231, GLUD1 Y512, ALDH6A1 Y268, UOX Y288, UGDH Y108, GLUD1 Y135, GAPDH Y328, UOX Y230, HADHA Y724</i>                                                                                                           | GO, SwissProt, Literature |
| 4.9E-04*               | 2.37       | <b>Metabolic process</b>           | 25       | GAPDH Y316, TGM2 Y369, CYP2E1 Y426, PGM1 Y353, ENO1 Y44, CYB5A Y11, GPX1 Y147, ARG1 Y188, PRDX6 Y89*, LDHA Y239, CAR2 Y114, PGAM2 Y92, GLUD1 Y512, ARG1 Y265, ARG1 Y197, PCBD1 Y70, CPS1 Y162, CTH Y113, CPS1 Y590, GLUD1 Y135, GAPDH Y328, HADHA Y724, ACAT1 Y328, CPS1 Y140, CPS1 Y1450                                                                                                          | GO                        |
| 7.8E-04*               | -2.17      | <b>Chemokine signaling pathway</b> | 32       | JAK2 Y570, Pyk2 Y807, Pyk2 Y579 Y580, CrkL Y198, Shc1 Y313, BCAR1 Y238, BCAR1 Y556, BCAR1 Y271, FAK Y576, Pyk2 Y579, GSK3B Y216 S219, FAK Y397, FAK Y861, BCAR1 Y391, BCAR1 Y414, CrkL Y132*, N-WASP Y253, FAK Y577 T575, PXN Y118, GSK3B Y216, Lyn Y376, STAT3 Y686, BCAR1 Y291, PARD3 Y1076, BCAR1 Y253, ERK2 Y185 T188/T183, PIK3R1 Y197, Fgr Y197, PARD3 Y1123, ERK2 Y185, ERK1 Y205, Lyn Y173 | KEGG                      |
| 8.2E-04^               | -2.17      | <b>Adherens junction</b>           | 23       | <i>vinculin Y822, ZO1 Y1066, Fer Y402, CTNND1 Y904, CTNNB1 Y654, ZO1 Y1360, Met Y1001, vinculin Y692, CTNND1 Y96, Fer Y715, CTNNA1 Y619, N-WASP Y253, PARD3 Y1076*, ERK2 Y185 T188/T183, EGFR Y1172, CTNNA1 Y177, Yes Y220, PARD3 Y1123, ERK2 Y185, ERK1 Y205, ZO1 Y1145, Yes Y424, EGFR Y1197</i>                                                                                                 | KEGG                      |

NES stands for normalized enrichment scores. \*\* = FDR = .01, \* = FDR = .05, ^ = FDR = .1. NES > 0 indicates that phosphorylation on sites in pathway most significantly increase with steatosis, while NES < 0 indicates that phosphorylation on sites in the pathway decrease with steatosis. The phosphosites in each category membership are ordered from most positively-predictive of steatosis to most negatively-predictive of steatosis. Those phosphosites that contributed most to the enrichment (compose the “leading edge”) appear in regular font, while the other sites in that category are italicized.
